# Supplementary material for: Transcriptomic Analysis of the Anticancer Effects of Annatto Tocotrienol, Delta-Tocotrienol and Gamma-Tocotrienol on Chondrosarcoma Cells
Source: Nutrients. 2022 Oct 13;14(20):4277. doi: 10.3390/nu14204277 (PMC9611384; doi:10.3390/nu14204277)
Supplement: Supplementary file 1 [file nutrients-14-04277-s001.zip]

Archive with 6 entries (6 files):
- S1 - The primer sequences used in this study.pdf
- S2 - The purity, quality and concentration of isolated RNAs.pdf
- S3 - Summary of read mapping quality.pdf
- S4 - List of up- and downregulated DEGs.xlsx
- S5 - GO terms for up- and downregulated DEGs.xlsx
- S6 - KEGG enriched pathway for tocotrienol treatments.xlsx
