# Supplementary material for: Transcriptomic Analysis of the Anticancer Effects of Annatto Tocotrienol, Delta-Tocotrienol and Gamma-Tocotrienol on Chondrosarcoma Cells
Source: Nutrients. 2022 Oct 13;14(20):4277. doi: 10.3390/nu14204277 (PMC9611384; doi:10.3390/nu14204277)
Supplement: Supplementary file 1 [file nutrients-14-04277-s001.zip › S1 - The primer sequences used in this study.pdf]

**Supplementary Table S1:** The primer sequences used in this study

| Gene name | Sequences |                               |
|-----------|-----------|-------------------------------|
| GAPDH     | Forward   | 5'- GTCAGTGGTGGACCTGACCT-3'   |
|           | Reverse   | 5'-ACCTGGTGCTCAGTGTAGCC-3'    |
| ADAMTSL1  | Forward   | 5'- TTAAGCTCATCGGAGGCAAC-3'   |
|           | Reverse   | 5'- AGATCCCGTTCTGGTGTTTG-3'   |
| HMGCS1    | Forward   | 5'- TGTGGAGAAGGCATTTATGAAG-3' |
|           | Reverse   | 5'- AGAACAGATGCAAGGGAACC-3'   |
| KLHDC7B   | Forward   | 5'- CTGCACCATGCACAACTACC-3'   |
|           | Reverse   | 5'- GAACCTGGCTCCAGATGTTG-3'   |
| ARMCX3    | Forward   | 5'- TCGCTTGAATCATCTGTGC-3'    |
|           | Reverse   | 5'- TTTCCCGCTGAAAATAAACG-3'   |
