# Supplementary material for: Transcriptomic Analysis of the Anticancer Effects of Annatto Tocotrienol, Delta-Tocotrienol and Gamma-Tocotrienol on Chondrosarcoma Cells
Source: Nutrients. 2022 Oct 13;14(20):4277. doi: 10.3390/nu14204277 (PMC9611384; doi:10.3390/nu14204277)
Supplement: Supplementary file 1 [file nutrients-14-04277-s001.zip › S2 - The purity, quality and concentration of isolated RNAs.pdf]

**Supplementary Table S2:** The purity, quality and concentration of isolated RNAs

| Groups       | Sample ID | RNA concentration (ng/ $\mu$ L) | 260/280 ratio | RIN |
|--------------|-----------|---------------------------------|---------------|-----|
| VC           | V1        | 309.5                           | 2.05          | 9.5 |
|              | V2        | 278.4                           | 2.06          | 9.8 |
|              | V3        | 295.5                           | 2.05          | 9.5 |
| AnTT         | A1        | 164.3                           | 2.05          | 9.2 |
|              | A2        | 166                             | 2.07          | 9.6 |
|              | A3        | 135.5                           | 2.05          | 8.1 |
| $\gamma$ -T3 | G1        | 115.6                           | 2.06          | 9.3 |
|              | G2        | 111.3                           | 2.06          | 8.9 |
|              | G3        | 123.9                           | 2.05          | 8.5 |
| $\delta$ -T3 | D1        | 116.2                           | 2.06          | 9.1 |
|              | D2        | 120.1                           | 2.07          | 9.1 |
|              | D3        | 134.3                           | 2.06          | 9.1 |

Abbreviations: 260/280 ratio, the ratio of absorbance at 260 nm and 280 nm, AnTT, annatto tocotrienol, RIN, RNA integrity number,  $\delta$ -T3,  $\delta$ -tocotrienol,  $\gamma$ -T3,  $\gamma$ -tocotrienol, VC, vehicle control
