# Supplementary material for: Transcriptomic Analysis of the Anticancer Effects of Annatto Tocotrienol, Delta-Tocotrienol and Gamma-Tocotrienol on Chondrosarcoma Cells
Source: Nutrients. 2022 Oct 13;14(20):4277. doi: 10.3390/nu14204277 (PMC9611384; doi:10.3390/nu14204277)
Supplement: Supplementary file 1 [file nutrients-14-04277-s001.zip › S3 - Summary of read mapping quality.pdf]

**Supplementary Table S3: Summary of read mapping quality**

| <b>Groups</b> | <b>Sample ID</b> | <b>Total reads</b> | <b>Trimmed reads</b> | <b>Low quality (Q&lt;20)</b> | <b>Clean reads</b>  | <b>Aligned and mapped reads</b> |
|---------------|------------------|--------------------|----------------------|------------------------------|---------------------|---------------------------------|
| VC            | V1               | 15,350,229         | 4,259,523            | 85,114 (0.55%)               | 15,265,115 (99.44%) | 12,941,555 (84.78%)             |
|               | V2               | 12,834,646         | 3,754,070            | 77,022 (0.60%)               | 12,757,624 (99.40%) | 10,702,791 (83.89%)             |
|               | V3               | 15,619,857         | 4,599,524            | 82,495 (0.53%)               | 15,537,362 (99.47%) | 13,208,234 (85.01%)             |
| AnTT          | A1               | 14,108,686         | 4,261,142            | 86,856 (0.62%)               | 14,021,830 (99.38%) | 11,519,918 (82.16%)             |
|               | A2               | 15,327,571         | 4,577,364            | 90,251 (0.59%)               | 15,237,320 (99.41%) | 12,710,520 (83.42%)             |
|               | A3               | 15,327,632         | 4,752,035            | 85,222 (0.56%)               | 15,242,410 (99.44%) | 12,571,898 (82.48%)             |
| $\gamma$ -T3  | G1               | 16,361,773         | 4,940,168            | 122,143 (0.75%)              | 16,239,630 (99.25%) | 13,088,726 (80.30%)             |
|               | G2               | 14,836,309         | 4,325,261            | 102,929 (0.69%)              | 14,733,380 (99.31%) | 12,082,682 (81.47%)             |
|               | G3               | 15,396,105         | 4,260,140            | 90,630 (0.59%)               | 15,305,475 (99.41%) | 12,707,032 (82.08%)             |
| $\delta$ -T3  | D1               | 13,273,092         | 4,154,452            | 78,506 (0.59%)               | 13,194,586 (99.41%) | 10,595,045 (80.60%)             |
|               | D2               | 13,481,565         | 4,067,438            | 76,614 (0.57%)               | 13,404,951 (99.43%) | 10,921,551 (82.01%)             |
|               | D3               | 13,251,041         | 3,521,157            | 83,689 (0.63%)               | 13,167,352 (99.37%) | 10,807,338 (83.02%)             |

Abbreviations: AnTT, annatto tocotrienol, RIN, RNA integrity number,  $\delta$ -T3,  $\delta$ -tocotrienol,  $\gamma$ -T3,  $\gamma$ -tocotrienol, VC, vehicle control
