# Supplementary material for: Transcriptomic Analysis of the Anticancer Effects of Annatto Tocotrienol, Delta-Tocotrienol and Gamma-Tocotrienol on Chondrosarcoma Cells
Source: Nutrients. 2022 Oct 13;14(20):4277. doi: 10.3390/nu14204277 (PMC9611384; doi:10.3390/nu14204277)
Supplement: Supplementary file 1 [file nutrients-14-04277-s001.zip › S4 - List of up- and downregulated DEGs.xlsx]

## Sheet: Output_DESeq2_AnTT_vs_VC
	baseMean	log2FoldChange	lfcSE	stat	pvalue	padj	gene	entrezgene_id	external_gene_name
1	5835.64	3.58429	0.0969998	26.6423	2.20004e-156	4.62889e-152	ENSG00000051108	9709	HERPUD1
2	75981.2	3.05343	0.0885269	23.1956	5.04645e-119	5.30886e-115	ENSG00000044574	3309	HSPA5
3	2365.38	3.20716	0.0967459	22.814	3.33037e-115	2.3357e-111	ENSG00000112379	NA	ARFGEF3
4	5041.85	2.98236	0.0881039	22.5002	4.13059e-112	2.17269e-108	ENSG00000052749	23223	RRP12
5	907.147	-2.87776	0.0847468	-22.1574	8.86067e-109	3.72857e-105	ENSG00000186480	3638	INSIG1
6	845.417	3.94242	0.137707	21.3672	2.7003e-101	9.46905e-98	ENSG00000243742	113157	RPLP0P2
7	1030.26	3.49161	0.118642	21.0011	6.40578e-98	1.92539e-94	ENSG00000114388	10641	NPRL2
8	877.175	-2.96536	0.0963724	-20.3933	1.91615e-92	5.03946e-89	ENSG00000112972	3157	HMGCS1
9	909.946	-2.74173	0.0890535	-19.5582	3.51207e-85	8.21044e-82	ENSG00000079459	2222	FDFT1
10	713.567	5.47909	0.234067	19.136	1.26747e-81	2.66676e-78	ENSG00000139269	83729	INHBE
11	2216.16	3.06419	0.112388	18.3667	2.42818e-75	4.64445e-72	ENSG00000101255	57761	TRIB3
12	2245.39	3.02185	0.110123	18.3598	2.75388e-75	4.82847e-72	ENSG00000152409	133746	JMY
13	1717.31	2.8019	0.099424	18.1234	2.08409e-73	3.37302e-70	ENSG00000133103	57511	COG6
14	306.627	-3.28647	0.129513	-17.6544	9.41845e-70	1.41546e-66	ENSG00000120437	39	ACAT2
15	542.326	-2.90862	0.109343	-17.4554	3.1306e-68	4.39119e-65	ENSG00000052802	6307	MSMO1
16	283.555	-3.91889	0.167441	-17.4324	4.68624e-68	6.16241e-65	ENSG00000138347	84665	MYPN
17	592.355	-2.71447	0.0984024	-17.4231	5.51303e-68	6.82318e-65	ENSG00000144810	1295	COL8A1
18	1498.63	2.51463	0.0883094	17.1514	6.13046e-66	7.16583e-63	ENSG00000166123	84706	GPT2
19	409.306	-3.26092	0.132096	-17.1158	1.13111e-65	1.25255e-62	ENSG00000185697	4603	MYBL1
20	635.212	3.00751	0.12022	16.6986	1.34097e-62	1.41071e-59	ENSG00000119899	26503	SLC17A5
21	4803.51	2.37748	0.0828349	16.6292	4.28348e-62	4.29164e-59	ENSG00000140941	81631	MAP1LC3B
22	204.705	-3.81689	0.170414	-16.5297	2.24303e-61	2.14515e-58	ENSG00000180914	5021	OXTR
23	703.37	2.93018	0.11708	16.4859	4.6327e-61	4.23791e-58	ENSG00000099337	9424	KCNK6
24	1968.9	2.43159	0.0874758	16.3655	3.37004e-60	2.9544e-57	ENSG00000117682	79947	DHDDS
25	1327.58	2.56282	0.0973516	16.0534	5.41482e-58	4.55711e-55	ENSG00000137414	NA	FAM8A1
26	2205.86	3.106	0.131739	15.9861	1.59786e-57	1.29304e-54	ENSG00000128590	4189	DNAJB9
27	565.641	-3.01847	0.127805	-15.7934	3.45453e-56	2.69197e-53	ENSG00000106829	7091	TLE4
28	1974.69	-2.47602	0.0955632	-15.4455	8.09355e-54	6.08172e-51	ENSG00000154678	5137	PDE1C
29	2866.59	2.26348	0.0822079	15.3694	2.62702e-53	1.84241e-50	ENSG00000136868	1317	SLC31A1
30	374.963	4.65206	0.237604	15.3704	2.58651e-53	1.84241e-50	ENSG00000119508	8013	NR4A3
31	662.858	2.91138	0.12551	15.2289	2.27237e-52	1.54228e-49	ENSG00000060762	51660	MPC1
32	1182.69	2.70975	0.11235	15.2181	2.68252e-52	1.76375e-49	ENSG00000128923	54629	MINDY2
33	991.481	-2.45547	0.096418	-15.0955	1.73476e-51	1.10604e-48	ENSG00000183688	359845	RFLNB
34	508.498	3.49235	0.165738	15.0379	4.14544e-51	2.5653e-48	ENSG00000137494	338699	ANKRD42
35	1975.92	2.15794	0.0771314	15.0125	6.0805e-51	3.65525e-48	ENSG00000112715	7422	VEGFA
36	3726.64	-2.53214	0.103295	-14.8327	9.01036e-50	5.26605e-47	ENSG00000022267	2273	FHL1
37	1996.4	2.43996	0.0979236	14.7049	5.99583e-49	3.40952e-46	ENSG00000104907	55621	TRMT1
38	598.795	3.36273	0.162461	14.5434	6.42992e-48	3.56014e-45	ENSG00000175197	1649	DDIT3
39	1261.31	2.4134	0.0977592	14.458	2.23159e-47	1.20391e-44	ENSG00000177380	8541	PPFIA3
40	714.629	4.5691	0.249001	14.3337	1.34762e-46	7.08847e-44	ENSG00000215895	NA	HSPA5P1
41	5658.76	-2.24557	0.0870664	-14.306	2.00642e-46	1.02964e-43	ENSG00000148773	4288	MKI67
42	378.875	4.86756	0.270914	14.276	3.08908e-46	1.54748e-43	ENSG00000155961	116442	RAB39B
43	827.262	2.77304	0.124393	14.2536	4.2591e-46	2.08399e-43	ENSG00000168209	54541	DDIT4
44	1882.23	-2.32294	0.0935043	-14.1485	1.90819e-45	9.12463e-43	ENSG00000137831	55075	UACA
45	391.02	3.58603	0.183293	14.1087	3.35804e-45	1.57007e-42	ENSG00000230882	NA
46	4745.75	2.14526	0.081609	14.0335	9.72669e-45	4.43393e-42	ENSG00000105835	10135	NAMPT
47	220.263	-2.98404	0.141392	-14.0322	9.90469e-45	4.43393e-42	ENSG00000109084	27346	TMEM97
48	1586.91	-2.63455	0.116749	-14.0006	1.54507e-44	6.77256e-42	ENSG00000092820	7430	EZR
49	708.194	2.67843	0.120075	13.9782	2.11704e-44	9.09032e-42	ENSG00000157796	57728	WDR19
50	402.621	3.19427	0.157093	13.968	2.44394e-44	1.02841e-41	ENSG00000214595	400954	EML6
51	5234.06	-1.81093	0.0581885	-13.9363	3.81234e-44	1.57278e-41	ENSG00000116133	1718	DHCR24
52	541.095	-2.82044	0.131443	-13.8496	1.27901e-43	5.17508e-41	ENSG00000138771	57619	SHROOM3
53	581.648	-2.62462	0.118156	-13.7498	5.10446e-43	2.02637e-40	ENSG00000287080	8352	H3C3
54	776.552	-2.38794	0.101317	-13.699	1.02966e-42	4.01187e-40	ENSG00000100297	4174	MCM5
55	430.053	6.77018	0.421646	13.6849	1.24986e-42	4.78129e-40	ENSG00000187908	1755	DMBT1
56	414.807	-2.72393	0.126398	-13.639	2.34868e-42	8.82431e-40	ENSG00000113645	23286	WWC1
57	1753.61	2.41327	0.104721	13.4955	1.66139e-41	6.13256e-39	ENSG00000091592	22861	NLRP1
58	2514.61	2.01298	0.0754474	13.4263	4.24013e-41	1.53814e-38	ENSG00000100883	6729	SRP54
59	355.483	3.15681	0.160774	13.4152	4.92445e-41	1.75611e-38	ENSG00000106537	27075	TSPAN13
60	303.427	-2.846	0.138246	-13.353	1.13761e-40	3.98922e-38	ENSG00000146426	26230	TIAM2
61	1581.45	2.12136	0.0840126	13.3476	1.22365e-40	4.22059e-38	ENSG00000159399	3099	HK2
62	788.217	2.91533	0.143805	13.319	1.79613e-40	6.09527e-38	ENSG00000140830	54957	TXNL4B
63	1479.41	2.35742	0.101935	13.3165	1.8571e-40	6.20214e-38	ENSG00000070444	4335	MNT
64	495.011	-2.67512	0.126394	-13.2532	4.3256e-40	1.42204e-37	ENSG00000112144	22858	CILK1
65	619.586	2.86394	0.141464	13.1761	1.20524e-39	3.90128e-37	ENSG00000163644	152926	PPM1K
66	606.46	-2.34822	0.1024	-13.1661	1.37519e-39	4.38395e-37	ENSG00000040275	54908	SPDL1
67	2914.14	-2.28536	0.0978427	-13.137	2.02072e-39	6.25235e-37	ENSG00000011426	54443	ANLN
68	679.912	2.65766	0.126173	13.1379	1.99622e-39	6.25235e-37	ENSG00000187193	4501	MT1X
69	430.392	-2.5145	0.116009	-13.0551	5.9432e-39	1.81225e-36	ENSG00000186185	146909	KIF18B
70	472.753	2.7459	0.133811	13.0475	6.56575e-39	1.97348e-36	ENSG00000137171	89953	KLC4
71	2915.82	1.98041	0.0752041	13.0367	7.56621e-39	2.24216e-36	ENSG00000104419	10397	NDRG1
72	233.656	4.6383	0.279859	13.0005	1.21569e-38	3.5525e-36	ENSG00000130477	23025	UNC13A
73	2810.99	2.00127	0.077106	12.9857	1.47564e-38	4.25308e-36	ENSG00000127526	79939	SLC35E1
74	4238.64	1.83331	0.0643624	12.9472	2.43771e-38	6.93101e-36	ENSG00000120742	NA	SERP1
75	295.008	-2.7941	0.140099	-12.806	1.5176e-37	4.25739e-35	ENSG00000156475	5521	PPP2R2B
76	560.765	-2.57677	0.123162	-12.8024	1.58963e-37	4.40078e-35	ENSG00000276368	8331	H2AC14
77	1205.23	2.24939	0.0977583	12.7804	2.1086e-37	5.76167e-35	ENSG00000157800	84255	SLC37A3
78	659.441	2.41225	0.111142	12.7068	5.42341e-37	1.46293e-34	ENSG00000128965	79094	CHAC1
79	1440.87	-2.4441	0.113817	-12.6879	6.89929e-37	1.83748e-34	ENSG00000101333	5332	PLCB4
80	239.112	-3.12448	0.167704	-12.668	8.89409e-37	2.33914e-34	ENSG00000274997	85235	H2AC12
81	2714.88	-2.46886	0.116329	-12.6268	1.50315e-36	3.90449e-34	ENSG00000129116	23022	PALLD
82	1012.6	2.50249	0.119027	12.6231	1.57546e-36	4.0424e-34	ENSG00000068971	5526	PPP2R5B
83	251.305	4.4464	0.27311	12.6191	1.65667e-36	4.19955e-34	ENSG00000133134	84707	BEX2
84	629.675	2.57243	0.125094	12.57	3.08566e-36	7.72884e-34	ENSG00000125629	51141	INSIG2
85	523.237	2.75385	0.13986	12.54	4.50996e-36	1.11635e-33	ENSG00000122507	27241	BBS9
86	932.337	2.2035	0.0961628	12.5152	6.16412e-36	1.50806e-33	ENSG00000130733	78992	YIPF2
87	1961.41	-3.75502	0.220466	-12.4963	7.81905e-36	1.89095e-33	ENSG00000157168	3084	NRG1
88	976.871	2.30998	0.104899	12.4879	8.68819e-36	2.07727e-33	ENSG00000172071	9451	EIF2AK3
89	408.362	-2.70575	0.136882	-12.4614	1.21151e-35	2.86405e-33	ENSG00000119969	3070	HELLS
90	382.05	3.82013	0.226382	12.4574	1.27483e-35	2.98027e-33	ENSG00000135253	375616	KCP
91	2284.67	-2.1312	0.0909394	-12.4391	1.60387e-35	3.7083e-33	ENSG00000064666	1265	CNN2
92	2173.47	-2.19583	0.0965924	-12.3802	3.34615e-35	7.6525e-33	ENSG00000188229	NA	TUBB4B
93	653.292	2.36566	0.110393	12.3709	3.75551e-35	8.49633e-33	ENSG00000224271	NA
94	3483.2	1.82146	0.0665824	12.3375	5.68951e-35	1.27348e-32	ENSG00000140105	7453	WARS1
95	11834.5	2.15776	0.0940103	12.3153	7.49542e-35	1.66004e-32	ENSG00000149428	10525	HYOU1
96	863.308	-2.37066	0.112047	-12.233	2.07258e-34	4.5424e-32	ENSG00000145386	890	CCNA2
97	1912.65	-2.00096	0.0820526	-12.199	3.1459e-34	6.82369e-32	ENSG00000182481	3838	KPNA2
98	337.939	-2.61783	0.133921	-12.0805	1.33885e-33	2.87442e-31	ENSG00000198033	NA	TUBA3C
99	436.954	2.93338	0.160466	12.0485	1.97444e-33	4.19618e-31	ENSG00000130513	9518	GDF15
100	310.178	3.35821	0.195795	12.0443	2.07882e-33	4.37385e-31	ENSG00000188760	130612	TMEM198
101	2145.11	-2.21377	0.100806	-12.0407	2.17161e-33	4.52382e-31	ENSG00000145934	57451	TENM2
102	1135.03	-2.23064	0.102427	-12.0148	2.9701e-33	6.12657e-31	ENSG00000101224	994	CDC25B
103	1841.75	2.29738	0.108151	11.996	3.72858e-33	7.61645e-31	ENSG00000132510	23135	KDM6B
104	940.962	2.2143	0.10134	11.9825	4.39113e-33	8.8836e-31	ENSG00000258890	90799	CEP95
105	1525	-2.30446	0.108892	-11.9794	4.55778e-33	9.13293e-31	ENSG00000171848	6241	RRM2
106	862.559	2.42433	0.11956	11.9131	1.01145e-32	2.00764e-30	ENSG00000198718	23116	TOGARAM1
107	2988.9	1.95135	0.080034	11.8869	1.38468e-32	2.72277e-30	ENSG00000128607	23008	KLHDC10
108	3117.16	1.87124	0.0733818	11.8727	1.64012e-32	3.16588e-30	ENSG00000104765	665	BNIP3L
109	847.454	-2.57717	0.132832	-11.8734	1.62719e-32	3.16588e-30	ENSG00000104738	NA	MCM4
110	211.965	-2.89847	0.159941	-11.8698	1.69817e-32	3.24814e-30	ENSG00000136492	83990	BRIP1
111	767.698	2.38842	0.117121	11.8546	2.0361e-32	3.85942e-30	ENSG00000173465	10534	ZNRD2
112	10085	-2.11932	0.0950203	-11.7798	4.95903e-32	9.3159e-30	ENSG00000130402	81	ACTN4
113	268.372	-2.62482	0.13802	-11.7723	5.42082e-32	1.00933e-29	ENSG00000127564	9088	PKMYT1
114	7857.87	1.79004	0.0671497	11.7653	5.89153e-32	1.08735e-29	ENSG00000168374	378	ARF4
115	692.94	2.30933	0.111408	11.7525	6.85311e-32	1.25382e-29	ENSG00000150527	4253	MIA2
116	222.476	-5.57542	0.389347	-11.7515	6.93638e-32	1.25812e-29	ENSG00000125378	652	BMP4
117	510.481	-2.34329	0.114528	-11.729	9.05547e-32	1.62456e-29	ENSG00000113368	4001	LMNB1
118	2231.64	1.967	0.082449	11.7285	9.11111e-32	1.62456e-29	ENSG00000120686	51569	UFM1
119	77.169	-4.23111	0.275784	-11.7161	1.05448e-31	1.86438e-29	ENSG00000249669	NA	CARMN
120	3542.01	-2.37099	0.117209	-11.697	1.32011e-31	2.3146e-29	ENSG00000035403	7414	VCL
121	2410.38	1.99765	0.0852977	11.6961	1.33393e-31	2.31949e-29	ENSG00000094975	51430	SUCO
122	126.433	-3.20772	0.188928	-11.6855	1.5118e-31	2.60724e-29	ENSG00000204682	NA	MIR1915HG
123	752.501	-2.10867	0.09524	-11.6408	2.55732e-31	4.37447e-29	ENSG00000183963	6525	SMTN
124	299.342	3.06313	0.177526	11.6216	3.2024e-31	5.43375e-29	ENSG00000146409	116843	SLC18B1
125	626.071	2.45957	0.125922	11.5911	4.57393e-31	7.69883e-29	ENSG00000163818	54585	LZTFL1
126	593.169	-2.5784	0.136243	-11.5852	4.90027e-31	8.18267e-29	ENSG00000156802	29028	ATAD2
127	784.369	-2.43275	0.1239	-11.5637	6.29106e-31	1.04223e-28	ENSG00000196787	8969	H2AC11
128	98.9207	-3.63344	0.229239	-11.4877	1.52068e-30	2.49962e-28	ENSG00000130176	1264	CNN1
129	1079.47	-2.44502	0.125797	-11.4869	1.5348e-30	2.50327e-28	ENSG00000196923	9260	PDLIM7
130	911.985	2.11144	0.0969728	11.4614	2.06152e-30	3.33649e-28	ENSG00000244405	NA	ETV5
131	3096.39	1.94554	0.0825348	11.4563	2.18697e-30	3.51251e-28	ENSG00000118217	22926	ATF6
132	1159.39	-2.32543	0.116848	-11.3432	8.01402e-30	1.27739e-27	ENSG00000188486	3014	H2AX
133	321.393	-2.73864	0.153391	-11.3347	8.8368e-30	1.39794e-27	ENSG00000198796	115701	ALPK2
134	1225.82	2.04805	0.0926044	11.3175	1.07506e-29	1.68801e-27	ENSG00000156502	6832	SUPV3L1
135	1168.34	2.01303	0.0895219	11.316	1.09303e-29	1.70351e-27	ENSG00000128335	23780	APOL2
136	64.4332	-4.85179	0.340636	-11.3076	1.2029e-29	1.86095e-27	ENSG00000211448	1734	DIO2
137	204.275	4.13819	0.277642	11.303	1.26792e-29	1.94723e-27	ENSG00000206077	653082	ZDHHC11B
138	793.88	-2.233	0.109481	-11.2623	2.01501e-29	3.07215e-27	ENSG00000117632	3925	STMN1
139	963.006	-2.46975	0.130557	-11.2576	2.12503e-29	3.2166e-27	ENSG00000166851	5347	PLK1
140	187.619	-2.77625	0.157953	-11.2454	2.43962e-29	3.6664e-27	ENSG00000123374	1017	CDK2
141	2034.61	2.02781	0.0914355	11.2408	2.5712e-29	3.83674e-27	ENSG00000107175	NA	CREB3
142	1136.24	1.97202	0.086633	11.22	3.25299e-29	4.81992e-27	ENSG00000179119	144108	SPTY2D1
143	401.51	-2.67571	0.14949	-11.2095	3.66295e-29	5.38941e-27	ENSG00000162063	899	CCNF
144	1260.97	2.00158	0.0893972	11.2037	3.91129e-29	5.71483e-27	ENSG00000211460	7247	TSN
145	1187.08	2.11772	0.100301	11.1437	7.68641e-29	1.11533e-26	ENSG00000081307	79876	UBA5
146	1339.06	-1.95748	0.0860271	-11.13	8.96551e-29	1.29202e-26	ENSG00000167552	7846	TUBA1A
147	2662.58	-1.92722	0.0836064	-11.0903	1.39874e-28	2.00201e-26	ENSG00000131473	47	ACLY
148	558.336	-2.39375	0.126221	-11.0422	2.39155e-28	3.39988e-26	ENSG00000155816	56776	FMN2
149	254.237	2.98857	0.180674	11.0064	3.56061e-28	5.02787e-26	ENSG00000187266	2057	EPOR
150	307.784	2.8795	0.171135	10.9825	4.63656e-28	6.50355e-26	ENSG00000164953	91147	TMEM67
151	610.707	2.42338	0.129932	10.9548	6.29895e-28	8.77681e-26	ENSG00000114395	11068	CYB561D2
152	196.562	4.27078	0.299019	10.9383	7.55641e-28	1.04597e-25	ENSG00000134548	80763	SPX
153	529.63	-4.52526	0.322361	-10.9358	7.77561e-28	1.06927e-25	ENSG00000117525	2152	F3
154	567.561	2.7012	0.155824	10.9174	9.51528e-28	1.30001e-25	ENSG00000197852	55924	INKA2
155	1614.03	1.9953	0.0912967	10.9018	1.12942e-27	1.52327e-25	ENSG00000135241	50640	PNPLA8
156	370.272	-2.45825	0.133761	-10.9019	1.12903e-27	1.52327e-25	ENSG00000166483	7465	WEE1
157	2422.25	-2.11787	0.102559	-10.8998	1.15486e-27	1.54765e-25	ENSG00000131747	7153	TOP2A
158	1484.45	1.98517	0.0908152	10.8481	2.03588e-27	2.71107e-25	ENSG00000136643	26750	RPS6KC1
159	1607.91	-2.07699	0.0994749	-10.8267	2.57272e-27	3.39364e-25	ENSG00000117519	1266	CNN3
160	1920.87	-2.147	0.105945	-10.8264	2.58072e-27	3.39364e-25	ENSG00000163430	11167	FSTL1
161	240.638	-2.61193	0.148985	-10.8194	2.78629e-27	3.64121e-25	ENSG00000167034	4824	NKX3-1
162	3162.18	1.76809	0.0714044	10.7569	5.49957e-27	7.09883e-25	ENSG00000148358	57720	GPR107
163	1924.57	1.96041	0.0892807	10.7572	5.47901e-27	7.09883e-25	ENSG00000281649	100506710	EBLN3P
164	1180.37	-2.07234	0.0997267	-10.7528	5.75075e-27	7.37779e-25	ENSG00000103489	64131	XYLT1
165	614.964	2.1733	0.10913	10.7513	5.84029e-27	7.44726e-25	ENSG00000119878	9419	CRIPT
166	475.746	-2.27441	0.118566	-10.7485	6.02095e-27	7.63137e-25	ENSG00000104884	2068	ERCC2
167	3598.47	-1.98224	0.091471	-10.7383	6.72754e-27	8.47589e-25	ENSG00000071127	9948	WDR1
168	480.032	-2.22039	0.113726	-10.731	7.28033e-27	9.11775e-25	ENSG00000168502	23255	MTCL1
169	1103.4	-1.91981	0.0858371	-10.7158	8.58056e-27	1.06825e-24	ENSG00000160285	4047	LSS
170	95.3438	-3.52303	0.235696	-10.7046	9.68786e-27	1.19901e-24	ENSG00000156466	NA	GDF6
171	715.16	-1.97401	0.0910035	-10.703	9.85351e-27	1.21239e-24	ENSG00000132780	4678	NASP
172	2416.26	1.96303	0.0901624	10.6811	1.24809e-26	1.52673e-24	ENSG00000242802	9907	AP5Z1
173	158.6	5.21664	0.395183	10.6701	1.40507e-26	1.70882e-24	ENSG00000272405	NA
174	88.2221	-3.51713	0.235937	-10.6686	1.42729e-26	1.72587e-24	ENSG00000269416	104472717	LINC01224
175	426.481	-2.54177	0.144717	-10.6537	1.67491e-26	2.01372e-24	ENSG00000113721	5159	PDGFRB
176	184.16	-2.59995	0.150341	-10.6421	1.8978e-26	2.26874e-24	ENSG00000105011	55723	ASF1B
177	197.222	-2.61072	0.151597	-10.625	2.28092e-26	2.71133e-24	ENSG00000180801	79642	ARSJ
178	101.595	-3.1503	0.20332	-10.5759	3.85355e-26	4.55499e-24	ENSG00000156381	122416	ANKRD9
179	66.658	-4.11408	0.29465	-10.5687	4.16043e-26	4.89024e-24	ENSG00000106003	3955	LFNG
180	871.244	2.10572	0.104913	10.5393	5.68964e-26	6.65055e-24	ENSG00000231074	414777	HCG18
181	118.858	-3.10287	0.199942	-10.5174	7.1819e-26	8.34846e-24	ENSG00000126822	NA	PLEKHG3
182	366.692	-2.63959	0.155945	-10.5139	7.45613e-26	8.61961e-24	ENSG00000185340	10634	GAS2L1
183	69.9615	-3.78515	0.265529	-10.489	9.701e-26	1.11535e-23	ENSG00000131914	79727	LIN28A
184	839.895	2.08003	0.103205	10.4649	1.25269e-25	1.43242e-23	ENSG00000100647	NA	SUSD6
185	529.291	2.25569	0.120042	10.4605	1.3122e-25	1.49237e-23	ENSG00000258102	643246	MAP1LC3B2
186	168.95	-2.61246	0.154217	-10.4558	1.37887e-25	1.55976e-23	ENSG00000092470	79968	WDR76
187	1467.64	1.91401	0.0874567	10.451	1.44946e-25	1.63084e-23	ENSG00000012822	57658	CALCOCO1
188	285.087	-4.05932	0.292881	-10.4456	1.53454e-25	1.71738e-23	ENSG00000139292	8549	LGR5
189	162.521	-2.81464	0.173756	-10.4436	1.56795e-25	1.74549e-23	ENSG00000065328	55388	MCM10
190	189.854	4.09709	0.29663	10.4409	1.61203e-25	1.78511e-23	ENSG00000214866	728597	DCDC2C
191	891.85	2.18086	0.113131	10.4379	1.66449e-25	1.83355e-23	ENSG00000113811	NA	SELENOK
192	254.713	-2.69142	0.162181	-10.4292	1.82457e-25	1.99942e-23	ENSG00000101447	81610	FAM83D
193	634.037	2.17528	0.112753	10.4235	1.93644e-25	2.11102e-23	ENSG00000143457	55204	GOLPH3L
194	797.487	-2.07097	0.102791	-10.4189	2.03204e-25	2.20382e-23	ENSG00000270276	554313	H4C15
195	253.883	-2.39251	0.133889	-10.4005	2.46731e-25	2.66216e-23	ENSG00000122952	11130	ZWINT
196	826.348	1.99951	0.096417	10.3666	3.51918e-25	3.77773e-23	ENSG00000197780	6884	TAF13
197	77.9493	-3.46511	0.238626	-10.3304	5.13332e-25	5.48249e-23	ENSG00000273760	NA
198	6317.39	-2.01791	0.0985704	-10.3267	5.33526e-25	5.66939e-23	ENSG00000177469	284119	CAVIN1
199	1586.03	2.09722	0.106346	10.3174	5.87752e-25	6.21422e-23	ENSG00000196505	NA	GDAP2
200	145.939	-2.93465	0.187547	-10.3156	5.99106e-25	6.30259e-23	ENSG00000149596	57158	JPH2
201	1134.19	2.05359	0.102233	10.3058	6.63489e-25	6.94518e-23	ENSG00000198753	5365	PLXNB3
202	5319.12	-1.74058	0.0719245	-10.2966	7.29747e-25	7.60093e-23	ENSG00000169710	2194	FASN
203	310.857	-2.49334	0.14518	-10.2861	8.13958e-25	8.43629e-23	ENSG00000102781	84056	KATNAL1
204	262.796	-2.34422	0.130746	-10.2812	8.56918e-25	8.83801e-23	ENSG00000135821	2752	GLUL
205	179.116	-2.61226	0.157164	-10.2584	1.08446e-24	1.11302e-22	ENSG00000167081	5090	PBX3
206	384.159	-2.37919	0.134733	-10.2365	1.36125e-24	1.39033e-22	ENSG00000090924	64857	PLEKHG2
207	531.571	2.29257	0.126281	10.2357	1.37248e-24	1.39502e-22	ENSG00000162910	128308	MRPL55
208	1476.05	1.8219	0.0803231	10.2324	1.42018e-24	1.43657e-22	ENSG00000170581	6773	STAT2
209	310.134	-4.22673	0.317134	-10.1747	2.57286e-24	2.59009e-22	ENSG00000061337	11178	LZTS1
210	231.237	-2.54581	0.152329	-10.1478	3.38813e-24	3.39458e-22	ENSG00000198467	7169	TPM2
211	155.745	-3.00057	0.197401	-10.1346	3.88118e-24	3.87014e-22	ENSG00000162614	91624	NEXN
212	1248.07	2.2006	0.118876	10.0996	5.54497e-24	5.50312e-22	ENSG00000179094	5187	PER1
213	1764.2	-2.20902	0.11989	-10.0844	6.47746e-24	6.39839e-22	ENSG00000169213	5865	RAB3B
214	353.872	2.83349	0.182019	10.0731	7.2684e-24	7.14613e-22	ENSG00000135116	8739	HRK
215	241.932	-2.33535	0.132593	-10.0711	7.41759e-24	7.25889e-22	ENSG00000167693	64359	NXN
216	472.353	-2.34302	0.133398	-10.0678	7.66703e-24	7.46826e-22	ENSG00000272398	100133941	CD24
217	2737.19	-2.89722	0.188482	-10.0658	7.82498e-24	7.58698e-22	ENSG00000122786	800	CALD1
218	292.819	2.79435	0.178318	10.0626	8.08089e-24	7.79917e-22	ENSG00000168038	54986	ULK4
219	182.506	3.43815	0.24234	10.0609	8.22527e-24	7.90227e-22	ENSG00000237596	NA
220	978.335	1.95025	0.0944918	10.0564	8.6075e-24	8.2319e-22	ENSG00000167112	26995	TRUB2
221	700.94	1.95686	0.0953166	10.0387	1.03012e-23	9.8071e-22	ENSG00000081177	55218	EXD2
222	307.736	-2.46048	0.145595	-10.0311	1.11238e-23	1.05426e-21	ENSG00000172159	257019	FRMD3
223	316.195	-2.3951	0.139192	-10.0229	1.20916e-23	1.14084e-21	ENSG00000170312	983	CDK1
224	1333.84	-1.94022	0.0938281	-10.0207	1.23611e-23	1.16106e-21	ENSG00000176014	84617	TUBB6
225	369.734	-2.42612	0.142691	-9.99446	1.61158e-23	1.50701e-21	ENSG00000047936	6098	ROS1
226	2555.63	-1.77331	0.0774953	-9.97876	1.88821e-23	1.75787e-21	ENSG00000167553	84790	TUBA1C
227	176.368	3.38161	0.238693	9.9777	1.9083e-23	1.76875e-21	ENSG00000119636	NA	BBOF1
228	63.1134	-3.78632	0.279357	-9.97405	1.97978e-23	1.82695e-21	ENSG00000142910	64129	TINAGL1
229	2173.19	1.80484	0.0807159	9.9713	2.03554e-23	1.8702e-21	ENSG00000144747	NA	TMF1
230	2853.34	1.88294	0.0885817	9.96749	2.11503e-23	1.93479e-21	ENSG00000214655	23053	ZSWIM8
231	645.837	2.21758	0.122517	9.93805	2.84325e-23	2.5897e-21	ENSG00000047346	56204	FAM214A
232	647.515	2.00327	0.101062	9.92727	3.16802e-23	2.87306e-21	ENSG00000205629	51451	LCMT1
233	231.201	2.99759	0.201345	9.92121	3.3666e-23	3.04005e-21	ENSG00000234465	390940	PINLYP
234	1514.83	1.89316	0.0902897	9.89219	4.50086e-23	4.04693e-21	ENSG00000179562	NA	GCC1
235	5094.78	1.69989	0.0710685	9.84806	6.98829e-23	6.25675e-21	ENSG00000173230	2804	GOLGB1
236	164.094	-4.84896	0.390908	-9.84621	7.11786e-23	6.34575e-21	ENSG00000189057	374393	FAM111B
237	74.4059	-3.48036	0.252484	-9.82383	8.89022e-23	7.89242e-21	ENSG00000144354	83879	CDCA7
238	900.387	-2.13605	0.115881	-9.80362	1.08619e-22	9.60225e-21	ENSG00000203811	126961	H3C14
239	1682.81	2.22016	0.124627	9.79048	1.23711e-22	1.08907e-20	ENSG00000167797	10263	CDK2AP2
240	1642.29	-1.78029	0.0797433	-9.78506	1.30515e-22	1.14418e-20	ENSG00000198911	6721	SREBF2
241	518.811	2.22344	0.125047	9.78387	1.32058e-22	1.15291e-20	ENSG00000197779	347344	ZNF81
242	466.962	-2.09028	0.111449	-9.78276	1.33515e-22	1.16081e-20	ENSG00000135476	9700	ESPL1
243	249.07	-2.50128	0.153494	-9.7807	1.36268e-22	1.17987e-20	ENSG00000078053	273	AMPH
244	910.286	-1.99642	0.10191	-9.7775	1.40643e-22	1.21276e-20	ENSG00000187098	4286	MITF
245	155.599	-2.80015	0.184157	-9.77506	1.44074e-22	1.23727e-20	ENSG00000101412	1869	E2F1
246	72401.9	-2.0081	0.103338	-9.75536	1.74978e-22	1.49656e-20	ENSG00000075624	60	ACTB
247	1616.31	1.97138	0.0996265	9.7502	1.84111e-22	1.5683e-20	ENSG00000154832	30827	CXXC1
248	662.864	-2.94281	0.199843	-9.7217	2.43676e-22	2.06732e-20	ENSG00000105971	858	CAV2
249	164.145	3.55244	0.263051	9.70321	2.92166e-22	2.46874e-20	ENSG00000188266	123688	HYKK
250	1017.66	-2.01298	0.104479	-9.69547	3.15184e-22	2.65259e-20	ENSG00000170540	23204	ARL6IP1
251	197.614	3.59613	0.268223	9.67899	3.70351e-22	3.10446e-20	ENSG00000092929	201294	UNC13D
252	1383.98	-2.05525	0.10916	-9.66707	4.1611e-22	3.47419e-20	ENSG00000118985	22936	ELL2
253	2806.69	-2.01361	0.104931	-9.65981	4.46701e-22	3.71486e-20	ENSG00000106211	3315	HSPB1
254	369.973	-2.36775	0.142132	-9.62312	6.3866e-22	5.29032e-20	ENSG00000188549	388115	CCDC9B
255	431.162	2.23233	0.128071	9.62231	6.43701e-22	5.31117e-20	ENSG00000155275	NA	TRMT44
256	409.907	2.45046	0.150875	9.61368	6.99993e-22	5.75307e-20	ENSG00000150977	196383	RILPL2
257	150.77	-2.60104	0.166571	-9.61173	7.1342e-22	5.8406e-20	ENSG00000165244	NA	ZNF367
258	276.084	2.55563	0.162269	9.58676	9.08946e-22	7.41249e-20	ENSG00000113108	10307	APBB3
259	194.127	2.83839	0.191859	9.58197	9.52074e-22	7.73422e-20	ENSG00000206530	55779	CFAP44
260	597.863	2.15109	0.120693	9.5374	1.4646e-21	1.1852e-19	ENSG00000168701	29100	TMEM208
261	2545.35	-2.08043	0.113322	-9.53415	1.51117e-21	1.21355e-19	ENSG00000151835	26278	SACS
262	812.167	-1.94036	0.0986299	-9.53425	1.50968e-21	1.21355e-19	ENSG00000070404	NA	FSTL3
263	665.515	2.16208	0.121957	9.52861	1.59409e-21	1.27527e-19	ENSG00000125459	55154	MSTO1
264	811.865	-1.88018	0.0923877	-9.52698	1.61918e-21	1.29043e-19	ENSG00000112984	10112	KIF20A
265	1373.73	1.82895	0.0871141	9.51572	1.80453e-21	1.43273e-19	ENSG00000164934	25879	DCAF13
266	1550.56	-1.82383	0.0866613	-9.50637	1.97436e-21	1.56168e-19	ENSG00000176619	84823	LMNB2
267	435.373	-2.03478	0.108982	-9.49491	2.20401e-21	1.7368e-19	ENSG00000101057	4605	MYBL2
268	223.526	-2.60622	0.169432	-9.47999	2.54301e-21	1.99646e-19	ENSG00000125726	970	CD70
269	102.72	-2.80183	0.190245	-9.47111	2.76875e-21	2.16559e-19	ENSG00000007968	1870	E2F2
270	1050.68	-2.06435	0.112483	-9.46229	3.01284e-21	2.34778e-19	ENSG00000136108	26586	CKAP2
271	1206.03	1.96607	0.102201	9.45263	3.30427e-21	2.56538e-19	ENSG00000012171	7869	SEMA3B
272	284.469	-2.32575	0.140313	-9.44853	3.43622e-21	2.65802e-19	ENSG00000176890	7298	TYMS
273	514.08	-3.27155	0.240585	-9.4418	3.66447e-21	2.82419e-19	ENSG00000276043	29128	UHRF1
274	122.693	-2.9718	0.208868	-9.4404	3.71354e-21	2.85157e-19	ENSG00000107796	59	ACTA2
275	1479.31	1.86744	0.0919012	9.43889	3.76763e-21	2.88258e-19	ENSG00000164597	10466	COG5
276	45.4237	-4.30199	0.34998	-9.43481	3.91698e-21	2.98599e-19	ENSG00000196155	25894	PLEKHG4
277	340.942	-2.16249	0.123228	-9.43361	3.9622e-21	3.00956e-19	ENSG00000187210	2650	GCNT1
278	668.86	2.19858	0.12725	9.41911	4.54908e-21	3.4429e-19	ENSG00000198300	5178	PEG3
279	24469.1	-2.52064	0.161469	-9.41752	4.61869e-21	3.48306e-19	ENSG00000184009	71	ACTG1
280	1423.04	1.74425	0.0790395	9.41617	4.67854e-21	3.51559e-19	ENSG00000151694	6868	ADAM17
281	1237.43	-1.95189	0.101173	-9.40848	5.03343e-21	3.7688e-19	ENSG00000146674	3486	IGFBP3
282	1574.86	-1.81527	0.0869198	-9.37957	6.62424e-21	4.94234e-19	ENSG00000153904	23576	DDAH1
283	2715.46	2.07621	0.11482	9.37297	7.05213e-21	5.24299e-19	ENSG00000162298	84447	SYVN1
284	567.475	-2.3004	0.138842	-9.36606	7.5292e-21	5.57797e-19	ENSG00000115325	1796	DOK1
285	5889.95	1.56444	0.0603385	9.35452	8.39805e-21	6.19983e-19	ENSG00000136628	2058	EPRS1
286	892.092	-2.76146	0.188354	-9.35191	8.60822e-21	6.33276e-19	ENSG00000171435	283455	KSR2
287	3260.84	1.77217	0.0825729	9.35138	8.65116e-21	6.34217e-19	ENSG00000055483	57602	USP36
288	634.231	-1.94076	0.100735	-9.33893	9.73132e-21	7.10927e-19	ENSG00000171793	1503	CTPS1
289	444.921	-2.14074	0.122184	-9.33626	9.98002e-21	7.26573e-19	ENSG00000286522	8358	H3C2
290	300.957	-2.34938	0.144955	-9.30894	1.29114e-20	9.36748e-19	ENSG00000141858	90378	SAMD1
291	115.676	4.98502	0.428312	9.30401	1.35245e-20	9.77852e-19	ENSG00000184949	646851	FAM227A
292	59.0424	-3.54517	0.275788	-9.22872	2.73892e-20	1.97352e-18	ENSG00000169174	255738	PCSK9
293	2139.06	-1.96688	0.104774	-9.22827	2.75032e-20	1.97497e-18	ENSG00000159335	5763	PTMS
294	247.749	2.57477	0.170811	9.21937	2.98839e-20	2.13863e-18	ENSG00000140678	3687	ITGAX
295	1769.82	1.82161	0.0891687	9.21416	3.13728e-20	2.23757e-18	ENSG00000179918	22928	SEPHS2
296	100.443	-3.0457	0.22216	-9.2082	3.31632e-20	2.35728e-18	ENSG00000169994	4648	MYO7B
297	317.226	2.38483	0.150569	9.19731	3.67006e-20	2.59993e-18	ENSG00000179454	54813	KLHL28
298	461.008	-2.1035	0.120075	-9.19002	3.92783e-20	2.77321e-18	ENSG00000137124	219	ALDH1B1
299	127.993	-2.72886	0.188568	-9.16837	4.80245e-20	3.37938e-18	ENSG00000122694	152007	GLIPR2
300	563.873	-1.86943	0.0948443	-9.16695	4.866e-20	3.41269e-18	ENSG00000075218	51512	GTSE1
301	489.937	2.10773	0.121224	9.13784	6.37147e-20	4.44139e-18	ENSG00000154814	92106	OXNAD1
302	62.0768	-3.50738	0.274397	-9.13778	6.37499e-20	4.44139e-18	ENSG00000127863	55504	TNFRSF19
303	4509.98	-1.77644	0.0851382	-9.11972	7.53155e-20	5.22983e-18	ENSG00000075618	6624	FSCN1
304	374.753	2.2359	0.135818	9.09967	9.06079e-20	6.27102e-18	ENSG00000170689	3219	HOXB9
305	1042.68	1.82259	0.0905427	9.08506	1.0364e-19	7.14949e-18	ENSG00000125812	64412	GZF1
306	691.553	2.1481	0.126385	9.08418	1.04481e-19	7.18392e-18	ENSG00000164615	819	CAMLG
307	730.027	-2.06946	0.117871	-9.07313	1.1565e-19	7.92597e-18	ENSG00000146072	NA	TNFRSF21
308	626.746	2.08593	0.119708	9.07147	1.1742e-19	8.02113e-18	ENSG00000163683	201895	SMIM14
309	218.36	-2.32878	0.146514	-9.06931	1.19772e-19	8.12901e-18	ENSG00000121753	576	ADGRB2
310	684.011	-2.12596	0.124149	-9.06947	1.19594e-19	8.12901e-18	ENSG00000127946	3092	HIP1
311	259.186	-2.35704	0.149636	-9.06893	1.20191e-19	8.13122e-18	ENSG00000043143	23338	JADE2
312	18922.4	1.67529	0.0744716	9.06773	1.21526e-19	8.19518e-18	ENSG00000185624	5034	P4HB
313	759.606	1.93937	0.103679	9.06042	1.29944e-19	8.73492e-18	ENSG00000105856	26959	HBP1
314	2085.21	1.78073	0.0862061	9.05651	1.3469e-19	9.0251e-18	ENSG00000162695	148867	SLC30A7
315	394.931	-2.14984	0.127045	-9.05063	1.42145e-19	9.49442e-18	ENSG00000180340	2535	FZD2
316	1017.64	1.80514	0.0889791	9.04865	1.44746e-19	9.63752e-18	ENSG00000119523	NA	ALG2
317	68.959	-3.24293	0.24808	-9.04116	1.55023e-19	1.02892e-17	ENSG00000183454	2903	GRIN2A
318	554.565	-2.06839	0.118345	-9.02775	1.75237e-19	1.15943e-17	ENSG00000115641	2274	FHL2
319	2018.43	-3.26192	0.251186	-9.00493	2.15809e-19	1.42339e-17	ENSG00000136153	4008	LMO7
320	1411.54	1.72645	0.0810341	8.96479	3.10876e-19	2.04401e-17	ENSG00000120805	400	ARL1
321	246.822	-2.45191	0.162027	-8.96092	3.21966e-19	2.11033e-17	ENSG00000204131	340527	NHSL2
322	2521.09	1.73104	0.0816449	8.95385	3.43305e-19	2.24321e-17	ENSG00000067369	7158	TP53BP1
323	760.602	1.88974	0.0995221	8.94014	3.88665e-19	2.53174e-17	ENSG00000187792	NA	ZNF70
324	483.877	-2.02462	0.114657	-8.93639	4.02086e-19	2.61107e-17	ENSG00000119403	26147	PHF19
325	1366.82	1.80384	0.0900187	8.92971	4.27128e-19	2.76516e-17	ENSG00000121749	64786	TBC1D15
326	105.393	-2.81589	0.20362	-8.918	4.74795e-19	3.06432e-17	ENSG00000276903	8332	H2AC16
327	4494.88	-1.74033	0.0830885	-8.9102	5.09396e-19	3.27758e-17	ENSG00000159840	7791	ZYX
328	769.838	2.36909	0.153783	8.90276	5.44756e-19	3.49441e-17	ENSG00000162772	467	ATF3
329	1416.3	-3.45327	0.275596	-8.90171	5.49927e-19	3.51686e-17	ENSG00000145632	10769	PLK2
330	124.785	-2.64175	0.184597	-8.89371	5.90992e-19	3.76802e-17	ENSG00000170577	10736	SIX2
331	677.805	1.97691	0.110117	8.8716	7.21034e-19	4.58325e-17	ENSG00000126947	51309	ARMCX1
332	2052.87	-2.00098	0.112889	-8.86696	7.51717e-19	4.76389e-17	ENSG00000114019	51421	AMOTL2
333	301.394	-2.32862	0.150049	-8.85453	8.4038e-19	5.30979e-17	ENSG00000145431	56034	PDGFC
334	253.304	2.42859	0.161457	8.84811	8.9012e-19	5.60722e-17	ENSG00000240024	100505687	LINC00888
335	120.039	-2.63698	0.185252	-8.83647	9.87867e-19	6.2044e-17	ENSG00000169258	NA	GPRIN1
336	3936.47	-3.18279	0.247219	-8.82939	1.05248e-18	6.59053e-17	ENSG00000105974	857	CAV1
337	339.309	-2.0805	0.122591	-8.81387	1.20902e-18	7.54833e-17	ENSG00000140848	221184	CPNE2
338	834.453	-2.00765	0.114398	-8.8083	1.27058e-18	7.90915e-17	ENSG00000090530	55214	P3H2
339	7243.21	-1.54836	0.0623779	-8.79097	1.48273e-18	9.20257e-17	ENSG00000072110	87	ACTN1
340	771.553	1.91573	0.104209	8.78744	1.53003e-18	9.46816e-17	ENSG00000173875	163049	ZNF791
341	750.77	-2.15709	0.131828	-8.77729	1.67467e-18	1.03027e-16	ENSG00000144583	NA	MARCHF4
342	750.389	-1.79223	0.0902588	-8.7773	1.67446e-18	1.03027e-16	ENSG00000177084	5426	POLE
343	378.736	-2.29326	0.147503	-8.76773	1.82299e-18	1.11824e-16	ENSG00000074590	9891	NUAK1
344	740.645	1.91099	0.103978	8.76136	1.92909e-18	1.17989e-16	ENSG00000112343	10475	TRIM38
345	871.383	1.91303	0.104302	8.7538	2.0629e-18	1.25807e-16	ENSG00000160570	162989	DEDD2
346	455.814	2.26984	0.145165	8.74755	2.18042e-18	1.3259e-16	ENSG00000178607	2081	ERN1
347	1097.38	1.80047	0.0915143	8.74697	2.1915e-18	1.32879e-16	ENSG00000125952	4149	MAX
348	222.007	2.38678	0.158621	8.74271	2.27582e-18	1.37595e-16	ENSG00000184194	54328	GPR173
349	593.846	-2.19018	0.136171	-8.74038	2.32338e-18	1.40068e-16	ENSG00000112297	202	CRYBG1
350	689.528	-1.84887	0.0972488	-8.72889	2.57185e-18	1.54605e-16	ENSG00000132561	4147	MATN2
351	878.192	-1.94309	0.10805	-8.72823	2.58682e-18	1.55062e-16	ENSG00000122966	11113	CIT
352	272.63	-2.18826	0.136503	-8.70504	3.1745e-18	1.89749e-16	ENSG00000102384	2491	CENPI
353	602.951	2.06071	0.122016	8.69323	3.52284e-18	2.09973e-16	ENSG00000051009	84067	FHIP1B
354	154.681	-2.41415	0.162861	-8.68319	3.84829e-18	2.28723e-16	ENSG00000148384	56623	INPP5E
355	537.114	2.20425	0.138911	8.6692	4.3515e-18	2.57903e-16	ENSG00000215154	652276
356	120.214	3.70777	0.31239	8.66792	4.4008e-18	2.60092e-16	ENSG00000166257	55800	SCN3B
357	876.374	1.82945	0.0957165	8.66567	4.48884e-18	2.64553e-16	ENSG00000150593	27250	PDCD4
358	66.9526	-3.15816	0.249099	-8.66389	4.55952e-18	2.67967e-16	ENSG00000113578	2246	FGF1
359	168.211	2.77279	0.205113	8.643	5.47553e-18	3.20906e-16	ENSG00000198814	2710	GK
360	659.828	-2.02681	0.118816	-8.642	5.52375e-18	3.22833e-16	ENSG00000126705	27245	AHDC1
361	215.466	-3.70441	0.313033	-8.6394	5.6511e-18	3.2936e-16	ENSG00000205213	55366	LGR4
362	103.755	-2.93751	0.224338	-8.63654	5.79411e-18	3.36763e-16	ENSG00000049246	8863	PER3
363	949.847	3.73397	0.31751	8.61063	7.26578e-18	4.21135e-16	ENSG00000250746	NA
364	136.09	6.25436	0.612184	8.58298	9.245e-18	5.33996e-16	ENSG00000130294	547	KIF1A
365	325.846	-3.73988	0.319232	-8.58274	9.26372e-18	5.33996e-16	ENSG00000273703	8342	H2BC14
366	470.347	2.08053	0.126104	8.56853	1.0481e-17	6.02517e-16	ENSG00000145362	287	ANK2
367	3510.08	-1.94634	0.110658	-8.55187	1.2111e-17	6.94322e-16	ENSG00000083857	2195	FAT1
368	2696.7	-1.69664	0.0815363	-8.54397	1.29683e-17	7.41446e-16	ENSG00000099194	6319	SCD
369	299.244	-2.32162	0.154758	-8.53997	1.34256e-17	7.65515e-16	ENSG00000128849	84952	CGNL1
370	442.049	-2.03767	0.121567	-8.53579	1.39204e-17	7.91584e-16	ENSG00000154864	63895	PIEZO2
371	1152.56	1.76632	0.0897911	8.5345	1.40769e-17	7.98322e-16	ENSG00000117475	8548	BLZF1
372	280.801	2.33126	0.156261	8.51947	1.60288e-17	9.06576e-16	ENSG00000132639	6616	SNAP25
373	30370.3	-2.42321	0.167089	-8.51766	1.62811e-17	9.15921e-16	ENSG00000124942	79026	AHNAK
374	425.705	-2.0972	0.128813	-8.5178	1.62611e-17	9.15921e-16	ENSG00000127334	8445	DYRK2
375	47.5221	-3.83283	0.332824	-8.51149	1.71708e-17	9.63394e-16	ENSG00000179300	203430	RTL3
376	36.9556	-4.38709	0.397999	-8.51028	1.73518e-17	9.70963e-16	ENSG00000164161	64399	HHIP
377	200.97	2.95227	0.229583	8.50356	1.83871e-17	1.02617e-15	ENSG00000260852	283932	FBXL19-AS1
378	2757.79	1.7497	0.0881832	8.50166	1.86894e-17	1.04028e-15	ENSG00000077232	54431	DNAJC10
379	173.329	-2.31295	0.154642	-8.49029	2.06114e-17	1.14423e-15	ENSG00000203989	727940	RHOXF2B
380	159.556	2.76372	0.207869	8.4848	2.16088e-17	1.19645e-15	ENSG00000178146	NA	GK4P
381	254.576	-2.2494	0.147262	-8.48422	2.1718e-17	1.19933e-15	ENSG00000160949	4796	TONSL
382	1889.52	-2.71902	0.202645	-8.48289	2.19673e-17	1.20992e-15	ENSG00000050405	51474	LIMA1
383	91.4658	-2.77796	0.209969	-8.46774	2.50196e-17	1.37444e-15	ENSG00000169683	201255	LRRC45
384	37.4247	-4.10995	0.367416	-8.46438	2.57529e-17	1.41104e-15	ENSG00000265763	118738	ZNF488
385	3633.01	-1.84421	0.0997715	-8.46142	2.64147e-17	1.44355e-15	ENSG00000117724	1063	CENPF
386	206.347	2.54789	0.183392	8.44034	3.16418e-17	1.72473e-15	ENSG00000165521	161436	EML5
387	2780.84	-2.49315	0.177041	-8.43387	3.34413e-17	1.8181e-15	ENSG00000091986	151887	CCDC80
388	547.717	2.07284	0.127277	8.42916	3.48151e-17	1.88791e-15	ENSG00000178381	90637	ZFAND2A
389	1747.66	1.7137	0.0847042	8.42581	3.5827e-17	1.93431e-15	ENSG00000204351	6499	SKIV2L
390	1206.68	1.76255	0.0905032	8.42572	3.58546e-17	1.93431e-15	ENSG00000183117	64478	CSMD1
391	814.761	-1.81377	0.096745	-8.41146	4.04954e-17	2.17909e-15	ENSG00000128245	NA	YWHAH
392	1917.54	1.60898	0.0724829	8.4017	4.40067e-17	2.36199e-15	ENSG00000110619	833	CARS1
393	450.079	2.03853	0.123707	8.39507	4.65631e-17	2.49284e-15	ENSG00000175764	158135	TTLL11
394	359.547	2.10503	0.131674	8.39212	4.7746e-17	2.54968e-15	ENSG00000260916	9236	CCPG1
395	658.866	-2.00361	0.119779	-8.37891	5.34203e-17	2.84548e-15	ENSG00000171055	9637	FEZ2
396	792.909	-2.00011	0.119429	-8.37406	5.56654e-17	2.95757e-15	ENSG00000176788	10409	BASP1
397	410.734	-3.13189	0.254938	-8.36238	6.14655e-17	3.25752e-15	ENSG00000170390	166614	DCLK2
398	233.603	2.30211	0.15574	8.36078	6.23023e-17	3.29357e-15	ENSG00000119328	54942	ABITRAM
399	2731.44	1.55476	0.0664167	8.35273	6.67046e-17	3.50866e-15	ENSG00000059573	5832	ALDH18A1
400	233.857	-2.41596	0.169521	-8.35275	6.66909e-17	3.50866e-15	ENSG00000140557	8128	ST8SIA2
401	661.032	-1.94388	0.113089	-8.34632	7.04234e-17	3.69503e-15	ENSG00000164442	10370	CITED2
402	148.159	2.95325	0.234215	8.33959	7.45513e-17	3.90189e-15	ENSG00000230021	NA
403	474.212	2.14999	0.13807	8.32904	8.15004e-17	4.25501e-15	ENSG00000163877	NA	SNIP1
404	346.885	2.15599	0.13884	8.3261	8.35482e-17	4.35112e-15	ENSG00000185418	NA	TARS3
405	181.873	2.61457	0.194002	8.32244	8.61677e-17	4.47646e-15	ENSG00000156050	NA	FAM161B
406	1122.27	1.70497	0.0847239	8.32075	8.74057e-17	4.5296e-15	ENSG00000166685	9382	COG1
407	1857.79	1.72289	0.0868843	8.32017	8.78373e-17	4.54078e-15	ENSG00000155304	NA	HSPA13
408	941.012	-2.9087	0.229867	-8.30352	1.01075e-16	5.21232e-15	ENSG00000183287	147372	CCBE1
409	92.9839	4.04374	0.367199	8.28906	1.14146e-16	5.87198e-15	ENSG00000204815	83538	ODAD4
410	112.05	5.16916	0.504599	8.26232	1.42867e-16	7.33152e-15	ENSG00000152463	55301	OLAH
411	717.163	1.9465	0.114574	8.26104	1.44415e-16	7.3929e-15	ENSG00000114107	80321	CEP70
412	1118.12	-3.5546	0.309995	-8.24077	1.71108e-16	8.73815e-15	ENSG00000168685	3575	IL7R
413	855.645	1.84326	0.102341	8.23974	1.72591e-16	8.79254e-15	ENSG00000146085	4594	MMUT
414	753.706	-3.80885	0.341591	-8.22286	1.98713e-16	1.00988e-14	ENSG00000092969	7042	TGFB2
415	56.6908	-3.14814	0.261497	-8.21477	2.12577e-16	1.07774e-14	ENSG00000276850	NA
416	348.291	2.12286	0.136816	8.20708	2.26632e-16	1.14623e-14	ENSG00000081803	93664	CADPS2
417	73.4935	-2.94165	0.236869	-8.19714	2.46172e-16	1.24208e-14	ENSG00000160326	11182	SLC2A6
418	2863.23	-1.76699	0.0935961	-8.19464	2.51351e-16	1.26517e-14	ENSG00000173546	1464	CSPG4
419	871.404	-1.83558	0.101985	-8.19314	2.5449e-16	1.27792e-14	ENSG00000149503	3619	INCENP
420	493.234	-1.98193	0.119868	-8.19176	2.57443e-16	1.28967e-14	ENSG00000149591	6876	TAGLN
421	771.955	1.86778	0.105951	8.19042	2.60306e-16	1.30091e-14	ENSG00000135541	54806	AHI1
422	729.68	1.94197	0.11527	8.17183	3.03756e-16	1.51446e-14	ENSG00000172375	9854	C2CD2L
423	766.897	1.8908	0.109089	8.16583	3.19243e-16	1.58791e-14	ENSG00000141446	114799	ESCO1
424	779.397	1.91297	0.111841	8.16314	3.26421e-16	1.61979e-14	ENSG00000147905	84186	ZCCHC7
425	2176.19	1.61489	0.075338	8.16174	3.30243e-16	1.6349e-14	ENSG00000088205	NA	DDX18
426	1602.59	1.63474	0.0778767	8.15061	3.62081e-16	1.78831e-14	ENSG00000020129	23154	NCDN
427	561.757	-3.05678	0.252602	-8.14236	3.8764e-16	1.91006e-14	ENSG00000118523	1490	CCN2
428	349.622	-2.00827	0.12385	-8.14103	3.91919e-16	1.92663e-14	ENSG00000072195	10290	SPEG
429	395.481	2.03563	0.12732	8.13409	4.15044e-16	2.03555e-14	ENSG00000120519	84068	SLC10A7
430	12164.1	1.45677	0.0561913	8.12881	4.33511e-16	2.12118e-14	ENSG00000106105	2617	GARS1
431	254.477	10.6121	1.18361	8.12103	4.62244e-16	2.25652e-14	ENSG00000130487	113730	KLHDC7B
432	166.143	-2.46259	0.180307	-8.11168	4.9926e-16	2.43158e-14	ENSG00000112183	221662	RBM24
433	4135.09	-2.97158	0.243323	-8.10273	5.37399e-16	2.61129e-14	ENSG00000140416	7168	TPM1
434	313.424	-2.16707	0.144073	-8.1006	5.46907e-16	2.65137e-14	ENSG00000125520	NA	SLC2A4RG
435	478.089	-2.05833	0.130683	-8.09847	5.56547e-16	2.69189e-14	ENSG00000198604	11177	BAZ1A
436	138.261	-2.39797	0.172646	-8.09731	5.61855e-16	2.71134e-14	ENSG00000159259	8208	CHAF1B
437	86.5012	4.6316	0.448592	8.09557	5.69983e-16	2.74427e-14	ENSG00000132692	63827	BCAN
438	58.3451	-3.11778	0.261722	-8.09173	5.88217e-16	2.82559e-14	ENSG00000204176	83849	SYT15
439	365.059	2.34517	0.166587	8.07487	6.75512e-16	3.23753e-14	ENSG00000160469	84446	BRSK1
440	414.989	-1.92582	0.115234	-8.03428	9.413e-16	4.50112e-14	ENSG00000185215	7127	TNFAIP2
441	759.931	-1.90156	0.112243	-8.0322	9.5738e-16	4.56764e-14	ENSG00000115355	55704	CCDC88A
442	641.897	1.85663	0.106671	8.03056	9.70319e-16	4.61889e-14	ENSG00000213523	10011	SRA1
443	1761.56	1.64856	0.0808582	8.0209	1.04973e-15	4.98562e-14	ENSG00000068912	27248	ERLEC1
444	579.663	1.9274	0.115636	8.02002	1.05726e-15	5.01007e-14	ENSG00000109270	8649	LAMTOR3
445	60.5041	-3.17145	0.27105	-8.01125	1.13549e-15	5.36868e-14	ENSG00000170989	1901	S1PR1
446	1127.3	-2.45634	0.182053	-7.99957	1.24857e-15	5.89011e-14	ENSG00000197747	6281	S100A10
447	1028.34	-2.928	0.241173	-7.99428	1.30336e-15	6.13221e-14	ENSG00000013588	9052	GPRC5A
448	93.8724	4.30098	0.412929	7.99405	1.30572e-15	6.13221e-14	ENSG00000160181	7032	TFF2
449	1814.02	-1.64745	0.0809992	-7.99326	1.31413e-15	6.15797e-14	ENSG00000075340	119	ADD2
450	1236.83	1.70616	0.0884411	7.98453	1.41055e-15	6.5951e-14	ENSG00000138942	91445	RNF185
451	191.177	2.48783	0.186578	7.97433	1.53214e-15	7.14771e-14	ENSG00000103021	29070	CCDC113
452	684.952	-2.76074	0.220844	-7.97277	1.55161e-15	7.22253e-14	ENSG00000140937	1009	CDH11
453	386.928	2.01019	0.126734	7.97098	1.57416e-15	7.31133e-14	ENSG00000198466	84914	ZNF587
454	277.389	-2.08377	0.136099	-7.96311	1.67769e-15	7.775e-14	ENSG00000203852	333932	H3C15
455	4518.98	1.73107	0.0919734	7.94868	1.88507e-15	8.7169e-14	ENSG00000154305	375056	MIA3
456	1226.36	-2.77472	0.223466	-7.94176	1.99328e-15	9.19708e-14	ENSG00000164465	285761	DCBLD1
457	628.343	-2.10605	0.139339	-7.93784	2.05731e-15	9.47172e-14	ENSG00000158321	26053	AUTS2
458	88.2127	-2.83959	0.231813	-7.93566	2.09371e-15	9.61829e-14	ENSG00000274641	8348	H2BC17
459	1380.65	-2.48041	0.186627	-7.93245	2.14863e-15	9.84904e-14	ENSG00000076513	88455	ANKRD13A
460	76.414	3.67563	0.337367	7.93093	2.17517e-15	9.94902e-14	ENSG00000130829	1852	DUSP9
461	1803.18	1.69917	0.0881982	7.92724	2.24067e-15	1.02264e-13	ENSG00000083520	22894	DIS3
462	66.9497	-2.86134	0.234819	-7.92668	2.2508e-15	1.02504e-13	ENSG00000074219	8463	TEAD2
463	864.51	1.83717	0.105633	7.92525	2.27691e-15	1.03246e-13	ENSG00000164187	92255	LMBRD2
464	820.155	-2.80334	0.227539	-7.9254	2.27417e-15	1.03246e-13	ENSG00000075223	10512	SEMA3C
465	1162.37	-1.93996	0.118709	-7.91821	2.40956e-15	1.09026e-13	ENSG00000173559	64859	NABP1
466	568.61	-1.80399	0.101569	-7.9157	2.45868e-15	1.1101e-13	ENSG00000138193	51196	PLCE1
467	50.4813	-3.3384	0.29565	-7.90933	2.58781e-15	1.1659e-13	ENSG00000287064	NA
468	2181.38	1.76252	0.0964175	7.90855	2.60396e-15	1.17067e-13	ENSG00000229644	NA	NAMPTP1
469	1724.55	-1.68919	0.0871658	-7.9067	2.64294e-15	1.18566e-13	ENSG00000103335	9780	PIEZO1
470	418.442	-2.72158	0.217938	-7.8994	2.80258e-15	1.2546e-13	ENSG00000146376	NA	ARHGAP18
471	150.965	-2.32389	0.167887	-7.88563	3.12954e-15	1.398e-13	ENSG00000124635	8970	H2BC11
472	857.228	1.79664	0.101035	7.88479	3.15076e-15	1.40449e-13	ENSG00000215041	84461	NEURL4
473	1277.86	-1.7678	0.0974149	-7.88177	3.22765e-15	1.43572e-13	ENSG00000148634	26091	HERC4
474	514.488	-1.88294	0.112254	-7.86559	3.67361e-15	1.63065e-13	ENSG00000142197	9980	DOP1B
475	254.112	2.40104	0.178267	7.85922	3.86542e-15	1.71218e-13	ENSG00000251369	162972	ZNF550
476	784.796	-2.92293	0.244743	-7.85692	3.93679e-15	1.74013e-13	ENSG00000169047	3667	IRS1
477	128.679	2.82114	0.23226	7.84098	4.47057e-15	1.97192e-13	ENSG00000154930	84532	ACSS1
478	67.4156	-2.88586	0.24085	-7.83001	4.8785e-15	2.14736e-13	ENSG00000004777	115703	ARHGAP33
479	2360.21	-1.6325	0.0809898	-7.80957	5.73828e-15	2.52053e-13	ENSG00000123416	NA	TUBA1B
480	10288.6	1.45874	0.0588316	7.79748	6.3157e-15	2.76838e-13	ENSG00000113013	3313	HSPA9
481	467.192	2.28871	0.165307	7.79585	6.39754e-15	2.79843e-13	ENSG00000114796	54800	KLHL24
482	1081.58	1.74858	0.0964395	7.76214	8.35086e-15	3.64527e-13	ENSG00000083937	25978	CHMP2B
483	1818.38	1.65753	0.0847186	7.7613	8.40631e-15	3.66188e-13	ENSG00000136811	4957	ODF2
484	1344.23	1.69034	0.0890379	7.75335	8.94969e-15	3.89053e-13	ENSG00000204619	6992	PPP1R11
485	16201.6	-2.37617	0.17751	-7.75263	9.00053e-15	3.90456e-13	ENSG00000106366	5054	SERPINE1
486	905.857	1.73405	0.0947079	7.75071	9.13818e-15	3.95612e-13	ENSG00000162065	57465	TBC1D24
487	95.3216	-2.53521	0.19846	-7.73563	1.02889e-14	4.44515e-13	ENSG00000135045	NA	C9orf40
488	879.466	1.69463	0.089813	7.73424	1.04022e-14	4.4849e-13	ENSG00000136935	2800	GOLGA1
489	1144.63	1.71658	0.0927097	7.72932	1.0812e-14	4.65204e-13	ENSG00000135842	116496	NIBAN1
490	48.4498	-3.19498	0.284025	-7.72811	1.09155e-14	4.68697e-13	ENSG00000178882	100533183	RFLNA
491	203.398	-2.21775	0.157673	-7.72323	1.1342e-14	4.86019e-13	ENSG00000164976	57462	MYORG
492	192.176	-2.06793	0.138507	-7.71027	1.25549e-14	5.36899e-13	ENSG00000076248	7374	UNG
493	246.328	-2.06772	0.138547	-7.70658	1.29234e-14	5.51538e-13	ENSG00000164236	651746	ANKRD33B
494	88.1267	4.22325	0.41933	7.68667	1.51016e-14	6.43192e-13	ENSG00000145088	55840	EAF2
495	1190.33	1.64848	0.0843826	7.68496	1.53041e-14	6.50503e-13	ENSG00000102978	5432	POLR2C
496	87.253	4.58462	0.466555	7.68317	1.55201e-14	6.58353e-13	ENSG00000214050	157574	FBXO16
497	687.548	-1.82457	0.107447	-7.67423	1.66414e-14	7.04497e-13	ENSG00000249992	25907	TMEM158
498	48.2964	-3.46906	0.321828	-7.67199	1.69345e-14	7.14293e-13	ENSG00000278463	8335	H2AC4
499	145.647	-2.20238	0.156725	-7.67195	1.69407e-14	7.14293e-13	ENSG00000122707	8434	RECK
500	1454.67	1.57154	0.0745775	7.66372	1.8062e-14	7.6005e-13	ENSG00000100196	11015	KDELR3
501	1417.53	-2.48116	0.193724	-7.64573	2.07767e-14	8.72537e-13	ENSG00000171992	11346	SYNPO
502	1329	1.69703	0.0911959	7.6432	2.11885e-14	8.8806e-13	ENSG00000138078	9581	PREPL
503	219.544	-2.15363	0.150989	-7.64046	2.1644e-14	9.05348e-13	ENSG00000096060	2289	FKBP5
504	179.058	2.45175	0.190432	7.62344	2.47012e-14	1.03118e-12	ENSG00000256223	7556	ZNF10
505	344.446	2.03205	0.135713	7.60467	2.85638e-14	1.19007e-12	ENSG00000163001	112942	CFAP36
506	1126.53	1.74785	0.0984485	7.59632	3.04672e-14	1.26686e-12	ENSG00000067208	7813	EVI5
507	3046.66	-1.76001	0.100128	-7.59043	3.18844e-14	1.32317e-12	ENSG00000065308	9697	TRAM2
508	201.704	2.45376	0.191607	7.58717	3.26969e-14	1.35422e-12	ENSG00000237268	NA
509	227.246	2.217	0.160415	7.58659	3.28437e-14	1.35763e-12	ENSG00000088451	23483	TGDS
510	1938.53	1.6059	0.079956	7.57797	3.51e-14	1.44805e-12	ENSG00000061987	23041	MON2
511	923.514	1.73615	0.097175	7.57554	3.57635e-14	1.47253e-12	ENSG00000130703	9885	OSBPL2
512	228.988	-2.08621	0.143637	-7.56217	3.96398e-14	1.62895e-12	ENSG00000081026	260425	MAGI3
513	144.801	-2.26984	0.168156	-7.55159	4.29978e-14	1.7635e-12	ENSG00000157542	NA	KCNJ6
514	313.778	-2.19735	0.158676	-7.54589	4.49224e-14	1.83885e-12	ENSG00000221866	91584	PLXNA4
515	263.619	-2.29748	0.172074	-7.54021	4.69219e-14	1.91696e-12	ENSG00000213763	NA	ACTBP2
516	426.644	-1.84505	0.112208	-7.5311	5.03128e-14	2.05151e-12	ENSG00000197238	8363	H4C11
517	2331.9	-3.3817	0.316313	-7.52956	5.09117e-14	2.07192e-12	ENSG00000157613	90993	CREB3L1
518	123.438	-2.38368	0.183805	-7.52795	5.15431e-14	2.09357e-12	ENSG00000147862	4781	NFIB
519	1049.43	1.67837	0.0902268	7.51847	5.54225e-14	2.2468e-12	ENSG00000158109	127262	TPRG1L
520	117.828	-2.47891	0.196875	-7.51192	5.82655e-14	2.35751e-12	ENSG00000163083	NA	INHBB
521	375.029	-1.89305	0.118914	-7.51003	5.91152e-14	2.3873e-12	ENSG00000123080	1031	CDKN2C
522	578.049	-1.76119	0.10141	-7.50609	6.09188e-14	2.45542e-12	ENSG00000112658	6722	SRF
523	10737.2	-2.22228	0.162909	-7.50284	6.24516e-14	2.51239e-12	ENSG00000128510	NA	CPA4
524	93.8018	3.25033	0.299989	7.50139	6.31462e-14	2.53549e-12	ENSG00000166246	146562	DNAAF8
525	46.9817	-3.10167	0.280258	-7.49907	6.42737e-14	2.57585e-12	ENSG00000169862	1501	CTNND2
526	163.941	-2.30134	0.173657	-7.49375	6.69316e-14	2.67727e-12	ENSG00000110080	6484	ST3GAL4
527	56.2325	-2.99661	0.266475	-7.49267	6.74888e-14	2.69443e-12	ENSG00000181751	90355	MACIR
528	179.762	-2.11903	0.149596	-7.48036	7.4119e-14	2.95153e-12	ENSG00000146950	357	SHROOM2
529	623.499	1.76459	0.102216	7.4802	7.42092e-14	2.95153e-12	ENSG00000268350	29057	FAM156A
530	622.071	-2.00386	0.134268	-7.47658	7.6281e-14	3.02821e-12	ENSG00000004399	23129	PLXND1
531	1214.88	1.62889	0.0841429	7.47402	7.77822e-14	3.08199e-12	ENSG00000108651	55813	UTP6
532	508.935	-1.88876	0.118936	-7.47261	7.86216e-14	3.10939e-12	ENSG00000161714	113026	PLCD3
533	147.363	-2.25697	0.168353	-7.4663	8.24817e-14	3.25594e-12	ENSG00000131153	51659	GINS2
534	218.218	2.23972	0.166218	7.45842	8.75643e-14	3.4501e-12	ENSG00000147894	203228	C9orf72
535	137.922	-2.43574	0.192581	-7.45526	8.96936e-14	3.52739e-12	ENSG00000144476	57007	ACKR3
536	96.3465	-2.62854	0.218818	-7.44241	9.88618e-14	3.88069e-12	ENSG00000174032	253512	SLC25A30
537	1152.75	1.8349	0.112212	7.44036	1.00408e-13	3.93404e-12	ENSG00000176018	116068	LYSMD3
538	96.3207	-2.46307	0.196687	-7.43857	1.01782e-13	3.98047e-12	ENSG00000236333	NA	TRHDE-AS1
539	169.514	-2.39748	0.187884	-7.43801	1.02215e-13	3.99001e-12	ENSG00000197905	7004	TEAD4
540	162.54	2.67367	0.225158	7.43329	1.05926e-13	4.12718e-12	ENSG00000142765	84958	SYTL1
541	1384.42	-1.56515	0.0760568	-7.43062	1.08091e-13	4.20375e-12	ENSG00000183856	128239	IQGAP3
542	179.921	-2.08687	0.146331	-7.42748	1.10687e-13	4.29678e-12	ENSG00000123737	5393	EXOSC9
543	370.244	2.08718	0.146502	7.42091	1.16317e-13	4.50702e-12	ENSG00000169359	9197	SLC33A1
544	321.362	-2.05773	0.142564	-7.4193	1.17742e-13	4.55383e-12	ENSG00000118922	11278	KLF12
545	1377.74	-1.67338	0.0908317	-7.4135	1.2301e-13	4.74884e-12	ENSG00000111206	2305	FOXM1
546	615.419	1.92881	0.125342	7.41023	1.26081e-13	4.85849e-12	ENSG00000130844	55422	ZNF331
547	170.751	2.29051	0.174259	7.40571	1.30448e-13	5.01761e-12	ENSG00000265972	10628	TXNIP
548	232.237	2.21707	0.164404	7.40293	1.33212e-13	5.11455e-12	ENSG00000119661	83544	DNAL1
549	71.1692	-2.64471	0.222224	-7.40113	1.35032e-13	5.175e-12	ENSG00000129173	79733	E2F8
550	65.546	-2.7877	0.241554	-7.40086	1.35305e-13	5.17602e-12	ENSG00000066468	2263	FGFR2
551	320.826	-1.91958	0.124269	-7.39993	1.36261e-13	5.20313e-12	ENSG00000143476	51514	DTL
552	352.589	2.01282	0.136899	7.39827	1.37971e-13	5.25889e-12	ENSG00000147852	7436	VLDLR
553	289.058	2.23561	0.167087	7.39503	1.41377e-13	5.37898e-12	ENSG00000239665	NA
554	378.96	-2.04917	0.141973	-7.38992	1.46916e-13	5.57961e-12	ENSG00000184260	8338	H2AC20
555	302.726	-2.18206	0.160402	-7.36937	1.71431e-13	6.49893e-12	ENSG00000111859	4739	NEDD9
556	126.969	2.71162	0.232323	7.36744	1.73933e-13	6.58194e-12	ENSG00000220804	NA	LINC01881
557	41.6564	-3.1887	0.297094	-7.36701	1.74497e-13	6.5914e-12	ENSG00000057657	639	PRDM1
558	528.211	-1.77348	0.105031	-7.36423	1.78175e-13	6.71829e-12	ENSG00000106462	2146	EZH2
559	414.004	-1.97157	0.132017	-7.35949	1.84617e-13	6.94874e-12	ENSG00000136720	9394	HS6ST1
560	59.3503	-3.01527	0.273933	-7.35678	1.88393e-13	7.07821e-12	ENSG00000185924	NA	RTN4RL1
561	919.241	-1.80965	0.11009	-7.3545	1.91646e-13	7.18759e-12	ENSG00000143815	3930	LBR
562	319.931	1.93273	0.126949	7.34727	2.02293e-13	7.57339e-12	ENSG00000026950	11119	BTN3A1
563	1807.8	-1.83884	0.114187	-7.3462	2.0392e-13	7.62073e-12	ENSG00000105810	1021	CDK6
564	322.608	-1.79304	0.10815	-7.33273	2.25512e-13	8.4127e-12	ENSG00000068383	3632	INPP5A
565	216.246	2.22051	0.166899	7.31286	2.61524e-13	9.73889e-12	ENSG00000081181	384	ARG2
566	842.909	-1.80076	0.109566	-7.30853	2.70089e-13	1.00401e-11	ENSG00000068489	55771	PRR11
567	246.934	-2.01517	0.138982	-7.30428	2.78747e-13	1.03436e-11	ENSG00000168078	55872	PBK
568	2851.78	1.51721	0.0708144	7.3037	2.79958e-13	1.03703e-11	ENSG00000111371	81539	SLC38A1
569	376.017	-1.90097	0.123381	-7.30233	2.8283e-13	1.04582e-11	ENSG00000169991	126917	IFFO2
570	935.824	1.68755	0.0941753	7.3007	2.86266e-13	1.05667e-11	ENSG00000136152	NA	COG3
571	2775.52	1.58847	0.0807009	7.29195	3.0551e-13	1.12573e-11	ENSG00000129292	51105	PHF20L1
572	111.163	9.65366	1.19024	7.27052	3.58102e-13	1.31721e-11	ENSG00000129993	863	CBFA2T3
573	683.577	-2.74237	0.239878	-7.26357	3.7701e-13	1.38434e-11	ENSG00000197256	25959	KANK2
574	551.997	-2.83926	0.253498	-7.25551	4.00164e-13	1.4668e-11	ENSG00000134363	10468	FST
575	961.149	1.70677	0.0975385	7.24611	4.28917e-13	1.56947e-11	ENSG00000070495	23210	JMJD6
576	60.5225	-2.98207	0.273552	-7.24568	4.30267e-13	1.57167e-11	ENSG00000173894	84733	CBX2
577	890.042	-1.79626	0.109963	-7.24112	4.4501e-13	1.62271e-11	ENSG00000183087	2621	GAS6
578	777.97	1.77231	0.106661	7.24075	4.46196e-13	1.62421e-11	ENSG00000165392	7486	WRN
579	179.537	2.46479	0.202439	7.2357	4.63143e-13	1.68299e-11	ENSG00000197415	79674	VEPH1
580	160.855	2.457	0.201429	7.23335	4.71227e-13	1.70942e-11	ENSG00000176531	653583	PHLDB3
581	26999.8	-2.94934	0.269552	-7.23176	4.76766e-13	1.72653e-11	ENSG00000137801	7057	THBS1
582	68.8938	5.45799	0.616541	7.23064	4.80732e-13	1.7379e-11	ENSG00000103154	54550	NECAB2
583	584.705	1.87683	0.121385	7.22355	5.06487e-13	1.82787e-11	ENSG00000165240	538	ATP7A
584	393.759	-2.00812	0.139648	-7.21896	5.23861e-13	1.88734e-11	ENSG00000184661	157313	CDCA2
585	1210.28	-1.65911	0.0913542	-7.21493	5.39633e-13	1.94083e-11	ENSG00000008256	9265	CYTH3
586	141.013	-2.32389	0.18353	-7.21347	5.45457e-13	1.95843e-11	ENSG00000120693	4093	SMAD9
587	280.095	2.05358	0.146116	7.21056	5.57203e-13	1.9972e-11	ENSG00000256087	9668	ZNF432
588	1138.55	1.7188	0.0996969	7.20988	5.60004e-13	2.00382e-11	ENSG00000269821	10984	KCNQ1OT1
589	130.102	-2.29025	0.178977	-7.20904	5.63493e-13	2.01289e-11	ENSG00000138376	580	BARD1
590	110.09	-2.58384	0.219778	-7.20656	5.73837e-13	2.04636e-11	ENSG00000126016	NA	AMOT
591	58.9373	-3.12729	0.295728	-7.19339	6.32004e-13	2.24998e-11	ENSG00000147041	94122	SYTL5
592	244.116	-2.14314	0.158981	-7.19043	6.45877e-13	2.29548e-11	ENSG00000112759	2030	SLC29A1
593	38.6815	-3.38647	0.332062	-7.18683	6.63132e-13	2.35283e-11	ENSG00000175305	9134	CCNE2
594	263.934	2.11928	0.15581	7.18362	6.78875e-13	2.40464e-11	ENSG00000114023	NA	FAM162A
595	501.389	1.90006	0.125306	7.18289	6.8251e-13	2.41345e-11	ENSG00000166562	90701	SEC11C
596	82.4845	-2.54709	0.215453	-7.18067	6.93695e-13	2.44888e-11	ENSG00000275714	8350	H3C1
597	43.4404	-3.28477	0.318316	-7.17766	7.09144e-13	2.49923e-11	ENSG00000124766	6659	SOX4
598	142.169	-2.24716	0.173798	-7.17594	7.18134e-13	2.52668e-11	ENSG00000161888	147841	SPC24
599	483.976	-1.96816	0.134938	-7.17487	7.23754e-13	2.5422e-11	ENSG00000148468	221061	FAM171A1
600	290.18	-2.05842	0.14755	-7.17331	7.32065e-13	2.56711e-11	ENSG00000173218	81839	VANGL1
601	124.616	-2.27315	0.177656	-7.16639	7.70009e-13	2.69567e-11	ENSG00000164619	168667	BMPER
602	213.963	-2.15529	0.161376	-7.15901	8.12625e-13	2.84014e-11	ENSG00000013619	10046	MAMLD1
603	1260.19	-1.68523	0.0957758	-7.15456	8.39397e-13	2.92884e-11	ENSG00000100503	51199	NIN
604	193.01	-2.18922	0.166288	-7.15155	8.58019e-13	2.98886e-11	ENSG00000278705	8366	H4C2
605	800.6	-1.7789	0.108964	-7.14817	8.79421e-13	3.05835e-11	ENSG00000172175	10892	MALT1
606	100.787	-2.34395	0.188077	-7.14571	8.95294e-13	3.10841e-11	ENSG00000151892	2674	GFRA1
607	64.5073	-2.69164	0.236797	-7.14385	9.07545e-13	3.14576e-11	ENSG00000187123	130574	LYPD6
608	531.546	1.78728	0.110262	7.14003	9.33074e-13	3.22893e-11	ENSG00000165516	23588	KLHDC2
609	65.3413	-2.79913	0.252037	-7.13836	9.44508e-13	3.26313e-11	ENSG00000162073	124222	PAQR4
610	4040.34	-1.5687	0.0798886	-7.11868	1.08968e-12	3.75849e-11	ENSG00000197694	6709	SPTAN1
611	935.338	-1.84198	0.118294	-7.1177	1.09743e-12	3.77904e-11	ENSG00000117399	991	CDC20
612	503.11	-1.75683	0.106467	-7.10854	1.17281e-12	4.03201e-11	ENSG00000139350	121441	NEDD1
613	385.872	-1.90395	0.127289	-7.10155	1.23367e-12	4.23433e-11	ENSG00000213030	94115	CGB8
614	1212.31	1.54561	0.0768787	7.09707	1.27425e-12	4.3665e-11	ENSG00000145740	64924	SLC30A5
615	1522.27	1.69189	0.0975039	7.09602	1.28397e-12	4.39266e-11	ENSG00000152700	51128	SAR1B
616	171.47	-2.19489	0.168408	-7.09516	1.29199e-12	4.41289e-11	ENSG00000117676	6195	RPS6KA1
617	186.221	-2.27433	0.179829	-7.08636	1.37686e-12	4.69517e-11	ENSG00000189052	93659	CGB5
618	83.3585	3.08937	0.294968	7.08337	1.40695e-12	4.79001e-11	ENSG00000080166	1638	DCT
619	122.241	-2.45277	0.205287	-7.07679	1.47537e-12	5.01482e-11	ENSG00000139174	144165	PRICKLE1
620	976.462	1.73919	0.104456	7.0765	1.47843e-12	5.01714e-11	ENSG00000176142	55254	TMEM39A
621	646.836	-1.90072	0.127302	-7.07543	1.48988e-12	5.04784e-11	ENSG00000053254	1112	FOXN3
622	724.915	1.7771	0.109913	7.07012	1.54805e-12	5.22807e-11	ENSG00000162852	163882	CNST
623	153.357	-2.17121	0.165657	-7.07013	1.54791e-12	5.22807e-11	ENSG00000173621	78999	LRFN4
624	90.5855	-2.40361	0.198549	-7.06935	1.55658e-12	5.24846e-11	ENSG00000203814	440689	H2BC18
625	2931	-1.62691	0.0887228	-7.06591	1.59569e-12	5.37175e-11	ENSG00000186575	4771	NF2
626	1133.06	1.67639	0.0957982	7.06053	1.65867e-12	5.57481e-11	ENSG00000185043	10519	CIB1
627	173.597	-2.19503	0.169324	-7.05765	1.6934e-12	5.68246e-11	ENSG00000265190	653145	ANXA8
628	253.221	-1.95637	0.135745	-7.04538	1.84957e-12	6.19664e-11	ENSG00000164211	134429	STARD4
629	987.324	-1.77233	0.10965	-7.04361	1.8732e-12	6.26583e-11	ENSG00000181467	5912	RAP2B
630	1083.8	-1.64727	0.091909	-7.04246	1.8888e-12	6.30798e-11	ENSG00000119326	8727	CTNNAL1
631	78.5858	3.55991	0.363669	7.03912	1.93451e-12	6.45041e-11	ENSG00000235944	NA	ZNF815P
632	310.675	-2.15976	0.164961	-7.03048	2.05825e-12	6.85216e-11	ENSG00000176692	2303	FOXC2
633	739.911	-1.75135	0.106904	-7.02828	2.09091e-12	6.94989e-11	ENSG00000143153	481	ATP1B1
634	117.398	-2.33538	0.190321	-7.01643	2.27604e-12	7.55328e-11	ENSG00000185909	200942	KLHDC8B
635	201.218	-3.1998	0.313583	-7.01505	2.29859e-12	7.61613e-11	ENSG00000256663	NA
636	1330.25	1.62338	0.0889009	7.0121	2.34772e-12	7.76667e-11	ENSG00000174938	26470	SEZ6L2
637	249.297	2.31365	0.187363	7.01124	2.36217e-12	7.80222e-11	ENSG00000166046	255394	TCP11L2
638	327.612	-2.03786	0.14807	-7.00923	2.39641e-12	7.9029e-11	ENSG00000157557	2114	ETS2
639	956.175	-1.86167	0.122948	-7.00845	2.40967e-12	7.93418e-11	ENSG00000175602	11007	CCDC85B
640	149.722	-2.07042	0.152751	-7.00763	2.42396e-12	7.96877e-11	ENSG00000185130	8340	H2BC13
641	150.307	-2.0734	0.153345	-6.99992	2.56117e-12	8.40671e-11	ENSG00000074047	2736	GLI2
642	214.022	-1.90607	0.129505	-6.99638	2.62659e-12	8.60802e-11	ENSG00000270882	8370	H4C14
643	319.473	-1.79972	0.114514	-6.98357	2.8777e-12	9.41629e-11	ENSG00000182628	348235	SKA2
644	2512.03	-1.84185	0.120661	-6.97698	3.0159e-12	9.85319e-11	ENSG00000158710	8407	TAGLN2
645	49.017	-2.86262	0.267007	-6.9759	3.03914e-12	9.91373e-11	ENSG00000233695	NA	GAS6-AS1
646	880.114	-1.67421	0.0967997	-6.96498	3.28453e-12	1.06976e-10	ENSG00000039523	79567	RIPOR1
647	2148.04	1.50079	0.0719351	6.96172	3.36143e-12	1.09311e-10	ENSG00000013375	5238	PGM3
648	108.613	-2.34136	0.192771	-6.95829	3.44417e-12	1.11829e-10	ENSG00000058056	8975	USP13
649	805.89	-1.67172	0.0965742	-6.95544	3.51464e-12	1.13941e-10	ENSG00000196588	57591	MRTFA
650	174.332	-2.0646	0.153234	-6.94758	3.71608e-12	1.20287e-10	ENSG00000127955	2770	GNAI1
651	522.996	1.77386	0.11149	6.94107	3.89135e-12	1.25767e-10	ENSG00000006025	114881	OSBPL7
652	854.104	-1.62857	0.0906518	-6.93386	4.0952e-12	1.32152e-10	ENSG00000065882	23216	TBC1D1
653	257.412	2.2033	0.17358	6.93222	4.14288e-12	1.33486e-10	ENSG00000165548	NA	TMEM63C
654	1825.18	1.55643	0.0803259	6.92719	4.29283e-12	1.38106e-10	ENSG00000175224	9776	ATG13
655	110.324	-2.34708	0.194882	-6.91227	4.76947e-12	1.53206e-10	ENSG00000188070	65998	ZFTA
656	1394.29	1.6293	0.0910636	6.91054	4.82826e-12	1.54858e-10	ENSG00000135968	9648	GCC2
657	571.969	-1.84852	0.123079	-6.89409	5.42101e-12	1.73604e-10	ENSG00000152465	9397	NMT2
658	876.952	1.71872	0.104348	6.8877	5.67027e-12	1.81311e-10	ENSG00000257093	57189	DENND11
659	447.053	-1.89831	0.130442	-6.88665	5.71235e-12	1.82379e-10	ENSG00000196747	8329	H2AC13
660	213.165	-2.96787	0.28591	-6.88283	5.86758e-12	1.87051e-10	ENSG00000103449	6299	SALL1
661	383.663	1.94916	0.137964	6.87972	5.99716e-12	1.90893e-10	ENSG00000269937	NA
662	86.0325	-2.42597	0.207331	-6.87777	6.07985e-12	1.93233e-10	ENSG00000125266	1948	EFNB2
663	1351	1.62108	0.090307	6.87745	6.09325e-12	1.93366e-10	ENSG00000135655	9958	USP15
664	39.1794	-3.34351	0.340774	-6.87702	6.11195e-12	1.93668e-10	ENSG00000131386	117248	GALNT15
665	41.1954	-3.07632	0.301979	-6.87571	6.16836e-12	1.95161e-10	ENSG00000267218	NA
666	2107.49	1.63907	0.0930554	6.86762	6.52814e-12	2.06234e-10	ENSG00000116127	7840	ALMS1
667	348.9	-1.85036	0.123835	-6.86685	6.56355e-12	2.07042e-10	ENSG00000176903	9240	PNMA1
668	142.475	-2.29572	0.188885	-6.85981	6.89507e-12	2.17174e-10	ENSG00000154764	7476	WNT7A
669	312.277	-1.91729	0.134124	-6.83915	7.96621e-12	2.50537e-10	ENSG00000278828	8357	H3C10
670	1430.14	-1.59995	0.087736	-6.83809	8.02585e-12	2.52036e-10	ENSG00000107438	9124	PDLIM1
671	318.973	1.90046	0.131701	6.83712	8.07982e-12	2.53352e-10	ENSG00000173480	147687	ZNF417
672	224.779	-2.00402	0.146864	-6.8364	8.12076e-12	2.54257e-10	ENSG00000111885	4121	MAN1A1
673	365.799	-1.70821	0.10379	-6.82346	8.88746e-12	2.77849e-10	ENSG00000116830	8458	TTF2
674	1756.45	1.57283	0.0840067	6.81887	9.17616e-12	2.86449e-10	ENSG00000111711	51026	GOLT1B
675	396.375	-2.6978	0.249287	-6.81061	9.7186e-12	3.02932e-10	ENSG00000156463	153769	SH3RF2
676	43.9465	-3.08454	0.306193	-6.80793	9.90128e-12	3.0817e-10	ENSG00000149571	84623	KIRREL3
677	317.505	-1.81729	0.120116	-6.80422	1.01599e-11	3.15753e-10	ENSG00000234664	NA	HMGN2P5
678	87.6225	6.06365	0.744403	6.8023	1.02964e-11	3.19523e-10	ENSG00000174951	2523	FUT1
679	89.657	2.99285	0.293193	6.79707	1.0677e-11	3.30847e-10	ENSG00000159885	7673	ZNF222
680	104.071	2.69242	0.24909	6.79439	1.08771e-11	3.36551e-10	ENSG00000164778	2020	EN2
681	142.029	-2.20179	0.177126	-6.78497	1.16107e-11	3.5872e-10	ENSG00000266074	57597	BAHCC1
682	568.836	-1.77989	0.115118	-6.77474	1.24634e-11	3.84501e-10	ENSG00000259781	NA	HMGB1P6
683	5247.45	1.59917	0.0885623	6.76555	1.32804e-11	4.09107e-10	ENSG00000071537	6400	SEL1L
684	2294.95	-1.80088	0.118406	-6.76388	1.34342e-11	4.1324e-10	ENSG00000130147	23677	SH3BP4
685	261.879	-1.99561	0.147253	-6.76121	1.36847e-11	4.2033e-10	ENSG00000112029	26271	FBXO5
686	702.834	-1.73463	0.108812	-6.75135	1.46473e-11	4.49241e-10	ENSG00000168077	51435	SCARA3
687	113.886	2.59885	0.237157	6.74174	1.565e-11	4.79296e-10	ENSG00000134242	26191	PTPN22
688	927.328	1.63634	0.0944098	6.74022	1.58152e-11	4.83651e-10	ENSG00000130766	83667	SESN2
689	215.892	-1.97136	0.144139	-6.73902	1.59455e-11	4.86929e-10	ENSG00000112640	5528	PPP2R5D
690	468.956	-1.87457	0.129913	-6.73195	1.67407e-11	5.10471e-10	ENSG00000162522	57648	KIAA1522
691	72.7658	3.5046	0.372169	6.72974	1.69964e-11	5.17516e-10	ENSG00000241743	NA	XACT
692	1513.8	1.62641	0.0930932	6.7289	1.70954e-11	5.19778e-10	ENSG00000115486	2677	GGCX
693	1644.98	1.50052	0.0744315	6.72454	1.76145e-11	5.3479e-10	ENSG00000052841	55761	TTC17
694	527.928	1.81728	0.121571	6.72263	1.7847e-11	5.41067e-10	ENSG00000162851	64216	TFB2M
695	680.3	1.72482	0.107905	6.71716	1.85299e-11	5.60962e-10	ENSG00000184178	152579	SCFD2
696	376.446	-1.86309	0.128693	-6.70655	1.99281e-11	6.02425e-10	ENSG00000214717	9189	ZBED1
697	3605.41	1.53056	0.0791509	6.7032	2.03898e-11	6.15497e-10	ENSG00000113615	10802	SEC24A
698	248.182	-1.9682	0.144631	-6.69429	2.16722e-11	6.53272e-10	ENSG00000154146	4900	NRGN
699	210.329	2.10435	0.165013	6.69251	2.19367e-11	6.60299e-10	ENSG00000128165	79924	ADM2
700	205.9	2.12337	0.168006	6.6865	2.28564e-11	6.86998e-10	ENSG00000163138	133015	PACRGL
701	133.102	-2.12234	0.16796	-6.6822	2.35378e-11	7.0647e-10	ENSG00000170545	57228	SMAGP
702	235.816	-1.86907	0.130063	-6.68191	2.35844e-11	7.0686e-10	ENSG00000189337	23254	KAZN
703	442.977	-1.78055	0.116891	-6.67761	2.4287e-11	7.26881e-10	ENSG00000153976	NA	HS3ST3A1
704	78.3602	8.98243	1.19632	6.6725	2.51477e-11	7.51572e-10	ENSG00000137090	1761	DMRT1
705	117.89	7.88771	1.0332	6.66638	2.62183e-11	7.8246e-10	ENSG00000145113	4585	MUC4
706	591.54	-2.75354	0.263426	-6.65665	2.80132e-11	8.34842e-10	ENSG00000111186	81029	WNT5B
707	2566.61	1.52826	0.0795616	6.63961	3.14518e-11	9.35991e-10	ENSG00000167110	2801	GOLGA2
708	362.965	-1.86008	0.12956	-6.63852	3.16845e-11	9.41586e-10	ENSG00000140332	7090	TLE3
709	206.51	-1.98352	0.148172	-6.63769	3.18628e-11	9.45547e-10	ENSG00000145604	6502	SKP2
710	83.073	3.68613	0.404781	6.63602	3.22263e-11	9.54988e-10	ENSG00000147614	245972	ATP6V0D2
711	665.825	-1.72763	0.109728	-6.63123	3.32906e-11	9.85138e-10	ENSG00000132967	NA	HMGB1P5
712	453.255	-1.68579	0.103477	-6.62751	3.41399e-11	1.00885e-09	ENSG00000138031	109	ADCY3
713	3821.83	-1.5951	0.0898564	-6.62279	3.52472e-11	1.04011e-09	ENSG00000075426	2355	FOSL2
714	144.737	2.25113	0.188988	6.62017	3.58778e-11	1.05724e-09	ENSG00000185495	NA	SEPTIN7P13
715	87.8888	-3.90029	0.43867	-6.61156	3.80286e-11	1.11905e-09	ENSG00000214357	54492	NEURL1B
716	91.304	-2.49186	0.225687	-6.61029	3.83577e-11	1.12559e-09	ENSG00000097046	8317	CDC7
717	69.9007	-2.45863	0.220658	-6.61038	3.8334e-11	1.12559e-09	ENSG00000117461	8503	PIK3R3
718	1127.52	1.65006	0.0984885	6.60039	4.10064e-11	1.20164e-09	ENSG00000125630	84172	POLR1B
719	1944.59	-1.76726	0.116305	-6.59699	4.19597e-11	1.22701e-09	ENSG00000164292	22836	RHOBTB3
720	723.228	-1.62622	0.0949266	-6.59688	4.19891e-11	1.22701e-09	ENSG00000019144	23187	PHLDB1
721	73.0841	5.42997	0.672019	6.59203	4.33851e-11	1.26605e-09	ENSG00000102409	56271	BEX4
722	91.1171	-2.44338	0.219138	-6.58664	4.499e-11	1.31107e-09	ENSG00000130052	9754	STARD8
723	355.239	-1.81991	0.124536	-6.58377	4.5866e-11	1.33474e-09	ENSG00000148019	84131	CEP78
724	862.238	1.61144	0.0929057	6.58129	4.66396e-11	1.35538e-09	ENSG00000070540	55062	WIPI1
725	779.617	-1.79127	0.120261	-6.57959	4.71742e-11	1.36903e-09	ENSG00000107130	23413	NCS1
726	664.802	1.666	0.101275	6.57621	4.82577e-11	1.39854e-09	ENSG00000107077	23081	KDM4C
727	326.563	1.92833	0.141178	6.57556	4.84719e-11	1.40282e-09	ENSG00000173221	2745	GLRX
728	63.0939	-2.59995	0.243335	-6.5751	4.86192e-11	1.40515e-09	ENSG00000174469	26047	CNTNAP2
729	40.9767	-3.17156	0.330363	-6.57325	4.92287e-11	1.42081e-09	ENSG00000068078	2261	FGFR3
730	1474.02	1.53889	0.0819956	6.57216	4.95895e-11	1.42927e-09	ENSG00000143183	54499	TMCO1
731	1671.19	-1.75627	0.115235	-6.56286	5.27863e-11	1.51932e-09	ENSG00000288825	8337	H2AC18
732	1306.39	1.58943	0.0899266	6.55459	5.57946e-11	1.60371e-09	ENSG00000134759	55250	ELP2
733	43.6189	-3.05536	0.313589	-6.55431	5.59015e-11	1.60459e-09	ENSG00000156239	29104	N6AMT1
734	1450.04	-2.14156	0.174182	-6.55381	5.60882e-11	1.60776e-09	ENSG00000143878	388	RHOB
735	86.8939	3.05816	0.314211	6.55025	5.74395e-11	1.64425e-09	ENSG00000162551	249	ALPL
736	232.21	-1.92674	0.141602	-6.54465	5.96349e-11	1.70478e-09	ENSG00000184384	84441	MAML2
737	56.6749	3.68516	0.410341	6.54372	6.00078e-11	1.71079e-09	ENSG00000271525	NA	ARF4P1
738	772.661	-2.43956	0.219989	-6.54378	5.99837e-11	1.71079e-09	ENSG00000150347	84159	ARID5B
739	249.767	-1.79985	0.122269	-6.54171	6.08199e-11	1.7316e-09	ENSG00000123364	NA	HOXC13
740	2302.76	-1.55991	0.0856205	-6.53948	6.17348e-11	1.75527e-09	ENSG00000288701	84726	PRRC2B
741	75.4453	3.13552	0.32662	6.53825	6.22414e-11	1.76729e-09	ENSG00000273812	NA
742	1794.06	-1.54774	0.0838204	-6.53473	6.37246e-11	1.80696e-09	ENSG00000141526	9123	SLC16A3
743	572.527	-1.69118	0.105808	-6.53238	6.47333e-11	1.83309e-09	ENSG00000183337	54880	BCOR
744	63.5897	4.26464	0.4998	6.53189	6.49437e-11	1.83658e-09	ENSG00000261114	NA
745	42.5202	-2.9669	0.3013	-6.52806	6.66273e-11	1.88166e-09	ENSG00000163362	55765	INAVA
746	216.731	-2.06709	0.163502	-6.5265	6.73264e-11	1.89886e-09	ENSG00000115363	84141	EVA1A
747	273.397	-1.84373	0.129294	-6.52573	6.76731e-11	1.90608e-09	ENSG00000108219	81619	TSPAN14
748	825.673	1.64362	0.0986687	6.523	6.89149e-11	1.93846e-09	ENSG00000172057	94103	ORMDL3
749	345.843	1.851	0.130545	6.51886	7.08418e-11	1.99e-09	ENSG00000144741	115286	SLC25A26
750	1472.76	-1.67592	0.103706	-6.51765	7.14198e-11	2.00356e-09	ENSG00000128283	NA	CDC42EP1
751	115.352	-2.43562	0.22039	-6.51397	7.31905e-11	2.0505e-09	ENSG00000138675	2250	FGF5
752	142.917	2.28086	0.196881	6.50578	7.72927e-11	2.16255e-09	ENSG00000006432	4293	MAP3K9
753	522.772	1.6999	0.107594	6.50501	7.76882e-11	2.17073e-09	ENSG00000181982	91050	CCDC149
754	41.1581	-3.14674	0.330241	-6.50052	8.00405e-11	2.23349e-09	ENSG00000105855	3696	ITGB8
755	557.138	-3.56237	0.394219	-6.49986	8.03967e-11	2.24046e-09	ENSG00000166897	NA	ELFN2
756	89.7037	2.94074	0.298704	6.4972	8.18276e-11	2.27732e-09	ENSG00000131242	84440	RAB11FIP4
757	1474.57	-2.12945	0.174074	-6.48835	8.67835e-11	2.41206e-09	ENSG00000066279	259266	ASPM
758	1049.37	-2.22203	0.188384	-6.48693	8.76048e-11	2.43167e-09	ENSG00000129680	79649	MAP7D3
759	4151.54	1.69986	0.108184	6.4692	9.85214e-11	2.73108e-09	ENSG00000087074	NA	PPP1R15A
760	166.998	2.19212	0.184451	6.46305	1.02611e-10	2.83392e-09	ENSG00000164542	23366	KIAA0895
761	465.702	-1.86436	0.133735	-6.46322	1.02501e-10	2.83392e-09	ENSG00000182963	10052	GJC1
762	220.012	-1.87478	0.135352	-6.46302	1.02635e-10	2.83392e-09	ENSG00000175063	11065	UBE2C
763	51.7799	4.24573	0.503349	6.44827	1.13135e-10	3.11974e-09	ENSG00000261949	100507003	GFY
764	1265.96	-1.57233	0.0888156	-6.44398	1.16383e-10	3.2051e-09	ENSG00000198830	3151	HMGN2
765	580.419	1.73614	0.114275	6.44182	1.18053e-10	3.24683e-09	ENSG00000116752	NA	BCAS2
766	63.1875	3.22994	0.346386	6.43775	1.21261e-10	3.33073e-09	ENSG00000157578	150082	LCA5L
767	476.074	-1.78465	0.121915	-6.43602	1.22645e-10	3.36433e-09	ENSG00000031081	57514	ARHGAP31
768	384.204	-1.84006	0.130618	-6.43143	1.26409e-10	3.46308e-09	ENSG00000127124	59269	HIVEP3
769	51.2616	5.03578	0.628345	6.42287	1.33726e-10	3.65876e-09	ENSG00000215354	NA	FAM90A24P
770	117.84	2.44449	0.225129	6.41625	1.39674e-10	3.81654e-09	ENSG00000077984	8530	CST7
771	51.5755	-2.7717	0.276329	-6.41157	1.44028e-10	3.93041e-09	ENSG00000004660	84254	CAMKK1
772	127.073	-2.28483	0.200482	-6.40869	1.46771e-10	4.00008e-09	ENSG00000152495	814	CAMK4
773	54.6189	4.06486	0.478299	6.40784	1.47596e-10	4.01736e-09	ENSG00000224273	NA	RABGEF1P3
774	205.97	-1.92693	0.144789	-6.40195	1.53406e-10	4.1701e-09	ENSG00000111665	83461	CDCA3
775	53.7207	5.36157	0.68185	6.39666	1.58807e-10	4.31136e-09	ENSG00000229953	NA
776	142.9	-2.12445	0.175803	-6.3961	1.59398e-10	4.32183e-09	ENSG00000164045	993	CDC25A
777	92.9941	2.62284	0.253764	6.39508	1.60468e-10	4.34523e-09	ENSG00000267265	NA	GP6-AS1
778	573.952	1.69682	0.108978	6.39416	1.61429e-10	4.36564e-09	ENSG00000138002	26160	IFT172
779	206.287	1.95867	0.150009	6.39078	1.65047e-10	4.45775e-09	ENSG00000187601	28986	MAGEH1
780	874.723	1.76308	0.119424	6.38969	1.66224e-10	4.48377e-09	ENSG00000197530	142678	MIB2
781	214.528	-1.85074	0.133418	-6.3765	1.81177e-10	4.88088e-09	ENSG00000133401	23037	PDZD2
782	280.668	-1.8384	0.131908	-6.35595	2.07147e-10	5.57337e-09	ENSG00000167889	146664	MGAT5B
783	1406.18	1.58913	0.092754	6.35151	2.13212e-10	5.72192e-09	ENSG00000136010	160428	ALDH1L2
784	249.583	2.00229	0.1578	6.35169	2.12968e-10	5.72192e-09	ENSG00000166971	64400	AKTIP
785	290.474	-1.81872	0.128934	-6.3499	2.15449e-10	5.77459e-09	ENSG00000162783	51278	IER5
786	1806.44	-2.34901	0.212495	-6.34846	2.17483e-10	5.82167e-09	ENSG00000058668	493	ATP2B4
787	314.978	-1.8446	0.133085	-6.34636	2.20472e-10	5.89418e-09	ENSG00000107282	320	APBA1
788	25.1435	-3.55405	0.402774	-6.34115	2.28054e-10	6.08915e-09	ENSG00000162745	25903	OLFML2B
789	3265.06	-1.51228	0.0808326	-6.33758	2.33408e-10	6.22421e-09	ENSG00000094916	23468	CBX5
790	668.487	-1.62912	0.0992811	-6.33675	2.34663e-10	6.24976e-09	ENSG00000275832	57636	ARHGAP23
791	1522.2	-1.60879	0.0960769	-6.33649	2.35058e-10	6.25237e-09	ENSG00000189403	3146	HMGB1
792	101.351	-2.29747	0.204913	-6.33181	2.42306e-10	6.43701e-09	ENSG00000122420	5737	PTGFR
793	777.86	-2.4635	0.231213	-6.32967	2.4568e-10	6.51843e-09	ENSG00000198053	140885	SIRPA
794	165.209	2.16492	0.184104	6.32752	2.49129e-10	6.6016e-09	ENSG00000267002	NA
795	141.96	2.26038	0.199257	6.32542	2.52543e-10	6.68365e-09	ENSG00000174132	345757	FAM174A
796	85.3039	-5.03718	0.638348	-6.32442	2.54181e-10	6.71855e-09	ENSG00000078401	1906	EDN1
797	25.0973	-3.7523	0.435523	-6.31952	2.62385e-10	6.92671e-09	ENSG00000175093	NA	SPSB4
798	105.011	-3.23804	0.354708	-6.30953	2.79875e-10	7.37917e-09	ENSG00000216775	730101
799	76.0866	-2.41075	0.223612	-6.30891	2.81004e-10	7.39966e-09	ENSG00000246273	283104	SBF2-AS1
800	137.127	-2.29003	0.204783	-6.29953	2.98557e-10	7.85205e-09	ENSG00000079215	6507	SLC1A3
801	138.465	2.40881	0.223684	6.2982	3.01129e-10	7.90981e-09	ENSG00000170417	130827	TMEM182
802	374.179	-1.74652	0.118593	-6.29479	3.07808e-10	8.07515e-09	ENSG00000235162	387882	C12orf75
803	708.601	-1.54932	0.0872711	-6.29444	3.0852e-10	8.08376e-09	ENSG00000076382	10615	SPAG5
804	67.2523	2.91791	0.304731	6.29378	3.0983e-10	8.108e-09	ENSG00000163611	152185	SPICE1
805	979.487	-1.65024	0.103461	-6.28489	3.28091e-10	8.57521e-09	ENSG00000142627	1969	EPHA2
806	907.901	-1.67161	0.106877	-6.28401	3.2996e-10	8.61334e-09	ENSG00000198947	1756	DMD
807	805.004	-1.69947	0.111323	-6.28323	3.31599e-10	8.64542e-09	ENSG00000107249	169792	GLIS3
808	841.312	-1.49223	0.0783895	-6.27929	3.40113e-10	8.8564e-09	ENSG00000112118	4172	MCM3
809	685.588	1.64534	0.102795	6.278	3.4296e-10	8.91951e-09	ENSG00000059804	6515	SLC2A3
810	82.9322	-2.38307	0.220356	-6.27654	3.46189e-10	8.99237e-09	ENSG00000003989	6542	SLC7A2
811	2148.44	1.47712	0.076033	6.27516	3.49278e-10	9.06142e-09	ENSG00000110048	NA	OSBP
812	898.576	-1.79281	0.126356	-6.27439	3.5101e-10	9.08938e-09	ENSG00000204217	659	BMPR2
813	952.181	-1.55646	0.0886881	-6.2743	3.5122e-10	9.08938e-09	ENSG00000090889	24137	KIF4A
814	107.836	-2.22736	0.195628	-6.27398	3.51944e-10	9.09692e-09	ENSG00000182010	219790	RTKN2
815	62.2029	-2.46003	0.232733	-6.27343	3.5317e-10	9.11742e-09	ENSG00000152253	57405	SPC25
816	1866.9	-1.50853	0.0810648	-6.27311	3.53904e-10	9.12518e-09	ENSG00000010292	NA	NCAPD2
817	19.2378	-4.47485	0.55416	-6.27048	3.59944e-10	9.26955e-09	ENSG00000178031	92949	ADAMTSL1
818	943.006	-2.20622	0.192406	-6.26912	3.63083e-10	9.33895e-09	ENSG00000183779	80139	ZNF703
819	170.981	-2.12467	0.179424	-6.26822	3.65205e-10	9.38207e-09	ENSG00000166396	8710	SERPINB7
820	7958.89	-1.42485	0.0678786	-6.2589	3.87697e-10	9.94774e-09	ENSG00000196230	203068	TUBB
821	543.578	-1.78844	0.125985	-6.25821	3.89423e-10	9.97986e-09	ENSG00000106571	2737	GLI3
822	986.81	-1.62796	0.10043	-6.25274	4.03312e-10	1.03232e-08	ENSG00000134057	891	CCNB1
823	699.933	-1.68908	0.110518	-6.23502	4.51723e-10	1.15483e-08	ENSG00000163110	10611	PDLIM5
824	128.036	-2.04107	0.167019	-6.23326	4.56832e-10	1.16647e-08	ENSG00000177106	64787	EPS8L2
825	485.16	1.85197	0.136818	6.22703	4.75345e-10	1.21227e-08	ENSG00000203761	NA	MSTO2P
826	485.734	-3.02252	0.326448	-6.19553	5.80897e-10	1.47967e-08	ENSG00000143507	NA	DUSP10
827	163.852	-2.04429	0.168813	-6.18609	6.1675e-10	1.5691e-08	ENSG00000182541	3985	LIMK2
828	164.37	2.29993	0.210195	6.1844	6.23384e-10	1.58406e-08	ENSG00000275395	8857	FCGBP
829	108.054	-2.06703	0.172602	-6.18203	6.32811e-10	1.60607e-08	ENSG00000101003	9837	GINS1
830	253.139	2.02064	0.165306	6.17425	6.64764e-10	1.68514e-08	ENSG00000197620	91966	EOLA1
831	157.453	-1.92052	0.149113	-6.17328	6.68858e-10	1.69348e-08	ENSG00000129195	54478	PIMREG
832	462.832	-1.68635	0.111242	-6.16984	6.83605e-10	1.72873e-08	ENSG00000109805	NA	NCAPG
833	1608.68	-1.53615	0.0869391	-6.16701	6.95913e-10	1.75774e-08	ENSG00000050820	9564	BCAR1
834	4110.62	1.49116	0.0796542	6.1661	6.99969e-10	1.76587e-08	ENSG00000196365	9361	LONP1
835	654.243	-1.73546	0.119327	-6.16336	7.12174e-10	1.79451e-08	ENSG00000073712	10979	FERMT2
836	60.6142	8.35608	1.19481	6.15671	7.42726e-10	1.86925e-08	ENSG00000105550	26291	FGF21
837	315.149	-1.80891	0.131416	-6.15535	7.49099e-10	1.88304e-08	ENSG00000125733	9322	TRIP10
838	160.204	2.11738	0.181573	6.15389	7.56048e-10	1.89824e-08	ENSG00000116151	79906	MORN1
839	53.872	-2.53682	0.250154	-6.14352	8.07126e-10	2.02407e-08	ENSG00000250899	NA
840	518.022	1.70761	0.115399	6.13186	8.68595e-10	2.17562e-08	ENSG00000145390	54532	USP53
841	310.992	-1.78525	0.1282	-6.12516	9.0592e-10	2.26642e-08	ENSG00000181588	399664	MEX3D
842	1389.43	1.55041	0.089907	6.12204	9.23825e-10	2.30846e-08	ENSG00000116198	9731	CEP104
843	307.178	1.92729	0.151535	6.1193	9.399e-10	2.34585e-08	ENSG00000185621	89782	LMLN
844	19594	-1.55745	0.0914013	-6.09898	1.06746e-09	2.66106e-08	ENSG00000100345	4627	MYH9
845	108.194	-2.16455	0.190957	-6.09847	1.07091e-09	2.66651e-08	ENSG00000184992	140707	BRI3BP
846	167.016	2.35166	0.221758	6.09519	1.09304e-09	2.7184e-08	ENSG00000261150	83481	EPPK1
847	263.909	-1.87166	0.143035	-6.09408	1.1007e-09	2.7342e-08	ENSG00000134516	1794	DOCK2
848	398.458	-1.74161	0.121723	-6.09254	1.11134e-09	2.75737e-08	ENSG00000135454	2583	B4GALNT1
849	198.623	1.98627	0.161913	6.09136	1.11954e-09	2.77445e-08	ENSG00000111801	10384	BTN3A3
850	1164.32	-1.61278	0.100604	-6.09102	1.12194e-09	2.77712e-08	ENSG00000101871	4281	MID1
851	636.314	-2.49662	0.245729	-6.09054	1.12532e-09	2.78222e-08	ENSG00000181104	2149	F2R
852	45.5559	-2.93666	0.318304	-6.08432	1.16985e-09	2.88892e-08	ENSG00000237424	84793	FOXD2-AS1
853	433.968	-1.91735	0.150784	-6.08388	1.17307e-09	2.89348e-08	ENSG00000168807	6645	SNTB2
854	326.491	-1.7979	0.131179	-6.08251	1.18316e-09	2.91495e-08	ENSG00000184678	8349	H2BC21
855	153.423	2.16278	0.191299	6.07835	1.21422e-09	2.98799e-08	ENSG00000134899	2073	ERCC5
856	171.251	2.1038	0.181623	6.0774	1.22144e-09	3.00223e-08	ENSG00000102575	54	ACP5
857	116.044	-2.17219	0.192952	-6.07502	1.23976e-09	3.04369e-08	ENSG00000117602	11123	RCAN3
858	91.7252	-2.2671	0.20867	-6.07227	1.26118e-09	3.09269e-08	ENSG00000153721	154043	CNKSR3
859	1489.81	1.59414	0.0978748	6.07037	1.27619e-09	3.12585e-08	ENSG00000183696	7378	UPP1
860	56.9176	3.30754	0.380266	6.06823	1.29328e-09	3.16404e-08	ENSG00000177324	139105	BEND2
861	60.988	-2.56551	0.258208	-6.06299	1.33618e-09	3.26518e-08	ENSG00000179046	205860	TRIML2
862	219.23	2.13945	0.188011	6.06056	1.35646e-09	3.31089e-08	ENSG00000163376	84541	KBTBD8
863	211.028	-1.83339	0.137592	-6.05696	1.38716e-09	3.38191e-08	ENSG00000136114	55901	THSD1
864	52.0737	5.10407	0.678183	6.05157	1.43438e-09	3.49298e-08	ENSG00000004838	51364	ZMYND10
865	322.71	-1.87566	0.144729	-6.05031	1.44565e-09	3.51637e-08	ENSG00000189159	51155	JPT1
866	37.0835	-2.91414	0.316536	-6.04714	1.47435e-09	3.58203e-08	ENSG00000120937	4879	NPPB
867	660.935	-2.33958	0.221762	-6.04062	1.5352e-09	3.72556e-08	ENSG00000185551	7026	NR2F2
868	142.3	2.11718	0.184989	6.03917	1.54912e-09	3.75501e-08	ENSG00000135245	NA	HILPDA
869	905.455	-1.62127	0.102881	-6.03876	1.55306e-09	3.76024e-08	ENSG00000081923	5205	ATP8B1
870	256.252	-1.96547	0.15992	-6.03721	1.56805e-09	3.78905e-08	ENSG00000171608	5293	PIK3CD
871	139.439	-1.9182	0.152091	-6.03715	1.56857e-09	3.78905e-08	ENSG00000088756	79822	ARHGAP28
872	464.623	-1.74422	0.123301	-6.03583	1.58144e-09	3.81577e-08	ENSG00000142634	79180	EFHD2
873	4131.27	-2.00611	0.166791	-6.03218	1.61764e-09	3.89418e-08	ENSG00000160789	4000	LMNA
874	727.448	-1.75672	0.125444	-6.03236	1.61584e-09	3.89418e-08	ENSG00000169641	7798	LUZP1
875	159.095	-2.07522	0.178526	-6.02275	1.71483e-09	4.11872e-08	ENSG00000143126	NA	CELSR2
876	2044.1	-1.67989	0.112885	-6.02285	1.71373e-09	4.11872e-08	ENSG00000154380	55740	ENAH
877	89.3133	-2.26933	0.210795	-6.02162	1.7268e-09	4.14275e-08	ENSG00000227295	NA	ELL2P1
878	724.961	-1.50874	0.0845037	-6.02037	1.74018e-09	4.17009e-08	ENSG00000149782	5331	PLCB3
879	43.1941	5.53967	0.75408	6.02015	1.74257e-09	4.17108e-08	ENSG00000254229	NA	FAM90A12P
880	87.7663	2.57795	0.262488	6.01152	1.83794e-09	4.39434e-08	ENSG00000104213	5157	PDGFRL
881	25.6336	-3.47016	0.411208	-6.00708	1.88897e-09	4.51122e-08	ENSG00000250305	57604	TRMT9B
882	253.285	-1.84098	0.140031	-6.00564	1.90573e-09	4.5461e-08	ENSG00000110400	5818	NECTIN1
883	145.704	-1.98692	0.164338	-6.00539	1.90874e-09	4.54812e-08	ENSG00000139880	64403	CDH24
884	306.591	1.79661	0.133029	5.98822	2.12152e-09	5.04941e-08	ENSG00000049167	1161	ERCC8
885	7086.05	1.37766	0.0631026	5.9849	2.16522e-09	5.1476e-08	ENSG00000122218	NA	COPA
886	755.327	1.57711	0.0964685	5.98237	2.19919e-09	5.22246e-08	ENSG00000137824	55177	RMDN3
887	83.3853	-2.3003	0.217438	-5.98012	2.2298e-09	5.28917e-08	ENSG00000051180	5888	RAD51
888	346.055	-1.80977	0.135462	-5.97787	2.26071e-09	5.35645e-08	ENSG00000004478	2288	FKBP4
889	58.594	4.01281	0.504095	5.97666	2.27753e-09	5.39024e-08	ENSG00000227038	NA	GTF2IP7
890	28.8866	-3.12378	0.355494	-5.97417	2.31269e-09	5.4673e-08	ENSG00000147234	84443	FRMPD3
891	92.2113	2.6123	0.269976	5.97201	2.34344e-09	5.53156e-08	ENSG00000248498	389652	ASNSP1
892	651.415	1.58684	0.0982677	5.9719	2.34513e-09	5.53156e-08	ENSG00000100592	23002	DAAM1
893	71.5195	3.47458	0.414502	5.97001	2.37241e-09	5.58965e-08	ENSG00000099338	57828	CATSPERG
894	444.082	1.74514	0.124889	5.96641	2.42531e-09	5.70789e-08	ENSG00000059728	4084	MXD1
895	1429.96	1.57394	0.09624	5.96359	2.46758e-09	5.80087e-08	ENSG00000129315	904	CCNT1
896	87.6747	-2.25109	0.209971	-5.95837	2.54761e-09	5.98234e-08	ENSG00000130702	3911	LAMA5
897	447.357	1.77917	0.130853	5.95456	2.6077e-09	6.11662e-08	ENSG00000165195	5277	PIGA
898	276.856	-3.06677	0.347159	-5.95338	2.62662e-09	6.15412e-08	ENSG00000117152	5999	RGS4
899	366.317	-1.62693	0.105512	-5.94184	2.81835e-09	6.596e-08	ENSG00000187741	2175	FANCA
900	32.1926	-3.02922	0.341625	-5.93991	2.85186e-09	6.66702e-08	ENSG00000184162	126382	NR2C2AP
901	65.9054	3.55625	0.430613	5.93632	2.91494e-09	6.80693e-08	ENSG00000163884	28999	KLF15
902	299.064	1.83278	0.140312	5.93523	2.93432e-09	6.84459e-08	ENSG00000006652	3475	IFRD1
903	1039.04	1.58262	0.0981691	5.93482	2.94174e-09	6.85429e-08	ENSG00000111674	2026	ENO2
904	39.3187	4.21147	0.541173	5.93427	2.95153e-09	6.86949e-08	ENSG00000140254	90527	DUOXA1
905	687.871	1.6478	0.109174	5.93367	2.96242e-09	6.88722e-08	ENSG00000125740	2354	FOSB
906	2002.47	1.62141	0.104837	5.92739	3.07779e-09	7.14754e-08	ENSG00000145725	23262	PPIP5K2
907	184.467	2.04199	0.175836	5.92589	3.10617e-09	7.20549e-08	ENSG00000169330	23251	MINAR1
908	91.9656	-2.12884	0.19075	-5.91792	3.26038e-09	7.55489e-08	ENSG00000131737	3885	KRT34
909	391.104	-1.68866	0.116423	-5.91513	3.3161e-09	7.67556e-08	ENSG00000133818	22800	RRAS2
910	555.622	1.73427	0.124219	5.91114	3.39745e-09	7.8552e-08	ENSG00000198799	9860	LRIG2
911	514.568	-1.60703	0.102777	-5.90632	3.49835e-09	8.07075e-08	ENSG00000134690	55143	CDCA8
912	337.302	-1.89113	0.150877	-5.90637	3.49735e-09	8.07075e-08	ENSG00000157350	6483	ST3GAL2
913	120.55	-2.02456	0.173483	-5.90583	3.50869e-09	8.08574e-08	ENSG00000138346	1763	DNA2
914	572.886	-1.6228	0.105462	-5.90548	3.51632e-09	8.09446e-08	ENSG00000176871	55884	WSB2
915	68.2052	-2.35882	0.230115	-5.90495	3.52757e-09	8.11148e-08	ENSG00000080573	50509	COL5A3
916	40.589	-2.76639	0.299252	-5.90268	3.57649e-09	8.215e-08	ENSG00000006377	1750	DLX6
917	541.317	-1.68662	0.116388	-5.8994	3.64817e-09	8.3705e-08	ENSG00000237649	3833	KIFC1
918	201.172	-1.90006	0.152587	-5.89868	3.66417e-09	8.39806e-08	ENSG00000142731	10733	PLK4
919	400.817	-1.73919	0.12533	-5.89798	3.6797e-09	8.42448e-08	ENSG00000174099	253827	MSRB3
920	1444.16	1.52302	0.0886969	5.89668	3.70892e-09	8.48213e-08	ENSG00000108433	9570	GOSR2
921	102.48	2.63717	0.27772	5.89506	3.74556e-09	8.55664e-08	ENSG00000164746	136288	C7orf57
922	541.822	-2.68813	0.286391	-5.8945	3.75808e-09	8.57593e-08	ENSG00000171617	8507	ENC1
923	210.656	-1.81517	0.138353	-5.89196	3.81637e-09	8.6995e-08	ENSG00000151725	79682	CENPU
924	934.274	1.52572	0.089412	5.8798	4.1076e-09	9.35324e-08	ENSG00000172269	1798	DPAGT1
925	734.972	1.6816	0.115956	5.87811	4.14966e-09	9.4388e-08	ENSG00000143751	NA	SDE2
926	705.826	1.63913	0.108779	5.87546	4.21668e-09	9.58088e-08	ENSG00000123395	60673	ATG101
927	134.557	-2.15668	0.19688	-5.87506	4.22679e-09	9.5935e-08	ENSG00000146122	23500	DAAM2
928	84.7228	2.58153	0.26938	5.87103	4.33107e-09	9.81957e-08	ENSG00000130707	445	ASS1
929	4811.34	1.46091	0.0785155	5.87028	4.35064e-09	9.84807e-08	ENSG00000113739	8614	STC2
930	80.2675	-3.91544	0.496651	-5.87019	4.353e-09	9.84807e-08	ENSG00000100065	29775	CARD10
931	201.783	-1.80301	0.137044	-5.85952	4.64219e-09	1.04911e-07	ENSG00000126351	7067	THRA
932	2048.55	-1.67817	0.11593	-5.84978	4.92224e-09	1.1112e-07	ENSG00000188157	375790	AGRN
933	126.907	2.23663	0.21152	5.84643	5.02246e-09	1.13261e-07	ENSG00000073605	55876	GSDMB
934	117.662	-2.13985	0.194986	-5.84581	5.04101e-09	1.13558e-07	ENSG00000188483	389792	IER5L
935	27.4726	-3.32503	0.397784	-5.84496	5.06677e-09	1.14016e-07	ENSG00000261553	NA
936	531.441	-1.64595	0.110559	-5.84255	5.14079e-09	1.15558e-07	ENSG00000072571	3161	HMMR
937	3780.39	1.5361	0.091766	5.84205	5.15622e-09	1.15781e-07	ENSG00000125304	9375	TM9SF2
938	61.5522	-2.42061	0.243331	-5.8382	5.27687e-09	1.18364e-07	ENSG00000132016	79173	BRME1
939	564.893	-2.22317	0.209565	-5.8367	5.32443e-09	1.19304e-07	ENSG00000137936	8412	BCAR3
940	165.689	2.1609	0.19903	5.83282	5.44992e-09	1.21985e-07	ENSG00000181690	5324	PLAG1
941	549.991	1.64609	0.110832	5.82941	5.56228e-09	1.24368e-07	ENSG00000103494	23322	RPGRIP1L
942	340.387	-1.67955	0.116801	-5.81799	5.95602e-09	1.3303e-07	ENSG00000178999	9212	AURKB
943	368.737	-2.33276	0.229135	-5.81651	6.00906e-09	1.34073e-07	ENSG00000122870	80114	BICC1
944	416.789	1.70043	0.120459	5.81467	6.07526e-09	1.35406e-07	ENSG00000027697	3459	IFNGR1
945	205.728	-1.91596	0.157685	-5.80882	6.29152e-09	1.40078e-07	ENSG00000145284	79966	SCD5
946	1549.4	1.55218	0.0951386	5.80391	6.47874e-09	1.44094e-07	ENSG00000101654	8731	RNMT
947	165.779	-2.02907	0.17745	-5.79921	6.66263e-09	1.48027e-07	ENSG00000128578	57464	STRIP2
948	59.3629	2.89712	0.327229	5.79753	6.73001e-09	1.49366e-07	ENSG00000172476	142684	RAB40A
949	449.535	-1.68402	0.118031	-5.79521	6.82341e-09	1.5128e-07	ENSG00000163507	57650	CIP2A
950	831.887	-2.10427	0.19062	-5.79306	6.91173e-09	1.53077e-07	ENSG00000163171	10602	CDC42EP3
951	1009.27	-1.55274	0.0954774	-5.78919	7.07273e-09	1.56478e-07	ENSG00000137812	57082	KNL1
952	1746.05	-2.45553	0.251454	-5.78845	7.10383e-09	1.57001e-07	ENSG00000115419	2744	GLS
953	1053.87	1.61924	0.106982	5.78822	7.1137e-09	1.57054e-07	ENSG00000119844	54812	AFTPH
954	62.6092	4.94325	0.68134	5.78749	7.14439e-09	1.57566e-07	ENSG00000164266	6690	SPINK1
955	196.257	2.01029	0.174575	5.78715	7.15917e-09	1.57727e-07	ENSG00000286381	105373085
956	36.8852	-2.705	0.294645	-5.78662	7.1816e-09	1.58055e-07	ENSG00000171873	146	ADRA1D
957	369.646	1.73793	0.127567	5.78461	7.26798e-09	1.59623e-07	ENSG00000166435	143570	XRRA1
958	1413.69	-1.59535	0.102918	-5.78475	7.26193e-09	1.59623e-07	ENSG00000065054	9351	SLC9A3R2
959	387.325	-1.58692	0.101566	-5.77867	7.52928e-09	1.65189e-07	ENSG00000137802	23005	MAPKBP1
960	177.784	-2.87478	0.32464	-5.77496	7.69695e-09	1.68692e-07	ENSG00000165434	283209	PGM2L1
961	136.806	-2.012	0.175473	-5.76728	8.0559e-09	1.76375e-07	ENSG00000159433	57519	STARD9
962	4529.82	1.41364	0.0717264	5.76689	8.07457e-09	1.766e-07	ENSG00000198380	2673	GFPT1
963	506.962	-1.56535	0.0980571	-5.76557	8.13825e-09	1.77808e-07	ENSG00000205476	NA	CCDC85C
964	705.541	-1.50782	0.0880906	-5.76474	8.17821e-09	1.78495e-07	ENSG00000073111	4171	MCM2
965	221.275	2.01609	0.176336	5.76223	8.30119e-09	1.80992e-07	ENSG00000213199	9311	ASIC3
966	102.405	-2.09745	0.190525	-5.76012	8.40526e-09	1.83071e-07	ENSG00000177706	56975	FAM20C
967	5965.75	1.39102	0.067952	5.75429	8.70064e-09	1.89208e-07	ENSG00000106636	10652	YKT6
968	479.617	-1.69495	0.120773	-5.75421	8.70499e-09	1.89208e-07	ENSG00000148400	4851	NOTCH1
969	74.3687	2.61757	0.28117	5.753	8.76726e-09	1.90365e-07	ENSG00000069188	54549	SDK2
970	316.334	-1.77191	0.134237	-5.75034	8.90643e-09	1.93187e-07	ENSG00000158406	8365	H4C8
971	4431.24	-2.35926	0.23641	-5.74959	8.94601e-09	1.93846e-07	ENSG00000150687	11098	PRSS23
972	64.559	-2.53353	0.266823	-5.74738	9.06383e-09	1.96196e-07	ENSG00000137273	2295	FOXF2
973	26.4051	-3.10746	0.36717	-5.73975	9.48151e-09	2.05027e-07	ENSG00000122367	11155	LDB3
974	69.9285	-2.30156	0.22682	-5.7383	9.56317e-09	2.0658e-07	ENSG00000175643	NA	RMI2
975	72.2118	-2.34261	0.234238	-5.73181	9.9366e-09	2.14427e-07	ENSG00000281398	NA	SNHG4
976	1461.03	-2.44683	0.252691	-5.72567	1.03023e-08	2.22091e-07	ENSG00000139926	122786	FRMD6
977	1308.1	-1.55651	0.0972601	-5.72187	1.05359e-08	2.26893e-07	ENSG00000140564	5045	FURIN
978	491.931	-1.67649	0.118345	-5.71622	1.08917e-08	2.34317e-07	ENSG00000288859	723790	H2AC19
979	130.901	-2.83643	0.321377	-5.71425	1.10187e-08	2.36805e-07	ENSG00000277758	102724488
980	1421.08	1.57958	0.101595	5.70477	1.16499e-08	2.50115e-07	ENSG00000070061	8518	ELP1
981	326.942	1.80721	0.14152	5.70381	1.1716e-08	2.51279e-07	ENSG00000257727	10330	CNPY2
982	1820.24	1.50967	0.089487	5.69547	1.23036e-08	2.63612e-07	ENSG00000197150	11194	ABCB8
983	71.2275	-2.25059	0.219636	-5.69394	1.24144e-08	2.65717e-07	ENSG00000163545	81788	NUAK2
984	6725.62	-1.56087	0.0985256	-5.69268	1.2506e-08	2.67406e-07	ENSG00000151914	667	DST
985	32.4027	7.85111	1.20621	5.67986	1.34801e-08	2.87941e-07	ENSG00000211892	NA	IGHG4
986	56.8569	-2.42523	0.251011	-5.67795	1.36316e-08	2.90882e-07	ENSG00000114790	26084	ARHGEF26
987	79.8848	2.52586	0.268858	5.67534	1.3841e-08	2.95051e-07	ENSG00000197405	728	C5AR1
988	109.214	-2.95173	0.344392	-5.66717	1.45174e-08	3.09155e-07	ENSG00000148848	8038	ADAM12
989	829.75	1.58741	0.103656	5.66685	1.4545e-08	3.0943e-07	ENSG00000104522	7264	GFUS
990	641.903	-1.54028	0.0954263	-5.66172	1.49865e-08	3.185e-07	ENSG00000205726	6453	ITSN1
991	656.103	1.61034	0.107961	5.65335	1.57355e-08	3.34081e-07	ENSG00000263465	10929	SRSF8
992	712.08	-1.52193	0.0923271	-5.65304	1.57631e-08	3.34331e-07	ENSG00000169992	57555	NLGN2
993	303.29	-1.87202	0.154591	-5.64077	1.69289e-08	3.58335e-07	ENSG00000173068	54796	BNC2
994	2729.05	-1.5776	0.102397	-5.64081	1.69256e-08	3.58335e-07	ENSG00000105329	7040	TGFB1
995	63.9907	-2.29004	0.228797	-5.63836	1.71674e-08	3.63018e-07	ENSG00000198324	144717	PHETA1
996	77.0881	2.49868	0.266189	5.63015	1.80048e-08	3.80343e-07	ENSG00000115267	64135	IFIH1
997	327.013	1.78561	0.139541	5.62996	1.80247e-08	3.8038e-07	ENSG00000163156	79005	SCNM1
998	327.013	1.78561	0.139541	5.62996	1.80247e-08	3.8038e-07	ENSG00000163156	100534012	SCNM1
999	72.4304	-2.49639	0.265842	-5.62888	1.81386e-08	3.824e-07	ENSG00000275221	8330	H2AC15
1000	23.7484	-3.53109	0.449697	-5.62844	1.81847e-08	3.82605e-07	ENSG00000276410	3018	H2BC3
1001	50.164	3.16074	0.383886	5.62859	1.81684e-08	3.82605e-07	ENSG00000123329	64333	ARHGAP9
1002	383.517	1.77039	0.137018	5.62255	1.88158e-08	3.95489e-07	ENSG00000186814	100101467	ZSCAN30
1003	286.51	-1.75744	0.134849	-5.61696	1.94351e-08	4.08098e-07	ENSG00000135451	10024	TROAP
1004	1368.45	1.47432	0.0844534	5.6164	1.94972e-08	4.08993e-07	ENSG00000148229	54107	POLE3
1005	256.684	1.86943	0.154824	5.61559	1.95897e-08	4.10525e-07	ENSG00000100151	9463	PICK1
1006	53.3491	-2.38415	0.246579	-5.61341	1.98381e-08	4.15318e-07	ENSG00000029534	286	ANK1
1007	2454.99	-1.38553	0.0686915	-5.61246	1.99467e-08	4.17176e-07	ENSG00000109685	7468	NSD2
1008	27.7659	7.8106	1.21377	5.61111	2.01038e-08	4.20043e-07	ENSG00000125522	2832	NPBWR2
1009	352.698	-1.71425	0.127339	-5.60906	2.03431e-08	4.24622e-07	ENSG00000158373	3017	H2BC5
1010	2048.09	-1.41364	0.0737965	-5.60508	2.08158e-08	4.34059e-07	ENSG00000149639	140710	SOGA1
1011	645.512	1.5862	0.104646	5.60172	2.1223e-08	4.4211e-07	ENSG00000136052	84102	SLC41A2
1012	1061.19	1.54215	0.0968393	5.59844	2.16287e-08	4.50117e-07	ENSG00000174851	10897	YIF1A
1013	122.276	-1.89187	0.159562	-5.5895	2.27724e-08	4.73449e-07	ENSG00000175505	23529	CLCF1
1014	31.086	-3.08612	0.373599	-5.58386	2.35241e-08	4.88595e-07	ENSG00000203706	NA	SERTAD4-AS1
1015	462.477	1.76139	0.136364	5.58355	2.35659e-08	4.88981e-07	ENSG00000179163	2517	FUCA1
1016	102.907	2.44285	0.258592	5.57963	2.41025e-08	4.99621e-07	ENSG00000136866	7539	ZFP37
1017	441.379	1.66518	0.119246	5.57821	2.43001e-08	5.03224e-07	ENSG00000158480	9825	SPATA2
1018	156.838	1.98973	0.177445	5.57767	2.43767e-08	5.03817e-07	ENSG00000168404	197259	MLKL
1019	266.203	1.75982	0.136222	5.57778	2.43608e-08	5.03817e-07	ENSG00000269343	100293516	ZNF587B
1020	194.038	-2.83875	0.329842	-5.57464	2.48041e-08	5.12002e-07	ENSG00000124496	55809	TRERF1
1021	1254.69	-1.57061	0.102361	-5.57452	2.48214e-08	5.12002e-07	ENSG00000214049	NA	UCA1
1022	470.94	-1.57029	0.102344	-5.57223	2.51504e-08	5.18281e-07	ENSG00000167670	10036	CHAF1A
1023	499.586	1.66579	0.119551	5.56915	2.5599e-08	5.26493e-07	ENSG00000155744	285172	FAM126B
1024	179.898	1.92536	0.166154	5.56929	2.55774e-08	5.26493e-07	ENSG00000258927	NA
1025	463.497	1.69131	0.124154	5.56815	2.57457e-08	5.28995e-07	ENSG00000124313	23096	IQSEC2
1026	108.986	-2.05579	0.189637	-5.56745	2.5849e-08	5.30599e-07	ENSG00000264230	728113	ANXA8L1
1027	365.847	-1.73555	0.132194	-5.56418	2.63391e-08	5.40132e-07	ENSG00000186260	57496	MRTFB
1028	149.644	-2.02539	0.184357	-5.56197	2.66743e-08	5.46473e-07	ENSG00000142279	126374	WTIP
1029	38.7138	5.23251	0.76105	5.56141	2.6761e-08	5.47716e-07	ENSG00000285765	NA	FAM90A23P
1030	73.6326	-2.17711	0.211727	-5.55956	2.7046e-08	5.5301e-07	ENSG00000160447	29941	PKN3
1031	305.235	-3.10811	0.37936	-5.55702	2.74415e-08	5.60552e-07	ENSG00000135074	8728	ADAM19
1032	777.455	-1.47697	0.0858441	-5.55621	2.75693e-08	5.62616e-07	ENSG00000169764	7360	UGP2
1033	522.266	-1.73978	0.133311	-5.54928	2.8685e-08	5.84819e-07	ENSG00000108854	64750	SMURF2
1034	215.59	-1.75032	0.135322	-5.54472	2.94425e-08	5.9968e-07	ENSG00000100526	1033	CDKN3
1035	80.3791	-2.2002	0.216818	-5.53549	3.1036e-08	6.31526e-07	ENSG00000150764	85458	DIXDC1
1036	398.803	-1.8669	0.156752	-5.5304	3.19493e-08	6.49481e-07	ENSG00000113594	3977	LIFR
1037	2926.38	1.43847	0.0793424	5.52628	3.27097e-08	6.64297e-07	ENSG00000141252	55275	VPS53
1038	37.4889	4.82822	0.694151	5.51497	3.48845e-08	7.07782e-07	ENSG00000205927	10215	OLIG2
1039	1809.66	1.45317	0.0821803	5.51438	3.50003e-08	7.09447e-07	ENSG00000118873	25782	RAB3GAP2
1040	21.1552	-3.44693	0.443866	-5.51278	3.53219e-08	7.15276e-07	ENSG00000212724	730755	KRTAP2-3
1041	58.9139	2.7467	0.316901	5.51181	3.5516e-08	7.18141e-07	ENSG00000165071	137835	TMEM71
1042	724.234	1.6063	0.110002	5.51173	3.55316e-08	7.18141e-07	ENSG00000101457	116092	DNTTIP1
1043	3764.24	-1.43386	0.0788141	-5.50489	3.69408e-08	7.45216e-07	ENSG00000163931	7086	TKT
1044	63.5486	-2.31571	0.239009	-5.50488	3.6942e-08	7.45216e-07	ENSG00000104368	5327	PLAT
1045	4130.85	1.41158	0.0747698	5.50462	3.6996e-08	7.45589e-07	ENSG00000127914	10142	AKAP9
1046	488.616	-1.72803	0.132287	-5.50345	3.72431e-08	7.49852e-07	ENSG00000169499	59339	PLEKHA2
1047	942.412	-1.54747	0.0995302	-5.50054	3.78622e-08	7.61588e-07	ENSG00000173517	79834	PEAK1
1048	328.399	1.76627	0.139347	5.49901	3.81923e-08	7.67494e-07	ENSG00000278318	7772	ZNF229
1049	374.207	-2.53289	0.278887	-5.49647	3.87476e-08	7.7791e-07	ENSG00000107104	23189	KANK1
1050	504.71	-1.66158	0.120535	-5.48869	4.04918e-08	8.12153e-07	ENSG00000275216	NA
1051	491.862	-1.70281	0.128084	-5.48711	4.08572e-08	8.187e-07	ENSG00000197061	8364	H4C3
1052	1517.86	1.43996	0.0801837	5.48691	4.09032e-08	8.18842e-07	ENSG00000115275	NA	MOGS
1053	86.7699	-3.9716	0.541663	-5.48607	4.10966e-08	8.21932e-07	ENSG00000082497	56256	SERTAD4
1054	108.916	2.19505	0.217946	5.48325	4.1758e-08	8.34367e-07	ENSG00000255874	283487	PRECSIT
1055	73.8858	-2.2282	0.224127	-5.47992	4.25527e-08	8.4944e-07	ENSG00000283154	29970	IQCJ-SCHIP1
1056	73.8858	-2.2282	0.224127	-5.47992	4.25527e-08	8.4944e-07	ENSG00000283154	100505385	IQCJ-SCHIP1
1057	755.773	1.60632	0.110678	5.47822	4.29629e-08	8.56815e-07	ENSG00000161996	NA	WDR90
1058	471.673	-1.62257	0.113651	-5.47793	4.30337e-08	8.57415e-07	ENSG00000155760	8324	FZD7
1059	118.015	-1.98639	0.180132	-5.47592	4.35246e-08	8.66375e-07	ENSG00000162636	284611	FAM102B
1060	44.0456	3.43321	0.444437	5.47481	4.37971e-08	8.70975e-07	ENSG00000229431	NA	MED8-AS1
1061	148.272	-2.68262	0.307481	-5.47226	4.4432e-08	8.82767e-07	ENSG00000162407	8613	PLPP3
1062	187.475	-1.8552	0.156319	-5.4709	4.47758e-08	8.88757e-07	ENSG00000168005	144097	SPINDOC
1063	260.648	-1.83145	0.151982	-5.47073	4.48182e-08	8.8876e-07	ENSG00000118515	6446	SGK1
1064	788.132	-1.68386	0.125098	-5.46654	4.58894e-08	9.09145e-07	ENSG00000169908	4071	TM4SF1
1065	130.264	-2.01802	0.186279	-5.46506	4.62757e-08	9.15937e-07	ENSG00000023697	51071	DERA
1066	124.781	-1.97733	0.179025	-5.45916	4.78402e-08	9.46013e-07	ENSG00000069011	5307	PITX1
1067	859.946	-1.43761	0.080213	-5.45556	4.88183e-08	9.64448e-07	ENSG00000134030	9811	CTIF
1068	68.8577	2.69796	0.311257	5.45517	4.89267e-08	9.65682e-07	ENSG00000186409	728621	CCDC30
1069	2692.22	-1.66174	0.121343	-5.45344	4.94042e-08	9.73281e-07	ENSG00000137962	9411	ARHGAP29
1070	106.668	2.2876	0.236106	5.45347	4.93976e-08	9.73281e-07	ENSG00000168826	166793	ZBTB49
1071	63.5251	2.83804	0.337207	5.45076	5.01561e-08	9.87169e-07	ENSG00000184185	3768	KCNJ12
1072	1034.71	-2.43199	0.262977	-5.44531	5.17152e-08	1.01631e-06	ENSG00000144824	90102	PHLDB2
1073	236.921	-1.68552	0.125894	-5.44525	5.17333e-08	1.01631e-06	ENSG00000156026	90550	MCU
1074	555.007	-2.13863	0.209456	-5.43613	5.44516e-08	1.06857e-06	ENSG00000162722	25893	TRIM58
1075	2454.58	-1.5253	0.096634	-5.43598	5.44953e-08	1.06857e-06	ENSG00000231991	NA	ANXA2P2
1076	760.754	-2.39525	0.256905	-5.43099	5.60425e-08	1.09789e-06	ENSG00000138623	8482	SEMA7A
1077	62.2766	-2.2857	0.236766	-5.43023	5.62807e-08	1.10153e-06	ENSG00000272734	NA	ADIRF-AS1
1078	40.0157	-2.57023	0.289529	-5.4234	5.84755e-08	1.14342e-06	ENSG00000099282	23555	TSPAN15
1079	53.9219	4.02247	0.557402	5.42242	5.87979e-08	1.14866e-06	ENSG00000169302	202374	STK32A
1080	285.539	1.85794	0.158261	5.42106	5.92454e-08	1.15633e-06	ENSG00000169249	8233	ZRSR2
1081	742.212	1.60959	0.112462	5.42038	5.9471e-08	1.15966e-06	ENSG00000166848	54386	TERF2IP
1082	248.321	-1.70903	0.130846	-5.41886	5.99809e-08	1.16852e-06	ENSG00000080839	5933	RBL1
1083	60.9806	2.94901	0.359734	5.41791	6.0299e-08	1.17363e-06	ENSG00000150627	116966	WDR17
1084	22.1211	-3.20814	0.407807	-5.41468	6.13987e-08	1.19393e-06	ENSG00000267886	NA
1085	292.577	-1.64353	0.118953	-5.40994	6.30446e-08	1.2248e-06	ENSG00000261801	100287616	LOXL1-AS1
1086	144.352	2.04368	0.192973	5.40842	6.3584e-08	1.23414e-06	ENSG00000079337	10411	RAPGEF3
1087	485.792	-1.55097	0.101882	-5.40787	6.37791e-08	1.23679e-06	ENSG00000162591	1953	MEGF6
1088	248.278	1.85354	0.157913	5.40513	6.4763e-08	1.25471e-06	ENSG00000172007	83452	RAB33B
1089	480.886	-2.52788	0.28344	-5.39049	7.02657e-08	1.36007e-06	ENSG00000049130	4254	KITLG
1090	46.6559	7.47859	1.20273	5.38659	7.18088e-08	1.38866e-06	ENSG00000186205	64757	MTARC1
1091	52.2467	2.99091	0.369915	5.38208	7.36286e-08	1.42254e-06	ENSG00000174628	124152	IQCK
1092	69.4131	6.60088	1.04111	5.37973	7.45968e-08	1.43992e-06	ENSG00000122787	6718	AKR1D1
1093	74.9898	-2.10698	0.205914	-5.37595	7.61802e-08	1.46842e-06	ENSG00000213347	83463	MXD3
1094	483.674	-1.59553	0.110782	-5.37571	7.62823e-08	1.46842e-06	ENSG00000126787	9787	DLGAP5
1095	1679.31	1.50808	0.0945125	5.37582	7.62341e-08	1.46842e-06	ENSG00000013275	5704	PSMC4
1096	39.0071	3.23809	0.416835	5.36925	7.90668e-08	1.52063e-06	ENSG00000177363	221091	LRRN4CL
1097	1821.39	-1.58541	0.109212	-5.3603	8.30851e-08	1.59645e-06	ENSG00000273542	8362	H4C12
1098	42.9522	-2.48727	0.277816	-5.35342	8.63068e-08	1.65684e-06	ENSG00000241547	NA	ACTG1P20
1099	274.489	-1.73364	0.1371	-5.35113	8.7405e-08	1.67639e-06	ENSG00000102302	NA	FGD1
1100	228.636	-2.57342	0.294203	-5.34808	8.88904e-08	1.70333e-06	ENSG00000112773	55603	TENT5A
1101	1914.38	1.50744	0.0949823	5.34249	9.16778e-08	1.75514e-06	ENSG00000141644	4152	MBD1
1102	167.988	-2.65471	0.310097	-5.3361	9.49658e-08	1.81644e-06	ENSG00000176697	627	BDNF
1103	38.7481	4.67224	0.689028	5.3296	9.84311e-08	1.88101e-06	ENSG00000181652	285973	ATG9B
1104	68.3467	2.56682	0.294287	5.32411	1.01447e-07	1.93689e-06	ENSG00000170909	126014	OSCAR
1105	977.074	-1.53287	0.100187	-5.31878	1.04466e-07	1.99272e-06	ENSG00000138778	1062	CENPE
1106	840.946	1.55087	0.10362	5.31629	1.05905e-07	2.01834e-06	ENSG00000109065	26151	NAT9
1107	270.337	1.80136	0.150929	5.3095	1.09929e-07	2.09312e-06	ENSG00000105948	79989	TTC26
1108	504.504	1.63807	0.120246	5.30634	1.11846e-07	2.1277e-06	ENSG00000138433	NA	CIR1
1109	299.674	-1.71696	0.135151	-5.30489	1.1274e-07	2.14277e-06	ENSG00000253276	168455	CCDC71L
1110	579.332	1.5894	0.11132	5.29467	1.19232e-07	2.26412e-06	ENSG00000134058	1022	CDK7
1111	911.126	-1.46782	0.0883658	-5.29414	1.19576e-07	2.2686e-06	ENSG00000164104	3148	HMGB2
1112	34.9679	-2.64505	0.310828	-5.29248	1.2067e-07	2.2873e-06	ENSG00000163485	134	ADORA1
1113	3683.36	1.36779	0.0695105	5.29118	1.21529e-07	2.3015e-06	ENSG00000128272	468	ATF4
1114	30.0473	-2.8356	0.34711	-5.28823	1.23502e-07	2.33677e-06	ENSG00000187714	6572	SLC18A3
1115	805.06	-1.4422	0.0837524	-5.2798	1.29324e-07	2.44473e-06	ENSG00000127589	NA	TUBBP1
1116	247.393	-1.82705	0.156715	-5.27743	1.31009e-07	2.47435e-06	ENSG00000203805	196051	PLPP4
1117	94.1578	2.39934	0.265177	5.27698	1.31328e-07	2.47816e-06	ENSG00000288187	NA
1118	953.545	-1.63894	0.121226	-5.27066	1.35938e-07	2.56284e-06	ENSG00000168461	11031	RAB31
1119	174.058	1.89486	0.170026	5.2631	1.41649e-07	2.66813e-06	ENSG00000132906	842	CASP9
1120	950.95	-1.50085	0.0951678	-5.26283	1.41853e-07	2.66958e-06	ENSG00000243156	57553	MICAL3
1121	1454.04	-1.50996	0.0969464	-5.26019	1.43904e-07	2.70576e-06	ENSG00000013810	10460	TACC3
1122	4688.53	-1.4641	0.0883707	-5.2518	1.50623e-07	2.82955e-06	ENSG00000038382	7204	TRIO
1123	87.5024	-3.59446	0.494176	-5.25008	1.52036e-07	2.85356e-06	ENSG00000117228	2633	GBP1
1124	125.297	-1.92501	0.176227	-5.24898	1.52947e-07	2.8681e-06	ENSG00000029993	3149	HMGB3
1125	515.72	-2.86424	0.355224	-5.24808	1.53695e-07	2.877e-06	ENSG00000275342	NA	PRAG1
1126	649.751	-1.59295	0.112981	-5.24821	1.53588e-07	2.877e-06	ENSG00000151491	2059	EPS8
1127	252.578	1.77058	0.146848	5.24747	1.542e-07	2.88389e-06	ENSG00000136732	2995	GYPC
1128	99.0761	-1.97375	0.185607	-5.24628	1.552e-07	2.9e-06	ENSG00000179958	79077	DCTPP1
1129	502.945	-1.5924	0.113015	-5.24178	1.59033e-07	2.96898e-06	ENSG00000198826	9824	ARHGAP11A
1130	723.816	-1.53438	0.101966	-5.24075	1.59929e-07	2.98307e-06	ENSG00000130749	23211	ZC3H4
1131	355.674	-1.65427	0.124869	-5.23967	1.60865e-07	2.99788e-06	ENSG00000110719	10312	TCIRG1
1132	213.115	1.81809	0.156201	5.23742	1.62835e-07	3.03191e-06	ENSG00000241127	57002	YAE1
1133	33.491	-2.66575	0.318079	-5.23692	1.63281e-07	3.03752e-06	ENSG00000196196	NA	HRCT1
1134	420.323	-1.56238	0.107531	-5.2299	1.69603e-07	3.15235e-06	ENSG00000196581	55966	AJAP1
1135	51.8175	-2.40726	0.269159	-5.22836	1.7102e-07	3.17587e-06	ENSG00000069702	7049	TGFBR3
1136	321.995	-1.72378	0.138456	-5.22748	1.71833e-07	3.18815e-06	ENSG00000244509	27350	APOBEC3C
1137	720.735	-1.49889	0.0956168	-5.21756	1.81291e-07	3.36068e-06	ENSG00000101361	10528	NOP56
1138	198.555	-1.71323	0.136782	-5.21434	1.84472e-07	3.41663e-06	ENSG00000133935	11161	ERG28
1139	88.9511	-2.17349	0.225132	-5.21246	1.86348e-07	3.44835e-06	ENSG00000100302	23551	RASD2
1140	67.984	-3.5059	0.481259	-5.20697	1.91954e-07	3.54895e-06	ENSG00000280435	NA
1141	110.666	-2.88575	0.362265	-5.20543	1.93543e-07	3.57519e-06	ENSG00000285294	643650	LINC00842
1142	634.568	-1.59951	0.11519	-5.20452	1.94502e-07	3.58976e-06	ENSG00000111602	8914	TIMELESS
1143	9442.84	-1.46199	0.0887718	-5.20424	1.94787e-07	3.59186e-06	ENSG00000150938	51232	CRIM1
1144	100.53	-1.98562	0.18942	-5.20336	1.95714e-07	3.6058e-06	ENSG00000274290	8344	H2BC6
1145	534.258	1.61888	0.118971	5.20188	1.97283e-07	3.63152e-06	ENSG00000138660	55435	AP1AR
1146	24.4211	-2.90093	0.365523	-5.20059	1.98662e-07	3.65371e-06	ENSG00000068615	65055	REEP1
1147	51.6653	2.94908	0.374832	5.19987	1.99426e-07	3.66456e-06	ENSG00000260923	NA	LINC02193
1148	416.99	-1.59006	0.113555	-5.19627	2.03322e-07	3.73289e-06	ENSG00000167674	84717	HDGFL2
1149	164.816	-1.80048	0.154057	-5.19598	2.0364e-07	3.73548e-06	ENSG00000112312	51053	GMNN
1150	33.4903	3.48335	0.47819	5.19323	2.06678e-07	3.78789e-06	ENSG00000164342	7098	TLR3
1151	23.8515	7.32659	1.21831	5.19292	2.07024e-07	3.79094e-06	ENSG00000287796	NA
1152	536.149	1.59018	0.113816	5.18536	2.15593e-07	3.94442e-06	ENSG00000204524	390980	ZNF805
1153	135.027	-1.82182	0.158563	-5.18294	2.18411e-07	3.9925e-06	ENSG00000251322	85358	SHANK3
1154	1639.56	-1.52474	0.101277	-5.18126	2.20394e-07	4.02526e-06	ENSG00000169604	84168	ANTXR1
1155	34.9374	-2.6056	0.31003	-5.17886	2.2324e-07	4.0737e-06	ENSG00000275016	NA
1156	546.789	1.57613	0.111268	5.17783	2.24479e-07	4.09276e-06	ENSG00000147535	84513	PLPP5
1157	188.183	1.865	0.16711	5.17622	2.26427e-07	4.12469e-06	ENSG00000204344	8859	STK19
1158	76.5526	-2.01384	0.196192	-5.16758	2.37145e-07	4.3162e-06	ENSG00000183250	84536	LINC01547
1159	100.515	-2.06097	0.205545	-5.16172	2.44692e-07	4.44972e-06	ENSG00000166803	9768	PCLAF
1160	3572.84	1.41217	0.079979	5.15352	2.55647e-07	4.64491e-06	ENSG00000102580	5611	DNAJC3
1161	27.5182	4.96589	0.769997	5.15052	2.5976e-07	4.71558e-06	ENSG00000250366	NA	TUNAR
1162	802.444	-1.5374	0.104485	-5.14334	2.69892e-07	4.89528e-06	ENSG00000114346	1894	ECT2
1163	125.747	-1.82919	0.161353	-5.139	2.76211e-07	5.00559e-06	ENSG00000125657	8744	TNFSF9
1164	371.509	1.69833	0.135906	5.13834	2.77171e-07	5.01866e-06	ENSG00000198393	7574	ZNF26
1165	21.6458	-3.29425	0.447333	-5.12874	2.91682e-07	5.27685e-06	ENSG00000133107	7223	TRPC4
1166	91.6535	-1.954	0.186459	-5.1164	3.11427e-07	5.62924e-06	ENSG00000250992	NA
1167	18.865	-3.25574	0.440922	-5.11597	3.12139e-07	5.63727e-06	ENSG00000242242	NA	NECTIN3-AS1
1168	72.288	-2.10937	0.217198	-5.10763	3.26232e-07	5.88673e-06	ENSG00000154330	NA	PGM5
1169	1329.3	1.41924	0.0821314	5.10454	3.31608e-07	5.97472e-06	ENSG00000166170	9529	BAG5
1170	565.142	1.54862	0.107477	5.1045	3.31677e-07	5.97472e-06	ENSG00000261824	148189	LINC00662
1171	279.267	-1.60617	0.118832	-5.10106	3.37759e-07	6.07909e-06	ENSG00000087448	57542	KLHL42
1172	467.758	1.59443	0.116549	5.10022	3.39265e-07	6.10098e-06	ENSG00000178397	NA	FAM220A
1173	63.6378	-2.18544	0.232509	-5.09847	3.42418e-07	6.15241e-06	ENSG00000167074	7008	TEF
1174	442.16	-2.30871	0.257093	-5.09041	3.57299e-07	6.41432e-06	ENSG00000103196	83716	CRISPLD2
1175	274.467	1.78149	0.153557	5.08925	3.5948e-07	6.44797e-06	ENSG00000101624	79959	CEP76
1176	458.613	-1.64095	0.125961	-5.08849	3.60917e-07	6.46822e-06	ENSG00000137166	116113	FOXP4
1177	875.338	1.52934	0.104065	5.08659	3.64551e-07	6.52779e-06	ENSG00000185344	23545	ATP6V0A2
1178	346.569	-1.70179	0.137997	-5.08553	3.66595e-07	6.5588e-06	ENSG00000169439	6383	SDC2
1179	751.28	1.55625	0.109447	5.0824	3.72701e-07	6.66239e-06	ENSG00000108406	79665	DHX40
1180	122.888	-1.91508	0.180272	-5.07613	3.85201e-07	6.88e-06	ENSG00000165895	143872	ARHGAP42
1181	1134.04	1.42837	0.0844001	5.0755	3.8648e-07	6.89698e-06	ENSG00000160058	55108	BSDC1
1182	2329.59	1.39413	0.0777083	5.07188	3.93914e-07	7.0118e-06	ENSG00000025796	11231	SEC63
1183	17.937	7.19674	1.22177	5.07194	3.9379e-07	7.0118e-06	ENSG00000129910	1013	CDH15
1184	200.664	1.90942	0.179302	5.07198	3.93692e-07	7.0118e-06	ENSG00000185869	374899	ZNF829
1185	225.027	-1.66978	0.132067	-5.07151	3.94673e-07	7.01938e-06	ENSG00000214391	NA	TUBAP2
1186	619.557	-1.52454	0.10344	-5.07092	3.95904e-07	7.03531e-06	ENSG00000162104	115	ADCY9
1187	329.411	-1.60326	0.11918	-5.06177	4.1539e-07	7.37536e-06	ENSG00000029153	56938	ARNTL2
1188	1150.16	1.43803	0.0865765	5.05945	4.20477e-07	7.4594e-06	ENSG00000198682	9060	PAPSS2
1189	690.661	1.57518	0.113742	5.05686	4.26213e-07	7.55478e-06	ENSG00000129071	8930	MBD4
1190	594.912	-3.18088	0.43216	-5.04647	4.50056e-07	7.97068e-06	ENSG00000122641	3624	INHBA
1191	243.036	-1.75476	0.149622	-5.0444	4.54958e-07	8.05072e-06	ENSG00000105245	9253	NUMBL
1192	637.811	1.57103	0.113238	5.04272	4.58972e-07	8.11494e-06	ENSG00000132376	51763	INPP5K
1193	496.285	-1.71698	0.142204	-5.04189	4.60946e-07	8.143e-06	ENSG00000198743	6526	SLC5A3
1194	175.874	-1.68208	0.13533	-5.04009	4.65309e-07	8.21317e-06	ENSG00000175866	10458	BAIAP2
1195	1435.69	1.48574	0.0964275	5.03732	4.72101e-07	8.32607e-06	ENSG00000166579	81565	NDEL1
1196	443.467	-1.63225	0.12555	-5.03579	4.75878e-07	8.38565e-06	ENSG00000111077	23371	TNS2
1197	24.0994	-2.9394	0.385272	-5.03384	4.80741e-07	8.46426e-06	ENSG00000213412	NA	HNRNPA1P33
1198	327.627	-1.69264	0.137644	-5.03211	4.8511e-07	8.53404e-06	ENSG00000148120	84909	AOPEP
1199	28.6474	-2.65269	0.32877	-5.02691	4.98455e-07	8.76148e-06	ENSG00000152284	83439	TCF7L1
1200	3912.72	-1.45415	0.0903494	-5.02661	4.99228e-07	8.76774e-06	ENSG00000110880	23603	CORO1C
1201	112.399	-1.94325	0.187686	-5.02566	5.01695e-07	8.80372e-06	ENSG00000186871	54821	ERCC6L
1202	20.044	7.13236	1.22074	5.02346	5.07496e-07	8.89809e-06	ENSG00000184515	340542	BEX5
1203	748.418	-2.57463	0.313545	-5.02203	5.11274e-07	8.95687e-06	ENSG00000149177	5795	PTPRJ
1204	73.8101	2.48249	0.295223	5.02161	5.12414e-07	8.96938e-06	ENSG00000141519	55036	CCDC40
1205	3657.59	1.32544	0.0648127	5.02118	5.13539e-07	8.9816e-06	ENSG00000182934	6734	SRPRA
1206	50.0409	-2.3676	0.272428	-5.02002	5.16655e-07	9.02858e-06	ENSG00000162892	11009	IL24
1207	314.518	-1.58798	0.1172	-5.01688	5.25167e-07	9.16972e-06	ENSG00000183722	10186	LHFPL6
1208	206.486	-2.48125	0.295565	-5.0116	5.3978e-07	9.41706e-06	ENSG00000163637	166336	PRICKLE2
1209	148.685	-3.28113	0.455291	-5.01027	5.43531e-07	9.47465e-06	ENSG00000261786	NA
1210	39.397	-2.60058	0.319805	-5.00486	5.5902e-07	9.73658e-06	ENSG00000175793	2810	SFN
1211	59.2862	-2.22711	0.245223	-5.00403	5.61436e-07	9.77056e-06	ENSG00000106123	2051	EPHB6
1212	461.004	-1.54867	0.109696	-5.00172	5.68217e-07	9.88039e-06	ENSG00000162302	8986	RPS6KA4
1213	28.3178	-2.70399	0.340826	-4.99958	5.74555e-07	9.97413e-06	ENSG00000253123	100507403
1214	923.559	1.54399	0.108804	4.99973	5.74119e-07	9.97413e-06	ENSG00000165813	55088	CCDC186
1215	424.249	1.55394	0.110909	4.99451	5.89867e-07	1.02231e-05	ENSG00000135750	3775	KCNK1
1216	150.135	-1.87627	0.175441	-4.99463	5.89475e-07	1.02231e-05	ENSG00000112208	NA	BAG2
1217	56.8848	-2.15969	0.232364	-4.99083	6.01216e-07	1.04112e-05	ENSG00000140451	80119	PIF1
1218	383.483	-1.74894	0.150098	-4.98969	6.04766e-07	1.0464e-05	ENSG00000251493	2297	FOXD1
1219	71.8024	-2.10883	0.222241	-4.98933	6.059e-07	1.0475e-05	ENSG00000204174	5540	NPY4R
1220	25.5739	-2.83973	0.368768	-4.98887	6.07346e-07	1.04914e-05	ENSG00000246859	100505678	STARD4-AS1
1221	635.756	1.50338	0.100914	4.98817	6.09524e-07	1.05204e-05	ENSG00000197077	85379	KIAA1671
1222	895.995	1.539	0.108159	4.98338	6.24818e-07	1.07755e-05	ENSG00000052723	80143	SIKE1
1223	39.8396	6.19515	1.04367	4.97775	6.43276e-07	1.10848e-05	ENSG00000148346	3934	LCN2
1224	2890.73	1.39885	0.0801596	4.97564	6.50315e-07	1.11969e-05	ENSG00000142552	57333	RCN3
1225	805.341	1.52909	0.106437	4.97087	6.6652e-07	1.14572e-05	ENSG00000113552	10007	GNPDA1
1226	1441.8	-2.00556	0.202288	-4.97092	6.66343e-07	1.14572e-05	ENSG00000198768	164284	APCDD1L
1227	45.2605	4.84336	0.773328	4.9699	6.69877e-07	1.15055e-05	ENSG00000167861	283987	HID1
1228	971.986	1.45906	0.0923946	4.96844	6.74923e-07	1.15827e-05	ENSG00000177542	79751	SLC25A22
1229	221.817	-1.90649	0.182493	-4.96722	6.79191e-07	1.16464e-05	ENSG00000164611	9232	PTTG1
1230	59.9301	-2.20709	0.243121	-4.96497	6.87104e-07	1.17629e-05	ENSG00000137460	85462	FHDC1
1231	813.131	1.5158	0.103886	4.96507	6.86761e-07	1.17629e-05	ENSG00000174485	10260	DENND4A
1232	348.637	1.75019	0.151159	4.96294	6.94355e-07	1.18678e-05	ENSG00000159314	201176	ARHGAP27
1233	554.869	-1.51331	0.103427	-4.96305	6.93932e-07	1.18678e-05	ENSG00000100304	23170	TTLL12
1234	36.9247	3.48167	0.500757	4.95584	7.202e-07	1.22995e-05	ENSG00000163406	6565	SLC15A2
1235	5578.74	-1.53156	0.107284	-4.95475	7.24242e-07	1.23585e-05	ENSG00000100644	3091	HIF1A
1236	43.4482	-2.44655	0.291975	-4.95437	7.2564e-07	1.23723e-05	ENSG00000175322	162655	ZNF519
1237	402.226	1.63966	0.129146	4.95296	7.30938e-07	1.24526e-05	ENSG00000132661	NA	NXT1
1238	24.8526	3.56514	0.517969	4.9523	7.33395e-07	1.24843e-05	ENSG00000101203	57642	COL20A1
1239	399.222	-1.50059	0.101186	-4.94723	7.52765e-07	1.28037e-05	ENSG00000147130	9203	ZMYM3
1240	76.8288	2.46734	0.297128	4.9384	7.87672e-07	1.33866e-05	ENSG00000105792	79846	CFAP69
1241	388.46	-1.54289	0.110027	-4.93412	8.05134e-07	1.36723e-05	ENSG00000121152	23397	NCAPH
1242	22.7477	-2.98259	0.401875	-4.93334	8.08346e-07	1.37158e-05	ENSG00000257167	100128191	TMPO-AS1
1243	2948.03	-1.41955	0.0850504	-4.93298	8.09862e-07	1.37305e-05	ENSG00000070614	3340	NDST1
1244	233.933	1.74705	0.151563	4.92898	8.26603e-07	1.4003e-05	ENSG00000205485	100133091
1245	33.9908	-2.59499	0.323692	-4.92748	8.32961e-07	1.40994e-05	ENSG00000106789	7464	CORO2A
1246	247.815	1.71336	0.144821	4.92578	8.40237e-07	1.42111e-05	ENSG00000121671	1408	CRY2
1247	331.523	1.63554	0.129054	4.92462	8.45259e-07	1.42731e-05	ENSG00000162642	148423	C1orf52
1248	46.2695	2.90298	0.386418	4.92466	8.45068e-07	1.42731e-05	ENSG00000177181	284716	RIMKLA
1249	30.6281	-2.62142	0.329769	-4.91683	8.79555e-07	1.48403e-05	ENSG00000114529	79669	C3orf52
1250	1339.78	1.50562	0.102872	4.91506	8.87555e-07	1.49633e-05	ENSG00000122741	79269	DCAF10
1251	111.58	-1.91749	0.186746	-4.91303	8.96786e-07	1.51068e-05	ENSG00000277778	595135	PGM5P2
1252	253.723	-1.60134	0.122415	-4.91228	9.00254e-07	1.51531e-05	ENSG00000188130	6300	MAPK12
1253	151.734	-1.90247	0.183768	-4.91094	9.06403e-07	1.52444e-05	ENSG00000121210	23240	TMEM131L
1254	163.211	-1.84183	0.171551	-4.90719	9.23888e-07	1.5526e-05	ENSG00000145287	51316	PLAC8
1255	36.5977	3.35252	0.479453	4.90668	9.26317e-07	1.55544e-05	ENSG00000171811	NA	CFAP46
1256	227.321	-2.68139	0.34277	-4.90529	9.32914e-07	1.56527e-05	ENSG00000167767	144501	KRT80
1257	342.797	-1.6093	0.124401	-4.89786	9.68876e-07	1.62432e-05	ENSG00000099204	3983	ABLIM1
1258	83.2248	-2.09278	0.223143	-4.89722	9.72036e-07	1.62831e-05	ENSG00000104783	3783	KCNN4
1259	179.988	-1.72706	0.14875	-4.88782	1.01958e-06	1.7066e-05	ENSG00000160145	8997	KALRN
1260	306.241	-1.63778	0.130515	-4.88662	1.0258e-06	1.71565e-05	ENSG00000154237	NA	LRRK1
1261	74.977	-2.0131	0.207366	-4.88556	1.03138e-06	1.72361e-05	ENSG00000253161	NA	LINC01605
1262	454.682	1.54037	0.110699	4.88143	1.05318e-06	1.75865e-05	ENSG00000148399	92715	DPH7
1263	565.083	1.53649	0.109965	4.87874	1.06765e-06	1.78139e-05	ENSG00000214176	NA	PLEKHM1P1
1264	203.446	-1.71719	0.147211	-4.87184	1.10561e-06	1.84327e-05	ENSG00000174791	9610	RIN1
1265	2387.48	1.38425	0.0789884	4.86463	1.1467e-06	1.91026e-05	ENSG00000213699	NA	SLC35F6
1266	859.101	-1.90825	0.186739	-4.86376	1.15176e-06	1.91716e-05	ENSG00000203485	64423	INF2
1267	1102.33	1.45258	0.0930821	4.86214	1.16121e-06	1.93137e-05	ENSG00000135040	60560	NAA35
1268	1573.06	-1.47701	0.0982312	-4.856	1.19784e-06	1.99072e-05	ENSG00000124207	1434	CSE1L
1269	113.076	2.00093	0.206284	4.8522	1.22101e-06	2.02762e-05	ENSG00000171160	118812	MORN4
1270	37.9198	6.83341	1.20262	4.85059	1.23095e-06	2.04253e-05	ENSG00000255650	84983	FAM222A-AS1
1271	134.655	-1.85779	0.177035	-4.84532	1.2641e-06	2.09587e-05	ENSG00000107338	NA	SHB
1272	47.638	2.75204	0.362054	4.83915	1.30394e-06	2.16022e-05	ENSG00000281091	NA
1273	200.764	1.77709	0.160633	4.8377	1.31348e-06	2.17432e-05	ENSG00000233515	101929397	LINC01518
1274	79.4466	2.29295	0.267288	4.83729	1.31623e-06	2.17715e-05	ENSG00000256806	388327	C17orf100
1275	3249.1	-1.49002	0.10131	-4.8368	1.31944e-06	2.17996e-05	ENSG00000182718	302	ANXA2
1276	397.011	1.5974	0.123513	4.83672	1.32e-06	2.17996e-05	ENSG00000174177	348180	CTU2
1277	457.613	-2.18203	0.244444	-4.83558	1.32757e-06	2.19075e-05	ENSG00000166689	144100	PLEKHA7
1278	466.387	-1.49828	0.103113	-4.83237	1.34917e-06	2.223e-05	ENSG00000165801	55701	ARHGEF40
1279	6411.52	-1.40225	0.0832412	-4.83236	1.34923e-06	2.223e-05	ENSG00000167460	7171	TPM4
1280	552.677	-1.51629	0.106871	-4.83099	1.35857e-06	2.23665e-05	ENSG00000143195	387597	ILDR2
1281	429.155	1.60755	0.125872	4.82674	1.38785e-06	2.28307e-05	ENSG00000114383	11334	TUSC2
1282	455.964	-1.547	0.113421	-4.82278	1.41571e-06	2.32707e-05	ENSG00000132613	92154	MTSS2
1283	107.283	-1.97201	0.201602	-4.82143	1.42532e-06	2.34104e-05	ENSG00000165912	29763	PACSIN3
1284	788.503	1.46891	0.0972771	4.82036	1.433e-06	2.35183e-05	ENSG00000165406	220972	MARCHF8
1285	89.4847	-1.97777	0.202899	-4.819	1.44282e-06	2.36609e-05	ENSG00000120162	79817	MOB3B
1286	64.8851	2.44086	0.29912	4.81699	1.4574e-06	2.38627e-05	ENSG00000168026	199223	TTC21A
1287	224.128	1.79744	0.165544	4.81711	1.45652e-06	2.38627e-05	ENSG00000165630	8559	PRPF18
1288	16.1073	6.95425	1.23662	4.81492	1.47256e-06	2.40736e-05	ENSG00000163295	248	ALPI
1289	404.267	1.65676	0.136396	4.81505	1.47165e-06	2.40736e-05	ENSG00000006459	80853	KDM7A
1290	34.9678	-2.44563	0.300272	-4.8144	1.4764e-06	2.41176e-05	ENSG00000171522	NA	PTGER4
1291	36.4271	-2.43225	0.297921	-4.80747	1.52852e-06	2.49496e-05	ENSG00000264717	100996758	NPY4R2
1292	85.5614	-1.94177	0.196031	-4.80419	1.55379e-06	2.53425e-05	ENSG00000115041	NA	KCNIP3
1293	50.9142	-2.29524	0.269725	-4.80209	1.57017e-06	2.55898e-05	ENSG00000198846	9760	TOX
1294	432.3	1.59869	0.124824	4.79626	1.61652e-06	2.62885e-05	ENSG00000154781	51244	CCDC174
1295	450.616	-1.53339	0.111211	-4.79623	1.61679e-06	2.62885e-05	ENSG00000100599	79890	RIN3
1296	253.248	-1.71229	0.14851	-4.79624	1.61673e-06	2.62885e-05	ENSG00000101220	54976	C20orf27
1297	128.474	-2.56418	0.326316	-4.79347	1.63919e-06	2.66321e-05	ENSG00000253368	388610	TRNP1
1298	253.729	-1.64527	0.134681	-4.79113	1.65843e-06	2.69239e-05	ENSG00000170677	9306	SOCS6
1299	42.3421	-2.3228	0.276245	-4.78852	1.68017e-06	2.72558e-05	ENSG00000120149	4488	MSX2
1300	56.1798	2.45392	0.303827	4.78536	1.70677e-06	2.7666e-05	ENSG00000244731	720	C4A
1301	56.1798	2.45392	0.303827	4.78536	1.70677e-06	2.7666e-05	ENSG00000244731	110384692	C4A
1302	121.409	2.05419	0.220538	4.78009	1.75216e-06	2.83799e-05	ENSG00000225828	100128071	FAM229A
1303	151.419	1.83534	0.174803	4.77878	1.76358e-06	2.85428e-05	ENSG00000196696	283970	PDXDC2P-NPIPB14P
1304	1071.3	-1.39909	0.0835323	-4.77765	1.77358e-06	2.86826e-05	ENSG00000113161	3156	HMGCR
1305	327.169	-1.73871	0.15464	-4.77693	1.77988e-06	2.87625e-05	ENSG00000074410	771	CA12
1306	16.3265	6.85322	1.22763	4.76789	1.86167e-06	3.00611e-05	ENSG00000234056	101928922	LINC00463
1307	483.777	-1.59238	0.124251	-4.76765	1.86391e-06	3.00742e-05	ENSG00000157600	84187	TMEM164
1308	94.9933	-1.94435	0.198183	-4.76504	1.8882e-06	3.04427e-05	ENSG00000182463	128553	TSHZ2
1309	218.521	1.72915	0.153283	4.75686	1.96623e-06	3.16764e-05	ENSG00000179304	727866	FAM156B
1310	551.834	1.57667	0.121396	4.75031	2.03104e-06	3.26955e-05	ENSG00000158467	23382	AHCYL2
1311	779.377	-1.45835	0.0965497	-4.74734	2.06111e-06	3.31543e-05	ENSG00000115159	2820	GPD2
1312	1133	1.44305	0.0934031	4.74342	2.10142e-06	3.37769e-05	ENSG00000108587	9527	GOSR1
1313	92.6044	2.14177	0.241444	4.72893	2.25703e-06	3.62503e-05	ENSG00000205744	79958	DENND1C
1314	173.704	1.82858	0.17524	4.72827	2.26438e-06	3.63406e-05	ENSG00000179148	59344	ALOXE3
1315	637.001	-1.57065	0.120723	-4.72694	2.27931e-06	3.65523e-05	ENSG00000196730	1612	DAPK1
1316	211.063	1.76797	0.162521	4.72537	2.29692e-06	3.68068e-05	ENSG00000163393	55356	SLC22A15
1317	2443.38	1.33826	0.0716037	4.72408	2.31162e-06	3.7014e-05	ENSG00000165271	65083	NOL6
1318	1882.82	-1.47442	0.100443	-4.72325	2.32103e-06	3.71082e-05	ENSG00000128641	4430	MYO1B
1319	86.5801	-2.05945	0.224304	-4.72329	2.32061e-06	3.71082e-05	ENSG00000223749	NA	MIR503HG
1320	221.969	1.76671	0.162408	4.72089	2.34816e-06	3.75135e-05	ENSG00000010219	8798	DYRK4
1321	12.6034	-4.09904	0.656579	-4.71998	2.35871e-06	3.76535e-05	ENSG00000146047	255626	H2BC1
1322	177.396	1.89659	0.190014	4.71854	2.37544e-06	3.78631e-05	ENSG00000136696	27177	IL36B
1323	17.2459	-3.18514	0.463082	-4.71869	2.3737e-06	3.78631e-05	ENSG00000182575	11248	NXPH3
1324	163.875	1.8978	0.190333	4.71698	2.39372e-06	3.81255e-05	ENSG00000137821	54839	LRRC49
1325	38.9763	5.94711	1.04913	4.71543	2.41201e-06	3.83878e-05	ENSG00000169116	25849	PARM1
1326	491.895	-1.60467	0.128287	-4.71341	2.43611e-06	3.87421e-05	ENSG00000254332	NA
1327	59.5001	2.4305	0.303556	4.71247	2.44727e-06	3.88902e-05	ENSG00000166816	197257	LDHD
1328	62.4837	2.48832	0.315893	4.71147	2.45932e-06	3.90521e-05	ENSG00000105499	8605	PLA2G4C
1329	70.323	-1.98866	0.209852	-4.71122	2.46242e-06	3.9072e-05	ENSG00000204677	653316	FAM153CP
1330	53.4428	-2.18736	0.252096	-4.70995	2.47782e-06	3.92865e-05	ENSG00000175600	79783	SUGCT
1331	96.8089	-1.83088	0.176573	-4.70561	2.5311e-06	4.01012e-05	ENSG00000120833	8835	SOCS2
1332	40.7548	2.86414	0.396201	4.70503	2.53829e-06	4.01849e-05	ENSG00000234405	NA
1333	181.645	-1.75491	0.160476	-4.70419	2.54875e-06	4.03201e-05	ENSG00000166444	6764	DENND2B
1334	68.0707	-2.06554	0.2266	-4.7023	2.57252e-06	4.06655e-05	ENSG00000230330	NA	HMGN2P3
1335	137.397	1.95862	0.203913	4.70113	2.58729e-06	4.08683e-05	ENSG00000234771	NA	SLC25A25-AS1
1336	90.3543	2.07124	0.228277	4.69272	2.69601e-06	4.25537e-05	ENSG00000279342	NA
1337	168.211	-1.79148	0.168695	-4.6918	2.70809e-06	4.27123e-05	ENSG00000005249	5577	PRKAR2B
1338	1159.64	1.41948	0.0895891	4.68229	2.83686e-06	4.47098e-05	ENSG00000041802	NA	LSG1
1339	397.768	-2.42024	0.303559	-4.67863	2.88798e-06	4.54813e-05	ENSG00000137834	4091	SMAD6
1340	528.73	-1.52668	0.112698	-4.67337	2.96298e-06	4.66276e-05	ENSG00000242125	8420	SNHG3
1341	11.2939	-4.43759	0.735654	-4.67284	2.97063e-06	4.67131e-05	ENSG00000147145	2846	LPAR4
1342	1753.77	-1.43423	0.0929527	-4.6715	2.99012e-06	4.69844e-05	ENSG00000197903	85236	H2BC12
1343	452.05	-1.50071	0.107245	-4.66879	3.0298e-06	4.75724e-05	ENSG00000213853	2013	EMP2
1344	369.055	-1.55305	0.118731	-4.65796	3.19356e-06	5.01062e-05	ENSG00000140406	59274	TLNRD1
1345	168.806	-1.68566	0.147252	-4.65639	3.21806e-06	5.04531e-05	ENSG00000064042	22998	LIMCH1
1346	169.488	1.77859	0.167271	4.65464	3.24544e-06	5.08444e-05	ENSG00000196263	57573	ZNF471
1347	187.064	1.75547	0.162389	4.65223	3.28366e-06	5.14049e-05	ENSG00000183718	84851	TRIM52
1348	881.303	1.45174	0.0971356	4.65057	3.31024e-06	5.17825e-05	ENSG00000163719	64419	MTMR14
1349	192.6	1.88172	0.189608	4.65025	3.31529e-06	5.1823e-05	ENSG00000197619	284370	ZNF615
1350	29.0044	-2.69661	0.364891	-4.64965	3.32506e-06	5.19372e-05	ENSG00000036672	9099	USP2
1351	26.1372	6.62577	1.21079	4.64636	3.37849e-06	5.27325e-05	ENSG00000198488	192134	B3GNT6
1352	102.849	-1.93493	0.201296	-4.64452	3.40864e-06	5.31637e-05	ENSG00000174332	148979	GLIS1
1353	323.972	1.61512	0.13253	4.64136	3.4612e-06	5.39435e-05	ENSG00000164117	NA	FBXO8
1354	213.242	-1.63074	0.135971	-4.63874	3.50538e-06	5.45915e-05	ENSG00000169136	22809	ATF5
1355	50.7233	2.7253	0.371948	4.63856	3.50851e-06	5.45999e-05	ENSG00000057704	57458	TMCC3
1356	46.2074	-2.30976	0.28241	-4.63779	3.5216e-06	5.47631e-05	ENSG00000169933	9758	FRMPD4
1357	3359.62	-1.79719	0.171929	-4.63673	3.53961e-06	5.50025e-05	ENSG00000065534	4638	MYLK
1358	888.195	-1.61487	0.132704	-4.63338	3.59744e-06	5.58599e-05	ENSG00000110427	25758	KIAA1549L
1359	792.827	-1.39501	0.0852874	-4.63152	3.62999e-06	5.63238e-05	ENSG00000175115	55690	PACS1
1360	1419.16	-1.8963	0.193822	-4.62438	3.75725e-06	5.82554e-05	ENSG00000135905	55619	DOCK10
1361	31.3181	3.86417	0.619388	4.62419	3.76057e-06	5.82638e-05	ENSG00000175658	NA	DRD5P2
1362	2973.43	1.36916	0.079837	4.62392	3.76553e-06	5.82978e-05	ENSG00000179195	144348	ZNF664
1363	382.229	-1.47937	0.103682	-4.62351	3.77294e-06	5.83695e-05	ENSG00000128944	90417	KNSTRN
1364	405.072	-1.48268	0.104402	-4.62332	3.77647e-06	5.83813e-05	ENSG00000109929	NA	SC5D
1365	135.517	-2.87604	0.406091	-4.61976	3.84192e-06	5.93494e-05	ENSG00000260604	NA
1366	239.431	-1.62441	0.135202	-4.61832	3.86852e-06	5.97165e-05	ENSG00000144677	10217	CTDSPL
1367	61.7331	-2.01106	0.219004	-4.61664	3.9e-06	6.01584e-05	ENSG00000176720	666	BOK
1368	256.68	-2.35101	0.29275	-4.61489	3.93304e-06	6.06236e-05	ENSG00000150630	7424	VEGFC
1369	29.1698	-2.50594	0.326442	-4.61319	3.96528e-06	6.10758e-05	ENSG00000272512	NA
1370	5.88214	-7.02096	1.30608	-4.60994	4.02793e-06	6.19954e-05	ENSG00000178734	NA	LMO7DN
1371	1992.38	1.39118	0.0848655	4.60943	4.0378e-06	6.21018e-05	ENSG00000125651	2962	GTF2F1
1372	84.2201	2.07032	0.23224	4.60868	4.05229e-06	6.22791e-05	ENSG00000270038	NA
1373	50.9647	-2.1396	0.24762	-4.60223	4.17984e-06	6.41926e-05	ENSG00000138794	839	CASP6
1374	537.578	1.47452	0.103147	4.60042	4.21634e-06	6.46963e-05	ENSG00000115520	80219	COQ10B
1375	35.0146	6.55968	1.20855	4.6003	4.21879e-06	6.46963e-05	ENSG00000188176	342527	SMTNL2
1376	330.732	-1.60952	0.132592	-4.59698	4.28656e-06	6.56878e-05	ENSG00000197461	5154	PDGFA
1377	74.227	-1.95954	0.208755	-4.59649	4.29675e-06	6.57959e-05	ENSG00000001630	1595	CYP51A1
1378	280.506	-1.5503	0.11977	-4.5946	4.33585e-06	6.63463e-05	ENSG00000171877	84978	FRMD5
1379	209.957	-1.5719	0.124483	-4.59417	4.34476e-06	6.63889e-05	ENSG00000174136	285704	RGMB
1380	5867.79	1.34882	0.0759263	4.59416	4.34494e-06	6.63889e-05	ENSG00000182670	7267	TTC3
1381	329.286	-1.55926	0.12174	-4.59386	4.35131e-06	6.64381e-05	ENSG00000185920	5727	PTCH1
1382	322.663	-1.63966	0.139285	-4.5924	4.3817e-06	6.68381e-05	ENSG00000144642	27303	RBMS3
1383	1289.03	-1.49988	0.108851	-4.5923	4.38387e-06	6.68381e-05	ENSG00000087077	NA	TRIP6
1384	252.946	-1.70186	0.15288	-4.59092	4.41294e-06	6.72326e-05	ENSG00000184557	9021	SOCS3
1385	137.811	-1.72436	0.157887	-4.58787	4.47789e-06	6.81728e-05	ENSG00000130956	NA	HABP4
1386	80.8826	2.11068	0.242219	4.58542	4.53079e-06	6.89283e-05	ENSG00000088053	51206	GP6
1387	28.1089	3.82615	0.616608	4.58337	4.57532e-06	6.95554e-05	ENSG00000205129	441054	C4orf47
1388	146.92	-1.81434	0.177869	-4.57829	4.68799e-06	7.12168e-05	ENSG00000177614	NA	PGBD5
1389	184.24	-1.69827	0.152576	-4.57652	4.72777e-06	7.17693e-05	ENSG00000164684	619279	ZNF704
1390	69.2979	-2.06648	0.233073	-4.57572	4.7458e-06	7.1991e-05	ENSG00000282057	NA
1391	31.9378	6.54963	1.21501	4.56754	4.9347e-06	7.48027e-05	ENSG00000188389	5133	PDCD1
1392	772.378	1.44552	0.0976313	4.56334	5.03462e-06	7.62623e-05	ENSG00000184967	79050	NOC4L
1393	1656.39	-2.26688	0.277859	-4.55943	5.12936e-06	7.76415e-05	ENSG00000110092	595	CCND1
1394	1489.73	1.39644	0.0869638	4.55869	5.14747e-06	7.78037e-05	ENSG00000176171	664	BNIP3
1395	263.621	1.62649	0.137427	4.55871	5.14676e-06	7.78037e-05	ENSG00000186020	57711	ZNF529
1396	263.39	1.7127	0.156383	4.55741	5.17879e-06	7.8221e-05	ENSG00000153714	NA	LURAP1L
1397	253.539	-1.57198	0.125577	-4.55479	5.24389e-06	7.91474e-05	ENSG00000143228	83540	NUF2
1398	383.743	-1.5143	0.112925	-4.55435	5.25474e-06	7.92543e-05	ENSG00000133121	90627	STARD13
1399	322.864	1.64313	0.141403	4.54824	5.40964e-06	8.15321e-05	ENSG00000160972	84988	PPP1R16A
1400	359.449	-1.62934	0.138418	-4.54667	5.45004e-06	8.20823e-05	ENSG00000128294	8459	TPST2
1401	789.575	-1.41327	0.0909313	-4.54484	5.49761e-06	8.27395e-05	ENSG00000102172	6611	SMS
1402	326.909	-1.56188	0.123788	-4.53903	5.65127e-06	8.49912e-05	ENSG00000146828	56996	SLC12A9
1403	780.906	-1.38193	0.0841748	-4.53731	5.69765e-06	8.56275e-05	ENSG00000092853	63967	CLSPN
1404	12.2173	6.65841	1.24756	4.53557	5.74471e-06	8.62731e-05	ENSG00000125813	5075	PAX1
1405	131.872	-3.08842	0.460694	-4.5332	5.80961e-06	8.71855e-05	ENSG00000196628	6925	TCF4
1406	84.7126	-1.96423	0.212826	-4.53059	5.88181e-06	8.82062e-05	ENSG00000233588	NA	CYP51A1P2
1407	705.864	-1.47675	0.105299	-4.52757	5.96644e-06	8.94117e-05	ENSG00000140682	7041	TGFB1I1
1408	43.7147	5.73235	1.04542	4.52673	5.99046e-06	8.97076e-05	ENSG00000172602	27289	RND1
1409	31.5259	3.09813	0.463551	4.52621	6.00504e-06	8.9862e-05	ENSG00000183248	NA	PRR36
1410	81.3132	2.13564	0.250957	4.52524	6.03262e-06	9.02106e-05	ENSG00000260428	642658	SCX
1411	120.901	-1.7772	0.171831	-4.52307	6.09477e-06	9.10107e-05	ENSG00000183386	2275	FHL3
1412	195.862	-1.63823	0.141102	-4.52321	6.09086e-06	9.10107e-05	ENSG00000113070	1839	HBEGF
1413	33.2519	3.75101	0.608544	4.52063	6.16548e-06	9.19974e-05	ENSG00000238260	NA
1414	117.757	-1.76873	0.170055	-4.52049	6.1696e-06	9.19974e-05	ENSG00000125414	4620	MYH2
1415	109.564	-1.80937	0.179122	-4.51854	6.22666e-06	9.27825e-05	ENSG00000133466	114904	C1QTNF6
1416	51.7007	2.54622	0.342251	4.5178	6.24858e-06	9.30432e-05	ENSG00000235890	NA	TSPEAR-AS1
1417	1006.93	-1.39761	0.0880298	-4.51679	6.27828e-06	9.34194e-05	ENSG00000137807	9493	KIF23
1418	22.3853	-2.74795	0.387122	-4.51525	6.32417e-06	9.40356e-05	ENSG00000184363	11187	PKP3
1419	451.316	1.46155	0.102247	4.51406	6.35984e-06	9.44993e-05	ENSG00000107731	219699	UNC5B
1420	911.906	-1.50744	0.112553	-4.50845	6.53024e-06	9.69628e-05	ENSG00000182985	23705	CADM1
1421	50.8083	-2.20516	0.267326	-4.5082	6.53793e-06	9.70085e-05	ENSG00000182261	338322	NLRP10
1422	16.5538	6.59444	1.24166	4.50561	6.61826e-06	9.81312e-05	ENSG00000161270	4868	NPHS1
1423	462.134	1.63736	0.141467	4.50533	6.62702e-06	9.81919e-05	ENSG00000141504	112483	SAT2
1424	22.8023	4.2152	0.713746	4.50469	6.64703e-06	9.8419e-05	ENSG00000249574	442497
1425	1674.56	1.42543	0.0944487	4.50436	6.65731e-06	9.8502e-05	ENSG00000109066	54868	TMEM104
1426	140.653	1.89924	0.19965	4.5041	6.66557e-06	9.8555e-05	ENSG00000159733	57732	ZFYVE28
1427	915.63	1.40602	0.0901736	4.50262	6.71224e-06	9.91752e-05	ENSG00000135249	60561	RINT1
1428	1372.71	1.42499	0.094398	4.50211	6.72832e-06	9.9343e-05	ENSG00000060069	9150	CTDP1
1429	753.863	1.41511	0.0924307	4.49105	7.08725e-06	0.000104569	ENSG00000133398	84246	MED10
1430	150.195	-1.67021	0.149419	-4.48545	7.27618e-06	0.000107282	ENSG00000068001	8692	HYAL2
1431	61.8264	-2.02608	0.228815	-4.48434	7.31389e-06	0.000107762	ENSG00000198331	219844	HYLS1
1432	79.6908	-1.98511	0.219701	-4.48388	7.32973e-06	0.00010792	ENSG00000112039	2178	FANCE
1433	3145.36	-1.35216	0.078585	-4.48132	7.41839e-06	0.000109149	ENSG00000002834	3927	LASP1
1434	132.071	-1.73433	0.163899	-4.48041	7.44983e-06	0.000109535	ENSG00000188290	57801	HES4
1435	815.105	1.47557	0.106167	4.4794	7.48532e-06	0.00010998	ENSG00000066422	27107	ZBTB11
1436	161.683	-1.67709	0.151257	-4.47641	7.59093e-06	0.000111454	ENSG00000151702	2313	FLI1
1437	34.8038	-2.38095	0.309073	-4.46803	7.89444e-06	0.000115829	ENSG00000243701	344595	DUBR
1438	287.266	-1.50153	0.112285	-4.46661	7.94703e-06	0.00011652	ENSG00000081913	23239	PHLPP1
1439	430.093	1.63031	0.141186	4.4644	8.02926e-06	0.000117643	ENSG00000011132	9546	APBA3
1440	626.65	1.46075	0.103252	4.46237	8.10585e-06	0.000118683	ENSG00000135709	9764	KIAA0513
1441	151.247	1.7709	0.172807	4.46104	8.15633e-06	0.000119339	ENSG00000224596	NA	ZMIZ1-AS1
1442	23.9073	3.90138	0.650616	4.45944	8.21748e-06	0.00012015	ENSG00000270011	7730	ZNF559-ZNF177
1443	23.9073	3.90138	0.650616	4.45944	8.21748e-06	0.00012015	ENSG00000270011	100529215	ZNF559-ZNF177
1444	28.859	6.38788	1.20837	4.45878	8.24262e-06	0.000120434	ENSG00000238062	348761	SPATA3-AS1
1445	131.505	-1.81482	0.182908	-4.45481	8.39686e-06	0.000122602	ENSG00000198933	9755	TBKBP1
1446	295.771	-1.51156	0.114838	-4.45463	8.40386e-06	0.000122619	ENSG00000121621	81930	KIF18A
1447	2120.54	-1.4101	0.0920728	-4.45411	8.42408e-06	0.000122829	ENSG00000187079	7003	TEAD1
1448	238.648	-1.60975	0.13696	-4.452	8.50743e-06	0.000123959	ENSG00000144645	114884	OSBPL10
1449	2222.57	1.51496	0.115679	4.45161	8.52299e-06	0.000124099	ENSG00000198862	26046	LTN1
1450	296.394	1.56405	0.126782	4.44897	8.62812e-06	0.000125543	ENSG00000196208	9687	GREB1
1451	3422.69	1.38118	0.0856966	4.44803	8.66599e-06	0.000126007	ENSG00000091542	54890	ALKBH5
1452	402.086	1.49843	0.112134	4.44498	8.79012e-06	0.000127724	ENSG00000197496	81031	SLC2A10
1453	21.5872	4.95548	0.88997	4.44451	8.80938e-06	0.000127915	ENSG00000181215	NA	C4orf50
1454	111.333	-1.81683	0.183798	-4.44421	8.82174e-06	0.000128006	ENSG00000162520	81493	SYNC
1455	1295.4	-1.40809	0.091873	-4.44194	8.91495e-06	0.00012927	ENSG00000089159	5829	PXN
1456	555.658	-1.42757	0.0963556	-4.43737	9.10664e-06	0.000131958	ENSG00000140350	8125	ANP32A
1457	600.114	-1.44174	0.0995927	-4.43547	9.18735e-06	0.000133036	ENSG00000125753	7408	VASP
1458	4942.97	1.33792	0.0762073	4.4342	9.24132e-06	0.000133726	ENSG00000184575	11260	XPOT
1459	56.0551	2.36157	0.307264	4.43127	9.36814e-06	0.000135468	ENSG00000245149	101927612	RNF139-DT
1460	160.922	1.73277	0.165472	4.42835	9.49579e-06	0.000137219	ENSG00000241860	NA
1461	462.946	-1.58187	0.131483	-4.42549	9.62251e-06	0.000138955	ENSG00000109501	7466	WFS1
1462	13.6271	-3.4252	0.548387	-4.42243	9.75964e-06	0.000140839	ENSG00000289688	NA
1463	1532.7	1.39191	0.0889306	4.40689	1.04867e-05	0.000151226	ENSG00000105402	8775	NAPA
1464	28.296	3.02755	0.460179	4.406	1.05297e-05	0.000151744	ENSG00000248115	NA
1465	53.4233	-3.25102	0.51099	-4.40521	1.05679e-05	0.00015219	ENSG00000075461	NA	CACNG4
1466	371.222	-1.45792	0.104055	-4.40074	1.07882e-05	0.000155256	ENSG00000228716	1719	DHFR
1467	67.7355	-1.93971	0.213606	-4.3993	1.08602e-05	0.000156186	ENSG00000182310	147650	SPACA6
1468	88.3453	-1.82585	0.188023	-4.39229	1.12164e-05	0.000161198	ENSG00000152217	26040	SETBP1
1469	113.748	1.89218	0.203169	4.39132	1.12663e-05	0.000161804	ENSG00000184047	56616	DIABLO
1470	1298.35	-1.47101	0.107356	-4.38737	1.14729e-05	0.000164659	ENSG00000140443	3480	IGF1R
1471	2545.99	1.36796	0.0840017	4.38041	1.18454e-05	0.000169889	ENSG00000110344	9354	UBE4A
1472	36.0101	-2.29783	0.296371	-4.37909	1.19178e-05	0.000170811	ENSG00000171388	8862	APLN
1473	208.964	-1.57079	0.130363	-4.37847	1.19516e-05	0.000171179	ENSG00000176208	79915	ATAD5
1474	17.596	6.3748	1.2276	4.3783	1.19608e-05	0.000171195	ENSG00000186832	NA	KRT16
1475	41.5265	2.64622	0.376527	4.37211	1.23054e-05	0.000176006	ENSG00000167077	150365	MEI1
1476	2904.95	-1.37257	0.0852207	-4.37177	1.23242e-05	0.000176155	ENSG00000113810	10051	SMC4
1477	96.1818	-1.88474	0.202441	-4.37038	1.24033e-05	0.000177165	ENSG00000182612	83882	TSPAN10
1478	31.9566	6.27963	1.20845	4.36893	1.24856e-05	0.000178221	ENSG00000121807	729230	CCR2
1479	13.1404	-3.39774	0.548873	-4.36848	1.25116e-05	0.000178471	ENSG00000224715	NA
1480	1137.54	-1.35935	0.0822888	-4.36697	1.25981e-05	0.000179582	ENSG00000070814	6949	TCOF1
1481	1573.46	1.32975	0.075532	4.36571	1.26709e-05	0.000180498	ENSG00000136986	79139	DERL1
1482	856.896	1.43087	0.098731	4.36408	1.27661e-05	0.000181732	ENSG00000006194	NA	ZNF263
1483	57.4263	2.48941	0.341366	4.36309	1.28238e-05	0.000182429	ENSG00000212710	64693	CTAGE1
1484	1792.33	1.42831	0.0981845	4.36228	1.28711e-05	0.000182979	ENSG00000115020	200576	PIKFYVE
1485	55.7379	-2.16155	0.266685	-4.3555	1.32762e-05	0.00018861	ENSG00000164251	2150	F2RL1
1486	311.431	-1.50469	0.115917	-4.35386	1.33759e-05	0.000189897	ENSG00000172819	5916	RARG
1487	3638.15	1.37456	0.0861106	4.3498	1.36262e-05	0.00019332	ENSG00000131263	51132	RLIM
1488	263.602	1.62568	0.143853	4.34942	1.36498e-05	0.000193526	ENSG00000156958	2585	GALK2
1489	118.103	-1.72862	0.167533	-4.34911	1.36692e-05	0.00019367	ENSG00000087510	7022	TFAP2C
1490	170.635	-1.58549	0.134711	-4.34625	1.38485e-05	0.000196078	ENSG00000050438	9498	SLC4A8
1491	160.095	-1.67183	0.154603	-4.34552	1.38946e-05	0.000196598	ENSG00000174371	9156	EXO1
1492	368.587	1.58215	0.13397	4.34536	1.39051e-05	0.000196614	ENSG00000205918	NA	PDPK2P
1493	1326.57	1.41968	0.0965859	4.3452	1.39152e-05	0.000196625	ENSG00000159459	NA	UBR1
1494	637.233	-1.47739	0.109889	-4.34427	1.39739e-05	0.000197323	ENSG00000128487	92521	SPECC1
1495	351.346	1.51729	0.119194	4.33989	1.42555e-05	0.000201164	ENSG00000059769	548645	DNAJC25
1496	41.9838	-2.24978	0.287986	-4.33972	1.42665e-05	0.000201184	ENSG00000154556	8470	SORBS2
1497	59.3167	-2.14735	0.264525	-4.33741	1.44173e-05	0.000203175	ENSG00000185361	126282	TNFAIP8L1
1498	107.267	1.94441	0.217789	4.33635	1.44869e-05	0.000204018	ENSG00000196387	7699	ZNF140
1499	38.0606	2.63781	0.378017	4.33263	1.47339e-05	0.000207221	ENSG00000117643	57134	MAN1C1
1500	142.36	-2.659	0.382907	-4.33265	1.47326e-05	0.000207221	ENSG00000152990	NA	ADGRA3
1501	702.468	1.45122	0.104371	4.32324	1.53753e-05	0.000216097	ENSG00000058600	55718	POLR3E
1502	25.6659	-2.62946	0.376933	-4.32295	1.53959e-05	0.000216242	ENSG00000213493	NA	ACTN4P1
1503	95.4702	-1.81407	0.188575	-4.31697	1.58185e-05	0.000222028	ENSG00000115687	23178	PASK
1504	455.085	-1.47464	0.109974	-4.3159	1.58956e-05	0.000222963	ENSG00000165304	9833	MELK
1505	24.8856	-2.63878	0.379912	-4.31357	1.6064e-05	0.000225175	ENSG00000175084	1674	DES
1506	311.385	-1.55301	0.128217	-4.3131	1.6098e-05	0.0002255	ENSG00000184900	6612	SUMO3
1507	23.0033	-2.70003	0.39481	-4.30594	1.66282e-05	0.000232772	ENSG00000122035	387496	RASL11A
1508	180.784	-1.65805	0.152863	-4.3048	1.67138e-05	0.000233816	ENSG00000160446	84885	ZDHHC12
1509	486.608	-1.40557	0.0942454	-4.30338	1.68213e-05	0.000235164	ENSG00000186350	6256	RXRA
1510	22.4723	3.29183	0.532797	4.3015	1.69642e-05	0.000237003	ENSG00000167850	10871	CD300C
1511	599.943	1.42853	0.0996258	4.30135	1.69761e-05	0.000237012	ENSG00000148572	29982	NRBF2
1512	254.872	1.64489	0.150209	4.2933	1.76039e-05	0.000245614	ENSG00000083812	25799	ZNF324
1513	12.6489	6.33746	1.24326	4.29311	1.76185e-05	0.000245655	ENSG00000260220	399693	CCDC187
1514	205.747	1.65895	0.153599	4.29011	1.78587e-05	0.000248839	ENSG00000109083	90410	IFT20
1515	220.537	-1.53523	0.124944	-4.28376	1.83764e-05	0.000255883	ENSG00000147383	50814	NSDHL
1516	1885.02	-1.33178	0.0775318	-4.27931	1.87471e-05	0.000260873	ENSG00000079308	7145	TNS1
1517	71.5566	-2.05499	0.246675	-4.27685	1.89558e-05	0.000263602	ENSG00000129538	6035	RNASE1
1518	71.3663	-1.89247	0.208819	-4.27391	1.92077e-05	0.000266929	ENSG00000156675	80223	RAB11FIP1
1519	70.0031	-2.71563	0.401984	-4.26791	1.97316e-05	0.000274028	ENSG00000166106	170689	ADAMTS15
1520	1005.41	-1.40664	0.0953559	-4.26446	2.00384e-05	0.000278106	ENSG00000091436	51776	MAP3K20
1521	29.4405	2.9206	0.450607	4.26226	2.02373e-05	0.000280681	ENSG00000148408	774	CACNA1B
1522	73.1063	-1.88673	0.208096	-4.26117	2.03359e-05	0.000281863	ENSG00000100344	80339	PNPLA3
1523	54.4643	2.60564	0.377111	4.25774	2.06507e-05	0.000286037	ENSG00000214814	654463	FER1L6
1524	21.7723	-2.61852	0.380612	-4.25243	2.11466e-05	0.000292713	ENSG00000128262	29774	POM121L9P
1525	144.856	-1.71236	0.167646	-4.24916	2.14571e-05	0.000296816	ENSG00000187231	91404	SESTD1
1526	18.7715	-2.9158	0.451032	-4.24759	2.16078e-05	0.000298541	ENSG00000182230	202134	FAM153B
1527	15.0327	6.26393	1.23928	4.24757	2.16102e-05	0.000298541	ENSG00000108405	5023	P2RX1
1528	100.906	-1.79799	0.187935	-4.24608	2.17542e-05	0.000300334	ENSG00000174804	8322	FZD4
1529	349.471	1.63532	0.149648	4.24543	2.18176e-05	0.000301012	ENSG00000131019	NA	ULBP3
1530	137.585	-1.75166	0.177262	-4.24038	2.23137e-05	0.000307655	ENSG00000143147	23432	GPR161
1531	33.2761	-2.30674	0.308375	-4.23749	2.26032e-05	0.000311442	ENSG00000119699	7043	TGFB3
1532	2095.42	1.35177	0.0830202	4.23715	2.26376e-05	0.000311712	ENSG00000163520	2199	FBLN2
1533	191.868	1.68214	0.161088	4.23459	2.2897e-05	0.000315077	ENSG00000282508	NA	LINC01002
1534	74.2504	2.09145	0.257843	4.23298	2.30613e-05	0.000317131	ENSG00000102445	80183	RUBCNL
1535	28.1173	3.1022	0.496792	4.23155	2.32085e-05	0.000318946	ENSG00000277745	83740	H2AB3
1536	19.4646	6.14991	1.21742	4.2302	2.33481e-05	0.000320655	ENSG00000151490	5800	PTPRO
1537	50.4195	-2.10123	0.260609	-4.22561	2.38291e-05	0.000327047	ENSG00000196456	NA	ZNF775
1538	613.347	1.55449	0.131245	4.22483	2.3912e-05	0.000327972	ENSG00000105321	26093	CCDC9
1539	209.348	-1.68573	0.162323	-4.22447	2.39507e-05	0.000328289	ENSG00000006062	9020	MAP3K14
1540	60.9187	-2.0393	0.246379	-4.2183	2.46147e-05	0.00033717	ENSG00000100311	5155	PDGFB
1541	1580.35	1.33006	0.0782697	4.21697	2.47611e-05	0.000338955	ENSG00000145817	81555	YIPF5
1542	345.416	-1.62977	0.149357	-4.21656	2.48058e-05	0.000339346	ENSG00000146263	253714	MMS22L
1543	399.316	-2.20613	0.286481	-4.21017	2.55175e-05	0.000348855	ENSG00000019549	6591	SNAI2
1544	10711.3	-1.325	0.0772505	-4.20704	2.58741e-05	0.0003535	ENSG00000167601	558	AXL
1545	172.719	-1.58981	0.140211	-4.20661	2.59228e-05	0.000353936	ENSG00000222038	653781	POTEJ
1546	378.735	1.53896	0.128169	4.20505	2.61019e-05	0.000356151	ENSG00000076650	55094	GPATCH1
1547	558.43	1.43822	0.104252	4.20349	2.62831e-05	0.00035839	ENSG00000197608	284371	ZNF841
1548	4102.54	1.2756	0.0655709	4.20308	2.63307e-05	0.000358807	ENSG00000150961	9871	SEC24D
1549	207.479	-1.56255	0.133867	-4.20232	2.6419e-05	0.000359777	ENSG00000101825	NA	MXRA5
1550	156.054	-1.8321	0.198141	-4.19955	2.67447e-05	0.000363977	ENSG00000177679	222183	SRRM3
1551	66.2363	2.14274	0.272175	4.19853	2.68651e-05	0.000365379	ENSG00000280208	NA	GGT4P
1552	75.3504	-1.90425	0.215472	-4.19662	2.70933e-05	0.000368154	ENSG00000128872	29767	TMOD2
1553	1763.82	-1.41609	0.0991503	-4.19653	2.71041e-05	0.000368154	ENSG00000160014	808	CALM3
1554	128.224	-1.72755	0.17338	-4.19627	2.71341e-05	0.000368323	ENSG00000181143	94025	MUC16
1555	327.01	-1.48349	0.115296	-4.19344	2.74757e-05	0.00037272	ENSG00000184897	NA	H1-10
1556	16.8966	-3.00188	0.477413	-4.19318	2.75077e-05	0.000372913	ENSG00000231131	101928687	LNCAROD
1557	579.626	1.48343	0.115563	4.18329	2.87314e-05	0.000389253	ENSG00000180488	374986	MIGA1
1558	11.2997	-3.53586	0.606231	-4.18299	2.87699e-05	0.000389524	ENSG00000182168	8633	UNC5C
1559	160.982	-1.6021	0.144314	-4.17212	3.01781e-05	0.000408326	ENSG00000133020	NA	MYH8
1560	28.3275	-2.40609	0.337245	-4.16932	3.05506e-05	0.000413101	ENSG00000172059	8462	KLF11
1561	5246.14	-1.33047	0.0793062	-4.16698	3.08665e-05	0.000417104	ENSG00000168298	3008	H1-4
1562	4624.32	-1.39802	0.0955586	-4.16519	3.11087e-05	0.000420107	ENSG00000157654	445815	PALM2AKAP2
1563	30.387	3.00434	0.481326	4.16421	3.12436e-05	0.000421658	ENSG00000167984	197358	NLRC3
1564	1476.73	1.36113	0.0867854	4.16115	3.16646e-05	0.000427067	ENSG00000102226	8237	USP11
1565	159.761	1.7047	0.169386	4.16035	3.17763e-05	0.000428298	ENSG00000125089	54436	SH3TC1
1566	314.355	-1.64617	0.155518	-4.15495	3.25357e-05	0.000438253	ENSG00000090975	57605	PITPNM2
1567	229.409	1.63659	0.153415	4.14943	3.33299e-05	0.000448663	ENSG00000181035	284439	SLC25A42
1568	182.25	-1.58223	0.140326	-4.14909	3.33795e-05	0.000449044	ENSG00000134222	84722	PSRC1
1569	42.0277	-2.1239	0.271092	-4.14583	3.38584e-05	0.000455196	ENSG00000196337	94027	CGB7
1570	26.0837	4.27738	0.791051	4.14307	3.4269e-05	0.000460128	ENSG00000251003	NA	ZFPM2-AS1
1571	162.611	1.77126	0.186152	4.14316	3.42548e-05	0.000460128	ENSG00000196611	4312	MMP1
1572	104.661	-2.51788	0.366403	-4.14265	3.43312e-05	0.000460668	ENSG00000204767	100131897	INSYN2B
1573	162.085	1.72727	0.175645	4.14059	3.46408e-05	0.000464527	ENSG00000198046	63934	ZNF667
1574	629.756	-1.44493	0.107486	-4.13942	3.48185e-05	0.000466612	ENSG00000115884	6382	SDC1
1575	246.826	-1.61032	0.14753	-4.13697	3.51928e-05	0.000471328	ENSG00000171488	84230	LRRC8C
1576	3281.63	-1.41154	0.0995208	-4.13525	3.54567e-05	0.00047456	ENSG00000133816	9645	MICAL2
1577	29.3139	-3.78151	0.672744	-4.13458	3.55603e-05	0.000475644	ENSG00000279717	NA
1578	34.2445	-2.51354	0.366163	-4.13351	3.57261e-05	0.000477558	ENSG00000236060	NA	HSPB1P1
1579	501.527	1.53495	0.129646	4.12626	3.68709e-05	0.000491924	ENSG00000164114	79884	MAP9
1580	13.0427	6.18532	1.25665	4.1263	3.68654e-05	0.000491924	ENSG00000134533	85004	RERG
1581	200.261	1.67131	0.162683	4.12649	3.68339e-05	0.000491924	ENSG00000213903	1241	LTB4R
1582	120.342	1.88774	0.215293	4.12339	3.73334e-05	0.000497779	ENSG00000112651	51069	MRPL2
1583	23.0081	4.23069	0.783918	4.12121	3.76887e-05	0.000502198	ENSG00000162510	4146	MATN1
1584	17.8945	3.77711	0.674059	4.11998	3.78905e-05	0.000504568	ENSG00000167895	147138	TMC8
1585	22.5067	3.07224	0.503128	4.11872	3.80978e-05	0.000507007	ENSG00000263345	NA
1586	323.059	-1.52868	0.128407	-4.11725	3.8342e-05	0.000509934	ENSG00000095015	4214	MAP3K1
1587	2373.3	-1.40092	0.0973852	-4.11683	3.84117e-05	0.000510539	ENSG00000153317	50807	ASAP1
1588	90.9761	-1.75786	0.184183	-4.11472	3.87643e-05	0.0005149	ENSG00000157870	127281	PRXL2B
1589	68.237	2.10901	0.269651	4.11277	3.90946e-05	0.000518959	ENSG00000260034	100506655	LCMT1-AS2
1590	1045.55	1.36898	0.0897926	4.10923	3.96986e-05	0.000526553	ENSG00000144867	58477	SRPRB
1591	446.953	-1.56953	0.138602	-4.10912	3.97167e-05	0.000526553	ENSG00000157657	114991	ZNF618
1592	2765.17	1.29729	0.0723557	4.10879	3.97741e-05	0.000526981	ENSG00000179889	23042	PDXDC1
1593	24.7429	3.04742	0.49837	4.10824	3.98679e-05	0.000527892	ENSG00000204052	221424	LRRC73
1594	686.035	-1.49053	0.119416	-4.10777	3.99493e-05	0.000528637	ENSG00000148180	2934	GSN
1595	23.1481	-2.54764	0.376978	-4.10538	4.03648e-05	0.0005338	ENSG00000141433	116	ADCYAP1
1596	146.996	-1.60285	0.146936	-4.10282	4.08136e-05	0.000539396	ENSG00000143061	3321	IGSF3
1597	190.328	-1.58063	0.141602	-4.10044	4.12369e-05	0.000544395	ENSG00000112139	266727	MDGA1
1598	50.8666	-3.93406	0.715554	-4.1004	4.12436e-05	0.000544395	ENSG00000105880	1749	DLX5
1599	80.389	-1.87482	0.213378	-4.09987	4.13384e-05	0.000545304	ENSG00000129521	112399	EGLN3
1600	383.033	-3.40914	0.587663	-4.09953	4.13983e-05	0.000545752	ENSG00000168874	84913	ATOH8
1601	18.1113	6.05309	1.23337	4.09699	4.18564e-05	0.000551445	ENSG00000105707	3249	HPN
1602	1067.31	1.38757	0.0946079	4.09655	4.19353e-05	0.000551794	ENSG00000160445	10444	ZER1
1603	421.955	-1.39892	0.0973785	-4.09656	4.19331e-05	0.000551794	ENSG00000067955	865	CBFB
1604	535.094	1.47551	0.11611	4.09536	4.21504e-05	0.000554278	ENSG00000119688	5826	ABCD4
1605	28.0941	2.95491	0.477412	4.0948	4.22533e-05	0.000555283	ENSG00000196218	6261	RYR1
1606	112.036	-1.75153	0.183541	-4.0946	4.229e-05	0.000555419	ENSG00000196814	89853	MVB12B
1607	130.558	-1.71769	0.175304	-4.09401	4.23973e-05	0.000556482	ENSG00000213186	286827	TRIM59
1608	350.516	1.49636	0.121323	4.09122	4.29102e-05	0.000562862	ENSG00000165533	123016	TTC8
1609	422.539	-1.96399	0.235653	-4.09073	4.30014e-05	0.000563707	ENSG00000277443	4082	MARCKS
1610	1185.83	1.31386	0.0767316	4.09041	4.30615e-05	0.000563871	ENSG00000172432	54676	GTPBP2
1611	69.3704	-1.93867	0.229482	-4.09038	4.30675e-05	0.000563871	ENSG00000277586	4747	NEFL
1612	897.278	1.39572	0.0968944	4.08402	4.42628e-05	0.00057916	ENSG00000143479	8444	DYRK3
1613	3494.2	-1.39575	0.0969346	-4.08268	4.45194e-05	0.000582066	ENSG00000162909	824	CAPN2
1614	1596.27	1.39127	0.0958398	4.08257	4.45402e-05	0.000582066	ENSG00000120889	8795	TNFRSF10B
1615	1520.59	1.30911	0.0757201	4.08225	4.46022e-05	0.000582456	ENSG00000013374	51667	NUB1
1616	185.998	1.71072	0.174104	4.08213	4.46254e-05	0.000582456	ENSG00000140471	55180	LINS1
1617	94.4694	-1.80208	0.196522	-4.0814	4.47654e-05	0.000583921	ENSG00000177602	83903	HASPIN
1618	34.2737	2.87614	0.459968	4.07885	4.52592e-05	0.000589996	ENSG00000240303	84129	ACAD11
1619	40.3331	2.5073	0.369629	4.07787	4.54506e-05	0.000592124	ENSG00000113555	51294	PCDH12
1620	574.519	-1.48337	0.118711	-4.07185	4.66416e-05	0.000607264	ENSG00000105722	2077	ERF
1621	49.2611	-2.06992	0.262867	-4.0702	4.6973e-05	0.000611201	ENSG00000033122	57554	LRRC7
1622	22.6031	3.12826	0.523382	4.06637	4.77521e-05	0.000620955	ENSG00000260653	NA
1623	171.46	-2.33743	0.329235	-4.06223	4.86056e-05	0.000631663	ENSG00000188064	7477	WNT7B
1624	167.5	-1.64548	0.159028	-4.05891	4.93015e-05	0.000640311	ENSG00000145990	54438	GFOD1
1625	23.7083	3.44651	0.602895	4.05794	4.95076e-05	0.00064259	ENSG00000124772	57699	CPNE5
1626	57.4582	-2.03262	0.254799	-4.05269	5.06321e-05	0.000656781	ENSG00000183072	1482	NKX2-5
1627	33.2837	-2.30358	0.321675	-4.05248	5.06784e-05	0.000656977	ENSG00000238243	343171	OR2W3
1628	481.175	1.47353	0.116921	4.05001	5.12165e-05	0.000663544	ENSG00000185404	93349	SP140L
1629	49.1896	-2.08469	0.267953	-4.04806	5.16436e-05	0.000668665	ENSG00000159753	146206	CARMIL2
1630	248.352	1.67359	0.16656	4.04411	5.25221e-05	0.000679622	ENSG00000172273	25988	HINFP
1631	983.88	1.42976	0.106297	4.04303	5.27655e-05	0.000682351	ENSG00000131871	55829	SELENOS
1632	377.848	-1.49776	0.123127	-4.04267	5.2845e-05	0.00068254	ENSG00000170442	3892	KRT86
1633	130.649	-1.62344	0.15421	-4.0428	5.28163e-05	0.00068254	ENSG00000176974	6470	SHMT1
1634	166.636	1.73782	0.182645	4.03965	5.35304e-05	0.000690968	ENSG00000169239	11238	CA5B
1635	38.5247	2.5389	0.381039	4.0387	5.3748e-05	0.000693353	ENSG00000177640	255082	CASC2
1636	514.212	-1.46673	0.115628	-4.03647	5.42615e-05	0.000699547	ENSG00000141429	2589	GALNT1
1637	9.6008	6.08966	1.26115	4.03571	5.44367e-05	0.000701376	ENSG00000167037	129049	SGSM1
1638	195.492	-1.56067	0.13897	-4.03445	5.47296e-05	0.000704582	ENSG00000114126	7029	TFDP2
1639	448.916	-1.50114	0.124218	-4.03436	5.47524e-05	0.000704582	ENSG00000149218	NA	ENDOD1
1640	3238.85	-1.32505	0.0805855	-4.03361	5.49258e-05	0.000706369	ENSG00000024422	30846	EHD2
1641	143.028	-1.80108	0.198609	-4.03347	5.49585e-05	0.000706369	ENSG00000074181	4854	NOTCH3
1642	51.098	-2.02954	0.255337	-4.03208	5.52843e-05	0.000710123	ENSG00000253676	NA	TAGLN2P1
1643	294.485	1.5704	0.141612	4.0279	5.62775e-05	0.000722439	ENSG00000085274	55892	MYNN
1644	209.125	1.62529	0.155334	4.02542	5.68737e-05	0.000729647	ENSG00000261512	NA
1645	350.689	1.51124	0.12704	4.0242	5.71698e-05	0.000733	ENSG00000100116	NA	GCAT
1646	132.247	1.75477	0.187599	4.0233	5.7388e-05	0.000735349	ENSG00000197857	51710	ZNF44
1647	62.1141	-1.93449	0.232306	-4.02264	5.75487e-05	0.000736959	ENSG00000213707	NA	HMGB1P10
1648	847.2	1.42604	0.105957	4.02082	5.7996e-05	0.000742237	ENSG00000011021	1185	CLCN6
1649	742.378	1.50634	0.125991	4.01886	5.84809e-05	0.000747986	ENSG00000128563	NA	PRKRIP1
1650	327.034	-1.48077	0.119683	-4.01708	5.89249e-05	0.000753208	ENSG00000173757	6777	STAT5B
1651	31.0868	-2.36233	0.339295	-4.01517	5.94032e-05	0.00075886	ENSG00000104818	114336	CGB2
1652	158.844	1.67563	0.168309	4.01421	5.96458e-05	0.000761497	ENSG00000214106	NA	PAXIP1-AS2
1653	40.9123	2.60781	0.400748	4.01202	6.02026e-05	0.00076814	ENSG00000158486	55567	DNAH3
1654	82.8016	-1.84909	0.211694	-4.01095	6.04741e-05	0.000771137	ENSG00000135736	92922	CCDC102A
1655	76.6312	-1.88233	0.220114	-4.00853	6.10974e-05	0.000778613	ENSG00000204091	732253	TDRG1
1656	1923.15	1.37275	0.0929926	4.00839	6.11351e-05	0.000778621	ENSG00000134987	134430	WDR36
1657	46.3164	-2.03525	0.258362	-4.00696	6.15043e-05	0.00078285	ENSG00000079335	8556	CDC14A
1658	369.893	-1.55901	0.139517	-4.00679	6.15506e-05	0.000782965	ENSG00000231290	149773	APCDD1L-DT
1659	25.1216	4.53432	0.882216	4.00619	6.17071e-05	0.000784481	ENSG00000130768	27293	SMPDL3B
1660	128.629	-1.68287	0.170635	-4.00195	6.28221e-05	0.000798175	ENSG00000141560	79672	FN3KRP
1661	2088.24	-1.30638	0.0765899	-4.00023	6.32813e-05	0.000803524	ENSG00000111676	1822	ATN1
1662	336.956	-1.47252	0.118131	-3.99995	6.33552e-05	0.000803976	ENSG00000064961	10362	HMG20B
1663	248.85	-1.98686	0.246732	-3.99973	6.34136e-05	0.000804232	ENSG00000067798	89795	NAV3
1664	39.2184	-2.08737	0.271998	-3.9977	6.39598e-05	0.000810671	ENSG00000258947	10381	TUBB3
1665	625.733	-1.3819	0.0955465	-3.99702	6.41445e-05	0.000812523	ENSG00000196141	26010	SPATS2L
1666	1020.05	-1.45306	0.113373	-3.99616	6.43774e-05	0.000814982	ENSG00000129474	84962	AJUBA
1667	1329.57	-1.29525	0.0739061	-3.99498	6.46994e-05	0.000818566	ENSG00000146918	54892	NCAPG2
1668	795.774	1.40973	0.102575	3.99444	6.48487e-05	0.000819553	ENSG00000132718	23208	SYT11
1669	806.486	-1.38223	0.0956905	-3.99441	6.48553e-05	0.000819553	ENSG00000144711	9922	IQSEC1
1670	691.236	1.41212	0.103191	3.99377	6.50319e-05	0.000821291	ENSG00000185163	317781	DDX51
1671	954.703	1.46775	0.117139	3.99311	6.52116e-05	0.000823067	ENSG00000204186	57683	ZDBF2
1672	27.2534	-2.45092	0.363425	-3.99235	6.54204e-05	0.000825207	ENSG00000276107	NA	THBS1-IT1
1673	139.626	-1.6526	0.163482	-3.99188	6.5552e-05	0.000826372	ENSG00000139291	55266	TMEM19
1674	218.792	1.65819	0.164973	3.98966	6.61689e-05	0.000833649	ENSG00000204514	730051	ZNF814
1675	174.713	-1.55158	0.138275	-3.98899	6.63562e-05	0.000835509	ENSG00000139998	376267	RAB15
1676	41.609	-2.07587	0.26979	-3.98781	6.66863e-05	0.000839162	ENSG00000152782	53354	PANK1
1677	459.879	-1.52542	0.131772	-3.98734	6.68171e-05	0.000840306	ENSG00000166446	124359	CDYL2
1678	6240.03	1.26668	0.0669855	3.98115	6.85834e-05	0.000862003	ENSG00000171867	5621	PRNP
1679	55.8922	-1.97854	0.245837	-3.98043	6.87903e-05	0.000864088	ENSG00000241095	NA	CYP51A1P1
1680	529.71	1.4152	0.104429	3.97586	7.01249e-05	0.000880327	ENSG00000132286	26515	TIMM10B
1681	110.405	-1.66761	0.168232	-3.9684	7.23569e-05	0.000907805	ENSG00000188985	NA	DHFRP1
1682	307.221	1.57608	0.145428	3.96126	7.45544e-05	0.000934818	ENSG00000177943	158056	MAMDC4
1683	998.619	-1.44948	0.113498	-3.96027	7.48659e-05	0.000938164	ENSG00000147100	NA	SLC16A2
1684	900.301	1.40596	0.102521	3.95974	7.50299e-05	0.00093966	ENSG00000037749	4238	MFAP3
1685	189.843	1.61851	0.156317	3.95677	7.59694e-05	0.000950402	ENSG00000160439	112724	RDH13
1686	141.382	-1.74288	0.187749	-3.95675	7.59779e-05	0.000950402	ENSG00000100162	79019	CENPM
1687	50.5335	2.22458	0.309567	3.95578	7.62868e-05	0.000953699	ENSG00000279568	NA
1688	483.89	1.46451	0.117484	3.9538	7.69206e-05	0.00096105	ENSG00000088179	NA	PTPN4
1689	9.06394	6.05196	1.27813	3.95263	7.72976e-05	0.000965188	ENSG00000135144	1840	DTX1
1690	125.716	1.85598	0.216804	3.94818	7.87472e-05	0.000982706	ENSG00000273151	NA
1691	258.034	-1.51537	0.130554	-3.94755	7.89549e-05	0.000984713	ENSG00000040199	23035	PHLPP2
1692	36.3244	-2.17492	0.297753	-3.94597	7.94766e-05	0.000990632	ENSG00000162496	9249	DHRS3
1693	148.82	-1.57583	0.146007	-3.94385	8.01852e-05	0.000998282	ENSG00000170085	375484	SIMC1
1694	81.5704	-1.85779	0.217498	-3.94389	8.01696e-05	0.000998282	ENSG00000232774	NA
1695	253.329	-1.54116	0.13725	-3.94288	8.05089e-05	0.00100172	ENSG00000137502	27314	RAB30
1696	140.671	-1.63491	0.161035	-3.94266	8.05814e-05	0.00100203	ENSG00000142698	84970	C1orf94
1697	99.8857	-1.72995	0.185157	-3.94236	8.06825e-05	0.00100269	ENSG00000158163	199221	DZIP1L
1698	85.0978	-1.78611	0.199592	-3.93856	8.19733e-05	0.00101813	ENSG00000047617	57101	ANO2
1699	44.672	2.23196	0.312839	3.93801	8.21604e-05	0.00101986	ENSG00000286379	NA
1700	249.619	-1.5256	0.133505	-3.93691	8.25386e-05	0.00102395	ENSG00000183114	NA	FAM43B
1701	69.2244	-1.85359	0.216864	-3.93606	8.28297e-05	0.00102695	ENSG00000198056	5557	PRIM1
1702	11.8148	5.96031	1.26064	3.93477	8.32761e-05	0.00103153	ENSG00000185176	653437	AQP12B
1703	21.2592	3.44961	0.622564	3.93471	8.32971e-05	0.00103153	ENSG00000118160	6543	SLC8A2
1704	193.077	1.64991	0.165221	3.9336	8.36817e-05	0.00103568	ENSG00000115423	1768	DNAH6
1705	19.6702	4.14105	0.798547	3.93346	8.37324e-05	0.0010357	ENSG00000289704	NA
1706	51.649	2.36352	0.347161	3.92762	8.57899e-05	0.00106053	ENSG00000116990	4610	MYCL
1707	8.49131	6.0265	1.28077	3.92458	8.68815e-05	0.00107339	ENSG00000181085	225689	MAPK15
1708	112.193	-1.65905	0.168241	-3.91731	8.95416e-05	0.00110561	ENSG00000160190	54020	SLC37A1
1709	16.5212	-2.87208	0.478083	-3.91579	9.01072e-05	0.00111194	ENSG00000106689	9355	LHX2
1710	544.183	1.50156	0.128309	3.90903	9.26661e-05	0.00114285	ENSG00000135297	25821	MTO1
1711	33.6771	2.5608	0.399459	3.90727	9.33449e-05	0.00115054	ENSG00000280399	NA
1712	122.549	-1.70915	0.181536	-3.90642	9.36729e-05	0.00115391	ENSG00000197299	641	BLM
1713	543.722	1.43217	0.110656	3.90553	9.40175e-05	0.00115748	ENSG00000165355	254170	FBXO33
1714	52.0535	-1.96075	0.246046	-3.90476	9.43194e-05	0.00116051	ENSG00000289586	NA
1715	10.2384	5.92076	1.26039	3.90416	9.45548e-05	0.00116273	ENSG00000110244	337	APOA4
1716	33.3415	2.53721	0.393884	3.90269	9.51282e-05	0.0011691	ENSG00000172209	2845	GPR22
1717	917.171	-1.98258	0.252045	-3.89842	9.68224e-05	0.00118923	ENSG00000166949	4088	SMAD3
1718	406.749	-1.49974	0.128197	-3.89825	9.68915e-05	0.00118938	ENSG00000106034	79974	CPED1
1719	92.9783	1.88703	0.227639	3.89666	9.75273e-05	0.00119649	ENSG00000226432	NA
1720	1078.92	-1.7181	0.184536	-3.8914	9.96694e-05	0.00122134	ENSG00000177565	79718	TBL1XR1
1721	19.3649	-2.63803	0.420922	-3.89153	9.96145e-05	0.00122134	ENSG00000197275	25788	RAD54B
1722	8.49944	6.01898	1.28983	3.89121	9.97462e-05	0.00122157	ENSG00000235631	378925	RNF148
1723	1411.61	-1.41593	0.107008	-3.88687	0.000101544	0.00124286	ENSG00000183853	55243	KIRREL1
1724	392.357	1.49727	0.128051	3.8834	0.000103008	0.00126005	ENSG00000260404	NA
1725	15.7831	5.78506	1.23244	3.88258	0.000103354	0.00126355	ENSG00000233115	NA	FAM90A11P
1726	2004.29	1.31036	0.0799421	3.88235	0.00010345	0.00126399	ENSG00000106344	55131	RBM28
1727	18.577	-2.6298	0.419831	-3.88204	0.000103584	0.00126489	ENSG00000230615	NA
1728	243.341	1.56215	0.144979	3.87746	0.000105554	0.0012882	ENSG00000112367	9896	FIG4
1729	172.08	-1.59096	0.15245	-3.87642	0.000106003	0.00129293	ENSG00000171320	157570	ESCO2
1730	31.843	-2.24602	0.321601	-3.87443	0.000106873	0.00130278	ENSG00000231764	NA	DLX6-AS1
1731	914.534	1.4598	0.118744	3.87221	0.000107854	0.00131389	ENSG00000048392	50484	RRM2B
1732	177.518	-1.5645	0.145788	-3.87208	0.000107909	0.00131389	ENSG00000176834	54621	VSIG10
1733	1425.64	-1.40342	0.10422	-3.87086	0.000108454	0.00131976	ENSG00000173706	NA	HEG1
1734	168.517	-1.54272	0.140397	-3.86559	0.00011082	0.00134778	ENSG00000088280	55616	ASAP3
1735	192.226	-1.50202	0.129876	-3.86538	0.000110915	0.00134815	ENSG00000134574	1643	DDB2
1736	33.0361	-2.30975	0.338876	-3.86499	0.000111094	0.00134955	ENSG00000262655	10418	SPON1
1737	47.3483	2.18072	0.305758	3.86163	0.000112632	0.00136744	ENSG00000167614	57348	TTYH1
1738	3622.42	-1.26822	0.0694902	-3.85985	0.000113458	0.00137667	ENSG00000069275	64710	NUCKS1
1739	10.6387	5.83353	1.25256	3.85891	0.000113892	0.00138114	ENSG00000260542	NA
1740	863.479	1.3538	0.0917871	3.85455	0.000115942	0.00140438	ENSG00000119048	7320	UBE2B
1741	8.29521	-3.76002	0.716041	-3.85456	0.000115938	0.00140438	ENSG00000237862	NA
1742	23.0119	-2.42999	0.3711	-3.85339	0.000116493	0.00141025	ENSG00000128266	NA	GNAZ
1743	78.121	2.00373	0.26078	3.84896	0.00011862	0.00143448	ENSG00000100564	5283	PIGH
1744	1087.13	-1.34838	0.0905139	-3.84894	0.000118631	0.00143448	ENSG00000074696	51495	HACD3
1745	32.4325	2.72343	0.447893	3.84786	0.000119153	0.00143996	ENSG00000283108	NA
1746	1853.63	-1.74318	0.193213	-3.84644	0.000119845	0.00144749	ENSG00000131016	9590	AKAP12
1747	18.3421	4.43461	0.893595	3.84358	0.000121252	0.00146365	ENSG00000175868	797	CALCB
1748	26.3443	-2.30707	0.340128	-3.84288	0.0001216	0.00146701	ENSG00000101307	10326	SIRPB1
1749	744.337	1.43398	0.112943	3.84247	0.000121804	0.00146863	ENSG00000068903	22933	SIRT2
1750	17.9604	4.05673	0.796058	3.83983	0.000123118	0.00148362	ENSG00000260643	NA
1751	105.613	-1.70938	0.184774	-3.83917	0.000123448	0.00148675	ENSG00000035499	55789	DEPDC1B
1752	87.4982	-1.79613	0.207592	-3.83506	0.000125533	0.001511	ENSG00000167535	784	CACNB3
1753	757.912	-1.4052	0.105683	-3.83411	0.000126018	0.00151596	ENSG00000206053	NA	JPT2
1754	1203.37	1.34834	0.0909082	3.8318	0.000127208	0.00152941	ENSG00000105223	23646	PLD3
1755	1045.27	1.3193	0.0833545	3.83063	0.000127817	0.00153585	ENSG00000212719	NA	LINC02693
1756	1616.14	-1.7341	0.191671	-3.83002	0.000128135	0.00153879	ENSG00000114270	1294	COL7A1
1757	38.5107	-2.12387	0.293719	-3.82636	0.000130053	0.00156093	ENSG00000177508	79191	IRX3
1758	8.11924	5.88275	1.27749	3.82215	0.000132291	0.00158689	ENSG00000286920	113523636	SMIM40
1759	7.38484	-4.36598	0.880998	-3.82064	0.000133107	0.00159577	ENSG00000267000	NA
1760	15.7386	4.45852	0.905287	3.82036	0.00013326	0.00159669	ENSG00000075043	3785	KCNQ2
1761	173.657	-1.59729	0.156527	-3.81591	0.000135685	0.00162482	ENSG00000117650	4751	NEK2
1762	316.468	-1.4511	0.118247	-3.8149	0.00013624	0.00163054	ENSG00000144681	6769	STAC
1763	746.855	-1.43435	0.113916	-3.81292	0.000137337	0.00164273	ENSG00000157483	4643	MYO1E
1764	75.3302	-2.00633	0.264007	-3.81176	0.00013798	0.00164949	ENSG00000162929	84542	SANBR
1765	4420.48	-1.73422	0.19282	-3.80782	0.000140199	0.00167506	ENSG00000128567	5420	PODXL
1766	56.0034	-1.87238	0.229265	-3.80512	0.000141738	0.00169249	ENSG00000161682	284069	FAM171A2
1767	17.4265	3.76727	0.727371	3.80448	0.000142103	0.00169589	ENSG00000182557	201305	SPNS3
1768	69.899	2.08825	0.286059	3.80428	0.000142216	0.00169627	ENSG00000140465	1543	CYP1A1
1769	8.40412	5.87689	1.2825	3.80265	0.000143154	0.00170553	ENSG00000285607	NA	FAM90A9P
1770	145.234	1.70557	0.185546	3.80268	0.000143142	0.00170553	ENSG00000249471	388569	ZNF324B
1771	87.4689	1.90874	0.239086	3.80087	0.000144187	0.00171686	ENSG00000159882	7773	ZNF230
1772	18.6637	-2.71179	0.450462	-3.80008	0.000144652	0.00172143	ENSG00000169126	55130	ODAD2
1773	22.0548	4.37068	0.887144	3.79947	0.000145004	0.00172464	ENSG00000287031	NA
1774	69.0651	-1.80037	0.210873	-3.79551	0.000147341	0.00175144	ENSG00000173926	115123	MARCHF3
1775	2217.12	-2.14503	0.301867	-3.79315	0.000148748	0.00176717	ENSG00000187498	1282	COL4A1
1776	498.829	-1.39941	0.105304	-3.79289	0.000148904	0.00176802	ENSG00000130164	3949	LDLR
1777	1616.35	-1.37643	0.0992619	-3.79232	0.000149244	0.00177106	ENSG00000067082	1316	KLF6
1778	227.161	-1.6606	0.174327	-3.78941	0.000151008	0.00178998	ENSG00000183723	146223	CMTM4
1779	66.0642	-1.99703	0.263108	-3.78944	0.000150988	0.00178998	ENSG00000273706	3975	LHX1
1780	310.412	-1.46031	0.121549	-3.78705	0.000152449	0.00180605	ENSG00000162458	54751	FBLIM1
1781	25.6196	-2.40071	0.370945	-3.77605	0.000159333	0.00188653	ENSG00000229563	101927528	LINC01204
1782	23.1491	-2.33713	0.354296	-3.77404	0.000160625	0.00190076	ENSG00000164093	5308	PITX2
1783	23.5085	-2.49848	0.39711	-3.77347	0.000160992	0.00190403	ENSG00000272695	100506394	GAS6-DT
1784	1202.43	-2.43537	0.380525	-3.77207	0.000161901	0.0019137	ENSG00000117318	3399	ID3
1785	314.093	-1.50546	0.134045	-3.77078	0.000162735	0.00192248	ENSG00000116774	56944	OLFML3
1786	805.825	-1.43659	0.115885	-3.76742	0.000164944	0.00194748	ENSG00000225614	84627	ZNF469
1787	27.9881	3.09055	0.555043	3.76647	0.000165573	0.00195382	ENSG00000175325	5626	PROP1
1788	6.55568	5.87078	1.29354	3.76545	0.000166251	0.00196072	ENSG00000230045	NA	FAM90A15P
1789	729.995	-1.37214	0.0988691	-3.76397	0.00016724	0.00197128	ENSG00000170525	5209	PFKFB3
1790	62.7879	-1.84541	0.224623	-3.76368	0.000167431	0.00197242	ENSG00000184271	5463	POU6F1
1791	50.9088	-1.97091	0.258144	-3.76113	0.000169145	0.0019915	ENSG00000172346	NA	CSDC2
1792	249.214	-1.53042	0.141198	-3.75658	0.000172248	0.0020269	ENSG00000143797	129642	MBOAT2
1793	107.886	1.77405	0.206156	3.75471	0.000173542	0.00204099	ENSG00000185133	27124	INPP5J
1794	32.7399	2.48817	0.396666	3.7517	0.000175637	0.00206447	ENSG00000261115	100507421	TMEM178B
1795	102.82	1.85826	0.228961	3.74851	0.000177887	0.00208975	ENSG00000089847	170961	ANKRD24
1796	51.2461	-1.95731	0.255859	-3.74153	0.000182903	0.00214748	ENSG00000152147	79833	GEMIN6
1797	14.6516	4.39843	0.90883	3.73935	0.000184497	0.00216445	ENSG00000167419	4025	LPO
1798	79.2447	-1.73734	0.197189	-3.73927	0.000184555	0.00216445	ENSG00000178184	NA	PARD6G
1799	17.0018	-2.66804	0.446175	-3.73854	0.000185093	0.00216955	ENSG00000160886	54742	LY6K
1800	624.184	1.35714	0.0956535	3.73369	0.000188691	0.0022105	ENSG00000099899	27037	TRMT2A
1801	33.0141	-2.15845	0.310581	-3.72996	0.000191512	0.0022423	ENSG00000116721	65121	PRAMEF1
1802	80.1108	1.91182	0.244575	3.72817	0.000192872	0.00225697	ENSG00000105649	5864	RAB3A
1803	14.2817	-2.85974	0.499069	-3.72642	0.00019422	0.00227148	ENSG00000168546	2675	GFRA2
1804	175.852	1.64193	0.172473	3.72194	0.000197701	0.0023109	ENSG00000143951	51057	WDPCP
1805	22.4841	-2.51218	0.406584	-3.71922	0.000199837	0.00233457	ENSG00000223784	NA	LINP1
1806	4391.33	1.2655	0.0714034	3.71837	0.000200515	0.00234119	ENSG00000196235	6829	SUPT5H
1807	9.40766	-3.41204	0.648791	-3.71775	0.000201003	0.00234559	ENSG00000108379	7473	WNT3
1808	9.40766	-3.41204	0.648791	-3.71775	0.000201003	0.00234559	ENSG00000108379	101929777	WNT3
1809	76.2592	-1.91658	0.247109	-3.70922	0.000207899	0.00242472	ENSG00000109674	55247	NEIL3
1810	1418.74	1.33122	0.0893018	3.70896	0.000208109	0.00242583	ENSG00000157741	254048	UBN2
1811	123.767	1.77402	0.208744	3.70801	0.000208895	0.00243364	ENSG00000159685	84303	CHCHD6
1812	23.2124	3.50623	0.677052	3.70168	0.00021418	0.00249383	ENSG00000101222	NA	SPEF1
1813	3210.43	1.23689	0.0640149	3.7005	0.000215176	0.00250404	ENSG00000153395	79888	LPCAT1
1814	1313.16	-1.41043	0.110926	-3.70004	0.000215563	0.00250631	ENSG00000134318	9475	ROCK2
1815	96.0911	-1.85331	0.230625	-3.69999	0.000215609	0.00250631	ENSG00000185070	23768	FLRT2
1816	17.0646	-2.71733	0.464367	-3.69822	0.000217114	0.00252241	ENSG00000180537	221687	RNF182
1817	284.567	-1.53304	0.144187	-3.69686	0.000218287	0.00253463	ENSG00000080986	NA	NDC80
1818	177.153	1.59452	0.160844	3.69627	0.000218794	0.00253912	ENSG00000184481	4303	FOXO4
1819	54.5314	2.20857	0.327487	3.69044	0.000223869	0.00259659	ENSG00000103742	57722	IGDCC4
1820	895.53	1.38302	0.103801	3.68994	0.000224306	0.00260022	ENSG00000198315	7745	ZKSCAN8
1821	28.6401	-2.34334	0.364338	-3.68707	0.000226851	0.00262827	ENSG00000233521	105372978	LINC01638
1822	184.989	-1.53546	0.145377	-3.68326	0.000230269	0.0026664	ENSG00000088808	23368	PPP1R13B
1823	746.281	-1.31778	0.0863754	-3.6791	0.000234054	0.00270875	ENSG00000079819	2037	EPB41L2
1824	9.67332	5.65015	1.26449	3.67749	0.00023554	0.00272445	ENSG00000107593	9033	PKD2L1
1825	122.131	-1.68161	0.185532	-3.67383	0.000238938	0.00276223	ENSG00000079462	5050	PAFAH1B3
1826	59.5405	-1.96763	0.263442	-3.67304	0.000239684	0.00276933	ENSG00000147155	10682	EBP
1827	5593.72	-1.3183	0.0866695	-3.67261	0.000240088	0.00277248	ENSG00000026508	960	CD44
1828	31.9442	-2.21929	0.332459	-3.6675	0.000244935	0.0028269	ENSG00000106031	3209	HOXA13
1829	19.0747	3.4539	0.66933	3.6662	0.000246182	0.00283973	ENSG00000174562	55554	KLK15
1830	57.6096	2.03136	0.281359	3.66565	0.000246708	0.00284424	ENSG00000140470	NA	ADAMTS17
1831	25.7717	-2.2581	0.34348	-3.6628	0.000249469	0.00287449	ENSG00000243244	11037	STON1
1832	500.178	-1.46063	0.125792	-3.66188	0.000250375	0.00288336	ENSG00000162702	23528	ZNF281
1833	1009.85	1.3701	0.101119	3.66002	0.000252199	0.00290043	ENSG00000063587	10838	ZNF275
1834	39.6601	-2.00625	0.274917	-3.6602	0.000252014	0.00290043	ENSG00000188153	1287	COL4A5
1835	2360.52	1.35025	0.0956982	3.65994	0.000252271	0.00290043	ENSG00000176994	NA	SMCR8
1836	232.107	-1.93422	0.255336	-3.65878	0.000253415	0.00291199	ENSG00000204580	780	DDR1
1837	2216.22	1.28296	0.0773476	3.65827	0.000253928	0.00291629	ENSG00000151135	90488	TMEM263
1838	19.9784	-2.5049	0.411689	-3.65544	0.000256742	0.002947	ENSG00000250284	NA
1839	2914.35	1.30007	0.0821606	3.65229	0.000259912	0.00298162	ENSG00000164151	23379	ICE1
1840	1554.13	-1.28631	0.0783958	-3.65216	0.000260042	0.00298162	ENSG00000100403	NA	ZC3H7B
1841	56.0508	2.12733	0.308701	3.65187	0.00026034	0.00298341	ENSG00000167105	162461	TMEM92
1842	527.495	1.38364	0.105058	3.65165	0.000260559	0.0029843	ENSG00000047621	57102	C12orf4
1843	482.241	-1.38131	0.104435	-3.65114	0.00026108	0.00298864	ENSG00000134324	23175	LPIN1
1844	9.73659	-3.28179	0.625368	-3.64872	0.000263548	0.00301525	ENSG00000134198	10100	TSPAN2
1845	12.5357	5.52619	1.24088	3.64756	0.000264744	0.00302729	ENSG00000183019	199675	MCEMP1
1846	16.2907	-2.6806	0.460803	-3.64712	0.000265201	0.00303087	ENSG00000134986	9315	NREP
1847	1494.17	1.33516	0.0919579	3.64467	0.000267733	0.00305806	ENSG00000117410	533	ATP6V0B
1848	32.0128	2.81029	0.496713	3.64454	0.000267871	0.00305806	ENSG00000197599	645811	CCDC154
1849	363.307	1.49594	0.136205	3.64114	0.000271439	0.00309711	ENSG00000186376	NA	ZNF75D
1850	46.3553	2.31326	0.360759	3.64027	0.000272352	0.00310584	ENSG00000261770	NA
1851	27.9696	2.89842	0.521674	3.63909	0.000273606	0.00311846	ENSG00000176769	NA	TCERG1L
1852	590.73	-1.4784	0.13157	-3.63607	0.00027683	0.00315349	ENSG00000133789	23075	SWAP70
1853	32.338	-2.14823	0.316046	-3.63311	0.000280024	0.00318815	ENSG00000112414	57211	ADGRG6
1854	57.9474	2.14614	0.31574	3.63003	0.000283389	0.00322472	ENSG00000169894	NA	MUC3A
1855	41.863	2.30939	0.361117	3.62594	0.000287917	0.00327447	ENSG00000169429	3576	CXCL8
1856	1313.9	1.31135	0.0858801	3.62537	0.000288546	0.00327985	ENSG00000167977	54442	KCTD5
1857	1933.38	-1.35198	0.0971438	-3.62327	0.000290904	0.00330487	ENSG00000177425	5074	PAWR
1858	1213.64	1.31316	0.0864569	3.62221	0.000292101	0.00331511	ENSG00000155252	55361	PI4K2A
1859	22.4765	-2.38523	0.38243	-3.62219	0.00029212	0.00331511	ENSG00000168646	8313	AXIN2
1860	7.82946	5.65836	1.28686	3.61995	0.000294658	0.00334211	ENSG00000101204	1137	CHRNA4
1861	342.527	1.44525	0.123062	3.61811	0.000296759	0.00336412	ENSG00000162694	2135	EXTL2
1862	197.949	1.61954	0.171266	3.61738	0.000297595	0.00337178	ENSG00000125846	7692	ZNF133
1863	154.414	1.63998	0.177007	3.61556	0.000299704	0.00339385	ENSG00000176399	NA	DMRTA1
1864	890.827	-1.28873	0.0798609	-3.61541	0.000299877	0.00339398	ENSG00000170145	23235	SIK2
1865	1792.05	1.30157	0.0834542	3.6136	0.000301972	0.00341402	ENSG00000183431	10946	SF3A3
1866	149.824	-1.56647	0.156755	-3.6137	0.000301854	0.00341402	ENSG00000259848	442028
1867	16.668	4.29245	0.911514	3.61207	0.000303759	0.00343238	ENSG00000141506	23533	PIK3R5
1868	531.507	-1.34591	0.095771	-3.61189	0.000303974	0.00343297	ENSG00000173786	1267	CNP
1869	84.0376	1.87194	0.241432	3.61154	0.000304383	0.00343574	ENSG00000130775	9473	THEMIS2
1870	28.7229	-2.18038	0.327393	-3.6054	0.000311668	0.0035142	ENSG00000272841	NA	MAP3K4-AS1
1871	197.594	1.65672	0.182148	3.60542	0.000311652	0.0035142	ENSG00000149743	83707	TRPT1
1872	7.38853	5.61107	1.27954	3.60369	0.000313736	0.00353562	ENSG00000253775	NA
1873	533.217	-1.45389	0.125988	-3.60267	0.000314967	0.00354759	ENSG00000169607	150468	CKAP2L
1874	136.933	-1.7197	0.199905	-3.6002	0.000317971	0.00357952	ENSG00000165757	57608	JCAD
1875	47.1915	-1.89994	0.250031	-3.5993	0.000319072	0.00358999	ENSG00000085276	2122	MECOM
1876	102.601	-1.69198	0.192283	-3.59874	0.000319764	0.00359585	ENSG00000138622	10021	HCN4
1877	35.941	2.34709	0.374691	3.5952	0.000324148	0.00364321	ENSG00000204618	80352	RNF39
1878	108.199	-1.63039	0.175427	-3.59347	0.000326304	0.00366548	ENSG00000121068	6909	TBX2
1879	1596.13	1.3538	0.0984734	3.59286	0.00032707	0.00367212	ENSG00000179632	84232	MAF1
1880	83.1281	-1.69997	0.194839	-3.59254	0.000327467	0.00367462	ENSG00000130940	54897	CASZ1
1881	13.8208	-2.79244	0.498992	-3.59213	0.00032799	0.00367852	ENSG00000231566	NA	LINC02595
1882	1530.43	1.29005	0.080805	3.5895	0.000331313	0.00371382	ENSG00000092203	9878	TOX4
1883	322.389	1.42267	0.117782	3.58858	0.00033249	0.00372502	ENSG00000213859	NA	KCTD11
1884	19.3503	-2.58184	0.440835	-3.58828	0.00033287	0.00372729	ENSG00000197580	83875	BCO2
1885	165.282	-1.5349	0.149081	-3.58798	0.000333251	0.00372958	ENSG00000115163	1058	CENPA
1886	369.873	-1.38764	0.108103	-3.58584	0.000335994	0.00375681	ENSG00000106049	11112	HIBADH
1887	77.0869	-1.83946	0.234107	-3.5858	0.000336042	0.00375681	ENSG00000184602	8303	SNN
1888	19.8302	2.85083	0.516677	3.58217	0.000340752	0.00380744	ENSG00000055118	3757	KCNH2
1889	429.912	1.45927	0.128263	3.5807	0.000342676	0.00382692	ENSG00000145348	93627	TBCK
1890	55.1221	-1.94508	0.263964	-3.58035	0.000343134	0.00383	ENSG00000134253	80263	TRIM45
1891	1398.88	1.35775	0.0999339	3.5799	0.000343729	0.0038346	ENSG00000106080	55033	FKBP14
1892	8.59	5.56338	1.27513	3.57876	0.000345223	0.00384923	ENSG00000189233	NA	NUGGC
1893	45.4772	2.24138	0.347024	3.57722	0.000347269	0.00386999	ENSG00000070669	440	ASNS
1894	598.287	1.3722	0.104067	3.57658	0.000348115	0.00387736	ENSG00000100889	5106	PCK2
1895	103.963	-1.59581	0.166613	-3.57604	0.000348839	0.00388337	ENSG00000169689	201254	CENPX
1896	21.1973	2.99928	0.559172	3.57542	0.000349661	0.00389047	ENSG00000102981	50855	PARD6A
1897	214.262	-1.9476	0.265102	-3.57447	0.000350939	0.00390262	ENSG00000135272	29969	MDFIC
1898	10.3079	-3.17266	0.60823	-3.5721	0.000354133	0.00393461	ENSG00000164761	4982	TNFRSF11B
1899	217.19	1.54686	0.153095	3.57206	0.000354189	0.00393461	ENSG00000198453	374900	ZNF568
1900	24.9515	-2.22426	0.343138	-3.56784	0.000359941	0.00399639	ENSG00000183840	NA	GPR39
1901	81.5506	1.84667	0.237344	3.56726	0.000360729	0.00400303	ENSG00000198590	339883	APRG1
1902	7.81478	-3.60617	0.731272	-3.56389	0.000365399	0.00405271	ENSG00000166317	79933	SYNPO2L
1903	57.2542	-1.87024	0.24421	-3.56351	0.000365929	0.00405583	ENSG00000137135	84904	ARHGEF39
1904	10.179	5.60219	1.29151	3.56341	0.000366065	0.00405583	ENSG00000135472	23017	FAIM2
1905	14.4775	-2.67312	0.470099	-3.55908	0.000372152	0.0041211	ENSG00000185652	4908	NTF3
1906	332.587	-1.4326	0.121562	-3.55867	0.000372737	0.0041254	ENSG00000184270	317772	H2AC21
1907	22.2035	-2.347	0.378722	-3.55671	0.000375534	0.00415417	ENSG00000273117	NA	INSIG1-DT
1908	152.418	-1.54118	0.152191	-3.55595	0.00037661	0.00416389	ENSG00000143341	83872	HMCN1
1909	9.12579	5.57816	1.28774	3.55518	0.000377723	0.004174	ENSG00000070985	29850	TRPM5
1910	424.463	1.42853	0.120604	3.55318	0.0003806	0.00420358	ENSG00000095574	64376	IKZF5
1911	124.461	1.68961	0.194138	3.55219	0.000382042	0.0042173	ENSG00000161551	84765	ZNF577
1912	236.515	-1.44469	0.125237	-3.55078	0.000384091	0.00423769	ENSG00000170779	55038	CDCA4
1913	410.655	-1.77189	0.217401	-3.55055	0.00038443	0.00423828	ENSG00000134668	90853	SPOCD1
1914	424.472	-1.90075	0.253699	-3.55047	0.000384547	0.00423828	ENSG00000155090	7071	KLF10
1915	135.064	-1.58383	0.164456	-3.5501	0.000385085	0.00424199	ENSG00000082126	58538	MPP4
1916	50.6042	2.12942	0.31823	3.54906	0.000386608	0.00425653	ENSG00000130475	23149	FCHO1
1917	352.503	-1.45976	0.129556	-3.54871	0.000387122	0.00425996	ENSG00000149260	726	CAPN5
1918	30.6022	-2.18447	0.334006	-3.54626	0.000390743	0.00429755	ENSG00000112837	NA	TBX18
1919	936.882	-1.40269	0.113561	-3.54602	0.000391099	0.00429923	ENSG00000068366	2182	ACSL4
1920	91.2661	1.81449	0.229875	3.54317	0.000395355	0.00434374	ENSG00000170049	9196	KCNAB3
1921	58.5778	-1.81794	0.230863	-3.54296	0.000395659	0.00434481	ENSG00000043355	7546	ZIC2
1922	27.1748	-2.20291	0.339645	-3.54166	0.000397614	0.00436401	ENSG00000203721	554279	LINC00862
1923	17113.2	-1.29705	0.0839135	-3.5399	0.000400279	0.00439097	ENSG00000067225	5315	PKM
1924	8.93153	-3.30207	0.650545	-3.53868	0.000402139	0.00440907	ENSG00000259498	NA	TPM1-AS
1925	169.66	-1.55365	0.15648	-3.53814	0.000402952	0.00441568	ENSG00000178966	80010	RMI1
1926	59.8313	1.98736	0.279151	3.53702	0.000404668	0.00443217	ENSG00000279712	NA
1927	42.9294	2.44509	0.408798	3.53497	0.000407821	0.00446439	ENSG00000177757	400728	FAM87B
1928	28.8356	2.39613	0.394985	3.53463	0.00040834	0.00446775	ENSG00000183208	390637	GDPGP1
1929	8.32023	-3.53217	0.716917	-3.53203	0.00041238	0.00450961	ENSG00000145861	114898	C1QTNF2
1930	20.4117	3.0343	0.576106	3.53112	0.000413806	0.00452284	ENSG00000167874	92162	TMEM88
1931	842.716	1.36162	0.102457	3.52945	0.00041642	0.00454905	ENSG00000051596	84321	THOC3
1932	255.778	1.49765	0.14114	3.52591	0.000422023	0.00460787	ENSG00000182179	7318	UBA7
1933	532.682	-1.43667	0.123852	-3.52574	0.000422301	0.00460851	ENSG00000138356	316	AOX1
1934	6.20973	-5.11852	1.16871	-3.524	0.00042509	0.00463654	ENSG00000164508	221613	H2AC1
1935	415.755	-1.43639	0.123857	-3.52336	0.000426113	0.00464529	ENSG00000137713	5519	PPP2R1B
1936	16.596	-2.55179	0.44055	-3.52239	0.000427668	0.00465984	ENSG00000286696	NA
1937	33.3899	-2.04934	0.297986	-3.52144	0.00042921	0.00467422	ENSG00000154822	23228	PLCL2
1938	22.0307	2.96581	0.558397	3.52045	0.000430818	0.0046893	ENSG00000150051	283078	MKX
1939	7.22894	5.60033	1.30692	3.51998	0.000431572	0.00469507	ENSG00000006071	6833	ABCC8
1940	553.637	-1.33438	0.0950133	-3.51934	0.000432617	0.00470402	ENSG00000132646	5111	PCNA
1941	42.9756	2.18847	0.337734	3.51896	0.000433246	0.00470842	ENSG00000272316	NA
1942	16.8285	4.16563	0.899714	3.51848	0.000434024	0.00471444	ENSG00000179477	242	ALOX12B
1943	52.9022	2.1095	0.315477	3.51689	0.000436642	0.00474043	ENSG00000129295	23639	DNAAF11
1944	380.321	1.40346	0.114788	3.51488	0.000439952	0.0047739	ENSG00000220205	6844	VAMP2
1945	50.4694	2.20257	0.342151	3.51473	0.000440194	0.00477406	ENSG00000261140	NA
1946	104.106	1.8014	0.228076	3.51377	0.000441801	0.00478656	ENSG00000234284	345462	ZNF879
1947	384.724	1.43466	0.123702	3.51379	0.000441758	0.00478656	ENSG00000120697	29880	ALG5
1948	54.2207	1.97297	0.27713	3.51087	0.000446638	0.00483448	ENSG00000158220	83850	ESYT3
1949	15.8721	-2.5621	0.444937	-3.51085	0.000446684	0.00483448	ENSG00000182472	147968	CAPN12
1950	267.269	1.51457	0.1467	3.50763	0.000452121	0.00489081	ENSG00000100058	1416	CRYBB2P1
1951	7.00594	5.55857	1.30055	3.50512	0.000456394	0.0049345	ENSG00000105675	495	ATP4A
1952	11.0304	-2.94453	0.554939	-3.50405	0.000458231	0.00495182	ENSG00000188783	5549	PRELP
1953	24.4699	2.84022	0.525351	3.50283	0.000460346	0.00497212	ENSG00000174844	201625	DNAH12
1954	492.934	-1.36246	0.103612	-3.4982	0.000468409	0.0050566	ENSG00000020577	23034	SAMD4A
1955	25.0127	2.48333	0.424344	3.49558	0.000473033	0.0051039	ENSG00000250130	NA	GAPDHP43
1956	39.629	-3.17017	0.620949	-3.49492	0.0004742	0.00511388	ENSG00000140807	85407	NKD1
1957	19.9599	-2.52238	0.435744	-3.49374	0.000476306	0.00513395	ENSG00000170899	2941	GSTA4
1958	4533.25	1.27083	0.077767	3.48261	0.000496557	0.0053495	ENSG00000038219	259282	BOD1L1
1959	6.55945	5.50217	1.29398	3.47931	0.000502699	0.00541289	ENSG00000092054	4625	MYH7
1960	6.22058	5.50769	1.29601	3.47813	0.000504916	0.00543398	ENSG00000240751	NA
1961	11643	-1.29073	0.083595	-3.47783	0.000505487	0.00543735	ENSG00000026025	7431	VIM
1962	97.4001	1.74575	0.214477	3.47709	0.000506894	0.0054497	ENSG00000188611	56624	ASAH2
1963	7.94504	5.45998	1.28311	3.4759	0.000509135	0.00547099	ENSG00000143365	6097	RORC
1964	14.3684	-2.72331	0.495815	-3.47571	0.000509494	0.00547206	ENSG00000154493	118611	C10orf90
1965	16.2039	5.30687	1.23929	3.47528	0.000510322	0.00547815	ENSG00000238121	100188949	LINC00426
1966	1047.02	1.34993	0.100762	3.47288	0.000514898	0.00552158	ENSG00000234745	3106	HLA-B
1967	5295.15	1.29921	0.0861594	3.47278	0.000515093	0.00552158	ENSG00000172115	54205	CYCS
1968	380.718	-1.42139	0.121342	-3.47275	0.000515155	0.00552158	ENSG00000124920	745	MYRF
1969	21.8062	-2.32124	0.380885	-3.46886	0.000522672	0.0055993	ENSG00000256463	NA	SALL3
1970	293.942	1.54656	0.157639	3.46713	0.000526055	0.00563267	ENSG00000136169	83852	SETDB2
1971	88.2836	-1.67645	0.19517	-3.46595	0.000528356	0.00565443	ENSG00000180233	NA	ZNRF2
1972	16.5884	-2.51343	0.436977	-3.4634	0.000533391	0.00570541	ENSG00000132749	9633	TESMIN
1973	600.149	-1.32015	0.0924818	-3.46181	0.000536554	0.00573633	ENSG00000086289	54749	EPDR1
1974	241.863	1.50229	0.14524	3.45834	0.000543519	0.00580784	ENSG00000186104	120227	CYP2R1
1975	23.3183	-2.30573	0.377829	-3.45589	0.000548487	0.00585796	ENSG00000183023	6546	SLC8A1
1976	43.334	-1.99602	0.288287	-3.45495	0.000550401	0.00587541	ENSG00000244586	NA	WNT5A-AS1
1977	1204.35	1.28072	0.0812921	3.45324	0.000553903	0.00590979	ENSG00000188636	NA	RTL6
1978	1133.99	-1.32647	0.0945869	-3.45149	0.000557499	0.00593937	ENSG00000154978	81552	VOPP1
1979	170.988	1.56429	0.163485	3.45164	0.000557182	0.00593937	ENSG00000256683	59348	ZNF350
1980	83.2691	-1.66805	0.193554	-3.45148	0.000557522	0.00593937	ENSG00000100285	4744	NEFH
1981	5.88725	5.62208	1.33926	3.45121	0.000558071	0.00594222	ENSG00000163995	84448	ABLIM2
1982	81.1806	-1.68764	0.1993	-3.45027	0.000560022	0.00595998	ENSG00000166448	222865	TMEM130
1983	1613.06	-1.24601	0.0713839	-3.44634	0.000568241	0.00604133	ENSG00000196428	9819	TSC22D2
1984	13.2326	5.32566	1.2551	3.44645	0.000567995	0.00604133	ENSG00000183034	92736	OTOP2
1985	8.73521	-3.41122	0.699813	-3.44552	0.000569972	0.00605667	ENSG00000128606	10234	LRRC17
1986	40.3117	-2.10087	0.31964	-3.4441	0.000572969	0.00608544	ENSG00000186469	54331	GNG2
1987	73.5891	1.85853	0.24944	3.44183	0.000577792	0.00613357	ENSG00000237491	105378580	LINC01409
1988	123.558	-1.58076	0.168766	-3.44118	0.000579181	0.00614212	ENSG00000159423	8659	ALDH4A1
1989	58.8622	1.98108	0.285091	3.44131	0.000578914	0.00614212	ENSG00000279530	NA
1990	61.3086	-1.77405	0.225009	-3.44009	0.000581516	0.00616377	ENSG00000255495	NA
1991	5.2522	5.57121	1.32888	3.43989	0.000581952	0.00616529	ENSG00000132911	56923	NMUR2
1992	401.448	-1.39544	0.114979	-3.4392	0.000583441	0.00617796	ENSG00000156504	159090	PABIR2
1993	29.6971	2.41108	0.410452	3.43787	0.000586312	0.00620524	ENSG00000279057	NA
1994	16.4184	3.23729	0.650856	3.43746	0.000587207	0.00621158	ENSG00000128284	80833	APOL3
1995	28.8533	-2.2448	0.362191	-3.43687	0.000588478	0.0062219	ENSG00000105464	2906	GRIN2D
1996	28.493	3.06157	0.600009	3.4359	0.00059059	0.00624109	ENSG00000102032	5973	RENBP
1997	11.7762	-2.94378	0.566445	-3.43154	0.000600162	0.00633906	ENSG00000239332	100134259	LINC01119
1998	120.814	-1.70618	0.20582	-3.43106	0.000601231	0.00634717	ENSG00000120708	7045	TGFBI
1999	19.5326	-2.33355	0.388973	-3.42838	0.000607196	0.00640693	ENSG00000183850	100129543	ZNF730
[truncated: 26,997 more rows]

## Sheet: Output_DESeq2_γ-T3_vs_VC
	baseMean	log2FoldChange	lfcSE	stat	pvalue	padj	gene	entrezgene_id	external_gene_name
1	5835.64	4.45372	0.0967221	35.7076	3.00901e-279	7.34169e-275	ENSG00000051108	9709	HERPUD1
2	75981.2	3.66323	0.0885094	30.0897	6.59961e-199	8.0512e-195	ENSG00000044574	3309	HSPA5
3	5041.85	3.30951	0.087964	26.2551	6.24554e-152	5.0795e-148	ENSG00000052749	23223	RRP12
4	2245.39	3.86699	0.10947	26.1896	3.49068e-151	2.12923e-147	ENSG00000152409	133746	JMY
5	2365.38	3.49147	0.096496	25.8194	5.37262e-147	2.62173e-143	ENSG00000112379	NA	ARFGEF3
6	845.417	4.35592	0.137037	24.4892	1.92509e-132	7.82838e-129	ENSG00000243742	113157	RPLP0P2
7	2216.16	3.72014	0.111905	24.3075	1.63368e-130	5.69431e-127	ENSG00000101255	57761	TRIB3
8	2205.86	4.09365	0.131072	23.6027	3.61678e-123	1.10307e-119	ENSG00000128590	4189	DNAJB9
9	907.147	-2.86191	0.0844301	-22.0526	9.00943e-108	2.44246e-104	ENSG00000186480	3638	INSIG1
10	1030.26	3.58546	0.118461	21.8254	1.33279e-105	3.25187e-102	ENSG00000114388	10641	NPRL2
11	1968.9	2.85404	0.0870063	21.3093	9.31014e-101	2.06507e-97	ENSG00000117682	79947	DHDDS
12	713.567	5.9366	0.233553	21.1369	3.63862e-99	7.39823e-96	ENSG00000139269	83729	INHBE
13	4803.51	2.70986	0.0826681	20.6834	4.88305e-95	9.16473e-92	ENSG00000140941	81631	MAP1LC3B
14	409.306	-3.89591	0.141216	-20.5069	1.86731e-93	3.25433e-90	ENSG00000185697	4603	MYBL1
15	283.555	-4.98926	0.196104	-20.3426	5.39643e-92	8.77783e-89	ENSG00000138347	84665	MYPN
16	1717.31	2.99963	0.0991891	20.1598	2.20964e-90	3.36957e-87	ENSG00000133103	57511	COG6
17	598.795	4.23671	0.16066	20.1464	2.89569e-90	4.156e-87	ENSG00000175197	1649	DDIT3
18	592.355	-2.99879	0.100885	-19.8125	2.32342e-87	3.1494e-84	ENSG00000144810	1295	COL8A1
19	788.217	3.78973	0.142295	19.6053	1.3926e-85	1.78831e-82	ENSG00000140830	54957	TXNL4B
20	4745.75	2.59512	0.0813797	19.6009	1.51924e-85	1.8534e-82	ENSG00000105835	10135	NAMPT
21	2145.11	-2.99644	0.102553	-19.4673	2.08063e-84	2.41739e-81	ENSG00000145934	57451	TENM2
22	565.641	-3.58468	0.133023	-19.4303	4.27516e-84	4.74134e-81	ENSG00000106829	7091	TLE4
23	1498.63	2.70484	0.0880214	19.3685	1.42482e-83	1.51148e-80	ENSG00000166123	84706	GPT2
24	991.481	-2.80609	0.0980952	-18.4116	1.06072e-75	1.07836e-72	ENSG00000183688	359845	RFLNB
25	2514.61	2.37605	0.0750657	18.3313	4.65637e-75	4.54443e-72	ENSG00000100883	6729	SRP54
26	877.175	-2.71334	0.0944789	-18.1347	1.69742e-73	1.5929e-70	ENSG00000112972	3157	HMGCS1
27	1581.45	2.51055	0.0834302	18.1055	2.88292e-73	2.6052e-70	ENSG00000159399	3099	HK2
28	306.627	-3.3293	0.129805	-17.9446	5.29227e-72	4.61164e-69	ENSG00000120437	39	ACAT2
29	1841.75	2.91372	0.107545	17.7945	7.79559e-71	6.55878e-68	ENSG00000132510	23135	KDM6B
30	11834.5	2.66748	0.093916	17.755	1.57728e-70	1.2828e-67	ENSG00000149428	10525	HYOU1
31	909.946	-2.55403	0.0876619	-17.7275	2.57014e-70	2.02286e-67	ENSG00000079459	2222	FDFT1
32	2284.67	-2.61868	0.0919455	-17.6047	2.26543e-69	1.72732e-66	ENSG00000064666	1265	CNN2
33	1225.82	2.60919	0.0916211	17.5635	4.68554e-69	3.46432e-66	ENSG00000156502	6832	SUPV3L1
34	2866.59	2.43175	0.0820544	17.4488	3.51713e-68	2.52395e-65	ENSG00000136868	1317	SLC31A1
35	1975.92	2.33309	0.076895	17.3365	2.49386e-67	1.7385e-64	ENSG00000112715	7422	VEGFA
36	703.37	3.02085	0.11683	17.2974	4.9248e-67	3.33779e-64	ENSG00000099337	9424	KCNK6
37	542.326	-2.87016	0.108701	-17.2046	2.45375e-66	1.61808e-63	ENSG00000052802	6307	MSMO1
38	541.095	-3.32761	0.135602	-17.165	4.85103e-66	3.11474e-63	ENSG00000138771	57619	SHROOM3
39	1996.4	2.6649	0.0976898	17.0428	3.95631e-65	2.47513e-62	ENSG00000104907	55621	TRMT1
40	769.838	3.57672	0.151608	16.996	8.79681e-65	5.36584e-62	ENSG00000162772	467	ATF3
41	495.011	-3.2269	0.131319	-16.9579	1.68228e-64	1.00112e-61	ENSG00000112144	22858	CILK1
42	1514.83	2.51478	0.0894053	16.9428	2.17366e-64	1.26274e-61	ENSG00000179562	NA	GCC1
43	1479.41	2.71003	0.101495	16.8485	1.07558e-63	6.10303e-61	ENSG00000070444	4335	MNT
44	714.629	5.16969	0.248375	16.7879	2.99337e-63	1.65989e-60	ENSG00000215895	NA	HSPA5P1
45	3260.84	2.37564	0.0821433	16.7468	5.97059e-63	3.23725e-60	ENSG00000055483	57602	USP36
46	378.875	5.51002	0.269687	16.7232	8.88398e-63	4.71218e-60	ENSG00000155961	116442	RAB39B
47	708.194	2.98954	0.119335	16.672	2.09638e-62	1.08829e-59	ENSG00000157796	57728	WDR19
48	374.963	4.94547	0.236965	16.65	3.02363e-62	1.53695e-59	ENSG00000119508	8013	NR4A3
49	307.736	-3.70118	0.162271	-16.6461	3.23143e-62	1.60906e-59	ENSG00000172159	257019	FRMD3
50	2988.9	2.32297	0.0797226	16.5946	7.62074e-62	3.71877e-59	ENSG00000128607	23008	KLHDC10
51	1974.69	-2.58806	0.0957766	-16.5809	9.57555e-62	4.58106e-59	ENSG00000154678	5137	PDE1C
52	391.02	4.01166	0.182187	16.5306	2.21052e-61	1.0372e-58	ENSG00000230882	NA
53	1136.24	2.41737	0.0857566	16.5279	2.31161e-61	1.06417e-58	ENSG00000179119	144108	SPTY2D1
54	204.705	-3.7929	0.169053	-16.5209	2.59561e-61	1.17278e-58	ENSG00000180914	5021	OXTR
55	4238.64	2.0588	0.0641891	16.495	3.98366e-61	1.76722e-58	ENSG00000120742	NA	SERP1
56	1614.03	2.4898	0.0906487	16.4349	1.07648e-60	4.69016e-58	ENSG00000135241	50640	PNPLA8
57	382.05	4.68687	0.224443	16.4268	1.23011e-60	5.26551e-58	ENSG00000135253	375616	KCP
58	2416.26	2.46911	0.0897104	16.3762	2.83038e-60	1.19066e-57	ENSG00000242802	9907	AP5Z1
59	911.985	2.55723	0.0960395	16.2145	3.98628e-59	1.64849e-56	ENSG00000244405	NA	ETV5
60	1248.07	2.90921	0.117997	16.1802	6.95637e-59	2.82881e-56	ENSG00000179094	5187	PER1
61	730.027	-2.98605	0.122839	-16.1679	8.49911e-59	3.34467e-56	ENSG00000146072	NA	TNFRSF21
62	692.94	2.78192	0.110213	16.1679	8.48952e-59	3.34467e-56	ENSG00000150527	4253	MIA2
63	2052.87	-2.84847	0.114557	-16.1358	1.42854e-58	5.53254e-56	ENSG00000114019	51421	AMOTL2
64	1366.82	2.43584	0.0889922	16.1345	1.45991e-58	5.5657e-56	ENSG00000121749	64786	TBC1D15
65	635.212	2.93963	0.120317	16.121	1.81723e-58	6.82131e-56	ENSG00000119899	26503	SLC17A5
66	567.561	3.48125	0.154096	16.102	2.47044e-58	9.13278e-56	ENSG00000197852	55924	INKA2
67	2915.82	2.20625	0.0749988	16.0835	3.32771e-58	1.21183e-55	ENSG00000104419	10397	NDRG1
68	1261.31	2.56501	0.097503	16.0509	5.63104e-58	2.02047e-55	ENSG00000177380	8541	PPFIA3
69	626.071	2.98812	0.124571	15.9598	2.43628e-57	8.61489e-55	ENSG00000163818	54585	LZTFL1
70	303.427	-3.30505	0.144635	-15.9371	3.50508e-57	1.22172e-54	ENSG00000146426	26230	TIAM2
71	940.962	2.59691	0.100547	15.8822	8.41781e-57	2.89276e-54	ENSG00000258890	90799	CEP95
72	3726.64	-2.64195	0.1034	-15.8795	8.78425e-57	2.97676e-54	ENSG00000022267	2273	FHL1
73	508.498	3.60864	0.165427	15.7691	5.07671e-56	1.6968e-53	ENSG00000137494	338699	ANKRD42
74	1327.58	2.53325	0.0973553	15.749	6.97908e-56	2.30112e-53	ENSG00000137414	NA	FAM8A1
75	337.939	-3.21349	0.141055	-15.6924	1.70405e-55	5.54362e-53	ENSG00000198033	NA	TUBA3C
76	561.757	-5.26078	0.271833	-15.6743	2.26855e-55	7.28293e-53	ENSG00000118523	1490	CCN2
77	5094.78	2.10966	0.0708431	15.6636	2.68395e-55	8.50462e-53	ENSG00000173230	2804	GOLGB1
78	1525	-2.72065	0.109989	-15.6439	3.65512e-55	1.14335e-52	ENSG00000171848	6241	RRM2
79	891.85	2.75017	0.112013	15.6247	4.94148e-55	1.52617e-52	ENSG00000113811	NA	SELENOK
80	1882.23	-2.45862	0.0937834	-15.5531	1.51609e-54	4.62388e-52	ENSG00000137831	55075	UACA
81	662.858	2.94693	0.12537	15.5295	2.19097e-54	6.59968e-52	ENSG00000060762	51660	MPC1
82	1484.45	2.39444	0.0902205	15.4559	6.881e-54	2.04743e-51	ENSG00000136643	26750	RPS6KC1
83	1182.69	2.72535	0.112292	15.3649	2.81587e-53	8.27763e-51	ENSG00000128923	54629	MINDY2
84	976.871	2.60183	0.104345	15.3513	3.47325e-53	1.00885e-50	ENSG00000172071	9451	EIF2AK3
85	1753.61	2.59929	0.104509	15.3029	7.31503e-53	2.09976e-50	ENSG00000091592	22861	NLRP1
86	436.954	3.43438	0.159124	15.2986	7.81626e-53	2.21755e-50	ENSG00000130513	9518	GDF15
87	871.383	2.56546	0.102913	15.2114	2.97005e-52	8.32946e-50	ENSG00000160570	162989	DEDD2
88	2173.19	2.21956	0.0802498	15.1971	3.69602e-52	1.02476e-49	ENSG00000144747	NA	TMF1
89	2810.99	2.16654	0.0769427	15.1611	6.39995e-52	1.75452e-49	ENSG00000127526	79939	SLC35E1
90	220.263	-3.19678	0.145175	-15.1319	9.97407e-52	2.70397e-49	ENSG00000109084	27346	TMEM97
91	862.559	2.79631	0.118845	15.1148	1.29406e-51	3.46963e-49	ENSG00000198718	23116	TOGARAM1
92	2034.61	2.37613	0.0910528	15.1135	1.31981e-51	3.50022e-49	ENSG00000107175	NA	CREB3
93	2714.88	-2.75274	0.116738	-15.0144	5.91168e-51	1.55096e-48	ENSG00000129116	23022	PALLD
94	3096.39	2.2344	0.0823032	14.9982	7.54495e-51	1.9584e-48	ENSG00000118217	22926	ATF6
95	1920.87	-2.60186	0.106878	-14.9877	8.8409e-51	2.27062e-48	ENSG00000163430	11167	FSTL1
96	529.63	-6.18647	0.346374	-14.9736	1.09255e-50	2.77678e-48	ENSG00000117525	2152	F3
97	353.872	3.68547	0.179398	14.9694	1.16411e-50	2.92816e-48	ENSG00000135116	8739	HRK
98	12164.1	1.83748	0.0560797	14.9337	1.9887e-50	4.95127e-48	ENSG00000106105	2617	GARS1
99	1260.97	2.32277	0.0888182	14.893	3.66105e-50	9.02283e-48	ENSG00000211460	7247	TSN
100	321.393	-3.39474	0.161146	-14.8607	5.93193e-50	1.44733e-47	ENSG00000198796	115701	ALPK2
101	126.433	-4.55528	0.23926	-14.8595	6.04035e-50	1.45919e-47	ENSG00000204682	NA	MIR1915HG
102	425.705	-3.03242	0.136869	-14.8494	7.01458e-50	1.67793e-47	ENSG00000127334	8445	DYRK2
103	369.973	-3.23694	0.150784	-14.8354	8.64619e-50	2.04814e-47	ENSG00000188549	388115	CCDC9B
104	2173.47	-2.43946	0.0970459	-14.8328	8.99346e-50	2.10992e-47	ENSG00000188229	NA	TUBB4B
105	1168.34	2.31634	0.088958	14.7973	1.52525e-49	3.54425e-47	ENSG00000128335	23780	APOL2
106	1586.91	-2.72259	0.116918	-14.7334	3.93424e-49	9.05579e-47	ENSG00000092820	7430	EZR
107	1079.47	-2.87424	0.127287	-14.7245	4.48664e-49	1.02308e-46	ENSG00000196923	9260	PDLIM7
108	1339.06	-2.28069	0.0870605	-14.7103	5.53548e-49	1.25056e-46	ENSG00000167552	7846	TUBA1A
109	467.192	3.38721	0.162463	14.6939	7.05628e-49	1.57951e-46	ENSG00000114796	54800	KLHL24
110	2853.34	2.2966	0.0882595	14.6908	7.38243e-49	1.63749e-46	ENSG00000214655	23053	ZSWIM8
111	1012.6	2.741	0.118613	14.678	8.9241e-49	1.96161e-46	ENSG00000068971	5526	PPP2R5B
112	606.46	-2.51524	0.103439	-14.6487	1.37222e-48	2.98936e-46	ENSG00000040275	54908	SPDL1
113	414.807	-2.86869	0.1276	-14.6449	1.45131e-48	3.13367e-46	ENSG00000113645	23286	WWC1
114	3542.01	-2.721	0.117585	-14.6363	1.64893e-48	3.52915e-46	ENSG00000035403	7414	VCL
115	619.586	3.06293	0.140994	14.6313	1.77326e-48	3.76224e-46	ENSG00000163644	152926	PPM1K
116	472.753	2.94023	0.133156	14.5711	4.29179e-48	9.02719e-46	ENSG00000137171	89953	KLC4
117	4151.54	2.56698	0.107793	14.5369	7.06873e-48	1.4741e-45	ENSG00000087074	NA	PPP1R15A
118	679.912	2.82508	0.125744	14.5142	9.8492e-48	2.03653e-45	ENSG00000187193	4501	MT1X
119	4509.98	-2.24188	0.0855799	-14.5113	1.02682e-47	2.10532e-45	ENSG00000075618	6624	FSCN1
120	1917.54	2.03936	0.0718578	14.4641	2.04397e-47	4.1559e-45	ENSG00000110619	833	CARS1
121	1383.98	-2.59477	0.110665	-14.4108	4.42589e-47	8.92457e-45	ENSG00000118985	22936	ELL2
122	1236.83	2.25484	0.0874449	14.3501	1.06399e-46	2.12789e-44	ENSG00000138942	91445	RNF185
123	779.397	2.57998	0.110287	14.3261	1.50225e-46	2.97995e-44	ENSG00000147905	84186	ZCCHC7
124	645.837	2.73252	0.121224	14.2918	2.4605e-46	4.84144e-44	ENSG00000047346	56204	FAM214A
125	932.337	2.36398	0.0957816	14.2405	5.13266e-46	1.00185e-43	ENSG00000130733	78992	YIPF2
126	1467.64	2.23747	0.0869519	14.2317	5.82582e-46	1.12813e-43	ENSG00000012822	57658	CALCOCO1
127	10085	-2.34951	0.0951087	-14.1891	1.06996e-45	2.05559e-43	ENSG00000130402	81	ACTN4
128	659.441	2.57	0.1107	14.1825	1.1765e-45	2.24262e-43	ENSG00000128965	79094	CHAC1
129	634.037	2.58183	0.11162	14.1716	1.37392e-45	2.59863e-43	ENSG00000143457	55204	GOLPH3L
130	402.621	3.21849	0.156938	14.1361	2.27612e-45	4.27193e-43	ENSG00000214595	400954	EML6
131	430.053	6.94506	0.421441	14.1065	3.46328e-45	6.45042e-43	ENSG00000187908	1755	DMBT1
132	3117.16	2.02964	0.0732283	14.0607	6.62082e-45	1.2238e-42	ENSG00000104765	665	BNIP3L
133	2231.64	2.154	0.0822293	14.034	9.65932e-45	1.77201e-42	ENSG00000120686	51569	UFM1
134	24469.1	-3.26718	0.161574	-14.0318	9.95785e-45	1.80054e-42	ENSG00000184009	71	ACTG1
135	776.552	-2.42227	0.10136	-14.0318	9.96241e-45	1.80054e-42	ENSG00000100297	4174	MCM5
136	1724.55	-2.24104	0.0884948	-14.0239	1.11382e-44	1.99825e-42	ENSG00000103335	9780	PIEZO1
137	1205.23	2.3668	0.0975311	14.014	1.27957e-44	2.27884e-42	ENSG00000157800	84255	SLC37A3
138	1042.68	2.25198	0.0896612	13.9635	2.60294e-44	4.6021e-42	ENSG00000125812	64412	GZF1
139	2715.46	2.59801	0.114498	13.9566	2.86732e-44	5.03307e-42	ENSG00000162298	84447	SYVN1
140	313.778	-3.38284	0.170838	-13.948	3.23628e-44	5.64015e-42	ENSG00000221866	91584	PLXNA4
141	558.336	-2.79136	0.128829	-13.9049	5.91148e-44	1.02294e-41	ENSG00000155816	56776	FMN2
142	251.305	4.77999	0.272087	13.8925	7.0295e-44	1.20784e-41	ENSG00000133134	84707	BEX2
143	72401.9	-2.43158	0.10336	-13.8505	1.26303e-43	2.155e-41	ENSG00000075624	60	ACTB
144	1097.38	2.25259	0.0906195	13.8226	1.86335e-43	3.15722e-41	ENSG00000125952	4149	MAX
145	2048.55	-2.61954	0.11755	-13.7774	3.48461e-43	5.86351e-41	ENSG00000188157	375790	AGRN
146	3483.2	1.91575	0.0664856	13.7737	3.67109e-43	6.13499e-41	ENSG00000140105	7453	WARS1
147	1682.81	2.70501	0.124176	13.7305	6.66566e-43	1.10636e-40	ENSG00000167797	10263	CDK2AP2
148	2662.58	-2.15218	0.0839503	-13.7245	7.23925e-43	1.19345e-40	ENSG00000131473	47	ACLY
149	662.864	-3.80547	0.204524	-13.7171	8.02343e-43	1.31385e-40	ENSG00000105971	858	CAV2
150	369.734	-3.0297	0.148393	-13.6779	1.37574e-42	2.23777e-40	ENSG00000047936	6098	ROS1
151	759.606	2.40229	0.102542	13.6752	1.42834e-42	2.30795e-40	ENSG00000105856	26959	HBP1
152	187.619	-3.28637	0.167723	-13.6319	2.58872e-42	4.15541e-40	ENSG00000123374	1017	CDK2
153	529.291	2.61936	0.118909	13.6186	3.10661e-42	4.95413e-40	ENSG00000258102	643246	MAP1LC3B2
154	300.957	-3.08121	0.153246	-13.5808	5.20431e-42	8.24545e-40	ENSG00000141858	90378	SAMD1
155	3572.84	2.07729	0.079506	13.5498	7.94466e-42	1.25059e-39	ENSG00000102580	5611	DNAJC3
156	3510.08	-2.50702	0.111231	-13.5485	8.08185e-42	1.26403e-39	ENSG00000083857	2195	FAT1
157	189.854	4.96953	0.293664	13.5173	1.23696e-41	1.92232e-39	ENSG00000214866	728597	DCDC2C
158	2181.38	2.29494	0.0959005	13.5029	1.50259e-41	2.32036e-39	ENSG00000229644	NA	NAMPTP1
159	827.262	2.67936	0.124508	13.488	1.84021e-41	2.82385e-39	ENSG00000168209	54541	DDIT4
160	1440.87	-2.53729	0.11401	-13.4838	1.94694e-41	2.96896e-39	ENSG00000101333	5332	PLCB4
161	426.481	-3.00155	0.148459	-13.4822	1.99103e-41	3.01733e-39	ENSG00000113721	5159	PDGFRB
162	661.032	-2.56654	0.116412	-13.4569	2.8054e-41	4.22525e-39	ENSG00000164442	10370	CITED2
163	317.226	2.99104	0.148124	13.4417	3.44272e-41	5.1533e-39	ENSG00000179454	54813	KLHL28
164	6317.39	-2.32693	0.0987551	-13.4366	3.69216e-41	5.49298e-39	ENSG00000177469	284119	CAVIN1
165	240.638	-3.08545	0.155792	-13.3861	7.28708e-41	1.07756e-38	ENSG00000167034	4824	NKX3-1
166	378.736	-3.064	0.154272	-13.379	8.01896e-41	1.17864e-38	ENSG00000074590	9891	NUAK1
167	510.481	-2.54612	0.115925	-13.3372	1.40639e-40	2.05476e-38	ENSG00000113368	4001	LMNB1
168	1237.43	-2.366	0.102426	-13.3364	1.42239e-40	2.06576e-38	ENSG00000146674	3486	IGFBP3
169	483.976	-2.87892	0.141175	-13.3091	2.04881e-40	2.95792e-38	ENSG00000148468	221061	FAM171A1
170	3162.18	1.94779	0.0712328	13.3055	2.15059e-40	3.0866e-38	ENSG00000148358	57720	GPR107
171	461.008	-2.65348	0.124319	-13.3003	2.30668e-40	3.29126e-38	ENSG00000137124	219	ALDH1B1
172	876.374	2.25907	0.0947257	13.2918	2.58418e-40	3.66578e-38	ENSG00000150593	27250	PDCD4
173	431.162	2.68126	0.126509	13.2896	2.65937e-40	3.75063e-38	ENSG00000155275	NA	TRMT44
174	547.717	2.66731	0.125608	13.2739	3.27899e-40	4.59794e-38	ENSG00000178381	90637	ZFAND2A
175	1769.82	2.17486	0.0887066	13.2443	4.86645e-40	6.78495e-38	ENSG00000179918	22928	SEPHS2
176	340.942	-2.70822	0.129016	-13.2404	5.1288e-40	7.11009e-38	ENSG00000187210	2650	GCNT1
177	687.548	-2.46599	0.110743	-13.2377	5.31332e-40	7.32428e-38	ENSG00000249992	25907	TMEM158
178	1803.18	2.15842	0.0876246	13.2203	6.69925e-40	9.18286e-38	ENSG00000083520	22894	DIS3
179	211.965	-3.17266	0.164362	-13.2188	6.83892e-40	9.32194e-38	ENSG00000136492	83990	BRIP1
180	137.922	-4.05717	0.231662	-13.1967	9.16845e-40	1.24278e-37	ENSG00000144476	57007	ACKR3
181	571.969	-2.69015	0.128079	-13.1961	9.24146e-40	1.24576e-37	ENSG00000152465	9397	NMT2
182	812.167	-2.32366	0.10042	-13.1813	1.12482e-39	1.50794e-37	ENSG00000070404	NA	FSTL3
183	197.222	-3.10817	0.160128	-13.1656	1.38438e-39	1.84576e-37	ENSG00000180801	79642	ARSJ
184	408.362	-2.8086	0.137608	-13.1432	1.863e-39	2.4704e-37	ENSG00000119969	3070	HELLS
185	740.645	2.34961	0.102881	13.1183	2.58796e-39	3.41318e-37	ENSG00000112343	10475	TRIM38
186	10288.6	1.76993	0.0587256	13.1107	2.86097e-39	3.75294e-37	ENSG00000113013	3313	HSPA9
187	1476.05	2.04761	0.079927	13.107	3.00057e-39	3.91502e-37	ENSG00000170581	6773	STAT2
188	475.746	-2.57786	0.120802	-13.0615	5.46069e-39	7.08699e-37	ENSG00000104884	2068	ERCC2
189	241.932	-2.81927	0.139461	-13.045	6.78404e-39	8.75787e-37	ENSG00000167693	64359	NXN
190	1586.03	2.37815	0.106002	13.0011	1.2059e-38	1.54856e-36	ENSG00000196505	NA	GDAP2
191	141.013	-3.84194	0.218607	-13.0002	1.21954e-38	1.55788e-36	ENSG00000120693	4093	SMAD9
192	910.286	-2.34256	0.103318	-12.9945	1.31436e-38	1.67027e-36	ENSG00000187098	4286	MITF
193	689.528	-2.29159	0.0996505	-12.9612	2.0315e-38	2.56822e-36	ENSG00000132561	4147	MATN2
194	767.698	2.51167	0.116821	12.94	2.67532e-38	3.36469e-36	ENSG00000173465	10534	ZNRD2
195	2410.38	2.10026	0.0851817	12.9166	3.62894e-38	4.54064e-36	ENSG00000094975	51430	SUCO
196	567.475	-2.83212	0.141947	-12.907	4.1075e-38	5.1132e-36	ENSG00000115325	1796	DOK1
197	145.939	-3.63383	0.20411	-12.904	4.27591e-38	5.29583e-36	ENSG00000149596	57158	JPH2
198	310.178	3.5149	0.195273	12.8789	5.91581e-38	7.25334e-36	ENSG00000188760	130612	TMEM198
199	7857.87	1.86436	0.0671146	12.8789	5.91588e-38	7.25334e-36	ENSG00000168374	378	ARF4
200	581.648	-2.5066	0.117155	-12.8599	7.56542e-38	9.22943e-36	ENSG00000287080	8352	H3C3
201	5234.06	-1.74576	0.0580804	-12.8402	9.76069e-38	1.18338e-35	ENSG00000116133	1718	DHCR24
202	118.858	-3.85917	0.222678	-12.8399	9.79728e-38	1.18338e-35	ENSG00000126822	NA	PLEKHG3
203	1333.84	-2.21284	0.0945984	-12.821	1.25146e-37	1.50415e-35	ENSG00000176014	84617	TUBB6
204	295.008	-2.78983	0.139695	-12.8124	1.39755e-37	1.67151e-35	ENSG00000156475	5521	PPP2R2B
205	1226.36	-3.90055	0.226419	-12.8105	1.43145e-37	1.70371e-35	ENSG00000164465	285761	DCBLD1
206	677.805	2.39644	0.109012	12.81	1.44165e-37	1.70752e-35	ENSG00000126947	51309	ARMCX1
207	665.515	2.54872	0.121014	12.7979	1.68527e-37	1.98642e-35	ENSG00000125459	55154	MSTO1
208	1961.41	-3.80482	0.220515	-12.7194	4.61366e-37	5.41195e-35	ENSG00000157168	3084	NRG1
209	537.114	2.74702	0.137519	12.7038	5.63039e-37	6.57301e-35	ENSG00000215154	652276
210	327.169	-3.11661	0.166658	-12.7003	5.88747e-37	6.8404e-35	ENSG00000074410	771	CA12
211	653.292	2.39751	0.110248	12.6761	8.02295e-37	9.27734e-35	ENSG00000224271	NA
212	95.3438	-4.52919	0.278969	-12.6508	1.1069e-36	1.27392e-34	ENSG00000156466	NA	GDF6
213	1416.3	-4.51767	0.278451	-12.633	1.3886e-36	1.59063e-34	ENSG00000145632	10769	PLK2
214	987.324	-2.4127	0.111894	-12.6253	1.53097e-36	1.74552e-34	ENSG00000181467	5912	RAP2B
215	629.675	2.57563	0.125024	12.6026	2.04192e-36	2.31724e-34	ENSG00000125629	51141	INSIG2
216	4518.98	2.15095	0.0917663	12.5422	4.38756e-36	4.95612e-34	ENSG00000154305	375056	MIA3
217	218.36	-2.94922	0.155488	-12.5361	4.73626e-36	5.30092e-34	ENSG00000121753	576	ADGRB2
218	246.822	-3.14159	0.170833	-12.5362	4.73286e-36	5.30092e-34	ENSG00000204131	340527	NHSL2
219	892.092	-3.38806	0.190573	-12.531	5.05288e-36	5.62946e-34	ENSG00000171435	283455	KSR2
220	259.186	-2.96921	0.157281	-12.5204	5.77648e-36	6.40638e-34	ENSG00000043143	23338	JADE2
221	890.042	-2.40577	0.112302	-12.5178	5.96667e-36	6.58736e-34	ENSG00000183087	2621	GAS6
222	1574.86	-2.09685	0.0876325	-12.5164	6.06931e-36	6.64059e-34	ENSG00000153904	23576	DDAH1
223	204.275	4.46111	0.276522	12.5166	6.05883e-36	6.64059e-34	ENSG00000206077	653082	ZDHHC11B
224	1187.08	2.25045	0.100047	12.4986	7.59705e-36	8.27502e-34	ENSG00000081307	79876	UBA5
225	366.692	-2.97946	0.158899	-12.4573	1.27602e-35	1.38372e-33	ENSG00000185340	10634	GAS2L1
226	1924.57	2.10897	0.0890903	12.4477	1.43984e-35	1.55445e-33	ENSG00000281649	100506710	EBLN3P
227	750.77	-2.66799	0.134019	-12.4459	1.47194e-35	1.58211e-33	ENSG00000144583	NA	MARCHF4
228	124.616	-3.63034	0.211614	-12.4299	1.79808e-35	1.92418e-33	ENSG00000164619	168667	BMPER
229	310.134	-5.10653	0.330659	-12.4192	2.05551e-35	2.19007e-33	ENSG00000061337	11178	LZTS1
230	523.237	2.73355	0.139844	12.3963	2.73563e-35	2.90203e-33	ENSG00000122507	27241	BBS9
231	285.087	-4.73152	0.303063	-12.3127	7.74126e-35	8.17658e-33	ENSG00000139292	8549	LGR5
232	979.487	-2.30302	0.105851	-12.31	8.00405e-35	8.4177e-33	ENSG00000142627	1969	EPHA2
233	231.201	3.45374	0.199494	12.2998	9.07887e-35	9.5071e-33	ENSG00000234465	390940	PINLYP
234	222.476	-5.93708	0.401469	-12.2975	9.33978e-35	9.73852e-33	ENSG00000125378	652	BMP4
235	724.915	2.33437	0.108541	12.2937	9.7883e-35	1.01628e-32	ENSG00000162852	163882	CNST
236	249.297	3.25354	0.183346	12.2912	1.00951e-34	1.04368e-32	ENSG00000166046	255394	TCP11L2
237	472.353	-2.66263	0.135597	-12.2615	1.45691e-34	1.49988e-32	ENSG00000272398	100133941	CD24
238	355.483	2.97661	0.161244	12.2585	1.5124e-34	1.55046e-32	ENSG00000106537	27075	TSPAN13
239	976.462	2.26754	0.103413	12.2572	1.53794e-34	1.57005e-32	ENSG00000176142	55254	TMEM39A
240	2863.23	-2.15225	0.094088	-12.2465	1.75325e-34	1.7824e-32	ENSG00000173546	1464	CSPG4
241	1423.04	1.96004	0.0786429	12.2076	2.83007e-34	2.86518e-32	ENSG00000151694	6868	ADAM17
242	752.501	-2.16416	0.0954018	-12.2027	3.0084e-34	3.03314e-32	ENSG00000183963	6525	SMTN
243	1162.37	-2.46568	0.120227	-12.1909	3.47615e-34	3.49031e-32	ENSG00000173559	64859	NABP1
244	196.562	4.62522	0.297715	12.1768	4.13087e-34	4.1307e-32	ENSG00000134548	80763	SPX
245	77.169	-5.58744	0.376773	-12.1756	4.19292e-34	4.17563e-32	ENSG00000249669	NA	CARMN
246	1489.81	2.18054	0.0970587	12.1631	4.88689e-34	4.84696e-32	ENSG00000183696	7378	UPP1
247	691.553	2.52635	0.125502	12.1619	4.95856e-34	4.89813e-32	ENSG00000164615	819	CAMLG
248	1152.75	2.35351	0.111418	12.1481	5.87408e-34	5.76801e-32	ENSG00000176018	116068	LYSMD3
249	299.342	3.15176	0.177131	12.1479	5.88645e-34	5.76801e-32	ENSG00000146409	116843	SLC18B1
250	5658.76	-2.055	0.0868869	-12.1422	6.308e-34	6.15636e-32	ENSG00000148773	4288	MKI67
251	659.828	-2.46903	0.121042	-12.1365	6.76698e-34	6.57799e-32	ENSG00000126705	27245	AHDC1
252	2512.03	-2.47381	0.121467	-12.1334	7.02716e-34	6.79411e-32	ENSG00000158710	8407	TAGLN2
253	771.553	2.25417	0.103367	12.1332	7.045e-34	6.79411e-32	ENSG00000173875	163049	ZNF791
254	142.475	-3.62372	0.21639	-12.1249	7.79257e-34	7.48547e-32	ENSG00000154764	7476	WNT7A
255	2737.19	-3.28764	0.188921	-12.109	9.46874e-34	9.05992e-32	ENSG00000122786	800	CALD1
256	2545.35	-2.37547	0.113706	-12.0967	1.09947e-33	1.04789e-31	ENSG00000151835	26278	SACS
257	1214.88	2.00834	0.0833926	12.0915	1.17119e-33	1.1119e-31	ENSG00000108651	55813	UTP6
258	77.9493	-4.5687	0.295495	-12.077	1.39701e-33	1.32115e-31	ENSG00000273760	NA
259	1017.64	2.06621	0.0883741	12.0647	1.6221e-33	1.5281e-31	ENSG00000119523	NA	ALG2
260	88.2221	-4.18764	0.264266	-12.0622	1.67192e-33	1.56897e-31	ENSG00000269416	104472717	LINC01224
261	961.149	2.16446	0.0965658	12.0587	1.74457e-33	1.63088e-31	ENSG00000070495	23210	JMJD6
262	847.454	-2.59979	0.132814	-12.0454	2.05097e-33	1.90999e-31	ENSG00000104738	NA	MCM4
263	622.071	-2.65478	0.137505	-12.0343	2.34715e-33	2.17749e-31	ENSG00000004399	23129	PLXND1
264	1550.56	-2.04905	0.0872125	-12.0287	2.51137e-33	2.32102e-31	ENSG00000176619	84823	LMNB2
265	480.032	-2.37913	0.114758	-12.0177	2.86836e-33	2.64095e-31	ENSG00000168502	23255	MTCL1
266	2521.09	1.97786	0.0813987	12.0132	3.0276e-33	2.77709e-31	ENSG00000067369	7158	TP53BP1
267	5889.95	1.72296	0.0602399	12.0014	3.49238e-33	3.1914e-31	ENSG00000136628	2058	EPRS1
268	1373.73	2.03861	0.0867456	11.9731	4.9149e-33	4.47457e-31	ENSG00000164934	25879	DCAF13
269	1028.34	-3.92118	0.244178	-11.9634	5.52827e-33	5.01429e-31	ENSG00000013588	9052	GPRC5A
270	2085.21	2.02681	0.0859224	11.9504	6.4597e-33	5.83742e-31	ENSG00000162695	148867	SLC30A7
271	729.68	2.36263	0.114291	11.9225	9.0357e-33	8.13513e-31	ENSG00000172375	9854	C2CD2L
272	2148.44	1.89988	0.0755164	11.9164	9.72455e-33	8.71002e-31	ENSG00000110048	NA	OSBP
273	430.392	-2.36311	0.114391	-11.9162	9.74562e-33	8.71002e-31	ENSG00000186185	146909	KIF18B
274	766.897	2.2808	0.108157	11.842	2.36629e-32	2.10712e-30	ENSG00000141446	114799	ESCO1
275	3598.47	-2.08329	0.0915583	-11.8317	2.67617e-32	2.3744e-30	ENSG00000071127	9948	WDR1
276	455.814	2.70178	0.143846	11.8305	2.71393e-32	2.39918e-30	ENSG00000178607	2081	ERN1
277	401.51	-2.77469	0.15011	-11.8225	2.98508e-32	2.62935e-30	ENSG00000162063	899	CCNF
278	1825.18	1.94267	0.0797919	11.8141	3.30249e-32	2.89847e-30	ENSG00000175224	9776	ATG13
279	170.981	-3.35975	0.199755	-11.8132	3.3352e-32	2.91669e-30	ENSG00000166396	8710	SERPINB7
280	2018.43	-3.9767	0.252322	-11.7972	4.03299e-32	3.51432e-30	ENSG00000136153	4008	LMO7
281	1122.27	1.99149	0.0841002	11.7894	4.42551e-32	3.84263e-30	ENSG00000166685	9382	COG1
282	2775.52	1.94494	0.0803759	11.7566	6.53336e-32	5.65274e-30	ENSG00000129292	51105	PHF20L1
283	442.049	-2.46164	0.124609	-11.7298	8.96971e-32	7.73329e-30	ENSG00000154864	63895	PIEZO2
284	518.811	2.45588	0.124314	11.7114	1.11481e-31	9.57758e-30	ENSG00000197779	347344	ZNF81
285	739.911	-2.28062	0.10937	-11.7091	1.14513e-31	9.80354e-30	ENSG00000143153	481	ATP1B1
286	5319.12	-1.84239	0.0719937	-11.7008	1.26197e-31	1.0766e-29	ENSG00000169710	2194	FASN
287	163.211	-3.29198	0.195919	-11.6986	1.29535e-31	1.1006e-29	ENSG00000145287	51316	PLAC8
288	254.237	3.10701	0.180112	11.6984	1.29912e-31	1.1006e-29	ENSG00000187266	2057	EPOR
289	2148.04	1.83586	0.0714953	11.6911	1.41466e-31	1.19434e-29	ENSG00000013375	5238	PGM3
290	814.761	-2.14851	0.0982418	-11.6906	1.42386e-31	1.19796e-29	ENSG00000128245	NA	YWHAH
291	310.857	-2.72233	0.147426	-11.6827	1.56225e-31	1.30987e-29	ENSG00000102781	84056	KATNAL1
292	514.08	-3.85303	0.244217	-11.6824	1.56827e-31	1.31041e-29	ENSG00000276043	29128	UHRF1
293	3605.41	1.92125	0.0788807	11.679	1.63242e-31	1.35937e-29	ENSG00000113615	10802	SEC24A
294	2176.19	1.87533	0.0750134	11.669	1.83545e-31	1.52324e-29	ENSG00000088205	NA	DDX18
295	1616.31	2.15946	0.0993808	11.6668	1.88302e-31	1.55742e-29	ENSG00000154832	30827	CXXC1
296	233.656	4.27473	0.280813	11.6616	2.00234e-31	1.65051e-29	ENSG00000130477	23025	UNC13A
297	182.506	3.80503	0.240699	11.6537	2.19718e-31	1.80501e-29	ENSG00000237596	NA
298	700.94	2.10459	0.0948337	11.6476	2.35897e-31	1.93142e-29	ENSG00000081177	55218	EXD2
299	647.515	2.16634	0.1005	11.6053	3.87128e-31	3.15904e-29	ENSG00000205629	51451	LCMT1
300	684.952	-3.60303	0.224389	-11.6005	4.09488e-31	3.33036e-29	ENSG00000140937	1009	CDH11
301	74.4059	-4.6254	0.312594	-11.5978	4.22871e-31	3.42779e-29	ENSG00000144354	83879	CDCA7
302	1607.91	-2.15477	0.0996009	-11.5939	4.4237e-31	3.57397e-29	ENSG00000117519	1266	CNN3
303	658.866	-2.40859	0.121756	-11.569	5.91827e-31	4.76567e-29	ENSG00000171055	9637	FEZ2
304	862.238	2.06043	0.0917851	11.5534	7.09881e-31	5.6975e-29	ENSG00000070540	55062	WIPI1
305	239.112	-2.89323	0.163877	-11.5527	7.15023e-31	5.71995e-29	ENSG00000274997	85235	H2AC12
306	252.946	-2.91379	0.165936	-11.5333	8.9651e-31	7.14835e-29	ENSG00000184557	9021	SOCS3
307	1794.06	-1.97683	0.0847758	-11.5225	1.01652e-30	8.07881e-29	ENSG00000141526	9123	SLC16A3
308	634.231	-2.17428	0.102008	-11.5117	1.1516e-30	9.1227e-29	ENSG00000171793	1503	CTPS1
309	98.9207	-3.61991	0.227756	-11.5032	1.2718e-30	1.00422e-28	ENSG00000130176	1264	CNN1
310	593.846	-2.58871	0.138238	-11.4926	1.43761e-30	1.13149e-28	ENSG00000112297	202	CRYBG1
311	839.895	2.18186	0.102924	11.4829	1.60794e-30	1.26148e-28	ENSG00000100647	NA	SUSD6
312	1144.63	2.05602	0.092051	11.4722	1.82044e-30	1.42362e-28	ENSG00000135842	116496	NIBAN1
313	2851.78	1.80894	0.0705177	11.4715	1.83483e-30	1.43029e-28	ENSG00000111371	81539	SLC38A1
314	684.011	-2.43908	0.125595	-11.4581	2.14281e-30	1.66504e-28	ENSG00000127946	3092	HIP1
315	1818.38	1.96537	0.0843071	11.4506	2.33469e-30	1.80838e-28	ENSG00000136811	4957	ODF2
316	760.602	2.13134	0.098867	11.4431	2.54669e-30	1.96635e-28	ENSG00000187792	NA	ZNF70
317	1417.53	-3.22633	0.195192	-11.4058	3.9101e-30	3.00954e-28	ENSG00000171992	11346	SYNPO
318	734.972	2.30489	0.114517	11.3947	4.44326e-30	3.40915e-28	ENSG00000143751	NA	SDE2
319	863.308	-2.26994	0.111473	-11.3923	4.56706e-30	3.49316e-28	ENSG00000145386	890	CCNA2
320	64.4332	-4.87504	0.340397	-11.3839	5.03116e-30	3.8361e-28	ENSG00000211448	1734	DIO2
321	871.244	2.1901	0.104685	11.3684	6.01071e-30	4.5687e-28	ENSG00000231074	414777	HCG18
322	168.95	-2.78476	0.157049	-11.3644	6.29106e-30	4.76695e-28	ENSG00000092470	79968	WDR76
323	206.347	3.05423	0.180891	11.3562	6.91096e-30	5.22045e-28	ENSG00000165521	161436	EML5
324	397.768	-4.6234	0.319441	-11.343	8.03858e-30	6.0535e-28	ENSG00000137834	4091	SMAD6
325	215.466	-4.75769	0.331381	-11.3395	8.36238e-30	6.27796e-28	ENSG00000205213	55366	LGR4
326	923.514	2.09235	0.0963859	11.3331	8.99724e-30	6.73386e-28	ENSG00000130703	9885	OSBPL2
327	705.826	2.21562	0.107299	11.3294	9.38822e-30	7.00499e-28	ENSG00000123395	60673	ATG101
328	753.706	-4.93444	0.347316	-11.3281	9.52108e-30	7.08246e-28	ENSG00000092969	7042	TGFB2
329	254.713	-2.8575	0.163984	-11.3273	9.60675e-30	7.12447e-28	ENSG00000101447	81610	FAM83D
330	145.647	-2.94503	0.171766	-11.3237	1.00124e-29	7.40283e-28	ENSG00000122707	8434	RECK
331	316.195	-2.59647	0.14105	-11.3185	1.06239e-29	7.83118e-28	ENSG00000170312	983	CDK1
332	1152.56	2.01065	0.0893116	11.316	1.09385e-29	8.0388e-28	ENSG00000117475	8548	BLZF1
333	879.466	2.0061	0.0889948	11.3052	1.23702e-29	9.06365e-28	ENSG00000136935	2800	GOLGA1
334	30370.3	-2.88912	0.167133	-11.3031	1.26696e-29	9.25526e-28	ENSG00000124942	79026	AHNAK
335	66.658	-5.13232	0.365768	-11.2976	1.34785e-29	9.81681e-28	ENSG00000106003	3955	LFNG
336	117.828	-3.5127	0.222414	-11.2974	1.35194e-29	9.81725e-28	ENSG00000163083	NA	INHBB
337	414.004	-2.53683	0.136206	-11.2831	1.58955e-29	1.15084e-27	ENSG00000136720	9394	HS6ST1
338	162.521	-2.99513	0.176836	-11.2824	1.60356e-29	1.15755e-27	ENSG00000065328	55388	MCM10
339	197.614	4.00747	0.266615	11.2802	1.64389e-29	1.18316e-27	ENSG00000092929	201294	UNC13D
340	897.278	2.07562	0.095359	11.2797	1.65236e-29	1.18576e-27	ENSG00000143479	8444	DYRK3
341	474.212	2.54373	0.136865	11.2792	1.66222e-29	1.18934e-27	ENSG00000163877	NA	SNIP1
342	1549.4	2.06373	0.094464	11.2607	2.05071e-29	1.46302e-27	ENSG00000101654	8731	RNMT
343	409.907	2.68761	0.150098	11.2434	2.49642e-29	1.77581e-27	ENSG00000150977	196383	RILPL2
344	1764.2	-2.34953	0.120117	-11.2352	2.73945e-29	1.94302e-27	ENSG00000169213	5865	RAB3B
345	2914.14	-2.09473	0.0975274	-11.2248	3.08042e-29	2.17853e-27	ENSG00000011426	54443	ANLN
346	176.368	3.66061	0.237307	11.2117	3.57291e-29	2.51952e-27	ENSG00000119636	NA	BBOF1
347	935.824	2.04672	0.0933647	11.2111	3.59563e-29	2.52823e-27	ENSG00000136152	NA	COG3
348	213.963	-2.91476	0.171315	-11.1768	5.29439e-29	3.71201e-27	ENSG00000013619	10046	MAMLD1
349	69.9615	-4.19972	0.286711	-11.1601	6.39214e-29	4.46882e-27	ENSG00000131914	79727	LIN28A
350	793.88	-2.2192	0.109285	-11.1562	6.68113e-29	4.65751e-27	ENSG00000117632	3925	STMN1
351	2555.63	-1.86538	0.0776122	-11.1501	7.15147e-29	4.97119e-27	ENSG00000167553	84790	TUBA1C
352	978.335	2.04881	0.0942363	11.1296	9.003e-29	6.24046e-27	ENSG00000167112	26995	TRUB2
353	777.97	2.17591	0.105679	11.1272	9.25335e-29	6.39582e-27	ENSG00000165392	7486	WRN
354	450.079	2.36185	0.122527	11.1147	1.06439e-28	7.33615e-27	ENSG00000175764	158135	TTLL11
355	501.389	2.37346	0.123707	11.1025	1.21948e-28	8.38142e-27	ENSG00000166562	90701	SEC11C
356	1159.39	-2.29481	0.116663	-11.0987	1.27235e-28	8.72022e-27	ENSG00000188486	3014	H2AX
357	10737.2	-2.80947	0.163061	-11.0969	1.29875e-28	8.87628e-27	ENSG00000128510	NA	CPA4
358	1944.59	-2.29841	0.117166	-11.0818	1.53678e-28	1.04737e-26	ENSG00000164292	22836	RHOBTB3
359	471.673	-2.31148	0.118351	-11.0813	1.54618e-28	1.05084e-26	ENSG00000155760	8324	FZD7
360	826.348	2.06545	0.0962006	11.0753	1.65353e-28	1.12068e-26	ENSG00000197780	6884	TAF13
361	941.012	-3.5622	0.231834	-11.0519	2.14687e-28	1.45101e-26	ENSG00000183287	147372	CCBE1
362	3936.47	-3.73658	0.247636	-11.0508	2.17306e-28	1.46465e-26	ENSG00000105974	857	CAV1
363	5247.45	1.97374	0.0883987	11.0154	3.22263e-28	2.16608e-26	ENSG00000071537	6400	SEL1L
364	855.645	2.11982	0.101678	11.0134	3.29298e-28	2.20729e-26	ENSG00000146085	4594	MMUT
365	374.753	2.48047	0.13482	10.9811	4.71128e-28	3.14933e-26	ENSG00000170689	3219	HOXB9
366	531.571	2.38214	0.125955	10.9733	5.1378e-28	3.42506e-26	ENSG00000162910	128308	MRPL55
367	223.526	-2.89864	0.173073	-10.9701	5.31874e-28	3.53602e-26	ENSG00000125726	970	CD70
368	2731.44	1.7259	0.0662097	10.9636	5.71915e-28	3.79189e-26	ENSG00000059573	5832	ALDH18A1
369	4135.09	-3.67173	0.243796	-10.9589	6.02421e-28	3.98333e-26	ENSG00000140416	7168	TPM1
370	750.389	-1.9985	0.091218	-10.9463	6.92048e-28	4.56359e-26	ENSG00000177084	5426	POLE
371	1260.19	-2.05882	0.0968167	-10.9363	7.72515e-28	5.08048e-26	ENSG00000100503	51199	NIN
372	377.848	-2.41834	0.129979	-10.9121	1.00908e-27	6.61841e-26	ENSG00000170442	3892	KRT86
373	448.916	-2.41663	0.130127	-10.8865	1.33661e-27	8.74315e-26	ENSG00000149218	NA	ENDOD1
374	292.819	2.93454	0.177724	10.8851	1.35787e-27	8.85847e-26	ENSG00000168038	54986	ULK4
375	179.116	-2.72594	0.158725	-10.8738	1.53716e-27	1.00014e-25	ENSG00000167081	5090	PBX3
376	1053.87	2.15299	0.106047	10.8725	1.55925e-27	1.01181e-25	ENSG00000119844	54812	AFTPH
377	200.97	3.47025	0.227266	10.8694	1.61253e-27	1.04361e-25	ENSG00000260852	283932	FBXL19-AS1
378	101.595	-3.22771	0.20496	-10.869	1.6196e-27	1.04542e-25	ENSG00000156381	122416	ANKRD9
379	2931	-1.96712	0.0891558	-10.8475	2.04924e-27	1.31925e-25	ENSG00000186575	4771	NF2
380	108.194	-3.39946	0.221771	-10.8195	2.7816e-27	1.78601e-25	ENSG00000184992	140707	BRI3BP
381	254.112	2.90379	0.176096	10.8111	3.04912e-27	1.95264e-25	ENSG00000251369	162972	ZNF550
382	301.394	-2.65457	0.153122	-10.8056	3.23976e-27	2.06929e-25	ENSG00000145431	56034	PDGFC
383	493.234	-2.31714	0.121929	-10.8025	3.34927e-27	2.13365e-25	ENSG00000149591	6876	TAGLN
384	1450.04	-2.89635	0.175594	-10.7996	3.45587e-27	2.19582e-25	ENSG00000143878	388	RHOB
385	784.796	-3.67055	0.24739	-10.7949	3.63909e-27	2.30624e-25	ENSG00000169047	3667	IRS1
386	1127.3	-2.97777	0.183321	-10.7885	3.89945e-27	2.46484e-25	ENSG00000197747	6281	S100A10
387	164.094	-5.39547	0.40761	-10.7835	4.11905e-27	2.59692e-25	ENSG00000189057	374393	FAM111B
388	834.453	-2.24294	0.115267	-10.7832	4.1327e-27	2.59881e-25	ENSG00000090530	55214	P3H2
389	137.127	-3.445	0.226807	-10.7801	4.27483e-27	2.68127e-25	ENSG00000079215	6507	SLC1A3
390	466.962	-2.2086	0.112155	-10.7762	4.46052e-27	2.79057e-25	ENSG00000135476	9700	ESPL1
391	299.674	-2.54101	0.143015	-10.7752	4.50976e-27	2.81416e-25	ENSG00000253276	168455	CCDC71L
392	1180.37	-2.07333	0.0996415	-10.7719	4.67276e-27	2.90844e-25	ENSG00000103489	64131	XYLT1
393	610.707	2.39717	0.12993	10.7533	5.71941e-27	3.55084e-25	ENSG00000114395	11068	CYB561D2
394	155.745	-3.14806	0.199808	-10.7506	5.8858e-27	3.64486e-25	ENSG00000162614	91624	NEXN
395	919.241	-2.19697	0.111465	-10.7385	6.71394e-27	4.14717e-25	ENSG00000143815	3930	LBR
396	4102.54	1.70039	0.0652519	10.7337	7.07302e-27	4.35795e-25	ENSG00000150961	9871	SEC24D
397	1135.03	-2.09304	0.101848	-10.7321	7.19473e-27	4.42177e-25	ENSG00000101224	994	CDC25B
398	110.09	-3.64551	0.246916	-10.7142	8.72931e-27	5.35142e-25	ENSG00000126016	NA	AMOT
399	63.1134	-4.27469	0.305758	-10.7101	9.13033e-27	5.58323e-25	ENSG00000142910	64129	TINAGL1
400	305.235	-5.3132	0.403424	-10.6915	1.11565e-26	6.80517e-25	ENSG00000135074	8728	ADAM19
401	102.405	-3.38114	0.223018	-10.6769	1.3061e-26	7.94701e-25	ENSG00000177706	56975	FAM20C
402	8480.65	-2.19365	0.111801	-10.6765	1.31114e-26	7.95786e-25	ENSG00000130635	1289	COL5A1
403	376.017	-2.35582	0.127034	-10.6729	1.36294e-26	8.25169e-25	ENSG00000169991	126917	IFFO2
404	317.505	-2.33127	0.125107	-10.6411	1.91922e-26	1.15909e-24	ENSG00000234664	NA	HMGN2P5
405	641.897	2.12481	0.105863	10.6252	2.27617e-26	1.37127e-24	ENSG00000213523	10011	SRA1
406	1807.8	-2.21769	0.114856	-10.6019	2.91861e-26	1.75397e-24	ENSG00000105810	1021	CDK6
407	384.204	-2.43215	0.135093	-10.6012	2.94122e-26	1.76321e-24	ENSG00000127124	59269	HIVEP3
408	597.863	2.27199	0.120302	10.5733	3.96148e-26	2.36902e-24	ENSG00000168701	29100	TMEM208
409	16201.6	-2.87592	0.177591	-10.5631	4.41715e-26	2.63506e-24	ENSG00000106366	5054	SERPINE1
410	375.029	-2.28809	0.122215	-10.5395	5.67917e-26	3.37409e-24	ENSG00000123080	1031	CDKN2C
411	2566.61	1.83528	0.0792526	10.5394	5.68364e-26	3.37409e-24	ENSG00000167110	2801	GOLGA2
412	56.6908	-4.97816	0.377592	-10.5356	5.92104e-26	3.50649e-24	ENSG00000276850	NA
413	144.801	-2.89225	0.179726	-10.5285	6.38404e-26	3.77153e-24	ENSG00000157542	NA	KCNJ6
414	365.059	2.74012	0.16529	10.5277	6.43889e-26	3.79475e-24	ENSG00000160469	84446	BRSK1
415	1265.96	-1.94607	0.0898994	-10.5237	6.71857e-26	3.95003e-24	ENSG00000198830	3151	HMGN2
416	594.912	-5.70172	0.447217	-10.5133	7.50327e-26	4.40078e-24	ENSG00000122641	3624	INHBA
417	325.846	-4.42346	0.326012	-10.501	8.5463e-26	5.00051e-24	ENSG00000273703	8342	H2BC14
418	173.597	-2.88572	0.179795	-10.4882	9.79261e-26	5.71603e-24	ENSG00000265190	653145	ANXA8
419	4110.62	1.83282	0.0794424	10.4833	1.03131e-25	6.00544e-24	ENSG00000196365	9361	LONP1
420	66.9526	-4.00909	0.2875	-10.4664	1.23241e-25	7.15945e-24	ENSG00000113578	2246	FGF1
421	233.857	-2.82238	0.174162	-10.4637	1.26777e-25	7.34736e-24	ENSG00000140557	8128	ST8SIA2
422	100.443	-3.43497	0.232746	-10.4619	1.29223e-25	7.47138e-24	ENSG00000169994	4648	MYO7B
423	956.175	-2.2998	0.124282	-10.4585	1.33928e-25	7.72509e-24	ENSG00000175602	11007	CCDC85B
424	384.159	-2.40879	0.134758	-10.4542	1.40156e-25	8.06525e-24	ENSG00000090924	64857	PLEKHG2
425	470.347	2.3089	0.125296	10.4464	1.52151e-25	8.7349e-24	ENSG00000145362	287	ANK2
426	1430.14	-1.92492	0.0885636	-10.4435	1.5685e-25	8.98352e-24	ENSG00000107438	9124	PDLIM1
427	591.54	-3.79495	0.267964	-10.4303	1.80276e-25	1.03011e-23	ENSG00000111186	81029	WNT5B
428	1479.31	1.95547	0.0917425	10.4147	2.12438e-25	1.21104e-23	ENSG00000164597	10466	COG5
429	123.438	-3.06602	0.198624	-10.4017	2.43599e-25	1.38545e-23	ENSG00000147862	4781	NFIB
430	370.272	-2.38086	0.132791	-10.3988	2.51053e-25	1.42452e-23	ENSG00000166483	7465	WEE1
431	856.896	2.0117	0.0973464	10.3927	2.67543e-25	1.51457e-23	ENSG00000006194	NA	ZNF263
432	660.935	-3.34119	0.225533	-10.3807	3.0354e-25	1.71437e-23	ENSG00000185551	7026	NR2F2
433	489.937	2.25264	0.120679	10.3799	3.06074e-25	1.72469e-23	ENSG00000154814	92106	OXNAD1
434	237.214	2.95102	0.188173	10.3682	3.45946e-25	1.94487e-23	ENSG00000164463	153222	CREBRF
435	683.577	-3.51738	0.242819	-10.3673	3.49247e-25	1.95891e-23	ENSG00000197256	25959	KANK2
436	949.847	4.28335	0.317157	10.3524	4.07963e-25	2.283e-23	ENSG00000250746	NA
437	1081.58	1.99329	0.0959503	10.3522	4.09172e-25	2.28453e-23	ENSG00000083937	25978	CHMP2B
438	307.784	2.77321	0.171424	10.344	4.4572e-25	2.48291e-23	ENSG00000164953	91147	TMEM67
439	164.145	3.71222	0.262248	10.3422	4.54017e-25	2.52336e-23	ENSG00000188266	123688	HYKK
440	432.3	2.26503	0.122357	10.3388	4.70253e-25	2.60766e-23	ENSG00000154781	51244	CCDC174
441	150.307	-2.69968	0.1645	-10.3324	5.03014e-25	2.783e-23	ENSG00000074047	2736	GLI2
442	568.61	-2.06469	0.1031	-10.3267	5.33503e-25	2.94501e-23	ENSG00000138193	51196	PLCE1
443	760.754	-3.69514	0.260998	-10.3263	5.3598e-25	2.952e-23	ENSG00000138623	8482	SEMA7A
444	488.616	-2.40514	0.136237	-10.314	6.09406e-25	3.34885e-23	ENSG00000169499	59339	PLEKHA2
445	349.622	-2.30161	0.126285	-10.307	6.55302e-25	3.59297e-23	ENSG00000072195	10290	SPEG
446	443.467	-2.33984	0.130113	-10.2974	7.23554e-25	3.9583e-23	ENSG00000111077	23371	TNS2
447	101.351	-3.39127	0.232226	-10.2972	7.25773e-25	3.96155e-23	ENSG00000122420	5737	PTGFR
448	60.5225	-5.09538	0.398129	-10.2866	8.10165e-25	4.41233e-23	ENSG00000173894	84733	CBX2
449	280.801	2.59405	0.155047	10.2811	8.57557e-25	4.66003e-23	ENSG00000132639	6616	SNAP25
450	2360.52	1.97672	0.0951375	10.2664	9.98623e-25	5.41454e-23	ENSG00000176994	NA	SMCR8
451	1747.66	1.86582	0.0844778	10.2491	1.19414e-24	6.46025e-23	ENSG00000204351	6499	SKIV2L
452	68.959	-3.76319	0.269658	-10.247	1.2206e-24	6.58882e-23	ENSG00000183454	2903	GRIN2A
453	184.16	-2.5213	0.148472	-10.2463	1.22903e-24	6.61967e-23	ENSG00000105011	55723	ASF1B
454	339.309	-2.27183	0.12418	-10.2419	1.28749e-24	6.91925e-23	ENSG00000140848	221184	CPNE2
455	613.347	2.32467	0.129395	10.2374	1.34828e-24	7.23003e-23	ENSG00000105321	26093	CCDC9
456	386.928	2.28515	0.12561	10.2313	1.43547e-24	7.68072e-23	ENSG00000198466	84914	ZNF587
457	447.357	2.31909	0.129019	10.224	1.54893e-24	8.26964e-23	ENSG00000165195	5277	PIGA
458	4529.82	1.73123	0.0715241	10.2236	1.55516e-24	8.28481e-23	ENSG00000198380	2673	GFPT1
459	1118.12	-4.18147	0.31168	-10.2075	1.83544e-24	9.75663e-23	ENSG00000168685	3575	IL7R
460	1351	1.91644	0.0898021	10.2051	1.88122e-24	9.97826e-23	ENSG00000135655	9958	USP15
461	2139.06	-2.06997	0.104904	-10.1995	1.99259e-24	1.05461e-22	ENSG00000159335	5763	PTMS
462	148.159	3.36034	0.231994	10.1742	2.58616e-24	1.3658e-22	ENSG00000230021	NA
463	276.084	2.64609	0.161798	10.1737	2.59716e-24	1.36864e-22	ENSG00000113108	10307	APBB3
464	557.138	-5.10153	0.40341	-10.1672	2.77895e-24	1.46129e-22	ENSG00000166897	NA	ELFN2
465	805.825	-2.20467	0.118754	-10.1443	3.5121e-24	1.84283e-22	ENSG00000225614	84627	ZNF469
466	2331.9	-4.21909	0.317344	-10.1438	3.52935e-24	1.84791e-22	ENSG00000157613	90993	CREB3L1
467	59.3503	-4.67329	0.362416	-10.1356	3.84111e-24	2.00684e-22	ENSG00000185924	NA	RTN4RL1
468	168.211	3.0617	0.203487	10.1319	3.98886e-24	2.07958e-22	ENSG00000198814	2710	GK
469	552.677	-2.1177	0.110334	-10.1301	4.06052e-24	2.11147e-22	ENSG00000143195	387597	ILDR2
470	1306.39	1.90533	0.0893717	10.13	4.06734e-24	2.11147e-22	ENSG00000134759	55250	ELP2
471	231.237	-2.53765	0.151847	-10.1263	4.22261e-24	2.18742e-22	ENSG00000198467	7169	TPM2
472	626.746	2.20787	0.119327	10.1223	4.3985e-24	2.27371e-22	ENSG00000163683	201895	SMIM14
473	615.419	2.25958	0.124493	10.1177	4.61203e-24	2.37905e-22	ENSG00000130844	55422	ZNF331
474	522.772	2.07394	0.106204	10.1121	4.88138e-24	2.51267e-22	ENSG00000181982	91050	CCDC149
475	370.244	2.46679	0.145081	10.1102	4.97849e-24	2.55726e-22	ENSG00000169359	9197	SLC33A1
476	1938.53	1.8034	0.079688	10.0818	6.64898e-24	3.40816e-22	ENSG00000061987	23041	MON2
477	124.785	-2.91767	0.19046	-10.0687	7.60119e-24	3.88808e-22	ENSG00000170577	10736	SIX2
478	398.458	-2.26293	0.125445	-10.0676	7.68286e-24	3.92164e-22	ENSG00000135454	2583	B4GALNT1
479	280.668	-2.38117	0.137293	-10.06	8.29973e-24	4.22766e-22	ENSG00000167889	146664	MGAT5B
480	310.675	-2.70518	0.169542	-10.0576	8.50424e-24	4.32281e-22	ENSG00000176692	2303	FOXC2
481	253.883	-2.33508	0.132793	-10.0538	8.83544e-24	4.48183e-22	ENSG00000122952	11130	ZWINT
482	313.424	-2.47541	0.146762	-10.0531	8.89972e-24	4.50507e-22	ENSG00000125520	NA	SLC2A4RG
483	18922.4	1.74825	0.0744579	10.0493	9.24956e-24	4.67247e-22	ENSG00000185624	5034	P4HB
484	820.155	-3.30118	0.229091	-10.0448	9.68139e-24	4.8805e-22	ENSG00000075223	10512	SEMA3C
485	64.5073	-3.87966	0.28685	-10.0389	1.02804e-23	5.17179e-22	ENSG00000187123	130574	LYPD6
486	602.951	2.21788	0.121562	10.0186	1.2634e-23	6.34274e-22	ENSG00000051009	84067	FHIP1B
487	1298.35	-2.0902	0.108867	-10.014	1.32239e-23	6.62523e-22	ENSG00000140443	3480	IGF1R
488	1308.1	-1.98458	0.0983383	-10.0121	1.3481e-23	6.74023e-22	ENSG00000140564	5045	FURIN
489	536.149	2.12173	0.112054	10.0106	1.36985e-23	6.83496e-22	ENSG00000204524	390980	ZNF805
490	122.241	-3.21308	0.221113	-10.0088	1.39429e-23	6.94272e-22	ENSG00000139174	144165	PRICKLE1
491	203.398	-2.63031	0.163112	-9.99505	1.6021e-23	7.96125e-22	ENSG00000164976	57462	MYORG
492	206.51	-2.55529	0.155781	-9.98382	1.79417e-23	8.89757e-22	ENSG00000145604	6502	SKP2
493	319.473	-2.17966	0.118189	-9.98112	1.84371e-23	9.1247e-22	ENSG00000182628	348235	SKA2
494	2780.84	-2.7691	0.177289	-9.97865	1.89023e-23	9.33597e-22	ENSG00000091986	151887	CCDC80
495	376.446	-2.31811	0.132116	-9.9769	1.92382e-23	9.48271e-22	ENSG00000214717	9189	ZBED1
496	227.321	-4.64804	0.365671	-9.9763	1.93557e-23	9.52136e-22	ENSG00000167767	144501	KRT80
497	395.481	2.26043	0.126403	9.97155	2.03029e-23	9.96722e-22	ENSG00000120519	84068	SLC10A7
498	759.931	-2.12755	0.113129	-9.96694	2.12673e-23	1.04197e-21	ENSG00000115355	55704	CCDC88A
499	1857.79	1.86295	0.0866866	9.95484	2.402e-23	1.17448e-21	ENSG00000155304	NA	HSPA13
500	383.033	-7.43527	0.648267	-9.92688	3.18039e-23	1.55197e-21	ENSG00000168874	84913	ATOH8
501	578.049	-2.02089	0.10291	-9.92018	3.4015e-23	1.65655e-21	ENSG00000112658	6722	SRF
502	724.234	2.07924	0.108799	9.91959	3.42145e-23	1.66295e-21	ENSG00000101457	116092	DNTTIP1
503	614.964	2.08403	0.109302	9.91776	3.48498e-23	1.69046e-21	ENSG00000119878	9419	CRIPT
504	593.169	-2.33526	0.134664	-9.91554	3.56318e-23	1.72496e-21	ENSG00000156802	29028	ATAD2
505	515.72	-4.60761	0.36412	-9.90774	3.85245e-23	1.86131e-21	ENSG00000275342	NA	PRAG1
506	248.182	-2.48623	0.150059	-9.90433	3.98629e-23	1.92217e-21	ENSG00000154146	4900	NRGN
507	435.373	-2.07764	0.109113	-9.87643	5.26746e-23	2.53493e-21	ENSG00000101057	4605	MYBL2
508	729.995	-2.00463	0.101724	-9.87597	5.29193e-23	2.54169e-21	ENSG00000170525	5209	PFKFB3
509	159.556	3.03571	0.206225	9.87132	5.54307e-23	2.65708e-21	ENSG00000178146	NA	GK4P
510	102.601	-3.23978	0.227145	-9.86057	6.16956e-23	2.95159e-21	ENSG00000138622	10021	HCN4
511	173.329	-2.56156	0.158406	-9.85796	6.33208e-23	3.02341e-21	ENSG00000203989	727940	RHOXF2B
512	227.246	2.56088	0.158553	9.84458	7.23443e-23	3.44752e-21	ENSG00000088451	23483	TGDS
513	1677.22	2.00274	0.102074	9.82374	8.8984e-23	4.23221e-21	ENSG00000177302	7156	TOP3A
514	9442.84	-1.87336	0.0889242	-9.82137	9.10986e-23	4.32435e-21	ENSG00000150938	51232	CRIM1
515	1206.68	1.8861	0.0902472	9.81854	9.3693e-23	4.43886e-21	ENSG00000183117	64478	CSMD1
516	205.728	-2.63578	0.166628	-9.81698	9.5152e-23	4.49925e-21	ENSG00000145284	79966	SCD5
517	62.0768	-3.84377	0.289913	-9.80905	1.02931e-22	4.85767e-21	ENSG00000127863	55504	TNFRSF19
518	1254.69	-2.01269	0.103473	-9.78706	1.27961e-22	6.02725e-21	ENSG00000214049	NA	UCA1
519	1809.66	1.7996	0.0817074	9.78617	1.29088e-22	6.06863e-21	ENSG00000118873	25782	RAB3GAP2
520	276.856	-4.53445	0.361256	-9.7838	1.32154e-22	6.20081e-21	ENSG00000117152	5999	RGS4
521	1444.16	1.86208	0.088145	9.78028	1.36835e-22	6.40813e-21	ENSG00000108433	9570	GOSR2
522	1049.43	1.87754	0.0897706	9.77536	1.43648e-22	6.71432e-21	ENSG00000158109	127262	TPRG1L
523	665.825	-2.08899	0.111405	-9.77504	1.44099e-22	6.72251e-21	ENSG00000132967	NA	HMGB1P5
524	253.285	-2.42871	0.146317	-9.76451	1.5988e-22	7.44447e-21	ENSG00000110400	5818	NECTIN1
525	127.993	-2.86558	0.191147	-9.75995	1.67235e-22	7.77214e-21	ENSG00000122694	152007	GLIPR2
526	262.796	-2.26248	0.129384	-9.75769	1.7101e-22	7.93244e-21	ENSG00000135821	2752	GLUL
527	181.873	2.87822	0.192509	9.7565	1.73018e-22	8.01037e-21	ENSG00000156050	NA	FAM161B
528	177.396	2.8015	0.184657	9.75593	1.74003e-22	8.04071e-21	ENSG00000136696	27177	IL36B
529	753.863	1.88653	0.0910149	9.7405	2.02564e-22	9.34285e-21	ENSG00000133398	84246	MED10
530	2294.95	-2.15713	0.11886	-9.73525	2.13295e-22	9.81923e-21	ENSG00000130147	23677	SH3BP4
531	772.661	-3.16093	0.222263	-9.7224	2.42006e-22	1.112e-20	ENSG00000150347	84159	ARID5B
532	159.095	-2.85153	0.190637	-9.71233	2.67171e-22	1.22532e-20	ENSG00000143126	NA	CELSR2
533	56.2325	-4.17268	0.32674	-9.71008	2.73115e-22	1.25023e-20	ENSG00000181751	90355	MACIR
534	680.3	2.03874	0.107046	9.70367	2.90834e-22	1.32885e-20	ENSG00000184178	152579	SCFD2
535	2948.03	-1.82852	0.0855539	-9.68424	3.51826e-22	1.60452e-20	ENSG00000070614	3340	NDST1
536	45.4237	-4.70539	0.38267	-9.683	3.56117e-22	1.62106e-20	ENSG00000196155	25894	PLEKHG4
537	1190.33	1.81351	0.0840204	9.68231	3.58514e-22	1.62893e-20	ENSG00000102978	5432	POLR2C
538	346.569	-2.38833	0.143446	-9.67841	3.72447e-22	1.6891e-20	ENSG00000169439	6383	SDC2
539	518.022	2.10353	0.11409	9.67248	3.94693e-22	1.78666e-20	ENSG00000145390	54532	USP53
540	299.244	-2.50778	0.1563	-9.64669	5.07704e-22	2.29398e-20	ENSG00000128849	84952	CGNL1
541	2360.21	-1.78337	0.0812087	-9.64637	5.09274e-22	2.29682e-20	ENSG00000123416	NA	TUBA1B
542	1429.96	1.92175	0.0957298	9.62865	6.05172e-22	2.72428e-20	ENSG00000129315	904	CCNT1
543	1339.78	1.98312	0.102153	9.62392	6.3368e-22	2.84736e-20	ENSG00000122741	79269	DCAF10
544	483.877	-2.10711	0.11505	-9.62285	6.40332e-22	2.87196e-20	ENSG00000119403	26147	PHF19
545	26999.8	-3.59376	0.26961	-9.6204	6.55754e-22	2.93573e-20	ENSG00000137801	7057	THBS1
546	86.0325	-3.21843	0.230639	-9.61859	6.67399e-22	2.98008e-20	ENSG00000125266	1948	EFNB2
547	394.931	-2.22586	0.127448	-9.61848	6.68103e-22	2.98008e-20	ENSG00000180340	2535	FZD2
548	4494.88	-1.79938	0.0831183	-9.61735	6.75489e-22	3.00753e-20	ENSG00000159840	7791	ZYX
549	246.328	-2.36431	0.141923	-9.61305	7.04342e-22	3.13028e-20	ENSG00000164236	651746	ANKRD33B
550	142.169	-2.75701	0.182934	-9.60463	7.64303e-22	3.39059e-20	ENSG00000161888	147841	SPC24
551	87.6747	-3.29815	0.239383	-9.60029	7.97201e-22	3.53011e-20	ENSG00000130702	3911	LAMA5
552	1134.19	1.98155	0.102304	9.59447	8.4347e-22	3.72823e-20	ENSG00000198753	5365	PLXNB3
553	88.9511	-3.49321	0.259953	-9.59102	8.72193e-22	3.84822e-20	ENSG00000100302	23551	RASD2
554	628.343	-2.34593	0.140338	-9.59062	8.75543e-22	3.85602e-20	ENSG00000158321	26053	AUTS2
555	273.397	-2.28215	0.133744	-9.58657	9.10644e-22	4.00339e-20	ENSG00000108219	81619	TSPAN14
556	599.943	1.93831	0.097938	9.58065	9.64321e-22	4.23174e-20	ENSG00000148572	29982	NRBF2
557	115.676	5.09712	0.427823	9.57668	1.00216e-21	4.38987e-20	ENSG00000184949	646851	FAM227A
558	476.074	-2.19099	0.124405	-9.57351	1.03339e-21	4.51856e-20	ENSG00000031081	57514	ARHGAP31
559	1806.44	-3.03819	0.213378	-9.55203	1.27179e-21	5.55108e-20	ENSG00000058668	493	ATP2B4
560	2597.29	-2.12703	0.1181	-9.54296	1.38812e-21	6.03721e-20	ENSG00000205542	NA	TMSB4X
561	399.316	-3.8192	0.295417	-9.54312	1.38596e-21	6.03721e-20	ENSG00000019549	6591	SNAI2
562	171.46	-4.41097	0.357577	-9.53911	1.44063e-21	6.25445e-20	ENSG00000188064	7477	WNT7B
563	232.21	-2.40224	0.147125	-9.53093	1.55878e-21	6.75538e-20	ENSG00000184384	84441	MAML2
564	410.734	-3.44775	0.256859	-9.52954	1.57979e-21	6.83428e-20	ENSG00000170390	166614	DCLK2
565	404.267	2.27796	0.134196	9.52314	1.68027e-21	7.25608e-20	ENSG00000006459	80853	KDM7A
566	4130.85	1.70969	0.0745701	9.51706	1.78142e-21	7.67929e-20	ENSG00000127914	10142	AKAP9
567	464.623	-2.19979	0.126108	-9.514	1.83464e-21	7.89478e-20	ENSG00000142634	79180	EFHD2
568	7269.96	1.77418	0.0813967	9.5112	1.88472e-21	8.09598e-20	ENSG00000161011	8878	SQSTM1
569	122.693	-2.98238	0.20849	-9.50828	1.93836e-21	8.31177e-20	ENSG00000107796	59	ACTA2
570	160.855	2.89066	0.198866	9.50717	1.95914e-21	8.38616e-20	ENSG00000176531	653583	PHLDB3
571	321.995	-2.36607	0.143711	-9.50563	1.98845e-21	8.49672e-20	ENSG00000244509	27350	APOBEC3C
572	861.274	1.81328	0.0856032	9.50056	2.08767e-21	8.9051e-20	ENSG00000188215	NA	DCUN1D3
573	485.16	2.28621	0.135508	9.49173	2.27238e-21	9.67607e-20	ENSG00000203761	NA	MSTO2P
574	1202.43	-4.6531	0.384889	-9.49129	2.28197e-21	9.69995e-20	ENSG00000117318	3399	ID3
575	155.599	-2.73005	0.182311	-9.4896	2.31913e-21	9.84076e-20	ENSG00000101412	1869	E2F1
576	3046.66	-1.95159	0.10032	-9.48552	2.41186e-21	1.02165e-19	ENSG00000065308	9697	TRAM2
577	2806.69	-1.9946	0.104871	-9.4841	2.4449e-21	1.03385e-19	ENSG00000106211	3315	HSPB1
578	1127.52	1.929	0.0979735	9.48217	2.4906e-21	1.05135e-19	ENSG00000125630	84172	POLR1B
579	1293.75	-1.93194	0.0984104	-9.46991	2.80075e-21	1.18023e-19	ENSG00000114554	5361	PLXNA1
580	379.41	2.30427	0.137791	9.46554	2.92054e-21	1.22859e-19	ENSG00000172613	5883	RAD9A
581	7958.89	-1.64333	0.067993	-9.46168	3.03035e-21	1.27259e-19	ENSG00000196230	203068	TUBB
582	112.05	5.75461	0.50261	9.45983	3.08453e-21	1.29312e-19	ENSG00000152463	55301	OLAH
583	65.3413	-3.72893	0.288633	-9.45467	3.24039e-21	1.35613e-19	ENSG00000162073	124222	PAQR4
584	4431.24	-3.23803	0.236848	-9.44922	3.41374e-21	1.42623e-19	ENSG00000150687	11098	PRSS23
585	1914.38	1.89318	0.0945484	9.44684	3.4922e-21	1.45652e-19	ENSG00000141644	4152	MBD1
586	145.704	-2.65785	0.175653	-9.43821	3.79192e-21	1.57882e-19	ENSG00000139880	64403	CDH24
587	148.272	-4.12136	0.330848	-9.43441	3.93188e-21	1.63431e-19	ENSG00000162407	8613	PLPP3
588	158.6	4.74082	0.39664	9.43127	4.05159e-21	1.6812e-19	ENSG00000272405	NA
589	541.822	-3.74319	0.290943	-9.42862	4.15501e-21	1.72119e-19	ENSG00000171617	8507	ENC1
590	162.611	2.70223	0.180601	9.42539	4.28529e-21	1.77215e-19	ENSG00000196611	4312	MMP1
591	322.608	-2.04058	0.110457	-9.42072	4.48006e-21	1.84644e-19	ENSG00000068383	3632	INPP5A
592	1889.52	-2.91128	0.20288	-9.42076	4.47836e-21	1.84644e-19	ENSG00000050405	51474	LIMA1
593	598.431	-1.93979	0.0998043	-9.41635	4.67045e-21	1.92166e-19	ENSG00000076067	5939	RBMS2
594	926.035	1.9399	0.0998791	9.41041	4.94186e-21	2.02991e-19	ENSG00000146833	89122	TRIM4
595	368.737	-3.20517	0.23444	-9.4061	5.14869e-21	2.11131e-19	ENSG00000122870	80114	BICC1
596	551.799	-6.17919	0.550644	-9.4057	5.16845e-21	2.11586e-19	ENSG00000125968	3397	ID1
597	1411.54	1.76107	0.080933	9.40368	5.26883e-21	2.15333e-19	ENSG00000120805	400	ARL1
598	825.673	1.92102	0.0979655	9.40148	5.38023e-21	2.19519e-19	ENSG00000172057	94103	ORMDL3
599	2422.25	-1.96118	0.102272	-9.39828	5.54622e-21	2.25914e-19	ENSG00000131747	7153	TOP2A
600	579.663	2.08197	0.115131	9.39778	5.57271e-21	2.26614e-19	ENSG00000109270	8649	LAMTOR3
601	702.834	-2.03245	0.110042	-9.38239	6.44919e-21	2.6182e-19	ENSG00000168077	51435	SCARA3
602	792.909	-2.12423	0.119828	-9.382	6.47359e-21	2.62374e-19	ENSG00000176788	10409	BASP1
603	58.9373	-4.26967	0.348571	-9.38021	6.5842e-21	2.66414e-19	ENSG00000147041	94122	SYTL5
604	1009.85	1.93816	0.100021	9.37959	6.62329e-21	2.67552e-19	ENSG00000063587	10838	ZNF275
605	418.442	-3.06089	0.219839	-9.37454	6.94801e-21	2.80206e-19	ENSG00000146376	NA	ARHGAP18
606	263.619	-2.64215	0.175296	-9.36784	7.40353e-21	2.98084e-19	ENSG00000213763	NA	ACTBP2
607	619.557	-1.99087	0.105874	-9.35894	8.05416e-21	3.23745e-19	ENSG00000162104	115	ADCY9
608	329.286	-2.18993	0.12722	-9.35327	8.49786e-21	3.41019e-19	ENSG00000185920	5727	PTCH1
609	687.871	2.01258	0.108269	9.35241	8.5672e-21	3.43237e-19	ENSG00000125740	2354	FOSB
610	272.63	-2.28297	0.13726	-9.34701	9.01569e-21	3.60613e-19	ENSG00000102384	2491	CENPI
611	219.544	-2.44104	0.154378	-9.3345	1.01471e-20	4.05204e-19	ENSG00000096060	2289	FKBP5
612	1912.65	-1.75974	0.0814223	-9.33085	1.05025e-20	4.18712e-19	ENSG00000182481	3838	KPNA2
613	201.218	-4.0216	0.324039	-9.3248	1.11193e-20	4.42576e-19	ENSG00000256663	NA
614	83.073	4.71424	0.398889	9.31144	1.26108e-20	5.01123e-19	ENSG00000147614	245972	ATP6V0D2
615	327.627	-2.32721	0.142709	-9.30015	1.40253e-20	5.56429e-19	ENSG00000148120	84909	AOPEP
616	1277.86	-1.90889	0.0977496	-9.29819	1.42857e-20	5.65839e-19	ENSG00000148634	26091	HERC4
617	302.726	-2.51309	0.163061	-9.27924	1.70696e-20	6.75009e-19	ENSG00000111859	4739	NEDD9
618	348.9	-2.16925	0.126398	-9.25054	2.23354e-20	8.81813e-19	ENSG00000176903	9240	PNMA1
619	218.218	2.5223	0.164678	9.24408	2.37264e-20	9.35217e-19	ENSG00000147894	203228	C9orf72
620	479.617	-2.14081	0.123453	-9.24085	2.44557e-20	9.62412e-19	ENSG00000148400	4851	NOTCH1
621	348.291	2.25765	0.136179	9.23525	2.57683e-20	1.01243e-18	ENSG00000081803	93664	CADPS2
622	322.663	-2.33879	0.144977	-9.2345	2.59504e-20	1.01795e-18	ENSG00000144642	27303	RBMS3
623	71.1692	-3.23137	0.24198	-9.22132	2.93466e-20	1.14932e-18	ENSG00000129173	79733	E2F8
624	142.029	-2.71469	0.185989	-9.2193	2.99034e-20	1.16925e-18	ENSG00000266074	57597	BAHCC1
625	580.419	2.04391	0.11331	9.21287	3.17527e-20	1.23958e-18	ENSG00000116752	NA	BCAS2
626	1329.3	1.75037	0.0815058	9.20631	3.3752e-20	1.31552e-18	ENSG00000166170	9529	BAG5
627	646.836	-2.18254	0.1285	-9.20265	3.49221e-20	1.35895e-18	ENSG00000053254	1112	FOXN3
628	504.504	2.09235	0.118711	9.20172	3.52261e-20	1.3686e-18	ENSG00000138433	NA	CIR1
629	1520.59	1.69015	0.0750359	9.19755	3.66212e-20	1.42054e-18	ENSG00000013374	51667	NUB1
630	184.467	2.58514	0.172618	9.18296	4.19382e-20	1.62421e-18	ENSG00000169330	23251	MINAR1
631	385.872	-2.18645	0.129249	-9.1796	4.3268e-20	1.67305e-18	ENSG00000213030	94115	CGB8
632	664.802	1.92177	0.100473	9.17424	4.54777e-20	1.75571e-18	ENSG00000107077	23081	KDM4C
633	120.039	-2.70889	0.186285	-9.17352	4.57805e-20	1.76461e-18	ENSG00000169258	NA	GPRIN1
634	244.116	-2.4886	0.162465	-9.1626	5.06603e-20	1.94962e-18	ENSG00000112759	2030	SLC29A1
635	483.777	-2.16648	0.127443	-9.1529	5.54266e-20	2.12969e-18	ENSG00000157600	84187	TMEM164
636	1380.65	-2.7098	0.187014	-9.1426	6.09688e-20	2.33896e-18	ENSG00000076513	88455	ANKRD13A
637	4391.33	1.65033	0.0711551	9.13955	6.27099e-20	2.40198e-18	ENSG00000196235	6829	SUPT5H
638	216.731	-2.54377	0.168939	-9.13803	6.36027e-20	2.43236e-18	ENSG00000115363	84141	EVA1A
639	162.54	3.03793	0.22313	9.13341	6.63749e-20	2.5344e-18	ENSG00000142765	84958	SYTL1
640	147.363	-2.58727	0.173888	-9.12809	6.97166e-20	2.65784e-18	ENSG00000131153	51659	GINS2
641	788.132	-2.15649	0.126701	-9.12771	6.99609e-20	2.66299e-18	ENSG00000169908	4071	TM4SF1
642	47.5221	-6.137	0.562868	-9.12648	7.07597e-20	2.6892e-18	ENSG00000179300	203430	RTL3
643	1133	1.84447	0.0926217	9.11744	7.69177e-20	2.91868e-18	ENSG00000108587	9527	GOSR1
644	459.321	-2.25732	0.138076	-9.10596	8.55043e-20	3.23947e-18	ENSG00000114315	3280	HES1
645	248.352	2.47897	0.16252	9.10025	9.01275e-20	3.40933e-18	ENSG00000172273	25988	HINFP
646	1987.85	1.65309	0.0718124	9.09436	9.51416e-20	3.58889e-18	ENSG00000182827	64746	ACBD3
647	881.303	1.87408	0.096113	9.09433	9.51682e-20	3.58889e-18	ENSG00000163719	64419	MTMR14
648	430.093	2.26448	0.139122	9.08901	9.99419e-20	3.76309e-18	ENSG00000011132	9546	APBA3
649	290.18	-2.36561	0.150255	-9.08862	1.00303e-19	3.77087e-18	ENSG00000173218	81839	VANGL1
650	685.588	1.92622	0.101965	9.08374	1.04904e-19	3.93776e-18	ENSG00000059804	6515	SLC2A3
651	748.418	-3.88215	0.317348	-9.08198	1.06615e-19	3.99583e-18	ENSG00000149177	5795	PTPRJ
652	7086.05	1.57217	0.0630079	9.08092	1.07662e-19	4.02889e-18	ENSG00000122218	NA	COPA
653	414.989	-2.05335	0.116034	-9.07798	1.10609e-19	4.13283e-18	ENSG00000185215	7127	TNFAIP2
654	293.942	2.39523	0.15381	9.07117	1.17747e-19	4.39285e-18	ENSG00000136169	83852	SETDB2
655	551.997	-3.31559	0.255533	-9.06179	1.28323e-19	4.78006e-18	ENSG00000134363	10468	FST
656	130.102	-2.68683	0.186345	-9.05217	1.40153e-19	5.21279e-18	ENSG00000138376	580	BARD1
657	840.946	1.92961	0.102738	9.04838	1.45099e-19	5.38854e-18	ENSG00000109065	26151	NAT9
658	1639.56	-1.92291	0.102035	-9.04496	1.49714e-19	5.55148e-18	ENSG00000169604	84168	ANTXR1
659	43.4404	-5.12175	0.455887	-9.04116	1.55015e-19	5.73704e-18	ENSG00000124766	6659	SOX4
660	442.16	-3.36951	0.262083	-9.04104	1.55189e-19	5.73704e-18	ENSG00000103196	83716	CRISPLD2
661	5919.71	2.72517	0.190831	9.04031	1.56235e-19	5.76697e-18	ENSG00000168003	6520	SLC3A2
662	898.576	-2.15222	0.127465	-9.03946	1.5745e-19	5.80304e-18	ENSG00000204217	659	BMPR2
663	800.6	-1.99203	0.109748	-9.03914	1.57906e-19	5.81108e-18	ENSG00000172175	10892	MALT1
664	87.253	5.19216	0.463833	9.03809	1.59439e-19	5.85866e-18	ENSG00000214050	157574	FBXO16
665	6747.42	1.60249	0.0666984	9.03313	1.66837e-19	6.12129e-18	ENSG00000144674	2803	GOLGA4
666	153.357	-2.54752	0.171556	-9.02049	1.87243e-19	6.85969e-18	ENSG00000173621	78999	LRFN4
667	668.86	2.14799	0.127302	9.01781	1.91887e-19	7.01927e-18	ENSG00000198300	5178	PEG3
668	100.787	-2.78906	0.198752	-9.00147	2.22714e-19	8.13472e-18	ENSG00000151892	2674	GFRA1
669	93.8018	3.67298	0.297215	8.99342	2.39647e-19	8.74011e-18	ENSG00000166246	146562	DNAAF8
670	712.08	-1.84358	0.0938217	-8.99128	2.44357e-19	8.89862e-18	ENSG00000169992	57555	NLGN2
671	560.765	-2.07714	0.119879	-8.98528	2.5808e-19	9.38435e-18	ENSG00000276368	8331	H2AC14
672	751.28	1.97313	0.108416	8.97586	2.81154e-19	1.02082e-17	ENSG00000108406	79665	DHX40
673	253.304	2.44705	0.161252	8.97386	2.86313e-19	1.038e-17	ENSG00000240024	100505687	LINC00888
674	874.723	2.06597	0.118813	8.97182	2.91658e-19	1.05581e-17	ENSG00000197530	142678	MIB2
675	4040.34	-1.71785	0.0800167	-8.97129	2.93061e-19	1.05932e-17	ENSG00000197694	6709	SPTAN1
676	3683.36	1.6217	0.0693047	8.97059	2.94931e-19	1.0645e-17	ENSG00000128272	468	ATF4
677	318.973	2.16947	0.130382	8.96955	2.97726e-19	1.073e-17	ENSG00000173480	147687	ZNF417
678	4238.85	-3.13787	0.238549	-8.96196	3.18971e-19	1.14787e-17	ENSG00000142871	3491	CCN1
679	174.332	-2.41751	0.158264	-8.95661	3.34819e-19	1.20313e-17	ENSG00000127955	2770	GNAI1
680	2701.45	-2.61669	0.180552	-8.95415	3.42355e-19	1.2284e-17	ENSG00000142798	3339	HSPG2
681	49.017	-3.8263	0.315739	-8.95137	3.51105e-19	1.25794e-17	ENSG00000233695	NA	GAS6-AS1
682	905.857	1.84478	0.0943991	8.94899	3.58764e-19	1.2835e-17	ENSG00000162065	57465	TBC1D24
683	76.5526	-3.03318	0.227203	-8.94875	3.59525e-19	1.28434e-17	ENSG00000183250	84536	LINC01547
684	527.928	2.08036	0.120742	8.94762	3.63222e-19	1.29565e-17	ENSG00000162851	64216	TFB2M
685	58.3451	-3.47332	0.276582	-8.94245	3.80621e-19	1.35573e-17	ENSG00000204176	83849	SYT15
686	857.228	1.90079	0.100748	8.94102	3.85588e-19	1.37142e-17	ENSG00000215041	84461	NEURL4
687	224.779	-2.34712	0.150715	-8.93819	3.95597e-19	1.40497e-17	ENSG00000111885	4121	MAN1A1
688	143.028	-2.92551	0.215556	-8.93272	4.1565e-19	1.47405e-17	ENSG00000074181	4854	NOTCH3
689	1372.71	1.83641	0.0937557	8.92115	4.61455e-19	1.63411e-17	ENSG00000060069	9150	CTDP1
690	48.4498	-3.82833	0.317046	-8.9209	4.62516e-19	1.6355e-17	ENSG00000178882	100533183	RFLNA
691	1644.98	1.66112	0.0741398	8.91728	4.77895e-19	1.68743e-17	ENSG00000052841	55761	TTC17
692	555.658	-1.88303	0.0990644	-8.91372	4.93474e-19	1.73992e-17	ENSG00000140350	8125	ANP32A
693	200.664	2.56617	0.175743	8.91173	5.0242e-19	1.76891e-17	ENSG00000185869	374899	ZNF829
694	398.803	-2.42682	0.160207	-8.90612	5.28497e-19	1.85804e-17	ENSG00000113594	3977	LIFR
695	376.934	-2.30823	0.146942	-8.90306	5.43302e-19	1.90734e-17	ENSG00000177700	NA	POLR2L
696	190.328	-2.34866	0.151559	-8.89861	5.65484e-19	1.98236e-17	ENSG00000112139	266727	MDGA1
697	572.527	-1.95382	0.107194	-8.8981	5.68093e-19	1.98865e-17	ENSG00000183337	54880	BCOR
698	326.563	2.24218	0.139812	8.88464	6.41258e-19	2.24156e-17	ENSG00000173221	2745	GLRX
699	636.314	-3.1991	0.248118	-8.86312	7.7804e-19	2.71579e-17	ENSG00000181104	2149	F2R
700	41.6564	-4.21538	0.362826	-8.86205	7.85569e-19	2.73816e-17	ENSG00000057657	639	PRDM1
701	742.378	2.10475	0.124665	8.86177	7.87574e-19	2.74123e-17	ENSG00000128563	NA	PRKRIP1
702	555.007	-2.882	0.212418	-8.85992	8.00711e-19	2.78298e-17	ENSG00000162722	25893	TRIM58
703	508.935	-2.06105	0.11982	-8.85537	8.34064e-19	2.89478e-17	ENSG00000161714	113026	PLCD3
704	67.4156	-3.24447	0.253569	-8.85151	8.63405e-19	2.99236e-17	ENSG00000004777	115703	ARHGAP33
705	163.941	-2.56894	0.177441	-8.84206	9.39695e-19	3.25215e-17	ENSG00000110080	6484	ST3GAL4
706	779.617	-2.07189	0.121252	-8.84017	9.55738e-19	3.30298e-17	ENSG00000107130	23413	NCS1
707	206.486	-3.72209	0.308222	-8.83158	1.03205e-18	3.56168e-17	ENSG00000163637	166336	PRICKLE2
708	1017.66	-1.91804	0.104044	-8.82356	1.10882e-18	3.8212e-17	ENSG00000170540	23204	ARL6IP1
709	506.962	-1.88264	0.100065	-8.82063	1.13814e-18	3.91669e-17	ENSG00000205476	NA	CCDC85C
710	1345.23	1.88702	0.100585	8.81858	1.1592e-18	3.98355e-17	ENSG00000197976	NA	AKAP17A
711	322.71	-2.30639	0.148173	-8.81664	1.17946e-18	4.04748e-17	ENSG00000189159	51155	JPT1
712	268.372	-2.16325	0.132015	-8.81147	1.2352e-18	4.23282e-17	ENSG00000127564	9088	PKMYT1
713	1596.27	1.83808	0.0952258	8.80095	1.35658e-18	4.64224e-17	ENSG00000120889	8795	TNFRSF10B
714	256.68	-3.66403	0.303063	-8.79034	1.49108e-18	5.09535e-17	ENSG00000150630	7424	VEGFC
715	248.278	2.36361	0.155265	8.78249	1.59895e-18	5.45632e-17	ENSG00000172007	83452	RAB33B
716	1522.27	1.85358	0.0972605	8.77627	1.6898e-18	5.75829e-17	ENSG00000152700	51128	SAR1B
717	210.329	2.4293	0.163199	8.75805	1.98649e-18	6.75989e-17	ENSG00000128165	79924	ADM2
718	1049.37	-2.65776	0.189335	-8.75572	2.02811e-18	6.8919e-17	ENSG00000129680	79649	MAP7D3
719	713.037	1.82302	0.0940368	8.75214	2.09346e-18	7.10409e-17	ENSG00000102401	51566	ARMCX3
720	1522.2	-1.84429	0.0965653	-8.74325	2.26497e-18	7.6754e-17	ENSG00000189403	3146	HMGB1
721	4811.34	1.68538	0.0783973	8.7424	2.28218e-18	7.72302e-17	ENSG00000113739	8614	STC2
722	249.07	-2.32007	0.151007	-8.74178	2.29458e-18	7.75423e-17	ENSG00000078053	273	AMPH
723	841.312	-1.69297	0.079298	-8.73878	2.35647e-18	7.95237e-17	ENSG00000112118	4172	MCM3
724	284.469	-2.21256	0.138789	-8.73672	2.39985e-18	8.08757e-17	ENSG00000176890	7298	TYMS
725	150.195	-2.40859	0.161509	-8.72143	2.74714e-18	9.24517e-17	ENSG00000068001	8692	HYAL2
726	733.816	2.21331	0.139174	8.71793	2.83325e-18	9.52183e-17	ENSG00000128228	23753	SDF2L1
727	88.1267	4.63281	0.41709	8.70989	3.0417e-18	1.02083e-16	ENSG00000145088	55840	EAF2
728	126.969	3.00591	0.230327	8.70898	3.06622e-18	1.02765e-16	ENSG00000220804	NA	LINC01881
729	292.577	-2.07198	0.123112	-8.70736	3.11025e-18	1.04097e-16	ENSG00000261801	100287616	LOXL1-AS1
730	104.661	-4.57254	0.410327	-8.70657	3.13208e-18	1.04684e-16	ENSG00000204767	100131897	INSYN2B
731	555.622	2.07238	0.123212	8.70358	3.21572e-18	1.07333e-16	ENSG00000198799	9860	LRIG2
732	134.557	-2.80644	0.207659	-8.69909	3.3456e-18	1.11515e-16	ENSG00000146122	23500	DAAM2
733	416.789	2.0357	0.119077	8.69779	3.38419e-18	1.12648e-16	ENSG00000027697	3459	IFNGR1
734	568.836	-2.0104	0.116249	-8.69166	3.5719e-18	1.18734e-16	ENSG00000259781	NA	HMGB1P6
735	120.214	3.71252	0.312218	8.68788	3.69256e-18	1.22578e-16	ENSG00000166257	55800	SCN3B
736	68.2052	-3.25159	0.259247	-8.68513	3.78319e-18	1.25416e-16	ENSG00000080573	50509	COL5A3
737	514.212	-2.02808	0.118706	-8.66068	4.68949e-18	1.55249e-16	ENSG00000141429	2589	GALNT1
738	41.1581	-5.02914	0.465381	-8.65772	4.81311e-18	1.59126e-16	ENSG00000105855	3696	ITGB8
739	717.163	1.98981	0.114409	8.65155	5.08051e-18	1.67739e-16	ENSG00000114107	80321	CEP70
740	92.9839	4.16575	0.3664	8.64016	5.61324e-18	1.85078e-16	ENSG00000204815	83538	ODAD4
741	1602.59	1.67196	0.0777803	8.63918	5.66193e-18	1.86431e-16	ENSG00000020129	23154	NCDN
742	2044.1	-1.97875	0.113301	-8.63844	5.69841e-18	1.87379e-16	ENSG00000154380	55740	ENAH
743	115.352	-2.99525	0.230995	-8.63763	5.73925e-18	1.88215e-16	ENSG00000138675	2250	FGF5
744	76.6312	-3.22287	0.257344	-8.63775	5.73332e-18	1.88215e-16	ENSG00000204091	732253	TDRG1
745	2692.22	-2.05083	0.121741	-8.63166	6.04684e-18	1.98036e-16	ENSG00000137962	9411	ARHGAP29
746	1756.45	1.72271	0.0837814	8.62608	6.34886e-18	2.07649e-16	ENSG00000111711	51026	GOLT1B
747	2765.17	1.62022	0.072026	8.61112	7.23524e-18	2.36322e-16	ENSG00000179889	23042	PDXDC1
748	1045.27	1.70984	0.0824564	8.60868	7.39069e-18	2.41077e-16	ENSG00000212719	NA	LINC02693
749	600.149	-1.8188	0.0951789	-8.60274	7.78369e-18	2.53557e-16	ENSG00000086289	54749	EPDR1
750	120.814	-2.94636	0.226395	-8.5972	8.1687e-18	2.65744e-16	ENSG00000120708	7045	TGFBI
751	126.907	2.78449	0.207672	8.59279	8.48821e-18	2.75771e-16	ENSG00000073605	55876	GSDMB
752	247.393	-2.3917	0.162006	-8.59041	8.6663e-18	2.81182e-16	ENSG00000203805	196051	PLPP4
753	522.266	-2.16246	0.135429	-8.58357	9.19754e-18	2.98022e-16	ENSG00000108854	64750	SMURF2
754	42.5202	-4.21288	0.374508	-8.57894	9.5754e-18	3.09854e-16	ENSG00000163362	55765	INAVA
755	36.9556	-4.41301	0.397974	-8.57596	9.82639e-18	3.17555e-16	ENSG00000164161	64399	HHIP
756	1616.14	-2.65362	0.19285	-8.57468	9.9365e-18	3.20689e-16	ENSG00000114270	1294	COL7A1
757	1885.02	-1.66994	0.0782091	-8.56603	1.07118e-17	3.45255e-16	ENSG00000079308	7145	TNS1
758	771.955	1.90609	0.105799	8.56426	1.0877e-17	3.50116e-16	ENSG00000135541	54806	AHI1
759	311.431	-2.03297	0.120627	-8.56339	1.09597e-17	3.52312e-16	ENSG00000172819	5916	RARG
760	37.4247	-5.77798	0.558352	-8.55728	1.15564e-17	3.71007e-16	ENSG00000265763	118738	ZNF488
761	1679.31	1.80464	0.0941222	8.5489	1.2427e-17	3.98431e-16	ENSG00000013275	5704	PSMC4
762	128.679	2.97362	0.231143	8.53852	1.35956e-17	4.35325e-16	ENSG00000154930	84532	ACSS1
763	2107.49	1.79251	0.0928858	8.53205	1.43774e-17	4.59755e-16	ENSG00000116127	7840	ALMS1
764	1313.9	1.72631	0.08514	8.53082	1.45311e-17	4.64063e-16	ENSG00000167977	54442	KCTD5
765	73.4935	-3.03997	0.239276	-8.52558	1.52042e-17	4.84926e-16	ENSG00000160326	11182	SLC2A6
766	346.885	2.18136	0.138639	8.52114	1.57992e-17	5.03244e-16	ENSG00000185418	NA	TARS3
767	80.2675	-6.2993	0.621932	-8.5207	1.58588e-17	5.04484e-16	ENSG00000100065	29775	CARD10
768	194.127	2.6417	0.192694	8.51971	1.59952e-17	5.08161e-16	ENSG00000206530	55779	CFAP44
769	136.09	6.20804	0.612229	8.50668	1.7899e-17	5.67904e-16	ENSG00000130294	547	KIF1A
770	572.886	-1.90885	0.10694	-8.49868	1.91766e-17	6.07648e-16	ENSG00000176871	55884	WSB2
771	715.16	-1.7612	0.0896441	-8.4914	2.04163e-17	6.46093e-16	ENSG00000132780	4678	NASP
772	1656.39	-3.36944	0.279156	-8.48786	2.10469e-17	6.65187e-16	ENSG00000110092	595	CCND1
773	453.255	-1.889	0.104774	-8.48494	2.15832e-17	6.79494e-16	ENSG00000138031	109	ADCY3
774	888.195	-2.13844	0.134169	-8.48505	2.15622e-17	6.79494e-16	ENSG00000110427	25758	KIAA1549L
775	953.545	-2.03813	0.12235	-8.48495	2.15812e-17	6.79494e-16	ENSG00000168461	11031	RAB31
776	213.165	-3.46916	0.291135	-8.48115	2.22984e-17	7.01107e-16	ENSG00000103449	6299	SALL1
777	1425.64	-1.89244	0.105255	-8.47888	2.27369e-17	7.13975e-16	ENSG00000173706	NA	HEG1
778	863.479	1.76878	0.090701	8.47595	2.33174e-17	7.31261e-16	ENSG00000119048	7320	UBE2B
779	531.546	1.92955	0.109712	8.47261	2.39949e-17	7.51542e-16	ENSG00000165516	23588	KLHDC2
780	138.261	-2.46877	0.173498	-8.4656	2.54838e-17	7.97152e-16	ENSG00000159259	8208	CHAF1B
781	1197.07	1.7836	0.0928848	8.4363	3.2754e-17	1.02326e-15	ENSG00000176624	51320	MEX3C
782	194.038	-3.87922	0.341373	-8.43424	3.3336e-17	1.04011e-15	ENSG00000124496	55809	TRERF1
783	777.86	-2.9612	0.232543	-8.43373	3.34818e-17	1.04332e-15	ENSG00000198053	140885	SIRPA
784	180.784	-2.36492	0.162036	-8.42356	3.65204e-17	1.13656e-15	ENSG00000160446	84885	ZDHHC12
785	998.619	-1.96782	0.11493	-8.42098	3.73351e-17	1.16043e-15	ENSG00000147100	NA	SLC16A2
786	2729.05	-1.86432	0.102707	-8.41544	3.91437e-17	1.2151e-15	ENSG00000105329	7040	TGFB1
787	91.4658	-2.75487	0.208569	-8.41385	3.96773e-17	1.2301e-15	ENSG00000169683	201255	LRRC45
788	534.258	1.98934	0.117791	8.3991	4.49929e-17	1.39312e-15	ENSG00000138660	55435	AP1AR
789	1763.82	-1.8388	0.0999094	-8.39562	4.63446e-17	1.43316e-15	ENSG00000160014	808	CALM3
790	1102.33	1.77561	0.0924054	8.39361	4.71454e-17	1.45608e-15	ENSG00000135040	60560	NAA35
791	50.0409	-3.79986	0.333589	-8.39315	4.73287e-17	1.45989e-15	ENSG00000162892	11009	IL24
792	71.8024	-3.10523	0.251002	-8.38729	4.97464e-17	1.53253e-15	ENSG00000204174	5540	NPY4R
793	371.222	-1.90302	0.107691	-8.38526	5.06148e-17	1.55731e-15	ENSG00000228716	1719	DHFR
794	285.539	2.31062	0.156309	8.38479	5.08172e-17	1.56157e-15	ENSG00000169249	8233	ZRSR2
795	345.843	2.08538	0.129465	8.38356	5.13494e-17	1.57594e-15	ENSG00000144741	115286	SLC25A26
796	40.9767	-4.44961	0.411505	-8.38289	5.16416e-17	1.58292e-15	ENSG00000068078	2261	FGFR3
797	723.228	-1.8014	0.0956552	-8.378	5.38347e-17	1.64807e-15	ENSG00000019144	23187	PHLDB1
798	789.575	-1.77384	0.092459	-8.36954	5.78436e-17	1.76858e-15	ENSG00000102172	6611	SMS
799	128.036	-2.46252	0.174757	-8.36885	5.81836e-17	1.77675e-15	ENSG00000177106	64787	EPS8L2
800	444.082	2.03582	0.123817	8.36574	5.97373e-17	1.81974e-15	ENSG00000059728	4084	MXD1
801	2222.57	1.96481	0.115329	8.36574	5.97406e-17	1.81974e-15	ENSG00000198862	26046	LTN1
802	81.5704	-3.07625	0.248411	-8.35813	6.37227e-17	1.93862e-15	ENSG00000232774	NA
803	96.3207	-2.68613	0.20181	-8.35504	6.54111e-17	1.98751e-15	ENSG00000236333	NA	TRHDE-AS1
804	299.064	2.15909	0.138748	8.35388	6.60576e-17	2.00465e-15	ENSG00000006652	3475	IFRD1
805	280.095	2.21304	0.145272	8.35017	6.81627e-17	2.06597e-15	ENSG00000256087	9668	ZNF432
806	1394.29	1.75831	0.0908277	8.34886	6.89244e-17	2.08646e-15	ENSG00000135968	9648	GCC2
807	811.865	-1.76555	0.0917157	-8.34697	7.00379e-17	2.11754e-15	ENSG00000112984	10112	KIF20A
808	91.304	-2.98146	0.237543	-8.34149	7.33622e-17	2.2153e-15	ENSG00000097046	8317	CDC7
809	380.178	-2.11298	0.133477	-8.33834	7.53427e-17	2.2723e-15	ENSG00000127824	7277	TUBA4A
810	86.5012	4.73448	0.447988	8.33612	7.67676e-17	2.31241e-15	ENSG00000132692	63827	BCAN
811	1368.45	1.6996	0.0840375	8.32488	8.4415e-17	2.53963e-15	ENSG00000148229	54107	POLE3
812	254.477	10.8472	1.18345	8.32075	8.74091e-17	2.62647e-15	ENSG00000130487	113730	KLHDC7B
813	2757.79	1.73345	0.0881746	8.31815	8.93487e-17	2.68145e-15	ENSG00000077232	54431	DNAJC10
814	166.143	-2.49842	0.180453	-8.30368	1.00933e-16	3.02437e-15	ENSG00000112183	221662	RBM24
815	303.29	-2.31214	0.158021	-8.30358	1.01023e-16	3.02437e-15	ENSG00000173068	54796	BNC2
816	805.89	-1.80532	0.0970472	-8.29828	1.05629e-16	3.15839e-15	ENSG00000196588	57591	MRTFA
817	66.9497	-2.97244	0.237917	-8.29042	1.12851e-16	3.37019e-15	ENSG00000074219	8463	TEAD2
818	784.369	-2.01136	0.122003	-8.28965	1.13586e-16	3.38799e-15	ENSG00000196787	8969	H2AC11
819	895.53	1.85149	0.10276	8.2862	1.16921e-16	3.4832e-15	ENSG00000198315	7745	ZKSCAN8
820	330.732	-2.131	0.136615	-8.27877	1.24454e-16	3.70311e-15	ENSG00000197461	5154	PDGFA
821	496.285	-2.19575	0.144569	-8.27117	1.3265e-16	3.94216e-15	ENSG00000198743	6526	SLC5A3
822	232.237	2.35297	0.163598	8.2701	1.33846e-16	3.97287e-15	ENSG00000119661	83544	DNAL1
823	135.517	-4.5935	0.434629	-8.26797	1.36264e-16	4.03975e-15	ENSG00000260604	NA
824	369.625	-2.08081	0.130765	-8.26525	1.39399e-16	4.12768e-15	ENSG00000124225	56937	PMEPA1
825	307.178	2.23827	0.150117	8.24864	1.60207e-16	4.73804e-15	ENSG00000185621	89782	LMLN
826	429.656	1.95152	0.115376	8.24711	1.62265e-16	4.7931e-15	ENSG00000116922	54955	C1orf109
827	80.3791	-2.95752	0.237542	-8.24072	1.71178e-16	5.05027e-15	ENSG00000150764	85458	DIXDC1
828	76.0866	-2.97189	0.239425	-8.23594	1.78154e-16	5.24974e-15	ENSG00000246273	283104	SBF2-AS1
829	167.988	-3.65328	0.322253	-8.23352	1.8179e-16	5.35041e-15	ENSG00000176697	627	BDNF
830	221.969	2.31253	0.159426	8.23285	1.82813e-16	5.37403e-15	ENSG00000010219	8798	DYRK4
831	37.0835	-4.50015	0.425259	-8.23063	1.86226e-16	5.46777e-15	ENSG00000120937	4879	NPPB
832	927.328	1.77369	0.0940606	8.22547	1.94424e-16	5.70163e-15	ENSG00000130766	83667	SESN2
833	122.276	-2.3898	0.169059	-8.22076	2.02226e-16	5.92329e-15	ENSG00000175505	23529	CLCF1
834	1992.38	1.69451	0.0844899	8.22004	2.03428e-16	5.95138e-15	ENSG00000125651	2962	GTF2F1
835	378.735	2.03596	0.126045	8.21895	2.05291e-16	5.99868e-15	ENSG00000076650	55094	GPATCH1
836	359.449	-2.16298	0.142017	-8.18901	2.63378e-16	7.68679e-15	ENSG00000128294	8459	TPST2
837	374.207	-3.31273	0.283093	-8.1695	3.09662e-16	9.0268e-15	ENSG00000107104	23189	KANK1
838	352.503	-2.0959	0.134152	-8.16909	3.10713e-16	9.04663e-15	ENSG00000149260	726	CAPN5
839	3265.06	-1.6613	0.0809874	-8.16545	3.20233e-16	9.31273e-15	ENSG00000094916	23468	CBX5
840	19594	-1.74575	0.0914304	-8.15644	3.45033e-16	1.0022e-14	ENSG00000100345	4627	MYH9
841	579.332	1.89951	0.110323	8.15348	3.53601e-16	1.02586e-14	ENSG00000134058	1022	CDK7
842	209.354	2.32321	0.162371	8.1493	3.66042e-16	1.05944e-14	ENSG00000132326	8864	PER2
843	70.0031	-4.85155	0.472623	-8.14931	3.66015e-16	1.05944e-14	ENSG00000166106	170689	ADAMTS15
844	4095.68	-1.82958	0.101863	-8.14408	3.82162e-16	1.10478e-14	ENSG00000161638	3678	ITGA5
845	7243.21	-1.50666	0.0623291	-8.12881	4.3354e-16	1.25183e-14	ENSG00000072110	87	ACTN1
846	195.862	-2.20438	0.148175	-8.12807	4.36192e-16	1.258e-14	ENSG00000113070	1839	HBEGF
847	772.734	1.78601	0.0967861	8.12113	4.61849e-16	1.33042e-14	ENSG00000132768	1802	DPH2
848	1452.43	1.63469	0.0781635	8.12009	4.65842e-16	1.34034e-14	ENSG00000134697	29889	GNL2
849	233.603	2.26494	0.155794	8.11931	4.68857e-16	1.34742e-14	ENSG00000119328	54942	ABITRAM
850	2914.35	1.66449	0.0818458	8.11877	4.70913e-16	1.35174e-14	ENSG00000164151	23379	ICE1
851	654.243	-1.97685	0.120324	-8.11848	4.72076e-16	1.35349e-14	ENSG00000073712	10979	FERMT2
852	117.662	-2.6616	0.204685	-8.11784	4.74553e-16	1.35899e-14	ENSG00000188483	389792	IER5L
853	1474.02	1.66332	0.0817502	8.114	4.89784e-16	1.40097e-14	ENSG00000143183	54499	TMCO1
854	169.514	-2.5373	0.189502	-8.11231	4.96675e-16	1.41901e-14	ENSG00000197905	7004	TEAD4
855	1441.8	-2.64802	0.20318	-8.11115	5.01446e-16	1.43097e-14	ENSG00000198768	164284	APCDD1L
856	1485.12	1.69304	0.0855685	8.09921	5.53184e-16	1.57677e-14	ENSG00000198815	22887	FOXJ3
857	36.8852	-4.03783	0.375111	-8.09849	5.56439e-16	1.5842e-14	ENSG00000171873	146	ADRA1D
858	805.341	1.85531	0.105636	8.09677	5.64397e-16	1.60498e-14	ENSG00000113552	10007	GNPDA1
859	203.446	-2.24253	0.153466	-8.09646	5.65825e-16	1.60717e-14	ENSG00000174791	9610	RIN1
860	1406.18	1.74878	0.092487	8.09611	5.67457e-16	1.60993e-14	ENSG00000136010	160428	ALDH1L2
861	467.319	-1.85056	0.105177	-8.08694	6.11827e-16	1.73379e-14	ENSG00000274070	729438	CASTOR2
862	71.5566	-3.25372	0.278697	-8.08663	6.13405e-16	1.73625e-14	ENSG00000129538	6035	RNASE1
863	323.972	2.05211	0.13043	8.06645	7.23743e-16	2.04619e-14	ENSG00000164117	NA	FBXO8
864	1344.23	1.71716	0.0889509	8.06239	7.48193e-16	2.11287e-14	ENSG00000204619	6992	PPP1R11
865	172.719	-2.19837	0.148698	-8.05912	7.6848e-16	2.16765e-14	ENSG00000222038	653781	POTEJ
866	854.104	-1.73312	0.0909885	-8.05729	7.80063e-16	2.19778e-14	ENSG00000065882	23216	TBC1D1
867	247.749	2.38175	0.171522	8.05585	7.8926e-16	2.22113e-14	ENSG00000140678	3687	ITGAX
868	96.3465	-2.78947	0.222196	-8.05357	8.04129e-16	2.26036e-14	ENSG00000174032	253512	SLC25A30
869	742.212	1.89867	0.111722	8.04379	8.70993e-16	2.4455e-14	ENSG00000166848	54386	TERF2IP
870	831.887	-2.54164	0.191726	-8.04089	8.9189e-16	2.50129e-14	ENSG00000163171	10602	CDC42EP3
871	983.88	1.8476	0.105458	8.03733	9.18197e-16	2.57211e-14	ENSG00000131871	55829	SELENOS
872	383.663	2.10315	0.137347	8.03179	9.60578e-16	2.68775e-14	ENSG00000269937	NA
873	1624.39	1.86973	0.108379	8.02496	1.01556e-15	2.83833e-14	ENSG00000205765	285636	C5orf51
874	305.329	-3.0581	0.256633	-8.01963	1.06061e-15	2.96086e-14	ENSG00000114251	7474	WNT5A
875	59.0424	-3.00493	0.250008	-8.01947	1.06203e-15	2.96143e-14	ENSG00000169174	255738	PCSK9
876	191.94	2.40101	0.174781	8.01577	1.09451e-15	3.04851e-14	ENSG00000184205	NA	TSPYL2
877	348.637	2.1976	0.149481	8.0117	1.13131e-15	3.1474e-14	ENSG00000159314	201176	ARHGAP27
878	216.246	2.33151	0.166215	8.01078	1.13986e-15	3.16758e-14	ENSG00000081181	384	ARG2
879	196.257	2.37284	0.172465	7.96008	1.71929e-15	4.77235e-14	ENSG00000286381	105373085
880	4533.25	1.616	0.0775661	7.94163	1.99544e-15	5.53259e-14	ENSG00000038219	259282	BOD1L1
881	73.8858	-2.93071	0.243295	-7.93568	2.09351e-15	5.79791e-14	ENSG00000283154	29970	IQCJ-SCHIP1
882	73.8858	-2.93071	0.243295	-7.93568	2.09351e-15	5.79791e-14	ENSG00000283154	100505385	IQCJ-SCHIP1
883	2217.12	-3.40239	0.302871	-7.93206	2.15539e-15	5.9625e-14	ENSG00000187498	1282	COL4A1
884	623.499	1.80855	0.10201	7.92617	2.26007e-15	6.245e-14	ENSG00000268350	29057	FAM156A
885	8391.67	-1.89762	0.113262	-7.92512	2.27923e-15	6.29082e-14	ENSG00000198712	4513	MT-CO2
886	91.1171	-2.79925	0.227047	-7.92455	2.28971e-15	6.31262e-14	ENSG00000130052	9754	STARD8
887	554.565	-1.93018	0.117385	-7.92418	2.29656e-15	6.32436e-14	ENSG00000115641	2274	FHL2
888	105.011	-3.92688	0.36939	-7.92355	2.30825e-15	6.34938e-14	ENSG00000216775	730101
889	727.448	-2.0004	0.126292	-7.92137	2.34911e-15	6.4545e-14	ENSG00000169641	7798	LUZP1
890	153.423	2.49689	0.189075	7.91691	2.43483e-15	6.6825e-14	ENSG00000134899	2073	ERCC5
891	40.0157	-3.81168	0.355157	-7.91673	2.43836e-15	6.68466e-14	ENSG00000099282	23555	TSPAN15
892	65.546	-2.95153	0.246518	-7.91637	2.4455e-15	6.69671e-14	ENSG00000066468	2263	FGFR2
893	905.455	-1.81885	0.103498	-7.91169	2.53915e-15	6.94537e-14	ENSG00000081923	5205	ATP8B1
894	181.323	-2.28862	0.162926	-7.90922	2.59008e-15	7.07675e-14	ENSG00000102996	NA	MMP15
895	253.139	2.29533	0.163972	7.89965	2.79683e-15	7.63308e-14	ENSG00000197620	91966	EOLA1
896	63.5897	4.91833	0.496106	7.89818	2.83006e-15	7.71516e-14	ENSG00000261114	NA
897	87.5024	-5.34394	0.550431	-7.89189	2.97638e-15	8.105e-14	ENSG00000117228	2633	GBP1
898	406.306	-1.98357	0.124755	-7.884	3.17059e-15	8.62421e-14	ENSG00000222041	112597	CYTOR
899	110.666	-4.01862	0.383319	-7.87496	3.40851e-15	9.26106e-14	ENSG00000285294	643650	LINC00842
900	573.952	1.85286	0.108426	7.86576	3.66849e-15	9.95635e-14	ENSG00000138002	26160	IFT172
901	116.044	-2.57533	0.20028	-7.86562	3.67274e-15	9.9568e-14	ENSG00000117602	11123	RCAN3
902	179.537	2.58426	0.201668	7.8558	3.97213e-15	1.07565e-13	ENSG00000197415	79674	VEPH1
903	3638.15	1.67486	0.0859149	7.85494	3.99951e-15	1.08186e-13	ENSG00000131263	51132	RLIM
904	209.348	-2.32994	0.169374	-7.85211	4.09107e-15	1.1054e-13	ENSG00000006062	9020	MAP3K14
905	1853.63	-2.52357	0.194051	-7.85142	4.11367e-15	1.11028e-13	ENSG00000131016	9590	AKAP12
906	433.968	-2.19548	0.152272	-7.85094	4.1294e-15	1.1133e-13	ENSG00000168807	6645	SNTB2
907	156.488	-2.28432	0.163776	-7.84189	4.43801e-15	1.19518e-13	ENSG00000196159	79633	FAT4
908	1662.81	1.6662	0.0849724	7.84023	4.49719e-15	1.20978e-13	ENSG00000103249	1186	CLCN7
909	409.742	1.94388	0.12047	7.83497	4.6895e-15	1.26012e-13	ENSG00000170448	152518	NFXL1
910	383.743	-1.90649	0.115814	-7.82711	4.9921e-15	1.33996e-13	ENSG00000133121	90627	STARD13
911	2443.38	1.55774	0.0713355	7.81853	5.34452e-15	1.43298e-13	ENSG00000165271	65083	NOL6
912	41.1954	-3.56757	0.328739	-7.81037	5.70212e-15	1.52718e-13	ENSG00000267218	NA
913	465.702	-2.05162	0.134687	-7.8079	5.81466e-15	1.55561e-13	ENSG00000182963	10052	GJC1
914	6240.03	1.52196	0.0668529	7.80764	5.82703e-15	1.55721e-13	ENSG00000171867	5621	PRNP
915	254.576	-2.13649	0.145693	-7.80061	6.16088e-15	1.64463e-13	ENSG00000160949	4796	TONSL
916	1487.78	-1.79192	0.101608	-7.79392	6.4964e-15	1.7323e-13	ENSG00000118257	8828	NRP2
917	257.159	-2.05556	0.135515	-7.78928	6.73926e-15	1.7951e-13	ENSG00000107331	20	ABCA2
918	314.093	-2.07862	0.138571	-7.78386	7.03435e-15	1.87166e-13	ENSG00000116774	56944	OLFML3
919	2362.11	-2.32458	0.170266	-7.77946	7.28343e-15	1.93582e-13	ENSG00000100234	7078	TIMP3
920	130.901	-3.5895	0.332885	-7.77897	7.31196e-15	1.94129e-13	ENSG00000277758	102724488
921	651.415	1.75972	0.0976787	7.77775	7.38239e-15	1.95786e-13	ENSG00000100592	23002	DAAM1
922	179.762	-2.16472	0.149878	-7.77113	7.7792e-15	2.06085e-13	ENSG00000146950	357	SHROOM2
923	369.646	1.98225	0.126476	7.76629	8.08193e-15	2.13873e-13	ENSG00000166435	143570	XRRA1
924	100.906	-2.58549	0.204169	-7.76559	8.12652e-15	2.1482e-13	ENSG00000174804	8322	FZD4
925	85.3039	-6.87393	0.75662	-7.76338	8.26968e-15	2.18368e-13	ENSG00000078401	1906	EDN1
926	61.7331	-2.93905	0.249861	-7.76052	8.45813e-15	2.23103e-13	ENSG00000176720	666	BOK
927	102.72	-2.38613	0.178631	-7.75975	8.50956e-15	2.24217e-13	ENSG00000007968	1870	E2F2
928	537.578	1.79093	0.101976	7.75609	8.75848e-15	2.30527e-13	ENSG00000115520	80219	COQ10B
929	130.264	-2.50619	0.194295	-7.7521	9.0382e-15	2.37633e-13	ENSG00000023697	51071	DERA
930	1990.18	-3.18637	0.282647	-7.73534	1.03128e-14	2.70854e-13	ENSG00000148677	27063	ANKRD1
931	40.589	-3.67044	0.345265	-7.73446	1.03845e-14	2.72442e-13	ENSG00000006377	1750	DLX6
932	256.252	-2.25511	0.162459	-7.72568	1.11259e-14	2.91579e-13	ENSG00000171608	5293	PIK3CD
933	422.539	-2.8494	0.239547	-7.72042	1.15949e-14	3.03545e-13	ENSG00000277443	4082	MARCKS
934	93.8724	4.19043	0.413361	7.71827	1.17915e-14	3.08361e-13	ENSG00000160181	7032	TFF2
935	554.869	-1.80992	0.104961	-7.71636	1.19699e-14	3.12692e-13	ENSG00000100304	23170	TTLL12
936	5965.75	1.52353	0.0678763	7.71301	1.22886e-14	3.20674e-13	ENSG00000106636	10652	YKT6
937	118.103	-2.3847	0.17972	-7.70475	1.31098e-14	3.41736e-13	ENSG00000087510	7022	TFAP2C
938	63.5486	-3.01321	0.261403	-7.70155	1.34424e-14	3.50032e-13	ENSG00000104368	5327	PLAT
939	1530.43	1.61798	0.0802552	7.7002	1.35849e-14	3.53367e-13	ENSG00000092203	9878	TOX4
940	362.965	-2.0044	0.130454	-7.69929	1.36827e-14	3.55531e-13	ENSG00000140332	7090	TLE3
941	89.657	3.24251	0.291379	7.6962	1.40175e-14	3.63844e-13	ENSG00000159885	7673	ZNF222
942	876.952	1.80038	0.104124	7.68683	1.50824e-14	3.9107e-13	ENSG00000257093	57189	DENND11
943	10711.3	-1.59424	0.0773427	-7.68324	1.5512e-14	4.01782e-13	ENSG00000167601	558	AXL
944	71.5195	4.14885	0.409885	7.68229	1.56269e-14	4.04328e-13	ENSG00000099338	57828	CATSPERG
945	102.48	3.10598	0.274349	7.6763	1.63755e-14	4.23247e-13	ENSG00000164746	136288	C7orf57
946	532.682	-1.97099	0.126498	-7.67592	1.64233e-14	4.24034e-13	ENSG00000138356	316	AOX1
947	225.027	-2.04517	0.136201	-7.67373	1.67059e-14	4.30876e-13	ENSG00000214391	NA	TUBAP2
948	1859.41	1.61083	0.0796176	7.67201	1.69323e-14	4.36254e-13	ENSG00000149658	54915	YTHDF1
949	1454.67	1.57159	0.0745309	7.66917	1.73118e-14	4.4556e-13	ENSG00000100196	11015	KDELR3
950	6411.52	-1.63889	0.0833668	-7.66365	1.80715e-14	4.64622e-13	ENSG00000167460	7171	TPM4
951	1923.15	1.70948	0.0926033	7.66153	1.83729e-14	4.71874e-13	ENSG00000134987	134430	WDR36
952	46.9817	-3.15853	0.281811	-7.65952	1.86634e-14	4.78831e-13	ENSG00000169862	1501	CTNND2
953	73.1063	-2.77213	0.231399	-7.65833	1.88362e-14	4.82757e-13	ENSG00000100344	80339	PNPLA3
954	934.274	1.68139	0.08898	7.65774	1.89234e-14	4.84483e-13	ENSG00000172269	1798	DPAGT1
955	45.5559	-3.70712	0.353938	-7.64856	2.03249e-14	5.1982e-13	ENSG00000237424	84793	FOXD2-AS1
956	78.5858	3.7689	0.3621	7.64678	2.06077e-14	5.26499e-13	ENSG00000235944	NA	ZNF815P
957	3821.83	-1.68734	0.08992	-7.64394	2.10677e-14	5.3769e-13	ENSG00000075426	2355	FOSL2
958	629.756	-1.83457	0.109222	-7.64104	2.15482e-14	5.49378e-13	ENSG00000115884	6382	SDC1
959	645.512	1.79466	0.10401	7.64025	2.168e-14	5.52161e-13	ENSG00000136052	84102	SLC41A2
960	847.2	1.80287	0.105102	7.63894	2.19022e-14	5.57239e-13	ENSG00000011021	1185	CLCN6
961	168.211	-2.34222	0.175716	-7.63857	2.19651e-14	5.58256e-13	ENSG00000005249	5577	PRKAR2B
962	3017.2	-1.82268	0.107707	-7.63809	2.20461e-14	5.59732e-13	ENSG00000063660	2817	GPC1
963	917.171	-2.93786	0.253912	-7.63199	2.31153e-14	5.86268e-13	ENSG00000166949	4088	SMAD3
964	270.337	2.13669	0.149191	7.619	2.55644e-14	6.47039e-13	ENSG00000105948	79989	TTC26
965	53.3491	-3.0727	0.272043	-7.61902	2.5561e-14	6.47039e-13	ENSG00000029534	286	ANK1
966	87.8888	-4.45397	0.454255	-7.60359	2.88028e-14	7.28248e-13	ENSG00000214357	54492	NEURL1B
967	498.536	1.81078	0.106668	7.60098	2.939e-14	7.42327e-13	ENSG00000117481	387338	NSUN4
968	138.465	2.68529	0.22183	7.59724	3.02516e-14	7.63298e-13	ENSG00000170417	130827	TMEM182
969	38.6815	-3.61384	0.344177	-7.59447	3.09052e-14	7.78984e-13	ENSG00000175305	9134	CCNE2
970	115.925	-2.58998	0.209499	-7.58943	3.2132e-14	8.09061e-13	ENSG00000182752	5069	PAPPA
971	177.518	-2.16748	0.153832	-7.5893	3.21648e-14	8.09061e-13	ENSG00000176834	54621	VSIG10
972	1761.56	1.61334	0.080869	7.58437	3.34103e-14	8.39523e-13	ENSG00000068912	27248	ERLEC1
973	39.1794	-6.82124	0.767592	-7.58377	3.35646e-14	8.42535e-13	ENSG00000131386	117248	GALNT15
974	1182.65	1.77522	0.102348	7.57437	3.60888e-14	9.04965e-13	ENSG00000078246	7289	TULP3
975	832.486	1.68245	0.0901024	7.57418	3.61393e-14	9.053e-13	ENSG00000179151	80153	EDC3
976	112.193	-2.38184	0.182556	-7.5694	3.74949e-14	9.38296e-13	ENSG00000160190	54020	SLC37A1
977	3145.36	-1.59675	0.0788619	-7.56703	3.81852e-14	9.54592e-13	ENSG00000002834	3927	LASP1
978	2302.76	-1.64831	0.0857231	-7.56281	3.94462e-14	9.85105e-13	ENSG00000288701	84726	PRRC2B
979	1103.4	-1.64019	0.0846643	-7.56154	3.98315e-14	9.93709e-13	ENSG00000160285	4047	LSS
980	337.302	-2.15431	0.152674	-7.56057	4.01295e-14	1.00012e-12	ENSG00000157350	6483	ST3GAL2
981	60.5041	-2.98171	0.262423	-7.55158	4.30023e-14	1.07063e-12	ENSG00000170989	1901	S1PR1
982	797.487	-1.76468	0.101291	-7.54939	4.37294e-14	1.08762e-12	ENSG00000270276	554313	H4C15
983	253.329	-2.0735	0.142333	-7.54218	4.62169e-14	1.14831e-12	ENSG00000137502	27314	RAB30
984	1418.74	1.66883	0.088755	7.53563	4.85969e-14	1.205e-12	ENSG00000157741	254048	UBN2
985	173.704	2.29773	0.17221	7.53573	4.85617e-14	1.205e-12	ENSG00000179148	59344	ALOXE3
986	83.2248	-2.79894	0.239074	-7.52459	5.28843e-14	1.30997e-12	ENSG00000104783	3783	KCNN4
987	56.8848	-2.94623	0.258701	-7.52309	5.34985e-14	1.32384e-12	ENSG00000140451	80119	PIF1
988	355.762	1.97224	0.129359	7.51586	5.6538e-14	1.39764e-12	ENSG00000155906	55005	RMND1
989	413.641	2.04371	0.138883	7.51506	5.68858e-14	1.40482e-12	ENSG00000187800	375033	PEAR1
990	2926.38	1.59497	0.0791916	7.51307	5.77588e-14	1.42493e-12	ENSG00000141252	55275	VPS53
991	215.59	-2.04052	0.138635	-7.50551	6.11887e-14	1.50802e-12	ENSG00000100526	1033	CDKN3
992	239.362	-2.14499	0.152568	-7.50477	6.15353e-14	1.51504e-12	ENSG00000148737	6934	TCF7L2
993	263.621	2.01438	0.135295	7.49752	6.50383e-14	1.59967e-12	ENSG00000186020	57711	ZNF529
994	48.2964	-3.36547	0.315674	-7.4934	6.71125e-14	1.64902e-12	ENSG00000278463	8335	H2AC4
995	1133.99	-1.71642	0.0956546	-7.48967	6.90457e-14	1.69481e-12	ENSG00000154978	81552	VOPP1
996	1532.7	1.66257	0.0885084	7.48594	7.10359e-14	1.74192e-12	ENSG00000105402	8775	NAPA
997	186.221	-2.3482	0.180425	-7.47236	7.87717e-14	1.92967e-12	ENSG00000189052	93659	CGB5
998	134.655	-2.38241	0.185083	-7.4691	8.07439e-14	1.976e-12	ENSG00000107338	NA	SHB
999	467.077	-1.74015	0.0992303	-7.4589	8.72494e-14	2.13306e-12	ENSG00000015532	64132	XYLT2
1000	441.379	1.88279	0.118369	7.45794	8.78848e-14	2.14645e-12	ENSG00000158480	9825	SPATA2
1001	581.804	-2.54266	0.206858	-7.45755	8.81464e-14	2.14975e-12	ENSG00000151388	81792	ADAMTS12
1002	3657.59	1.48222	0.0646624	7.45747	8.81963e-14	2.14975e-12	ENSG00000182934	6734	SRPRA
1003	235.816	-1.97716	0.131038	-7.45709	8.84545e-14	2.15389e-12	ENSG00000189337	23254	KAZN
1004	146.996	-2.15877	0.155407	-7.45636	8.89424e-14	2.16361e-12	ENSG00000143061	3321	IGSF3
1005	151.734	-2.42001	0.19073	-7.44514	9.68425e-14	2.35345e-12	ENSG00000121210	23240	TMEM131L
1006	485.734	-3.43977	0.328095	-7.43617	1.03649e-13	2.51635e-12	ENSG00000143507	NA	DUSP10
1007	56.8569	-3.0152	0.271145	-7.43219	1.06817e-13	2.59069e-12	ENSG00000114790	26084	ARHGEF26
1008	1494.17	1.6774	0.0914288	7.40907	1.27188e-13	3.0817e-12	ENSG00000117410	533	ATP6V0B
1009	106.668	2.72263	0.232649	7.40445	1.31699e-13	3.18782e-12	ENSG00000168826	166793	ZBTB49
1010	2454.58	-1.71616	0.0968603	-7.39377	1.42724e-13	3.45125e-12	ENSG00000231991	NA	ANXA2P2
1011	1295.4	-1.68398	0.092539	-7.39125	1.45451e-13	3.51372e-12	ENSG00000089159	5829	PXN
1012	73.0841	5.94943	0.669974	7.3875	1.49616e-13	3.61076e-12	ENSG00000102409	56271	BEX4
1013	150.77	-2.16634	0.157964	-7.3836	1.54065e-13	3.71447e-12	ENSG00000165244	NA	ZNF367
1014	289.058	2.23294	0.166991	7.3833	1.54412e-13	3.71548e-12	ENSG00000239665	NA
1015	875.338	1.76419	0.103502	7.3834	1.54296e-13	3.71548e-12	ENSG00000185344	23545	ATP6V0A2
1016	104.071	2.82847	0.247919	7.37528	1.64005e-13	3.94241e-12	ENSG00000164778	2020	EN2
1017	402.226	1.94211	0.127933	7.3641	1.78346e-13	4.28295e-12	ENSG00000132661	NA	NXT1
1018	485.792	-1.75907	0.10313	-7.36034	1.83449e-13	4.40115e-12	ENSG00000162591	1953	MEGF6
1019	58.594	4.6767	0.499697	7.35786	1.86876e-13	4.47897e-12	ENSG00000227038	NA	GTF2IP7
1020	871.741	1.7619	0.103602	7.35414	1.92158e-13	4.60104e-12	ENSG00000204178	55219	MACO1
1021	30.0473	-4.3153	0.450935	-7.35206	1.95177e-13	4.66874e-12	ENSG00000187714	6572	SLC18A3
1022	197.949	2.2312	0.167536	7.34887	1.99891e-13	4.77682e-12	ENSG00000125846	7692	ZNF133
1023	26903.4	-3.35571	0.321009	-7.33845	2.16075e-13	5.15852e-12	ENSG00000108821	1277	COL1A1
1024	383.483	-2.11757	0.152326	-7.33666	2.18982e-13	5.22282e-12	ENSG00000251493	2297	FOXD1
1025	842.909	-1.80291	0.10947	-7.33451	2.22541e-13	5.30252e-12	ENSG00000068489	55771	PRR11
1026	86.5801	-2.76332	0.240458	-7.33317	2.24776e-13	5.35054e-12	ENSG00000223749	NA	MIR503HG
1027	28.8866	-4.14531	0.428925	-7.333	2.25057e-13	5.35202e-12	ENSG00000147234	84443	FRMPD3
1028	864.51	1.77487	0.105709	7.33018	2.29843e-13	5.4605e-12	ENSG00000164187	92255	LMBRD2
1029	87.6225	6.44753	0.743233	7.3295	2.3102e-13	5.48313e-12	ENSG00000174951	2523	FUT1
1030	69.2979	-2.86423	0.254411	-7.32765	2.34228e-13	5.55386e-12	ENSG00000282057	NA
1031	55.7379	-3.19535	0.299744	-7.32409	2.40521e-13	5.69753e-12	ENSG00000164251	2150	F2RL1
1032	191.177	2.36968	0.187076	7.32149	2.45234e-13	5.80354e-12	ENSG00000103021	29070	CCDC113
1033	314.978	-1.98036	0.134035	-7.31419	2.5894e-13	6.12197e-12	ENSG00000107282	320	APBA1
1034	224.128	2.19427	0.163304	7.31319	2.60883e-13	6.16194e-12	ENSG00000165630	8559	PRPF18
1035	1282.55	1.60885	0.0832897	7.31005	2.67053e-13	6.30156e-12	ENSG00000205302	6643	SNX2
1036	2696.7	-1.59413	0.0813259	-7.30557	2.76098e-13	6.50872e-12	ENSG00000099194	6319	SCD
1037	1461.03	-2.84873	0.253204	-7.30135	2.84898e-13	6.70968e-12	ENSG00000139926	122786	FRMD6
1038	442.977	-1.85546	0.117215	-7.2982	2.91637e-13	6.86176e-12	ENSG00000153976	NA	HS3ST3A1
1039	584.705	1.88503	0.12129	7.2968	2.94686e-13	6.92682e-12	ENSG00000165240	538	ATP7A
1040	179.058	2.39002	0.19062	7.29211	3.05131e-13	7.16543e-12	ENSG00000256223	7556	ZNF10
1041	544.183	1.92532	0.127044	7.28349	3.25299e-13	7.63171e-12	ENSG00000135297	25821	MTO1
1042	102.907	2.86034	0.255436	7.28299	3.26511e-13	7.65278e-12	ENSG00000136866	7539	ZFP37
1043	371.509	1.98099	0.134709	7.28231	3.28148e-13	7.67641e-12	ENSG00000198393	7574	ZNF26
1044	577.284	1.90168	0.123817	7.28241	3.27902e-13	7.67641e-12	ENSG00000104825	4793	NFKBIB
1045	248.957	-2.0645	0.146257	-7.27826	3.3815e-13	7.90281e-12	ENSG00000099860	4616	GADD45B
1046	641.903	-1.69969	0.0961452	-7.27746	3.40155e-13	7.94205e-12	ENSG00000205726	6453	ITSN1
1047	478.089	-1.94427	0.129814	-7.27397	3.49075e-13	8.14253e-12	ENSG00000198604	11177	BAZ1A
1048	263.909	-2.05067	0.144503	-7.27096	3.56949e-13	8.31824e-12	ENSG00000134516	1794	DOCK2
1049	499.586	1.86407	0.118844	7.27061	3.57879e-13	8.33196e-12	ENSG00000155744	285172	FAM126B
1050	424.249	1.79764	0.109852	7.26099	3.84281e-13	8.9381e-12	ENSG00000135750	3775	KCNK1
1051	321.362	-2.03111	0.142118	-7.2553	4.00778e-13	9.31295e-12	ENSG00000118922	11278	KLF12
1052	36.3244	-3.69994	0.372199	-7.25403	4.04562e-13	9.39192e-12	ENSG00000162496	9249	DHRS3
1053	81.8965	-2.5918	0.219628	-7.24771	4.23888e-13	9.83121e-12	ENSG00000183935	93164	HTR7P1
1054	144.856	-2.27269	0.175771	-7.24061	4.46659e-13	1.03495e-11	ENSG00000187231	91404	SESTD1
1055	7259.25	1.46815	0.0646627	7.2398	4.49332e-13	1.04016e-11	ENSG00000148396	9919	SEC16A
1056	69.9285	-2.72679	0.238536	-7.23911	4.51649e-13	1.04453e-11	ENSG00000175643	NA	RMI2
1057	198.555	-2.01611	0.140544	-7.22982	4.83643e-13	1.11746e-11	ENSG00000133935	11161	ERG28
1058	131.872	-4.47892	0.481547	-7.22446	5.03081e-13	1.16127e-11	ENSG00000196628	6925	TCF4
1059	94.9933	-2.51709	0.210112	-7.22038	5.18412e-13	1.19553e-11	ENSG00000182463	128553	TSHZ2
1060	65.9054	4.08153	0.426897	7.21845	5.25838e-13	1.21151e-11	ENSG00000163884	28999	KLF15
1061	280.76	2.06183	0.14724	7.21156	5.53154e-13	1.27325e-11	ENSG00000251022	NA	THAP9-AS1
1062	63.0939	-2.79236	0.248621	-7.2092	5.62815e-13	1.29426e-11	ENSG00000174469	26047	CNTNAP2
1063	702.468	1.74609	0.103534	7.2062	5.75361e-13	1.32187e-11	ENSG00000058600	55718	POLR3E
1064	1642.29	-1.56985	0.079109	-7.20338	5.87376e-13	1.3482e-11	ENSG00000198911	6721	SREBF2
1065	214.528	-1.96935	0.134602	-7.20156	5.95294e-13	1.36509e-11	ENSG00000133401	23037	PDZD2
1066	454.927	1.86734	0.120619	7.19077	6.44278e-13	1.47603e-11	ENSG00000143067	90874	ZNF697
1067	27.4726	-4.78815	0.526945	-7.18888	6.53228e-13	1.49513e-11	ENSG00000261553	NA
1068	117.84	2.6089	0.223818	7.18844	6.5537e-13	1.49863e-11	ENSG00000077984	8530	CST7
1069	950.95	-1.68819	0.0957508	-7.18733	6.60701e-13	1.5094e-11	ENSG00000243156	57553	MICAL3
1070	133.102	-2.21555	0.169148	-7.1863	6.65722e-13	1.51945e-11	ENSG00000170545	57228	SMAGP
1071	645.515	1.73725	0.102665	7.18115	6.91279e-13	1.57631e-11	ENSG00000100284	10043	TOM1
1072	102.849	-2.52334	0.212214	-7.17834	7.05626e-13	1.60752e-11	ENSG00000174332	148979	GLIS1
1073	80.389	-2.67134	0.232843	-7.17797	7.07531e-13	1.61036e-11	ENSG00000129521	112399	EGLN3
1074	36.4271	-3.55058	0.356166	-7.16122	7.99633e-13	1.81829e-11	ENSG00000264717	100996758	NPY4R2
1075	1389.43	1.64186	0.0897251	7.15361	8.45252e-13	1.92023e-11	ENSG00000116198	9731	CEP104
1076	111.58	-2.39805	0.195697	-7.14392	9.07075e-13	2.05876e-11	ENSG00000277778	595135	PGM5P2
1077	813.131	1.73809	0.103331	7.14291	9.13786e-13	2.07207e-11	ENSG00000174485	10260	DENND4A
1078	923.559	1.77369	0.108335	7.14165	9.22191e-13	2.08919e-11	ENSG00000165813	55088	CCDC186
1079	4420.48	-2.37835	0.193094	-7.13823	9.45432e-13	2.13985e-11	ENSG00000128567	5420	PODXL
1080	211.063	2.14236	0.160289	7.12689	1.02665e-12	2.32152e-11	ENSG00000163393	55356	SLC22A15
1081	550.543	-1.81246	0.114035	-7.1247	1.04304e-12	2.3564e-11	ENSG00000155254	83742	MARVELD1
1082	111.163	9.47943	1.19043	7.123	1.05603e-12	2.38354e-11	ENSG00000129993	863	CBFA2T3
1083	1002.09	-1.86545	0.121648	-7.11437	1.12427e-12	2.53522e-11	ENSG00000159216	861	RUNX1
1084	1002.09	-1.86545	0.121648	-7.11437	1.12427e-12	2.53522e-11	ENSG00000159216	100506403	RUNX1
1085	224.365	-2.96917	0.276795	-7.11416	1.12593e-12	2.53661e-11	ENSG00000139211	347902	AMIGO2
1086	1435.69	1.68341	0.0961235	7.10974	1.16264e-12	2.6169e-11	ENSG00000166579	81565	NDEL1
1087	1110.11	1.69415	0.0977292	7.10279	1.22264e-12	2.74941e-11	ENSG00000106638	26608	TBL2
1088	400.817	-1.89637	0.126253	-7.09982	1.24919e-12	2.80654e-11	ENSG00000174099	253827	MSRB3
1089	755.773	1.78229	0.110225	7.09716	1.27343e-12	2.85837e-11	ENSG00000161996	NA	WDR90
1090	500.178	-1.90819	0.128036	-7.09325	1.30996e-12	2.93765e-11	ENSG00000162702	23528	ZNF281
1091	327.013	1.9832	0.138624	7.09256	1.3165e-12	2.94961e-11	ENSG00000163156	79005	SCNM1
1092	327.013	1.9832	0.138624	7.09256	1.3165e-12	2.94961e-11	ENSG00000163156	100534012	SCNM1
1093	86.7699	-5.06982	0.574183	-7.08803	1.36037e-12	3.0451e-11	ENSG00000082497	56256	SERTAD4
1094	72.7658	3.63017	0.371107	7.08736	1.36692e-12	3.05697e-11	ENSG00000241743	NA	XACT
1095	454.682	1.77718	0.10972	7.08327	1.40793e-12	3.14293e-11	ENSG00000148399	92715	DPH7
1096	109.564	-2.33933	0.189081	-7.08336	1.40702e-12	3.14293e-11	ENSG00000133466	114904	C1QTNF6
1097	439.277	1.8756	0.123668	7.08028	1.43865e-12	3.20857e-11	ENSG00000111725	5564	PRKAB1
1098	703.495	-1.83988	0.118701	-7.07557	1.4883e-12	3.31627e-11	ENSG00000104332	6422	SFRP1
1099	9849.05	-2.30322	0.184253	-7.07301	1.51605e-12	3.37501e-11	ENSG00000205426	3887	KRT81
1100	963.006	-1.90861	0.12859	-7.066	1.59463e-12	3.5467e-11	ENSG00000166851	5347	PLK1
1101	543.578	-1.89231	0.126393	-7.05981	1.66731e-12	3.70498e-11	ENSG00000106571	2737	GLI3
1102	514.488	-1.78691	0.111494	-7.05792	1.69013e-12	3.75227e-11	ENSG00000142197	9980	DOP1B
1103	558.43	1.72832	0.103226	7.05561	1.71847e-12	3.81171e-11	ENSG00000197608	284371	ZNF841
1104	462.134	1.98987	0.140326	7.05404	1.73797e-12	3.85147e-11	ENSG00000141504	112483	SAT2
1105	424.472	-2.81486	0.257392	-7.05096	1.77685e-12	3.93407e-11	ENSG00000155090	7071	KLF10
1106	128.224	-2.28386	0.182164	-7.04786	1.81696e-12	4.01921e-11	ENSG00000181143	94025	MUC16
1107	1039.04	1.68903	0.0979051	7.03768	1.95462e-12	4.31982e-11	ENSG00000111674	2026	ENO2
1108	486.608	-1.67473	0.0959508	-7.03201	2.03576e-12	4.49506e-11	ENSG00000186350	6256	RXRA
1109	369.893	-1.99945	0.142269	-7.02504	2.14005e-12	4.72108e-11	ENSG00000231290	149773	APCDD1L-DT
1110	487.303	-1.83648	0.119121	-7.02209	2.18568e-12	4.81304e-11	ENSG00000084636	1307	COL16A1
1111	249.214	-2.02376	0.14579	-7.02215	2.18481e-12	4.81304e-11	ENSG00000143797	129642	MBOAT2
1112	1329	1.64059	0.0912411	7.02089	2.20467e-12	4.85047e-11	ENSG00000138078	9581	PREPL
1113	1746.05	-2.76479	0.25177	-7.00953	2.39125e-12	5.25623e-11	ENSG00000115419	2744	GLS
1114	788.503	1.67729	0.0966898	7.00472	2.47476e-12	5.4349e-11	ENSG00000165406	220972	MARCHF8
1115	1472.76	-1.72675	0.103759	-7.0042	2.48395e-12	5.45016e-11	ENSG00000128283	NA	CDC42EP1
1116	1419.16	-2.36128	0.194447	-7.00079	2.54518e-12	5.57951e-11	ENSG00000135905	55619	DOCK10
1117	95.3216	-2.35221	0.193181	-6.99973	2.56459e-12	5.61701e-11	ENSG00000135045	NA	C9orf40
1118	163.875	2.31326	0.18763	6.99923	2.57381e-12	5.63213e-11	ENSG00000137821	54839	LRRC49
1119	260.648	-2.07761	0.154071	-6.99428	2.66624e-12	5.82917e-11	ENSG00000118515	6446	SGK1
1120	1126.53	1.68879	0.0985026	6.99263	2.69777e-12	5.89283e-11	ENSG00000067208	7813	EVI5
1121	274.467	2.06394	0.152193	6.99074	2.73445e-12	5.96761e-11	ENSG00000101624	79959	CEP76
1122	1045.55	1.62364	0.0892123	6.99056	2.73792e-12	5.96985e-11	ENSG00000144867	58477	SRPRB
1123	246.934	-1.96502	0.138128	-6.98642	2.81985e-12	6.14299e-11	ENSG00000168078	55872	PBK
1124	11355.2	-1.68986	0.0987549	-6.98554	2.83766e-12	6.17628e-11	ENSG00000109971	3312	HSPA8
1125	179.977	-2.02824	0.14728	-6.98155	2.91948e-12	6.3487e-11	ENSG00000147883	1030	CDKN2B
1126	62.6092	5.72762	0.67748	6.97824	2.98907e-12	6.49424e-11	ENSG00000164266	6690	SPINK1
1127	109.214	-3.46134	0.352832	-6.97597	3.03776e-12	6.59415e-11	ENSG00000148848	8038	ADAM12
1128	342.797	-1.88167	0.126393	-6.97561	3.04556e-12	6.6052e-11	ENSG00000099204	3983	ABLIM1
1129	387.325	-1.71434	0.102409	-6.97536	3.05098e-12	6.61108e-11	ENSG00000137802	23005	MAPKBP1
1130	3249.1	-1.7077	0.101499	-6.97253	3.11301e-12	6.73952e-11	ENSG00000182718	302	ANXA2
1131	713.541	1.69651	0.0999025	6.97185	3.12803e-12	6.76603e-11	ENSG00000181788	6478	SIAH2
1132	51.8175	-3.01799	0.290125	-6.9556	3.51074e-12	7.58711e-11	ENSG00000069702	7049	TGFBR3
1133	1608.68	-1.60479	0.0870361	-6.94872	3.68612e-12	7.95909e-11	ENSG00000050820	9564	BCAR1
1134	54.6189	4.3101	0.476465	6.94722	3.72563e-12	8.03729e-11	ENSG00000224273	NA	RABGEF1P3
1135	359.547	1.91887	0.132313	6.94463	3.7944e-12	8.17841e-11	ENSG00000260916	9236	CCPG1
1136	1159.64	1.61931	0.0891821	6.94432	3.80282e-12	8.18932e-11	ENSG00000041802	NA	LSG1
1137	815.105	1.73268	0.105558	6.94095	3.89463e-12	8.37963e-11	ENSG00000066422	27107	ZBTB11
1138	401.966	-2.027	0.147974	-6.9404	3.91004e-12	8.40539e-11	ENSG00000132669	54453	RIN2
1139	166.998	2.27505	0.18379	6.93754	3.99e-12	8.56973e-11	ENSG00000164542	23366	KIAA0895
1140	772.378	1.67276	0.0969886	6.93653	4.0184e-12	8.62313e-11	ENSG00000184967	79050	NOC4L
1141	703.244	1.72481	0.104499	6.93605	4.03202e-12	8.64476e-11	ENSG00000173545	NA	ZNF622
1142	119.772	-2.36803	0.197455	-6.92833	4.25839e-12	9.12207e-11	ENSG00000170523	3889	KRT83
1143	25.0973	-5.58457	0.661739	-6.92807	4.26631e-12	9.13103e-11	ENSG00000175093	NA	SPSB4
1144	1411.61	-1.74549	0.107648	-6.92526	4.35161e-12	9.30543e-11	ENSG00000183853	55243	KIRREL1
1145	249.583	2.08828	0.157259	6.92035	4.50526e-12	9.62556e-11	ENSG00000166971	64400	AKTIP
1146	142.917	2.35782	0.196226	6.9197	4.52601e-12	9.66142e-11	ENSG00000006432	4293	MAP3K9
1147	200.683	-1.9376	0.135553	-6.91683	4.61877e-12	9.85081e-11	ENSG00000170035	10477	UBE2E3
1148	569.68	1.72323	0.104664	6.91009	4.84354e-12	1.03212e-10	ENSG00000140598	79631	EFL1
1149	148.685	-4.22935	0.467684	-6.90498	5.0211e-12	1.06902e-10	ENSG00000261786	NA
1150	764.508	1.71847	0.104061	6.90434	5.04371e-12	1.0729e-10	ENSG00000197498	NA	RPF2
1151	5758.09	1.54586	0.0790886	6.90182	5.13405e-12	1.09116e-10	ENSG00000072364	27125	AFF4
1152	565.142	1.73696	0.106804	6.9001	5.19642e-12	1.10346e-10	ENSG00000261824	148189	LINC00662
1153	82.4845	-2.4664	0.212597	-6.89758	5.28962e-12	1.12227e-10	ENSG00000275714	8350	H3C1
1154	160.982	-2.03765	0.150469	-6.89609	5.34538e-12	1.13312e-10	ENSG00000133020	NA	MYH8
1155	75.4453	3.24516	0.3256	6.89544	5.36998e-12	1.13735e-10	ENSG00000273812	NA
1156	296.394	1.86288	0.125197	6.89216	5.49533e-12	1.16288e-10	ENSG00000196208	9687	GREB1
1157	60.9187	-2.86776	0.271165	-6.88789	5.66241e-12	1.1972e-10	ENSG00000100311	5155	PDGFB
1158	43.334	-3.33433	0.339026	-6.88538	5.76323e-12	1.21746e-10	ENSG00000244586	NA	WNT5A-AS1
1159	462.222	1.86463	0.12564	6.88182	5.90912e-12	1.2472e-10	ENSG00000131080	60401	EDA2R
1160	365.799	-1.71261	0.103587	-6.87938	6.01155e-12	1.26772e-10	ENSG00000116830	8458	TTF2
1161	42.9522	-3.08112	0.302589	-6.87771	6.08216e-12	1.2804e-10	ENSG00000241547	NA	ACTG1P20
1162	27.2534	-4.53632	0.514168	-6.87776	6.08009e-12	1.2804e-10	ENSG00000276107	NA	THBS1-IT1
1163	219.23	2.28659	0.187246	6.87113	6.36955e-12	1.33975e-10	ENSG00000163376	84541	KBTBD8
1164	89.7037	3.04129	0.297794	6.85471	7.14572e-12	1.50171e-10	ENSG00000131242	84440	RAB11FIP4
1165	2227.51	1.687	0.100237	6.85372	7.19554e-12	1.51088e-10	ENSG00000167962	90850	ZNF598
1166	33.0141	-3.69913	0.39391	-6.85215	7.27481e-12	1.52621e-10	ENSG00000116721	65121	PRAMEF1
1167	108.986	-2.33028	0.194265	-6.84777	7.50118e-12	1.57235e-10	ENSG00000264230	728113	ANXA8L1
1168	188.183	2.13199	0.165339	6.84651	7.56714e-12	1.58481e-10	ENSG00000204344	8859	STK19
1169	3359.62	-2.17839	0.172154	-6.84495	7.65046e-12	1.60089e-10	ENSG00000065534	4638	MYLK
1170	33.491	-3.4594	0.360221	-6.82746	8.64309e-12	1.80705e-10	ENSG00000196196	NA	HRCT1
1171	805.004	-1.76074	0.111453	-6.82562	8.75469e-12	1.82881e-10	ENSG00000107249	169792	GLIS3
1172	86.8939	3.13892	0.313427	6.82431	8.83517e-12	1.84405e-10	ENSG00000162551	249	ALPL
1173	954.703	1.79489	0.116524	6.82165	9.00024e-12	1.8769e-10	ENSG00000204186	57683	ZDBF2
1174	1139.23	1.63044	0.0924245	6.82118	9.02934e-12	1.88136e-10	ENSG00000132254	23647	ARFIP2
1175	88.2127	-2.52184	0.223114	-6.82091	9.04677e-12	1.88338e-10	ENSG00000274641	8348	H2BC17
1176	344.446	1.92748	0.136033	6.81807	9.22747e-12	1.91936e-10	ENSG00000163001	112942	CFAP36
1177	683.05	-1.89196	0.13088	-6.81506	9.42233e-12	1.95822e-10	ENSG00000156011	23362	PSD3
1178	72.2118	-2.64683	0.24175	-6.81214	9.61554e-12	1.99668e-10	ENSG00000281398	NA	SNHG4
1179	185.998	2.16575	0.171186	6.80981	9.77252e-12	2.02755e-10	ENSG00000140471	55180	LINS1
1180	68.8938	5.19727	0.617556	6.79657	1.07139e-11	2.22097e-10	ENSG00000103154	54550	NECAB2
1181	4688.53	-1.60105	0.0884549	-6.79502	1.08294e-11	2.24302e-10	ENSG00000038382	7204	TRIO
1182	392.357	1.85908	0.126585	6.78661	1.14799e-11	2.37572e-10	ENSG00000260404	NA
1183	816.98	1.70142	0.103453	6.78006	1.20126e-11	2.48386e-10	ENSG00000117036	2117	ETV3
1184	329.411	-1.81843	0.12082	-6.77392	1.25341e-11	2.58951e-10	ENSG00000029153	56938	ARNTL2
1185	777.455	-1.58347	0.0862296	-6.76642	1.32004e-11	2.72485e-10	ENSG00000169764	7360	UGP2
1186	915.63	1.6061	0.0896356	6.76184	1.36254e-11	2.81019e-10	ENSG00000135249	60561	RINT1
1187	201.704	2.29918	0.192185	6.76003	1.37966e-11	2.84311e-10	ENSG00000237268	NA
1188	415.01	1.76184	0.112717	6.75889	1.39049e-11	2.863e-10	ENSG00000133316	54663	WDR74
1189	71.2275	-2.53539	0.227211	-6.75758	1.40314e-11	2.88661e-10	ENSG00000163545	81788	NUAK2
1190	2490.63	1.64727	0.0958406	6.7536	1.44222e-11	2.96451e-10	ENSG00000005700	25998	IBTK
1191	421.08	-1.73348	0.10866	-6.75026	1.47576e-11	3.03089e-10	ENSG00000162337	4041	LRP5
1192	859.946	-1.54377	0.0805779	-6.74843	1.4945e-11	3.0668e-10	ENSG00000134030	9811	CTIF
1193	111.333	-2.29576	0.192019	-6.74808	1.49819e-11	3.0718e-10	ENSG00000162520	81493	SYNC
1194	263.602	1.95819	0.142054	6.74524	1.52778e-11	3.12983e-10	ENSG00000156958	2585	GALK2
1195	64.559	-2.85659	0.275285	-6.74424	1.53831e-11	3.14876e-10	ENSG00000137273	2295	FOXF2
1196	1235.42	1.54038	0.0802684	6.73214	1.67185e-11	3.41786e-10	ENSG00000136718	92856	IMP4
1197	47.1915	-2.93566	0.287527	-6.73208	1.67258e-11	3.41786e-10	ENSG00000085276	2122	MECOM
1198	171.47	-2.12447	0.167048	-6.73145	1.67979e-11	3.42972e-10	ENSG00000117676	6195	RPS6KA1
1199	55.5909	-2.74686	0.259706	-6.72631	1.74015e-11	3.55e-10	ENSG00000115525	8869	ST3GAL5
1200	92.2113	2.80437	0.268342	6.72414	1.76636e-11	3.60045e-10	ENSG00000248498	389652	ASNSP1
1201	867.82	1.61818	0.0922961	6.69784	2.11521e-11	4.30792e-10	ENSG00000131013	85313	PPIL4
1202	215.892	-1.96181	0.143695	-6.6934	2.18047e-11	4.43713e-10	ENSG00000112640	5528	PPP2R5D
1203	1138.55	1.66742	0.0997369	6.69184	2.20376e-11	4.48081e-10	ENSG00000269821	10984	KCNQ1OT1
1204	221.275	2.17417	0.175475	6.69135	2.21117e-11	4.49211e-10	ENSG00000213199	9311	ASIC3
1205	1020.05	-1.76374	0.114203	-6.68754	2.26957e-11	4.60692e-10	ENSG00000129474	84962	AJUBA
1206	67.984	-4.3937	0.507561	-6.68629	2.28893e-11	4.64235e-10	ENSG00000280435	NA
1207	894.801	1.62726	0.0938227	6.68563	2.29935e-11	4.65962e-10	ENSG00000121073	10237	SLC35B1
1208	248.321	-1.88455	0.132442	-6.67875	2.40984e-11	4.87948e-10	ENSG00000080839	5933	RBL1
1209	124.781	-2.22093	0.182833	-6.67785	2.42481e-11	4.90571e-10	ENSG00000069011	5307	PITX1
1210	84.7228	2.78574	0.267501	6.67563	2.46174e-11	4.97631e-10	ENSG00000130707	445	ASS1
1211	1814.02	-1.5384	0.0806976	-6.67185	2.52594e-11	5.10186e-10	ENSG00000075340	119	ADD2
1212	625.592	1.81514	0.12229	6.66563	2.63533e-11	5.31841e-10	ENSG00000177150	125228	FAM210A
1213	328.399	1.92364	0.13857	6.66547	2.63821e-11	5.3198e-10	ENSG00000278318	7772	ZNF229
1214	117.398	-2.2539	0.188173	-6.66352	2.67337e-11	5.38626e-10	ENSG00000185909	200942	KLHDC8B
1215	157.453	-1.9989	0.149959	-6.66119	2.71619e-11	5.46802e-10	ENSG00000129195	54478	PIMREG
1216	724.961	-1.5637	0.0846517	-6.65901	2.75674e-11	5.54507e-10	ENSG00000149782	5331	PLCB3
1217	591.408	1.66957	0.100587	6.65662	2.80192e-11	5.63131e-10	ENSG00000141084	57610	RANBP10
1218	193.077	2.08042	0.162341	6.65523	2.82858e-11	5.68022e-10	ENSG00000115423	1768	DNAH6
1219	878.192	-1.71225	0.107074	-6.65197	2.89203e-11	5.80284e-10	ENSG00000122966	11113	CIT
1220	1554.13	-1.52501	0.0789322	-6.65146	2.90194e-11	5.81795e-10	ENSG00000100403	NA	ZC3H7B
1221	1067.31	1.62577	0.0940958	6.6504	2.92301e-11	5.85537e-10	ENSG00000160445	10444	ZER1
1222	395.563	-2.01659	0.152873	-6.6499	2.933e-11	5.87058e-10	ENSG00000065325	9340	GLP2R
1223	828.688	1.66193	0.0995547	6.6489	2.95299e-11	5.90574e-10	ENSG00000168397	23192	ATG4B
1224	33.9908	-3.43887	0.367102	-6.64358	3.06148e-11	6.11769e-10	ENSG00000106789	7464	CORO2A
1225	53.4428	-2.8074	0.272126	-6.64179	3.099e-11	6.18761e-10	ENSG00000175600	79783	SUGCT
1226	1091.01	1.64087	0.0965049	6.64077	3.12048e-11	6.2254e-10	ENSG00000157259	57798	GATAD1
1227	463.497	1.82067	0.123636	6.6378	3.18403e-11	6.34699e-10	ENSG00000124313	23096	IQSEC2
1228	25.1435	-3.7846	0.419525	-6.6375	3.19054e-11	6.35477e-10	ENSG00000162745	25903	OLFML2B
1229	304.524	-1.8773	0.132253	-6.63354	3.27732e-11	6.52229e-10	ENSG00000241476	6757	SSX2
1230	468.956	-1.85926	0.129669	-6.62658	3.43543e-11	6.83139e-10	ENSG00000162522	57648	KIAA1522
1231	49.2611	-2.93601	0.292352	-6.62217	3.53961e-11	7.02829e-10	ENSG00000033122	57554	LRRC7
1232	57.4263	3.21303	0.334186	6.62215	3.54021e-11	7.02829e-10	ENSG00000212710	64693	CTAGE1
1233	90.9761	-2.29653	0.195807	-6.62147	3.55635e-11	7.05459e-10	ENSG00000157870	127281	PRXL2B
1234	30894.2	-1.47506	0.0717715	-6.61904	3.61549e-11	7.16606e-10	ENSG00000196924	2316	FLNA
1235	207.479	-1.91135	0.13775	-6.61594	3.69192e-11	7.31163e-10	ENSG00000101825	NA	MXRA5
1236	528.73	-1.75264	0.113817	-6.61273	3.77307e-11	7.46627e-10	ENSG00000242125	8420	SNHG3
1237	132.071	-2.12547	0.170257	-6.61041	3.83257e-11	7.57787e-10	ENSG00000188290	57801	HES4
1238	54.4643	3.43727	0.368723	6.61002	3.84279e-11	7.59191e-10	ENSG00000214814	654463	FER1L6
1239	1021.37	1.59198	0.0896281	6.60482	3.97994e-11	7.85652e-10	ENSG00000164631	7559	ZNF12
1240	637.811	1.74274	0.112715	6.58956	4.41136e-11	8.70112e-10	ENSG00000132376	51763	INPP5K
1241	1013.74	-1.82267	0.124902	-6.58651	4.50273e-11	8.87415e-10	ENSG00000034510	9168	TMSB10
1242	1078.92	-2.22118	0.185426	-6.58582	4.52395e-11	8.90879e-10	ENSG00000177565	79718	TBL1XR1
1243	414.828	-1.78205	0.118771	-6.58451	4.56376e-11	8.97994e-10	ENSG00000105854	5445	PON2
1244	62.4837	3.04226	0.310361	6.58027	4.69588e-11	9.23245e-10	ENSG00000105499	8605	PLA2G4C
1245	60.6142	8.84636	1.1935	6.57423	4.8906e-11	9.60755e-10	ENSG00000105550	26291	FGF21
1246	1820.24	1.58691	0.0893667	6.56745	5.11847e-11	1.00392e-09	ENSG00000197150	11194	ABCB8
1247	1095.34	-1.67119	0.1022	-6.56745	5.11854e-11	1.00392e-09	ENSG00000139324	160418	TMTC3
1248	56.6749	3.69277	0.41008	6.56645	5.15301e-11	1.00986e-09	ENSG00000271525	NA	ARF4P1
1249	59.2862	-2.69767	0.2587	-6.56231	5.29813e-11	1.03747e-09	ENSG00000106123	2051	EPHB6
1250	471.791	-2.69387	0.258606	-6.54998	5.75443e-11	1.12592e-09	ENSG00000125398	6662	SOX9
1251	1206.03	1.67215	0.102636	6.54887	5.79727e-11	1.13249e-09	ENSG00000012171	7869	SEMA3B
1252	51.6653	3.42484	0.370265	6.54894	5.79488e-11	1.13249e-09	ENSG00000260923	NA	LINC02193
1253	52.0737	5.42785	0.676445	6.54576	5.91926e-11	1.15539e-09	ENSG00000004838	51364	ZMYND10
1254	283.482	-1.89944	0.137429	-6.5448	5.95749e-11	1.16193e-09	ENSG00000011201	NA	ANOS1
1255	833.947	1.59885	0.0915419	6.54178	6.07914e-11	1.1847e-09	ENSG00000158636	56946	EMSY
1256	174.752	-2.01198	0.154727	-6.54042	6.13472e-11	1.19458e-09	ENSG00000106785	9830	TRIM14
1257	364.788	1.84041	0.12851	6.53965	6.16645e-11	1.1998e-09	ENSG00000100376	55007	FAM118A
1258	170.635	-1.91009	0.139188	-6.53858	6.21066e-11	1.20744e-09	ENSG00000050438	9498	SLC4A8
1259	972.144	1.61933	0.0947246	6.53827	6.2235e-11	1.20898e-09	ENSG00000110768	2965	GTF2H1
1260	1122.77	1.52386	0.0801548	6.53564	6.33386e-11	1.22943e-09	ENSG00000140650	NA	PMM2
1261	24.0994	-4.04308	0.465688	-6.53458	6.37896e-11	1.2372e-09	ENSG00000213412	NA	HNRNPA1P33
1262	22.7477	-4.86251	0.591572	-6.52924	6.61043e-11	1.28108e-09	ENSG00000257167	100128191	TMPO-AS1
1263	52.0535	-2.78573	0.273576	-6.52737	6.69361e-11	1.29617e-09	ENSG00000289586	NA
1264	26.4051	-3.62827	0.402914	-6.52315	6.88454e-11	1.33208e-09	ENSG00000122367	11155	LDB3
1265	79.8848	2.73934	0.266918	6.5164	7.2014e-11	1.39229e-09	ENSG00000197405	728	C5AR1
1266	21.1552	-5.12369	0.633012	-6.5144	7.29791e-11	1.40983e-09	ENSG00000212724	730755	KRTAP2-3
1267	278.638	-1.84317	0.129442	-6.5139	7.32256e-11	1.41347e-09	ENSG00000175573	83638	C11orf68
1268	50.4813	-2.74191	0.267509	-6.5116	7.43525e-11	1.43409e-09	ENSG00000287064	NA
1269	78.3602	8.78896	1.19666	6.50892	7.56944e-11	1.45882e-09	ENSG00000137090	1761	DMRT1
1270	263.39	2.00741	0.15493	6.50236	7.90678e-11	1.52263e-09	ENSG00000153714	NA	LURAP1L
1271	838.821	-1.57881	0.0891342	-6.49368	8.37628e-11	1.61177e-09	ENSG00000012232	2137	EXTL3
1272	294.485	1.90821	0.13993	6.49044	8.55859e-11	1.64556e-09	ENSG00000085274	55892	MYNN
1273	146.92	-2.18528	0.182809	-6.48371	8.94922e-11	1.71931e-09	ENSG00000177614	NA	PGBD5
1274	331.523	1.83033	0.128074	6.4832	8.97995e-11	1.72385e-09	ENSG00000162642	148423	C1orf52
1275	1782.43	1.56732	0.0875401	6.48068	9.13082e-11	1.75144e-09	ENSG00000070081	4925	NUCB2
1276	137.575	-2.21289	0.187246	-6.47751	9.32484e-11	1.78725e-09	ENSG00000157240	8321	FZD1
1277	635.756	1.65049	0.100426	6.4773	9.33757e-11	1.78828e-09	ENSG00000197077	85379	KIAA1671
1278	1792.05	1.53829	0.0831157	6.47642	9.39249e-11	1.79739e-09	ENSG00000183431	10946	SF3A3
1279	117.89	7.6918	1.03344	6.47527	9.46434e-11	1.80972e-09	ENSG00000145113	4585	MUC4
1280	206.871	1.98733	0.152517	6.47358	9.57096e-11	1.82868e-09	ENSG00000134262	10717	AP4B1
1281	311.385	-1.84391	0.130477	-6.46786	9.94015e-11	1.89773e-09	ENSG00000184900	6612	SUMO3
1282	89.4847	-2.36218	0.210851	-6.46039	1.04434e-10	1.99212e-09	ENSG00000120162	79817	MOB3B
1283	18048.7	1.48886	0.075671	6.46028	1.04509e-10	1.99212e-09	ENSG00000166598	7184	HSP90B1
1284	314.355	-2.02059	0.158064	-6.45681	1.06934e-10	2.03675e-09	ENSG00000090975	57605	PITPNM2
1285	326.909	-1.81098	0.125622	-6.45572	1.07709e-10	2.04991e-09	ENSG00000146828	56996	SLC12A9
1286	660.491	-1.7821	0.121196	-6.45313	1.09564e-10	2.0836e-09	ENSG00000076356	5362	PLXNA2
1287	220.606	-1.88628	0.137372	-6.45167	1.10622e-10	2.10208e-09	ENSG00000153814	221895	JAZF1
1288	165.209	2.18586	0.183811	6.45152	1.10731e-10	2.10251e-09	ENSG00000267002	NA
1289	497.414	1.71026	0.1101	6.4511	1.1104e-10	2.10674e-09	ENSG00000157181	54953	ODR4
1290	205.9	2.08424	0.168074	6.45096	1.11146e-10	2.10711e-09	ENSG00000163138	133015	PACRGL
1291	205.97	-1.93157	0.144519	-6.44599	1.14847e-10	2.17558e-09	ENSG00000111665	83461	CDCA3
1292	233.933	1.968	0.150227	6.44355	1.16713e-10	2.20921e-09	ENSG00000205485	100133091
1293	153.68	-2.29431	0.20094	-6.44129	1.18461e-10	2.24056e-09	ENSG00000156920	139378	ADGRG4
1294	125.297	-2.15734	0.179799	-6.43685	1.2198e-10	2.30535e-09	ENSG00000029993	3149	HMGB3
1295	960.863	-1.59318	0.0921605	-6.43634	1.22391e-10	2.31132e-09	ENSG00000104812	2997	GYS1
1296	167.5	-2.05437	0.164079	-6.42599	1.31017e-10	2.4723e-09	ENSG00000145990	54438	GFOD1
1297	565.083	1.70293	0.109395	6.42557	1.31379e-10	2.47722e-09	ENSG00000214176	NA	PLEKHM1P1
1298	551.834	1.77535	0.120737	6.4218	1.34673e-10	2.53736e-09	ENSG00000158467	23382	AHCYL2
1299	466.387	-1.66822	0.104081	-6.42021	1.36088e-10	2.56205e-09	ENSG00000165801	55701	ARHGEF40
1300	209.069	-1.84233	0.131247	-6.4179	1.38165e-10	2.59914e-09	ENSG00000072210	224	ALDH3A2
1301	1125.45	1.54745	0.0853336	6.41538	1.40469e-10	2.64045e-09	ENSG00000066654	55623	THUMPD1
1302	1204.35	1.5179	0.0807806	6.41123	1.44351e-10	2.71133e-09	ENSG00000188636	NA	RTL6
1303	223.286	1.93382	0.145657	6.41109	1.44484e-10	2.71174e-09	ENSG00000187801	65243	ZFP69B
1304	63.5251	3.14144	0.334339	6.40499	1.5038e-10	2.82023e-09	ENSG00000184185	3768	KCNJ12
1305	2004.29	1.5101	0.0796651	6.40301	1.52343e-10	2.85485e-09	ENSG00000106344	55131	RBM28
1306	150.135	-2.1452	0.179001	-6.39775	1.57683e-10	2.95265e-09	ENSG00000112208	NA	BAG2
1307	283.382	-1.81131	0.126997	-6.38841	1.67621e-10	3.13634e-09	ENSG00000135622	10505	SEMA4F
1308	2387.48	1.50356	0.0788412	6.38701	1.69156e-10	3.16264e-09	ENSG00000213699	NA	SLC35F6
1309	61.5522	-2.58101	0.247682	-6.38322	1.73408e-10	3.23964e-09	ENSG00000132016	79173	BRME1
1310	122.061	-2.42929	0.224165	-6.37607	1.81691e-10	3.3918e-09	ENSG00000119681	4053	LTBP2
1311	108.613	-2.20722	0.189482	-6.37115	1.87617e-10	3.49975e-09	ENSG00000058056	8975	USP13
1312	1092.06	1.75565	0.11863	6.36979	1.89288e-10	3.52822e-09	ENSG00000145050	7873	MANF
1313	1942.08	1.52501	0.0824467	6.36781	1.91741e-10	3.57121e-09	ENSG00000113384	64083	GOLPH3
1314	179.921	-1.91288	0.143391	-6.36634	1.9359e-10	3.60289e-09	ENSG00000123737	5393	EXOSC9
1315	247.815	1.91436	0.14367	6.3643	1.96186e-10	3.64842e-09	ENSG00000121671	1408	CRY2
1316	76.8288	2.86743	0.293632	6.35976	2.02074e-10	3.75506e-09	ENSG00000105792	79846	CFAP69
1317	446.953	-1.89142	0.140182	-6.35904	2.03024e-10	3.76985e-09	ENSG00000157657	114991	ZNF618
1318	109.945	2.35957	0.213977	6.35381	2.10042e-10	3.89719e-09	ENSG00000257704	255783	INAFM1
1319	50.9088	-2.81074	0.285346	-6.34576	2.21325e-10	4.10343e-09	ENSG00000172346	NA	CSDC2
1320	239.995	-3.4917	0.392954	-6.34096	2.28338e-10	4.23024e-09	ENSG00000101665	4092	SMAD7
1321	72.4304	-2.71637	0.270746	-6.33942	2.30633e-10	4.26952e-09	ENSG00000275221	8330	H2AC15
1322	103.755	-2.32878	0.209665	-6.33763	2.33322e-10	4.31601e-09	ENSG00000049246	8863	PER3
1323	477.703	-3.34598	0.37026	-6.33603	2.35758e-10	4.35778e-09	ENSG00000095752	3589	IL11
1324	192.176	-1.85561	0.135044	-6.33577	2.36157e-10	4.36184e-09	ENSG00000076248	7374	UNG
1325	532.204	1.7587	0.119763	6.33505	2.37268e-10	4.37904e-09	ENSG00000084072	10450	PPIE
1326	1425.27	1.5483	0.0865681	6.33368	2.39375e-10	4.41459e-09	ENSG00000138592	9101	USP8
1327	822.594	1.62938	0.099412	6.33105	2.43503e-10	4.48734e-09	ENSG00000146278	10957	PNRC1
1328	108.054	-2.09259	0.172583	-6.33085	2.43812e-10	4.48964e-09	ENSG00000101003	9837	GINS1
1329	53.9219	4.50393	0.553543	6.33001	2.45138e-10	4.51065e-09	ENSG00000169302	202374	STK32A
1330	35.3445	-3.35651	0.37235	-6.32874	2.47165e-10	4.54452e-09	ENSG00000077092	5915	RARB
1331	162.085	2.09471	0.173	6.32784	2.48625e-10	4.56792e-09	ENSG00000198046	63934	ZNF667
1332	415.919	1.68977	0.109067	6.32423	2.54499e-10	4.67232e-09	ENSG00000116977	3964	LGALS8
1333	510.634	-1.90356	0.142984	-6.31929	2.62767e-10	4.82048e-09	ENSG00000135111	6926	TBX3
1334	173.88	-1.96406	0.152567	-6.31892	2.63402e-10	4.82851e-09	ENSG00000268447	727837	SSX2B
1335	28.3178	-3.41807	0.382753	-6.31757	2.6571e-10	4.86716e-09	ENSG00000253123	100507403
1336	4942.97	1.48071	0.0761208	6.31514	2.69921e-10	4.94058e-09	ENSG00000184575	11260	XPOT
1337	1133.06	1.60512	0.0958761	6.31143	2.76469e-10	5.05665e-09	ENSG00000185043	10519	CIB1
1338	401.448	-1.73902	0.117169	-6.30729	2.83973e-10	5.19e-09	ENSG00000156504	159090	PABIR2
1339	491.895	-1.81543	0.129293	-6.30679	2.84881e-10	5.2027e-09	ENSG00000254332	NA
1340	92.9941	2.59906	0.253742	6.30192	2.93981e-10	5.36487e-09	ENSG00000267265	NA	GP6-AS1
1341	452.521	1.78025	0.123831	6.30095	2.95833e-10	5.39464e-09	ENSG00000111364	57696	DDX55
1342	310.992	-1.8072	0.128158	-6.29845	3.00629e-10	5.478e-09	ENSG00000181588	399664	MEX3D
1343	3238.85	-1.50868	0.0807696	-6.29793	3.01637e-10	5.49227e-09	ENSG00000024422	30846	EHD2
1344	149.644	-2.17105	0.186073	-6.29349	3.10403e-10	5.64766e-09	ENSG00000142279	126374	WTIP
1345	36.0101	-3.07032	0.329158	-6.28973	3.18028e-10	5.7821e-09	ENSG00000171388	8862	APLN
1346	91.7252	-2.31544	0.209169	-6.28889	3.1974e-10	5.80889e-09	ENSG00000153721	154043	CNKSR3
1347	139.439	-1.95798	0.152332	-6.28877	3.19981e-10	5.80894e-09	ENSG00000088756	79822	ARHGAP28
1348	228.636	-2.86222	0.296271	-6.28556	3.26684e-10	5.92621e-09	ENSG00000112773	55603	TENT5A
1349	166.636	2.13071	0.17995	6.28348	3.31084e-10	6.00157e-09	ENSG00000169239	11238	CA5B
1350	1413.69	-1.64699	0.102974	-6.28303	3.32038e-10	6.01439e-09	ENSG00000065054	9351	SLC9A3R2
1351	249.767	-1.7629	0.121527	-6.2776	3.4385e-10	6.22374e-09	ENSG00000123364	NA	HOXC13
1352	911.906	-1.70965	0.113092	-6.27493	3.4979e-10	6.32655e-09	ENSG00000182985	23705	CADM1
1353	66.0642	-2.76711	0.281683	-6.27341	3.53214e-10	6.38375e-09	ENSG00000273706	3975	LHX1
1354	398.371	-2.37177	0.218773	-6.27029	3.60371e-10	6.50347e-09	ENSG00000255248	399959	MIR100HG
1355	254.872	1.93204	0.148642	6.27037	3.60197e-10	6.50347e-09	ENSG00000083812	25799	ZNF324
1356	201.783	-1.86145	0.137454	-6.26719	3.67617e-10	6.62934e-09	ENSG00000126351	7067	THRA
1357	393.759	-1.86795	0.138523	-6.26572	3.71106e-10	6.68732e-09	ENSG00000184661	157313	CDCA2
1358	496.444	-1.72872	0.116307	-6.26551	3.716e-10	6.69126e-09	ENSG00000148143	NA	ZNF462
1359	23.5085	-4.31839	0.529678	-6.26493	3.73003e-10	6.71158e-09	ENSG00000272695	100506394	GAS6-DT
1360	504.71	-1.75712	0.120926	-6.261	3.82506e-10	6.8775e-09	ENSG00000275216	NA
1361	374.179	-1.74076	0.118337	-6.2598	3.8548e-10	6.92587e-09	ENSG00000235162	387882	C12orf75
1362	21.7723	-4.18182	0.50845	-6.25789	3.90224e-10	7.00594e-09	ENSG00000128262	29774	POM121L9P
1363	120.342	2.3257	0.211859	6.25746	3.91308e-10	7.02024e-09	ENSG00000112651	51069	MRPL2
1364	300.731	1.90059	0.144157	6.24726	4.17715e-10	7.48848e-09	ENSG00000106404	24146	CLDN15
1365	140.671	-2.04149	0.166945	-6.23854	4.41682e-10	7.91234e-09	ENSG00000142698	84970	C1orf94
1366	118.015	-2.13647	0.182306	-6.23389	4.55006e-10	8.14505e-09	ENSG00000162636	284611	FAM102B
1367	228.988	-1.87832	0.140905	-6.23343	4.56335e-10	8.16285e-09	ENSG00000081026	260425	MAGI3
1368	774.608	1.66259	0.106303	6.233	4.57587e-10	8.17326e-09	ENSG00000102100	7355	SLC35A2
1369	368.587	1.82858	0.132932	6.2331	4.5729e-10	8.17326e-09	ENSG00000205918	NA	PDPK2P
1370	1210.28	-1.56679	0.0909957	-6.22874	4.70212e-10	8.39261e-09	ENSG00000008256	9265	CYTH3
1371	543.722	1.68327	0.109785	6.22376	4.85376e-10	8.65694e-09	ENSG00000165355	254170	FBXO33
1372	91.6535	-2.18862	0.191066	-6.22097	4.9409e-10	8.80592e-09	ENSG00000250992	NA
1373	589.305	1.60354	0.0970317	6.22004	4.97027e-10	8.8518e-09	ENSG00000104228	23087	TRIM35
1374	120.952	2.38721	0.223142	6.21671	5.07699e-10	9.03527e-09	ENSG00000166793	219539	YPEL4
1375	50.164	3.37326	0.381786	6.21622	5.09277e-10	9.05675e-09	ENSG00000123329	64333	ARHGAP9
1376	112.399	-2.19025	0.191733	-6.20784	5.37166e-10	9.54574e-09	ENSG00000186871	54821	ERCC6L
1377	290.474	-1.79744	0.128467	-6.20736	5.38814e-10	9.56806e-09	ENSG00000162783	51278	IER5
1378	346.045	1.85593	0.137905	6.20661	5.41388e-10	9.60679e-09	ENSG00000147799	80728	ARHGAP39
1379	51.7799	4.12762	0.503991	6.20572	5.44482e-10	9.65467e-09	ENSG00000261949	100507003	GFY
1380	744.337	1.69647	0.112253	6.20451	5.48688e-10	9.72217e-09	ENSG00000068903	22933	SIRT2
1381	248.85	-2.55312	0.250471	-6.20082	5.61701e-10	9.94554e-09	ENSG00000067798	89795	NAV3
1382	2329.59	1.48093	0.0775844	6.19881	5.68915e-10	1.0066e-08	ENSG00000025796	11231	SEC63
1383	716.052	-1.62813	0.101388	-6.1953	5.81728e-10	1.02852e-08	ENSG00000072657	29953	TRHDE
1384	76.414	3.11384	0.341266	6.19411	5.86154e-10	1.0356e-08	ENSG00000130829	1852	DUSP9
1385	136.933	-2.28411	0.207347	-6.19304	5.90142e-10	1.04189e-08	ENSG00000165757	57608	JCAD
1386	1885.57	-1.52487	0.0847669	-6.19191	5.94386e-10	1.04862e-08	ENSG00000142949	5792	PTPRF
1387	1034.71	-2.62927	0.263275	-6.18848	6.07479e-10	1.07094e-08	ENSG00000144824	90102	PHLDB2
1388	268.015	-1.81455	0.131661	-6.18672	6.14279e-10	1.08215e-08	ENSG00000235655	NA	H3P6
1389	637.233	-1.6848	0.110718	-6.18505	6.20842e-10	1.09292e-08	ENSG00000128487	92521	SPECC1
1390	1212.31	1.47594	0.0769666	6.18372	6.26079e-10	1.10135e-08	ENSG00000145740	64924	SLC30A5
1391	53.872	-2.54042	0.249344	-6.17786	6.49744e-10	1.14215e-08	ENSG00000250899	NA
1392	676.78	1.6091	0.0986666	6.17334	6.68615e-10	1.17448e-08	ENSG00000109534	54433	GAR1
1393	67.2523	2.8816	0.304811	6.17299	6.70118e-10	1.17627e-08	ENSG00000163611	152185	SPICE1
1394	29.1698	-3.28041	0.369652	-6.16908	6.86896e-10	1.20486e-08	ENSG00000272512	NA
1395	522.996	1.68874	0.111674	6.16738	6.94319e-10	1.217e-08	ENSG00000006025	114881	OSBPL7
1396	399.222	-1.62905	0.10201	-6.16654	6.98006e-10	1.22259e-08	ENSG00000147130	9203	ZMYM3
1397	907.901	-1.65768	0.106732	-6.16198	7.18388e-10	1.25738e-08	ENSG00000198947	1756	DMD
1398	60.6023	-2.74253	0.283151	-6.15406	7.55224e-10	1.32091e-08	ENSG00000198573	64663	SPANXC
1399	110.405	-2.08146	0.175746	-6.15355	7.57671e-10	1.32424e-08	ENSG00000188985	NA	DHFRP1
1400	503.292	1.70564	0.114686	6.15282	7.61168e-10	1.3294e-08	ENSG00000273559	NA	CWC25
1401	108.201	-2.21629	0.197747	-6.15073	7.71272e-10	1.34609e-08	ENSG00000227234	NA	SPANXB1
1402	1099.45	1.56574	0.0920814	6.1439	8.05195e-10	1.40429e-08	ENSG00000076924	56949	XAB2
1403	505.648	-1.64403	0.104867	-6.14138	8.18073e-10	1.42573e-08	ENSG00000183741	23466	CBX6
1404	239.431	-1.84223	0.137248	-6.13659	8.43134e-10	1.46835e-08	ENSG00000144677	10217	CTDSPL
1405	678.703	-2.23492	0.201485	-6.12908	8.83913e-10	1.53827e-08	ENSG00000168906	4144	MAT2A
1406	19.2378	-5.81802	0.786259	-6.12778	8.9113e-10	1.54973e-08	ENSG00000178031	92949	ADAMTSL1
1407	480.886	-2.74014	0.284109	-6.12489	9.07449e-10	1.57698e-08	ENSG00000049130	4254	KITLG
1408	1513.8	1.57028	0.0931326	6.12336	9.16218e-10	1.59109e-08	ENSG00000115486	2677	GGCX
1409	305.603	1.93655	0.152983	6.12192	9.24543e-10	1.6044e-08	ENSG00000189114	388552	BLOC1S3
1410	723.816	-1.62597	0.102255	-6.12166	9.26075e-10	1.60592e-08	ENSG00000130749	23211	ZC3H4
1411	779.377	-1.59383	0.0970206	-6.12066	9.31868e-10	1.61482e-08	ENSG00000115159	2820	GPD2
1412	84.0376	2.44483	0.236118	6.11911	9.40989e-10	1.62947e-08	ENSG00000130775	9473	THEMIS2
1413	43.9465	-2.78333	0.291446	-6.1189	9.42242e-10	1.63047e-08	ENSG00000149571	84623	KIRREL3
1414	549.991	1.67707	0.110654	6.11879	9.42903e-10	1.63047e-08	ENSG00000103494	23322	RPGRIP1L
1415	23.1491	-3.78446	0.455084	-6.11857	9.44208e-10	1.63157e-08	ENSG00000164093	5308	PITX2
1416	66.2962	-2.624	0.265815	-6.10953	9.99251e-10	1.72546e-08	ENSG00000203926	728712	SPANXA2
1417	83.3585	2.81226	0.296827	6.10545	1.02513e-09	1.7689e-08	ENSG00000080166	1638	DCT
1418	592.127	1.62027	0.101605	6.10469	1.03001e-09	1.77606e-08	ENSG00000040531	1497	CTNS
1419	45.2605	5.69004	0.768499	6.10285	1.04192e-09	1.79533e-08	ENSG00000167861	283987	HID1
1420	34.9374	-2.99897	0.327845	-6.09728	1.07889e-09	1.85771e-08	ENSG00000275016	NA
1421	50.8666	-6.06503	0.830872	-6.09604	1.08728e-09	1.86972e-08	ENSG00000105880	1749	DLX5
1422	2084.14	-1.44671	0.0732789	-6.09602	1.08739e-09	1.86972e-08	ENSG00000139645	283373	ANKRD52
1423	2827.52	1.45715	0.0750014	6.09522	1.09289e-09	1.87785e-08	ENSG00000115806	26003	GORASP2
1424	249.619	-1.83051	0.13628	-6.09415	1.10019e-09	1.88906e-08	ENSG00000183114	NA	FAM43B
1425	88.3453	-2.19292	0.195887	-6.08986	1.1301e-09	1.93905e-08	ENSG00000152217	26040	SETBP1
1426	222.007	1.97719	0.160626	6.08367	1.17459e-09	2.01397e-08	ENSG00000184194	54328	GPR173
1427	42.9294	3.41862	0.397577	6.08341	1.17655e-09	2.01592e-08	ENSG00000177757	400728	FAM87B
1428	60.988	-2.56521	0.257382	-6.08127	1.19237e-09	2.04159e-08	ENSG00000179046	205860	TRIML2
1429	975.452	1.58253	0.0957979	6.08079	1.19589e-09	2.04618e-08	ENSG00000105127	NA	AKAP8
1430	520.564	1.73379	0.120715	6.07871	1.21155e-09	2.07152e-08	ENSG00000111912	135112	NCOA7
1431	87.7663	2.59212	0.262167	6.07292	1.25608e-09	2.14615e-08	ENSG00000104213	5157	PDGFRL
1432	283.638	-1.86263	0.142071	-6.07181	1.26474e-09	2.15944e-08	ENSG00000169184	4330	MN1
1433	1164.32	-1.60995	0.10052	-6.06797	1.2954e-09	2.21025e-08	ENSG00000101871	4281	MID1
1434	1866.9	-1.49131	0.0809703	-6.06776	1.29705e-09	2.21151e-08	ENSG00000010292	NA	NCAPD2
1435	71.3663	-2.33372	0.219855	-6.06637	1.3083e-09	2.22913e-08	ENSG00000156675	80223	RAB11FIP1
1436	142.36	-3.36835	0.390443	-6.06581	1.31291e-09	2.23543e-08	ENSG00000152990	NA	ADGRA3
1437	295.614	1.74292	0.122509	6.06417	1.32641e-09	2.25683e-08	ENSG00000185022	23764	MAFF
1438	173.81	1.96511	0.159204	6.06206	1.34387e-09	2.28496e-08	ENSG00000111224	57097	PARP11
1439	2157.84	1.47084	0.0777165	6.05847	1.37419e-09	2.33487e-08	ENSG00000130254	9667	SAFB2
1440	31.086	-3.33992	0.386581	-6.05285	1.42302e-09	2.41616e-08	ENSG00000203706	NA	SERTAD4-AS1
1441	24.9515	-3.56496	0.424131	-6.04757	1.47044e-09	2.49495e-08	ENSG00000183840	NA	GPR39
1442	805.06	-1.50752	0.0839317	-6.04683	1.47726e-09	2.50478e-08	ENSG00000127589	NA	TUBBP1
1443	144.352	2.16094	0.192057	6.04478	1.49618e-09	2.53508e-08	ENSG00000079337	10411	RAPGEF3
1444	63.9907	-2.39616	0.231133	-6.04049	1.53645e-09	2.60151e-08	ENSG00000198324	144717	PHETA1
1445	39.1458	-2.98799	0.329199	-6.03887	1.55198e-09	2.626e-08	ENSG00000096092	28978	TMEM14A
1446	1134.04	1.50832	0.0841871	6.03793	1.56105e-09	2.6395e-08	ENSG00000160058	55108	BSDC1
1447	213.817	-1.93137	0.15431	-6.03566	1.58318e-09	2.67506e-08	ENSG00000070182	6710	SPTB
1448	69.4131	7.27006	1.03933	6.0328	1.61146e-09	2.72098e-08	ENSG00000122787	6718	AKR1D1
1449	236.921	-1.76237	0.126474	-6.02787	1.66138e-09	2.80332e-08	ENSG00000156026	90550	MCU
1450	960.344	1.59834	0.0993345	6.02351	1.70676e-09	2.87789e-08	ENSG00000077150	4791	NFKB2
1451	105.393	-2.12959	0.187773	-6.01574	1.79067e-09	3.01731e-08	ENSG00000276903	8332	H2AC16
1452	24.4211	-3.38292	0.396318	-6.01264	1.82531e-09	3.07355e-08	ENSG00000068615	65055	REEP1
1453	14659.5	-1.95545	0.158914	-6.01235	1.82856e-09	3.0769e-08	ENSG00000178209	5339	PLEC
1454	27.1748	-3.45895	0.409024	-6.01175	1.83535e-09	3.0862e-08	ENSG00000203721	554279	LINC00862
1455	51.2616	4.78486	0.629621	6.01133	1.84012e-09	3.09209e-08	ENSG00000215354	NA	FAM90A24P
1456	1882.82	-1.60466	0.100616	-6.0096	1.85986e-09	3.1231e-08	ENSG00000128641	4430	MYO1B
1457	85.5614	-2.21175	0.201717	-6.0072	1.88754e-09	3.16741e-08	ENSG00000115041	NA	KCNIP3
1458	274.489	-1.82645	0.137712	-6.0013	1.95745e-09	3.28247e-08	ENSG00000102302	NA	FGD1
1459	50.8083	-2.6967	0.282727	-6.00118	1.95892e-09	3.28266e-08	ENSG00000182261	338322	NLRP10
1460	965.261	1.69102	0.115155	6.00073	1.96429e-09	3.28941e-08	ENSG00000104946	79735	TBC1D17
1461	99.8857	-2.15676	0.192843	-5.99846	1.99192e-09	3.33339e-08	ENSG00000158163	199221	DZIP1L
1462	43.6189	-2.80957	0.301684	-5.99823	1.99474e-09	3.33582e-08	ENSG00000156239	29104	N6AMT1
1463	941.578	1.5372	0.0895626	5.99805	1.99698e-09	3.33729e-08	ENSG00000107625	79009	DDX50
1464	68.8577	2.85637	0.309608	5.99588	2.02386e-09	3.37988e-08	ENSG00000186409	728621	CCDC30
1465	366.317	-1.63122	0.10532	-5.99333	2.05586e-09	3.43098e-08	ENSG00000187741	2175	FANCA
1466	22.1211	-3.63038	0.438962	-5.99228	2.06914e-09	3.45077e-08	ENSG00000267886	NA
1467	542.037	1.65852	0.109914	5.99129	2.08187e-09	3.46963e-08	ENSG00000169826	55454	CSGALNACT2
1468	120.115	-2.0963	0.183015	-5.99023	2.09549e-09	3.48995e-08	ENSG00000106780	NA	MEGF9
1469	28.2958	-3.51718	0.420284	-5.98924	2.10818e-09	3.50869e-08	ENSG00000142623	29943	PADI1
1470	1580.35	1.46709	0.0780182	5.98698	2.13777e-09	3.55552e-08	ENSG00000145817	81555	YIPF5
1471	1061.19	1.57857	0.0967208	5.98185	2.20621e-09	3.66685e-08	ENSG00000174851	10897	YIF1A
1472	1388.38	1.52483	0.0878171	5.97635	2.28195e-09	3.79015e-08	ENSG00000155097	528	ATP6V1C1
1473	69.899	2.67484	0.280326	5.97462	2.30632e-09	3.82802e-08	ENSG00000140465	1543	CYP1A1
1474	267.269	1.86454	0.144762	5.97214	2.34156e-09	3.88387e-08	ENSG00000100058	1416	CRYBB2P1
1475	62.2029	-2.3681	0.229102	-5.97159	2.34948e-09	3.89436e-08	ENSG00000152253	57405	SPC25
1476	327.612	-1.87522	0.146609	-5.96978	2.37567e-09	3.93509e-08	ENSG00000157557	2114	ETS2
1477	31.843	-3.1943	0.36761	-5.96908	2.38588e-09	3.94933e-08	ENSG00000231764	NA	DLX6-AS1
1478	266.203	1.8107	0.135831	5.96841	2.39577e-09	3.96302e-08	ENSG00000269343	100293516	ZNF587B
1479	125.747	-1.97594	0.163525	-5.96812	2.4e-09	3.96732e-08	ENSG00000125657	8744	TNFSF9
1480	461.004	-1.65774	0.110233	-5.96676	2.42017e-09	3.99795e-08	ENSG00000162302	8986	RPS6KA4
1481	1083.8	-1.54556	0.0914744	-5.96403	2.46085e-09	4.0624e-08	ENSG00000119326	8727	CTNNAL1
1482	115.721	-2.25778	0.211075	-5.95893	2.53893e-09	4.18847e-08	ENSG00000180263	NA	FGD6
1483	424.463	1.71178	0.119449	5.95882	2.54069e-09	4.18853e-08	ENSG00000095574	64376	IKZF5
1484	168.698	-1.85062	0.14276	-5.95835	2.5479e-09	4.19758e-08	ENSG00000135414	10220	GDF11
1485	18.865	-4.08539	0.518214	-5.95388	2.61853e-09	4.31103e-08	ENSG00000242242	NA	NECTIN3-AS1
1486	196.991	-1.87148	0.146387	-5.95326	2.62849e-09	4.32452e-08	ENSG00000110888	65981	CAPRIN2
1487	380.718	-1.73396	0.123306	-5.95237	2.64286e-09	4.34523e-08	ENSG00000124920	745	MYRF
1488	1471.48	1.44632	0.0749947	5.9514	2.65864e-09	4.36823e-08	ENSG00000186866	23275	POFUT2
1489	1185.83	1.45444	0.0763814	5.94961	2.68775e-09	4.41309e-08	ENSG00000172432	54676	GTPBP2
1490	1291.33	1.57783	0.0971521	5.94773	2.7188e-09	4.46106e-08	ENSG00000100554	51382	ATP6V1D
1491	102.457	-2.24783	0.209804	-5.94761	2.72087e-09	4.46145e-08	ENSG00000166510	80323	CCDC68
1492	165.689	2.18193	0.198756	5.94664	2.73696e-09	4.48482e-08	ENSG00000181690	5324	PLAG1
1493	70.2315	2.70426	0.286612	5.94625	2.7435e-09	4.49253e-08	ENSG00000237868	NA
1494	699.933	-1.65488	0.110253	-5.9398	2.85376e-09	4.66994e-08	ENSG00000163110	10611	PDLIM5
1495	49.1171	-2.61593	0.272093	-5.93889	2.86964e-09	4.69278e-08	ENSG00000145882	78991	PCYOX1L
1496	4557.77	-1.57673	0.097164	-5.93568	2.92634e-09	4.7823e-08	ENSG00000135862	3915	LAMC1
1497	1596.13	1.58198	0.0981518	5.92938	3.04072e-09	4.9659e-08	ENSG00000179632	84232	MAF1
1498	177.784	-2.92624	0.324878	-5.92911	3.04582e-09	4.9709e-08	ENSG00000165434	283209	PGM2L1
1499	227.161	-2.05185	0.177633	-5.9215	3.1902e-09	5.20305e-08	ENSG00000183723	146223	CMTM4
1500	144.84	-2.03436	0.174772	-5.91836	3.25174e-09	5.29987e-08	ENSG00000176454	NA	LPCAT4
1501	79.4466	2.56546	0.264633	5.91561	3.30648e-09	5.3855e-08	ENSG00000256806	388327	C17orf100
1502	181.645	-1.9617	0.162699	-5.91093	3.40188e-09	5.53719e-08	ENSG00000166444	6764	DENND2B
1503	203.728	-1.80103	0.135604	-5.90712	3.48143e-09	5.6629e-08	ENSG00000234616	8629	JRK
1504	829.75	1.61162	0.103543	5.90688	3.48647e-09	5.66732e-08	ENSG00000104522	7264	GFUS
1505	39.397	-2.97434	0.334265	-5.90651	3.49436e-09	5.67635e-08	ENSG00000175793	2810	SFN
1506	503.11	-1.62237	0.105415	-5.90398	3.54836e-09	5.76025e-08	ENSG00000139350	121441	NEDD1
1507	735.772	1.59879	0.101447	5.90251	3.5802e-09	5.80807e-08	ENSG00000154144	84897	TBRG1
1508	314.518	-1.69508	0.117931	-5.89395	3.77067e-09	6.11299e-08	ENSG00000183722	10186	LHFPL6
1509	44.0456	3.60776	0.442618	5.89167	3.8232e-09	6.19404e-08	ENSG00000229431	NA	MED8-AS1
1510	626.65	1.60535	0.102753	5.89131	3.83143e-09	6.20325e-08	ENSG00000135709	9764	KIAA0513
1511	25.6196	-3.57857	0.438066	-5.88626	3.95043e-09	6.39168e-08	ENSG00000229563	101927528	LINC01204
1512	263.727	1.77436	0.131647	5.88213	4.05008e-09	6.54857e-08	ENSG00000115239	51130	ASB3
1513	263.727	1.77436	0.131647	5.88213	4.05008e-09	6.54857e-08	ENSG00000115239	100302652	ASB3
1514	22.4841	-3.99475	0.509212	-5.88115	4.07423e-09	6.58326e-08	ENSG00000223784	NA	LINP1
1515	1440.74	1.49065	0.0834408	5.88027	4.09604e-09	6.61412e-08	ENSG00000116580	54856	GON4L
1516	89.3133	-2.22905	0.209305	-5.87206	4.30419e-09	6.94563e-08	ENSG00000227295	NA	ELL2P1
1517	210.462	-1.87515	0.149042	-5.87183	4.3102e-09	6.95074e-08	ENSG00000134775	80206	FHOD3
1518	755.327	1.5659	0.0964273	5.86866	4.39328e-09	7.08003e-08	ENSG00000137824	55177	RMDN3
1519	613.479	1.65093	0.11095	5.8669	4.44029e-09	7.15106e-08	ENSG00000121931	55791	LRIF1
1520	148.82	-1.88199	0.150382	-5.86501	4.49116e-09	7.22822e-08	ENSG00000170085	375484	SIMC1
1521	73.6326	-2.24703	0.212874	-5.85806	4.68293e-09	7.5319e-08	ENSG00000160447	29941	PKN3
1522	198.623	1.94859	0.161976	5.85638	4.73077e-09	7.60382e-08	ENSG00000111801	10384	BTN3A3
1523	271.722	1.88292	0.150856	5.85269	4.83692e-09	7.76932e-08	ENSG00000181135	286075	ZNF707
1524	271.722	1.88292	0.150856	5.85269	4.83692e-09	7.76932e-08	ENSG00000181135	101928160	ZNF707
1525	63.749	-2.67328	0.285916	-5.85236	4.84642e-09	7.77946e-08	ENSG00000105889	256227	STEAP1B
1526	63.749	-2.67328	0.285916	-5.85236	4.84642e-09	7.77946e-08	ENSG00000105889	401312	STEAP1B
1527	36.9247	3.90299	0.496664	5.84499	5.06591e-09	8.12643e-08	ENSG00000163406	6565	SLC15A2
1528	218.792	1.95412	0.16329	5.8431	5.12369e-09	8.21373e-08	ENSG00000204514	730051	ZNF814
1529	57.888	-2.5909	0.272781	-5.83215	5.47175e-09	8.76019e-08	ENSG00000198890	55170	PRMT6
1530	258.254	-1.97643	0.16742	-5.83226	5.46822e-09	8.76019e-08	ENSG00000041353	5874	RAB27B
1531	45.5529	-2.64804	0.282696	-5.82972	5.55206e-09	8.87711e-08	ENSG00000155269	NA	GPR78
1532	127.073	-2.15344	0.197851	-5.82983	5.54851e-09	8.87711e-08	ENSG00000152495	814	CAMK4
1533	41.9838	-2.78727	0.306643	-5.8285	5.59285e-09	8.93648e-08	ENSG00000154556	8470	SORBS2
1534	25.6336	-3.32665	0.399279	-5.82712	5.63906e-09	9.00441e-08	ENSG00000250305	57604	TRMT9B
1535	64.8851	2.72531	0.296153	5.82574	5.68603e-09	9.07347e-08	ENSG00000168026	199223	TTC21A
1536	154.681	-1.8928	0.153266	-5.82512	5.70718e-09	9.10128e-08	ENSG00000148384	56623	INPP5E
1537	128.474	-2.92508	0.330556	-5.82376	5.75374e-09	9.16953e-08	ENSG00000253368	388610	TRNP1
1538	37.4889	5.03403	0.692726	5.82342	5.76571e-09	9.18261e-08	ENSG00000205927	10215	OLIG2
1539	135.064	-1.99053	0.170162	-5.82111	5.84572e-09	9.30396e-08	ENSG00000082126	58538	MPP4
1540	1097.98	1.56813	0.0976158	5.82011	5.88086e-09	9.35378e-08	ENSG00000162601	114803	MYSM1
1541	91.9656	-2.10213	0.189511	-5.81569	6.03845e-09	9.59818e-08	ENSG00000131737	3885	KRT34
1542	68.3467	2.70234	0.292776	5.81448	6.08242e-09	9.66178e-08	ENSG00000170909	126014	OSCAR
1543	253.248	-1.87011	0.149718	-5.81164	6.18621e-09	9.82026e-08	ENSG00000101220	54976	C20orf27
1544	53.7207	4.97179	0.683767	5.80869	6.29641e-09	9.98869e-08	ENSG00000229953	NA
1545	2216.22	1.44764	0.0771363	5.80323	6.50476e-09	1.03125e-07	ENSG00000151135	90488	TMEM263
1546	99.0761	-2.08721	0.187436	-5.80043	6.61433e-09	1.04794e-07	ENSG00000179958	79077	DCTPP1
1547	564.893	-2.2145	0.20944	-5.79878	6.67974e-09	1.05762e-07	ENSG00000137936	8412	BCAR3
1548	611.343	1.6316	0.108928	5.7983	6.69919e-09	1.06001e-07	ENSG00000182973	25904	CNOT10
1549	81.0617	-2.41956	0.24486	-5.79742	6.73443e-09	1.0649e-07	ENSG00000102287	2564	GABRE
1550	1163.74	1.57424	0.0991139	5.79371	6.88463e-09	1.08794e-07	ENSG00000111596	4848	CNOT2
1551	690.661	1.65731	0.113476	5.79251	6.93409e-09	1.09505e-07	ENSG00000129071	8930	MBD4
1552	279.267	-1.69135	0.119437	-5.78843	7.10492e-09	1.1213e-07	ENSG00000087448	57542	KLHL42
1553	1265.87	1.5357	0.0926085	5.7846	7.26854e-09	1.14638e-07	ENSG00000101310	10483	SEC23B
1554	96.8089	-2.04393	0.180615	-5.77987	7.476e-09	1.17834e-07	ENSG00000120833	8835	SOCS2
1555	1573.46	1.43523	0.0753193	5.7785	7.53694e-09	1.18718e-07	ENSG00000136986	79139	DERL1
1556	100.515	-2.19936	0.207723	-5.77382	7.74939e-09	1.21985e-07	ENSG00000166803	9768	PCLAF
1557	257.412	2.00522	0.174293	5.76741	8.0501e-09	1.26637e-07	ENSG00000165548	NA	TMEM63C
1558	319.931	1.73619	0.127699	5.76505	8.16342e-09	1.28337e-07	ENSG00000026950	11119	BTN3A1
1559	62.8898	2.5873	0.275546	5.76054	8.38432e-09	1.31725e-07	ENSG00000267796	55957	LIN37
1560	156.054	-2.16239	0.201792	-5.76035	8.39414e-09	1.31794e-07	ENSG00000177679	222183	SRRM3
1561	686.035	-1.69177	0.120095	-5.76014	8.40448e-09	1.31872e-07	ENSG00000148180	2934	GSN
1562	305.422	-1.71679	0.124452	-5.75955	8.43395e-09	1.32249e-07	ENSG00000122862	5552	SRGN
1563	206.287	1.86522	0.150391	5.75312	8.76098e-09	1.37289e-07	ENSG00000187601	28986	MAGEH1
1564	829.903	1.53475	0.092959	5.7525	8.7931e-09	1.37704e-07	ENSG00000103496	6810	STX4
1565	75.3595	-2.27447	0.221637	-5.75023	8.91207e-09	1.39478e-07	ENSG00000137501	54843	SYTL2
1566	2002.47	1.60274	0.104829	5.74975	8.93732e-09	1.39783e-07	ENSG00000145725	23262	PPIP5K2
1567	3912.72	-1.51962	0.0903837	-5.74902	8.97634e-09	1.40303e-07	ENSG00000110880	23603	CORO1C
1568	546.789	1.63786	0.110978	5.74766	9.0486e-09	1.41342e-07	ENSG00000147535	84513	PLPP5
1569	151.419	1.9972	0.173501	5.74752	9.05595e-09	1.41367e-07	ENSG00000196696	283970	PDXDC2P-NPIPB14P
1570	170.751	2.01044	0.175831	5.74664	9.10364e-09	1.4202e-07	ENSG00000265972	10628	TXNIP
1571	450.616	-1.64189	0.111735	-5.74475	9.20562e-09	1.43519e-07	ENSG00000100599	79890	RIN3
1572	465.9	1.77158	0.134325	5.7441	9.24137e-09	1.43985e-07	ENSG00000104872	55011	PIH1D1
1573	454.886	1.65595	0.114389	5.73439	9.78616e-09	1.52376e-07	ENSG00000139651	283337	ZNF740
1574	68.0707	-2.33708	0.233214	-5.73327	9.85127e-09	1.53291e-07	ENSG00000230330	NA	HMGN2P3
1575	23.1481	-3.53297	0.441896	-5.73206	9.9218e-09	1.54291e-07	ENSG00000141433	116	ADCYAP1
1576	2895.93	1.47602	0.0830475	5.73188	9.93261e-09	1.5436e-07	ENSG00000135837	9857	CEP350
1577	50.4694	2.91459	0.334086	5.73081	9.99518e-09	1.55234e-07	ENSG00000261140	NA
1578	56.9176	3.1838	0.381133	5.72976	1.00573e-08	1.561e-07	ENSG00000177324	139105	BEND2
1579	136.806	-2.00184	0.174894	-5.72826	1.01465e-08	1.57384e-07	ENSG00000159433	57519	STARD9
1580	370.036	-1.63717	0.111236	-5.72809	1.01565e-08	1.57439e-07	ENSG00000116991	57568	SIPA1L2
1581	267.944	-1.73883	0.128995	-5.72756	1.01883e-08	1.57831e-07	ENSG00000271943	NA
1582	73.8101	2.67996	0.293386	5.72611	1.02761e-08	1.59091e-07	ENSG00000141519	55036	CCDC40
1583	135.027	-1.91296	0.15961	-5.71991	1.0658e-08	1.64898e-07	ENSG00000251322	85358	SHANK3
1584	103.963	-1.99522	0.17406	-5.71765	1.08006e-08	1.66999e-07	ENSG00000169689	201254	CENPX
1585	253.723	-1.7041	0.123224	-5.71399	1.10355e-08	1.70523e-07	ENSG00000188130	6300	MAPK12
1586	63.1875	2.98919	0.348308	5.711	1.12311e-08	1.73435e-07	ENSG00000157578	150082	LCA5L
1587	256.684	1.8826	0.15464	5.70743	1.14695e-08	1.77004e-07	ENSG00000100151	9463	PICK1
1588	57.3721	-2.59243	0.279314	-5.70122	1.18952e-08	1.83458e-07	ENSG00000160094	149076	ZNF362
1589	899.436	1.53753	0.0944212	5.69286	1.24926e-08	1.9255e-07	ENSG00000151849	55835	CENPJ
1590	799.404	1.5277	0.0927434	5.6899	1.27112e-08	1.95796e-07	ENSG00000085721	54700	RRN3
1591	42.5441	-2.91526	0.336703	-5.68829	1.2832e-08	1.97533e-07	ENSG00000197301	100129940	HMGA2-AS1
1592	384.338	1.67241	0.118214	5.6881	1.28461e-08	1.97624e-07	ENSG00000168096	124401	ANKS3
1593	113.142	2.14092	0.200695	5.68484	1.30938e-08	2.01308e-07	ENSG00000116668	54823	SWT1
1594	74.9898	-2.17672	0.207051	-5.68324	1.32165e-08	2.03066e-07	ENSG00000213347	83463	MXD3
1595	766.959	1.5985	0.105554	5.67007	1.42738e-08	2.19173e-07	ENSG00000103540	9738	CCP110
1596	22.2028	-4.07015	0.541478	-5.66995	1.42837e-08	2.19187e-07	ENSG00000266265	136259	KLF14
1597	43.7147	6.90017	1.04066	5.66964	1.43095e-08	2.19445e-07	ENSG00000172602	27289	RND1
1598	1213.64	1.4878	0.086088	5.66627	1.45938e-08	2.23524e-07	ENSG00000155252	55361	PI4K2A
1599	87.4689	2.33221	0.235111	5.66629	1.45921e-08	2.23524e-07	ENSG00000159882	7773	ZNF230
1600	117.119	-2.03554	0.182823	-5.66419	1.47717e-08	2.26107e-07	ENSG00000160298	54058	C21orf58
1601	73.033	-2.27331	0.224836	-5.66327	1.48516e-08	2.27187e-07	ENSG00000138411	57520	HECW2
1602	2973.43	1.4515	0.0797449	5.66175	1.49841e-08	2.29071e-07	ENSG00000179195	144348	ZNF664
1603	452.05	-1.60992	0.107794	-5.6582	1.52965e-08	2.337e-07	ENSG00000213853	2013	EMP2
1604	2174.93	1.49855	0.0881414	5.65628	1.54688e-08	2.36185e-07	ENSG00000023287	9821	RB1CC1
1605	312.142	1.77681	0.137404	5.65347	1.57236e-08	2.39926e-07	ENSG00000183475	140460	ASB7
1606	59.9301	-2.40295	0.248166	-5.65326	1.57435e-08	2.40079e-07	ENSG00000137460	85462	FHDC1
1607	200.764	1.90254	0.159733	5.65032	1.60154e-08	2.44072e-07	ENSG00000233515	101929397	LINC01518
1608	327.416	1.80214	0.142014	5.64831	1.62032e-08	2.4678e-07	ENSG00000132846	84327	ZBED3
1609	34.8038	-2.86464	0.330143	-5.64798	1.62348e-08	2.47107e-07	ENSG00000243701	344595	DUBR
1610	32.1926	-2.87315	0.331707	-5.64701	1.63267e-08	2.48351e-07	ENSG00000184162	126382	NR2C2AP
1611	124.468	-1.96394	0.170839	-5.64238	1.67716e-08	2.5496e-07	ENSG00000178695	115207	KCTD12
1612	1476.73	1.48822	0.0865551	5.64052	1.69538e-08	2.57569e-07	ENSG00000102226	8237	USP11
1613	81.1806	-2.18594	0.210285	-5.63967	1.70374e-08	2.58678e-07	ENSG00000166448	222865	TMEM130
1614	457.613	-2.38164	0.245082	-5.63747	1.72565e-08	2.61841e-07	ENSG00000166689	144100	PLEKHA7
1615	691.236	1.57844	0.102655	5.63483	1.7523e-08	2.6572e-07	ENSG00000185163	317781	DDX51
1616	209.957	-1.70866	0.125888	-5.6293	1.80943e-08	2.74214e-07	ENSG00000174136	285704	RGMB
1617	107.267	2.21143	0.215367	5.62497	1.85541e-08	2.81006e-07	ENSG00000196387	7699	ZNF140
1618	91.8769	-2.2003	0.213812	-5.61379	1.9794e-08	2.99599e-07	ENSG00000205413	54809	SAMD9
1619	1701.93	-1.40831	0.0727445	-5.61298	1.98868e-08	3.00817e-07	ENSG00000115380	2202	EFEMP1
1620	1330.25	1.49965	0.0890615	5.61013	2.02172e-08	3.05626e-07	ENSG00000174938	26470	SEZ6L2
1621	34.9678	-2.75753	0.313523	-5.60575	2.07352e-08	3.13262e-07	ENSG00000171522	NA	PTGER4
1622	6725.62	-1.55158	0.0985081	-5.59938	2.15117e-08	3.24792e-07	ENSG00000151914	667	DST
1623	252.578	1.81996	0.146453	5.5988	2.1584e-08	3.25682e-07	ENSG00000136732	2995	GYPC
1624	214.022	-1.70801	0.126539	-5.5952	2.20366e-08	3.32306e-07	ENSG00000270882	8370	H4C14
1625	682.644	-1.66811	0.119505	-5.59065	2.26218e-08	3.4092e-07	ENSG00000119408	10783	NEK6
1626	139.626	-1.93588	0.167481	-5.58798	2.29732e-08	3.46002e-07	ENSG00000139291	55266	TMEM19
1627	1792.33	1.54758	0.0980261	5.58604	2.32302e-08	3.49657e-07	ENSG00000115020	200576	PIKFYVE
1628	2650.16	1.40858	0.0731675	5.58416	2.34834e-08	3.53251e-07	ENSG00000101199	55738	ARFGAP1
1629	467.758	1.64782	0.116258	5.57221	2.51533e-08	3.78137e-07	ENSG00000178397	NA	FAM220A
1630	161.683	-1.85393	0.153312	-5.56985	2.54961e-08	3.83053e-07	ENSG00000151702	2313	FLI1
1631	260.878	-2.87857	0.337525	-5.56571	2.61093e-08	3.92025e-07	ENSG00000229344	NA	MTCO2P12
1632	4131.27	-1.92679	0.166733	-5.55852	2.72066e-08	4.0825e-07	ENSG00000160789	4000	LMNA
1633	691.826	-2.40328	0.252559	-5.55627	2.75595e-08	4.1329e-07	ENSG00000149948	8091	HMGA2
1634	69.3704	-2.32392	0.238305	-5.55559	2.76683e-08	4.14667e-07	ENSG00000277586	4747	NEFL
1635	768.472	1.58738	0.105818	5.55084	2.84306e-08	4.25831e-07	ENSG00000160695	55823	VPS11
1636	32.0128	3.69734	0.486092	5.54903	2.87266e-08	4.3e-07	ENSG00000197599	645811	CCDC154
1637	346.055	-1.74743	0.13477	-5.54599	2.92301e-08	4.37268e-07	ENSG00000004478	2288	FKBP4
1638	397.011	1.68232	0.123079	5.54376	2.96044e-08	4.42596e-07	ENSG00000174177	348180	CTU2
1639	17113.2	-1.46519	0.0839429	-5.5417	2.99552e-08	4.47567e-07	ENSG00000067225	5315	PKM
1640	222.571	1.82883	0.149568	5.54149	2.9991e-08	4.47828e-07	ENSG00000127081	83744	ZNF484
1641	1421.08	1.56281	0.101581	5.54054	3.01548e-08	4.49998e-07	ENSG00000070061	8518	ELP1
1642	384.724	1.679	0.122575	5.53946	3.03403e-08	4.5249e-07	ENSG00000120697	29880	ALG5
1643	246.826	-1.82641	0.149291	-5.53558	3.10208e-08	4.62356e-07	ENSG00000171488	84230	LRRC8C
1644	184.24	-1.85281	0.154121	-5.53343	3.14034e-08	4.67773e-07	ENSG00000164684	619279	ZNF704
1645	30.6281	-2.8908	0.342088	-5.52724	3.25304e-08	4.84264e-07	ENSG00000114529	79669	C3orf52
1646	22.3853	-3.35056	0.42538	-5.52579	3.28001e-08	4.87981e-07	ENSG00000184363	11187	PKP3
1647	900.301	1.56425	0.102133	5.52468	3.30093e-08	4.90794e-07	ENSG00000037749	4238	MFAP3
1648	163.852	-1.92075	0.166716	-5.52286	3.3353e-08	4.95603e-07	ENSG00000182541	3985	LIMK2
1649	806.486	-1.53062	0.0961762	-5.51715	3.44538e-08	5.11648e-07	ENSG00000144711	9922	IQSEC1
1650	164.37	2.1629	0.210803	5.51654	3.45732e-08	5.1311e-07	ENSG00000275395	8857	FCGBP
1651	914.534	1.65255	0.118349	5.51374	3.51289e-08	5.20966e-07	ENSG00000048392	50484	RRM2B
1652	416.99	-1.62648	0.113623	-5.51366	3.51453e-08	5.20966e-07	ENSG00000167674	84717	HDGFL2
1653	214.262	-2.4819	0.2688	-5.51302	3.52735e-08	5.22549e-07	ENSG00000135272	29969	MDFIC
1654	209.125	1.84845	0.153927	5.51207	3.54644e-08	5.25059e-07	ENSG00000261512	NA
1655	121.435	-2.02433	0.185862	-5.51125	3.56298e-08	5.27187e-07	ENSG00000242498	348110	ARPIN
1656	691.399	-1.65814	0.119422	-5.51107	3.56656e-08	5.27396e-07	ENSG00000104341	55353	LAPTM4B
1657	32.4027	7.64821	1.207	5.50804	3.6285e-08	5.36232e-07	ENSG00000211892	NA	IGHG4
1658	57.2789	-2.40037	0.255152	-5.48838	4.05629e-08	5.99088e-07	ENSG00000226137	440465	BAIAP2-DT
1659	146.801	1.91673	0.167173	5.48369	4.16542e-08	6.14833e-07	ENSG00000176973	23625	FAM89B
1660	27.9144	-3.23829	0.408447	-5.47999	4.25344e-08	6.27447e-07	ENSG00000176092	55057	CRYBG2
1661	162.021	-1.80547	0.147068	-5.47682	4.33047e-08	6.38424e-07	ENSG00000198121	1902	LPAR1
1662	33.2519	4.30038	0.603135	5.47204	4.44879e-08	6.55471e-07	ENSG00000238260	NA
1663	1474.57	-1.95059	0.173765	-5.47059	4.48544e-08	6.60473e-07	ENSG00000066279	259266	ASPM
1664	31.0918	-3.15827	0.394611	-5.46937	4.51629e-08	6.64614e-07	ENSG00000125434	399512	SLC25A35
1665	38.7138	5.16317	0.761296	5.46853	4.53782e-08	6.6738e-07	ENSG00000285765	NA	FAM90A23P
1666	523.748	1.55081	0.100918	5.45802	4.81469e-08	7.07673e-07	ENSG00000132823	51526	OSER1
1667	238.648	-1.75372	0.138157	-5.45552	4.88309e-08	7.17039e-07	ENSG00000144645	114884	OSBPL10
1668	51.098	-2.4631	0.268189	-5.45547	4.88429e-08	7.17039e-07	ENSG00000253676	NA	TAGLN2P1
1669	1821.46	1.44467	0.0815661	5.45168	4.98954e-08	7.3205e-07	ENSG00000161217	5130	PCYT1A
1670	122.888	-1.98687	0.181033	-5.45133	4.99945e-08	7.33062e-07	ENSG00000165895	143872	ARHGAP42
1671	668.487	-1.53796	0.0986909	-5.45095	5.01016e-08	7.34191e-07	ENSG00000275832	57636	ARHGAP23
1672	34.9679	-2.69944	0.312142	-5.44445	5.19671e-08	7.61072e-07	ENSG00000163485	134	ADORA1
1673	141.96	2.08976	0.20022	5.44279	5.24524e-08	7.67718e-07	ENSG00000174132	345757	FAM174A
1674	199.719	-1.8022	0.147423	-5.44149	5.28353e-08	7.72396e-07	ENSG00000188827	84464	SLX4
1675	1055.01	-1.49025	0.0900932	-5.44159	5.28064e-08	7.72396e-07	ENSG00000108312	7343	UBTF
1676	4032.95	1.38106	0.070033	5.44119	5.29249e-08	7.73243e-07	ENSG00000198793	2475	MTOR
1677	1674.56	1.51285	0.094313	5.43773	5.39645e-08	7.8796e-07	ENSG00000109066	54868	TMEM104
1678	581.907	1.57642	0.106016	5.43715	5.41383e-08	7.90024e-07	ENSG00000171606	10782	ZNF274
1679	382.239	-2.41211	0.259726	-5.43693	5.42069e-08	7.90552e-07	ENSG00000124813	860	RUNX2
1680	374.722	1.64389	0.118438	5.43646	5.4348e-08	7.92137e-07	ENSG00000110721	1119	CHKA
1681	30.6022	-3.02433	0.372541	-5.43386	5.51477e-08	8.03313e-07	ENSG00000112837	NA	TBX18
1682	218.521	1.8288	0.15259	5.43157	5.58617e-08	8.13228e-07	ENSG00000179304	727866	FAM156B
1683	40.3117	-2.88322	0.346743	-5.43117	5.5985e-08	8.14536e-07	ENSG00000186469	54331	GNG2
1684	610.124	1.68796	0.126676	5.43087	5.60785e-08	8.15411e-07	ENSG00000135913	57695	USP37
1685	2345.95	1.42555	0.0783775	5.42948	5.6519e-08	8.21326e-07	ENSG00000101266	1457	CSNK2A1
1686	97.4335	2.18987	0.21917	5.42899	5.66741e-08	8.2309e-07	ENSG00000166387	8495	PPFIBP2
1687	3854.43	1.38505	0.0709277	5.4287	5.67648e-08	8.23917e-07	ENSG00000129083	1315	COPB1
1688	1150.16	1.46932	0.0864668	5.42774	5.70726e-08	8.27892e-07	ENSG00000198682	9060	PAPSS2
1689	355.674	-1.67689	0.124839	-5.42207	5.89127e-08	8.54077e-07	ENSG00000110719	10312	TCIRG1
1690	186.78	1.90281	0.16659	5.41935	5.98177e-08	8.66167e-07	ENSG00000226666	NA	HSPA9P1
1691	104.25	2.15201	0.212573	5.41937	5.98093e-08	8.66167e-07	ENSG00000248049	NA	UBA6-DT
1692	648.171	1.55273	0.102035	5.41702	6.06018e-08	8.77001e-07	ENSG00000213614	3073	HEXA
1693	900.387	-1.61715	0.11402	-5.41263	6.21053e-08	8.98227e-07	ENSG00000203811	126961	H3C14
1694	51.649	2.84714	0.341344	5.41138	6.25422e-08	9.04009e-07	ENSG00000116990	4610	MYCL
1695	649.751	-1.61092	0.112941	-5.40924	6.32935e-08	9.14327e-07	ENSG00000151491	2059	EPS8
1696	582.02	1.59255	0.109546	5.40913	6.33319e-08	9.1434e-07	ENSG00000089234	8315	BRAP
1697	38.7481	4.7232	0.688466	5.40796	6.37466e-08	9.19783e-07	ENSG00000181652	285973	ATG9B
1698	355.239	-1.66519	0.123097	-5.40379	6.52489e-08	9.40902e-07	ENSG00000148019	84131	CEP78
1699	651.105	1.58171	0.107711	5.40063	6.64064e-08	9.57029e-07	ENSG00000144659	54977	SLC25A38
1700	396.375	-2.33471	0.247387	-5.39523	6.84369e-08	9.8571e-07	ENSG00000156463	153769	SH3RF2
1701	785.777	1.57015	0.105694	5.39435	6.87703e-08	9.89927e-07	ENSG00000168495	NA	POLR3D
1702	150.965	-1.86481	0.160332	-5.39384	6.89657e-08	9.92155e-07	ENSG00000124635	8970	H2BC11
1703	137.585	-1.97043	0.180133	-5.38728	7.15311e-08	1.02845e-06	ENSG00000143147	23432	GPR161
1704	1912.91	1.41756	0.0775109	5.38707	7.16159e-08	1.02907e-06	ENSG00000156639	60685	ZFAND3
1705	326.491	-1.70033	0.13018	-5.37968	7.46191e-08	1.07159e-06	ENSG00000184678	8349	H2BC21
1706	624.184	1.51141	0.0950742	5.37911	7.4854e-08	1.07433e-06	ENSG00000099899	27037	TRMT2A
1707	50.9142	-2.47692	0.274622	-5.378	7.53176e-08	1.08035e-06	ENSG00000198846	9760	TOX
1708	253.729	-1.7272	0.135225	-5.37769	7.54492e-08	1.0816e-06	ENSG00000170677	9306	SOCS6
1709	43.4932	-2.80797	0.336315	-5.37584	7.62272e-08	1.09211e-06	ENSG00000158825	978	CDA
1710	772.049	-1.59024	0.109802	-5.37548	7.63794e-08	1.09365e-06	ENSG00000091409	3655	ITGA6
1711	1729.99	1.50592	0.0941265	5.37487	7.66371e-08	1.0967e-06	ENSG00000149311	472	ATM
1712	2353.63	1.39516	0.0735454	5.37295	7.74599e-08	1.10782e-06	ENSG00000113282	9685	CLINT1
1713	306.241	-1.70291	0.13084	-5.37226	7.77577e-08	1.11143e-06	ENSG00000154237	NA	LRRK1
1714	16.2907	-4.34924	0.623583	-5.37097	7.83155e-08	1.11875e-06	ENSG00000134986	9315	NREP
1715	55.7191	-2.68463	0.31367	-5.3707	7.84303e-08	1.11973e-06	ENSG00000135477	85349	KRT87P
1716	131.589	-1.97193	0.180974	-5.37055	7.84967e-08	1.12002e-06	ENSG00000106077	83451	ABHD11
1717	59.3629	2.76287	0.328259	5.37035	7.8583e-08	1.1206e-06	ENSG00000172476	142684	RAB40A
1718	75.3504	-2.19173	0.221929	-5.36986	7.87996e-08	1.12303e-06	ENSG00000128872	29767	TMOD2
1719	180.8	-1.73391	0.136761	-5.36632	8.03596e-08	1.1446e-06	ENSG00000125430	NA	HS3ST3B1
1720	29.3139	-5.06026	0.757051	-5.36326	8.17345e-08	1.1635e-06	ENSG00000279717	NA
1721	378.96	-1.74924	0.139788	-5.35978	8.3322e-08	1.18541e-06	ENSG00000184260	8338	H2AC20
1722	145.234	1.98244	0.183314	5.35931	8.35397e-08	1.18781e-06	ENSG00000249471	388569	ZNF324B
1723	275.748	-1.71228	0.13294	-5.35787	8.42102e-08	1.19595e-06	ENSG00000153956	781	CACNA2D1
1724	1184.99	1.49702	0.0927634	5.35794	8.41758e-08	1.19595e-06	ENSG00000177951	51272	BET1L
1725	512.772	1.68636	0.128162	5.35539	8.53732e-08	1.21176e-06	ENSG00000090674	NA	MCOLN1
1726	2720.22	1.41941	0.0783771	5.35123	8.73562e-08	1.23919e-06	ENSG00000065883	8621	CDK13
1727	42.6161	-2.57222	0.294123	-5.34545	9.0192e-08	1.27793e-06	ENSG00000235501	NA	CNN3-DT
1728	213.115	1.8337	0.155961	5.34555	9.01414e-08	1.27793e-06	ENSG00000241127	57002	YAE1
1729	16.8966	-4.03749	0.568482	-5.34316	9.13392e-08	1.29343e-06	ENSG00000231131	101928687	LNCAROD
1730	187.475	-1.83179	0.155689	-5.34263	9.16101e-08	1.29652e-06	ENSG00000168005	144097	SPINDOC
1731	1485.68	-1.49982	0.0935841	-5.34092	9.24776e-08	1.30803e-06	ENSG00000164574	55568	GALNT10
1732	473.446	1.74225	0.139182	5.33296	9.66233e-08	1.36588e-06	ENSG00000197822	100506658	OCLN
1733	296.183	1.70798	0.132801	5.33114	9.76004e-08	1.37889e-06	ENSG00000126775	22863	ATG14
1734	1457.08	1.52591	0.0987133	5.32763	9.95007e-08	1.40493e-06	ENSG00000173039	5970	RELA
1735	971.986	1.4913	0.0922716	5.3245	1.01233e-07	1.42691e-06	ENSG00000177542	79751	SLC25A22
1736	535.094	1.61555	0.115606	5.32452	1.01221e-07	1.42691e-06	ENSG00000119688	5826	ABCD4
1737	546.082	-1.52349	0.098315	-5.32461	1.01169e-07	1.42691e-06	ENSG00000276293	8396	PIP4K2B
1738	844.095	-1.44831	0.0842474	-5.32136	1.02997e-07	1.45094e-06	ENSG00000162704	10092	ARPC5
1739	221.855	1.90914	0.17088	5.32034	1.03574e-07	1.45823e-06	ENSG00000077348	56915	EXOSC5
1740	444.604	-1.66232	0.124511	-5.31939	1.04117e-07	1.46502e-06	ENSG00000163041	3020	H3-3A
1741	68.6701	-2.31787	0.24794	-5.31529	1.0649e-07	1.49756e-06	ENSG00000273270	NA
1742	74.2504	2.35629	0.255317	5.3122	1.08311e-07	1.52228e-06	ENSG00000102445	80183	RUBCNL
1743	39.629	-4.59137	0.676487	-5.30884	1.10322e-07	1.54966e-06	ENSG00000140807	85407	NKD1
1744	20.5054	-6.70429	1.07497	-5.30645	1.11779e-07	1.56921e-06	ENSG00000149633	85449	KIAA1755
1745	1146.85	-1.52144	0.0982871	-5.30525	1.1252e-07	1.57871e-06	ENSG00000006327	51330	TNFRSF12A
1746	2373.3	-1.51721	0.0975039	-5.30451	1.12975e-07	1.58419e-06	ENSG00000153317	50807	ASAP1
1747	2545.99	1.44468	0.0839084	5.29955	1.16085e-07	1.62686e-06	ENSG00000110344	9354	UBE4A
1748	1856.78	-1.51397	0.0970391	-5.29652	1.1803e-07	1.65317e-06	ENSG00000166147	2200	FBN1
1749	326.942	1.74998	0.141645	5.29483	1.19124e-07	1.66753e-06	ENSG00000257727	10330	CNPY2
1750	121.409	2.16259	0.219578	5.29465	1.19245e-07	1.66826e-06	ENSG00000225828	100128071	FAM229A
1751	406.749	-1.68353	0.129188	-5.29101	1.21644e-07	1.70086e-06	ENSG00000106034	79974	CPED1
1752	63.4556	-2.28978	0.243794	-5.29045	1.22019e-07	1.70512e-06	ENSG00000170571	133418	EMB
1753	597.47	-1.60916	0.115194	-5.28812	1.23583e-07	1.72598e-06	ENSG00000267519	NA	MIR23AHG
1754	39.6601	-2.55498	0.294392	-5.282	1.27778e-07	1.78356e-06	ENSG00000188153	1287	COL4A5
1755	217.19	1.7997	0.15149	5.27892	1.29949e-07	1.81282e-06	ENSG00000198453	374900	ZNF568
1756	1140.07	1.48959	0.0927511	5.27858	1.30188e-07	1.81512e-06	ENSG00000101782	8780	RIOK3
1757	186.272	1.8652	0.163921	5.27811	1.3052e-07	1.81871e-06	ENSG00000205659	91750	LIN52
1758	359.36	1.62474	0.118381	5.27737	1.31049e-07	1.82504e-06	ENSG00000185485	255812	SDHAP1
1759	50.5895	-2.51158	0.28658	-5.27456	1.33075e-07	1.85219e-06	ENSG00000138336	80312	TET1
1760	52.5299	-2.39496	0.264657	-5.27081	1.35821e-07	1.88933e-06	ENSG00000104415	8840	CCN4
1761	3494.2	-1.51106	0.0970163	-5.26774	1.38113e-07	1.92013e-06	ENSG00000162909	824	CAPN2
1762	306.591	1.70231	0.133338	5.26711	1.38585e-07	1.92559e-06	ENSG00000049167	1161	ERCC8
1763	83.1206	3.59109	0.492091	5.26547	1.39831e-07	1.9418e-06	ENSG00000173110	NA	HSPA6
1764	1326.57	1.50745	0.0964128	5.2633	1.41493e-07	1.96376e-06	ENSG00000159459	NA	UBR1
1765	76.6629	-2.12989	0.214707	-5.26248	1.42129e-07	1.97146e-06	ENSG00000169129	84632	AFAP1L2
1766	525.641	1.57117	0.108558	5.26143	1.42939e-07	1.98157e-06	ENSG00000144736	NA	SHQ1
1767	28.6474	-2.74989	0.332637	-5.26065	1.43545e-07	1.98884e-06	ENSG00000152284	83439	TCF7L1
1768	137.811	-1.83691	0.159252	-5.25523	1.47838e-07	2.046e-06	ENSG00000130956	NA	HABP4
1769	2890.73	1.42105	0.080119	5.25526	1.47812e-07	2.046e-06	ENSG00000142552	57333	RCN3
1770	229.409	1.80044	0.152326	5.25477	1.48212e-07	2.05001e-06	ENSG00000181035	284439	SLC25A42
1771	142.9	-1.90325	0.171967	-5.25244	1.50097e-07	2.07491e-06	ENSG00000164045	993	CDC25A
1772	122.623	-1.93349	0.177746	-5.25181	1.50608e-07	2.0808e-06	ENSG00000110881	41	ASIC1
1773	1307.52	1.48458	0.0923577	5.24681	1.54757e-07	2.1369e-06	ENSG00000120053	2805	GOT1
1774	3411.47	1.40835	0.0778516	5.24524	1.56081e-07	2.15397e-06	ENSG00000112473	7922	SLC39A7
1775	33.0361	-2.91124	0.364415	-5.24468	1.56556e-07	2.1593e-06	ENSG00000262655	10418	SPON1
1776	3418.5	1.34983	0.0667375	5.2419	1.58933e-07	2.19084e-06	ENSG00000166197	9221	NOLC1
1777	1773.6	1.44649	0.0851903	5.24105	1.59663e-07	2.19968e-06	ENSG00000166340	1200	TPP1
1778	470.881	-1.58738	0.112157	-5.23716	1.6307e-07	2.24534e-06	ENSG00000164402	23176	SEPTIN8
1779	383.517	1.71786	0.137111	5.23556	1.64482e-07	2.26351e-06	ENSG00000186814	100101467	ZSCAN30
1780	27.7659	7.36166	1.21588	5.23213	1.67568e-07	2.30468e-06	ENSG00000125522	2832	NPBWR2
1781	33.2837	-2.78879	0.342051	-5.22962	1.69859e-07	2.33487e-06	ENSG00000238243	343171	OR2W3
1782	28.493	4.07297	0.587809	5.22784	1.715e-07	2.35609e-06	ENSG00000102032	5973	RENBP
1783	1377.74	-1.47149	0.0902353	-5.22515	1.74011e-07	2.38925e-06	ENSG00000111206	2305	FOXM1
1784	59.5405	-2.43494	0.274747	-5.22276	1.76271e-07	2.41892e-06	ENSG00000147155	10682	EBP
1785	895.995	1.56425	0.108056	5.22185	1.77142e-07	2.42951e-06	ENSG00000052723	80143	SIKE1
1786	877.52	1.534	0.102321	5.21884	1.80047e-07	2.46795e-06	ENSG00000137876	NA	RSL24D1
1787	1968.41	1.43547	0.083477	5.21669	1.82153e-07	2.49543e-06	ENSG00000107854	80351	TNKS2
1788	513.645	1.60425	0.115862	5.2153	1.83522e-07	2.51276e-06	ENSG00000089195	51605	TRMT6
1789	123.358	-1.93859	0.179991	-5.21463	1.84184e-07	2.52042e-06	ENSG00000160233	81543	LRRC3
1790	102.474	-1.95062	0.18248	-5.20943	1.89422e-07	2.59065e-06	ENSG00000269791	548313	SSX4B
1791	108.802	-2.14222	0.219392	-5.20629	1.9265e-07	2.63332e-06	ENSG00000122547	NA	EEPD1
1792	36.8948	-2.6273	0.31272	-5.20368	1.95378e-07	2.66911e-06	ENSG00000185607	NA	ACTBP7
1793	110.324	-1.97336	0.187166	-5.20051	1.98739e-07	2.7135e-06	ENSG00000188070	65998	ZFTA
1794	189.136	-1.80771	0.155616	-5.19041	2.09827e-07	2.86329e-06	ENSG00000223612	NA
1795	1517.28	1.60989	0.117524	5.18949	2.10869e-07	2.8759e-06	ENSG00000198146	54989	ZNF770
1796	33.3899	-2.67565	0.323325	-5.18254	2.18884e-07	2.98355e-06	ENSG00000154822	23228	PLCL2
1797	555.506	1.5192	0.100187	5.18232	2.19139e-07	2.98535e-06	ENSG00000138709	55132	LARP1B
1798	140.653	2.02812	0.198699	5.17424	2.28838e-07	3.11575e-06	ENSG00000159733	57732	ZFYVE28
1799	169.488	1.86006	0.166564	5.16352	2.42346e-07	3.29783e-06	ENSG00000196263	57573	ZNF471
1800	26.3443	-2.91126	0.370259	-5.16194	2.44408e-07	3.32403e-06	ENSG00000101307	10326	SIRPB1
1801	50.7233	2.90773	0.369966	5.15649	2.51622e-07	3.42024e-06	ENSG00000057704	57458	TMCC3
1802	42.8003	-2.42977	0.277403	-5.15412	2.5483e-07	3.46191e-06	ENSG00000267453	102724279	CLEC4OP
1803	524.83	-1.66479	0.129016	-5.15277	2.56664e-07	3.48489e-06	ENSG00000119900	79627	OGFRL1
1804	69.9007	-2.0744	0.208527	-5.15233	2.57267e-07	3.49114e-06	ENSG00000117461	8503	PIK3R3
1805	719.768	1.59531	0.115569	5.15115	2.58893e-07	3.51125e-06	ENSG00000101343	51340	CRNKL1
1806	3404.92	-1.96287	0.18708	-5.1468	2.64966e-07	3.59162e-06	ENSG00000134871	1284	COL4A2
1807	573.564	1.53903	0.104813	5.14275	2.70739e-07	3.66783e-06	ENSG00000110074	55572	FOXRED1
1808	551.024	-1.57076	0.111045	-5.13986	2.74944e-07	3.72273e-06	ENSG00000171604	51523	CXXC5
1809	213.741	-1.80274	0.156183	-5.13972	2.75144e-07	3.72338e-06	ENSG00000146373	154214	RNF217
1810	137.397	2.04408	0.203191	5.13844	2.77031e-07	3.74683e-06	ENSG00000234771	NA	SLC25A25-AS1
1811	2391.92	1.47966	0.0933692	5.13722	2.78836e-07	3.76915e-06	ENSG00000033178	55236	UBA6
1812	43.1941	4.89166	0.757674	5.13632	2.80166e-07	3.78504e-06	ENSG00000254229	NA	FAM90A12P
1813	429.525	1.64726	0.126191	5.12923	2.9093e-07	3.92828e-06	ENSG00000168564	55602	CDKN2AIP
1814	77.0881	2.36959	0.267091	5.12783	2.93106e-07	3.95548e-06	ENSG00000115267	64135	IFIH1
1815	1503.18	1.4618	0.0901167	5.12444	2.9842e-07	4.02496e-06	ENSG00000083799	1540	CYLD
1816	478.707	1.67312	0.131465	5.12017	3.05255e-07	4.11487e-06	ENSG00000148842	54805	CNNM2
1817	82.9322	-2.08875	0.212736	-5.11786	3.09021e-07	4.16333e-06	ENSG00000003989	6542	SLC7A2
1818	885.757	1.53332	0.104248	5.11584	3.12341e-07	4.20574e-06	ENSG00000116138	NA	DNAJC16
1819	42.0277	-2.43887	0.281264	-5.11574	3.12515e-07	4.20576e-06	ENSG00000196337	94027	CGB7
1820	30.3896	-2.81056	0.353973	-5.11497	3.13793e-07	4.22064e-06	ENSG00000116396	3749	KCNC4
1821	97.4001	2.08061	0.211336	5.11324	3.1668e-07	4.25712e-06	ENSG00000188611	56624	ASAH2
1822	717.49	-1.98267	0.192195	-5.11288	3.17288e-07	4.26295e-06	ENSG00000139278	11010	GLIPR1
1823	142.032	-1.80763	0.158043	-5.11016	3.2189e-07	4.3224e-06	ENSG00000144857	91653	BOC
1824	142.3	1.94959	0.18597	5.10617	3.28752e-07	4.41211e-06	ENSG00000135245	NA	HILPDA
1825	905.642	-1.59237	0.116028	-5.10545	3.30002e-07	4.42645e-06	ENSG00000092841	4637	MYL6
1826	2193.12	-1.52325	0.102508	-5.10448	3.31704e-07	4.4444e-06	ENSG00000143933	805	CALM2
1827	93.2834	-2.12738	0.220857	-5.10457	3.3155e-07	4.4444e-06	ENSG00000062282	84649	DGAT2
1828	39.3187	3.77508	0.544543	5.09617	3.4659e-07	4.6413e-06	ENSG00000140254	90527	DUOXA1
1829	21.5364	-3.14941	0.421811	-5.09568	3.47491e-07	4.65082e-06	ENSG00000177301	3737	KCNA2
1830	90.5855	-1.9578	0.188131	-5.09113	3.55933e-07	4.76119e-06	ENSG00000203814	440689	H2BC18
1831	46.6559	7.12524	1.20376	5.08844	3.61017e-07	4.82655e-06	ENSG00000186205	64757	MTARC1
1832	187.064	1.82281	0.161796	5.08549	3.66676e-07	4.89952e-06	ENSG00000183718	84851	TRIM52
1833	151.247	1.87419	0.171934	5.08444	3.6871e-07	4.92401e-06	ENSG00000224596	NA	ZMIZ1-AS1
1834	1351.77	1.40806	0.0803622	5.07773	3.81965e-07	5.09823e-06	ENSG00000117597	27042	UTP25
1835	23.7484	-3.13636	0.420867	-5.0761	3.85258e-07	5.13938e-06	ENSG00000276410	3018	H2BC3
1836	37.9198	7.09846	1.20146	5.07589	3.85682e-07	5.14221e-06	ENSG00000255650	84983	FAM222A-AS1
1837	21.6458	-3.23741	0.441047	-5.07295	3.91702e-07	5.21962e-06	ENSG00000133107	7223	TRPC4
1838	899.043	-2.5046	0.296604	-5.07278	3.92049e-07	5.2214e-06	ENSG00000184371	1435	CSF1
1839	481.524	-1.58691	0.115701	-5.07265	3.92322e-07	5.22219e-06	ENSG00000141736	2064	ERBB2
1840	429.912	1.64668	0.127501	5.07199	3.9367e-07	5.23727e-06	ENSG00000145348	93627	TBCK
1841	240.973	-1.73422	0.145149	-5.05841	4.22762e-07	5.62124e-06	ENSG00000170421	3856	KRT8
1842	3622.42	-1.35181	0.069559	-5.05768	4.24397e-07	5.63991e-06	ENSG00000069275	64710	NUCKS1
1843	5867.79	1.38381	0.0758995	5.05685	4.26229e-07	5.66116e-06	ENSG00000182670	7267	TTC3
1844	42.0572	-2.7852	0.353256	-5.05355	4.3368e-07	5.757e-06	ENSG00000125247	84899	TMTC4
1845	2048.09	-1.37215	0.0736557	-5.05257	4.35906e-07	5.7834e-06	ENSG00000149639	140710	SOGA1
1846	51.2939	-4.14395	0.622284	-5.05228	4.36562e-07	5.78896e-06	ENSG00000169252	154	ADRB2
1847	58.9139	2.60635	0.318032	5.05091	4.39705e-07	5.82747e-06	ENSG00000165071	137835	TMEM71
1848	943.006	-1.96876	0.19183	-5.05007	4.41658e-07	5.85018e-06	ENSG00000183779	80139	ZNF703
1849	8.62221	-7.43956	1.27835	-5.03738	4.71935e-07	6.24782e-06	ENSG00000102760	NA	RGCC
1850	124.83	-1.88534	0.175843	-5.03483	4.78284e-07	6.32844e-06	ENSG00000196639	3269	HRH1
1851	51.5755	-2.30618	0.259534	-5.03279	4.8339e-07	6.39253e-06	ENSG00000004660	84254	CAMKK1
1852	120.55	-1.85337	0.169743	-5.02744	4.97074e-07	6.56994e-06	ENSG00000138346	1763	DNA2
1853	340.252	-1.65624	0.130546	-5.02691	4.98436e-07	6.58438e-06	ENSG00000213080	NA
1854	622.888	1.52167	0.103804	5.0255	5.02127e-07	6.62954e-06	ENSG00000164284	134266	GRPEL2
1855	51.2461	-2.34366	0.267403	-5.02485	5.03837e-07	6.64853e-06	ENSG00000152147	79833	GEMIN6
1856	46.2074	-2.43561	0.285899	-5.02141	5.12926e-07	6.7648e-06	ENSG00000169933	9758	FRMPD4
1857	27.5766	-3.0124	0.400803	-5.02092	5.14244e-07	6.77852e-06	ENSG00000145779	25816	TNFAIP8
1858	3764.24	-1.39535	0.0787458	-5.02065	5.14976e-07	6.7845e-06	ENSG00000163931	7086	TKT
1859	108.916	2.09635	0.218539	5.01673	5.25576e-07	6.92042e-06	ENSG00000255874	283487	PRECSIT
1860	1689.46	1.47326	0.0943669	5.01514	5.29961e-07	6.97439e-06	ENSG00000173273	8658	TNKS
1861	237.963	-1.69484	0.138559	-5.01474	5.31064e-07	6.98514e-06	ENSG00000103202	4833	NME4
1862	53.4233	-3.60646	0.5199	-5.01338	5.34807e-07	7.03059e-06	ENSG00000075461	NA	CACNG4
1863	1442.93	1.43757	0.0873672	5.00838	5.48908e-07	7.21206e-06	ENSG00000147050	7403	KDM6A
1864	67.7355	-2.08385	0.216679	-5.00209	5.67112e-07	7.44724e-06	ENSG00000182310	147650	SPACA6
1865	51.7007	2.70131	0.34025	5.00019	5.72737e-07	7.51705e-06	ENSG00000235890	NA	TSPEAR-AS1
1866	20.1365	-3.55684	0.511664	-4.99711	5.81954e-07	7.63393e-06	ENSG00000227496	NA
1867	415.755	-1.6234	0.124858	-4.9929	5.94805e-07	7.79831e-06	ENSG00000137713	5519	PPP2R1B
1868	732.873	-1.59109	0.11842	-4.99149	5.99163e-07	7.85122e-06	ENSG00000180900	23513	SCRIB
1869	28.7086	3.51859	0.504627	4.99099	6.00715e-07	7.86733e-06	ENSG00000197587	127343	DMBX1
1870	53.9872	-2.28051	0.256592	-4.99046	6.02363e-07	7.88468e-06	ENSG00000138311	22891	ZNF365
1871	35.0146	7.02015	1.20636	4.99035	6.02686e-07	7.88468e-06	ENSG00000188176	342527	SMTNL2
1872	56.1798	2.51136	0.302962	4.98861	6.08145e-07	7.95183e-06	ENSG00000244731	720	C4A
1873	56.1798	2.51136	0.302962	4.98861	6.08145e-07	7.95183e-06	ENSG00000244731	110384692	C4A
1874	17.596	7.08761	1.22091	4.98612	6.16049e-07	8.05088e-06	ENSG00000186832	NA	KRT16
1875	271.905	-1.65829	0.132074	-4.98423	6.22084e-07	8.12539e-06	ENSG00000084731	3797	KIF3C
1876	207.986	-1.88851	0.178345	-4.98198	6.29384e-07	8.21634e-06	ENSG00000157766	176	ACAN
1877	1087.78	1.42734	0.0857787	4.98184	6.29835e-07	8.21783e-06	ENSG00000141627	54808	DYM
1878	18.577	-3.33358	0.468642	-4.97944	6.37675e-07	8.31568e-06	ENSG00000230615	NA
1879	17.2459	-3.37261	0.476886	-4.97521	6.51773e-07	8.49498e-06	ENSG00000182575	11248	NXPH3
1880	24.6598	-3.07584	0.417448	-4.97269	6.60319e-07	8.60177e-06	ENSG00000223764	NA	LINC02593
1881	483.434	1.66166	0.133065	4.97246	6.61094e-07	8.60727e-06	ENSG00000166166	NA	TRMT61A
1882	94.1578	2.32023	0.265568	4.97133	6.64939e-07	8.65271e-06	ENSG00000288187	NA
1883	179.988	-1.73834	0.148552	-4.97026	6.68642e-07	8.69164e-06	ENSG00000160145	8997	KALRN
1884	283.159	-1.60353	0.121427	-4.97031	6.6845e-07	8.69164e-06	ENSG00000135048	23670	CEMIP2
1885	792.827	-1.42371	0.0852962	-4.96756	6.78015e-07	8.80878e-06	ENSG00000175115	55690	PACS1
1886	220.012	-1.65829	0.132537	-4.96686	6.80465e-07	8.83591e-06	ENSG00000175063	11065	UBE2C
1887	582.344	1.61486	0.12384	4.96494	6.87214e-07	8.91405e-06	ENSG00000173540	NA	GMPPB
1888	363.307	1.67245	0.135438	4.96501	6.86965e-07	8.91405e-06	ENSG00000186376	NA	ZNF75D
1889	70.1263	-2.32211	0.266457	-4.96179	6.98451e-07	9.055e-06	ENSG00000233237	79940	LINC00472
1890	26.852	-2.85127	0.373374	-4.95823	7.11392e-07	9.21787e-06	ENSG00000171051	2357	FPR1
1891	727.514	-1.59165	0.11939	-4.95564	7.20931e-07	9.33652e-06	ENSG00000214975	NA	PPIAP29
1892	563.873	-1.45608	0.092044	-4.955	7.2329e-07	9.3621e-06	ENSG00000075218	51512	GTSE1
1893	5295.15	1.42655	0.0860918	4.95458	7.24878e-07	9.37767e-06	ENSG00000172115	54205	CYCS
1894	488.511	-1.62047	0.125346	-4.95003	7.42009e-07	9.59421e-06	ENSG00000240184	5098	PCDHGC3
1895	369.873	-1.53955	0.10908	-4.94638	7.56063e-07	9.77075e-06	ENSG00000106049	11112	HIBADH
1896	119.628	-1.88558	0.179067	-4.94553	7.5937e-07	9.80311e-06	ENSG00000178409	57673	BEND3
1897	590.593	1.59346	0.119997	4.94557	7.59196e-07	9.80311e-06	ENSG00000169155	23099	ZBTB43
1898	1016.16	-1.41286	0.0835631	-4.94072	7.78331e-07	1.00426e-05	ENSG00000147955	10280	SIGMAR1
1899	399.259	1.66826	0.135303	4.93898	7.85314e-07	1.01273e-05	ENSG00000101882	79576	NKAP
1900	137.131	1.98689	0.199931	4.93616	7.96743e-07	1.02693e-05	ENSG00000100532	10668	CGRRF1
1901	17.0018	-3.53969	0.515096	-4.93052	8.20095e-07	1.05647e-05	ENSG00000160886	54742	LY6K
1902	222.101	1.7851	0.159279	4.92911	8.26067e-07	1.0636e-05	ENSG00000120370	92344	GORAB
1903	23.8515	7.01298	1.22022	4.92779	8.31649e-07	1.07022e-05	ENSG00000287796	NA
1904	3190.9	1.34918	0.0708834	4.92617	8.38556e-07	1.07854e-05	ENSG00000166986	4141	MARS1
1905	30.0683	3.52526	0.513097	4.9216	8.5838e-07	1.10346e-05	ENSG00000110944	51561	IL23A
1906	170.988	1.79534	0.161688	4.91897	8.70007e-07	1.11781e-05	ENSG00000256683	59348	ZNF350
1907	59.4341	2.34303	0.273058	4.91847	8.72248e-07	1.1201e-05	ENSG00000228612	NA	HK2P1
1908	174.058	1.83696	0.170226	4.91675	8.79918e-07	1.12936e-05	ENSG00000132906	842	CASP9
1909	175.852	1.84109	0.171071	4.9166	8.80585e-07	1.12962e-05	ENSG00000143951	51057	WDPCP
1910	5358.05	-1.87242	0.1775	-4.91505	8.87618e-07	1.13805e-05	ENSG00000105976	4233	MET
1911	170.702	1.84984	0.173114	4.9091	9.14952e-07	1.17247e-05	ENSG00000174109	NA	C16orf91
1912	2416.7	1.3682	0.0750119	4.9085	9.1777e-07	1.17547e-05	ENSG00000106261	7586	ZKSCAN1
1913	49.0496	-2.3316	0.271383	-4.90672	9.26122e-07	1.18554e-05	ENSG00000173702	NA	MUC13
1914	56.0034	-2.16434	0.237331	-4.90596	9.29707e-07	1.18951e-05	ENSG00000161682	284069	FAM171A2
1915	36.5977	3.34997	0.479191	4.90403	9.38881e-07	1.20062e-05	ENSG00000171811	NA	CFAP46
1916	33.2761	-2.56018	0.318463	-4.8991	9.6279e-07	1.23055e-05	ENSG00000119699	7043	TGFB3
1917	521.625	1.54584	0.111515	4.89482	9.83961e-07	1.25695e-05	ENSG00000115947	5000	ORC4
1918	1139.09	1.51975	0.106205	4.89383	9.88946e-07	1.26265e-05	ENSG00000090520	51726	DNAJB11
1919	27.9696	3.51216	0.513748	4.88987	1.00901e-06	1.28759e-05	ENSG00000176769	NA	TCERG1L
1920	1880.71	1.37925	0.0776983	4.881	1.0555e-06	1.34622e-05	ENSG00000148606	11128	POLR3A
1921	880.114	-1.46804	0.0959009	-4.88046	1.05841e-06	1.34922e-05	ENSG00000039523	79567	RIPOR1
1922	26.0837	4.83425	0.785939	4.87856	1.06861e-06	1.36152e-05	ENSG00000251003	NA	ZFPM2-AS1
1923	21.3298	-3.14925	0.440612	-4.87786	1.07243e-06	1.36567e-05	ENSG00000151967	29970	SCHIP1
1924	925.884	1.49576	0.101767	4.87152	1.10743e-06	1.40951e-05	ENSG00000156671	142891	SAMD8
1925	230.44	-1.66634	0.136804	-4.87079	1.11152e-06	1.41397e-05	ENSG00000001617	6405	SEMA3F
1926	74.977	-2.00584	0.206546	-4.86983	1.11696e-06	1.42015e-05	ENSG00000253161	NA	LINC01605
1927	179.898	1.8107	0.166719	4.86271	1.15791e-06	1.47145e-05	ENSG00000258927	NA
1928	495.409	1.50203	0.103404	4.85503	1.20369e-06	1.52883e-05	ENSG00000162928	NA	PEX13
1929	173.95	-1.77178	0.158976	-4.85468	1.2058e-06	1.53071e-05	ENSG00000165704	NA	HPRT1
1930	289.519	1.61599	0.126933	4.85285	1.21699e-06	1.54411e-05	ENSG00000163686	57406	ABHD6
1931	113.886	2.16381	0.239879	4.85168	1.22421e-06	1.55247e-05	ENSG00000134242	26191	PTPN22
1932	19.2253	-3.26028	0.46618	-4.84851	1.24393e-06	1.57666e-05	ENSG00000270002	NA
1933	66.4994	-2.09426	0.225768	-4.84684	1.25446e-06	1.58918e-05	ENSG00000198521	7594	ZNF43
1934	1313.16	-1.53868	0.111147	-4.84652	1.25646e-06	1.59089e-05	ENSG00000134318	9475	ROCK2
1935	236.515	-1.61421	0.126764	-4.84533	1.26402e-06	1.59962e-05	ENSG00000170779	55038	CDCA4
1936	300.921	1.63115	0.130271	4.84493	1.26654e-06	1.60198e-05	ENSG00000154114	219899	TBCEL
1937	18.1284	-3.39194	0.49408	-4.8412	1.29057e-06	1.63154e-05	ENSG00000270959	339929	LPP-AS2
1938	19.3394	-3.13959	0.442094	-4.83967	1.30055e-06	1.6433e-05	ENSG00000128011	57622	LRFN1
1939	321.891	1.6138	0.126918	4.83618	1.32361e-06	1.67158e-05	ENSG00000142632	128272	ARHGEF19
1940	13.8483	-4.13649	0.648772	-4.83451	1.33474e-06	1.68476e-05	ENSG00000104848	3743	KCNA7
1941	50.6042	2.51472	0.313535	4.8311	1.35783e-06	1.71301e-05	ENSG00000130475	23149	FCHO1
1942	323.059	-1.62267	0.128937	-4.82924	1.37055e-06	1.72816e-05	ENSG00000095015	4214	MAP3K1
1943	70.323	-2.01307	0.209797	-4.82878	1.37372e-06	1.73127e-05	ENSG00000204677	653316	FAM153CP
1944	156.838	1.85984	0.178131	4.82701	1.38601e-06	1.74586e-05	ENSG00000168404	197259	MLKL
1945	185.284	1.80938	0.167739	4.82521	1.39854e-06	1.76073e-05	ENSG00000105619	29844	TFPT
1946	39.4724	-2.7842	0.369883	-4.8237	1.40922e-06	1.77326e-05	ENSG00000146267	84553	FAXC
1947	265.853	1.68057	0.141099	4.82336	1.4116e-06	1.77534e-05	ENSG00000066651	60487	TRMT11
1948	135.399	-1.77503	0.160807	-4.81961	1.43836e-06	1.80806e-05	ENSG00000185189	NA	NRBP2
1949	39.3586	-2.47199	0.305449	-4.81911	1.44201e-06	1.81171e-05	ENSG00000225383	207107	SFTA1P
1950	31.9566	6.80843	1.20548	4.81834	1.44754e-06	1.81773e-05	ENSG00000121807	729230	CCR2
1951	174.713	-1.67195	0.139548	-4.81518	1.47068e-06	1.84584e-05	ENSG00000139998	376267	RAB15
1952	52.2467	2.78947	0.371706	4.81421	1.4778e-06	1.85383e-05	ENSG00000174628	124152	IQCK
1953	407.419	1.53912	0.11205	4.81146	1.49831e-06	1.87859e-05	ENSG00000156232	123720	WHAMM
1954	23.0033	-2.96581	0.408931	-4.80719	1.53068e-06	1.91819e-05	ENSG00000122035	387496	RASL11A
1955	209.035	1.76648	0.159462	4.80668	1.53458e-06	1.9211e-05	ENSG00000002822	8379	MAD1L1
1956	4471.9	1.37999	0.0790542	4.80676	1.53395e-06	1.9211e-05	ENSG00000108021	54906	TASOR2
1957	66.7778	-3.06554	0.430127	-4.80216	1.56964e-06	1.96398e-05	ENSG00000069399	602	BCL3
1958	731.16	1.55438	0.115845	4.78549	1.70569e-06	2.13312e-05	ENSG00000126217	23263	MCF2L
1959	28.9761	-2.71142	0.358098	-4.77919	1.76002e-06	2.19993e-05	ENSG00000277268	102723471	LHX1-DT
1960	1194.86	1.49608	0.103863	4.77633	1.78522e-06	2.2303e-05	ENSG00000188994	23036	ZNF292
1961	1354.55	-1.86989	0.182163	-4.77532	1.79423e-06	2.2404e-05	ENSG00000154127	84959	UBASH3B
1962	713.893	1.57213	0.119874	4.77277	1.81713e-06	2.26784e-05	ENSG00000156510	80201	HKDC1
1963	171.251	1.87306	0.182947	4.77218	1.82246e-06	2.27332e-05	ENSG00000102575	54	ACP5
1964	87.4982	-2.00754	0.211211	-4.7703	1.8395e-06	2.29224e-05	ENSG00000167535	784	CACNB3
1965	15.0327	6.88113	1.23286	4.77033	1.83928e-06	2.29224e-05	ENSG00000108405	5023	P2RX1
1966	31.9378	6.78825	1.21373	4.76898	1.85161e-06	2.30615e-05	ENSG00000188389	5133	PDCD1
1967	28.4472	-2.69811	0.356335	-4.76549	1.88393e-06	2.3452e-05	ENSG00000248698	NA	LINC01085
1968	253.009	1.68877	0.144559	4.76461	1.89218e-06	2.35427e-05	ENSG00000117533	8674	VAMP4
1969	351.346	1.56618	0.118841	4.76417	1.89629e-06	2.35819e-05	ENSG00000059769	548645	DNAJC25
1970	757.912	-1.50465	0.105967	-4.76227	1.91428e-06	2.37934e-05	ENSG00000206053	NA	JPT2
1971	684.906	1.44633	0.093773	4.75973	1.93849e-06	2.4082e-05	ENSG00000100395	NA	L3MBTL2
1972	30.6634	-2.71632	0.360604	-4.75957	1.94006e-06	2.40893e-05	ENSG00000007944	29116	MYLIP
1973	27.9881	3.60846	0.548075	4.75931	1.9426e-06	2.41086e-05	ENSG00000175325	5626	PROP1
1974	194.467	1.69157	0.145375	4.75714	1.96353e-06	2.4356e-05	ENSG00000185730	79943	ZNF696
1975	79.0787	2.19967	0.252362	4.75377	1.99661e-06	2.47537e-05	ENSG00000196517	6536	SLC6A9
1976	464.924	1.57634	0.121271	4.7525	2.00915e-06	2.48965e-05	ENSG00000105829	10282	BET1
1977	50.3678	-2.28555	0.270529	-4.75199	2.01423e-06	2.49468e-05	ENSG00000144355	1745	DLX1
1978	1050.68	-1.52557	0.11074	-4.74599	2.07493e-06	2.56856e-05	ENSG00000136108	26586	CKAP2
1979	489.329	1.48746	0.102717	4.74569	2.07797e-06	2.56971e-05	ENSG00000166526	7551	ZNF3
1980	20.044	6.80421	1.22304	4.74572	2.07769e-06	2.56971e-05	ENSG00000184515	340542	BEX5
1981	98.9298	2.08322	0.22826	4.74556	2.07932e-06	2.57008e-05	ENSG00000232040	114821	ZBED9
1982	139.661	1.91392	0.192648	4.74401	2.09528e-06	2.58849e-05	ENSG00000204599	56658	TRIM39
1983	102.562	2.07231	0.226077	4.74312	2.10452e-06	2.59859e-05	ENSG00000154133	54538	ROBO4
1984	936.882	-1.53975	0.113887	-4.73936	2.14395e-06	2.64594e-05	ENSG00000068366	2182	ACSL4
1985	853.699	-1.42163	0.0890031	-4.73727	2.16616e-06	2.672e-05	ENSG00000152767	10160	FARP1
1986	1005.41	-1.4519	0.0954158	-4.73607	2.17906e-06	2.68656e-05	ENSG00000091436	51776	MAP3K20
1987	19.5901	-3.27836	0.481495	-4.73185	2.2248e-06	2.74156e-05	ENSG00000279673	NA
1988	727.371	1.445	0.0940479	4.73166	2.2269e-06	2.74276e-05	ENSG00000126070	192669	AGO3
1989	874.19	1.40032	0.0846882	4.72703	2.27822e-06	2.80315e-05	ENSG00000244754	10443	N4BP2L2
1990	2137.85	1.42733	0.0904004	4.72704	2.27822e-06	2.80315e-05	ENSG00000140829	9785	DHX38
1991	40.2743	-2.38616	0.29351	-4.7227	2.32736e-06	2.86216e-05	ENSG00000246695	NA	RASSF8-AS1
1992	36.4729	-2.48674	0.314946	-4.72063	2.35113e-06	2.88994e-05	ENSG00000142619	51702	PADI3
1993	54.1319	-2.18862	0.25185	-4.71954	2.36379e-06	2.90403e-05	ENSG00000162976	130814	SLC66A3
1994	118.594	-1.87822	0.186163	-4.71748	2.38789e-06	2.93217e-05	ENSG00000197121	80055	PGAP1
1995	782.056	1.45178	0.0957739	4.7172	2.39109e-06	2.93462e-05	ENSG00000272886	55802	DCP1A
1996	911.126	-1.41528	0.0880547	-4.71619	2.40301e-06	2.94776e-05	ENSG00000164104	3148	HMGB2
1997	192.6	1.8924	0.189405	4.7116	2.45776e-06	3.01341e-05	ENSG00000197619	284370	ZNF615
1998	61.3086	-2.09721	0.232969	-4.70969	2.48094e-06	3.0403e-05	ENSG00000255495	NA
1999	11.2939	-4.46471	0.735802	-4.70875	2.49242e-06	3.05284e-05	ENSG00000147145	2846	LPAR4
[truncated: 26,997 more rows]

## Sheet: Output_DESeq2_δ-T3_vs_VC
	baseMean	log2FoldChange	lfcSE	stat	pvalue	padj	gene	entrezgene_id	external_gene_name
1	5835.64	3.89976	0.0969341	29.9147	1.26562e-196	3.08797e-192	ENSG00000051108	9709	HERPUD1
2	75981.2	3.52782	0.088517	28.5574	2.27272e-179	2.77261e-175	ENSG00000044574	3309	HSPA5
3	2365.38	3.56292	0.0965733	26.5386	3.48143e-155	2.83145e-151	ENSG00000112379	NA	ARFGEF3
4	5041.85	3.13459	0.088102	24.2287	1.10976e-129	6.76927e-126	ENSG00000052749	23223	RRP12
5	845.417	4.24268	0.137453	23.5912	4.74486e-123	2.31539e-119	ENSG00000243742	113157	RPLP0P2
6	1030.26	3.76581	0.118454	23.3493	1.40198e-120	5.70114e-117	ENSG00000114388	10641	NPRL2
7	907.147	-3.01154	0.0870757	-23.1011	4.51822e-118	1.57486e-114	ENSG00000186480	3638	INSIG1
8	2245.39	3.53462	0.109802	23.0835	6.78823e-118	2.07032e-114	ENSG00000152409	133746	JMY
9	1974.69	-3.11619	0.0980871	-21.5746	3.10961e-103	8.43014e-100	ENSG00000154678	5137	PDE1C
10	991.481	-3.16725	0.101754	-21.2988	1.16356e-100	2.83896e-97	ENSG00000183688	359845	RFLNB
11	2205.86	3.77865	0.131337	21.1567	2.39511e-99	5.31257e-96	ENSG00000128590	4189	DNAJB9
12	2216.16	3.32746	0.11229	20.7273	1.96504e-95	3.99542e-92	ENSG00000101255	57761	TRIB3
13	713.567	5.83966	0.23382	20.6982	3.59388e-95	6.74515e-92	ENSG00000139269	83729	INHBE
14	4803.51	2.67653	0.0827597	20.2578	3.0346e-91	5.28866e-88	ENSG00000140941	81631	MAP1LC3B
15	2145.11	-3.03879	0.103243	-19.7475	8.42103e-87	1.36977e-83	ENSG00000145934	57451	TENM2
16	283.555	-5.00531	0.203324	-19.6991	2.19523e-86	3.34759e-83	ENSG00000138347	84665	MYPN
17	565.641	-3.68589	0.136449	-19.6842	2.9435e-86	4.22462e-83	ENSG00000106829	7091	TLE4
18	1717.31	2.95543	0.0994179	19.6688	3.99025e-86	5.40878e-83	ENSG00000133103	57511	COG6
19	592.355	-3.02543	0.103119	-19.6417	6.81348e-86	8.74958e-83	ENSG00000144810	1295	COL8A1
20	409.306	-3.77771	0.142259	-19.5257	6.64324e-85	8.10442e-82	ENSG00000185697	4603	MYBL1
21	581.648	-3.50313	0.128536	-19.4741	1.821e-84	2.11574e-81	ENSG00000287080	8352	H3C3
22	877.175	-2.87935	0.0968472	-19.4053	6.95627e-84	7.71482e-81	ENSG00000112972	3157	HMGCS1
23	3726.64	-3.00712	0.104256	-19.2518	1.36255e-82	1.44543e-79	ENSG00000022267	2273	FHL1
24	1525	-3.16258	0.112425	-19.2357	1.85952e-82	1.89043e-79	ENSG00000171848	6241	RRM2
25	598.795	4.09973	0.161164	19.2334	1.94306e-82	1.89634e-79	ENSG00000175197	1649	DDIT3
26	306.627	-3.70926	0.141437	-19.1552	8.75292e-82	8.21394e-79	ENSG00000120437	39	ACAT2
27	1968.9	2.65365	0.0873884	18.923	7.3699e-80	6.65994e-77	ENSG00000117682	79947	DHDDS
28	541.095	-3.66583	0.141653	-18.8195	5.22897e-79	4.55649e-76	ENSG00000138771	57619	SHROOM3
29	11834.5	2.72756	0.0939334	18.3913	1.54112e-75	1.29661e-72	ENSG00000149428	10525	HYOU1
30	4745.75	2.48599	0.0815072	18.2314	2.90524e-74	2.36283e-71	ENSG00000105835	10135	NAMPT
31	1327.58	2.77012	0.0972677	18.1984	5.31388e-74	4.18237e-71	ENSG00000137414	NA	FAM8A1
32	2866.59	2.48198	0.0821501	18.0398	9.48038e-73	7.2285e-70	ENSG00000136868	1317	SLC31A1
33	414.807	-3.47332	0.138092	-17.9107	9.73065e-72	7.19449e-69	ENSG00000113645	23286	WWC1
34	909.946	-2.59167	0.0890458	-17.8748	1.85484e-71	1.33107e-68	ENSG00000079459	2222	FDFT1
35	1586.91	-3.11735	0.118872	-17.812	5.7036e-71	3.97606e-68	ENSG00000092820	7430	EZR
36	10085	-2.69687	0.0954018	-17.7866	8.98165e-71	6.08731e-68	ENSG00000130402	81	ACTN4
37	788.217	3.52484	0.142917	17.6664	7.60763e-70	5.01672e-67	ENSG00000140830	54957	TXNL4B
38	560.765	-3.32192	0.131944	-17.5977	2.56374e-69	1.64612e-66	ENSG00000276368	8331	H2AC14
39	1882.23	-2.67068	0.094958	-17.5939	2.7432e-69	1.71619e-66	ENSG00000137831	55075	UACA
40	1498.63	2.54648	0.0884822	17.4778	2.11321e-68	1.289e-65	ENSG00000166123	84706	GPT2
41	72401.9	-2.80682	0.103402	-17.4737	2.27117e-68	1.35157e-65	ENSG00000075624	60	ACTB
42	635.212	3.10218	0.120348	17.4676	2.52906e-68	1.4692e-65	ENSG00000119899	26503	SLC17A5
43	662.858	3.1849	0.125235	17.4464	3.66448e-68	2.07929e-65	ENSG00000060762	51660	MPC1
44	1079.47	-3.25604	0.130125	-17.3375	2.4524e-67	1.35991e-64	ENSG00000196923	9260	PDLIM7
45	776.552	-2.82551	0.105369	-17.325	3.04709e-67	1.65213e-64	ENSG00000100297	4174	MCM5
46	1920.87	-2.85362	0.108118	-17.1444	6.92054e-66	3.67074e-63	ENSG00000163430	11167	FSTL1
47	313.778	-4.32632	0.194152	-17.1325	8.48583e-66	4.40523e-63	ENSG00000221866	91584	PLXNA4
48	542.326	-2.89479	0.11076	-17.1072	1.31155e-65	6.66678e-63	ENSG00000052802	6307	MSMO1
49	708.194	3.04049	0.119587	17.0627	2.81041e-65	1.39941e-62	ENSG00000157796	57728	WDR19
50	430.392	-3.13578	0.125395	-17.0325	4.71652e-65	2.30157e-62	ENSG00000186185	146909	KIF18B
51	5658.76	-2.48687	0.0874622	-17.0002	8.18822e-65	3.91734e-62	ENSG00000148773	4288	MKI67
52	1581.45	2.42216	0.0837798	16.975	1.25717e-64	5.89877e-62	ENSG00000159399	3099	HK2
53	2514.61	2.2782	0.075322	16.9699	1.37282e-64	6.31989e-62	ENSG00000100883	6729	SRP54
54	204.705	-4.11761	0.184335	-16.9127	3.62483e-64	1.63782e-61	ENSG00000180914	5021	OXTR
55	703.37	2.9695	0.117331	16.7858	3.09951e-63	1.375e-60	ENSG00000099337	9424	KCNK6
56	508.498	3.77477	0.165446	16.7714	3.94901e-63	1.72057e-60	ENSG00000137494	338699	ANKRD42
57	378.875	5.50304	0.269967	16.68	1.83319e-62	7.84702e-60	ENSG00000155961	116442	RAB39B
58	374.963	4.95452	0.237279	16.6662	2.3099e-62	9.7171e-60	ENSG00000119508	8013	NR4A3
59	2284.67	-2.53608	0.0921879	-16.6625	2.45519e-62	1.01532e-59	ENSG00000064666	1265	CNN2
60	402.621	3.59519	0.156377	16.5957	7.48774e-62	3.04489e-59	ENSG00000214595	400954	EML6
61	1996.4	2.62414	0.0978875	16.5919	7.97565e-62	3.19013e-59	ENSG00000104907	55621	TRMT1
62	2863.23	-2.56542	0.0952045	-16.4427	9.46614e-61	3.72523e-58	ENSG00000173546	1464	CSPG4
63	307.736	-3.73753	0.16662	-16.4298	1.17046e-60	4.53302e-58	ENSG00000172159	257019	FRMD3
64	495.011	-3.18143	0.132807	-16.4256	1.25352e-60	4.77885e-58	ENSG00000112144	22858	CILK1
65	1182.69	2.84319	0.112371	16.4028	1.82649e-60	6.85608e-58	ENSG00000128923	54629	MINDY2
66	3542.01	-2.93612	0.118165	-16.3849	2.45087e-60	9.06041e-58	ENSG00000035403	7414	VCL
67	239.112	-4.21163	0.196569	-16.3384	5.26298e-60	1.91659e-57	ENSG00000274997	85235	H2AC12
68	321.393	-3.79698	0.171371	-16.3212	6.97851e-60	2.50395e-57	ENSG00000198796	115701	ALPK2
69	2662.58	-2.37985	0.084808	-16.2703	1.60284e-59	5.66778e-57	ENSG00000131473	47	ACLY
70	4238.64	2.03907	0.0643201	16.1546	1.05362e-58	3.67246e-56	ENSG00000120742	NA	SERP1
71	1841.75	2.74118	0.107839	16.146	1.21172e-58	4.16405e-56	ENSG00000132510	23135	KDM6B
72	679.912	3.0267	0.12569	16.1246	1.71432e-58	5.80942e-56	ENSG00000187193	4501	MT1X
73	1225.82	2.47787	0.0920849	16.049	5.80563e-58	1.94043e-55	ENSG00000156502	6832	SUPV3L1
74	337.939	-3.3268	0.145712	-15.9684	2.11991e-57	6.98969e-55	ENSG00000198033	NA	TUBA3C
75	6317.39	-2.57758	0.0991113	-15.9172	4.81323e-57	1.56584e-54	ENSG00000177469	284119	CAVIN1
76	2714.88	-2.86524	0.117287	-15.9032	6.02299e-57	1.93362e-54	ENSG00000129116	23022	PALLD
77	714.629	4.95072	0.248736	15.8832	8.28237e-57	2.62444e-54	ENSG00000215895	NA	HSPA5P1
78	626.071	2.98419	0.124953	15.8795	8.78936e-57	2.74938e-54	ENSG00000163818	54585	LZTFL1
79	303.427	-3.34941	0.14856	-15.8146	2.46879e-56	7.62481e-54	ENSG00000146426	26230	TIAM2
80	606.46	-2.68206	0.106382	-15.8115	2.59139e-56	7.90341e-54	ENSG00000040275	54908	SPDL1
81	784.369	-3.03129	0.128593	-15.7963	3.30086e-56	9.94291e-54	ENSG00000196787	8969	H2AC11
82	2173.47	-2.53629	0.0977167	-15.7219	1.07036e-55	3.18483e-53	ENSG00000188229	NA	TUBB4B
83	702.834	-2.83194	0.116732	-15.6936	1.67354e-55	4.91959e-53	ENSG00000168077	51435	SCARA3
84	472.753	3.09011	0.133227	15.6884	1.81695e-55	5.27761e-53	ENSG00000137171	89953	KLC4
85	3510.08	-2.75346	0.111856	-15.6761	2.20428e-55	6.32731e-53	ENSG00000083857	2195	FAT1
86	730.027	-2.93841	0.123815	-15.6557	3.03937e-55	8.62299e-53	ENSG00000146072	NA	TNFRSF21
87	2914.14	-2.54084	0.0985658	-15.6326	4.36489e-55	1.22413e-52	ENSG00000011426	54443	ANLN
88	1012.6	2.84998	0.11871	15.5841	9.33581e-55	2.58846e-52	ENSG00000068971	5526	PPP2R5B
89	2737.19	-3.96329	0.190495	-15.5557	1.45484e-54	3.98838e-52	ENSG00000122786	800	CALD1
90	2988.9	2.23804	0.0799159	15.4917	3.94456e-54	1.06937e-51	ENSG00000128607	23008	KLHDC10
91	1339.06	-2.36298	0.0881356	-15.4646	6.01363e-54	1.61238e-51	ENSG00000167552	7846	TUBA1A
92	1753.61	2.61677	0.104663	15.4474	7.8496e-54	2.08177e-51	ENSG00000091592	22861	NLRP1
93	1180.37	-2.58177	0.102456	-15.4386	9.00081e-54	2.36141e-51	ENSG00000103489	64131	XYLT1
94	2545.35	-2.77216	0.114802	-15.4367	9.27438e-54	2.40729e-51	ENSG00000151835	26278	SACS
95	391.02	3.81221	0.183078	15.3607	3.00275e-53	7.712e-51	ENSG00000230882	NA
96	687.548	-2.75322	0.114229	-15.3483	3.63594e-53	9.24097e-51	ENSG00000249992	25907	TMEM158
97	1975.92	2.18508	0.0772893	15.333	4.59908e-53	1.15683e-50	ENSG00000112715	7422	VEGFA
98	1607.91	-2.55404	0.101363	-15.3314	4.7191e-53	1.17491e-50	ENSG00000117519	1266	CNN3
99	769.838	3.32776	0.15216	15.2981	7.86855e-53	1.93924e-50	ENSG00000162772	467	ATF3
100	382.05	4.44017	0.225213	15.2752	1.11891e-52	2.73003e-50	ENSG00000135253	375616	KCP
101	401.51	-3.4362	0.159771	-15.248	1.69719e-52	4.09998e-50	ENSG00000162063	899	CCNF
102	863.308	-2.74893	0.114987	-15.2098	3.04526e-52	7.28444e-50	ENSG00000145386	890	CCNA2
103	2034.61	2.38544	0.0912098	15.1896	4.14562e-52	9.82028e-50	ENSG00000107175	NA	CREB3
104	661.032	-2.81609	0.119682	-15.1742	5.24016e-52	1.22937e-49	ENSG00000164442	10370	CITED2
105	295.008	-3.28	0.150262	-15.1735	5.29992e-52	1.23155e-49	ENSG00000156475	5521	PPP2R2B
106	24469.1	-3.44605	0.161648	-15.1319	9.97475e-52	2.29598e-49	ENSG00000184009	71	ACTG1
107	251.305	5.10204	0.271738	15.0956	1.73204e-51	3.94954e-49	ENSG00000133134	84707	BEX2
108	3117.16	2.10215	0.0733108	15.0339	4.40081e-51	9.94217e-49	ENSG00000104765	665	BNIP3L
109	1764.2	-2.82842	0.121821	-15.0091	6.40416e-51	1.43353e-48	ENSG00000169213	5865	RAB3B
110	619.586	3.11822	0.141235	14.9979	7.57835e-51	1.68095e-48	ENSG00000163644	152926	PPM1K
111	408.362	-3.13959	0.143407	-14.9197	2.4546e-50	5.39548e-48	ENSG00000119969	3070	HELLS
112	5234.06	-1.87198	0.0584603	-14.9158	2.59953e-50	5.66304e-48	ENSG00000116133	1718	DHCR24
113	1961.41	-4.31549	0.222391	-14.9084	2.90557e-50	6.27371e-48	ENSG00000157168	3084	NRG1
114	2231.64	2.22276	0.0823344	14.8511	6.84167e-50	1.4643e-47	ENSG00000120686	51569	UFM1
115	1237.43	-2.54054	0.103868	-14.8317	9.13606e-50	1.92165e-47	ENSG00000146674	3486	IGFBP3
116	956.175	-2.89889	0.128026	-14.8321	9.08766e-50	1.92165e-47	ENSG00000175602	11007	CCDC85B
117	377.848	-3.09044	0.14106	-14.8194	1.09694e-49	2.28754e-47	ENSG00000170442	3892	KRT86
118	940.962	2.49512	0.101059	14.7946	1.58842e-49	3.28439e-47	ENSG00000258890	90799	CEP95
119	220.263	-3.20979	0.149429	-14.7882	1.74502e-49	3.57787e-47	ENSG00000109084	27346	TMEM97
120	1205.23	2.4436	0.0976834	14.7784	2.01979e-49	4.10674e-47	ENSG00000157800	84255	SLC37A3
121	2810.99	2.13953	0.0771149	14.777	2.06002e-49	4.15391e-47	ENSG00000127526	79939	SLC35E1
122	1261.31	2.44559	0.0979431	14.7595	2.67279e-49	5.34536e-47	ENSG00000177380	8541	PPFIA3
123	692.94	2.63572	0.110936	14.7448	3.32435e-49	6.59437e-47	ENSG00000150527	4253	MIA2
124	327.169	-3.6189	0.177721	-14.736	3.78347e-49	7.44459e-47	ENSG00000074410	771	CA12
125	430.053	7.20239	0.421365	14.7198	4.81401e-49	9.39656e-47	ENSG00000187908	1755	DMBT1
126	369.973	-3.25382	0.153473	-14.6854	7.99083e-49	1.54737e-46	ENSG00000188549	388115	CCDC9B
127	480.032	-2.76527	0.120221	-14.6836	8.21016e-49	1.57732e-46	ENSG00000168502	23255	MTCL1
128	3096.39	2.21005	0.0824435	14.6773	9.01464e-49	1.71835e-46	ENSG00000118217	22926	ATF6
129	862.559	2.74733	0.119223	14.656	1.23285e-48	2.33181e-46	ENSG00000198718	23116	TOGARAM1
130	4509.98	-2.25725	0.0858168	-14.6503	1.34052e-48	2.51595e-46	ENSG00000075618	6624	FSCN1
131	1333.84	-2.40622	0.0960142	-14.646	1.42977e-48	2.66298e-46	ENSG00000176014	84617	TUBB6
132	752.501	-2.43892	0.098358	-14.6294	1.82291e-48	3.36948e-46	ENSG00000183963	6525	SMTN
133	567.561	3.26179	0.154824	14.6088	2.46837e-48	4.52825e-46	ENSG00000197852	55924	INKA2
134	197.222	-3.56091	0.17566	-14.5788	3.8338e-48	6.98066e-46	ENSG00000180801	79642	ARSJ
135	2780.84	-3.59873	0.17885	-14.5302	7.79837e-48	1.40943e-45	ENSG00000091986	151887	CCDC80
136	2018.43	-4.70327	0.254902	-14.5282	8.02786e-48	1.44023e-45	ENSG00000136153	4008	LMO7
137	750.77	-2.98885	0.137114	-14.5051	1.12433e-47	2.00237e-45	ENSG00000144583	NA	MARCHF4
138	689.528	-2.48434	0.102369	-14.4999	1.21329e-47	2.14515e-45	ENSG00000132561	4147	MATN2
139	442.049	-2.8997	0.131061	-14.4947	1.30845e-47	2.29676e-45	ENSG00000154864	63895	PIEZO2
140	1260.97	2.28746	0.089152	14.4412	2.84799e-47	4.96344e-45	ENSG00000211460	7247	TSN
141	891.85	2.62405	0.112522	14.4332	3.19965e-47	5.53676e-45	ENSG00000113811	NA	SELENOK
142	218.36	-3.45986	0.170507	-14.4267	3.51314e-47	6.03641e-45	ENSG00000121753	576	ADGRB2
143	19594	-2.32111	0.0916183	-14.4197	3.88772e-47	6.63332e-45	ENSG00000100345	4627	MYH9
144	892.092	-3.79187	0.19375	-14.4097	4.49977e-47	7.62429e-45	ENSG00000171435	283455	KSR2
145	1440.87	-2.65289	0.114964	-14.3775	7.16005e-47	1.20481e-44	ENSG00000101333	5332	PLCB4
146	900.387	-2.71927	0.119689	-14.3644	8.6557e-47	1.44651e-44	ENSG00000203811	126961	H3C14
147	240.638	-3.36397	0.164786	-14.3457	1.133e-46	1.88055e-44	ENSG00000167034	4824	NKX3-1
148	426.481	-3.17241	0.152278	-14.2661	3.56015e-46	5.8692e-44	ENSG00000113721	5159	PDGFRB
149	847.454	-2.93042	0.13544	-14.253	4.2972e-46	7.03673e-44	ENSG00000104738	NA	MCM4
150	26999.8	-4.84029	0.269888	-14.2292	6.03868e-46	9.82251e-44	ENSG00000137801	7057	THBS1
151	366.692	-3.3554	0.165738	-14.2116	7.76764e-46	1.25512e-43	ENSG00000185340	10634	GAS2L1
152	2555.63	-2.11299	0.078508	-14.1768	1.27578e-45	2.04787e-43	ENSG00000167553	84790	TUBA1C
153	211.965	-3.47795	0.17497	-14.1622	1.56996e-45	2.50362e-43	ENSG00000136492	83990	BRIP1
154	2512.03	-2.72873	0.12228	-14.1375	2.23158e-45	3.5356e-43	ENSG00000158710	8407	TAGLN2
155	1135.03	-2.47018	0.104068	-14.1271	2.58642e-45	4.07135e-43	ENSG00000101224	994	CDC25B
156	827.262	2.7593	0.124682	14.1103	3.27971e-45	5.12959e-43	ENSG00000168209	54541	DDIT4
157	4135.09	-4.44904	0.244979	-14.079	5.11624e-45	7.95102e-43	ENSG00000140416	7168	TPM1
158	300.957	-3.22913	0.158407	-14.0721	5.63496e-45	8.70174e-43	ENSG00000141858	90378	SAMD1
159	890.042	-2.608	0.114366	-14.0601	6.67863e-45	1.02485e-42	ENSG00000183087	2621	GAS6
160	3598.47	-2.29043	0.0920861	-14.0133	1.29196e-44	1.97016e-42	ENSG00000071127	9948	WDR1
161	16201.6	-3.49075	0.177802	-14.0085	1.38206e-44	2.09447e-42	ENSG00000106366	5054	SERPINE1
162	369.734	-3.12346	0.151837	-13.9852	1.91973e-44	2.89133e-42	ENSG00000047936	6098	ROS1
163	788.132	-2.83749	0.131467	-13.9768	2.15964e-44	3.2327e-42	ENSG00000169908	4071	TM4SF1
164	5319.12	-2.01134	0.0723617	-13.9762	2.17774e-44	3.23993e-42	ENSG00000169710	2194	FASN
165	435.373	-2.62699	0.116492	-13.9665	2.49511e-44	3.68958e-42	ENSG00000101057	4605	MYBL2
166	398.458	-2.87591	0.134321	-13.9659	2.51647e-44	3.69875e-42	ENSG00000135454	2583	B4GALNT1
167	529.63	-5.75402	0.340749	-13.9517	3.07315e-44	4.48992e-42	ENSG00000117525	2152	F3
168	1366.82	2.24785	0.0895012	13.9423	3.50595e-44	5.09177e-42	ENSG00000121749	64786	TBC1D15
169	325.846	-6.26622	0.377869	-13.9366	3.79465e-44	5.47845e-42	ENSG00000273703	8342	H2BC14
170	425.705	-2.916	0.137568	-13.9276	4.30466e-44	6.1782e-42	ENSG00000127334	8445	DYRK2
171	561.757	-4.70556	0.266263	-13.9169	5.00215e-44	7.13728e-42	ENSG00000118523	1490	CCN2
172	932.337	2.33789	0.0961932	13.9083	5.63778e-44	7.99745e-42	ENSG00000130733	78992	YIPF2
173	1479.41	2.41649	0.102056	13.8795	8.43097e-44	1.18906e-41	ENSG00000070444	4335	MNT
174	2416.26	2.24887	0.0900294	13.8719	9.3819e-44	1.31557e-41	ENSG00000242802	9907	AP5Z1
175	475.746	-2.71666	0.123853	-13.8605	1.09963e-43	1.53314e-41	ENSG00000104884	2068	ERCC2
176	910.286	-2.45285	0.104849	-13.8567	1.15901e-43	1.60675e-41	ENSG00000187098	4286	MITF
177	248.182	-3.32439	0.16783	-13.8496	1.27879e-43	1.76278e-41	ENSG00000154146	4900	NRGN
178	493.234	-2.7619	0.127507	-13.818	1.98403e-43	2.71957e-41	ENSG00000149591	6876	TAGLN
179	812.167	-2.40838	0.102008	-13.8066	2.32695e-43	3.1718e-41	ENSG00000070404	NA	FSTL3
180	378.736	-3.17992	0.157908	-13.805	2.37811e-43	3.22353e-41	ENSG00000074590	9891	NUAK1
181	187.619	-3.42311	0.1756	-13.799	2.58294e-43	3.48183e-41	ENSG00000123374	1017	CDK2
182	558.336	-2.79792	0.130353	-13.7928	2.81776e-43	3.7775e-41	ENSG00000155816	56776	FMN2
183	793.88	-2.5446	0.112099	-13.7788	3.41837e-43	4.55764e-41	ENSG00000117632	3925	STMN1
184	510.481	-2.62913	0.118274	-13.7742	3.6438e-43	4.83179e-41	ENSG00000113368	4001	LMNB1
185	2052.87	-2.57407	0.114303	-13.7711	3.80574e-43	5.01926e-41	ENSG00000114019	51421	AMOTL2
186	1187.08	2.37835	0.100119	13.7671	4.02172e-43	5.27558e-41	ENSG00000081307	79876	UBA5
187	268.372	-3.02328	0.147168	-13.7481	5.22905e-43	6.82265e-41	ENSG00000127564	9088	PKMYT1
188	126.433	-4.10511	0.225903	-13.7453	5.43309e-43	7.05117e-41	ENSG00000204682	NA	MIR1915HG
189	1159.39	-2.62846	0.11857	-13.7342	6.33945e-43	8.18393e-41	ENSG00000188486	3014	H2AX
190	137.922	-4.68747	0.268756	-13.7205	7.65042e-43	9.77412e-41	ENSG00000144476	57007	ACKR3
191	567.475	-2.98355	0.144568	-13.7205	7.65137e-43	9.77412e-41	ENSG00000115325	1796	DOK1
192	353.872	3.47414	0.180362	13.7176	7.9675e-43	1.01249e-40	ENSG00000135116	8739	HRK
193	436.954	3.19643	0.160133	13.7163	8.10851e-43	1.02507e-40	ENSG00000130513	9518	GDF15
194	1514.83	2.23256	0.0899875	13.697	1.05812e-42	1.33078e-40	ENSG00000179562	NA	GCC1
195	684.952	-4.14234	0.229551	-13.6891	1.17987e-42	1.47628e-40	ENSG00000140937	1009	CDH11
196	196.562	5.04342	0.297044	13.6122	3.38952e-42	4.21944e-40	ENSG00000134548	80763	SPX
197	1136.24	2.17655	0.0865137	13.5996	4.02642e-42	4.98684e-40	ENSG00000179119	144108	SPTY2D1
198	10737.2	-3.21932	0.163295	-13.5909	4.5375e-42	5.59144e-40	ENSG00000128510	NA	CPA4
199	750.389	-2.28035	0.0942113	-13.5902	4.57792e-42	5.61289e-40	ENSG00000177084	5426	POLE
200	3483.2	1.90515	0.0666372	13.5833	5.03159e-42	6.13829e-40	ENSG00000140105	7453	WARS1
201	1614.03	2.23755	0.0911622	13.5752	5.61736e-42	6.8188e-40	ENSG00000135241	50640	PNPLA8
202	662.864	-3.78578	0.205719	-13.5417	8.87046e-42	1.07144e-39	ENSG00000105971	858	CAV2
203	1383.98	-2.5002	0.110952	-13.5211	1.17394e-41	1.41098e-39	ENSG00000118985	22936	ELL2
204	2422.25	-2.39553	0.103376	-13.4995	1.57396e-41	1.88251e-39	ENSG00000131747	7153	TOP2A
205	629.675	2.68853	0.12517	13.49	1.79205e-41	2.13288e-39	ENSG00000125629	51141	INSIG2
206	647.515	2.35476	0.100464	13.485	1.91671e-41	2.27019e-39	ENSG00000205629	51451	LCMT1
207	246.822	-3.4129	0.179093	-13.4729	2.25739e-41	2.66077e-39	ENSG00000204131	340527	NHSL2
208	233.656	4.77014	0.279901	13.4696	2.36284e-41	2.77168e-39	ENSG00000130477	23025	UNC13A
209	645.837	2.63911	0.121807	13.4566	2.81495e-41	3.28622e-39	ENSG00000047346	56204	FAM214A
210	168.95	-3.36958	0.176158	-13.4514	3.01922e-41	3.5079e-39	ENSG00000092470	79968	WDR76
211	634.037	2.50874	0.112229	13.4434	3.3662e-41	3.88363e-39	ENSG00000143457	55204	GOLPH3L
212	466.962	-2.57648	0.11727	-13.4432	3.37444e-41	3.88363e-39	ENSG00000135476	9700	ESPL1
213	976.871	2.41058	0.104993	13.435	3.7708e-41	4.30017e-39	ENSG00000172071	9451	EIF2AK3
214	523.237	2.87978	0.139917	13.435	3.77162e-41	4.30017e-39	ENSG00000122507	27241	BBS9
215	888.195	-2.85794	0.138404	-13.4241	4.37111e-41	4.9605e-39	ENSG00000110427	25758	KIAA1549L
216	1484.45	2.21307	0.090693	13.3755	8.40617e-41	9.49546e-39	ENSG00000136643	26750	RPS6KC1
217	2360.21	-2.0977	0.0822748	-13.3418	1.32193e-40	1.48635e-38	ENSG00000123416	NA	TUBA1B
218	1769.82	2.18431	0.0888933	13.3228	1.7053e-40	1.90861e-38	ENSG00000179918	22928	SEPHS2
219	1550.56	-2.17369	0.0881956	-13.3078	2.08412e-40	2.32194e-38	ENSG00000176619	84823	LMNB2
220	5094.78	1.94449	0.0710127	13.3003	2.30555e-40	2.55695e-38	ENSG00000173230	2804	GOLGB1
221	622.071	-2.86421	0.140263	-13.2908	2.61756e-40	2.88986e-38	ENSG00000004399	23129	PLXND1
222	4494.88	-2.10936	0.0836589	-13.2605	3.92349e-40	4.31212e-38	ENSG00000159840	7791	ZYX
223	1912.65	-2.09672	0.0827325	-13.2562	4.15565e-40	4.54681e-38	ENSG00000182481	3838	KPNA2
224	1586.03	2.40558	0.106158	13.2404	5.12668e-40	5.58419e-38	ENSG00000196505	NA	GDAP2
225	223.526	-3.47311	0.187111	-13.2174	6.96484e-40	7.55267e-38	ENSG00000125726	970	CD70
226	1724.55	-2.17398	0.088831	-13.2158	7.10832e-40	7.67415e-38	ENSG00000103335	9780	PIEZO1
227	241.932	-2.9071	0.144322	-13.2141	7.27229e-40	7.81659e-38	ENSG00000167693	64359	NXN
228	779.397	2.46449	0.110851	13.2114	7.54486e-40	8.04353e-38	ENSG00000147905	84186	ZCCHC7
229	145.939	-3.88348	0.218258	-13.2113	7.54936e-40	8.04353e-38	ENSG00000149596	57158	JPH2
230	310.134	-5.57423	0.346935	-13.1847	1.07527e-39	1.14067e-37	ENSG00000061337	11178	LZTS1
231	1308.1	-2.31979	0.100196	-13.172	1.2713e-39	1.34279e-37	ENSG00000140564	5045	FURIN
232	659.828	-2.62328	0.123285	-13.1669	1.36079e-39	1.43112e-37	ENSG00000126705	27245	AHDC1
233	349.622	-2.76248	0.133976	-13.1552	1.58921e-39	1.66417e-37	ENSG00000072195	10290	SPEG
234	3162.18	1.93885	0.0713843	13.1521	1.65566e-39	1.72634e-37	ENSG00000148358	57720	GPR107
235	1254.69	-2.38602	0.105498	-13.1378	1.99854e-39	2.075e-37	ENSG00000214049	NA	UCA1
236	30370.3	-3.19268	0.167199	-13.1142	2.73013e-39	2.82256e-37	ENSG00000124942	79026	AHNAK
237	118.858	-4.22617	0.246275	-13.0999	3.29762e-39	3.39488e-37	ENSG00000126822	NA	PLEKHG3
238	3046.66	-2.32162	0.101133	-13.0681	5.00911e-39	5.13518e-37	ENSG00000065308	9697	TRAM2
239	2915.82	1.98396	0.0753383	13.0606	5.5319e-39	5.6474e-37	ENSG00000104419	10397	NDRG1
240	1226.36	-3.96777	0.227423	-13.0496	6.39235e-39	6.49863e-37	ENSG00000164465	285761	DCBLD1
241	2729.05	-2.35325	0.103799	-13.0372	7.51282e-39	7.60602e-37	ENSG00000105329	7040	TGFB1
242	339.309	-2.71431	0.131778	-13.0091	1.08612e-38	1.09505e-36	ENSG00000140848	221184	CPNE2
243	302.726	-3.28155	0.175413	-13.0067	1.12059e-38	1.12516e-36	ENSG00000111859	4739	NEDD9
244	514.08	-4.24639	0.249614	-13.0056	1.13665e-38	1.13661e-36	ENSG00000276043	29128	UHRF1
245	834.453	-2.5294	0.11767	-12.9974	1.26651e-38	1.26129e-36	ENSG00000090530	55214	P3H2
246	987.324	-2.46073	0.112963	-12.931	3.01063e-38	2.98603e-36	ENSG00000181467	5912	RAP2B
247	839.895	2.33066	0.10298	12.9216	3.40097e-38	3.35953e-36	ENSG00000100647	NA	SUSD6
248	285.087	-5.06449	0.314575	-12.9206	3.44491e-38	3.38921e-36	ENSG00000139292	8549	LGR5
249	2410.38	2.10247	0.0853388	12.9187	3.52984e-38	3.45882e-36	ENSG00000094975	51430	SUCO
250	2181.38	2.23956	0.0960898	12.9	4.50039e-38	4.3922e-36	ENSG00000229644	NA	NAMPTP1
251	472.353	-2.78365	0.13828	-12.8988	4.57074e-38	4.44308e-36	ENSG00000272398	100133941	CD24
252	9442.84	-2.14863	0.0891622	-12.8825	5.64953e-38	5.46995e-36	ENSG00000150938	51232	CRIM1
253	797.487	-2.35627	0.105294	-12.8808	5.77634e-38	5.57063e-36	ENSG00000270276	554313	H4C15
254	355.483	3.07779	0.161489	12.8665	6.95169e-38	6.67773e-36	ENSG00000106537	27075	TSPAN13
255	316.195	-2.89182	0.147166	-12.855	8.0599e-38	7.7119e-36	ENSG00000170312	983	CDK1
256	155.745	-3.88371	0.224504	-12.8448	9.1975e-38	8.766e-36	ENSG00000162614	91624	NEXN
257	2139.06	-2.35965	0.105862	-12.8436	9.34103e-38	8.86817e-36	ENSG00000159335	5763	PTMS
258	1467.64	2.12153	0.0873626	12.8377	1.00831e-37	9.53556e-36	ENSG00000012822	57658	CALCOCO1
259	179.116	-3.23356	0.174042	-12.8335	1.06497e-37	1.00325e-35	ENSG00000167081	5090	PBX3
260	299.342	3.27395	0.177309	12.8248	1.19078e-37	1.11746e-35	ENSG00000146409	116843	SLC18B1
261	233.857	-3.40048	0.187253	-12.8195	1.27514e-37	1.19203e-35	ENSG00000140557	8128	ST8SIA2
262	254.713	-3.20953	0.172364	-12.819	1.2842e-37	1.19592e-35	ENSG00000101447	81610	FAM83D
263	307.784	3.18065	0.170621	12.7806	2.10329e-37	1.95127e-35	ENSG00000164953	91147	TMEM67
264	2173.19	2.02877	0.0806257	12.7598	2.74809e-37	2.53979e-35	ENSG00000144747	NA	TMF1
265	529.291	2.52615	0.119656	12.7545	2.94086e-37	2.7077e-35	ENSG00000258102	643246	MAP1LC3B2
266	162.521	-3.46104	0.192997	-12.7517	3.05187e-37	2.79935e-35	ENSG00000065328	55388	MCM10
267	1924.57	2.1355	0.08925	12.7226	4.42601e-37	4.04458e-35	ENSG00000281649	100506710	EBLN3P
268	508.935	-2.59658	0.125529	-12.7188	4.6524e-37	4.23559e-35	ENSG00000161714	113026	PLCD3
269	658.866	-2.57652	0.124021	-12.7117	5.08881e-37	4.61568e-35	ENSG00000171055	9637	FEZ2
270	204.275	4.51805	0.276871	12.7065	5.44435e-37	4.91988e-35	ENSG00000206077	653082	ZDHHC11B
271	418.442	-3.91262	0.229706	-12.6798	7.65419e-37	6.89131e-35	ENSG00000146376	NA	ARHGAP18
272	2853.34	2.12126	0.0885075	12.6685	8.8375e-37	7.92743e-35	ENSG00000214655	23053	ZSWIM8
273	941.012	-3.96496	0.234557	-12.6407	1.25993e-36	1.12605e-34	ENSG00000183287	147372	CCBE1
274	7243.21	-1.79156	0.0627034	-12.6239	1.5585e-36	1.38781e-34	ENSG00000072110	87	ACTN1
275	628.343	-2.82068	0.144407	-12.608	1.90824e-36	1.69306e-34	ENSG00000158321	26053	AUTS2
276	659.441	2.40455	0.111561	12.59	2.39697e-36	2.11897e-34	ENSG00000128965	79094	CHAC1
277	385.872	-2.71645	0.136593	-12.5662	3.23969e-36	2.85362e-34	ENSG00000213030	94115	CGB8
278	253.883	-2.78294	0.142378	-12.5226	5.61966e-36	4.93216e-34	ENSG00000122952	11130	ZWINT
279	1417.53	-3.45912	0.196408	-12.5205	5.76921e-36	5.04527e-34	ENSG00000171992	11346	SYNPO
280	1917.54	1.90344	0.0722617	12.5023	7.25044e-36	6.31798e-34	ENSG00000110619	833	CARS1
281	461.008	-2.56424	0.125163	-12.4976	7.69047e-36	6.67757e-34	ENSG00000137124	219	ALDH1B1
282	189.854	4.6844	0.294957	12.4913	8.3268e-36	7.20445e-34	ENSG00000214866	728597	DCDC2C
283	222.476	-6.39559	0.432117	-12.4864	8.85664e-36	7.6358e-34	ENSG00000125378	652	BMP4
284	262.796	-2.73529	0.139001	-12.484	9.12273e-36	7.81002e-34	ENSG00000135821	2752	GLUL
285	4095.68	-2.28046	0.102566	-12.4842	9.1043e-36	7.81002e-34	ENSG00000161638	3678	ITGA5
286	4431.24	-3.96207	0.237697	-12.4615	1.21019e-35	1.03243e-33	ENSG00000150687	11098	PRSS23
287	767.698	2.46102	0.117283	12.4571	1.27879e-35	1.08715e-33	ENSG00000173465	10534	ZNRD2
288	871.244	2.30439	0.104808	12.4456	1.47794e-35	1.25209e-33	ENSG00000231074	414777	HCG18
289	483.777	-2.65496	0.133153	-12.4291	1.81734e-35	1.5343e-33	ENSG00000157600	84187	TMEM164
290	1682.81	2.54565	0.124452	12.4196	2.04528e-35	1.72078e-33	ENSG00000167797	10263	CDK2AP2
291	684.011	-2.58019	0.12754	-12.3897	2.97168e-35	2.49161e-33	ENSG00000127946	3092	HIP1
292	3936.47	-4.07228	0.248215	-12.3775	3.45961e-35	2.89079e-33	ENSG00000105974	857	CAV1
293	95.3438	-4.78997	0.306288	-12.3739	3.61947e-35	3.01404e-33	ENSG00000156466	NA	GDF6
294	1441.8	-3.54749	0.205993	-12.3669	3.94844e-35	3.2768e-33	ENSG00000198768	164284	APCDD1L
295	759.931	-2.43072	0.115791	-12.3561	4.51698e-35	3.7233e-33	ENSG00000115355	55704	CCDC88A
296	141.013	-3.72846	0.220816	-12.3563	4.50632e-35	3.7233e-33	ENSG00000120693	4093	SMAD9
297	142.475	-3.83086	0.229197	-12.3512	4.79755e-35	3.94126e-33	ENSG00000154764	7476	WNT7A
298	691.553	2.54796	0.125809	12.3041	8.61185e-35	7.05103e-33	ENSG00000164615	819	CAMLG
299	1476.05	1.9879	0.0802931	12.3037	8.65634e-35	7.06375e-33	ENSG00000170581	6773	STAT2
300	310.178	3.41192	0.196091	12.3	9.05589e-35	7.36516e-33	ENSG00000188760	130612	TMEM198
301	998.619	-2.44501	0.117714	-12.2755	1.22594e-34	9.93748e-33	ENSG00000147100	NA	SLC16A2
302	4518.98	2.12599	0.0918511	12.2588	1.50702e-34	1.21754e-32	ENSG00000154305	375056	MIA3
303	98.9207	-4.22583	0.263206	-12.2559	1.56184e-34	1.25767e-32	ENSG00000130176	1264	CNN1
304	3260.84	2.01083	0.0824991	12.2526	1.62696e-34	1.3058e-32	ENSG00000055483	57602	USP36
305	531.571	2.54344	0.125993	12.2502	1.67567e-34	1.34048e-32	ENSG00000162910	128308	MRPL55
306	384.159	-2.70919	0.139594	-12.2441	1.80778e-34	1.44144e-32	ENSG00000090924	64857	PLEKHG2
307	301.394	-2.94976	0.159266	-12.2421	1.85094e-34	1.47105e-32	ENSG00000145431	56034	PDGFC
308	276.856	-5.90573	0.401104	-12.2306	2.13404e-34	1.69054e-32	ENSG00000117152	5999	RGS4
309	1017.64	2.0845	0.0886894	12.2281	2.20063e-34	1.73764e-32	ENSG00000119523	NA	ALG2
310	1944.59	-2.43917	0.117875	-12.2092	2.77516e-34	2.18423e-32	ENSG00000164292	22836	RHOBTB3
311	176.368	3.89334	0.237077	12.2042	2.9509e-34	2.31508e-32	ENSG00000119636	NA	BBOF1
312	362.965	-2.70369	0.139625	-12.2019	3.03727e-34	2.3752e-32	ENSG00000140332	7090	TLE3
313	18922.4	1.90639	0.0744601	12.1728	4.33955e-34	3.38277e-32	ENSG00000185624	5034	P4HB
314	197.614	4.23786	0.266444	12.1521	5.59179e-34	4.34504e-32	ENSG00000092929	201294	UNC13D
315	591.54	-4.32192	0.273493	-12.1462	6.00579e-34	4.65192e-32	ENSG00000111186	81029	WNT5B
316	2806.69	-2.28124	0.105566	-12.1369	6.73327e-34	5.1989e-32	ENSG00000106211	3315	HSPB1
317	501.389	2.50269	0.123833	12.1348	6.90776e-34	5.3168e-32	ENSG00000166562	90701	SEC11C
318	252.946	-3.08543	0.171924	-12.13	7.32807e-34	5.62256e-32	ENSG00000184557	9021	SOCS3
319	100.443	-4.524	0.290814	-12.1177	8.51021e-34	6.50911e-32	ENSG00000169994	4648	MYO7B
320	653.292	2.34267	0.110848	12.1127	9.04978e-34	6.90018e-32	ENSG00000224271	NA
321	811.865	-2.14719	0.0947531	-12.1072	9.67819e-34	7.35633e-32	ENSG00000112984	10112	KIF20A
322	170.981	-3.52429	0.208613	-12.1004	1.05114e-33	7.96487e-32	ENSG00000166396	8710	SERPINB7
323	483.976	-2.70815	0.141219	-12.0957	1.11231e-33	8.40225e-32	ENSG00000148468	221061	FAM171A1
324	978.335	2.1414	0.0944022	12.0908	1.18108e-33	8.89416e-32	ENSG00000167112	26995	TRUB2
325	593.846	-2.69429	0.140168	-12.0876	1.22853e-33	9.22308e-32	ENSG00000112297	202	CRYBG1
326	259.186	-2.92574	0.159413	-12.0801	1.34485e-33	1.00653e-31	ENSG00000043143	23338	JADE2
327	597.863	2.45173	0.12029	12.0686	1.54806e-33	1.15508e-31	ENSG00000168701	29100	TMEM208
328	277.389	-2.78662	0.148146	-12.0598	1.72205e-33	1.28098e-31	ENSG00000203852	333932	H3C15
329	1260.19	-2.17699	0.0979039	-12.0219	2.72713e-33	2.01634e-31	ENSG00000100503	51199	NIN
330	4151.54	2.29787	0.107957	12.0221	2.7202e-33	2.01634e-31	ENSG00000087074	NA	PPP1R15A
331	2294.95	-2.43749	0.119682	-12.0109	3.11272e-33	2.29448e-31	ENSG00000130147	23677	SH3BP4
332	1097.38	2.09163	0.0912167	11.9674	5.26604e-33	3.87006e-31	ENSG00000125952	4149	MAX
333	1806.44	-3.57008	0.214886	-11.9602	5.743e-33	4.20791e-31	ENSG00000058668	493	ATP2B4
334	173.597	-3.31552	0.193641	-11.9578	5.91192e-33	4.31871e-31	ENSG00000265190	653145	ANXA8
335	272.63	-2.74587	0.146101	-11.9498	6.51178e-33	4.74271e-31	ENSG00000102384	2491	CENPI
336	1168.34	2.06931	0.0897027	11.9206	9.23928e-33	6.7092e-31	ENSG00000128335	23780	APOL2
337	871.383	2.23803	0.103877	11.9182	9.51776e-33	6.89091e-31	ENSG00000160570	162989	DEDD2
338	280.668	-2.7218	0.144652	-11.903	1.14138e-32	8.23923e-31	ENSG00000167889	146664	MGAT5B
339	1889.52	-3.42931	0.204211	-11.8961	1.24025e-32	8.92649e-31	ENSG00000050405	51474	LIMA1
340	467.192	2.94774	0.163747	11.8948	1.26022e-32	9.04356e-31	ENSG00000114796	54800	KLHL24
341	665.515	2.4465	0.121617	11.8938	1.27398e-32	9.11552e-31	ENSG00000125459	55154	MSTO1
342	1236.83	2.04738	0.0880634	11.8935	1.2799e-32	9.13111e-31	ENSG00000138942	91445	RNF185
343	213.963	-3.12356	0.178565	-11.8924	1.29602e-32	9.21911e-31	ENSG00000013619	10046	MAMLD1
344	593.169	-2.6349	0.137642	-11.8779	1.54174e-32	1.09351e-30	ENSG00000156802	29028	ATAD2
345	370.272	-2.6276	0.137149	-11.8674	1.749e-32	1.23692e-30	ENSG00000166483	7465	WEE1
346	634.231	-2.22597	0.103611	-11.8324	2.6535e-32	1.87118e-30	ENSG00000171793	1503	CTPS1
347	784.796	-3.95446	0.249887	-11.8232	2.96226e-32	2.08289e-30	ENSG00000169047	3667	IRS1
348	88.2221	-4.34431	0.282934	-11.8201	3.07231e-32	2.15406e-30	ENSG00000269416	104472717	LINC01224
349	442.16	-4.21265	0.271813	-11.8194	3.10006e-32	2.16728e-30	ENSG00000103196	83716	CRISPLD2
350	455.814	2.70445	0.144295	11.8123	3.37239e-32	2.35094e-30	ENSG00000178607	2081	ERN1
351	182.506	3.84781	0.241204	11.8067	3.60509e-32	2.506e-30	ENSG00000237596	NA
352	376.017	-2.5462	0.13102	-11.8012	3.84764e-32	2.667e-30	ENSG00000169991	126917	IFFO2
353	777.86	-3.80073	0.237355	-11.7998	3.91357e-32	2.70502e-30	ENSG00000198053	140885	SIRPA
354	792.909	-2.44252	0.122296	-11.7953	4.12745e-32	2.84479e-30	ENSG00000176788	10409	BASP1
355	911.906	-2.37685	0.11676	-11.7921	4.28549e-32	2.9454e-30	ENSG00000182985	23705	CADM1
356	376.446	-2.61679	0.137141	-11.7892	4.43691e-32	3.0409e-30	ENSG00000214717	9189	ZBED1
357	953.545	-2.47012	0.124898	-11.7705	5.5382e-32	3.78506e-30	ENSG00000168461	11031	RAB31
358	299.244	-2.92483	0.163586	-11.7665	5.80916e-32	3.95915e-30	ENSG00000128849	84952	CGNL1
359	2715.46	2.34773	0.114737	11.7462	7.38467e-32	5.0189e-30	ENSG00000162298	84447	SYVN1
360	150.307	-3.10933	0.179669	-11.7401	7.94115e-32	5.38212e-30	ENSG00000074047	2736	GLI2
361	1028.34	-3.87195	0.244735	-11.735	8.43692e-32	5.70228e-30	ENSG00000013588	9052	GPRC5A
362	394.931	-2.55022	0.132316	-11.716	1.05496e-31	7.11052e-30	ENSG00000180340	2535	FZD2
363	158.6	5.62206	0.39453	11.7154	1.0634e-31	7.14762e-30	ENSG00000272405	NA
364	7857.87	1.78729	0.0672066	11.7145	1.07384e-31	7.198e-30	ENSG00000168374	378	ARF4
365	254.237	3.11709	0.180757	11.7124	1.10153e-31	7.36334e-30	ENSG00000187266	2057	EPOR
366	626.746	2.39664	0.119294	11.7075	1.16669e-31	7.75643e-30	ENSG00000163683	201895	SMIM14
367	760.754	-4.09511	0.26437	-11.7075	1.16662e-31	7.75643e-30	ENSG00000138623	8482	SEMA7A
368	77.169	-5.41237	0.376917	-11.7065	1.18057e-31	7.82739e-30	ENSG00000249669	NA	CARMN
369	292.819	3.08139	0.177821	11.705	1.20177e-31	7.94633e-30	ENSG00000168038	54986	ULK4
370	310.857	-2.75347	0.150028	-11.6876	1.47433e-31	9.72218e-30	ENSG00000102781	84056	KATNAL1
371	317.226	2.74636	0.149629	11.6713	1.78747e-31	1.17554e-29	ENSG00000179454	54813	KLHL28
372	2331.9	-4.71458	0.318758	-11.6533	2.20692e-31	1.44749e-29	ENSG00000157613	90993	CREB3L1
373	571.969	-2.4902	0.127888	-11.6524	2.23164e-31	1.45978e-29	ENSG00000152465	9397	NMT2
374	820.155	-3.69971	0.231787	-11.6474	2.36641e-31	1.5438e-29	ENSG00000075223	10512	SEMA3C
375	1206.03	2.1879	0.102094	11.6353	2.72527e-31	1.77317e-29	ENSG00000012171	7869	SEMA3B
376	826.348	2.12242	0.0964788	11.6339	2.7729e-31	1.79936e-29	ENSG00000197780	6884	TAF13
377	1162.37	-2.40295	0.120645	-11.6288	2.94371e-31	1.90513e-29	ENSG00000173559	64859	NABP1
378	483.877	-2.38027	0.118765	-11.6219	3.19067e-31	2.05406e-29	ENSG00000119403	26147	PHF19
379	1248.07	2.38101	0.118827	11.622	3.18432e-31	2.05406e-29	ENSG00000179094	5187	PER1
380	5889.95	1.70058	0.0603452	11.6095	3.68804e-31	2.36801e-29	ENSG00000136628	2058	EPRS1
381	247.393	-3.01874	0.17401	-11.6013	4.06058e-31	2.60037e-29	ENSG00000203805	196051	PLPP4
382	610.707	2.5063	0.130086	11.5793	5.24805e-31	3.35202e-29	ENSG00000114395	11068	CYB561D2
383	911.985	2.12416	0.0973002	11.5535	7.08525e-31	4.51365e-29	ENSG00000244405	NA	ETV5
384	124.616	-3.43701	0.210998	-11.5499	7.38904e-31	4.69492e-29	ENSG00000164619	168667	BMPER
385	1430.14	-2.03118	0.0895095	-11.5203	1.04206e-30	6.60396e-29	ENSG00000107438	9124	PDLIM1
386	2597.29	-2.36817	0.118794	-11.5172	1.0802e-30	6.82795e-29	ENSG00000205542	NA	TMSB4X
387	184.16	-2.8173	0.157808	-11.5158	1.09791e-30	6.92194e-29	ENSG00000105011	55723	ASF1B
388	144.801	-3.22428	0.193193	-11.5133	1.13123e-30	7.11364e-29	ENSG00000157542	NA	KCNJ6
389	963.006	-2.51117	0.131374	-11.5028	1.27688e-30	8.00889e-29	ENSG00000166851	5347	PLK1
390	1373.73	2.00109	0.0870741	11.4969	1.36696e-30	8.55194e-29	ENSG00000164934	25879	DCAF13
391	200.97	3.61408	0.227378	11.4967	1.37133e-30	8.55731e-29	ENSG00000260852	283932	FBXL19-AS1
392	547.717	2.45205	0.126574	11.472	1.82469e-30	1.13573e-28	ENSG00000178381	90637	ZFAND2A
393	683.577	-3.81545	0.245609	-11.4631	2.02068e-30	1.25452e-28	ENSG00000197256	25959	KANK2
394	384.204	-2.58788	0.138553	-11.4604	2.08449e-30	1.29085e-28	ENSG00000127124	59269	HIVEP3
395	1574.86	-2.00717	0.0879001	-11.4581	2.14151e-30	1.3228e-28	ENSG00000153904	23576	DDAH1
396	1814.02	-1.94085	0.0821897	-11.4473	2.42692e-30	1.49532e-28	ENSG00000075340	119	ADD2
397	313.424	-2.73781	0.151999	-11.4331	2.8586e-30	1.75685e-28	ENSG00000125520	NA	SLC2A4RG
398	305.235	-5.81101	0.420866	-11.4312	2.92025e-30	1.79023e-28	ENSG00000135074	8728	ADAM19
399	700.94	2.08935	0.095364	11.423	3.20835e-30	1.96192e-28	ENSG00000081177	55218	EXD2
400	1416.3	-4.17253	0.277834	-11.4188	3.36877e-30	2.05486e-28	ENSG00000145632	10769	PLK2
401	448.916	-2.51394	0.132716	-11.4074	3.83914e-30	2.33594e-28	ENSG00000149218	NA	ENDOD1
402	855.645	2.16284	0.10195	11.406	3.90473e-30	2.36994e-28	ENSG00000146085	4594	MMUT
403	77.9493	-4.27733	0.287911	-11.3831	5.07437e-30	3.0722e-28	ENSG00000273760	NA
404	723.228	-2.11885	0.0986336	-11.3434	7.9935e-30	4.82756e-28	ENSG00000019144	23187	PHLDB1
405	518.811	2.41664	0.124911	11.3412	8.20247e-30	4.94153e-28	ENSG00000197779	347344	ZNF81
406	101.595	-3.52073	0.222291	-11.3397	8.33968e-30	5.01182e-28	ENSG00000156381	122416	ANKRD9
407	431.162	2.44933	0.127815	11.3393	8.37824e-30	5.02262e-28	ENSG00000155275	NA	TRMT44
408	1127.3	-3.08821	0.184272	-11.3322	9.09281e-30	5.43763e-28	ENSG00000197747	6281	S100A10
409	703.495	-2.3922	0.122987	-11.3199	1.04564e-29	6.23777e-28	ENSG00000104332	6422	SFRP1
410	614.964	2.23661	0.109367	11.307	1.2115e-29	7.20958e-28	ENSG00000119878	9419	CRIPT
411	164.094	-6.07884	0.449481	-11.2994	1.32192e-29	7.84759e-28	ENSG00000189057	374393	FAM111B
412	715.16	-2.04397	0.0924369	-11.2939	1.40685e-29	8.33149e-28	ENSG00000132780	4678	NASP
413	10288.6	1.66389	0.0588119	11.2883	1.49877e-29	8.85435e-28	ENSG00000113013	3313	HSPA9
414	453.255	-2.23494	0.109543	-11.2735	1.77333e-29	1.04259e-27	ENSG00000138031	109	ADCY3
415	163.211	-3.24762	0.199368	-11.2737	1.76908e-29	1.04259e-27	ENSG00000145287	51316	PLAC8
416	1639.56	-2.16254	0.103139	-11.2716	1.81312e-29	1.06116e-27	ENSG00000169604	84168	ANTXR1
[truncated: 28,580 more rows]

## Sheet: Output_DESeq2_AnTT_vs_γ-T3
	baseMean	log2FoldChange	lfcSE	stat	pvalue	padj
[truncated: 28,879 more rows]

## Sheet: Output_DESeq2_AnTT_vs_δ-T3
	baseMean	log2FoldChange	lfcSE	stat	pvalue	padj
[truncated: 28,879 more rows]

[truncated: 1 more sheets: Output_DESeq2_δ-T3_vs_γ-T3]
