# Supplementary material for: Transcriptomic Analysis of the Anticancer Effects of Annatto Tocotrienol, Delta-Tocotrienol and Gamma-Tocotrienol on Chondrosarcoma Cells
Source: Nutrients. 2022 Oct 13;14(20):4277. doi: 10.3390/nu14204277 (PMC9611384; doi:10.3390/nu14204277)
Supplement: Supplementary file 1 [file nutrients-14-04277-s001.zip › S5 - GO terms for up- and downregulated DEGs.xlsx]

## Sheet: result_table_enrichGO
	Cluster	group	legend	ONTOLOGY	ID	Description	GeneRatio	BgRatio	pvalue	p.adjust	qvalue	geneID	Count
1	downregulated.Antt vs VC	Downregulated	Antt vs VC	BP	GO:0007015	Actin filament organization	82/1101	450/18800	1.73607e-20	9.16995e-17	6.92237e-17	ACTR3/DBN1/PAWR/LPAR1/TPM4/PXN/ROCK2/MICAL2/KIRREL1/MYO1E/VASP/CORO1C/MYO1B/FHOD3/SWAP70/GSN/EMP2/MICAL3/BCAR1/ARPIN/HMCN1/ASAP3/ACTN1/SPTAN1/EPS8/PDLIM1/NF2/ADD2/ENAH/BAIAP2/MCU/LIMCH1/FERMT2/ZYX/SRF/RHOBTB3/FSCN1/SHANK3/CCDC88A/TMOD2/ARHGAP28/CIT/FAT1/MARCKS/FAM171A1/WDR1/SMAD3/CARMIL2/CDC42EP3/SHROOM2/HIP1/RHOB/DAAM2/F2RL1/NEDD9/FHDC1/STMN1/SORBS2/TGFB3/CGNL1/PLEKHG2/FMN2/PHLDB2/RFLNB/S100A10/…	82
2	downregulated.Antt vs VC	Downregulated	Antt vs VC	BP	GO:0061572	Actin filament bundle organization	44/1101	162/18800	3.20472e-18	8.46367e-15	6.3892e-15	PAWR/LPAR1/PXN/ROCK2/MYO1B/SWAP70/ASAP3/ACTN1/EPS8/PDLIM1/NF2/ADD2/BAIAP2/LIMCH1/FERMT2/ZYX/SRF/FSCN1/SHANK3/CCDC88A/ARHGAP28/MARCKS/FAM171A1/SMAD3/NEDD9/FHDC1/STMN1/TGFB3/CGNL1/FMN2/PHLDB2/RFLNB/S100A10/SYNPO/ACTG1/EZR/LIMA1/ID1/CALD1/TPM1/CCN2/S1PR1/ZNF664-RFLNA/SYNPO2L	44
3	downregulated.Antt vs VC	Downregulated	Antt vs VC	BP	GO:0065004	Protein-dna complex assembly	48/1101	203/18800	4.40059e-17	5.8397e-14	4.40837e-14	UBTF/H1-4/ATF7IP/H2BC12/HMGB2/MCM2/CENPE/CENPA/CHAF1A/H4C12/DLGAP5/CENPX/HMGB1/H4C3/H2BC5/SOX9/H4C8/H2BC21/GMNN/THRA/CENPF/H4C11/H4C14/H3C10/NASP/H2BC6/BAZ1A/H2BC13/H4C15/H3C15/H3C14/H3C2/CENPI/H4C2/RAD51/H2BC11/H2AX/CHAF1B/H2BC18/H3C1/ASF1B/H3C3/HELLS/H2BC17/TCF4/H2BC3/H2BC14/H2BC1	48
4	downregulated.Antt vs VC	Downregulated	Antt vs VC	BP	GO:0051017	Actin filament bundle assembly	42/1101	158/18800	4.42234e-17	5.8397e-14	4.40837e-14	PAWR/LPAR1/PXN/ROCK2/MYO1B/SWAP70/ASAP3/ACTN1/EPS8/PDLIM1/NF2/ADD2/BAIAP2/LIMCH1/FERMT2/ZYX/SRF/FSCN1/SHANK3/CCDC88A/ARHGAP28/MARCKS/FAM171A1/SMAD3/NEDD9/FHDC1/STMN1/TGFB3/CGNL1/FMN2/PHLDB2/S100A10/SYNPO/ACTG1/EZR/LIMA1/ID1/CALD1/TPM1/CCN2/S1PR1/SYNPO2L	42
5	downregulated.Antt vs VC	Downregulated	Antt vs VC	BP	GO:0031032	Actomyosin structure organization	45/1101	199/18800	2.52994e-15	2.67263e-12	2.01756e-12	EPB41L2/LPAR1/PXN/ROCK2/FHOD3/ECT2/ASAP3/FRMD5/MYH9/PDLIM1/NF2/LIMCH1/FERMT2/ZYX/SRF/ANKRD1/CCDC88A/TMOD2/ARHGAP28/CIT/FAM171A1/WDR1/SMAD3/NKX2-5/CNN3/CNN2/FHDC1/STMN1/ANLN/TGFB3/CGNL1/PHLDB2/FRMD6/S100A10/FRMD3/ACTG1/PDGFRB/TPM1/CCN2/LDB3/S1PR1/SYNPO2L/CNN1/MYPN/EDN1	45
6	downregulated.Antt vs VC	Downregulated	Antt vs VC	BP	GO:0001667	Ameboidal-type cell migration	74/1101	480/18800	1.58268e-14	1.39328e-11	1.05179e-11	ANXA6/NRP2/TNS1/IQSEC1/PXN/ROCK2/RIN2/CORO1C/EMP2/STARD13/PRR5L/HIF1A/BCAR1/MYH9/TGFB1/PDLIM1/HMGB1/HBEGF/EPHA2/HYAL2/NOTCH1/JCAD/SOX9/SMURF2/AKAP12/SRF/BMPR2/PIK3CD/AMOTL2/PLXND1/HSPB1/PDGFB/EGF/RHOB/FSTL1/DAAM2/FOXC2/PKN3/TBXA2R/LAMA5/BMPER/ANLN/WNT7A/SLC8A1/PITX2/NR2F2/GLUL/ATP2B4/VEGFC/SEMA7A/EFNB2/ARID5B/PIK3R3/KITLG/KANK1/PLPP3/GLIPR2/ID1/RHOJ/KANK2/SEMA3C/CCBE1/THBS1/SOX18/ACTA2/MACIR/FGF1…	74
7	downregulated.Antt vs VC	Downregulated	Antt vs VC	BP	GO:0006334	Nucleosome assembly	34/1101	126/18800	2.68534e-14	1.81519e-11	1.37029e-11	H1-4/H2BC12/HMGB2/MCM2/CHAF1A/H4C12/H4C3/H2BC5/SOX9/H4C8/H2BC21/H4C11/H4C14/H3C10/NASP/H2BC6/BAZ1A/H2BC13/H4C15/H3C15/H3C14/H3C2/H4C2/H2BC11/H2AX/CHAF1B/H2BC18/H3C1/ASF1B/H3C3/H2BC17/H2BC3/H2BC14/H2BC1	34
8	downregulated.Antt vs VC	Downregulated	Antt vs VC	BP	GO:0071824	Protein-dna complex subunit organization	48/1101	237/18800	2.74925e-14	1.81519e-11	1.37029e-11	UBTF/H1-4/ATF7IP/H2BC12/HMGB2/MCM2/CENPE/CENPA/CHAF1A/H4C12/DLGAP5/CENPX/HMGB1/H4C3/H2BC5/SOX9/H4C8/H2BC21/GMNN/THRA/CENPF/H4C11/H4C14/H3C10/NASP/H2BC6/BAZ1A/H2BC13/H4C15/H3C15/H3C14/H3C2/CENPI/H4C2/RAD51/H2BC11/H2AX/CHAF1B/H2BC18/H3C1/ASF1B/H3C3/HELLS/H2BC17/TCF4/H2BC3/H2BC14/H2BC1	48
9	downregulated.Antt vs VC	Downregulated	Antt vs VC	BP	GO:0000280	Nuclear division	70/1101	446/18800	3.37436e-14	1.98038e-11	1.49498e-11	ACTR3/NCAPG2/PDS5B/NEK6/SMC4/CCNB2/KIF23/BUB1B/TEX11/RAD54L/KNSTRN/TACC3/KIF18A/CENPE/NCAPH/SPAG5/RMI1/KIF4A/NUF2/PSRC1/EPS8/DLGAP5/CENPX/NEK2/CDCA8/XRCC3/FANCA/CCNB1/CDC25C/AURKB/KIFC1/HASPIN/INCENP/CDC20/CENPF/UBE2C/PTTG1/FBXO5/CDCA2/MYBL2/CDC14A/PDGFB/EGF/ESPL1/TOP2A/ASPM/HOXA13/CDC25B/MKI67/ANLN/RAD51/SHOC1/MSX2/KLHDC8B/SPDL1/ZWINT/FMN2/BRME1/PLK1/KIF18B/PDGFRB/PKMYT1/RAD54B/BRIP1/CAV2/MYBL1/…	70
10	downregulated.Antt vs VC	Downregulated	Antt vs VC	BP	GO:0072001	Renal system development	55/1101	312/18800	1.65249e-13	8.72846e-11	6.5891e-11	MYO1E/GDF11/SDC1/PTCH1/WFS1/PDGFA/TNS2/HYAL2/NOTCH1/SOX9/PODXL/FOXD1/GLI3/NOTCH3/PLCE1/CENPF/SMAD3/LHX1/BASP1/PLXND1/PDGFB/GLI2/IRX3/SERPINB7/COL4A1/FOXC2/GCNT1/LAMA5/BMPER/BICC1/WNT7B/CD24/GFRA1/SMAD6/EFNB2/ID3/ARID5B/PDGFRB/NKX3-1/SIX2/HELLS/KANK2/FGFR2/SALL1/ACTA2/KIRREL3/FGF1/PRDM1/SOX4/PCSK9/LGR4/LIN28A/TGFB2/LGR5/BMP4	55
11	downregulated.Antt vs VC	Downregulated	Antt vs VC	BP	GO:0048285	Organelle fission	73/1101	493/18800	1.93162e-13	9.1567e-11	6.91237e-11	ACTR3/NCAPG2/PDS5B/NEK6/SMC4/CCNB2/KIF23/BUB1B/CORO1C/TEX11/RAD54L/KNSTRN/TACC3/KIF18A/CENPE/NCAPH/SPAG5/RMI1/KIF4A/NUF2/PSRC1/EPS8/DLGAP5/CENPX/NEK2/CDCA8/XRCC3/FANCA/CCNB1/CDC25C/AURKB/MCU/KIFC1/HASPIN/INCENP/CDC20/CENPF/UBE2C/PTTG1/INF2/FBXO5/CDCA2/MYBL2/CDC14A/PDGFB/EGF/ESPL1/TOP2A/ASPM/HOXA13/CDC25B/MKI67/ANLN/RAD51/SHOC1/MSX2/KLHDC8B/SPDL1/ZWINT/FMN2/BRME1/PLK1/KIF18B/PDGFRB/PKMYT1/RAD54B/B…	73
12	downregulated.Antt vs VC	Downregulated	Antt vs VC	BP	GO:0001655	Urogenital system development	59/1101	352/18800	2.08028e-13	9.1567e-11	6.91237e-11	EPHB2/MYO1E/GDF11/SDC1/RARG/PTCH1/WFS1/PDGFA/TNS2/HYAL2/NOTCH1/SOX9/PODXL/FOXD1/GLI3/NOTCH3/PLCE1/FKBP4/CENPF/SMAD3/LHX1/BASP1/PLXND1/PDGFB/GLI2/IRX3/SERPINB7/COL4A1/FOXC2/GCNT1/HOXA13/LAMA5/BMPER/BICC1/WNT7B/CD24/GFRA1/SMAD6/EFNB2/ID3/ARID5B/PDGFRB/NKX3-1/SIX2/HELLS/KANK2/FGFR2/SALL1/ACTA2/KIRREL3/FGF1/PRDM1/SOX4/PCSK9/LGR4/LIN28A/TGFB2/LGR5/BMP4	59
13	downregulated.Antt vs VC	Downregulated	Antt vs VC	BP	GO:0032970	Regulation of actin filament-based process	63/1101	393/18800	2.52922e-13	1.02764e-10	7.75765e-11	DBN1/LPAR1/PXN/ROCK2/KIRREL1/CACNA1C/VASP/FHOD3/SWAP70/GSN/ECT2/ARPIN/ASAP3/MYH9/IQGAP3/SPTAN1/EPS8/PDGFA/NF2/ADD2/BAIAP2/LIMCH1/HCN4/FERMT2/RHOBTB3/FSCN1/SHANK3/CCDC88A/TMOD2/ARHGAP28/CIT/WDR1/SMAD3/CARMIL2/CDC42EP3/CNN2/RHOB/DAAM2/F2RL1/DIXDC1/STMN1/TGFB3/CGNL1/PLEKHG2/PHLDB2/FRMD6/S100A10/SYNPO/ACTG1/KANK1/PDGFRB/ADORA1/NTF3/LIMA1/ID1/TPM1/ACTA2/CCN2/RGS4/S1PR1/CAV1/SYNPO2L/EDN1	63
14	downregulated.Antt vs VC	Downregulated	Antt vs VC	BP	GO:0001822	Kidney development	53/1101	303/18800	6.31434e-13	2.38231e-10	1.7984e-10	MYO1E/GDF11/SDC1/PTCH1/WFS1/PDGFA/TNS2/HYAL2/NOTCH1/SOX9/PODXL/FOXD1/GLI3/NOTCH3/PLCE1/CENPF/SMAD3/LHX1/BASP1/PLXND1/PDGFB/GLI2/IRX3/SERPINB7/FOXC2/GCNT1/LAMA5/BMPER/BICC1/WNT7B/CD24/GFRA1/SMAD6/EFNB2/ID3/ARID5B/PDGFRB/NKX3-1/SIX2/HELLS/KANK2/FGFR2/SALL1/ACTA2/KIRREL3/FGF1/PRDM1/SOX4/PCSK9/LGR4/LIN28A/TGFB2/BMP4	53
15	downregulated.Antt vs VC	Downregulated	Antt vs VC	BP	GO:0098813	Nuclear chromosome segregation	51/1101	287/18800	9.26938e-13	3.26406e-10	2.46403e-10	ACTR3/NCAPG2/PDS5B/NEK6/SMC4/KIF23/BUB1B/TEX11/KNSTRN/TACC3/KIF18A/CENPE/ECT2/NCAPH/SPAG5/KNL1/RMI1/KIF4A/NUF2/PSRC1/ESCO2/DLGAP5/CENPX/NEK2/CDCA8/XRCC3/CCNB1/AURKB/KIFC1/HASPIN/INCENP/CDC20/CENPF/UBE2C/PTTG1/FBXO5/ESPL1/TOP2A/SPC24/SHOC1/KLHDC8B/SPDL1/AXIN2/ZWINT/FMN2/SPC25/PLK1/KIF18B/FAM83D/BRIP1/CCNE2	51
16	downregulated.Antt vs VC	Downregulated	Antt vs VC	BP	GO:0006260	Dna replication	50/1101	280/18800	1.28334e-12	4.23662e-10	3.19822e-10	NUCKS1/PCNA/JADE1/LPIN1/TICRR/CDAN1/MCM3/MCM2/RMI1/CHAF1A/ATAD5/ESCO2/CENPX/TIMELESS/MMS22L/ZNF365/BLM/POLE/GMNN/PRIM1/CCDC88A/DTL/PTMS/NASP/FBXO5/DNA2/BAZ1A/PCLAF/GINS1/EGF/GLI2/PIF1/BCAR3/TONSL/GINS2/RAD51/RRM2/JADE2/CCNA2/NFIB/MCM5/CDK1/CHAF1B/ID3/CDC7/E2F8/CDK2/MCM10/CCNE2/FAM111B	50
17	downregulated.Antt vs VC	Downregulated	Antt vs VC	BP	GO:0044772	Mitotic cell cycle phase transition	66/1101	440/18800	1.57876e-12	4.9053e-10	3.703e-10	JADE1/NEK6/CLSPN/CCNB2/CDKN2B/TICRR/BUB1B/CALM3/DACT1/MELK/TACC3/CENPE/IQGAP3/ATAD5/EPS8/DLGAP5/XRCC3/CTDSPL/MIIP/CCNB1/CDC25C/FOXM1/AURKB/RBL1/BLM/CDKN3/EZH2/POLE/CDK6/CENPF/GTSE1/UBE2C/CDKN2C/FOXN3/DTL/NABP1/CIT/NASP/SKP2/FBXO5/CDC14A/ESPL1/CDC25A/CDC25B/CCND1/ERCC2/ANLN/RRM2/SPDL1/CCNA2/ZWINT/CDK1/KLF11/WEE1/PLK1/CDC7/FHL1/PKMYT1/CCNF/KANK2/CDK2/E2F1/INHBA/CCNE2/PLK2/LZTS1	66
18	downregulated.Antt vs VC	Downregulated	Antt vs VC	BP	GO:0001503	Ossification	64/1101	420/18800	1.69946e-12	4.98696e-10	3.76465e-10	CBFB/TPM4/MN1/CRIM1/SUFU/HIF1A/PTCH1/TGFB1/EPHA2/TCIRG1/RRAS2/BCOR/NOTCH1/ADAMTS12/SOX9/FERMT2/FASN/CCN1/GLI3/BMPR2/THRA/CDK6/RUNX2/KLF10/EBP/SMAD3/FBXO5/BAMBI/SLC24A3/FHL2/XYLT1/GLI2/FAM20C/FOXC2/DHRS3/RIOX1/SNAI2/ERCC2/SLC8A1/TGFB3/MSX2/WNT7B/VEGFC/AXIN2/SEMA7A/SMAD6/ID3/PDLIM7/RFLNB/TENT5A/SIX2/CDH11/FGFR2/ADRB2/CCN2/S1PR1/FGFR3/ZNF664-RFLNA/CREB3L1/WNT3/LGR4/TGFB2/DLX5/BMP4	64
19	downregulated.Antt vs VC	Downregulated	Antt vs VC	BP	GO:0031497	Chromatin assembly	41/1101	205/18800	3.24795e-12	9.02929e-10	6.81619e-10	H1-4/ATF7IP/H2BC12/CDAN1/HMGB2/MCM2/CHAF1A/H4C12/H4C3/H2BC5/SOX9/H4C8/EZH2/H2BC21/TET1/H4C11/H4C14/H3C10/NASP/H2BC6/BAZ1A/H2BC13/H4C15/H3C15/H3C14/H3C2/H4C2/H2BC11/H2AX/SAMD1/CHAF1B/H2BC18/H3C1/ASF1B/H3C3/HELLS/CDK2/H2BC17/H2BC3/H2BC14/H2BC1	41
20	downregulated.Antt vs VC	Downregulated	Antt vs VC	BP	GO:0090130	Tissue migration	58/1101	366/18800	3.7289e-12	9.84802e-10	7.43424e-10	NRP2/IQSEC1/PXN/ROCK2/RIN2/CORO1C/EMP2/STARD13/HIF1A/BCAR1/MYH9/TGFB1/HMGB1/HBEGF/EPHA2/NOTCH1/JCAD/SOX9/SRF/BMPR2/PIK3CD/PLXND1/HSPB1/PDGFB/EGF/RHOB/FSTL1/DAAM2/FOXC2/PKN3/TBXA2R/BMPER/ANLN/WNT7A/NR2F2/GLUL/ATP2B4/VEGFC/EFNB2/PIK3R3/KANK1/PLPP3/GLIPR2/ID1/RHOJ/KANK2/CCBE1/THBS1/SOX18/ACTA2/FGF1/FGFBP1/ATOH8/PLK2/TGFB2/CARD10/EDN1/BMP4	58
21	downregulated.Antt vs VC	Downregulated	Antt vs VC	BP	GO:0010631	Epithelial cell migration	57/1101	358/18800	4.71765e-12	1.1866e-09	8.95763e-10	NRP2/IQSEC1/PXN/ROCK2/RIN2/CORO1C/EMP2/STARD13/HIF1A/BCAR1/MYH9/TGFB1/HMGB1/HBEGF/EPHA2/NOTCH1/JCAD/SOX9/SRF/BMPR2/PIK3CD/PLXND1/HSPB1/PDGFB/EGF/RHOB/FSTL1/DAAM2/FOXC2/PKN3/TBXA2R/BMPER/ANLN/WNT7A/NR2F2/GLUL/ATP2B4/VEGFC/EFNB2/PIK3R3/KANK1/PLPP3/GLIPR2/ID1/RHOJ/KANK2/CCBE1/THBS1/SOX18/FGF1/FGFBP1/ATOH8/PLK2/TGFB2/CARD10/EDN1/BMP4	57
22	downregulated.Antt vs VC	Downregulated	Antt vs VC	BP	GO:0048732	Gland development	64/1101	431/18800	5.45903e-12	1.31066e-09	9.89417e-10	PLXNA1/CAPN1/PCNA/CCNB2/CDKN2B/STAT5B/RARG/CADM1/HIF1A/PTCH1/IQGAP3/TGFB1/IGSF3/PDGFA/TBX2/EPHA2/NOTCH1/SOX9/FASN/SRF/EZH2/GLI3/THRA/FKBP4/SOCS2/DDR1/CIT/CITED2/PITX1/SMAD3/PLXND1/NKX2-5/EGF/GLI2/SLC29A1/RPS6KA1/SNAI2/ZNF703/HOXA13/LAMA5/CCND1/APLN/TGFB3/MSX2/TYMS/PITX2/WNT7B/NFIB/TGFBR3/ARID5B/NKX3-1/E2F8/FGFR2/SEMA3C/SALL1/FGF1/CAV1/WNT3/PCSK9/NRG1/TGFB2/OXTR/EDN1/BMP4	64
23	downregulated.Antt vs VC	Downregulated	Antt vs VC	BP	GO:0090132	Epithelium migration	57/1101	361/18800	6.67303e-12	1.53248e-09	1.15686e-09	NRP2/IQSEC1/PXN/ROCK2/RIN2/CORO1C/EMP2/STARD13/HIF1A/BCAR1/MYH9/TGFB1/HMGB1/HBEGF/EPHA2/NOTCH1/JCAD/SOX9/SRF/BMPR2/PIK3CD/PLXND1/HSPB1/PDGFB/EGF/RHOB/FSTL1/DAAM2/FOXC2/PKN3/TBXA2R/BMPER/ANLN/WNT7A/NR2F2/GLUL/ATP2B4/VEGFC/EFNB2/PIK3R3/KANK1/PLPP3/GLIPR2/ID1/RHOJ/KANK2/CCBE1/THBS1/SOX18/FGF1/FGFBP1/ATOH8/PLK2/TGFB2/CARD10/EDN1/BMP4	57
24	downregulated.Antt vs VC	Downregulated	Antt vs VC	BP	GO:0140014	Mitotic nuclear division	50/1101	293/18800	7.38744e-12	1.62585e-09	1.22735e-09	NCAPG2/PDS5B/NEK6/SMC4/KIF23/BUB1B/KNSTRN/TACC3/KIF18A/CENPE/NCAPH/SPAG5/KIF4A/NUF2/PSRC1/EPS8/DLGAP5/NEK2/CDCA8/XRCC3/CCNB1/CDC25C/AURKB/KIFC1/HASPIN/CDC20/CENPF/UBE2C/PTTG1/FBXO5/CDCA2/MYBL2/CDC14A/PDGFB/EGF/ESPL1/HOXA13/MKI67/ANLN/KLHDC8B/SPDL1/ZWINT/PLK1/KIF18B/PDGFRB/PKMYT1/CAV2/MISP/EDN1/BMP4	50
25	downregulated.Antt vs VC	Downregulated	Antt vs VC	BP	GO:0060562	Epithelial tube morphogenesis	53/1101	328/18800	1.50694e-11	3.07102e-09	2.31831e-09	MICAL2/VASP/RARG/STARD13/SUFU/HIF1A/PTCH1/TGFB1/TIMELESS/TBX2/EPHA2/NOTCH1/ADAMTS12/SOX9/PODXL/FOXD1/LUZP1/SRF/GLI3/DDR1/CITED2/PIK3CD/SMAD3/LHX1/PLXND1/NKX2-5/EGF/GLI2/IRX3/RHOB/COL4A1/FZD2/FOXC2/LAMA5/MSX2/EFNB2/PRICKLE1/NKX3-1/SIX2/FGFR2/SHROOM3/TEAD2/LHX2/SOX18/SALL1/FGF1/SOX4/LGR4/TGFB2/LGR5/HHIP/EDN1/BMP4	53
26	downregulated.Antt vs VC	Downregulated	Antt vs VC	BP	GO:0007059	Chromosome segregation	55/1101	348/18800	1.51167e-11	3.07102e-09	2.31831e-09	ACTR3/NCAPG2/PDS5B/NEK6/SMC4/KIF23/BUB1B/TEX11/KNSTRN/TACC3/KIF18A/CENPE/ECT2/NCAPH/SPAG5/KNL1/RMI1/KIF4A/NUF2/PSRC1/ESCO2/DLGAP5/CENPX/NEK2/CDCA8/XRCC3/CCNB1/AURKB/KIFC1/SKA2/HASPIN/INCENP/CDC20/CENPF/UBE2C/PTTG1/FBXO5/CDCA2/ESPL1/TOP2A/MKI67/SPC24/ERCC2/SHOC1/KLHDC8B/SPDL1/AXIN2/ZWINT/FMN2/SPC25/PLK1/KIF18B/FAM83D/BRIP1/CCNE2	55
27	downregulated.Antt vs VC	Downregulated	Antt vs VC	BP	GO:0032956	Regulation of actin cytoskeleton organization	55/1101	352/18800	2.38396e-11	4.66373e-09	3.52064e-09	DBN1/LPAR1/PXN/ROCK2/KIRREL1/VASP/FHOD3/SWAP70/GSN/ECT2/ARPIN/ASAP3/IQGAP3/SPTAN1/EPS8/PDGFA/NF2/ADD2/BAIAP2/LIMCH1/FERMT2/RHOBTB3/FSCN1/SHANK3/CCDC88A/TMOD2/ARHGAP28/CIT/WDR1/SMAD3/CARMIL2/CDC42EP3/RHOB/DAAM2/F2RL1/DIXDC1/STMN1/TGFB3/CGNL1/PLEKHG2/PHLDB2/S100A10/SYNPO/ACTG1/KANK1/PDGFRB/NTF3/LIMA1/ID1/TPM1/CCN2/RGS4/S1PR1/SYNPO2L/EDN1	55
28	downregulated.Antt vs VC	Downregulated	Antt vs VC	BP	GO:0003205	Cardiac chamber development	35/1101	167/18800	3.1707e-11	5.9813e-09	4.51527e-09	PPP1R13L/NRP2/NSD2/NDST1/IGF1R/SUFU/HIF1A/TGFB1/TBX2/NOTCH1/CCN1/LUZP1/SRF/BMPR2/CITED2/PLXND1/NKX2-5/FHL2/ADGRG6/FZD2/FOXC2/DHRS3/HOXA13/MSX2/TGFBR3/SMAD6/FGFR2/SEMA3C/SALL1/TPM1/PRDM1/SOX4/NRG1/TGFB2/BMP4	35
29	downregulated.Antt vs VC	Downregulated	Antt vs VC	BP	GO:0034728	Nucleosome organization	34/1101	159/18800	3.38404e-11	6.16362e-09	4.6529e-09	H1-4/H2BC12/HMGB2/MCM2/CHAF1A/H4C12/H4C3/H2BC5/SOX9/H4C8/H2BC21/H4C11/H4C14/H3C10/NASP/H2BC6/BAZ1A/H2BC13/H4C15/H3C15/H3C14/H3C2/H4C2/H2BC11/H2AX/CHAF1B/H2BC18/H3C1/ASF1B/H3C3/H2BC17/H2BC3/H2BC14/H2BC1	34
30	downregulated.Antt vs VC	Downregulated	Antt vs VC	BP	GO:0006335	Dna replication-dependent chromatin assembly	15/1101	32/18800	6.56273e-11	1.08752e-08	8.20969e-09	CHAF1A/H4C12/H4C3/H4C8/H4C11/H4C14/H3C10/NASP/H4C15/H3C2/H4C2/CHAF1B/H3C1/ASF1B/H3C3	15
31	downregulated.Antt vs VC	Downregulated	Antt vs VC	BP	GO:0034723	Dna replication-dependent chromatin organization	15/1101	32/18800	6.56273e-11	1.08752e-08	8.20969e-09	CHAF1A/H4C12/H4C3/H4C8/H4C11/H4C14/H3C10/NASP/H4C15/H3C2/H4C2/CHAF1B/H3C1/ASF1B/H3C3	15
32	downregulated.Antt vs VC	Downregulated	Antt vs VC	BP	GO:0007346	Regulation of mitotic cell cycle	66/1101	478/18800	6.65254e-11	1.08752e-08	8.20969e-09	JADE1/NEK6/CLSPN/CDKN2B/TICRR/MEIS2/BUB1B/MAP3K20/DACT1/STAT5B/TTLL12/CENPE/PTCH1/ATAD5/DLGAP5/NEK2/XRCC3/CTDSPL/MIIP/CCNB1/CDC25C/AURKB/RBL1/BLM/EZH2/GMNN/CENPF/GTSE1/UBE2C/CDKN2C/FOXN3/DTL/NABP1/FBXO5/CDCA2/CDC14A/PDGFB/EGF/ESPL1/CDC25A/HOXA13/CDC25B/MKI67/CCND1/ERCC2/ANLN/RRM2/SPDL1/ZWINT/CDK1/WEE1/PLK1/CDC7/FHL1/PDGFRB/NKX3-1/PKMYT1/USP2/KANK2/CDK2/E2F1/CAV2/INHBA/PLK2/EDN1/BMP4	66
33	downregulated.Antt vs VC	Downregulated	Antt vs VC	BP	GO:0060485	Mesenchyme development	49/1101	301/18800	6.79445e-11	1.08752e-08	8.20969e-09	ANXA6/NRP2/TCOF1/ROCK2/CORO1C/TGFB1I1/HIF1A/TGFB1/PHLDB1/TBX2/NOTCH1/SOX9/FERMT2/FOXD1/EZH2/BMPR2/BNC2/CITED2/SMAD3/BAMBI/BASP1/NKX2-5/FOXC2/SNAI2/ZNF703/LAMA5/TGFB3/MSX2/PITX2/AXIN2/SEMA7A/TGFBR3/PHLDB2/RFLNB/RBM24/KITLG/FOXF2/PDGFRB/SIX2/FAM83D/GLIPR2/FGFR2/SEMA3C/TEAD2/ACTA2/NRG1/TGFB2/EDN1/BMP4	49
34	downregulated.Antt vs VC	Downregulated	Antt vs VC	BP	GO:0003007	Heart morphogenesis	44/1101	254/18800	8.13162e-11	1.26327e-08	9.5364e-09	PPP1R13L/NRP2/NSD2/MICAL2/SUFU/HIF1A/PTCH1/TGFB1/TBX2/NOTCH1/SOX9/CCN1/SRF/BMPR2/ANKRD1/FLRT2/CITED2/SMAD3/PLXND1/NKX2-5/FHL2/ADGRG6/FZD2/FOXC2/DHRS3/SNAI2/MSX2/PITX2/AXIN2/TGFBR3/SMAD6/ALPK2/FGFR2/SEMA3C/TEAD2/SOX18/TPM1/S1PR1/SOX4/SYNPO2L/NRG1/TGFB2/EDN1/BMP4	44
35	downregulated.Antt vs VC	Downregulated	Antt vs VC	BP	GO:0042060	Wound healing	61/1101	429/18800	1.07215e-10	1.61803e-08	1.22145e-08	ANXA6/CD44/TYRO3/AXL/EPHB2/DGKH/SDC1/AJUBA/HIF1A/MYH9/DST/AJAP1/TGFB1/PDGFA/FZD7/HBEGF/MRTFA/FERMT2/CCN1/SRF/RAP2B/GLI3/GAS6/MYLK/SYTL4/DDR1/SMAD3/ACTB/HSPB1/PDGFB/CARMIL2/CNN2/FOXC2/F2RL1/TBXA2R/ANXA8/WNT7A/ST3GAL4/TGFB3/PLAT/MSX2/IL24/VCL/SERPINE1/PHLDB2/F2R/ACTG1/KANK1/PDGFRB/PLPP3/WNT5B/FGFR2/THBS1/TPM1/ACTA2/FGF1/CAV1/NRG1/TGFB2/F3/EDN1	61
36	downregulated.Antt vs VC	Downregulated	Antt vs VC	BP	GO:0016055	Wnt signaling pathway	63/1101	452/18800	1.22848e-10	1.80246e-08	1.36067e-08	JADE1/GRK6/TMEM237/SDC1/DACT1/TGFB1I1/RARG/TGFB1/FZD7/RBMS3/NOTCH1/DEPDC1B/TBL1XR1/SOX9/FERMT2/SMURF2/GLI3/FZD4/TLE3/TMEM131L/MDFIC/SMAD3/MITF/BAMBI/AMOTL2/APCDD1L/NKX2-5/VANGL1/EGF/ASPM/FZD2/DAAM2/DIXDC1/RECK/SNAI2/ZNF703/CCND1/WNT7A/BICC1/NXN/WNT7B/CD24/AXIN2/PRICKLE1/PRICKLE2/KANK1/TCF7L1/PLPP3/LYPD6/ALPK2/WNT5B/FGFR2/SALL1/TLE4/CTNND2/NKD1/CAV1/SOX4/WNT3/LGR4/DLX5/LGR5/EDN1	63
37	downregulated.Antt vs VC	Downregulated	Antt vs VC	BP	GO:0198738	Cell-cell signaling by wnt	63/1101	454/18800	1.479e-10	2.11137e-08	1.59387e-08	JADE1/GRK6/TMEM237/SDC1/DACT1/TGFB1I1/RARG/TGFB1/FZD7/RBMS3/NOTCH1/DEPDC1B/TBL1XR1/SOX9/FERMT2/SMURF2/GLI3/FZD4/TLE3/TMEM131L/MDFIC/SMAD3/MITF/BAMBI/AMOTL2/APCDD1L/NKX2-5/VANGL1/EGF/ASPM/FZD2/DAAM2/DIXDC1/RECK/SNAI2/ZNF703/CCND1/WNT7A/BICC1/NXN/WNT7B/CD24/AXIN2/PRICKLE1/PRICKLE2/KANK1/TCF7L1/PLPP3/LYPD6/ALPK2/WNT5B/FGFR2/SALL1/TLE4/CTNND2/NKD1/CAV1/SOX4/WNT3/LGR4/DLX5/LGR5/EDN1	63
38	downregulated.Antt vs VC	Downregulated	Antt vs VC	BP	GO:0048608	Reproductive structure development	61/1101	433/18800	1.57173e-10	2.18471e-08	1.64923e-08	TYRO3/AXL/SDC1/TEX11/HMGB2/STAT5B/FANCG/RARG/KIF18A/HIF1A/NSDHL/PTCH1/PDGFA/FANCA/NOTCH1/SOCS3/SOX9/TFAP2C/CCN1/RHOBTB3/GLI3/BMPR2/FZD4/FKBP4/DHCR24/PLCD3/PLK4/CITED2/HS6ST1/NASP/LHX1/BASP1/BOK/PDGFB/ASPM/MAMLD1/HOXA13/CCND1/WNT7A/WNT7B/NR2F2/GFRA1/ARID5B/KITLG/FOXF2/PDGFRB/NKX3-1/E2F8/CCNF/FGFR2/FST/BRIP1/SALL1/ADAM19/ITGB8/INHBA/PRDM1/LGR4/TGFB2/LFNG/BMP4	61
39	downregulated.Antt vs VC	Downregulated	Antt vs VC	BP	GO:0043542	Endothelial cell migration	46/1101	279/18800	1.689e-10	2.28751e-08	1.72684e-08	NRP2/PXN/ROCK2/RIN2/EMP2/STARD13/HIF1A/BCAR1/MYH9/TGFB1/HMGB1/EPHA2/NOTCH1/JCAD/SRF/BMPR2/PIK3CD/PLXND1/HSPB1/PDGFB/EGF/RHOB/FSTL1/FOXC2/TBXA2R/BMPER/WNT7A/NR2F2/GLUL/ATP2B4/VEGFC/EFNB2/PIK3R3/PLPP3/ID1/RHOJ/CCBE1/THBS1/SOX18/FGF1/FGFBP1/ATOH8/PLK2/CARD10/EDN1/BMP4	46
40	downregulated.Antt vs VC	Downregulated	Antt vs VC	BP	GO:0061448	Connective tissue development	44/1101	260/18800	1.77982e-10	2.35025e-08	1.7742e-08	EFEMP1/ANXA6/CD44/RARG/MBOAT2/HIF1A/TGFB1/HYAL2/NOTCH1/ADAMTS12/TGFBI/TBL1XR1/SOX9/FOXD1/CCN1/SRF/GLI3/BMPR2/THRA/RUNX2/PITX1/SMAD3/PDGFB/SERPINB7/FOXC2/SNAI2/WNT7A/MSX2/TYMS/WNT7B/NFIB/AXIN2/ARID5B/RFLNB/PDGFRB/SIX2/WNT5B/ACTA2/CCN2/ITGB8/FGFR3/ZNF664-RFLNA/EDN1/BMP4	44
41	downregulated.Antt vs VC	Downregulated	Antt vs VC	BP	GO:0110053	Regulation of actin filament organization	45/1101	270/18800	1.85451e-10	2.38916e-08	1.80357e-08	DBN1/LPAR1/PXN/ROCK2/KIRREL1/VASP/FHOD3/SWAP70/GSN/ARPIN/ASAP3/SPTAN1/EPS8/NF2/ADD2/BAIAP2/LIMCH1/FERMT2/SHANK3/CCDC88A/TMOD2/ARHGAP28/CIT/WDR1/SMAD3/CARMIL2/CDC42EP3/DAAM2/F2RL1/STMN1/TGFB3/CGNL1/PLEKHG2/PHLDB2/S100A10/SYNPO/ACTG1/KANK1/LIMA1/ID1/TPM1/CCN2/RGS4/S1PR1/SYNPO2L	45
42	downregulated.Antt vs VC	Downregulated	Antt vs VC	BP	GO:0061458	Reproductive system development	61/1101	436/18800	2.08564e-10	2.62295e-08	1.98005e-08	TYRO3/AXL/SDC1/TEX11/HMGB2/STAT5B/FANCG/RARG/KIF18A/HIF1A/NSDHL/PTCH1/PDGFA/FANCA/NOTCH1/SOCS3/SOX9/TFAP2C/CCN1/RHOBTB3/GLI3/BMPR2/FZD4/FKBP4/DHCR24/PLCD3/PLK4/CITED2/HS6ST1/NASP/LHX1/BASP1/BOK/PDGFB/ASPM/MAMLD1/HOXA13/CCND1/WNT7A/WNT7B/NR2F2/GFRA1/ARID5B/KITLG/FOXF2/PDGFRB/NKX3-1/E2F8/CCNF/FGFR2/FST/BRIP1/SALL1/ADAM19/ITGB8/INHBA/PRDM1/LGR4/TGFB2/LFNG/BMP4	61
43	downregulated.Antt vs VC	Downregulated	Antt vs VC	BP	GO:1901987	Regulation of cell cycle phase transition	59/1101	415/18800	2.19388e-10	2.6949e-08	2.03437e-08	JADE1/NEK6/CLSPN/CDKN2B/TICRR/BUB1B/MAP3K20/MN1/DACT1/CENPE/ATAD5/DLGAP5/TIMELESS/XRCC3/CTDSPL/MIIP/CCNB1/TBX2/ATF5/CDC25C/AURKB/RBL1/BLM/EZH2/CENPF/GTSE1/UBE2C/CDKN2C/FOXN3/DTL/NABP1/FBXO5/DNA2/CDC14A/ESPL1/CDC25A/CDC25B/CCND1/ERCC2/ANLN/RRM2/H2AX/SPDL1/ATP2B4/ZWINT/CDK1/WEE1/PLK1/CDC7/FHL1/NKX3-1/WDR76/FAM83D/KANK2/CDK2/E2F1/BRIP1/INHBA/PLK2	59
44	downregulated.Antt vs VC	Downregulated	Antt vs VC	BP	GO:0030900	Forebrain development	55/1101	376/18800	3.0952e-10	3.71564e-08	2.80493e-08	NRP2/TYRO3/AXL/CNP/EPHB2/NDST1/IGF1R/TACC3/BTBD3/PHLPP2/HIF1A/MDGA1/NF2/ATF5/NIN/NOTCH1/NUMBL/SRF/EZH2/DLX1/GLI3/NOTCH3/SHANK3/CDK6/SSTR2/NEFL/NRGN/PITX1/LHX1/GLI2/ASPM/PLXNA4/DIXDC1/TOX/WNT7A/SLC8A1/H2AX/PITX2/WNT7B/NR2F2/ATP2B4/NFIB/SEMA7A/CNTNAP2/FGFR2/E2F1/LHX2/SALL1/KIRREL3/DCLK2/INHBA/NRG1/OXTR/DLX5/BMP4	55
45	downregulated.Antt vs VC	Downregulated	Antt vs VC	BP	GO:0045786	Negative regulation of cell cycle	56/1101	387/18800	3.23376e-10	3.79572e-08	2.86538e-08	JADE1/CLSPN/CDKN2B/TICRR/BUB1B/MAP3K20/DACT1/KAT2B/PPP1R13B/TGFB1/NEK2/TIMELESS/MAPK12/XRCC3/CTDSPL/MIIP/CCNB1/ATF5/AURKB/RBL1/BLM/EZH2/GMNN/CDK6/CENPF/GTSE1/CDKN2C/FOXN3/PTTG1/DTL/NABP1/FBXO5/DNA2/ESPL1/RHOB/CCND1/H2AX/NR2F2/SPDL1/ZWINT/CDK1/WEE1/PLK1/FHL1/ADCYAP1/NKX3-1/WDR76/E2F8/CCNF/KANK2/CDK2/E2F1/BRIP1/INHBA/PLK2/BMP4	56
46	downregulated.Antt vs VC	Downregulated	Antt vs VC	BP	GO:0010948	Negative regulation of cell cycle process	47/1101	301/18800	6.97273e-10	8.00652e-08	6.0441e-08	JADE1/CLSPN/CDKN2B/TICRR/BUB1B/MAP3K20/DACT1/KAT2B/NEK2/TIMELESS/XRCC3/CTDSPL/MIIP/CCNB1/ATF5/AURKB/RBL1/BLM/EZH2/CENPF/GTSE1/FOXN3/PTTG1/DTL/NABP1/FBXO5/DNA2/ESPL1/CCND1/H2AX/SPDL1/ZWINT/CDK1/WEE1/PLK1/FHL1/NKX3-1/WDR76/E2F8/CCNF/KANK2/CDK2/E2F1/BRIP1/INHBA/PLK2/BMP4	47
47	downregulated.Antt vs VC	Downregulated	Antt vs VC	BP	GO:0060070	Canonical wnt signaling pathway	48/1101	313/18800	8.54279e-10	9.60064e-08	7.2475e-08	JADE1/SDC1/DACT1/RARG/TGFB1/FZD7/RBMS3/NOTCH1/TBL1XR1/SOX9/SMURF2/GLI3/FZD4/TLE3/TMEM131L/SMAD3/MITF/BAMBI/NKX2-5/EGF/ASPM/FZD2/DAAM2/DIXDC1/RECK/SNAI2/ZNF703/WNT7A/BICC1/WNT7B/AXIN2/PRICKLE1/KANK1/TCF7L1/PLPP3/LYPD6/WNT5B/FGFR2/TLE4/CTNND2/NKD1/CAV1/SOX4/WNT3/LGR4/DLX5/LGR5/EDN1	48
48	downregulated.Antt vs VC	Downregulated	Antt vs VC	BP	GO:1902903	Regulation of supramolecular fiber organization	54/1101	376/18800	8.87559e-10	9.76684e-08	7.37297e-08	DBN1/LPAR1/LDLR/PXN/ROCK2/KIRREL1/VASP/FHOD3/SWAP70/GSN/ARPIN/ASAP3/SPTAN1/PSRC1/EPS8/MID1/NF2/ADD2/BAIAP2/NIN/LIMCH1/FERMT2/FKBP4/SHANK3/CRYAB/CCDC88A/TMOD2/ARHGAP28/CIT/WDR1/SMAD3/NAV3/CKAP2/CARMIL2/CDC42EP3/DAAM2/F2RL1/STMN1/TGFB3/CGNL1/PLEKHG2/PHLDB2/S100A10/SYNPO/ACTG1/KANK1/LIMA1/ID1/TPM1/CCN2/RGS4/S1PR1/SYNPO2L/EDN1	54
49	downregulated.Antt vs VC	Downregulated	Antt vs VC	BP	GO:0042692	Muscle cell differentiation	55/1101	387/18800	9.16063e-10	9.87478e-08	7.45445e-08	EHD2/CAPN2/SDC1/FHOD3/ACTN1/MYH9/TGFB1/HDGFL2/MAPK12/FZD7/TBX2/DMD/MRTFA/PDLIM5/PIEZO1/NOTCH1/SOX9/MRTFB/SRF/EZH2/BMPR2/ANKRD1/TMOD2/WDR1/LMNA/SPEG/NKX2-5/PDGFB/FHL2/ACTN4/IRX3/MYORG/SORBS2/SLC8A1/CDK1/EFNB2/RBM24/ACTG1/PDGFRB/BDNF/ADAMTS15/ALPK2/WNT5B/FGFR2/CAV2/ADAM12/TPM1/RGS4/LDB3/SYNPO2L/NRG1/MYPN/RIPOR2/EDN1/BMP4	55
50	downregulated.Antt vs VC	Downregulated	Antt vs VC	BP	GO:0000070	Mitotic sister chromatid segregation	33/1101	171/18800	1.11019e-09	1.17281e-07	8.85351e-08	NCAPG2/PDS5B/NEK6/SMC4/KIF23/BUB1B/KNSTRN/TACC3/KIF18A/CENPE/NCAPH/SPAG5/KIF4A/NUF2/PSRC1/DLGAP5/NEK2/CDCA8/XRCC3/CCNB1/AURKB/KIFC1/HASPIN/CDC20/CENPF/UBE2C/PTTG1/FBXO5/ESPL1/SPDL1/ZWINT/PLK1/KIF18B	33
51	downregulated.Antt vs VC	Downregulated	Antt vs VC	BP	GO:0044839	Cell cycle g2/m phase transition	31/1101	155/18800	1.42242e-09	1.47318e-07	1.1121e-07	CLSPN/CCNB2/TICRR/CALM3/MELK/ATAD5/MIIP/CCNB1/ATF5/CDC25C/FOXM1/AURKB/BLM/CENPF/FOXN3/DTL/NABP1/CIT/SKP2/FBXO5/CDC25A/CDC25B/CCND1/CCNA2/CDK1/WEE1/PLK1/CDC7/FHL1/PKMYT1/CDK2	31
52	downregulated.Antt vs VC	Downregulated	Antt vs VC	BP	GO:0003279	Cardiac septum development	25/1101	106/18800	1.56203e-09	1.55672e-07	1.17517e-07	NRP2/NSD2/NDST1/SUFU/TBX2/NOTCH1/CCN1/LUZP1/BMPR2/CITED2/PLXND1/NKX2-5/FZD2/DHRS3/HOXA13/MSX2/TGFBR3/SMAD6/FGFR2/SEMA3C/SALL1/PRDM1/SOX4/TGFB2/BMP4	25
53	downregulated.Antt vs VC	Downregulated	Antt vs VC	BP	GO:0060840	Artery development	25/1101	106/18800	1.56203e-09	1.55672e-07	1.17517e-07	LDLR/NDST1/SUFU/TBX2/NOTCH1/LUZP1/SRF/GLI3/BMPR2/MYLK/NOTCH3/CITED2/PLXND1/FOXC2/HOXA13/SMAD6/EFNB2/PRICKLE1/PDGFRB/NKX3-1/PRDM1/SOX4/TGFB2/EDN1/BMP4	25
54	downregulated.Antt vs VC	Downregulated	Antt vs VC	BP	GO:0048568	Embryonic organ development	60/1101	449/18800	1.80454e-09	1.7543e-07	1.32432e-07	EFEMP1/PPP1R13L/EPHB2/TEAD1/MICAL2/NDST1/RARG/SUFU/HIF1A/NSDHL/PTCH1/TGFB1/PDGFA/TBX2/EPHA2/NOTCH1/SOCS3/SOX9/CCN1/SRF/GLI3/POLE/RUNX2/PLCD3/PLK4/CITED2/HS6ST1/SMAD3/LHX1/NKX2-5/PDGFB/GLI2/FZD2/FOXC2/PLXNA4/ALX4/TGFB3/PDGFC/PITX2/WNT7B/NR2F2/LRIG3/TEAD4/ID3/KITLG/FOXF2/PBX3/SIX2/E2F8/DLX6/FGFR2/TEAD2/INSIG1/SOX18/SALL1/PRDM1/TGFB2/DLX5/EDN1/BMP4	60
55	downregulated.Antt vs VC	Downregulated	Antt vs VC	BP	GO:0044089	Positive regulation of cellular component biogenesis	64/1101	494/18800	1.82671e-09	1.7543e-07	1.32432e-07	ACTR3/RALB/ATF7IP/EPHB2/COL16A1/LPAR1/ASAP1/PXN/ROCK2/KIRREL1/VASP/SDC1/AJUBA/SWAP70/FNBP1L/NLGN2/SPAG5/TGFB1/PSRC1/EPS8/PHLDB1/NF2/EPHA2/AGRN/BAIAP2/NIN/LIMCH1/PIEZO1/SOX9/FERMT2/SRF/FSCN1/PLCE1/FLRT2/PLK4/CCDC88A/SMAD3/NAV3/EPS8L2/CARMIL2/CDC42EP3/AUTS2/IRX3/F2RL1/TENM2/ANLN/WNT7A/TGFB3/ST8SIA2/PHLDB2/S100A10/SYNPO/PTPRJ/CNTNAP2/BDNF/ID1/CDK2/TPM1/CCN2/CAV1/SYNPO2L/NRG1/OXTR/RIPOR2	64
56	downregulated.Antt vs VC	Downregulated	Antt vs VC	BP	GO:0022612	Gland morphogenesis	27/1101	123/18800	1.9215e-09	1.75437e-07	1.32437e-07	PLXNA1/CAPN1/RARG/PTCH1/TGFB1/PDGFA/TBX2/EPHA2/NOTCH1/SOX9/GLI3/DDR1/PLXND1/RPS6KA1/SNAI2/HOXA13/LAMA5/TGFB3/MSX2/NFIB/NKX3-1/FGFR2/SEMA3C/FGF1/CAV1/TGFB2/BMP4	27
57	downregulated.Antt vs VC	Downregulated	Antt vs VC	BP	GO:0030038	Contractile actin filament bundle assembly	25/1101	107/18800	1.92641e-09	1.75437e-07	1.32437e-07	LPAR1/PXN/ROCK2/ASAP3/PDLIM1/NF2/LIMCH1/FERMT2/ZYX/SRF/CCDC88A/ARHGAP28/FAM171A1/SMAD3/FHDC1/STMN1/TGFB3/CGNL1/PHLDB2/S100A10/ACTG1/TPM1/CCN2/S1PR1/SYNPO2L	25
58	downregulated.Antt vs VC	Downregulated	Antt vs VC	BP	GO:0043149	Stress fiber assembly	25/1101	107/18800	1.92641e-09	1.75437e-07	1.32437e-07	LPAR1/PXN/ROCK2/ASAP3/PDLIM1/NF2/LIMCH1/FERMT2/ZYX/SRF/CCDC88A/ARHGAP28/FAM171A1/SMAD3/FHDC1/STMN1/TGFB3/CGNL1/PHLDB2/S100A10/ACTG1/TPM1/CCN2/S1PR1/SYNPO2L	25
59	downregulated.Antt vs VC	Downregulated	Antt vs VC	BP	GO:0001649	Osteoblast differentiation	40/1101	241/18800	2.14908e-09	1.92397e-07	1.4524e-07	CBFB/TPM4/CRIM1/SUFU/PTCH1/EPHA2/TCIRG1/RRAS2/NOTCH1/SOX9/FERMT2/FASN/CCN1/GLI3/BMPR2/CDK6/RUNX2/SMAD3/FBXO5/BAMBI/FHL2/GLI2/FAM20C/RIOX1/SNAI2/MSX2/WNT7B/VEGFC/AXIN2/SEMA7A/SMAD6/ID3/PDLIM7/TENT5A/FGFR2/CREB3L1/WNT3/LGR4/DLX5/BMP4	40
60	downregulated.Antt vs VC	Downregulated	Antt vs VC	BP	GO:0051216	Cartilage development	35/1101	195/18800	2.64566e-09	2.32906e-07	1.7582e-07	EFEMP1/ANXA6/CD44/RARG/MBOAT2/HIF1A/TGFB1/HYAL2/ADAMTS12/TGFBI/SOX9/CCN1/SRF/GLI3/BMPR2/THRA/RUNX2/PITX1/SMAD3/SNAI2/WNT7A/MSX2/TYMS/WNT7B/NFIB/AXIN2/RFLNB/SIX2/WNT5B/CCN2/ITGB8/FGFR3/ZNF664-RFLNA/EDN1/BMP4	35
61	downregulated.Antt vs VC	Downregulated	Antt vs VC	BP	GO:0000819	Sister chromatid segregation	36/1101	205/18800	2.89759e-09	2.50903e-07	1.89406e-07	NCAPG2/PDS5B/NEK6/SMC4/KIF23/BUB1B/KNSTRN/TACC3/KIF18A/CENPE/NCAPH/SPAG5/KIF4A/NUF2/PSRC1/ESCO2/DLGAP5/NEK2/CDCA8/XRCC3/CCNB1/AURKB/KIFC1/HASPIN/CDC20/CENPF/UBE2C/PTTG1/FBXO5/ESPL1/TOP2A/SPDL1/AXIN2/ZWINT/PLK1/KIF18B	36
62	downregulated.Antt vs VC	Downregulated	Antt vs VC	BP	GO:0003206	Cardiac chamber morphogenesis	27/1101	126/18800	3.36569e-09	2.86735e-07	2.16455e-07	PPP1R13L/NRP2/NSD2/HIF1A/TGFB1/TBX2/NOTCH1/CCN1/SRF/BMPR2/CITED2/NKX2-5/FHL2/ADGRG6/FZD2/FOXC2/DHRS3/MSX2/TGFBR3/SMAD6/FGFR2/SEMA3C/TPM1/SOX4/NRG1/TGFB2/BMP4	27
63	downregulated.Antt vs VC	Downregulated	Antt vs VC	BP	GO:0043410	Positive regulation of mapk cascade	63/1101	491/18800	3.59387e-09	3.01314e-07	2.27461e-07	CD44/LPAR1/TRAF2/ROCK2/NDST1/GADD45B/AJUBA/IGF1R/IQGAP3/TGFB1/MAPKBP1/HMGB1/PDGFA/MID1/FZD7/NOTCH1/JCAD/FERMT2/AKAP12/DENND2B/CSPG4/EZH2/GAS6/FZD4/PLCE1/PDGFB/EGF/F2RL1/DIXDC1/BCAR3/BMPER/WNT7A/TGFB3/PDGFC/WNT7B/CD24/SEMA7A/ACKR3/F2R/KITLG/PDGFRB/ADCYAP1/PTPRJ/ADORA1/NTF3/SH3RF2/ADRA1D/WWC1/GLIPR2/FGFR2/ADRB2/CAV2/THBS1/INAVA/ACTA2/CCN2/FGF1/FGFR3/TNFRSF19/NRG1/TGFB2/EDN1/BMP4	63
64	downregulated.Antt vs VC	Downregulated	Antt vs VC	BP	GO:0003151	Outflow tract morphogenesis	21/1101	80/18800	4.0075e-09	3.30744e-07	2.49678e-07	NRP2/HIF1A/TBX2/NOTCH1/BMPR2/CITED2/PLXND1/NKX2-5/FZD2/FOXC2/DHRS3/MSX2/PITX2/TGFBR3/SMAD6/FGFR2/SEMA3C/SOX18/TGFB2/EDN1/BMP4	21
65	downregulated.Antt vs VC	Downregulated	Antt vs VC	BP	GO:0045667	Regulation of osteoblast differentiation	28/1101	136/18800	4.47381e-09	3.63549e-07	2.74442e-07	CRIM1/SUFU/PTCH1/TCIRG1/NOTCH1/SOX9/FERMT2/CCN1/GLI3/BMPR2/CDK6/RUNX2/SMAD3/FBXO5/BAMBI/FAM20C/RIOX1/SNAI2/MSX2/WNT7B/VEGFC/AXIN2/SMAD6/ID3/PDLIM7/TENT5A/FGFR2/BMP4	28
66	downregulated.Antt vs VC	Downregulated	Antt vs VC	BP	GO:0007389	Pattern specification process	60/1101	463/18800	5.85739e-09	4.65189e-07	3.5117e-07	NRP2/MEIS2/MICAL2/GDF11/RARG/RTTN/SUFU/HIF1A/PTCH1/MID1/TBX2/BCOR/NOTCH1/DZIP1L/HES4/FOXD1/GPR161/SRF/DLX1/GLI3/BMPR2/DOP1B/CITED2/SMAD3/LHX1/BASP1/NKX2-5/HES6/ETS2/GLI2/IRX3/DAAM2/FOXC2/ALX4/WNT7A/MSX2/BICC1/PITX2/WNT7B/NR2F2/AXIN2/SMAD6/NKX3-1/PBX3/SIX2/PKD1L1/ODAD2/FGFR2/SEMA3C/SHROOM3/FST/LHX2/SOX18/NTF4/FGF1/WNT3/LFNG/HHIP/EDN1/BMP4	60
67	downregulated.Antt vs VC	Downregulated	Antt vs VC	BP	GO:1901990	Regulation of mitotic cell cycle phase transition	47/1101	321/18800	5.90073e-09	4.65189e-07	3.5117e-07	JADE1/NEK6/CLSPN/CDKN2B/TICRR/BUB1B/DACT1/CENPE/ATAD5/DLGAP5/XRCC3/CTDSPL/MIIP/CCNB1/CDC25C/AURKB/RBL1/BLM/EZH2/CENPF/GTSE1/UBE2C/CDKN2C/FOXN3/DTL/NABP1/FBXO5/CDC14A/ESPL1/CDC25A/CDC25B/CCND1/ERCC2/ANLN/RRM2/SPDL1/ZWINT/CDK1/WEE1/PLK1/CDC7/FHL1/KANK2/CDK2/E2F1/INHBA/PLK2	47
68	downregulated.Antt vs VC	Downregulated	Antt vs VC	BP	GO:0031589	Cell-substrate adhesion	51/1101	364/18800	6.13017e-09	4.7617e-07	3.5946e-07	CD44/EPDR1/TYRO3/AXL/COL16A1/PXN/ROCK2/RIN2/AJUBA/CORO1C/EMP2/ANTXR1/PEAK1/ACTN1/AJAP1/FZD7/NF2/LIMCH1/NOTCH1/ADAMTS12/PLEKHA2/FERMT2/ZYX/CCN1/SRF/GAS6/FZD4/THSD1/ITGA7/CDK6/DDR1/SMAD3/PDGFB/ACTN4/NEDD9/LAMA5/COL5A3/VCL/SERPINE1/SMAD6/PHLDB2/S100A10/CCDC80/ACTG1/KANK1/PTPRJ/COL8A1/ID1/THBS1/CCN2/GBP1	51
69	downregulated.Antt vs VC	Downregulated	Antt vs VC	BP	GO:0010634	Positive regulation of epithelial cell migration	32/1101	174/18800	6.83098e-09	5.22917e-07	3.94748e-07	NRP2/IQSEC1/ROCK2/RIN2/HIF1A/BCAR1/TGFB1/HMGB1/HBEGF/JCAD/SOX9/BMPR2/PIK3CD/HSPB1/PDGFB/EGF/RHOB/FOXC2/WNT7A/VEGFC/PLPP3/GLIPR2/RHOJ/CCBE1/THBS1/FGF1/FGFBP1/ATOH8/PLK2/TGFB2/EDN1/BMP4	32
70	downregulated.Antt vs VC	Downregulated	Antt vs VC	BP	GO:0032231	Regulation of actin filament bundle assembly	24/1101	106/18800	7.88684e-09	5.95118e-07	4.49253e-07	LPAR1/PXN/ROCK2/SWAP70/ASAP3/NF2/LIMCH1/FERMT2/SHANK3/CCDC88A/ARHGAP28/SMAD3/STMN1/TGFB3/CGNL1/PHLDB2/S100A10/SYNPO/ACTG1/ID1/TPM1/CCN2/S1PR1/SYNPO2L	24
71	downregulated.Antt vs VC	Downregulated	Antt vs VC	BP	GO:0006275	Regulation of dna replication	27/1101	131/18800	8.21115e-09	6.02379e-07	4.54734e-07	NUCKS1/PCNA/JADE1/LPIN1/TICRR/CDAN1/ATAD5/ESCO2/TIMELESS/BLM/GMNN/CCDC88A/FBXO5/DNA2/BAZ1A/GINS1/EGF/GLI2/BCAR3/GINS2/JADE2/CCNA2/CDK1/ID3/CDC7/E2F8/CDK2	27
72	downregulated.Antt vs VC	Downregulated	Antt vs VC	BP	GO:0010595	Positive regulation of endothelial cell migration	27/1101	131/18800	8.21115e-09	6.02379e-07	4.54734e-07	NRP2/ROCK2/RIN2/HIF1A/BCAR1/TGFB1/HMGB1/JCAD/BMPR2/PIK3CD/HSPB1/PDGFB/EGF/RHOB/FOXC2/WNT7A/VEGFC/PLPP3/RHOJ/CCBE1/THBS1/FGF1/FGFBP1/ATOH8/PLK2/EDN1/BMP4	27
73	downregulated.Antt vs VC	Downregulated	Antt vs VC	BP	GO:0061138	Morphogenesis of a branching epithelium	33/1101	185/18800	8.79671e-09	6.28648e-07	4.74565e-07	PLXNA1/PTCH1/TIMELESS/PDGFA/TBX2/EPHA2/NOTCH1/SOCS3/SOX9/FOXD1/SRF/GLI3/DDR1/LHX1/PLXND1/EGF/GLI2/COL4A1/FOXC2/SNAI2/HOXA13/LAMA5/MSX2/NKX3-1/SIX2/FGFR2/SEMA3C/SALL1/FGF1/LGR4/HHIP/EDN1/BMP4	33
74	downregulated.Antt vs VC	Downregulated	Antt vs VC	BP	GO:0000086	G2/m transition of mitotic cell cycle	28/1101	140/18800	8.80726e-09	6.28648e-07	4.74565e-07	CLSPN/TICRR/CALM3/MELK/MIIP/CCNB1/CDC25C/FOXM1/AURKB/BLM/CENPF/FOXN3/DTL/NABP1/CIT/SKP2/FBXO5/CDC25A/CDC25B/CCND1/CCNA2/CDK1/WEE1/PLK1/CDC7/FHL1/PKMYT1/CDK2	28
75	downregulated.Antt vs VC	Downregulated	Antt vs VC	BP	GO:0030111	Regulation of wnt signaling pathway	48/1101	336/18800	9.13839e-09	6.43586e-07	4.85841e-07	JADE1/TMEM237/DACT1/TGFB1/FZD7/RBMS3/NOTCH1/DEPDC1B/TBL1XR1/SOX9/SMURF2/GLI3/FZD4/TLE3/TMEM131L/MDFIC/SMAD3/BAMBI/APCDD1L/NKX2-5/EGF/ASPM/DAAM2/DIXDC1/RECK/SNAI2/ZNF703/BICC1/NXN/AXIN2/PRICKLE1/KANK1/TCF7L1/PLPP3/LYPD6/ALPK2/WNT5B/FGFR2/SALL1/TLE4/CTNND2/NKD1/CAV1/SOX4/WNT3/LGR4/DLX5/LGR5	48
76	downregulated.Antt vs VC	Downregulated	Antt vs VC	BP	GO:0048762	Mesenchymal cell differentiation	39/1101	244/18800	1.01227e-08	7.01204e-07	5.29337e-07	ANXA6/NRP2/TCOF1/ROCK2/CORO1C/TGFB1I1/HIF1A/TGFB1/PHLDB1/NOTCH1/SOX9/FERMT2/EZH2/CITED2/SMAD3/BAMBI/FOXC2/SNAI2/ZNF703/LAMA5/TGFB3/MSX2/PITX2/AXIN2/SEMA7A/TGFBR3/PHLDB2/RFLNB/KITLG/FOXF2/SIX2/FAM83D/GLIPR2/FGFR2/SEMA3C/NRG1/TGFB2/EDN1/BMP4	39
77	downregulated.Antt vs VC	Downregulated	Antt vs VC	BP	GO:0045216	Cell-cell junction organization	35/1101	205/18800	1.0222e-08	7.01204e-07	5.29337e-07	EPHB2/ROCK2/KIRREL1/NLGN2/ECT2/TGFB1/NF2/EPHA2/FERMT2/NUMBL/SRF/FSCN1/NECTIN1/GJC1/WDR1/SMAD3/CDH24/ACTB/IRX3/F2RL1/PLEKHA7/SNAI2/ZNF703/TGFB3/VCL/EFNB2/F2R/ACTG1/CNTNAP2/PKP3/CDH11/INAVA/CTNND2/CAV1/TGFB2	35
78	downregulated.Antt vs VC	Downregulated	Antt vs VC	BP	GO:1901988	Negative regulation of cell cycle phase transition	40/1101	255/18800	1.13328e-08	7.67433e-07	5.79333e-07	JADE1/CLSPN/CDKN2B/TICRR/BUB1B/MAP3K20/DACT1/TIMELESS/XRCC3/CTDSPL/MIIP/CCNB1/ATF5/AURKB/RBL1/BLM/EZH2/CENPF/GTSE1/FOXN3/DTL/NABP1/FBXO5/DNA2/CCND1/H2AX/SPDL1/ZWINT/CDK1/WEE1/PLK1/FHL1/NKX3-1/WDR76/KANK2/CDK2/E2F1/BRIP1/INHBA/PLK2	40
79	downregulated.Antt vs VC	Downregulated	Antt vs VC	BP	GO:0014706	Striated muscle tissue development	39/1101	248/18800	1.60644e-08	1.05985e-06	8.00078e-07	PPP1R13L/FHOD3/TGFB1/FZD7/TBX2/PDLIM5/HCN4/NOTCH1/MRTFB/SRF/CENPF/ANKRD1/GJC1/CITED2/SMAD3/LMNA/NKX2-5/FHL2/IRX3/FOXC2/SORBS2/SLC8A1/MSX2/CDK1/TGFBR3/EFNB2/PDGFRB/ALPK2/FGFR2/SEMA3C/NPPB/JPH2/TPM1/RGS4/S1PR1/NRG1/TGFB2/EDN1/BMP4	39
80	downregulated.Antt vs VC	Downregulated	Antt vs VC	BP	GO:0030879	Mammary gland development	27/1101	135/18800	1.61748e-08	1.05985e-06	8.00078e-07	CAPN1/STAT5B/HIF1A/PTCH1/IQGAP3/TBX2/EPHA2/SOX9/FASN/GLI3/SOCS2/DDR1/EGF/GLI2/SLC29A1/ZNF703/CCND1/APLN/TGFB3/MSX2/WNT7B/FGFR2/CAV1/WNT3/NRG1/OXTR/BMP4	27
81	downregulated.Antt vs VC	Downregulated	Antt vs VC	BP	GO:0001763	Morphogenesis of a branching structure	34/1101	199/18800	1.62529e-08	1.05985e-06	8.00078e-07	PLXNA1/PTCH1/TIMELESS/PDGFA/TBX2/EPHA2/NOTCH1/SOCS3/SOX9/FOXD1/SRF/GLI3/DDR1/LHX1/PLXND1/EGF/GLI2/COL4A1/FOXC2/SNAI2/HOXA13/LAMA5/MSX2/NKX3-1/SIX2/FGFR2/SEMA3C/SALL1/FGF1/PRDM1/LGR4/HHIP/EDN1/BMP4	34
82	downregulated.Antt vs VC	Downregulated	Antt vs VC	BP	GO:0002062	Chondrocyte differentiation	24/1101	110/18800	1.71154e-08	1.10248e-06	8.32261e-07	EFEMP1/ANXA6/RARG/MBOAT2/TGFB1/ADAMTS12/TGFBI/SOX9/GLI3/BMPR2/RUNX2/SMAD3/SNAI2/WNT7A/MSX2/NFIB/AXIN2/RFLNB/SIX2/WNT5B/CCN2/FGFR3/ZNF664-RFLNA/BMP4	24
83	downregulated.Antt vs VC	Downregulated	Antt vs VC	BP	GO:0010632	Regulation of epithelial cell migration	43/1101	290/18800	1.79317e-08	1.14115e-06	8.6145e-07	NRP2/IQSEC1/ROCK2/RIN2/CORO1C/EMP2/STARD13/HIF1A/BCAR1/TGFB1/HMGB1/HBEGF/EPHA2/NOTCH1/JCAD/SOX9/BMPR2/PIK3CD/HSPB1/PDGFB/EGF/RHOB/FOXC2/TBXA2R/BMPER/WNT7A/NR2F2/GLUL/ATP2B4/VEGFC/PLPP3/GLIPR2/RHOJ/CCBE1/THBS1/FGF1/FGFBP1/ATOH8/PLK2/TGFB2/CARD10/EDN1/BMP4	43
84	downregulated.Antt vs VC	Downregulated	Antt vs VC	BP	GO:0010594	Regulation of endothelial cell migration	37/1101	230/18800	2.02223e-08	1.2716e-06	9.59926e-07	NRP2/ROCK2/RIN2/EMP2/STARD13/HIF1A/BCAR1/TGFB1/HMGB1/EPHA2/NOTCH1/JCAD/BMPR2/PIK3CD/HSPB1/PDGFB/EGF/RHOB/FOXC2/TBXA2R/BMPER/WNT7A/NR2F2/GLUL/ATP2B4/VEGFC/PLPP3/RHOJ/CCBE1/THBS1/FGF1/FGFBP1/ATOH8/PLK2/CARD10/EDN1/BMP4	37
85	downregulated.Antt vs VC	Downregulated	Antt vs VC	BP	GO:0007548	Sex differentiation	42/1101	281/18800	2.07429e-08	1.28899e-06	9.73052e-07	TYRO3/AXL/SDC1/TEX11/HMGB2/STAT5B/FANCG/KIF18A/PDGFA/FANCA/SOX9/TFAP2C/RHOBTB3/FZD4/FKBP4/DHCR24/CITED2/NASP/LHX1/BASP1/BOK/ASPM/MAMLD1/CENPI/HOXA13/CCND1/WNT7A/NR2F2/GFRA1/ARID5B/KITLG/FOXF2/PDGFRB/NKX3-1/FST/BRIP1/SALL1/CBX2/INHBA/LGR4/TGFB2/LFNG	42
86	downregulated.Antt vs VC	Downregulated	Antt vs VC	BP	GO:0007517	Muscle organ development	47/1101	334/18800	2.10529e-08	1.29304e-06	9.76113e-07	HMG20B/TGFB1/MAPK12/HBEGF/DMD/NOTCH1/MRTFB/FHL3/MYLK/ITGA7/HIVEP3/CENPF/POU6F1/ANKRD1/CRYAB/CITED2/PITX1/TAGLN/SMAD3/BASP1/SPEG/NKX2-5/SMTN/FZD2/FOXC2/MYORG/ALX4/LAMA5/NR2F2/TEAD4/TGFBR3/ID3/ARID5B/RBM24/FHL1/DES/USP2/FGFR2/JPH2/CAV2/TPM1/S1PR1/CAV1/NRG1/TGFB2/RIPOR2/BMP4	47
87	downregulated.Antt vs VC	Downregulated	Antt vs VC	BP	GO:0048863	Stem cell differentiation	35/1101	211/18800	2.19094e-08	1.33017e-06	1.00415e-06	ANXA6/NRP2/TCOF1/CORO1C/ZNF281/HIF1A/NOTCH1/SOX9/SRF/CDK6/RUNX2/CITED2/PHF19/NKX2-5/FOXC2/SNAI2/LAMA5/ERCC2/WNT7A/MSX2/PITX2/SEMA7A/PRICKLE1/RBM24/KITLG/FGFR2/SEMA3C/TEAD2/SOX18/WNT3/NRG1/LIN28A/TGFB2/EDN1/BMP4	35
88	downregulated.Antt vs VC	Downregulated	Antt vs VC	BP	GO:0001570	Vasculogenesis	20/1101	80/18800	2.31809e-08	1.39138e-06	1.05035e-06	MYO1E/RIN2/EMP2/TGFB1/EPHA2/NOTCH1/FZD4/GJC1/CITED2/NKX2-5/HOXA13/WNT7A/WNT7B/TGFBR3/ACKR3/PDGFRB/TEAD2/SOX18/ITGB8/CAV1	20
89	downregulated.Antt vs VC	Downregulated	Antt vs VC	BP	GO:0002064	Epithelial cell development	34/1101	203/18800	2.71334e-08	1.61032e-06	1.21563e-06	VIM/ROCK2/MYO1E/SDC1/RARG/HIF1A/FOSL2/EPHA2/NOTCH1/SOX9/PODXL/FASN/CDK6/FAT1/PDGFB/FOXC2/F2RL1/HOXA13/WNT7A/TYMS/WNT7B/VCL/ARHGEF26/ROS1/FRMD6/PALLD/SFN/EZR/WNT5B/SHROOM3/SOX18/ACTA2/PRDM1/BMP4	34
90	downregulated.Antt vs VC	Downregulated	Antt vs VC	BP	GO:0051304	Chromosome separation	22/1101	97/18800	3.18458e-08	1.869e-06	1.4109e-06	NEK6/BUB1B/TEX11/TACC3/CENPE/NCAPH/RMI1/DLGAP5/CENPX/XRCC3/CCNB1/AURKB/CENPF/UBE2C/PTTG1/FBXO5/ESPL1/TOP2A/SHOC1/SPDL1/ZWINT/PLK1	22
91	downregulated.Antt vs VC	Downregulated	Antt vs VC	BP	GO:0007411	Axon guidance	37/1101	234/18800	3.22384e-08	1.87124e-06	1.4126e-06	PLXNA1/NRP2/EPHB2/VASP/TRIO/PTCH1/EPHA2/ENAH/NOTCH1/KALRN/FOXD1/GLI3/BMPR2/NOTCH3/NECTIN1/FLRT2/LHX1/FEZ2/PLXND1/GLI2/TUBB3/PLXNA4/EPHB6/LAMA5/NFIB/SEMA7A/EFNB2/PALLD/BDNF/SEMA3C/LHX2/NEXN/WNT3/UNC5C/MYPN/DLX5/EDN1	37
92	downregulated.Antt vs VC	Downregulated	Antt vs VC	BP	GO:0060537	Muscle tissue development	53/1101	405/18800	3.2789e-08	1.88251e-06	1.42111e-06	PPP1R13L/HMG20B/FHOD3/PTCH1/TGFB1/FZD7/TBX2/DMD/PDLIM5/HCN4/NOTCH1/SOX9/MRTFB/SRF/MYLK/ITGA7/HIVEP3/CENPF/ANKRD1/GJC1/CITED2/PITX1/SMAD3/LMNA/NKX2-5/FHL2/IRX3/FOXC2/MYORG/SORBS2/SLC8A1/MSX2/NR2F2/CDK1/TGFBR3/EFNB2/RBM24/PDGFRB/ALPK2/FGFR2/SEMA3C/NPPB/JPH2/CAV2/TPM1/RGS4/S1PR1/CAV1/NRG1/TGFB2/RIPOR2/EDN1/BMP4	53
93	downregulated.Antt vs VC	Downregulated	Antt vs VC	BP	GO:0097485	Neuron projection guidance	37/1101	235/18800	3.61522e-08	2.03578e-06	1.53681e-06	PLXNA1/NRP2/EPHB2/VASP/TRIO/PTCH1/EPHA2/ENAH/NOTCH1/KALRN/FOXD1/GLI3/BMPR2/NOTCH3/NECTIN1/FLRT2/LHX1/FEZ2/PLXND1/GLI2/TUBB3/PLXNA4/EPHB6/LAMA5/NFIB/SEMA7A/EFNB2/PALLD/BDNF/SEMA3C/LHX2/NEXN/WNT3/UNC5C/MYPN/DLX5/EDN1	37
94	downregulated.Antt vs VC	Downregulated	Antt vs VC	BP	GO:0072073	Kidney epithelium development	27/1101	140/18800	3.62294e-08	2.03578e-06	1.53681e-06	MYO1E/GDF11/SDC1/PTCH1/NOTCH1/SOX9/PODXL/FOXD1/GLI3/SMAD3/LHX1/BASP1/IRX3/FOXC2/LAMA5/BMPER/WNT7B/CD24/SMAD6/EFNB2/SIX2/KANK2/FGFR2/SALL1/FGF1/LGR4/BMP4	27
95	downregulated.Antt vs VC	Downregulated	Antt vs VC	BP	GO:0051321	Meiotic cell cycle	40/1101	266/18800	3.78382e-08	2.1038e-06	1.58815e-06	ACTR3/SMC4/CCNB2/BUB1B/TEX11/RAD54L/KIF18A/NCAPH/RMI1/MYH9/NUF2/CENPX/NEK2/FANCA/CDC25C/EXO1/INCENP/CDC20/PTTG1/FBXO5/ESPL1/TOP2A/CDC25A/ASPM/CDC25B/RAD51/SHOC1/MSX2/H2AX/FMN2/BRME1/PLK1/PKMYT1/RAD54B/CDK2/BRIP1/MYBL1/CCNE2/LFNG/EDN1	40
96	downregulated.Antt vs VC	Downregulated	Antt vs VC	BP	GO:0007409	Axonogenesis	55/1101	430/18800	3.98309e-08	2.19153e-06	1.65438e-06	PLXNA1/NRP2/DBN1/CNP/EPHB2/VASP/TRIO/IGF1R/PTCH1/EPHA2/NEFH/ENAH/BAIAP2/NIN/NOTCH1/KALRN/FOXD1/NUMBL/SRF/GLI3/BMPR2/NOTCH3/NECTIN1/FLRT2/NEFL/LHX1/FEZ2/PLXND1/ACTB/GLI2/TUBB3/AUTS2/PLXNA4/DIXDC1/EPHB6/STMN1/LAMA5/WNT7A/VCL/NFIB/SEMA7A/EFNB2/PALLD/BDNF/CDH11/FGFR2/SEMA3C/TIAM2/LHX2/NEXN/WNT3/UNC5C/MYPN/DLX5/EDN1	55
97	downregulated.Antt vs VC	Downregulated	Antt vs VC	BP	GO:1903046	Meiotic cell cycle process	34/1101	207/18800	4.45905e-08	2.40477e-06	1.81536e-06	ACTR3/SMC4/CCNB2/BUB1B/TEX11/RAD54L/KIF18A/NCAPH/RMI1/MYH9/NUF2/CENPX/FANCA/CDC25C/INCENP/CDC20/PTTG1/FBXO5/ESPL1/TOP2A/CDC25A/ASPM/CDC25B/RAD51/SHOC1/MSX2/FMN2/BRME1/PLK1/RAD54B/BRIP1/MYBL1/CCNE2/EDN1	34
98	downregulated.Antt vs VC	Downregulated	Antt vs VC	BP	GO:0021537	Telencephalon development	38/1101	247/18800	4.46172e-08	2.40477e-06	1.81536e-06	EPHB2/IGF1R/TACC3/BTBD3/PHLPP2/HIF1A/MDGA1/NF2/ATF5/NIN/NUMBL/SRF/EZH2/DLX1/GLI3/SHANK3/CDK6/NEFL/NRGN/LHX1/ASPM/PLXNA4/DIXDC1/SLC8A1/H2AX/ATP2B4/NFIB/SEMA7A/CNTNAP2/LHX2/SALL1/KIRREL3/DCLK2/INHBA/NRG1/OXTR/DLX5/BMP4	38
99	downregulated.Antt vs VC	Downregulated	Antt vs VC	BP	GO:0007051	Spindle organization	32/1101	188/18800	4.6783e-08	2.49604e-06	1.88425e-06	NEK6/CCNB2/KIF23/TUBB/KNSTRN/TACC3/CENPE/SPAG5/KIF4A/MYH9/NUF2/PSRC1/DLGAP5/NEK2/CCNB1/AURKB/KIFC1/INCENP/CDC20/FBXO5/STARD9/MYBL2/LIMK2/GNAI1/ESPL1/ASPM/STMN1/SPC25/PLK1/EZR/PLK2/MISP	32
100	downregulated.Antt vs VC	Downregulated	Antt vs VC	BP	GO:0060021	Roof of mouth development	21/1101	91/18800	4.72741e-08	2.49702e-06	1.88499e-06	EPHB2/GDF11/TBX2/BCOR/GLI3/BNC2/FZD2/DHRS3/SNAI2/ALX4/WNT7A/TGFB3/TGFBR3/ARID5B/FOXF2/DLX6/INSIG1/ITGB8/INHBA/TGFB2/DLX5	21
101	downregulated.Antt vs VC	Downregulated	Antt vs VC	BP	GO:0061564	Axon development	59/1101	479/18800	5.00191e-08	2.61585e-06	1.9747e-06	PLXNA1/NRP2/DBN1/CNP/EPHB2/VASP/DHFR/TRIO/IGF1R/PTCH1/EPHA2/NEFH/ENAH/BAIAP2/NIN/NOTCH1/KALRN/FOXD1/NUMBL/SRF/GLI3/BMPR2/NOTCH3/NECTIN1/FLRT2/DDR1/NEFL/LHX1/FEZ2/PLXND1/ACTB/GLI2/TUBB3/AUTS2/PLXNA4/DIXDC1/EPHB6/STMN1/LAMA5/WNT7A/VCL/NFIB/SEMA7A/EFNB2/PALLD/BDNF/NREP/CDH11/FGFR2/SEMA3C/TIAM2/LHX2/NEXN/TSPAN2/WNT3/UNC5C/MYPN/DLX5/EDN1	59
102	downregulated.Antt vs VC	Downregulated	Antt vs VC	BP	GO:0031214	Biomineral tissue development	30/1101	170/18800	5.31566e-08	2.75268e-06	2.07799e-06	ROCK2/HIF1A/TGFB1/TCIRG1/BCOR/NOTCH1/SOX9/CCN1/BMPR2/GAS6/NECTIN1/KLF10/SMAD3/FBXO5/SLC24A3/FAM20C/ERCC2/SLC8A1/TGFB3/MSX2/AXIN2/RFLNB/TENT5A/FGFR2/ADRB2/S1PR1/FGFR3/ZNF664-RFLNA/LGR4/BMP4	30
103	downregulated.Antt vs VC	Downregulated	Antt vs VC	BP	GO:0051146	Striated muscle cell differentiation	41/1101	281/18800	6.06476e-08	3.11011e-06	2.34781e-06	EHD2/CAPN2/SDC1/FHOD3/MYH9/TGFB1/FZD7/PDLIM5/PIEZO1/NOTCH1/SRF/EZH2/ANKRD1/TMOD2/WDR1/LMNA/NKX2-5/FHL2/IRX3/MYORG/SORBS2/SLC8A1/CDK1/EFNB2/RBM24/ACTG1/PDGFRB/BDNF/ADAMTS15/ALPK2/CAV2/ADAM12/TPM1/RGS4/LDB3/SYNPO2L/NRG1/MYPN/RIPOR2/EDN1/BMP4	41
104	downregulated.Antt vs VC	Downregulated	Antt vs VC	BP	GO:0003231	Cardiac ventricle development	25/1101	126/18800	6.43598e-08	3.26873e-06	2.46756e-06	PPP1R13L/NSD2/SUFU/HIF1A/TGFB1/NOTCH1/CCN1/LUZP1/BMPR2/CITED2/NKX2-5/FZD2/FOXC2/HOXA13/TGFBR3/SMAD6/FGFR2/SEMA3C/SALL1/TPM1/PRDM1/SOX4/NRG1/TGFB2/BMP4	25
105	downregulated.Antt vs VC	Downregulated	Antt vs VC	BP	GO:0110020	Regulation of actomyosin structure organization	22/1101	101/18800	6.91259e-08	3.47488e-06	2.62318e-06	LPAR1/PXN/ROCK2/ECT2/ASAP3/NF2/LIMCH1/FERMT2/CCDC88A/ARHGAP28/SMAD3/STMN1/TGFB3/CGNL1/PHLDB2/S100A10/ACTG1/TPM1/CCN2/S1PR1/SYNPO2L/EDN1	22
106	downregulated.Antt vs VC	Downregulated	Antt vs VC	BP	GO:0110148	Biomineralization	30/1101	172/18800	6.97344e-08	3.47488e-06	2.62318e-06	ROCK2/HIF1A/TGFB1/TCIRG1/BCOR/NOTCH1/SOX9/CCN1/BMPR2/GAS6/NECTIN1/KLF10/SMAD3/FBXO5/SLC24A3/FAM20C/ERCC2/SLC8A1/TGFB3/MSX2/AXIN2/RFLNB/TENT5A/FGFR2/ADRB2/S1PR1/FGFR3/ZNF664-RFLNA/LGR4/BMP4	30
107	downregulated.Antt vs VC	Downregulated	Antt vs VC	BP	GO:1901991	Negative regulation of mitotic cell cycle phase transition	31/1101	183/18800	8.4633e-08	4.17786e-06	3.15386e-06	JADE1/CLSPN/CDKN2B/TICRR/BUB1B/DACT1/XRCC3/CTDSPL/MIIP/CCNB1/AURKB/RBL1/BLM/EZH2/CENPF/GTSE1/FOXN3/DTL/NABP1/FBXO5/CCND1/SPDL1/ZWINT/CDK1/WEE1/PLK1/FHL1/KANK2/CDK2/INHBA/PLK2	31
108	downregulated.Antt vs VC	Downregulated	Antt vs VC	BP	GO:0071900	Regulation of protein serine/threonine kinase activity	49/1101	372/18800	8.82015e-08	4.3137e-06	3.2564e-06	RALB/CCNB2/CDKN2B/HMGCR/TRAF2/CALM3/AJUBA/KAT2B/TGFB1/PSRC1/PDGFA/CCNB1/CDC25C/HYAL2/BLM/FERMT2/CDKN3/EZH2/PRKAR2B/BMPR2/FZD4/INCENP/CDKN2C/ACTB/PDGFB/EGF/CDC25A/CCND1/SLC8A1/PDGFC/NR2F2/CD24/ATP2B4/CCNA2/PLK1/KITLG/PDGFRB/PTPRJ/SFN/PKMYT1/NTF3/CCNF/ADRB2/THBS1/FGF1/CAV1/CCNE2/EDN1/BMP4	49
109	downregulated.Antt vs VC	Downregulated	Antt vs VC	BP	GO:0060411	Cardiac septum morphogenesis	18/1101	71/18800	9.20312e-08	4.45971e-06	3.36663e-06	NRP2/NSD2/TBX2/NOTCH1/CCN1/BMPR2/CITED2/NKX2-5/FZD2/DHRS3/MSX2/TGFBR3/SMAD6/FGFR2/SEMA3C/SOX4/TGFB2/BMP4	18
110	downregulated.Antt vs VC	Downregulated	Antt vs VC	BP	GO:0007088	Regulation of mitotic nuclear division	23/1101	111/18800	9.32943e-08	4.47982e-06	3.38181e-06	BUB1B/DLGAP5/NEK2/XRCC3/CCNB1/CDC25C/AURKB/CENPF/FBXO5/CDCA2/PDGFB/EGF/ESPL1/HOXA13/MKI67/SPDL1/ZWINT/PLK1/PDGFRB/PKMYT1/CAV2/EDN1/BMP4	23
111	downregulated.Antt vs VC	Downregulated	Antt vs VC	BP	GO:0033674	Positive regulation of kinase activity	58/1101	476/18800	9.4765e-08	4.50945e-06	3.40417e-06	TYRO3/AXL/RALB/EPHB2/CLSPN/TRAF2/CALM3/AJUBA/IGF1R/EMP2/CENPE/ECT2/TGFB1/PSRC1/PDGFA/CCNB1/HBEGF/EPHA2/FERMT2/CCN1/EZH2/MALT1/BMPR2/GAS6/FZD4/INCENP/CCDC88A/DDR1/MOB3B/PDGFB/EGF/NEDD9/EPHB6/CDC25B/CCND1/PDGFC/CD24/ATP2B4/VEGFC/AXIN2/ROS1/KITLG/PDGFRB/ADCYAP1/ADORA1/NTF3/CAMKK1/FGFR2/ADRB2/IRS1/GPRC5A/THBS1/FGF1/FGFR3/NRG1/TGFB2/CARD10/EDN1	58
112	downregulated.Antt vs VC	Downregulated	Antt vs VC	BP	GO:0045787	Positive regulation of cell cycle	45/1101	329/18800	9.82353e-08	4.63285e-06	3.49732e-06	MEIS2/KIF23/MAP3K20/ROCK2/IGF1R/STAT5B/ECT2/SPAG5/ATAD5/PSRC1/DLGAP5/XRCC3/CCNB1/TBX2/CDC25C/AURKB/EZH2/UBE2C/PLK4/DTL/CIT/CITED2/FBXO5/CDC14A/PDGFB/EGF/ESPL1/CDC25A/HOXA13/CDC25B/CCND1/RRM2/MSX2/CDK1/CDC7/PDGFRB/NKX3-1/E2F8/FAM83D/USP2/FGFR2/CCN2/TGFB2/LFNG/EDN1	45
113	downregulated.Antt vs VC	Downregulated	Antt vs VC	BP	GO:0042476	Odontogenesis	25/1101	130/18800	1.22078e-07	5.70633e-06	4.30769e-06	SDC1/NF2/TCIRG1/BCOR/DLX1/GLI3/NECTIN1/RUNX2/ROGDI/GLI2/FAM20C/LAMA5/TGFB3/MSX2/PITX2/SERPINE1/AXIN2/ID3/FGFR2/FST/TNFRSF11B/INHBA/TGFB2/EDN1/BMP4	25
114	downregulated.Antt vs VC	Downregulated	Antt vs VC	BP	GO:0051056	Regulation of small gtpase mediated signal transduction	42/1101	299/18800	1.24189e-07	5.75408e-06	4.34374e-06	EPHB2/SIPA1L2/IQSEC1/LPAR1/ITPKB/TRIO/SWAP70/ARHGEF40/STARD13/ECT2/ITSN1/ARHGAP11A/EPS8/ARHGAP23/CYTH3/ARHGAP29/FOXM1/NOTCH1/KALRN/ARHGAP31/PLCE1/DOCK2/ARHGAP42/ARHGAP28/EPS8L2/AUTS2/F2RL1/STMN1/CGNL1/STARD8/F2R/KITLG/KANK1/PDGFRB/KANK2/TIAM2/SYNPO2L/NRG1/TGFB2/PLEKHG4/LPAR4/RIPOR2	42
115	downregulated.Antt vs VC	Downregulated	Antt vs VC	BP	GO:0032330	Regulation of chondrocyte differentiation	15/1101	51/18800	1.29026e-07	5.92622e-06	4.47369e-06	EFEMP1/RARG/MBOAT2/ADAMTS12/SOX9/GLI3/RUNX2/SMAD3/SNAI2/AXIN2/RFLNB/SIX2/CCN2/ZNF664-RFLNA/BMP4	15
116	downregulated.Antt vs VC	Downregulated	Antt vs VC	BP	GO:0048736	Appendage development	30/1101	177/18800	1.34597e-07	6.07642e-06	4.58708e-06	MBNL1/MAP3K20/CACNA1C/KAT2B/RARG/PTCH1/TBX2/NOTCH1/SOX9/FERMT2/GLI3/BMPR2/RUNX2/PITX1/RECK/HOXA13/ALX4/WNT7A/MSX2/PITX2/NR2F2/DLX6/FGFR2/SEMA3C/SALL1/SOX4/WNT3/TGFB2/DLX5/BMP4	30
117	downregulated.Antt vs VC	Downregulated	Antt vs VC	BP	GO:0060173	Limb development	30/1101	177/18800	1.34597e-07	6.07642e-06	4.58708e-06	MBNL1/MAP3K20/CACNA1C/KAT2B/RARG/PTCH1/TBX2/NOTCH1/SOX9/FERMT2/GLI3/BMPR2/RUNX2/PITX1/RECK/HOXA13/ALX4/WNT7A/MSX2/PITX2/NR2F2/DLX6/FGFR2/SEMA3C/SALL1/SOX4/WNT3/TGFB2/DLX5/BMP4	30
118	downregulated.Antt vs VC	Downregulated	Antt vs VC	BP	GO:0003281	Ventricular septum development	18/1101	73/18800	1.45682e-07	6.52113e-06	4.92278e-06	NSD2/SUFU/NOTCH1/CCN1/LUZP1/BMPR2/CITED2/NKX2-5/FZD2/HOXA13/TGFBR3/SMAD6/FGFR2/SALL1/PRDM1/SOX4/TGFB2/BMP4	18
119	downregulated.Antt vs VC	Downregulated	Antt vs VC	BP	GO:1902893	Regulation of mirna transcription	16/1101	59/18800	1.72757e-07	7.6681e-06	5.78863e-06	TEAD1/HIF1A/TGFB1/MRTFA/SOX9/MRTFB/SRF/SREBF2/SMAD3/PDGFB/APLN/NFIB/SMAD6/ATOH8/TGFB2/BMP4	16
120	downregulated.Antt vs VC	Downregulated	Antt vs VC	BP	GO:0007265	Ras protein signal transduction	46/1101	347/18800	1.80773e-07	7.91117e-06	5.97213e-06	RALB/EPHB2/HACD3/IQSEC1/LPAR1/ROCK2/ITPKB/STARD13/RAB30/RAB15/IQGAP3/EPS8/CTNNAL1/CYTH3/ARHGAP29/FOXM1/RIPOR1/RRAS2/NOTCH1/RAP2B/PLCE1/DHCR24/ARHGAP42/EPS8L2/CDC42EP3/AUTS2/RHOB/F2RL1/STMN1/DOK1/CCNA2/STARD8/F2R/KITLG/KANK1/PDGFRB/RHOJ/KANK2/KSR2/CDK2/PLK2/SYNPO2L/NRG1/TGFB2/LPAR4/RIPOR2	46
121	downregulated.Antt vs VC	Downregulated	Antt vs VC	BP	GO:0007163	Establishment or maintenance of cell polarity	34/1101	219/18800	1.81229e-07	7.91117e-06	5.97213e-06	ACTR3/ROCK2/IGF1R/GSN/CENPA/MYH9/DST/PDLIM1/TCIRG1/CYTH3/RHOBTB3/FSCN1/DOCK2/FAT1/WDR1/AMOTL2/LMNA/ACTB/LRRC7/CARMIL2/RHOB/MTCL1/WNT7A/WNT7B/SPDL1/ANK1/WEE1/PLK1/KANK1/WWC1/ALPK2/LHX2/MISP/RIPOR2	34
122	downregulated.Antt vs VC	Downregulated	Antt vs VC	BP	GO:0061614	Mirna transcription	16/1101	60/18800	2.22869e-07	9.64912e-06	7.28409e-06	TEAD1/HIF1A/TGFB1/MRTFA/SOX9/MRTFB/SRF/SREBF2/SMAD3/PDGFB/APLN/NFIB/SMAD6/ATOH8/TGFB2/BMP4	16
123	downregulated.Antt vs VC	Downregulated	Antt vs VC	BP	GO:1902749	Regulation of cell cycle g2/m phase transition	22/1101	108/18800	2.42167e-07	1.03046e-05	7.77894e-06	CLSPN/TICRR/ATAD5/MIIP/CCNB1/ATF5/CDC25C/AURKB/BLM/CENPF/FOXN3/DTL/NABP1/FBXO5/CDC25A/CDC25B/CCND1/CDK1/PLK1/CDC7/FHL1/CDK2	22
124	downregulated.Antt vs VC	Downregulated	Antt vs VC	BP	GO:0035051	Cardiocyte differentiation	27/1101	153/18800	2.43862e-07	1.03046e-05	7.77894e-06	FHOD3/TGFB1/FZD7/PDLIM5/NOTCH1/SRF/CITED2/LMNA/NKX2-5/FHL2/IRX3/SORBS2/SLC8A1/PITX2/CDK1/TGFBR3/EFNB2/PRICKLE1/PDGFRB/ALPK2/SEMA3C/SOX18/RGS4/NRG1/TGFB2/EDN1/BMP4	27
125	downregulated.Antt vs VC	Downregulated	Antt vs VC	BP	GO:0048754	Branching morphogenesis of an epithelial tube	27/1101	153/18800	2.43862e-07	1.03046e-05	7.77894e-06	PTCH1/TIMELESS/TBX2/EPHA2/NOTCH1/SOX9/FOXD1/SRF/GLI3/DDR1/LHX1/PLXND1/EGF/GLI2/COL4A1/FOXC2/LAMA5/MSX2/NKX3-1/SIX2/FGFR2/SALL1/FGF1/LGR4/HHIP/EDN1/BMP4	27
126	downregulated.Antt vs VC	Downregulated	Antt vs VC	BP	GO:0007435	Salivary gland morphogenesis	12/1101	34/18800	2.52553e-07	1.05872e-05	7.99224e-06	PLXNA1/TGFB1/PDGFA/PLXND1/SNAI2/LAMA5/TGFB3/NFIB/NKX3-1/FGFR2/SEMA3C/TGFB2	12
127	downregulated.Antt vs VC	Downregulated	Antt vs VC	BP	GO:0034329	Cell junction assembly	52/1101	420/18800	2.64993e-07	1.10212e-05	8.31989e-06	EPHB2/COL16A1/ROCK2/AJUBA/CORO1C/NLGN2/ECT2/PEAK1/ACTN1/DST/MDGA1/ADD2/EPHA2/ZDHHC12/AGRN/LIMCH1/PDLIM5/FERMT2/SRF/FSCN1/SHANK3/THSD1/NECTIN1/FLRT2/GJC1/WDR1/SMAD3/CDH24/PLXND1/ACTB/IRX3/LRFN4/SNAI2/ZNF703/WNT7A/VCL/ST8SIA2/EFNB2/PHLDB2/S100A10/ACTG1/PTPRJ/CNTNAP2/BDNF/PKP3/CDH11/THBS1/KIRREL3/CTNND2/CAV1/NRG1/OXTR	52
128	downregulated.Antt vs VC	Downregulated	Antt vs VC	BP	GO:0051492	Regulation of stress fiber assembly	20/1101	92/18800	2.79653e-07	1.15243e-05	8.69963e-06	LPAR1/PXN/ROCK2/ASAP3/NF2/LIMCH1/FERMT2/CCDC88A/ARHGAP28/SMAD3/STMN1/TGFB3/CGNL1/PHLDB2/S100A10/ACTG1/TPM1/CCN2/S1PR1/SYNPO2L	20
129	downregulated.Antt vs VC	Downregulated	Antt vs VC	BP	GO:0043010	Camera-type eye development	44/1101	330/18800	2.82889e-07	1.15243e-05	8.69963e-06	EFEMP1/PPP1R13L/VIM/EPHB2/CACNA1C/GDF11/RARG/HIF1A/TGIF2/NF2/TBX2/EPHA2/TCIRG1/SOX9/SRF/DLX1/GLI3/BMPR2/FZD4/NECTIN1/CRYAB/CITED2/FAT1/SMAD3/MITF/LHX1/LIMK2/SHROOM2/COL4A1/FOXC2/BCAR3/WNT7A/PITX2/WNT7B/ATP2B4/FOXF2/PDGFRB/COL8A1/RHOJ/WNT5B/LHX2/INHBA/TGFB2/BMP4	44
130	downregulated.Antt vs VC	Downregulated	Antt vs VC	BP	GO:0055001	Muscle cell development	30/1101	183/18800	2.85382e-07	1.15243e-05	8.69963e-06	SDC1/FHOD3/ACTN1/DMD/PDLIM5/NOTCH1/SRF/ANKRD1/TMOD2/WDR1/LMNA/NKX2-5/FHL2/ACTN4/MYORG/SORBS2/SLC8A1/CDK1/ACTG1/PDGFRB/ALPK2/CAV2/TPM1/RGS4/LDB3/SYNPO2L/MYPN/RIPOR2/EDN1/BMP4	30
131	downregulated.Antt vs VC	Downregulated	Antt vs VC	BP	GO:0032233	Positive regulation of actin filament bundle assembly	16/1101	61/18800	2.85815e-07	1.15243e-05	8.69963e-06	LPAR1/PXN/ROCK2/SWAP70/NF2/LIMCH1/FERMT2/CCDC88A/SMAD3/TGFB3/S100A10/SYNPO/ID1/TPM1/CCN2/SYNPO2L	16
132	downregulated.Antt vs VC	Downregulated	Antt vs VC	BP	GO:0072006	Nephron development	26/1101	145/18800	2.93199e-07	1.17324e-05	8.85675e-06	MYO1E/PTCH1/NOTCH1/SOX9/PODXL/FOXD1/GLI3/NOTCH3/PLCE1/LHX1/BASP1/PDGFB/IRX3/SERPINB7/FOXC2/LAMA5/WNT7B/CD24/PDGFRB/SIX2/SALL1/ACTA2/KIRREL3/FGF1/LGR4/BMP4	26
133	downregulated.Antt vs VC	Downregulated	Antt vs VC	BP	GO:0046661	Male sex differentiation	28/1101	164/18800	2.99138e-07	1.188e-05	8.96821e-06	SDC1/TEX11/HMGB2/STAT5B/KIF18A/PDGFA/FANCA/SOX9/TFAP2C/RHOBTB3/FKBP4/DHCR24/CITED2/NASP/BOK/ASPM/MAMLD1/HOXA13/CCND1/GFRA1/ARID5B/KITLG/PDGFRB/NKX3-1/BRIP1/INHBA/LGR4/TGFB2	28
134	downregulated.Antt vs VC	Downregulated	Antt vs VC	BP	GO:0048738	Cardiac muscle tissue development	35/1101	234/18800	3.03108e-07	1.19479e-05	9.01942e-06	PPP1R13L/FHOD3/TGFB1/FZD7/TBX2/PDLIM5/HCN4/NOTCH1/SRF/ANKRD1/GJC1/CITED2/LMNA/NKX2-5/FHL2/IRX3/FOXC2/SORBS2/SLC8A1/MSX2/CDK1/TGFBR3/EFNB2/PDGFRB/ALPK2/FGFR2/NPPB/JPH2/TPM1/RGS4/S1PR1/NRG1/TGFB2/EDN1/BMP4	35
135	downregulated.Antt vs VC	Downregulated	Antt vs VC	BP	GO:0003002	Regionalization	46/1101	354/18800	3.24694e-07	1.2704e-05	9.59019e-06	NRP2/GDF11/RARG/SUFU/PTCH1/NOTCH1/DZIP1L/HES4/FOXD1/GPR161/SRF/DLX1/GLI3/BMPR2/CITED2/SMAD3/LHX1/BASP1/NKX2-5/HES6/ETS2/GLI2/IRX3/FOXC2/ALX4/WNT7A/MSX2/PITX2/WNT7B/NR2F2/AXIN2/SMAD6/NKX3-1/PBX3/SIX2/PKD1L1/FGFR2/SEMA3C/LHX2/NTF4/FGF1/WNT3/LFNG/HHIP/EDN1/BMP4	46
136	downregulated.Antt vs VC	Downregulated	Antt vs VC	BP	GO:0051495	Positive regulation of cytoskeleton organization	31/1101	195/18800	3.66504e-07	1.42344e-05	1.07455e-05	LPAR1/PXN/ROCK2/KIRREL1/VASP/SWAP70/GSN/SPAG5/PSRC1/NF2/BAIAP2/NIN/LIMCH1/FERMT2/PLK4/CCDC88A/WDR1/SMAD3/NAV3/CARMIL2/CDC42EP3/F2RL1/TGFB3/S100A10/SYNPO/NTF3/ID1/TPM1/CCN2/SYNPO2L/EDN1	31
137	downregulated.Antt vs VC	Downregulated	Antt vs VC	BP	GO:0035272	Exocrine system development	14/1101	48/18800	3.79793e-07	1.46428e-05	1.10538e-05	PLXNA1/TGFB1/IGSF3/PDGFA/SOX9/PLXND1/SNAI2/LAMA5/TGFB3/NFIB/NKX3-1/FGFR2/SEMA3C/TGFB2	14
138	downregulated.Antt vs VC	Downregulated	Antt vs VC	BP	GO:0090068	Positive regulation of cell cycle process	36/1101	247/18800	3.94139e-07	1.50858e-05	1.13882e-05	KIF23/MAP3K20/ROCK2/IGF1R/ECT2/SPAG5/ATAD5/DLGAP5/XRCC3/CCNB1/TBX2/CDC25C/AURKB/EZH2/UBE2C/PLK4/DTL/CIT/FBXO5/CDC14A/PDGFB/EGF/ESPL1/CDC25A/HOXA13/CDC25B/CCND1/RRM2/MSX2/CDK1/CDC7/PDGFRB/E2F8/FAM83D/CCN2/EDN1	36
139	downregulated.Antt vs VC	Downregulated	Antt vs VC	BP	GO:0061035	Regulation of cartilage development	17/1101	70/18800	4.07701e-07	1.54523e-05	1.16649e-05	EFEMP1/RARG/MBOAT2/ADAMTS12/SOX9/CCN1/GLI3/BMPR2/RUNX2/SMAD3/SNAI2/AXIN2/RFLNB/SIX2/CCN2/ZNF664-RFLNA/BMP4	17
140	downregulated.Antt vs VC	Downregulated	Antt vs VC	BP	GO:0051302	Regulation of cell division	30/1101	186/18800	4.09564e-07	1.54523e-05	1.16649e-05	KIF23/CALM3/IGF1R/ECT2/PTCH1/TGFB1/PDGFA/AURKB/RBL1/BLM/KIF20A/PLK4/CIT/CDC14A/PDGFB/ASPM/CDC25B/TGFB3/PDGFC/VEGFC/FGF5/PLK1/KIF18B/SFN/NKX3-1/E2F8/FGFR2/FGF1/PLK2/TGFB2	30
141	downregulated.Antt vs VC	Downregulated	Antt vs VC	BP	GO:0051783	Regulation of nuclear division	25/1101	139/18800	4.6495e-07	1.74175e-05	1.31484e-05	BUB1B/DLGAP5/NEK2/XRCC3/CCNB1/CDC25C/AURKB/CDC20/CENPF/FBXO5/CDCA2/PDGFB/EGF/ESPL1/HOXA13/MKI67/MSX2/SPDL1/ZWINT/PLK1/PDGFRB/PKMYT1/CAV2/EDN1/BMP4	25
142	downregulated.Antt vs VC	Downregulated	Antt vs VC	BP	GO:0030282	Bone mineralization	23/1101	121/18800	4.80546e-07	1.7794e-05	1.34326e-05	HIF1A/TGFB1/BCOR/SOX9/CCN1/BMPR2/KLF10/SMAD3/SLC24A3/FAM20C/ERCC2/SLC8A1/TGFB3/AXIN2/RFLNB/TENT5A/FGFR2/ADRB2/S1PR1/FGFR3/ZNF664-RFLNA/LGR4/BMP4	23
143	downregulated.Antt vs VC	Downregulated	Antt vs VC	BP	GO:0090287	Regulation of cellular response to growth factor stimulus	42/1101	314/18800	4.81737e-07	1.7794e-05	1.34326e-05	CDKN2B/CRIM1/TGFB1I1/HIF1A/TGFB1/NOTCH1/ADAMTS12/C20orf27/JCAD/SMURF2/FOXD1/CCN1/DLX1/BMPR2/FZD4/RUNX2/CITED2/SMAD3/BAMBI/FAM20C/FSTL1/ZNF703/HOXA13/BMPER/APLN/TGFB3/MSX2/ATP2B4/VEGFC/TGFBR3/SMAD6/NREP/FST/CCBE1/CAV2/THBS1/FGF1/CAV1/FGFBP1/CREB3L1/HHIP/BMP4	42
144	downregulated.Antt vs VC	Downregulated	Antt vs VC	BP	GO:0007431	Salivary gland development	12/1101	36/18800	5.16856e-07	1.88849e-05	1.42562e-05	PLXNA1/TGFB1/PDGFA/PLXND1/SNAI2/LAMA5/TGFB3/NFIB/NKX3-1/FGFR2/SEMA3C/TGFB2	12
145	downregulated.Antt vs VC	Downregulated	Antt vs VC	BP	GO:0140013	Meiotic nuclear division	30/1101	188/18800	5.18423e-07	1.88849e-05	1.42562e-05	ACTR3/SMC4/CCNB2/BUB1B/TEX11/RAD54L/KIF18A/NCAPH/RMI1/NUF2/CENPX/FANCA/INCENP/CDC20/PTTG1/FBXO5/ESPL1/TOP2A/ASPM/CDC25B/RAD51/SHOC1/MSX2/FMN2/BRME1/PLK1/RAD54B/BRIP1/MYBL1/CCNE2	30
146	downregulated.Antt vs VC	Downregulated	Antt vs VC	BP	GO:0006261	Dna-templated dna replication	27/1101	159/18800	5.41683e-07	1.95971e-05	1.47938e-05	NUCKS1/PCNA/TICRR/MCM3/MCM2/ATAD5/CENPX/TIMELESS/MMS22L/ZNF365/BLM/POLE/GMNN/PRIM1/FBXO5/DNA2/BAZ1A/GINS1/TONSL/GINS2/RAD51/MCM5/CDC7/E2F8/CDK2/MCM10/CCNE2	27
147	downregulated.Antt vs VC	Downregulated	Antt vs VC	BP	GO:0050673	Epithelial cell proliferation	53/1101	443/18800	6.02706e-07	2.16564e-05	1.63484e-05	NRP2/CDKN2B/HMGB2/HIF1A/PTCH1/IQGAP3/TGFB1/HMGB1/FZD7/TBX2/EPHA2/NOTCH1/JCAD/SOX9/BMPR2/CDK6/PIK3CD/SMAD3/PDGFB/EGF/RPS6KA1/SNAI2/ZNF703/CCND1/BMPER/WNT7A/APLN/NR2F2/GLUL/VEGFC/NFIB/TGFBR3/EFNB2/SFN/NKX3-1/COL8A1/ID1/DLX6/FGFR2/FST/CAV2/THBS1/FGF1/CAV1/UHRF1/FGFBP1/ATOH8/LGR4/TGFB2/DLX5/LGR5/F3/BMP4	53
148	downregulated.Antt vs VC	Downregulated	Antt vs VC	BP	GO:0003148	Outflow tract septum morphogenesis	10/1101	25/18800	6.63356e-07	2.36747e-05	1.78719e-05	NRP2/TBX2/BMPR2/NKX2-5/MSX2/SMAD6/FGFR2/SEMA3C/TGFB2/BMP4	10
149	downregulated.Antt vs VC	Downregulated	Antt vs VC	BP	GO:0010389	Regulation of g2/m transition of mitotic cell cycle	20/1101	97/18800	6.89719e-07	2.44503e-05	1.84575e-05	CLSPN/TICRR/MIIP/CCNB1/CDC25C/AURKB/BLM/CENPF/FOXN3/DTL/NABP1/FBXO5/CDC25A/CDC25B/CCND1/CDK1/PLK1/CDC7/FHL1/CDK2	20
150	downregulated.Antt vs VC	Downregulated	Antt vs VC	BP	GO:0035107	Appendage morphogenesis	25/1101	142/18800	7.05323e-07	2.46723e-05	1.8625e-05	MBNL1/MAP3K20/CACNA1C/RARG/PTCH1/TBX2/NOTCH1/SOX9/GLI3/RUNX2/PITX1/RECK/HOXA13/ALX4/WNT7A/MSX2/DLX6/FGFR2/SEMA3C/SALL1/SOX4/WNT3/TGFB2/DLX5/BMP4	25
151	downregulated.Antt vs VC	Downregulated	Antt vs VC	BP	GO:0035108	Limb morphogenesis	25/1101	142/18800	7.05323e-07	2.46723e-05	1.8625e-05	MBNL1/MAP3K20/CACNA1C/RARG/PTCH1/TBX2/NOTCH1/SOX9/GLI3/RUNX2/PITX1/RECK/HOXA13/ALX4/WNT7A/MSX2/DLX6/FGFR2/SEMA3C/SALL1/SOX4/WNT3/TGFB2/DLX5/BMP4	25
152	downregulated.Antt vs VC	Downregulated	Antt vs VC	BP	GO:0010965	Regulation of mitotic sister chromatid separation	16/1101	65/18800	7.31726e-07	2.54275e-05	1.91951e-05	NEK6/BUB1B/TACC3/CENPE/DLGAP5/XRCC3/CCNB1/AURKB/CENPF/UBE2C/PTTG1/FBXO5/ESPL1/SPDL1/ZWINT/PLK1	16
153	downregulated.Antt vs VC	Downregulated	Antt vs VC	BP	GO:0061041	Regulation of wound healing	24/1101	133/18800	7.37263e-07	2.54524e-05	1.9214e-05	EPHB2/AJAP1/PDGFA/HBEGF/FERMT2/MYLK/SMAD3/PDGFB/FOXC2/F2RL1/TBXA2R/ST3GAL4/PLAT/SERPINE1/PHLDB2/F2R/ACTG1/KANK1/PLPP3/THBS1/ACTA2/CAV1/F3/EDN1	24
154	downregulated.Antt vs VC	Downregulated	Antt vs VC	BP	GO:0001656	Metanephros development	19/1101	89/18800	7.43152e-07	2.54892e-05	1.92417e-05	GDF11/PTCH1/PDGFA/SOX9/FOXD1/GLI3/LHX1/BASP1/PDGFB/IRX3/FOXC2/WNT7B/ID3/PDGFRB/NKX3-1/SIX2/SALL1/LGR4/BMP4	19
155	downregulated.Antt vs VC	Downregulated	Antt vs VC	BP	GO:0001837	Epithelial to mesenchymal transition	27/1101	162/18800	7.93368e-07	2.70359e-05	2.04093e-05	TCOF1/ROCK2/TGFB1I1/HIF1A/TGFB1/PHLDB1/NOTCH1/SOX9/FERMT2/EZH2/SMAD3/BAMBI/SNAI2/ZNF703/TGFB3/MSX2/AXIN2/TGFBR3/PHLDB2/RFLNB/FOXF2/FAM83D/GLIPR2/FGFR2/TGFB2/EDN1/BMP4	27
156	downregulated.Antt vs VC	Downregulated	Antt vs VC	BP	GO:0061005	Cell differentiation involved in kidney development	15/1101	58/18800	8.17669e-07	2.75697e-05	2.08123e-05	MYO1E/PTCH1/NOTCH1/PODXL/GLI3/LHX1/BASP1/PDGFB/FOXC2/CD24/SIX2/SALL1/ACTA2/LGR4/BMP4	15
157	downregulated.Antt vs VC	Downregulated	Antt vs VC	BP	GO:0000079	Regulation of cyclin-dependent protein serine/threonine kinase activity	20/1101	98/18800	8.19472e-07	2.75697e-05	2.08123e-05	CCNB2/CDKN2B/KAT2B/PSRC1/CCNB1/CDC25C/BLM/CDKN3/CDKN2C/ACTB/PDGFB/CDC25A/CCND1/NR2F2/CCNA2/PLK1/SFN/PKMYT1/CCNF/CCNE2	20
158	downregulated.Antt vs VC	Downregulated	Antt vs VC	BP	GO:0006338	Chromatin remodeling	37/1101	266/18800	8.8092e-07	2.94495e-05	2.22313e-05	H1-4/H2BC12/KAT2B/HMGB2/MCM2/CHAF1A/H4C12/H4C3/H2BC5/SOX9/H4C8/H2BC21/H4C11/H4C14/H3C10/NASP/H2BC6/ACTB/BAZ1A/H2BC13/H4C15/H3C15/H3C14/H3C2/H4C2/H2BC11/H2AX/CHAF1B/H2BC18/H3C1/ASF1B/H3C3/HELLS/H2BC17/H2BC3/H2BC14/H2BC1	37
159	downregulated.Antt vs VC	Downregulated	Antt vs VC	BP	GO:0032835	Glomerulus development	16/1101	66/18800	9.13837e-07	3.03578e-05	2.2917e-05	MYO1E/NOTCH1/PODXL/NOTCH3/PLCE1/LHX1/BASP1/PDGFB/SERPINB7/FOXC2/CD24/PDGFRB/ACTA2/KIRREL3/LGR4/BMP4	16
160	downregulated.Antt vs VC	Downregulated	Antt vs VC	BP	GO:0001654	Eye development	47/1101	379/18800	9.45729e-07	3.12209e-05	2.35686e-05	EFEMP1/PPP1R13L/VIM/EPHB2/MEIS2/CACNA1C/GDF11/RARG/HIF1A/TGIF2/NF2/TBX2/EPHA2/TCIRG1/SOX9/SRF/DLX1/GLI3/BMPR2/FZD4/NECTIN1/CRYAB/CITED2/FAT1/SMAD3/MITF/LHX1/LIMK2/SHROOM2/COL4A1/FOXC2/BCAR3/WNT7A/PITX2/WNT7B/ATP2B4/FOXF2/PDGFRB/PBX3/COL8A1/RHOJ/WNT5B/LHX2/INHBA/PRDM1/TGFB2/BMP4	47
161	downregulated.Antt vs VC	Downregulated	Antt vs VC	BP	GO:0090066	Regulation of anatomical structure size	56/1101	487/18800	1.04543e-06	3.42978e-05	2.58913e-05	KCNMA1/DBN1/ROCK2/KIRREL1/VASP/FHOD3/SWAP70/GSN/RARG/RIN3/SLC12A9/IQGAP3/SPTAN1/EPS8/ADD2/BAIAP2/SRF/BMPR2/SHANK3/KCNMB1/TMOD2/ARHGAP42/ARHGAP28/NEFL/CIT/WDR1/CARMIL2/KCNN4/CDC42EP3/DAAM2/FOXC2/F2RL1/TBXA2R/PLXNA4/RAB3B/WNT7A/SLC8A1/WNT7B/PLEKHG2/SEMA7A/F2R/KANK1/EZR/ADORA1/BDNF/ADRA1D/LIMA1/ADRB2/SEMA3C/NPPB/ACTA2/CAV1/WNT3/IL7R/OXTR/EDN1	56
162	downregulated.Antt vs VC	Downregulated	Antt vs VC	BP	GO:0070371	Erk1 and erk2 cascade	43/1101	335/18800	1.09047e-06	3.55549e-05	2.68403e-05	CD44/EPHB2/TIMP3/IQGAP3/TGFB1/HMGB1/PDGFA/EPHA2/NOTCH1/SOX9/FERMT2/AKAP12/CCN1/DENND2B/GAS6/PDGFB/EGF/F2RL1/C1QL4/CNKSR3/BMPER/PDGFC/CDK1/SEMA7A/ROS1/ACKR3/SIRPA/F2R/PDGFRB/ADCYAP1/EZR/FAM83D/GLIPR2/FGFR2/ACTA2/CCN2/FGF1/FGFR3/GBP1/NRG1/OXTR/EDN1/BMP4	43
163	downregulated.Antt vs VC	Downregulated	Antt vs VC	BP	GO:1902895	Positive regulation of mirna transcription	13/1101	45/18800	1.11813e-06	3.62327e-05	2.7352e-05	TEAD1/HIF1A/TGFB1/MRTFA/MRTFB/SRF/SREBF2/SMAD3/PDGFB/APLN/SMAD6/ATOH8/TGFB2	13
164	downregulated.Antt vs VC	Downregulated	Antt vs VC	BP	GO:0030278	Regulation of ossification	22/1101	118/18800	1.19427e-06	3.84642e-05	2.90365e-05	HIF1A/TGFB1/BCOR/NOTCH1/SOX9/CCN1/BMPR2/RUNX2/SMAD3/FAM20C/DHRS3/SLC8A1/TGFB3/SMAD6/RFLNB/TENT5A/SIX2/ADRB2/S1PR1/ZNF664-RFLNA/TGFB2/BMP4	22
165	downregulated.Antt vs VC	Downregulated	Antt vs VC	BP	GO:0150063	Visual system development	47/1101	383/18800	1.2749e-06	4.08122e-05	3.0809e-05	EFEMP1/PPP1R13L/VIM/EPHB2/MEIS2/CACNA1C/GDF11/RARG/HIF1A/TGIF2/NF2/TBX2/EPHA2/TCIRG1/SOX9/SRF/DLX1/GLI3/BMPR2/FZD4/NECTIN1/CRYAB/CITED2/FAT1/SMAD3/MITF/LHX1/LIMK2/SHROOM2/COL4A1/FOXC2/BCAR3/WNT7A/PITX2/WNT7B/ATP2B4/FOXF2/PDGFRB/PBX3/COL8A1/RHOJ/WNT5B/LHX2/INHBA/PRDM1/TGFB2/BMP4	47
166	downregulated.Antt vs VC	Downregulated	Antt vs VC	BP	GO:1902905	Positive regulation of supramolecular fiber organization	28/1101	176/18800	1.30991e-06	4.16802e-05	3.14643e-05	LPAR1/PXN/ROCK2/KIRREL1/VASP/SWAP70/GSN/PSRC1/NF2/BAIAP2/NIN/LIMCH1/FERMT2/CCDC88A/WDR1/SMAD3/NAV3/CARMIL2/CDC42EP3/F2RL1/TGFB3/S100A10/SYNPO/ID1/TPM1/CCN2/SYNPO2L/EDN1	28
167	downregulated.Antt vs VC	Downregulated	Antt vs VC	BP	GO:0010810	Regulation of cell-substrate adhesion	32/1101	217/18800	1.32536e-06	4.19194e-05	3.16448e-05	COL16A1/ROCK2/RIN2/CORO1C/EMP2/PEAK1/AJAP1/FZD7/NF2/LIMCH1/NOTCH1/PLEKHA2/FERMT2/CCN1/FZD4/CDK6/DDR1/SMAD3/PDGFB/ACTN4/NEDD9/VCL/SERPINE1/PHLDB2/S100A10/CCDC80/ACTG1/KANK1/PTPRJ/COL8A1/THBS1/GBP1	32
168	downregulated.Antt vs VC	Downregulated	Antt vs VC	BP	GO:0070167	Regulation of biomineral tissue development	20/1101	101/18800	1.35363e-06	4.23071e-05	3.19375e-05	ROCK2/HIF1A/TGFB1/BCOR/NOTCH1/SOX9/CCN1/BMPR2/GAS6/SMAD3/FBXO5/FAM20C/SLC8A1/TGFB3/RFLNB/TENT5A/ADRB2/S1PR1/ZNF664-RFLNA/BMP4	20
169	downregulated.Antt vs VC	Downregulated	Antt vs VC	BP	GO:1904029	Regulation of cyclin-dependent protein kinase activity	20/1101	101/18800	1.35363e-06	4.23071e-05	3.19375e-05	CCNB2/CDKN2B/KAT2B/PSRC1/CCNB1/CDC25C/BLM/CDKN3/CDKN2C/ACTB/PDGFB/CDC25A/CCND1/NR2F2/CCNA2/PLK1/SFN/PKMYT1/CCNF/CCNE2	20
170	downregulated.Antt vs VC	Downregulated	Antt vs VC	BP	GO:0051306	Mitotic sister chromatid separation	16/1101	68/18800	1.40536e-06	4.36653e-05	3.29629e-05	NEK6/BUB1B/TACC3/CENPE/DLGAP5/XRCC3/CCNB1/AURKB/CENPF/UBE2C/PTTG1/FBXO5/ESPL1/SPDL1/ZWINT/PLK1	16
171	downregulated.Antt vs VC	Downregulated	Antt vs VC	BP	GO:0060828	Regulation of canonical wnt signaling pathway	36/1101	261/18800	1.50917e-06	4.66166e-05	3.51907e-05	JADE1/DACT1/TGFB1/FZD7/RBMS3/NOTCH1/TBL1XR1/SOX9/SMURF2/GLI3/FZD4/TLE3/TMEM131L/SMAD3/BAMBI/NKX2-5/EGF/ASPM/DAAM2/RECK/SNAI2/ZNF703/BICC1/AXIN2/PRICKLE1/KANK1/LYPD6/FGFR2/TLE4/CTNND2/NKD1/CAV1/SOX4/LGR4/DLX5/LGR5	36
172	downregulated.Antt vs VC	Downregulated	Antt vs VC	BP	GO:0030198	Extracellular matrix organization	40/1101	307/18800	1.75931e-06	5.40272e-05	4.0785e-05	COL16A1/MYO1E/ZNF469/ANTXR1/HMCN1/FURIN/TGFB1/PHLDB1/NOTCH1/ADAMTS12/TGFBI/SOX9/CCN1/FSCN1/MMP24/GAS6/FLRT2/DDR1/SMAD3/COL4A5/CARMIL2/COL4A1/FOXC2/RECK/BCL3/ERCC2/CRISPLD2/COL5A3/PHLDB2/CCDC80/FOXF2/COL8A1/ADAMTS15/CAV2/CCN2/TNFRSF11B/CAV1/CREB3L1/OLFML2B/TGFB2	40
173	downregulated.Antt vs VC	Downregulated	Antt vs VC	BP	GO:0001657	Ureteric bud development	19/1101	94/18800	1.78845e-06	5.46045e-05	4.12208e-05	GDF11/SDC1/PTCH1/SOX9/FOXD1/GLI3/SMAD3/LHX1/BASP1/FOXC2/LAMA5/BMPER/SMAD6/SIX2/FGFR2/SALL1/FGF1/LGR4/BMP4	19
174	downregulated.Antt vs VC	Downregulated	Antt vs VC	BP	GO:0045740	Positive regulation of dna replication	12/1101	40/18800	1.85489e-06	5.63076e-05	4.25065e-05	PCNA/LPIN1/ATAD5/DNA2/BAZ1A/EGF/GLI2/BCAR3/CDK1/CDC7/E2F8/CDK2	12
175	downregulated.Antt vs VC	Downregulated	Antt vs VC	BP	GO:0110149	Regulation of biomineralization	20/1101	103/18800	1.86871e-06	5.64029e-05	4.25784e-05	ROCK2/HIF1A/TGFB1/BCOR/NOTCH1/SOX9/CCN1/BMPR2/GAS6/SMAD3/FBXO5/FAM20C/SLC8A1/TGFB3/RFLNB/TENT5A/ADRB2/S1PR1/ZNF664-RFLNA/BMP4	20
176	downregulated.Antt vs VC	Downregulated	Antt vs VC	BP	GO:0043062	Extracellular structure organization	40/1101	308/18800	1.91041e-06	5.73341e-05	4.32814e-05	COL16A1/MYO1E/ZNF469/ANTXR1/HMCN1/FURIN/TGFB1/PHLDB1/NOTCH1/ADAMTS12/TGFBI/SOX9/CCN1/FSCN1/MMP24/GAS6/FLRT2/DDR1/SMAD3/COL4A5/CARMIL2/COL4A1/FOXC2/RECK/BCL3/ERCC2/CRISPLD2/COL5A3/PHLDB2/CCDC80/FOXF2/COL8A1/ADAMTS15/CAV2/CCN2/TNFRSF11B/CAV1/CREB3L1/OLFML2B/TGFB2	40
177	downregulated.Antt vs VC	Downregulated	Antt vs VC	BP	GO:0048880	Sensory system development	47/1101	389/18800	1.97389e-06	5.89045e-05	4.44669e-05	EFEMP1/PPP1R13L/VIM/EPHB2/MEIS2/CACNA1C/GDF11/RARG/HIF1A/TGIF2/NF2/TBX2/EPHA2/TCIRG1/SOX9/SRF/DLX1/GLI3/BMPR2/FZD4/NECTIN1/CRYAB/CITED2/FAT1/SMAD3/MITF/LHX1/LIMK2/SHROOM2/COL4A1/FOXC2/BCAR3/WNT7A/PITX2/WNT7B/ATP2B4/FOXF2/PDGFRB/PBX3/COL8A1/RHOJ/WNT5B/LHX2/INHBA/PRDM1/TGFB2/BMP4	47
178	downregulated.Antt vs VC	Downregulated	Antt vs VC	BP	GO:0007091	Metaphase/anaphase transition of mitotic cell cycle	15/1101	62/18800	2.05072e-06	6.05133e-05	4.56813e-05	NEK6/BUB1B/TACC3/CENPE/DLGAP5/XRCC3/CCNB1/AURKB/CENPF/UBE2C/FBXO5/ESPL1/SPDL1/ZWINT/PLK1	15
179	downregulated.Antt vs VC	Downregulated	Antt vs VC	BP	GO:0035904	Aorta development	15/1101	62/18800	2.05072e-06	6.05133e-05	4.56813e-05	NDST1/SUFU/TBX2/NOTCH1/SRF/MYLK/PLXND1/SMAD6/EFNB2/PRICKLE1/PDGFRB/NKX3-1/PRDM1/SOX4/TGFB2	15
180	downregulated.Antt vs VC	Downregulated	Antt vs VC	BP	GO:0072163	Mesonephric epithelium development	19/1101	95/18800	2.11438e-06	6.17026e-05	4.65791e-05	GDF11/SDC1/PTCH1/SOX9/FOXD1/GLI3/SMAD3/LHX1/BASP1/FOXC2/LAMA5/BMPER/SMAD6/SIX2/FGFR2/SALL1/FGF1/LGR4/BMP4	19
181	downregulated.Antt vs VC	Downregulated	Antt vs VC	BP	GO:0072164	Mesonephric tubule development	19/1101	95/18800	2.11438e-06	6.17026e-05	4.65791e-05	GDF11/SDC1/PTCH1/SOX9/FOXD1/GLI3/SMAD3/LHX1/BASP1/FOXC2/LAMA5/BMPER/SMAD6/SIX2/FGFR2/SALL1/FGF1/LGR4/BMP4	19
182	downregulated.Antt vs VC	Downregulated	Antt vs VC	BP	GO:1901888	Regulation of cell junction assembly	30/1101	201/18800	2.18475e-06	6.34058e-05	4.78649e-05	EPHB2/COL16A1/ROCK2/CORO1C/NLGN2/PEAK1/MDGA1/EPHA2/AGRN/LIMCH1/PDLIM5/FERMT2/NECTIN1/FLRT2/SMAD3/IRX3/LRFN4/SNAI2/WNT7A/VCL/ST8SIA2/PHLDB2/S100A10/ACTG1/PTPRJ/CNTNAP2/BDNF/THBS1/CAV1/OXTR	30
183	downregulated.Antt vs VC	Downregulated	Antt vs VC	BP	GO:0140694	Non-membrane-bounded organelle assembly	46/1101	379/18800	2.23573e-06	6.45306e-05	4.8714e-05	NEK6/CCNB2/KIF23/ASAP1/TUBB/KAT2B/FHOD3/GSN/RTTN/CENPE/CENPA/SPAG5/KIF4A/DLGAP5/CENPX/NEK2/AURKB/KIFC1/SRF/FSCN1/INCENP/CDC20/CENPF/ANKRD1/PLK4/TMOD2/WDR1/FBXO5/STARD9/NKX2-5/MYBL2/ASPM/ANLN/PLK1/ACTG1/PDGFRB/EZR/C10orf90/CDK2/TPM1/LDB3/PLK2/SYNPO2L/MYPN/MISP/EDN1	46
184	downregulated.Antt vs VC	Downregulated	Antt vs VC	BP	GO:0045229	External encapsulating structure organization	40/1101	310/18800	2.24943e-06	6.45734e-05	4.87463e-05	COL16A1/MYO1E/ZNF469/ANTXR1/HMCN1/FURIN/TGFB1/PHLDB1/NOTCH1/ADAMTS12/TGFBI/SOX9/CCN1/FSCN1/MMP24/GAS6/FLRT2/DDR1/SMAD3/COL4A5/CARMIL2/COL4A1/FOXC2/RECK/BCL3/ERCC2/CRISPLD2/COL5A3/PHLDB2/CCDC80/FOXF2/COL8A1/ADAMTS15/CAV2/CCN2/TNFRSF11B/CAV1/CREB3L1/OLFML2B/TGFB2	40
185	downregulated.Antt vs VC	Downregulated	Antt vs VC	BP	GO:0030099	Myeloid cell differentiation	47/1101	391/18800	2.27707e-06	6.50135e-05	4.90785e-05	NCAPG2/CDKN2B/MEIS2/CBFB/ITPKB/HMGB2/STAT5B/ANXA2/RARG/HIF1A/ACTN1/MYH9/TGFB1/H4C12/EPHA2/TCIRG1/FLI1/H4C3/FASN/SRF/H4C8/THRA/LBR/PRMT6/CDK6/H4C11/KLF10/H4C14/HMGB3/CITED2/PIK3CD/WDR1/MITF/H4C15/FAM20C/TRIM58/F2RL1/H4C2/ERCC2/CAMK4/TGFBR3/KITLG/ITGB8/INHBA/TSPAN2/LRRC17/BMP4	47
186	downregulated.Antt vs VC	Downregulated	Antt vs VC	BP	GO:0007178	Transmembrane receptor protein serine/threonine kinase signaling pathway	45/1101	368/18800	2.35048e-06	6.67485e-05	5.03883e-05	VIM/CDKN2B/PXN/GDF11/CRIM1/TGFB1I1/FURIN/RGMB/TGFB1/LTBP2/TGIF2/NOTCH1/C20orf27/FERMT2/SMURF2/ZYX/FOXD1/CCN1/DLX1/BMPR2/RUNX2/CITED2/SMAD3/BAMBI/FSTL1/ZNF703/HOXA13/BMPER/TGFB3/MSX2/SMAD9/TGFBR3/SMAD6/NREP/ID1/FST/CAV2/THBS1/ITGB8/INHBA/CAV1/ATOH8/TGFB2/DLX5/BMP4	45
187	downregulated.Antt vs VC	Downregulated	Antt vs VC	BP	GO:0045930	Negative regulation of mitotic cell cycle	33/1101	234/18800	2.49671e-06	7.05084e-05	5.32266e-05	JADE1/CLSPN/CDKN2B/TICRR/BUB1B/MAP3K20/DACT1/XRCC3/CTDSPL/MIIP/CCNB1/AURKB/RBL1/BLM/EZH2/CENPF/GTSE1/FOXN3/DTL/NABP1/FBXO5/CCND1/SPDL1/ZWINT/CDK1/WEE1/PLK1/FHL1/KANK2/CDK2/INHBA/PLK2/BMP4	33
188	downregulated.Antt vs VC	Downregulated	Antt vs VC	BP	GO:0048844	Artery morphogenesis	17/1101	79/18800	2.50957e-06	7.05084e-05	5.32266e-05	LDLR/TBX2/NOTCH1/SRF/BMPR2/MYLK/NOTCH3/CITED2/FOXC2/HOXA13/EFNB2/PDGFRB/PRDM1/SOX4/TGFB2/EDN1/BMP4	17
189	downregulated.Antt vs VC	Downregulated	Antt vs VC	BP	GO:0035148	Tube formation	25/1101	152/18800	2.57695e-06	7.20183e-05	5.43664e-05	VASP/RARG/SUFU/HIF1A/PTCH1/TGFB1/NOTCH1/SOX9/PODXL/LUZP1/CITED2/PIK3CD/EGF/IRX3/FZD2/NFIB/PRICKLE1/FGFR2/SHROOM3/TEAD2/LHX2/SOX4/ATOH8/TGFB2/BMP4	25
190	downregulated.Antt vs VC	Downregulated	Antt vs VC	BP	GO:0003158	Endothelium development	23/1101	133/18800	2.67287e-06	7.43058e-05	5.60932e-05	ROCK2/STARD13/NOTCH1/ADAMTS12/APOLD1/FASN/BMPR2/RHOB/FSTL1/FOXC2/F2RL1/HOXA13/NR2F2/VCL/ARHGEF26/EZR/ID1/SOX18/FGF1/S1PR1/ATOH8/NRG1/BMP4	23
191	downregulated.Antt vs VC	Downregulated	Antt vs VC	BP	GO:0007160	Cell-matrix adhesion	33/1101	235/18800	2.74491e-06	7.56848e-05	5.71342e-05	CD44/EPDR1/COL16A1/PXN/ROCK2/RIN2/AJUBA/CORO1C/EMP2/PEAK1/ACTN1/AJAP1/NF2/LIMCH1/ADAMTS12/PLEKHA2/FERMT2/ZYX/SRF/THSD1/ITGA7/CDK6/DDR1/SMAD3/COL5A3/VCL/SERPINE1/PHLDB2/S100A10/ACTG1/PTPRJ/THBS1/CCN2	33
192	downregulated.Antt vs VC	Downregulated	Antt vs VC	BP	GO:0006310	Dna recombination	41/1101	324/18800	2.77526e-06	7.56848e-05	5.71342e-05	NUCKS1/H1-4/NSD2/TEX11/HMGB2/RAD54L/SWAP70/MCM3/MCM2/RMI1/ATAD5/TGFB1/HDGFL2/CENPX/TIMELESS/HMGB1/XRCC3/MMS22L/EXO1/ZNF365/BLM/CLCF1/HMGB3/NABP1/KPNA2/ACTB/UNG/TOP2A/PIF1/TONSL/GINS2/ERCC2/RAD51/SHOC1/H2AX/MCM5/BRME1/CDC7/RAD54B/BRIP1/IL7R	41
193	downregulated.Antt vs VC	Downregulated	Antt vs VC	BP	GO:0014031	Mesenchymal cell development	18/1101	88/18800	2.77979e-06	7.56848e-05	5.71342e-05	ANXA6/NRP2/TCOF1/CORO1C/HIF1A/NOTCH1/SOX9/CITED2/FOXC2/SNAI2/LAMA5/PITX2/SEMA7A/KITLG/SEMA3C/NRG1/EDN1/BMP4	18
194	downregulated.Antt vs VC	Downregulated	Antt vs VC	BP	GO:0048864	Stem cell development	18/1101	88/18800	2.77979e-06	7.56848e-05	5.71342e-05	ANXA6/NRP2/TCOF1/CORO1C/HIF1A/SOX9/CITED2/FOXC2/SNAI2/LAMA5/WNT7A/PITX2/SEMA7A/KITLG/SEMA3C/NRG1/EDN1/BMP4	18
195	downregulated.Antt vs VC	Downregulated	Antt vs VC	BP	GO:0060348	Bone development	32/1101	225/18800	2.93855e-06	7.95971e-05	6.00876e-05	ANXA6/NSD2/ANXA2/RARG/FLI1/ADAMTS12/SOX9/SRF/GLI3/BMPR2/RUNX2/BNC2/FOXN3/CITED2/TRIM45/EBP/XYLT1/FAM20C/DHRS3/TGFB3/MSX2/PDGFC/PITX2/AXIN2/RFLNB/FGFR2/INSIG1/FGFR3/ZNF664-RFLNA/LRRC17/DLX5/BMP4	32
196	downregulated.Antt vs VC	Downregulated	Antt vs VC	BP	GO:0044319	Wound healing, spreading of cells	11/1101	35/18800	2.99714e-06	8.03598e-05	6.06634e-05	CD44/AJUBA/HBEGF/MRTFA/FERMT2/CCN1/DDR1/CARMIL2/WNT7A/MSX2/PHLDB2	11
197	downregulated.Antt vs VC	Downregulated	Antt vs VC	BP	GO:0090505	Epiboly involved in wound healing	11/1101	35/18800	2.99714e-06	8.03598e-05	6.06634e-05	CD44/AJUBA/HBEGF/MRTFA/FERMT2/CCN1/DDR1/CARMIL2/WNT7A/MSX2/PHLDB2	11
198	downregulated.Antt vs VC	Downregulated	Antt vs VC	BP	GO:0071559	Response to transforming growth factor beta	35/1101	258/18800	3.0831e-06	8.22471e-05	6.20881e-05	CDKN2B/PXN/ROCK2/IGF1R/TGFB1I1/FURIN/TGFB1/LTBP2/PDGFA/HYAL2/C20orf27/SOX9/FERMT2/SMURF2/ZYX/DLX1/ANKRD1/CITED2/SMAD3/BAMBI/ZNF703/WNT7A/TGFB3/SMAD9/TGFBR3/SMAD6/NREP/ID1/FGFR2/CAV2/THBS1/ITGB8/CAV1/TGFB2/EDN1	35
199	downregulated.Antt vs VC	Downregulated	Antt vs VC	BP	GO:0033045	Regulation of sister chromatid segregation	16/1101	72/18800	3.15493e-06	8.33216e-05	6.28993e-05	NEK6/BUB1B/TACC3/CENPE/DLGAP5/XRCC3/CCNB1/AURKB/CENPF/UBE2C/PTTG1/FBXO5/ESPL1/SPDL1/ZWINT/PLK1	16
200	downregulated.Antt vs VC	Downregulated	Antt vs VC	BP	GO:1905818	Regulation of chromosome separation	16/1101	72/18800	3.15493e-06	8.33216e-05	6.28993e-05	NEK6/BUB1B/TACC3/CENPE/DLGAP5/XRCC3/CCNB1/AURKB/CENPF/UBE2C/PTTG1/FBXO5/ESPL1/SPDL1/ZWINT/PLK1	16
201	downregulated.Antt vs VC	Downregulated	Antt vs VC	BP	GO:0030177	Positive regulation of wnt signaling pathway	24/1101	144/18800	3.20164e-06	8.41345e-05	6.35129e-05	DACT1/TGFB1/DEPDC1B/TBL1XR1/SMURF2/SMAD3/BAMBI/EGF/ASPM/DAAM2/DIXDC1/RECK/KANK1/LYPD6/WNT5B/FGFR2/SALL1/NKD1/CAV1/SOX4/WNT3/LGR4/DLX5/LGR5	24
202	downregulated.Antt vs VC	Downregulated	Antt vs VC	BP	GO:0045860	Positive regulation of protein kinase activity	47/1101	396/18800	3.23507e-06	8.45922e-05	6.38585e-05	RALB/CLSPN/TRAF2/CALM3/AJUBA/EMP2/CENPE/ECT2/TGFB1/PSRC1/PDGFA/CCNB1/HBEGF/FERMT2/CCN1/EZH2/MALT1/BMPR2/GAS6/FZD4/INCENP/CCDC88A/MOB3B/PDGFB/EGF/NEDD9/CDC25B/CCND1/PDGFC/CD24/ATP2B4/VEGFC/AXIN2/KITLG/PDGFRB/ADCYAP1/ADORA1/NTF3/CAMKK1/ADRB2/GPRC5A/THBS1/FGF1/NRG1/TGFB2/CARD10/EDN1	47
203	downregulated.Antt vs VC	Downregulated	Antt vs VC	BP	GO:0001942	Hair follicle development	18/1101	89/18800	3.29612e-06	8.53436e-05	6.44257e-05	NSDHL/PDGFA/NOTCH1/SOX9/GLI2/ALX4/LAMA5/ERCC2/MSX2/FGFR2/FST/LHX2/SOX18/INHBA/TNFRSF19/LGR4/TGFB2/LGR5	18
204	downregulated.Antt vs VC	Downregulated	Antt vs VC	BP	GO:0051781	Positive regulation of cell division	18/1101	89/18800	3.29612e-06	8.53436e-05	6.44257e-05	KIF23/IGF1R/ECT2/TGFB1/PDGFA/AURKB/CIT/CDC14A/PDGFB/CDC25B/TGFB3/PDGFC/VEGFC/FGF5/NKX3-1/FGFR2/FGF1/TGFB2	18
205	downregulated.Antt vs VC	Downregulated	Antt vs VC	BP	GO:0044784	Metaphase/anaphase transition of cell cycle	15/1101	65/18800	3.87338e-06	9.9801e-05	7.53395e-05	NEK6/BUB1B/TACC3/CENPE/DLGAP5/XRCC3/CCNB1/AURKB/CENPF/UBE2C/FBXO5/ESPL1/SPDL1/ZWINT/PLK1	15
206	downregulated.Antt vs VC	Downregulated	Antt vs VC	BP	GO:0001701	In utero embryonic development	46/1101	387/18800	3.9453e-06	0.000101161	7.63658e-05	NCAPG2/DBN1/MBNL1/CCNB2/CAPN2/MYO1E/ADCY9/HIF1A/NSDHL/FURIN/MYH9/PTCH1/NEK2/CCNB1/TM4SF1/BCOR/NOTCH1/SOCS3/TBL1XR1/CCN1/SRF/GLI3/PLPP4/TET1/APBA1/PLCD3/PLK4/CITED2/HS6ST1/NASP/SMAD3/PDGFB/GINS1/ERCC2/RRM2/TGFB3/NXN/WNT7B/NR2F2/TEAD4/ASF1B/E2F8/FGFR2/SOX18/PRDM1/EDN1	46
207	downregulated.Antt vs VC	Downregulated	Antt vs VC	BP	GO:0001823	Mesonephros development	19/1101	99/18800	4.02732e-06	0.000102765	7.75769e-05	GDF11/SDC1/PTCH1/SOX9/FOXD1/GLI3/SMAD3/LHX1/BASP1/FOXC2/LAMA5/BMPER/SMAD6/SIX2/FGFR2/SALL1/FGF1/LGR4/BMP4	19
208	downregulated.Antt vs VC	Downregulated	Antt vs VC	BP	GO:0090504	Epiboly	11/1101	36/18800	4.08846e-06	0.000103823	7.8376e-05	CD44/AJUBA/HBEGF/MRTFA/FERMT2/CCN1/DDR1/CARMIL2/WNT7A/MSX2/PHLDB2	11
209	downregulated.Antt vs VC	Downregulated	Antt vs VC	BP	GO:0051052	Regulation of dna metabolic process	53/1101	472/18800	4.10851e-06	0.000103833	7.83834e-05	DEK/NUCKS1/H1-4/PCNA/JADE1/LPIN1/NSD2/TICRR/CDAN1/IGF1R/ATAD5/TGFB1/HDGFL2/ESCO2/NEK2/TIMELESS/HMGB1/FOXM1/AURKB/ZNF365/BLM/BMPR2/GMNN/ANKRD1/CLCF1/CCDC88A/FBXO5/KPNA2/ACTB/DNA2/PDGFB/BAZ1A/GINS1/EGF/GLI2/PIF1/BCAR3/GINS2/ERCC2/TOX/RAD51/H2AX/JADE2/CCNA2/AXIN2/FMN2/CDK1/ID3/CDC7/PDGFRB/E2F8/CDK2/IL7R	53
210	downregulated.Antt vs VC	Downregulated	Antt vs VC	BP	GO:0044786	Cell cycle dna replication	12/1101	43/18800	4.32501e-06	0.000108784	8.21209e-05	PCNA/MCM3/MCM2/ATAD5/BLM/GMNN/FBXO5/DNA2/GINS1/RAD51/CDC7/E2F8	12
211	downregulated.Antt vs VC	Downregulated	Antt vs VC	BP	GO:0051983	Regulation of chromosome segregation	18/1101	91/18800	4.59584e-06	0.000115048	8.68498e-05	NEK6/BUB1B/TACC3/CENPE/DLGAP5/XRCC3/CCNB1/AURKB/CENPF/UBE2C/PTTG1/FBXO5/CDCA2/ESPL1/MKI67/SPDL1/ZWINT/PLK1	18
212	downregulated.Antt vs VC	Downregulated	Antt vs VC	BP	GO:0071560	Cellular response to transforming growth factor beta stimulus	34/1101	252/18800	4.79504e-06	0.000119469	9.01868e-05	CDKN2B/PXN/IGF1R/TGFB1I1/FURIN/TGFB1/LTBP2/PDGFA/HYAL2/C20orf27/SOX9/FERMT2/SMURF2/ZYX/DLX1/ANKRD1/CITED2/SMAD3/BAMBI/ZNF703/WNT7A/TGFB3/SMAD9/TGFBR3/SMAD6/NREP/ID1/FGFR2/CAV2/THBS1/ITGB8/CAV1/TGFB2/EDN1	34
213	downregulated.Antt vs VC	Downregulated	Antt vs VC	BP	GO:0060284	Regulation of cell development	55/1101	500/18800	5.04131e-06	0.000124863	9.42589e-05	PLXNA1/DBN1/EPHB2/CDKN2B/LDLR/ROCK2/CORO1C/HMGB2/HIF1A/TGFB1/NF2/BAIAP2/NIN/ZNF365/NOTCH1/FERMT2/NUMBL/SRF/EZH2/DLX1/GLI3/BMPR2/SHANK3/CLCF1/NEFL/PLXND1/HES6/ACTN4/ASPM/TRIM58/DAAM2/NEDD9/PLXNA4/DIXDC1/RECK/WNT7A/VEGFC/VCL/AXIN2/SEMA7A/RFLNB/S100A10/KANK1/BDNF/ID1/E2F1/SEMA3C/TIAM2/LHX2/ZNF664-RFLNA/WNT3/GBP1/LIN28A/ZNF488/BMP4	55
214	downregulated.Antt vs VC	Downregulated	Antt vs VC	BP	GO:0007266	Rho protein signal transduction	23/1101	138/18800	5.10059e-06	0.000124863	9.42589e-05	HACD3/LPAR1/ROCK2/STARD13/EPS8/CTNNAL1/ARHGAP29/RIPOR1/ARHGAP42/EPS8L2/CDC42EP3/RHOB/F2RL1/STMN1/STARD8/F2R/KANK1/PDGFRB/RHOJ/KANK2/SYNPO2L/LPAR4/RIPOR2	23
215	downregulated.Antt vs VC	Downregulated	Antt vs VC	BP	GO:0014032	Neural crest cell development	17/1101	83/18800	5.12597e-06	0.000124863	9.42589e-05	ANXA6/NRP2/TCOF1/CORO1C/HIF1A/SOX9/CITED2/FOXC2/SNAI2/LAMA5/PITX2/SEMA7A/KITLG/SEMA3C/NRG1/EDN1/BMP4	17
216	downregulated.Antt vs VC	Downregulated	Antt vs VC	BP	GO:0050000	Chromosome localization	17/1101	83/18800	5.12597e-06	0.000124863	9.42589e-05	ACTR3/KIF18A/CENPE/SPAG5/NUF2/PSRC1/DLGAP5/CDCA8/CCNB1/AURKB/KIFC1/INCENP/CENPF/LMNA/SPDL1/FMN2/FAM83D	17
217	downregulated.Antt vs VC	Downregulated	Antt vs VC	BP	GO:0030326	Embryonic limb morphogenesis	21/1101	119/18800	5.16589e-06	0.000124863	9.42589e-05	MBNL1/MAP3K20/CACNA1C/RARG/PTCH1/TBX2/NOTCH1/GLI3/RUNX2/PITX1/RECK/HOXA13/ALX4/WNT7A/MSX2/DLX6/SALL1/WNT3/TGFB2/DLX5/BMP4	21
218	downregulated.Antt vs VC	Downregulated	Antt vs VC	BP	GO:0035113	Embryonic appendage morphogenesis	21/1101	119/18800	5.16589e-06	0.000124863	9.42589e-05	MBNL1/MAP3K20/CACNA1C/RARG/PTCH1/TBX2/NOTCH1/GLI3/RUNX2/PITX1/RECK/HOXA13/ALX4/WNT7A/MSX2/DLX6/SALL1/WNT3/TGFB2/DLX5/BMP4	21
219	downregulated.Antt vs VC	Downregulated	Antt vs VC	BP	GO:0045137	Development of primary sexual characteristics	32/1101	231/18800	5.17702e-06	0.000124863	9.42589e-05	SDC1/TEX11/HMGB2/STAT5B/FANCG/KIF18A/PDGFA/FANCA/SOX9/TFAP2C/RHOBTB3/FZD4/CITED2/NASP/BASP1/BOK/ASPM/MAMLD1/CCND1/NR2F2/GFRA1/ARID5B/KITLG/PDGFRB/NKX3-1/FST/BRIP1/SALL1/CBX2/INHBA/TGFB2/LFNG	32
220	downregulated.Antt vs VC	Downregulated	Antt vs VC	BP	GO:0045668	Negative regulation of osteoblast differentiation	13/1101	51/18800	5.25245e-06	0.000125536	9.47668e-05	CRIM1/SUFU/PTCH1/NOTCH1/SOX9/CDK6/SMAD3/BAMBI/RIOX1/VEGFC/AXIN2/SMAD6/ID3	13
221	downregulated.Antt vs VC	Downregulated	Antt vs VC	BP	GO:0051496	Positive regulation of stress fiber assembly	13/1101	51/18800	5.25245e-06	0.000125536	9.47668e-05	LPAR1/PXN/ROCK2/NF2/LIMCH1/FERMT2/CCDC88A/SMAD3/TGFB3/S100A10/TPM1/CCN2/SYNPO2L	13
222	downregulated.Antt vs VC	Downregulated	Antt vs VC	BP	GO:0022404	Molting cycle process	18/1101	92/18800	5.40499e-06	0.000128023	9.66443e-05	NSDHL/PDGFA/NOTCH1/SOX9/GLI2/ALX4/LAMA5/ERCC2/MSX2/FGFR2/FST/LHX2/SOX18/INHBA/TNFRSF19/LGR4/TGFB2/LGR5	18
223	downregulated.Antt vs VC	Downregulated	Antt vs VC	BP	GO:0022405	Hair cycle process	18/1101	92/18800	5.40499e-06	0.000128023	9.66443e-05	NSDHL/PDGFA/NOTCH1/SOX9/GLI2/ALX4/LAMA5/ERCC2/MSX2/FGFR2/FST/LHX2/SOX18/INHBA/TNFRSF19/LGR4/TGFB2/LGR5	18
224	downregulated.Antt vs VC	Downregulated	Antt vs VC	BP	GO:0008608	Attachment of spindle microtubules to kinetochore	11/1101	37/18800	5.51175e-06	0.000129969	9.81133e-05	KNSTRN/CENPE/ECT2/SPAG5/KNL1/NUF2/NEK2/CCNB1/AURKB/SPC24/SPC25	11
225	downregulated.Antt vs VC	Downregulated	Antt vs VC	BP	GO:2000027	Regulation of animal organ morphogenesis	22/1101	129/18800	5.53848e-06	0.000130019	9.8151e-05	DACT1/AJAP1/PDGFA/FZD7/SOX9/SMURF2/RUNX2/CITED2/LHX1/VANGL1/FZD2/SNAI2/WNT7A/PRICKLE1/PRICKLE2/SIX2/FGF1/NKD1/TNFRSF11B/LGR4/EDN1/BMP4	22
226	downregulated.Antt vs VC	Downregulated	Antt vs VC	BP	GO:0036293	Response to decreased oxygen levels	38/1101	299/18800	5.74344e-06	0.000134234	0.000101333	KCNMA1/CAPN2/ROCK2/AJUBA/HIF1A/PDLIM1/PDGFA/NOTCH1/ATP1B1/SRF/DDAH1/KCNMB1/CRYAB/EGLN3/CITED2/SMAD3/LMNA/WTIP/ACTN4/SLC29A1/SLC8A1/TGFB3/PLAT/CD24/VEGFC/CCNA2/FMN2/TGFBR3/NKX3-1/ADORA1/E2F1/BRIP1/THBS1/CCN2/CAV1/TGFB2/OXTR/EDN1	38
227	downregulated.Antt vs VC	Downregulated	Antt vs VC	BP	GO:0098773	Skin epidermis development	18/1101	93/18800	6.34008e-06	0.000146927	0.000110915	NSDHL/PDGFA/NOTCH1/SOX9/GLI2/ALX4/LAMA5/ERCC2/MSX2/FGFR2/FST/LHX2/SOX18/INHBA/TNFRSF19/LGR4/TGFB2/LGR5	18
228	downregulated.Antt vs VC	Downregulated	Antt vs VC	BP	GO:0050678	Regulation of epithelial cell proliferation	45/1101	382/18800	6.34219e-06	0.000146927	0.000110915	NRP2/CDKN2B/HMGB2/HIF1A/PTCH1/IQGAP3/TGFB1/HMGB1/FZD7/NOTCH1/JCAD/SOX9/BMPR2/CDK6/PIK3CD/SMAD3/PDGFB/EGF/SNAI2/ZNF703/CCND1/WNT7A/APLN/NR2F2/GLUL/VEGFC/NFIB/TGFBR3/EFNB2/SFN/NKX3-1/ID1/DLX6/FGFR2/CAV2/THBS1/FGF1/CAV1/UHRF1/FGFBP1/ATOH8/TGFB2/DLX5/F3/BMP4	45
229	downregulated.Antt vs VC	Downregulated	Antt vs VC	BP	GO:0000075	Cell cycle checkpoint signaling	26/1101	170/18800	6.50246e-06	0.000149501	0.000112858	CLSPN/TICRR/BUB1B/MAP3K20/TIMELESS/XRCC3/CCNB1/AURKB/BLM/CENPF/GTSE1/FOXN3/DTL/NABP1/DNA2/CCND1/H2AX/SPDL1/ZWINT/CDK1/PLK1/WDR76/CDK2/E2F1/BRIP1/PLK2	26
230	downregulated.Antt vs VC	Downregulated	Antt vs VC	BP	GO:1902751	Positive regulation of cell cycle g2/m phase transition	10/1101	31/18800	6.51794e-06	0.000149501	0.000112858	ATAD5/CCNB1/CDC25C/DTL/FBXO5/CDC25A/CDC25B/CCND1/CDK1/CDC7	10
231	downregulated.Antt vs VC	Downregulated	Antt vs VC	BP	GO:0008584	Male gonad development	23/1101	140/18800	6.53817e-06	0.000149501	0.000112858	SDC1/TEX11/HMGB2/KIF18A/PDGFA/FANCA/SOX9/TFAP2C/RHOBTB3/CITED2/NASP/BOK/ASPM/MAMLD1/CCND1/GFRA1/ARID5B/KITLG/PDGFRB/NKX3-1/BRIP1/INHBA/TGFB2	23
232	downregulated.Antt vs VC	Downregulated	Antt vs VC	BP	GO:0070482	Response to oxygen levels	40/1101	324/18800	6.70258e-06	0.000152599	0.000115197	KCNMA1/CAPN2/ROCK2/AJUBA/HIF1A/PDLIM1/PDGFA/FAS/NOTCH1/ATP1B1/SRF/DDAH1/KCNMB1/CRYAB/EGLN3/CITED2/SMAD3/LMNA/WTIP/ACTN4/SLC29A1/SLC8A1/TGFB3/PLAT/CD24/VEGFC/CCNA2/FMN2/TGFBR3/PDGFRB/NKX3-1/ADORA1/E2F1/BRIP1/THBS1/CCN2/CAV1/TGFB2/OXTR/EDN1	40
233	downregulated.Antt vs VC	Downregulated	Antt vs VC	BP	GO:0003093	Regulation of glomerular filtration	6/1101	10/18800	6.81655e-06	0.000153942	0.00011621	EMP2/GAS6/PDGFB/F2RL1/F2R/ADORA1	6
234	downregulated.Antt vs VC	Downregulated	Antt vs VC	BP	GO:0032967	Positive regulation of collagen biosynthetic process	9/1101	25/18800	6.81985e-06	0.000153942	0.00011621	VIM/TGFB1/SERPINB7/TGFB3/F2R/PDGFRB/CCN2/CREB3L1/BMP4	9
235	downregulated.Antt vs VC	Downregulated	Antt vs VC	BP	GO:0030071	Regulation of mitotic metaphase/anaphase transition	14/1101	60/18800	7.06162e-06	0.000158721	0.000119818	NEK6/BUB1B/CENPE/DLGAP5/XRCC3/CCNB1/AURKB/CENPF/UBE2C/FBXO5/ESPL1/SPDL1/ZWINT/PLK1	14
236	downregulated.Antt vs VC	Downregulated	Antt vs VC	BP	GO:0006939	Smooth muscle contraction	20/1101	112/18800	7.15315e-06	0.000160097	0.000120857	KCNMA1/ROCK2/TBX2/SRF/MYLK/PLCE1/ARHGAP42/SSTR2/SMTN/TBXA2R/SLC8A1/ATP2B4/F2R/ADORA1/ADRB2/ACTA2/CAV1/CNN1/OXTR/EDN1	20
237	downregulated.Antt vs VC	Downregulated	Antt vs VC	BP	GO:0046546	Development of primary male sexual characteristics	23/1101	141/18800	7.38698e-06	0.000164633	0.000124281	SDC1/TEX11/HMGB2/KIF18A/PDGFA/FANCA/SOX9/TFAP2C/RHOBTB3/CITED2/NASP/BOK/ASPM/MAMLD1/CCND1/GFRA1/ARID5B/KITLG/PDGFRB/NKX3-1/BRIP1/INHBA/TGFB2	23
238	downregulated.Antt vs VC	Downregulated	Antt vs VC	BP	GO:0010718	Positive regulation of epithelial to mesenchymal transition	13/1101	53/18800	8.31846e-06	0.000184614	0.000139365	TGFB1I1/TGFB1/NOTCH1/FERMT2/EZH2/SMAD3/BAMBI/ZNF703/TGFB3/AXIN2/GLIPR2/TGFB2/BMP4	13
239	downregulated.Antt vs VC	Downregulated	Antt vs VC	BP	GO:0032535	Regulation of cellular component size	42/1101	351/18800	8.70999e-06	0.000192494	0.000145313	KCNMA1/DBN1/KIRREL1/VASP/FHOD3/SWAP70/GSN/RARG/RIN3/SLC12A9/IQGAP3/SPTAN1/EPS8/ADD2/BAIAP2/SRF/BMPR2/SHANK3/TMOD2/ARHGAP28/NEFL/CIT/WDR1/CARMIL2/KCNN4/CDC42EP3/DAAM2/F2RL1/PLXNA4/RAB3B/WNT7A/WNT7B/PLEKHG2/SEMA7A/KANK1/EZR/BDNF/LIMA1/SEMA3C/WNT3/IL7R/EDN1	42
240	downregulated.Antt vs VC	Downregulated	Antt vs VC	BP	GO:0001952	Regulation of cell-matrix adhesion	21/1101	123/18800	8.82667e-06	0.000193372	0.000145976	COL16A1/ROCK2/RIN2/CORO1C/EMP2/PEAK1/AJAP1/NF2/LIMCH1/PLEKHA2/FERMT2/CDK6/DDR1/SMAD3/VCL/SERPINE1/PHLDB2/S100A10/ACTG1/PTPRJ/THBS1	21
241	downregulated.Antt vs VC	Downregulated	Antt vs VC	BP	GO:0032355	Response to estradiol	21/1101	123/18800	8.82667e-06	0.000193372	0.000145976	PCNA/IGF1R/STAT5B/KIF18A/PTCH1/TGFB1/PDGFA/EZH2/SOCS2/CRYAB/SSTR2/ZNF703/CCND1/WNT7A/PTGFR/MSX2/NR2F2/CCNA2/PDGFRB/CCN2/OXTR	21
242	downregulated.Antt vs VC	Downregulated	Antt vs VC	BP	GO:0008406	Gonad development	31/1101	226/18800	8.85954e-06	0.000193372	0.000145976	SDC1/TEX11/HMGB2/STAT5B/FANCG/KIF18A/PDGFA/FANCA/SOX9/TFAP2C/RHOBTB3/FZD4/CITED2/NASP/BASP1/BOK/ASPM/MAMLD1/CCND1/NR2F2/GFRA1/ARID5B/KITLG/PDGFRB/NKX3-1/FST/BRIP1/SALL1/INHBA/TGFB2/LFNG	31
243	downregulated.Antt vs VC	Downregulated	Antt vs VC	BP	GO:0071772	Response to bmp	26/1101	173/18800	8.98222e-06	0.000194443	0.000146785	CRIM1/RGMB/TGFB1/NOTCH1/ADAMTS12/SOX9/SMURF2/FOXD1/CCN1/DLX1/BMPR2/RUNX2/SMAD3/BAMBI/FSTL1/HOXA13/BMPER/TGFB3/MSX2/SMAD9/TGFBR3/SMAD6/FST/TGFB2/DLX5/BMP4	26
244	downregulated.Antt vs VC	Downregulated	Antt vs VC	BP	GO:0071773	Cellular response to bmp stimulus	26/1101	173/18800	8.98222e-06	0.000194443	0.000146785	CRIM1/RGMB/TGFB1/NOTCH1/ADAMTS12/SOX9/SMURF2/FOXD1/CCN1/DLX1/BMPR2/RUNX2/SMAD3/BAMBI/FSTL1/HOXA13/BMPER/TGFB3/MSX2/SMAD9/TGFBR3/SMAD6/FST/TGFB2/DLX5/BMP4	26
245	downregulated.Antt vs VC	Downregulated	Antt vs VC	BP	GO:0018212	Peptidyl-tyrosine modification	44/1101	376/18800	9.49134e-06	0.000204626	0.000154471	EFEMP1/NCAPG2/CD44/TYRO3/AXL/EPHB2/IGF1R/MELK/PEAK1/TGFB1/PDGFA/NF2/TPST2/HBEGF/EPHA2/HYAL2/SOCS3/CSPG4/RAP2B/GAS6/CLCF1/DDR1/PBK/PDGFB/EGF/DYRK2/NEDD9/EPHB6/PDGFC/CD24/GFRA1/IL24/ROS1/WEE1/KITLG/PDGFRB/PTPRJ/ADORA1/NTF3/FGFR2/GPRC5A/FGFR3/CAV1/NRG1	44
246	downregulated.Antt vs VC	Downregulated	Antt vs VC	BP	GO:0010714	Positive regulation of collagen metabolic process	9/1101	26/18800	9.88959e-06	0.000212345	0.000160299	VIM/TGFB1/SERPINB7/TGFB3/F2R/PDGFRB/CCN2/CREB3L1/BMP4	9
247	downregulated.Antt vs VC	Downregulated	Antt vs VC	BP	GO:0000910	Cytokinesis	26/1101	174/18800	9.98316e-06	0.000213486	0.00016116	ACTR3/KIF23/ROCK2/CALM3/IGF1R/CENPA/ECT2/KIF4A/MYH9/AURKB/INCENP/KIF20A/PLK4/CIT/CDC14A/CKAP2/ESPL1/RHOB/CDC25B/STMN1/ANLN/KLHDC8B/FMN2/PLK1/E2F8/PLK2	26
248	downregulated.Antt vs VC	Downregulated	Antt vs VC	BP	GO:0032392	Dna geometric change	18/1101	96/18800	1.00806e-05	0.0002147	0.000162076	HMGB2/RAD54L/MCM3/MCM2/HMGB1/BLM/HMGB3/ERCC6L/DNA2/GINS1/TOP2A/PIF1/GINS2/ERCC2/RAD51/MCM5/RAD54B/BRIP1	18
249	downregulated.Antt vs VC	Downregulated	Antt vs VC	BP	GO:0010638	Positive regulation of organelle organization	53/1101	487/18800	1.01329e-05	0.000214949	0.000162264	RALB/ATF7IP/SMC4/LPAR1/ASAP1/PXN/ROCK2/KIRREL1/VASP/SDC1/SWAP70/ANXA2/GSN/HIF1A/NCAPH/SPAG5/PSRC1/DLGAP5/NEK2/NF2/AURKB/BAIAP2/NIN/MCU/LIMCH1/FERMT2/FSCN1/PLK4/CCDC88A/WDR1/SMAD3/NAV3/BOK/PDGFB/EGF/CARMIL2/ESPL1/CDC42EP3/F2RL1/HOXA13/TGFB3/MSX2/S100A10/SYNPO/PDGFRB/NTF3/ID1/CDK2/ADRB2/TPM1/CCN2/SYNPO2L/EDN1	53
250	downregulated.Antt vs VC	Downregulated	Antt vs VC	BP	GO:0021915	Neural tube development	24/1101	154/18800	1.05213e-05	0.000222294	0.000167809	VASP/DACT1/RARG/SUFU/HIF1A/PTCH1/TGFB1/EPHA2/NOTCH1/DZIP1L/GPR161/LUZP1/GLI3/CITED2/GLI2/FZD2/PRICKLE1/SEMA3C/SHROOM3/TEAD2/LHX2/SOX4/TGFB2/BMP4	24
251	downregulated.Antt vs VC	Downregulated	Antt vs VC	BP	GO:0048705	Skeletal system morphogenesis	31/1101	228/18800	1.06082e-05	0.000223237	0.000168521	ANXA6/NDST1/RARG/HYAL2/SOX9/GLI3/BMPR2/THRA/RUNX2/FOXN3/CITED2/SMAD3/LHX1/FOXC2/DHRS3/ALX4/WNT7A/TGFB3/MSX2/AXIN2/ARID5B/RFLNB/SIX2/FGFR2/INSIG1/CCN2/FGFR3/ZNF664-RFLNA/DLX5/HHIP/BMP4	31
252	downregulated.Antt vs VC	Downregulated	Antt vs VC	BP	GO:0000281	Mitotic cytokinesis	15/1101	71/18800	1.22778e-05	0.000257347	0.000194271	KIF23/ROCK2/CENPA/ECT2/KIF4A/INCENP/KIF20A/CIT/CKAP2/ESPL1/RHOB/STMN1/ANLN/KLHDC8B/PLK1	15
253	downregulated.Antt vs VC	Downregulated	Antt vs VC	BP	GO:0010639	Negative regulation of organelle organization	42/1101	356/18800	1.2335e-05	0.000257524	0.000194404	BUB1B/KAT2B/FHOD3/SWAP70/GSN/MCM2/ARPIN/SPTAN1/EPS8/MID1/XRCC3/CCNB1/ADD2/AURKB/FKBP4/SHANK3/CENPF/TMOD2/PTTG1/ARHGAP28/NAV3/FBXO5/FEZ2/LMNA/BOK/LIMK2/CKAP2/CARMIL2/ESPL1/TOP2A/PIF1/STMN1/CGNL1/SPDL1/ZWINT/PHLDB2/PLK1/KANK1/CCNF/LIMA1/S1PR1/BMP4	42
254	downregulated.Antt vs VC	Downregulated	Antt vs VC	BP	GO:0001666	Response to hypoxia	36/1101	286/18800	1.24367e-05	0.000258625	0.000195235	KCNMA1/CAPN2/ROCK2/AJUBA/HIF1A/PDLIM1/PDGFA/NOTCH1/ATP1B1/SRF/DDAH1/KCNMB1/CRYAB/EGLN3/CITED2/SMAD3/LMNA/WTIP/ACTN4/SLC29A1/SLC8A1/TGFB3/PLAT/CD24/VEGFC/CCNA2/FMN2/TGFBR3/NKX3-1/ADORA1/E2F1/BRIP1/THBS1/CAV1/TGFB2/EDN1	36
255	downregulated.Antt vs VC	Downregulated	Antt vs VC	BP	GO:0035329	Hippo signaling	11/1101	40/18800	1.2672e-05	0.000262483	0.000198148	TEAD1/AJUBA/NF2/CIT/MOB3B/AMOTL2/WTIP/SCHIP1/TEAD4/WWC1/TEAD2	11
256	downregulated.Antt vs VC	Downregulated	Antt vs VC	BP	GO:1903034	Regulation of response to wounding	25/1101	166/18800	1.27934e-05	0.000263963	0.000199265	EPHB2/IGF1R/AJAP1/PDGFA/HBEGF/FERMT2/MYLK/SMAD3/PDGFB/FOXC2/F2RL1/TBXA2R/ST3GAL4/PLAT/SERPINE1/PHLDB2/F2R/ACTG1/KANK1/PLPP3/THBS1/ACTA2/CAV1/F3/EDN1	25
257	downregulated.Antt vs VC	Downregulated	Antt vs VC	BP	GO:1902099	Regulation of metaphase/anaphase transition of cell cycle	14/1101	63/18800	1.29112e-05	0.000265357	0.000200318	NEK6/BUB1B/CENPE/DLGAP5/XRCC3/CCNB1/AURKB/CENPF/UBE2C/FBXO5/ESPL1/SPDL1/ZWINT/PLK1	14
258	downregulated.Antt vs VC	Downregulated	Antt vs VC	BP	GO:0072175	Epithelial tube formation	22/1101	136/18800	1.32812e-05	0.000271904	0.00020526	VASP/RARG/SUFU/HIF1A/PTCH1/TGFB1/SOX9/PODXL/LUZP1/CITED2/PIK3CD/EGF/IRX3/FZD2/PRICKLE1/FGFR2/SHROOM3/TEAD2/LHX2/SOX4/TGFB2/BMP4	22
259	downregulated.Antt vs VC	Downregulated	Antt vs VC	BP	GO:0150115	Cell-substrate junction organization	18/1101	98/18800	1.35696e-05	0.000276736	0.000208907	COL16A1/IQSEC1/ROCK2/AJUBA/CORO1C/PEAK1/ACTN1/DST/LIMCH1/FERMT2/THSD1/SMAD3/VCL/PHLDB2/S100A10/ACTG1/PTPRJ/THBS1	18
260	downregulated.Antt vs VC	Downregulated	Antt vs VC	BP	GO:0010761	Fibroblast migration	12/1101	48/18800	1.4968e-05	0.00030176	0.000227798	TNS1/CORO1C/PRR5L/TGFB1/PDLIM1/HYAL2/AKAP12/SLC8A1/ARID5B/THBS1/ACTA2/MACIR	12
261	downregulated.Antt vs VC	Downregulated	Antt vs VC	BP	GO:0035850	Epithelial cell differentiation involved in kidney development	12/1101	48/18800	1.4968e-05	0.00030176	0.000227798	MYO1E/NOTCH1/PODXL/LHX1/BASP1/PDGFB/FOXC2/CD24/SIX2/SALL1/ACTA2/BMP4	12
262	downregulated.Antt vs VC	Downregulated	Antt vs VC	BP	GO:0060976	Coronary vasculature development	12/1101	48/18800	1.4968e-05	0.00030176	0.000227798	NDST1/SUFU/NOTCH1/SRF/PLXND1/APLN/TGFBR3/SMAD6/PRICKLE1/PDGFRB/PRDM1/BMP4	12
263	downregulated.Antt vs VC	Downregulated	Antt vs VC	BP	GO:0030500	Regulation of bone mineralization	16/1101	81/18800	1.56612e-05	0.000313343	0.000236542	HIF1A/TGFB1/BCOR/SOX9/CCN1/BMPR2/SMAD3/FAM20C/SLC8A1/TGFB3/RFLNB/TENT5A/ADRB2/S1PR1/ZNF664-RFLNA/BMP4	16
264	downregulated.Antt vs VC	Downregulated	Antt vs VC	BP	GO:0051303	Establishment of chromosome localization	16/1101	81/18800	1.56612e-05	0.000313343	0.000236542	ACTR3/KIF18A/CENPE/SPAG5/NUF2/PSRC1/DLGAP5/CDCA8/CCNB1/AURKB/KIFC1/INCENP/CENPF/SPDL1/FMN2/FAM83D	16
265	downregulated.Antt vs VC	Downregulated	Antt vs VC	BP	GO:0044843	Cell cycle g1/s phase transition	33/1101	255/18800	1.59355e-05	0.000317628	0.000239776	JADE1/CDKN2B/MN1/DACT1/IQGAP3/CTDSPL/TBX2/RBL1/CDKN3/EZH2/POLE/CDK6/GTSE1/CDKN2C/NASP/SKP2/CDC25A/CCND1/RRM2/ATP2B4/CCNA2/KLF11/WEE1/CDC7/FHL1/NKX3-1/FAM83D/KANK2/CDK2/E2F1/INHBA/CCNE2/PLK2	33
266	downregulated.Antt vs VC	Downregulated	Antt vs VC	BP	GO:0072109	Glomerular mesangium development	7/1101	16/18800	1.66099e-05	0.000328589	0.000248051	NOTCH1/PDGFB/SERPINB7/FOXC2/PDGFRB/ACTA2/BMP4	7
267	downregulated.Antt vs VC	Downregulated	Antt vs VC	BP	GO:1901201	Regulation of extracellular matrix assembly	7/1101	16/18800	1.66099e-05	0.000328589	0.000248051	ANTXR1/TGFB1/PHLDB1/NOTCH1/SOX9/SMAD3/PHLDB2	7
268	downregulated.Antt vs VC	Downregulated	Antt vs VC	BP	GO:0006936	Muscle contraction	41/1101	349/18800	1.72558e-05	0.00033913	0.000256009	KCNMA1/PPP1R13L/ANXA6/TPM4/ROCK2/CALM3/CACNA1C/STAC/GAMT/GSN/TBX2/DMD/HCN4/ATP1B1/SRF/MYH2/MYLK/PLCE1/GJC1/CRYAB/TMOD2/ARHGAP42/SSTR2/NKX2-5/SMTN/TBXA2R/SLC8A1/ATP2B4/F2R/TPM2/DES/ADORA1/ADRB2/CALD1/TPM1/ACTA2/CCN2/CAV1/CNN1/OXTR/EDN1	41
269	downregulated.Antt vs VC	Downregulated	Antt vs VC	BP	GO:0018108	Peptidyl-tyrosine phosphorylation	43/1101	373/18800	1.72828e-05	0.00033913	0.000256009	EFEMP1/NCAPG2/CD44/TYRO3/AXL/EPHB2/IGF1R/MELK/PEAK1/TGFB1/PDGFA/NF2/HBEGF/EPHA2/HYAL2/SOCS3/CSPG4/RAP2B/GAS6/CLCF1/DDR1/PBK/PDGFB/EGF/DYRK2/NEDD9/EPHB6/PDGFC/CD24/GFRA1/IL24/ROS1/WEE1/KITLG/PDGFRB/PTPRJ/ADORA1/NTF3/FGFR2/GPRC5A/FGFR3/CAV1/NRG1	43
270	downregulated.Antt vs VC	Downregulated	Antt vs VC	BP	GO:1901654	Response to ketone	27/1101	190/18800	1.73353e-05	0.00033913	0.000256009	PCNA/ROCK2/CALM3/IGF1R/TGFB1/ADCY3/GAS6/SGK1/NEFL/NASP/GNAI1/GNG2/TBXA2R/HOXA13/CCND1/PTGFR/TGFB3/PLAT/TYMS/TGFBR3/NKX3-1/TRERF1/THBS1/CAV1/TGFB2/OXTR/EDN1	27
271	downregulated.Antt vs VC	Downregulated	Antt vs VC	BP	GO:0061640	Cytoskeleton-dependent cytokinesis	18/1101	100/18800	1.8102e-05	0.000352822	0.000266344	ACTR3/KIF23/ROCK2/CENPA/ECT2/KIF4A/AURKB/INCENP/KIF20A/CIT/CKAP2/ESPL1/RHOB/STMN1/ANLN/KLHDC8B/FMN2/PLK1	18
272	downregulated.Antt vs VC	Downregulated	Antt vs VC	BP	GO:0016126	Sterol biosynthetic process	14/1101	65/18800	1.88761e-05	0.000365215	0.0002757	HMGCR/NSDHL/ERG28/LBR/DHCR24/LSS/ACLY/CYP51A1/EBP/FDFT1/INSIG1/MSMO1/HMGCS1/FGF1	14
273	downregulated.Antt vs VC	Downregulated	Antt vs VC	BP	GO:1905330	Regulation of morphogenesis of an epithelium	14/1101	65/18800	1.88761e-05	0.000365215	0.0002757	PDGFA/TBX2/ADAMTS12/SOX9/PIK3CD/LHX1/EGF/SNAI2/SIX2/WNT5B/FGF1/NKD1/LGR4/BMP4	14
274	downregulated.Antt vs VC	Downregulated	Antt vs VC	BP	GO:0010971	Positive regulation of g2/m transition of mitotic cell cycle	9/1101	28/18800	1.96551e-05	0.000378899	0.00028603	CCNB1/CDC25C/DTL/FBXO5/CDC25A/CDC25B/CCND1/CDK1/CDC7	9
275	downregulated.Antt vs VC	Downregulated	Antt vs VC	BP	GO:0003012	Muscle system process	49/1101	449/18800	2.01834e-05	0.000387669	0.00029265	KCNMA1/PPP1R13L/ANXA6/TPM4/ROCK2/CALM3/CACNA1C/STAC/GAMT/GSN/LMCD1/TBX2/DMD/PDLIM5/HCN4/NOTCH1/ATP1B1/SRF/MYH2/EZH2/MYLK/PLCE1/GJC1/CRYAB/TMOD2/ARHGAP42/SSTR2/SMAD3/LMNA/NKX2-5/SMTN/TBXA2R/SORBS2/SLC8A1/ATP2B4/F2R/TPM2/DES/ADORA1/ADRB2/CALD1/TPM1/ACTA2/CCN2/RGS4/CAV1/CNN1/OXTR/EDN1	49
276	downregulated.Antt vs VC	Downregulated	Antt vs VC	BP	GO:0016331	Morphogenesis of embryonic epithelium	23/1101	150/18800	2.0891e-05	0.000399805	0.000301812	VASP/TGFB1I1/RARG/SUFU/HIF1A/PTCH1/TGFB1/SOX9/LUZP1/CITED2/IRX3/FZD2/LAMA5/WNT7B/VEGFC/PRICKLE1/FGFR2/SHROOM3/TEAD2/LHX2/SOX4/TGFB2/BMP4	23
277	downregulated.Antt vs VC	Downregulated	Antt vs VC	BP	GO:0060412	Ventricular septum morphogenesis	11/1101	42/18800	2.10616e-05	0.000401615	0.000303178	NSD2/NOTCH1/BMPR2/CITED2/NKX2-5/FZD2/TGFBR3/FGFR2/SOX4/TGFB2/BMP4	11
278	downregulated.Antt vs VC	Downregulated	Antt vs VC	BP	GO:0048565	Digestive tract development	21/1101	130/18800	2.11741e-05	0.000402308	0.000303701	DACT1/HIF1A/TBX2/NOTCH1/GLI3/SMAD3/GLI2/HOXA13/ALX4/TGFB3/TYMS/PDGFC/FOXF2/SIX2/FGFR2/SALL1/PRDM1/LGR4/TGFB2/OXTR/BMP4	21
279	downregulated.Antt vs VC	Downregulated	Antt vs VC	BP	GO:0007044	Cell-substrate junction assembly	17/1101	92/18800	2.15432e-05	0.000407214	0.000307405	COL16A1/ROCK2/AJUBA/CORO1C/PEAK1/ACTN1/DST/LIMCH1/FERMT2/THSD1/SMAD3/VCL/PHLDB2/S100A10/ACTG1/PTPRJ/THBS1	17
280	downregulated.Antt vs VC	Downregulated	Antt vs VC	BP	GO:0048041	Focal adhesion assembly	16/1101	83/18800	2.15865e-05	0.000407214	0.000307405	COL16A1/ROCK2/AJUBA/CORO1C/PEAK1/ACTN1/LIMCH1/FERMT2/THSD1/SMAD3/VCL/PHLDB2/S100A10/ACTG1/PTPRJ/THBS1	16
281	downregulated.Antt vs VC	Downregulated	Antt vs VC	BP	GO:0072009	Nephron epithelium development	19/1101	111/18800	2.24564e-05	0.000422116	0.000318654	MYO1E/PTCH1/NOTCH1/SOX9/PODXL/FOXD1/GLI3/LHX1/BASP1/IRX3/FOXC2/LAMA5/WNT7B/CD24/SIX2/SALL1/FGF1/LGR4/BMP4	19
282	downregulated.Antt vs VC	Downregulated	Antt vs VC	BP	GO:1902850	Microtubule cytoskeleton organization involved in mitosis	23/1101	151/18800	2.33041e-05	0.000436498	0.000329511	NEK6/KIF23/TACC3/CENPE/CENPA/KIF4A/NUF2/PSRC1/DLGAP5/NEK2/CCNB1/AURKB/KIFC1/CDC20/MYBL2/GNAI1/ESPL1/STMN1/SPDL1/SPC25/PLK1/PLK2/MISP	23
283	downregulated.Antt vs VC	Downregulated	Antt vs VC	BP	GO:0002011	Morphogenesis of an epithelial sheet	13/1101	58/18800	2.37457e-05	0.000438547	0.000331058	CD44/AJUBA/HBEGF/MRTFA/NOTCH1/FERMT2/CCN1/SRF/DDR1/CARMIL2/WNT7A/MSX2/PHLDB2	13
284	downregulated.Antt vs VC	Downregulated	Antt vs VC	BP	GO:0006695	Cholesterol biosynthetic process	13/1101	58/18800	2.37457e-05	0.000438547	0.000331058	HMGCR/NSDHL/LBR/DHCR24/LSS/ACLY/CYP51A1/EBP/FDFT1/INSIG1/MSMO1/HMGCS1/FGF1	13
285	downregulated.Antt vs VC	Downregulated	Antt vs VC	BP	GO:0090303	Positive regulation of wound healing	13/1101	58/18800	2.37457e-05	0.000438547	0.000331058	HBEGF/FERMT2/MYLK/FOXC2/TBXA2R/ST3GAL4/SERPINE1/F2R/ACTG1/KANK1/PLPP3/THBS1/F3	13
286	downregulated.Antt vs VC	Downregulated	Antt vs VC	BP	GO:1902653	Secondary alcohol biosynthetic process	13/1101	58/18800	2.37457e-05	0.000438547	0.000331058	HMGCR/NSDHL/LBR/DHCR24/LSS/ACLY/CYP51A1/EBP/FDFT1/INSIG1/MSMO1/HMGCS1/FGF1	13
287	downregulated.Antt vs VC	Downregulated	Antt vs VC	BP	GO:0051960	Regulation of nervous system development	48/1101	440/18800	2.46863e-05	0.000454331	0.000342973	PLXNA1/DBN1/EPHB2/LPIN1/CDKN2B/LDLR/MYRF/HMGB2/RARG/NLGN2/HIF1A/TGFB1/NF2/AGRN/BAIAP2/NIN/ZNF365/NOTCH1/NUMBL/SRF/EZH2/DLX1/GLI3/BMPR2/SHANK3/FLRT2/CLCF1/NEFL/PLXND1/HES6/ASPM/DAAM2/PLXNA4/DIXDC1/WNT7A/VEGFC/SEMA7A/ST8SIA2/BDNF/ID1/E2F1/SEMA3C/TIAM2/LHX2/WNT3/LIN28A/OXTR/ZNF488	48
288	downregulated.Antt vs VC	Downregulated	Antt vs VC	BP	GO:0060993	Kidney morphogenesis	17/1101	93/18800	2.49439e-05	0.00045698	0.000344973	PTCH1/SOX9/FOXD1/GLI3/LHX1/BASP1/IRX3/GCNT1/LAMA5/WNT7B/PDGFRB/SIX2/SALL1/FGF1/SOX4/LGR4/BMP4	17
289	downregulated.Antt vs VC	Downregulated	Antt vs VC	BP	GO:0030509	Bmp signaling pathway	24/1101	162/18800	2.50033e-05	0.00045698	0.000344973	CRIM1/RGMB/TGFB1/NOTCH1/SMURF2/FOXD1/CCN1/DLX1/BMPR2/RUNX2/SMAD3/BAMBI/FSTL1/HOXA13/BMPER/TGFB3/MSX2/SMAD9/TGFBR3/SMAD6/FST/TGFB2/DLX5/BMP4	24
290	downregulated.Antt vs VC	Downregulated	Antt vs VC	BP	GO:0045217	Cell-cell junction maintenance	7/1101	17/18800	2.68093e-05	0.00048672	0.000367424	KIRREL1/NLGN2/FERMT2/F2RL1/PLEKHA7/F2R/INAVA	7
291	downregulated.Antt vs VC	Downregulated	Antt vs VC	BP	GO:0045214	Sarcomere organization	11/1101	43/18800	2.68148e-05	0.00048672	0.000367424	FHOD3/SRF/ANKRD1/WDR1/NKX2-5/ACTG1/TPM1/LDB3/SYNPO2L/MYPN/EDN1	11
292	downregulated.Antt vs VC	Downregulated	Antt vs VC	BP	GO:0055002	Striated muscle cell development	14/1101	67/18800	2.71442e-05	0.000491012	0.000370664	SDC1/FHOD3/SRF/ANKRD1/TMOD2/WDR1/NKX2-5/ACTG1/PDGFRB/TPM1/LDB3/SYNPO2L/MYPN/EDN1	14
293	downregulated.Antt vs VC	Downregulated	Antt vs VC	BP	GO:0071103	Dna conformation change	18/1101	103/18800	2.74461e-05	0.00049478	0.000373508	HMGB2/RAD54L/MCM3/MCM2/HMGB1/BLM/HMGB3/ERCC6L/DNA2/GINS1/TOP2A/PIF1/GINS2/ERCC2/RAD51/MCM5/RAD54B/BRIP1	18
294	downregulated.Antt vs VC	Downregulated	Antt vs VC	BP	GO:0061326	Renal tubule development	17/1101	94/18800	2.88132e-05	0.000517658	0.000390778	PTCH1/NOTCH1/SOX9/FOXD1/GLI3/LHX1/IRX3/COL4A1/LAMA5/WNT7B/CD24/SIX2/SALL1/FGF1/LGR4/LGR5/BMP4	17
295	downregulated.Antt vs VC	Downregulated	Antt vs VC	BP	GO:0032331	Negative regulation of chondrocyte differentiation	8/1101	23/18800	2.99856e-05	0.000536895	0.0004053	EFEMP1/RARG/ADAMTS12/SOX9/SNAI2/RFLNB/ZNF664-RFLNA/BMP4	8
296	downregulated.Antt vs VC	Downregulated	Antt vs VC	BP	GO:0043534	Blood vessel endothelial cell migration	25/1101	175/18800	3.20432e-05	0.000571798	0.000431649	EMP2/STARD13/HIF1A/MYH9/TGFB1/HMGB1/EPHA2/NOTCH1/JCAD/SRF/HSPB1/PDGFB/FOXC2/TBXA2R/ATP2B4/VEGFC/EFNB2/PIK3R3/ID1/RHOJ/THBS1/SOX18/FGFBP1/PLK2/CARD10	25
297	downregulated.Antt vs VC	Downregulated	Antt vs VC	BP	GO:0150116	Regulation of cell-substrate junction organization	14/1101	68/18800	3.23605e-05	0.000575516	0.000434455	COL16A1/IQSEC1/ROCK2/CORO1C/PEAK1/LIMCH1/FERMT2/SMAD3/VCL/PHLDB2/S100A10/ACTG1/PTPRJ/THBS1	14
298	downregulated.Antt vs VC	Downregulated	Antt vs VC	BP	GO:0002040	Sprouting angiogenesis	26/1101	186/18800	3.29287e-05	0.000579977	0.000437823	PKM/CEMIP2/STARD13/EPHA2/NOTCH1/JCAD/SRF/FOXC2/TBXA2R/RECK/BMPER/GLUL/VEGFC/EFNB2/PIK3R3/E2F8/RHOJ/E2F2/CCBE1/THBS1/FGF1/FGFBP1/CREB3L1/PLK2/CARD10/BMP4	26
299	downregulated.Antt vs VC	Downregulated	Antt vs VC	BP	GO:0042303	Molting cycle	19/1101	114/18800	3.3025e-05	0.000579977	0.000437823	PPP1R13L/NSDHL/PDGFA/NOTCH1/SOX9/GLI2/ALX4/LAMA5/ERCC2/MSX2/FGFR2/FST/LHX2/SOX18/INHBA/TNFRSF19/LGR4/TGFB2/LGR5	19
300	downregulated.Antt vs VC	Downregulated	Antt vs VC	BP	GO:0042633	Hair cycle	19/1101	114/18800	3.3025e-05	0.000579977	0.000437823	PPP1R13L/NSDHL/PDGFA/NOTCH1/SOX9/GLI2/ALX4/LAMA5/ERCC2/MSX2/FGFR2/FST/LHX2/SOX18/INHBA/TNFRSF19/LGR4/TGFB2/LGR5	19
301	downregulated.Antt vs VC	Downregulated	Antt vs VC	BP	GO:0003073	Regulation of systemic arterial blood pressure	17/1101	95/18800	3.3206e-05	0.000579977	0.000437823	EMP2/PLCB3/BMPR2/GAS6/DDAH1/ARHGAP42/PDGFB/F2RL1/NR2F2/F2R/ADORA1/ADRA1D/ADRB2/NPPB/TPM1/OXTR/EDN1	17
302	downregulated.Antt vs VC	Downregulated	Antt vs VC	BP	GO:0014033	Neural crest cell differentiation	17/1101	95/18800	3.3206e-05	0.000579977	0.000437823	ANXA6/NRP2/TCOF1/CORO1C/HIF1A/SOX9/CITED2/FOXC2/SNAI2/LAMA5/PITX2/SEMA7A/KITLG/SEMA3C/NRG1/EDN1/BMP4	17
303	downregulated.Antt vs VC	Downregulated	Antt vs VC	BP	GO:0070372	Regulation of erk1 and erk2 cascade	37/1101	311/18800	3.32701e-05	0.000579977	0.000437823	CD44/EPHB2/TIMP3/TGFB1/HMGB1/PDGFA/EPHA2/NOTCH1/FERMT2/AKAP12/CCN1/DENND2B/GAS6/PDGFB/F2RL1/C1QL4/CNKSR3/BMPER/PDGFC/SEMA7A/ROS1/ACKR3/SIRPA/F2R/PDGFRB/ADCYAP1/EZR/FAM83D/GLIPR2/FGFR2/ACTA2/CCN2/FGF1/FGFR3/GBP1/NRG1/BMP4	37
304	downregulated.Antt vs VC	Downregulated	Antt vs VC	BP	GO:0007052	Mitotic spindle organization	20/1101	124/18800	3.37775e-05	0.000586885	0.000443038	NEK6/KIF23/TACC3/CENPE/KIF4A/NUF2/PSRC1/DLGAP5/NEK2/CCNB1/AURKB/KIFC1/CDC20/MYBL2/GNAI1/STMN1/SPC25/PLK1/PLK2/MISP	20
305	downregulated.Antt vs VC	Downregulated	Antt vs VC	BP	GO:0016049	Cell growth	51/1101	484/18800	3.52772e-05	0.000610932	0.000461191	PLXNA1/EXTL3/NRP2/DBN1/JADE1/TEAD1/RARG/BCAR1/TGFB1/PSRC1/HDGFL2/HBEGF/HYAL2/NIN/PDLIM5/SOX9/SRF/IGFBPL1/BMPR2/SH3BP4/PLCE1/SOCS2/SGK1/CCDC85B/CRYAB/CDKN2C/DDR1/SMAD3/EXOSC9/AUTS2/RPS6KA1/PLXNA4/SORBS2/VCL/SEMA7A/ST8SIA2/ROS1/FHL1/PTPRJ/SFN/BDNF/SEMA3C/LHX2/NPPB/TMEM97/N6AMT1/RGS4/INHBA/WNT3/TGFB2/EDN1	51
306	downregulated.Antt vs VC	Downregulated	Antt vs VC	BP	GO:0046578	Regulation of ras protein signal transduction	26/1101	187/18800	3.61596e-05	0.000624166	0.000471181	EPHB2/IQSEC1/LPAR1/ITPKB/STARD13/EPS8/CYTH3/FOXM1/NOTCH1/PLCE1/ARHGAP42/EPS8L2/AUTS2/F2RL1/STMN1/STARD8/F2R/KITLG/KANK1/PDGFRB/KANK2/SYNPO2L/NRG1/TGFB2/LPAR4/RIPOR2	26
307	downregulated.Antt vs VC	Downregulated	Antt vs VC	BP	GO:0032872	Regulation of stress-activated mapk cascade	27/1101	198/18800	3.65633e-05	0.000627845	0.000473958	TRAF2/GADD45B/DACT1/IGF1R/PHLPP1/MAPKBP1/HMGB1/MID1/FZD7/FAS/FOXM1/MECOM/MDFIC/PBK/MAGI3/F2RL1/DIXDC1/WNT7A/WNT7B/SIRPA/EZR/SH3RF2/INAVA/CCN2/TNFRSF19/TGFB2/BMP4	27
308	downregulated.Antt vs VC	Downregulated	Antt vs VC	BP	GO:0070168	Negative regulation of biomineral tissue development	9/1101	30/18800	3.66104e-05	0.000627845	0.000473958	ROCK2/HIF1A/TGFB1/BCOR/NOTCH1/SOX9/GAS6/RFLNB/ZNF664-RFLNA	9
309	downregulated.Antt vs VC	Downregulated	Antt vs VC	BP	GO:0045165	Cell fate commitment	33/1101	266/18800	3.78946e-05	0.000647764	0.000488996	TGFB1I1/SUFU/PTCH1/FZD7/TBX2/NOTCH1/SOX9/DLX1/GLI3/NOTCH3/RUNX2/PITX1/MITF/NKX2-5/ETS2/GLI2/FOXC2/HOXA13/TOX/WNT7A/WNT7B/NR2F2/TEAD4/SIX2/WNT5B/FGFR2/SOX18/NTF4/PRDM1/WNT3/NRG1/EDN1/BMP4	33
310	downregulated.Antt vs VC	Downregulated	Antt vs VC	BP	GO:0055006	Cardiac cell development	16/1101	87/18800	3.96669e-05	0.000675873	0.000510215	FHOD3/PDLIM5/NOTCH1/SRF/LMNA/NKX2-5/FHL2/SORBS2/SLC8A1/CDK1/TGFBR3/PDGFRB/ALPK2/RGS4/EDN1/BMP4	16
311	downregulated.Antt vs VC	Downregulated	Antt vs VC	BP	GO:0045653	Negative regulation of megakaryocyte differentiation	7/1101	18/18800	4.16541e-05	0.000707449	0.000534052	H4C12/H4C3/H4C8/H4C11/H4C14/H4C15/H4C2	7
312	downregulated.Antt vs VC	Downregulated	Antt vs VC	BP	GO:0061982	Meiosis i cell cycle process	21/1101	136/18800	4.23269e-05	0.000716573	0.000540939	CCNB2/TEX11/RAD54L/RMI1/CENPX/CDC25C/PTTG1/FBXO5/ESPL1/TOP2A/CDC25A/CDC25B/RAD51/SHOC1/FMN2/BRME1/PLK1/RAD54B/BRIP1/MYBL1/CCNE2	21
313	downregulated.Antt vs VC	Downregulated	Antt vs VC	BP	GO:0050679	Positive regulation of epithelial cell proliferation	28/1101	211/18800	4.34846e-05	0.000733821	0.000553959	NRP2/HMGB2/HIF1A/IQGAP3/HMGB1/FZD7/NOTCH1/JCAD/SOX9/BMPR2/PIK3CD/PDGFB/EGF/ZNF703/CCND1/WNT7A/APLN/GLUL/VEGFC/ID1/DLX6/FGFR2/CAV2/FGF1/FGFBP1/DLX5/F3/BMP4	28
314	downregulated.Antt vs VC	Downregulated	Antt vs VC	BP	GO:0051403	Stress-activated mapk cascade	31/1101	245/18800	4.41451e-05	0.000742594	0.000560582	HACD3/MAP3K20/TRAF2/GADD45B/DACT1/IGF1R/PHLPP1/MAPKBP1/HMGB1/MID1/FZD7/FAS/FOXM1/CRYAB/MECOM/MDFIC/SMAD3/PBK/MAGI3/F2RL1/DIXDC1/WNT7A/WNT7B/SIRPA/EZR/SH3RF2/INAVA/CCN2/TNFRSF19/TGFB2/BMP4	31
315	downregulated.Antt vs VC	Downregulated	Antt vs VC	BP	GO:1904888	Cranial skeletal system development	14/1101	70/18800	4.54865e-05	0.000762728	0.000575782	NDST1/GLI3/RUNX2/FOXN3/SMAD3/LHX1/FOXC2/TGFB3/MSX2/SIX2/FGFR2/INSIG1/TGFB2/BMP4	14
316	downregulated.Antt vs VC	Downregulated	Antt vs VC	BP	GO:0033260	Nuclear dna replication	10/1101	38/18800	4.77343e-05	0.000794062	0.000599435	PCNA/MCM3/MCM2/ATAD5/BLM/GMNN/DNA2/GINS1/RAD51/CDC7	10
317	downregulated.Antt vs VC	Downregulated	Antt vs VC	BP	GO:0070302	Regulation of stress-activated protein kinase signaling cascade	27/1101	201/18800	4.77356e-05	0.000794062	0.000599435	TRAF2/GADD45B/DACT1/IGF1R/PHLPP1/MAPKBP1/HMGB1/MID1/FZD7/FAS/FOXM1/MECOM/MDFIC/PBK/MAGI3/F2RL1/DIXDC1/WNT7A/WNT7B/SIRPA/EZR/SH3RF2/INAVA/CCN2/TNFRSF19/TGFB2/BMP4	27
318	downregulated.Antt vs VC	Downregulated	Antt vs VC	BP	GO:0051988	Regulation of attachment of spindle microtubules to kinetochore	6/1101	13/18800	4.78061e-05	0.000794062	0.000599435	KNSTRN/ECT2/SPAG5/NEK2/CCNB1/AURKB	6
319	downregulated.Antt vs VC	Downregulated	Antt vs VC	BP	GO:0061384	Heart trabecula morphogenesis	9/1101	31/18800	4.8921e-05	0.000807502	0.000609581	NOTCH1/SRF/NKX2-5/FHL2/ADGRG6/TGFBR3/S1PR1/NRG1/TGFB2	9
320	downregulated.Antt vs VC	Downregulated	Antt vs VC	BP	GO:0110150	Negative regulation of biomineralization	9/1101	31/18800	4.8921e-05	0.000807502	0.000609581	ROCK2/HIF1A/TGFB1/BCOR/NOTCH1/SOX9/GAS6/RFLNB/ZNF664-RFLNA	9
321	downregulated.Antt vs VC	Downregulated	Antt vs VC	BP	GO:0060349	Bone morphogenesis	17/1101	98/18800	5.01542e-05	0.000825279	0.000623001	ANXA6/RARG/SOX9/GLI3/BMPR2/RUNX2/FOXN3/CITED2/DHRS3/TGFB3/MSX2/AXIN2/FGFR2/INSIG1/FGFR3/DLX5/BMP4	17
322	downregulated.Antt vs VC	Downregulated	Antt vs VC	BP	GO:0051962	Positive regulation of nervous system development	33/1101	270/18800	5.10967e-05	0.000838176	0.000632737	PLXNA1/DBN1/EPHB2/NLGN2/HIF1A/TGFB1/AGRN/BAIAP2/NIN/ZNF365/NOTCH1/NUMBL/SRF/GLI3/BMPR2/SHANK3/FLRT2/CLCF1/NEFL/PLXND1/ASPM/PLXNA4/DIXDC1/WNT7A/VEGFC/SEMA7A/ST8SIA2/BDNF/E2F1/TIAM2/WNT3/OXTR/ZNF488	33
323	downregulated.Antt vs VC	Downregulated	Antt vs VC	BP	GO:0097581	Lamellipodium organization	16/1101	89/18800	5.29428e-05	0.00086577	0.000653567	ACTR3/CD44/AJUBA/CORO1C/ARPIN/MTSS2/ABLIM1/EPHA2/FSCN1/PLCE1/CCDC88A/CARMIL2/AUTS2/VCL/KANK1/S1PR1	16
324	downregulated.Antt vs VC	Downregulated	Antt vs VC	BP	GO:0048017	Inositol lipid-mediated signaling	25/1101	181/18800	5.66188e-05	0.000923027	0.000696791	TYRO3/IGF1R/PLCB3/PRR5L/PLD2/PDGFA/PITPNM2/SOX9/PLCE1/PLCD3/PIK3CD/PDGFB/PLCL2/EGF/F2RL1/PDGFC/INPP5E/PLCB4/F2R/PDGFRB/NKX3-1/EZR/IRS1/TGFB2/EDN1	25
325	downregulated.Antt vs VC	Downregulated	Antt vs VC	BP	GO:0090263	Positive regulation of canonical wnt signaling pathway	18/1101	109/18800	5.98079e-05	0.000968974	0.000731476	DACT1/TGFB1/TBL1XR1/SMURF2/SMAD3/BAMBI/EGF/ASPM/DAAM2/RECK/KANK1/LYPD6/FGFR2/CAV1/SOX4/LGR4/DLX5/LGR5	18
326	downregulated.Antt vs VC	Downregulated	Antt vs VC	BP	GO:0051893	Regulation of focal adhesion assembly	13/1101	63/18800	5.99876e-05	0.000968974	0.000731476	COL16A1/ROCK2/CORO1C/PEAK1/LIMCH1/FERMT2/SMAD3/VCL/PHLDB2/S100A10/ACTG1/PTPRJ/THBS1	13
327	downregulated.Antt vs VC	Downregulated	Antt vs VC	BP	GO:0090109	Regulation of cell-substrate junction assembly	13/1101	63/18800	5.99876e-05	0.000968974	0.000731476	COL16A1/ROCK2/CORO1C/PEAK1/LIMCH1/FERMT2/SMAD3/VCL/PHLDB2/S100A10/ACTG1/PTPRJ/THBS1	13
328	downregulated.Antt vs VC	Downregulated	Antt vs VC	BP	GO:1903036	Positive regulation of response to wounding	14/1101	72/18800	6.30482e-05	0.00101305	0.00076475	IGF1R/HBEGF/FERMT2/MYLK/FOXC2/TBXA2R/ST3GAL4/SERPINE1/F2R/ACTG1/KANK1/PLPP3/THBS1/F3	14
329	downregulated.Antt vs VC	Downregulated	Antt vs VC	BP	GO:0021675	Nerve development	15/1101	81/18800	6.30999e-05	0.00101305	0.00076475	NRP2/EPHB2/ATP8B1/TCIRG1/GLI3/CITED2/KCNA2/PLXNA4/SLC1A3/ACKR3/BDNF/NTF3/SALL1/NTF4/EDN1	15
330	downregulated.Antt vs VC	Downregulated	Antt vs VC	BP	GO:0003179	Heart valve morphogenesis	12/1101	55/18800	6.44799e-05	0.00102694	0.000775232	ROCK2/TGFB1/NOTCH1/SOX9/CCN1/BMPR2/NKX2-5/SNAI2/SMAD6/SOX4/TGFB2/BMP4	12
331	downregulated.Antt vs VC	Downregulated	Antt vs VC	BP	GO:0048008	Platelet-derived growth factor receptor signaling pathway	12/1101	55/18800	6.44799e-05	0.00102694	0.000775232	MYO1E/BCAR1/PDGFA/CSPG4/PDGFB/HIP1/PLAT/PDGFC/ARID5B/PDGFRB/PTPRJ/F3	12
332	downregulated.Antt vs VC	Downregulated	Antt vs VC	BP	GO:0003338	Metanephros morphogenesis	9/1101	32/18800	6.45481e-05	0.00102694	0.000775232	SOX9/LHX1/BASP1/WNT7B/PDGFRB/SIX2/SALL1/LGR4/BMP4	9
333	downregulated.Antt vs VC	Downregulated	Antt vs VC	BP	GO:0050878	Regulation of body fluid levels	42/1101	382/18800	6.52232e-05	0.00103456	0.000780988	TYRO3/AXL/EPHB2/DGKH/STAT5B/EMP2/HIF1A/MYH9/WFS1/PDGFA/HYAL2/FLI1/SRF/RAP2B/GAS6/SOCS2/DDR1/ACTB/HSPB1/PDGFB/KCNN4/SLC29A1/F2RL1/TBXA2R/ANXA8/STMN1/CCND1/APLN/ST3GAL4/PLAT/VCL/SERPINE1/F2R/ACTG1/SFN/ADORA1/NPPB/THBS1/CAV1/OXTR/F3/EDN1	42
334	downregulated.Antt vs VC	Downregulated	Antt vs VC	BP	GO:0007093	Mitotic cell cycle checkpoint signaling	20/1101	130/18800	6.73677e-05	0.00106538	0.000804252	CLSPN/TICRR/BUB1B/MAP3K20/XRCC3/CCNB1/AURKB/BLM/CENPF/GTSE1/FOXN3/DTL/NABP1/CCND1/SPDL1/ZWINT/CDK1/PLK1/CDK2/PLK2	20
335	downregulated.Antt vs VC	Downregulated	Antt vs VC	BP	GO:0008360	Regulation of cell shape	22/1101	151/18800	6.93032e-05	0.00109271	0.000824888	PLXNA1/LPAR1/PALM2AKAP2/FBLIM1/MYH9/EPS8/BAIAP2/FERMT2/RHOBTB3/ITGA7/FAM171A1/WDR1/BAMBI/PLXND1/STRIP2/CDC42EP3/RHOB/PLXNA4/EZR/RHOJ/SHROOM3/TPM1	22
336	downregulated.Antt vs VC	Downregulated	Antt vs VC	BP	GO:0051054	Positive regulation of dna metabolic process	32/1101	263/18800	7.19752e-05	0.00112908	0.000852342	PCNA/LPIN1/NSD2/IGF1R/ATAD5/TGFB1/HDGFL2/NEK2/TIMELESS/HMGB1/FOXM1/AURKB/CLCF1/ACTB/DNA2/PDGFB/BAZ1A/GINS1/EGF/GLI2/BCAR3/GINS2/ERCC2/TOX/RAD51/H2AX/FMN2/CDK1/CDC7/PDGFRB/E2F8/CDK2	32
337	downregulated.Antt vs VC	Downregulated	Antt vs VC	BP	GO:0032200	Telomere organization	23/1101	162/18800	7.20373e-05	0.00112908	0.000852342	PCNA/H4C12/NEK2/XRCC3/EXO1/AURKB/ZNF365/H4C3/BLM/H4C8/EZH2/H4C11/H4C14/H3C10/DNA2/H4C15/H3C2/PIF1/H4C2/RAD51/H3C1/H3C3/CCNE2	23
338	downregulated.Antt vs VC	Downregulated	Antt vs VC	BP	GO:0120032	Regulation of plasma membrane bounded cell projection assembly	26/1101	195/18800	7.42072e-05	0.00115965	0.000875418	ACTR3/EPHB2/CORO1C/FNBP1L/EPS8/ATP8B1/EPHA2/AGRN/PODXL/SRF/FSCN1/PLCE1/CCDC88A/EPS8L2/LIMK2/CARMIL2/CDC42EP3/AUTS2/DAAM2/F2RL1/TENM2/ANLN/TGFB3/KANK1/CAV1/RIPOR2	26
339	downregulated.Antt vs VC	Downregulated	Antt vs VC	BP	GO:0031098	Stress-activated protein kinase signaling cascade	31/1101	252/18800	7.54909e-05	0.00117623	0.000887935	HACD3/MAP3K20/TRAF2/GADD45B/DACT1/IGF1R/PHLPP1/MAPKBP1/HMGB1/MID1/FZD7/FAS/FOXM1/CRYAB/MECOM/MDFIC/SMAD3/PBK/MAGI3/F2RL1/DIXDC1/WNT7A/WNT7B/SIRPA/EZR/SH3RF2/INAVA/CCN2/TNFRSF19/TGFB2/BMP4	31
340	downregulated.Antt vs VC	Downregulated	Antt vs VC	BP	GO:0055007	Cardiac muscle cell differentiation	19/1101	121/18800	7.65739e-05	0.0011896	0.000898025	FHOD3/TGFB1/FZD7/PDLIM5/SRF/LMNA/NKX2-5/FHL2/IRX3/SORBS2/SLC8A1/CDK1/EFNB2/PDGFRB/ALPK2/RGS4/NRG1/EDN1/BMP4	19
341	downregulated.Antt vs VC	Downregulated	Antt vs VC	BP	GO:0031529	Ruffle organization	12/1101	56/18800	7.77395e-05	0.00120375	0.00090871	CORO1C/MTSS2/EPS8/TCIRG1/CSPG4/EPS8L2/CARMIL2/ARHGEF26/KANK1/LIMA1/TPM1/CAV1	12
342	downregulated.Antt vs VC	Downregulated	Antt vs VC	BP	GO:0010001	Glial cell differentiation	28/1101	218/18800	7.79408e-05	0.00120375	0.00090871	VIM/CNP/LDLR/MYRF/TGFB1/ZNF365/NOTCH1/SOX9/DLX1/GLI3/MMP24/CDK6/CLCF1/CDKN2C/WDR1/BOK/ADGRG6/DAAM2/ERCC2/NFIB/CDK1/FGF5/TSPAN2/SOX4/TRPC4/NRG1/LIN28A/ZNF488	28
343	downregulated.Antt vs VC	Downregulated	Antt vs VC	BP	GO:0055123	Digestive system development	21/1101	142/18800	8.06739e-05	0.00124233	0.000937832	DACT1/HIF1A/TBX2/NOTCH1/GLI3/SMAD3/GLI2/HOXA13/ALX4/TGFB3/TYMS/PDGFC/FOXF2/SIX2/FGFR2/SALL1/PRDM1/LGR4/TGFB2/OXTR/BMP4	21
344	downregulated.Antt vs VC	Downregulated	Antt vs VC	BP	GO:0050767	Regulation of neurogenesis	40/1101	361/18800	8.14552e-05	0.00124603	0.000940626	PLXNA1/DBN1/EPHB2/CDKN2B/LDLR/HMGB2/HIF1A/TGFB1/NF2/BAIAP2/NIN/ZNF365/NOTCH1/NUMBL/SRF/EZH2/DLX1/GLI3/BMPR2/SHANK3/CLCF1/NEFL/PLXND1/HES6/ASPM/DAAM2/PLXNA4/DIXDC1/WNT7A/VEGFC/SEMA7A/BDNF/ID1/E2F1/SEMA3C/TIAM2/LHX2/WNT3/LIN28A/ZNF488	40
345	downregulated.Antt vs VC	Downregulated	Antt vs VC	BP	GO:1901653	Cellular response to peptide	40/1101	361/18800	8.14552e-05	0.00124603	0.000940626	RANGAP1/NUCKS1/SIK2/VIM/PKM/EPHB2/LPIN1/PXN/ROCK2/SOGA1/KAT2B/IGF1R/STAT5B/BCAR1/RAB15/ERFE/TIMELESS/TNS2/RAB31/BAIAP2/SOCS3/SOCS2/SESN3/PNPLA3/FOXC2/BCAR3/PLAT/CCNA2/KLF11/PIK3R3/KANK1/ID1/ADRB2/INSIG1/BRIP1/IRS1/CAV2/CAV1/PCSK9/EDN1	40
346	downregulated.Antt vs VC	Downregulated	Antt vs VC	BP	GO:0003094	Glomerular filtration	8/1101	26/18800	8.16219e-05	0.00124603	0.000940626	KIRREL1/MYO1E/EMP2/GAS6/PDGFB/F2RL1/F2R/ADORA1	8
347	downregulated.Antt vs VC	Downregulated	Antt vs VC	BP	GO:0006336	Dna replication-independent chromatin assembly	9/1101	33/18800	8.41719e-05	0.00127363	0.00096146	H4C12/H4C3/H4C8/H4C11/H4C14/NASP/H4C15/H4C2/ASF1B	9
348	downregulated.Antt vs VC	Downregulated	Antt vs VC	BP	GO:0003170	Heart valve development	13/1101	65/18800	8.43943e-05	0.00127363	0.00096146	ROCK2/TGFB1/NOTCH1/SOX9/CCN1/BMPR2/NKX2-5/SNAI2/SMAD6/PRDM1/SOX4/TGFB2/BMP4	13
349	downregulated.Antt vs VC	Downregulated	Antt vs VC	BP	GO:0031100	Animal organ regeneration	13/1101	65/18800	8.43943e-05	0.00127363	0.00096146	AXL/PCNA/LPIN1/PTCH1/NOTCH1/EZH2/GLI3/GAS6/CCND1/TYMS/CCNA2/CDK1/TGFBR3	13
350	downregulated.Antt vs VC	Downregulated	Antt vs VC	BP	GO:0051310	Metaphase plate congression	13/1101	65/18800	8.43943e-05	0.00127363	0.00096146	KIF18A/CENPE/SPAG5/NUF2/PSRC1/CDCA8/CCNB1/AURKB/KIFC1/INCENP/CENPF/SPDL1/FAM83D	13
351	downregulated.Antt vs VC	Downregulated	Antt vs VC	BP	GO:0060491	Regulation of cell projection assembly	26/1101	197/18800	8.81144e-05	0.00132598	0.00100098	ACTR3/EPHB2/CORO1C/FNBP1L/EPS8/ATP8B1/EPHA2/AGRN/PODXL/SRF/FSCN1/PLCE1/CCDC88A/EPS8L2/LIMK2/CARMIL2/CDC42EP3/AUTS2/DAAM2/F2RL1/TENM2/ANLN/TGFB3/KANK1/CAV1/RIPOR2	26
352	downregulated.Antt vs VC	Downregulated	Antt vs VC	BP	GO:0030219	Megakaryocyte differentiation	12/1101	57/18800	9.32817e-05	0.00139976	0.00105667	CDKN2B/HMGB2/H4C12/FLI1/H4C3/SRF/H4C8/PRMT6/H4C11/H4C14/H4C15/H4C2	12
353	downregulated.Antt vs VC	Downregulated	Antt vs VC	BP	GO:0051494	Negative regulation of cytoskeleton organization	23/1101	165/18800	9.58746e-05	0.00143459	0.00108297	KAT2B/FHOD3/SWAP70/GSN/ARPIN/SPTAN1/EPS8/MID1/ADD2/FKBP4/SHANK3/TMOD2/ARHGAP28/NAV3/CKAP2/CARMIL2/STMN1/CGNL1/PHLDB2/KANK1/CCNF/LIMA1/S1PR1	23
354	downregulated.Antt vs VC	Downregulated	Antt vs VC	BP	GO:1905314	Semi-lunar valve development	10/1101	41/18800	9.64269e-05	0.00143878	0.00108613	ROCK2/TGFB1/NOTCH1/SOX9/BMPR2/NKX2-5/SNAI2/SMAD6/TGFB2/BMP4	10
355	downregulated.Antt vs VC	Downregulated	Antt vs VC	BP	GO:0044344	Cellular response to fibroblast growth factor stimulus	18/1101	113/18800	9.69508e-05	0.00144252	0.00108895	CD44/NDST1/TBX2/HYAL2/FLRT2/RUNX2/LHX1/FAM20C/APLN/FGF5/FGFR2/THBS1/CCN2/FGF1/FGFR3/FGFBP1/CREB3L1/HHIP	18
356	downregulated.Antt vs VC	Downregulated	Antt vs VC	BP	GO:0035050	Embryonic heart tube development	15/1101	84/18800	9.73455e-05	0.00144432	0.00109032	MICAL2/SUFU/HIF1A/TBX2/NOTCH1/SRF/CITED2/SMAD3/NKX2-5/FOXC2/PLXNA4/PITX2/TEAD2/SOX18/EDN1	15
357	downregulated.Antt vs VC	Downregulated	Antt vs VC	BP	GO:0042063	Gliogenesis	34/1101	291/18800	9.77935e-05	0.00144691	0.00109227	VIM/CNP/CDKN2B/LDLR/MYRF/TGFB1/NF2/ZNF365/NOTCH1/SOX9/CSPG4/EZH2/DLX1/GLI3/MMP24/CDK6/CLCF1/CDKN2C/WDR1/BOK/ADGRG6/DAAM2/ERCC2/NFIB/CDK1/FGF5/E2F1/TSPAN2/SOX4/TRPC4/NRG1/LIN28A/TGFB2/ZNF488	34
358	downregulated.Antt vs VC	Downregulated	Antt vs VC	BP	GO:0045005	Dna-templated dna replication maintenance of fidelity	11/1101	49/18800	9.83117e-05	0.00145051	0.00109499	NUCKS1/PCNA/CENPX/TIMELESS/MMS22L/ZNF365/BLM/POLE/DNA2/TONSL/RAD51	11
359	downregulated.Antt vs VC	Downregulated	Antt vs VC	BP	GO:0030193	Regulation of blood coagulation	13/1101	66/18800	9.95315e-05	0.00146035	0.00110241	EPHB2/PDGFA/PDGFB/F2RL1/TBXA2R/ST3GAL4/PLAT/SERPINE1/F2R/THBS1/CAV1/F3/EDN1	13
360	downregulated.Antt vs VC	Downregulated	Antt vs VC	BP	GO:0030239	Myofibril assembly	13/1101	66/18800	9.95315e-05	0.00146035	0.00110241	FHOD3/SRF/ANKRD1/TMOD2/WDR1/NKX2-5/ACTG1/PDGFRB/TPM1/LDB3/SYNPO2L/MYPN/EDN1	13
361	downregulated.Antt vs VC	Downregulated	Antt vs VC	BP	GO:0001738	Morphogenesis of a polarized epithelium	16/1101	94/18800	0.000104548	0.00152127	0.0011484	DACT1/AJAP1/FZD7/SMURF2/FAT1/WDR1/ACTB/VANGL1/FZD2/LAMA5/WNT7A/PRICKLE1/PRICKLE2/ACTG1/FOXF2/NKD1	16
362	downregulated.Antt vs VC	Downregulated	Antt vs VC	BP	GO:0009798	Axis specification	16/1101	94/18800	0.000104548	0.00152127	0.0011484	PTCH1/BCOR/NOTCH1/SRF/CITED2/LHX1/BASP1/ETS2/WNT7A/PITX2/AXIN2/SMAD6/SIX2/PKD1L1/WNT3/BMP4	16
363	downregulated.Antt vs VC	Downregulated	Antt vs VC	BP	GO:0048709	Oligodendrocyte differentiation	16/1101	94/18800	0.000104548	0.00152127	0.0011484	CNP/MYRF/ZNF365/NOTCH1/SOX9/DLX1/GLI3/CDKN2C/WDR1/BOK/DAAM2/ERCC2/TSPAN2/TRPC4/NRG1/ZNF488	16
364	downregulated.Antt vs VC	Downregulated	Antt vs VC	BP	GO:0048015	Phosphatidylinositol-mediated signaling	24/1101	177/18800	0.000106112	0.00153978	0.00116238	TYRO3/IGF1R/PLCB3/PRR5L/PDGFA/PITPNM2/SOX9/PLCE1/PLCD3/PIK3CD/PDGFB/PLCL2/EGF/F2RL1/PDGFC/INPP5E/PLCB4/F2R/PDGFRB/NKX3-1/EZR/IRS1/TGFB2/EDN1	24
365	downregulated.Antt vs VC	Downregulated	Antt vs VC	BP	GO:0031346	Positive regulation of cell projection organization	38/1101	341/18800	0.000107851	0.00156073	0.00117819	ACTR3/PLXNA1/DBN1/EPHB2/CORO1C/IGF1R/FNBP1L/EPS8/AGRN/BAIAP2/NIN/SRF/EZH2/FSCN1/BMPR2/FZD4/PLCE1/CCDC88A/NEFL/PLXND1/EPS8L2/LRRC7/CARMIL2/CDC42EP3/AUTS2/F2RL1/PLXNA4/DIXDC1/TENM2/ANLN/TOX/TGFB3/SEMA7A/BDNF/ENC1/TIAM2/WNT3/RIPOR2	38
366	downregulated.Antt vs VC	Downregulated	Antt vs VC	BP	GO:0034724	Dna replication-independent chromatin organization	9/1101	34/18800	0.000108568	0.00156682	0.00118279	H4C12/H4C3/H4C8/H4C11/H4C14/NASP/H4C15/H4C2/ASF1B	9
367	downregulated.Antt vs VC	Downregulated	Antt vs VC	BP	GO:0051098	Regulation of binding	40/1101	366/18800	0.000109865	0.00157553	0.00118937	NUCKS1/RALB/CALM3/DACT1/HMGB2/ANXA2/SUMO3/ZNF618/TGFB1/NEK2/HMGB1/ADD2/AURKB/GMNN/ARHGAP28/SMAD3/BAMBI/PLXND1/ACTB/PDGFB/PLCL2/EGF/STMN1/BCL3/ERCC2/SPON1/MSX2/TGFBR3/S100A10/PLK1/BDNF/ID1/E2F1/ADRB2/LHX2/CAV1/PCSK9/LFNG/RIPOR2/BMP4	40
368	downregulated.Antt vs VC	Downregulated	Antt vs VC	BP	GO:0072012	Glomerulus vasculature development	8/1101	27/18800	0.000110067	0.00157553	0.00118937	NOTCH1/NOTCH3/PDGFB/SERPINB7/FOXC2/PDGFRB/ACTA2/BMP4	8
369	downregulated.Antt vs VC	Downregulated	Antt vs VC	BP	GO:0097205	Renal filtration	8/1101	27/18800	0.000110067	0.00157553	0.00118937	KIRREL1/MYO1E/EMP2/GAS6/PDGFB/F2RL1/F2R/ADORA1	8
370	downregulated.Antt vs VC	Downregulated	Antt vs VC	BP	GO:0060560	Developmental growth involved in morphogenesis	29/1101	234/18800	0.00011138	0.00158851	0.00119916	PLXNA1/NRP2/DBN1/RARG/TBX2/NIN/NOTCH1/SOX9/SRF/BMPR2/DDR1/LHX1/AUTS2/PLXNA4/WNT7B/VCL/SEMA7A/ST8SIA2/BDNF/FGFR2/SEMA3C/LHX2/SALL1/FGF1/NKD1/S1PR1/WNT3/EDN1/BMP4	29
371	downregulated.Antt vs VC	Downregulated	Antt vs VC	BP	GO:0022604	Regulation of cell morphogenesis	35/1101	305/18800	0.000111574	0.00158851	0.00119916	PLXNA1/CD44/DBN1/EPHB2/LPAR1/PALM2AKAP2/CORO1C/FBLIM1/ZMYM3/ARPIN/MYH9/EPS8/BAIAP2/FERMT2/RHOBTB3/FZD4/ITGA7/FAM171A1/WDR1/BAMBI/PLXND1/WTIP/STRIP2/CDC42EP3/ACTN4/RHOB/NEDD9/PLXNA4/S100A10/KANK1/EZR/RHOJ/SHROOM3/TPM1/GBP1	35
372	downregulated.Antt vs VC	Downregulated	Antt vs VC	BP	GO:0008543	Fibroblast growth factor receptor signaling pathway	15/1101	85/18800	0.000111901	0.00158888	0.00119944	NDST1/TBX2/FLRT2/RUNX2/FAM20C/APLN/FGF5/FGFR2/THBS1/CCN2/FGF1/FGFR3/FGFBP1/CREB3L1/HHIP	15
373	downregulated.Antt vs VC	Downregulated	Antt vs VC	BP	GO:0061333	Renal tubule morphogenesis	14/1101	76/18800	0.000116541	0.00165032	0.00124582	PTCH1/SOX9/FOXD1/GLI3/LHX1/IRX3/COL4A1/LAMA5/SIX2/SALL1/FGF1/LGR4/LGR5/BMP4	14
374	downregulated.Antt vs VC	Downregulated	Antt vs VC	BP	GO:1903053	Regulation of extracellular matrix organization	11/1101	50/18800	0.000119441	0.00168387	0.00127115	ZNF469/ANTXR1/TGFB1/PHLDB1/NOTCH1/SOX9/FSCN1/DDR1/SMAD3/CARMIL2/PHLDB2	11
375	downregulated.Antt vs VC	Downregulated	Antt vs VC	BP	GO:0071375	Cellular response to peptide hormone stimulus	34/1101	294/18800	0.000119548	0.00168387	0.00127115	RANGAP1/NUCKS1/SIK2/PKM/LPIN1/PXN/ROCK2/SOGA1/KAT2B/IGF1R/STAT5B/BCAR1/RAB15/ERFE/TNS2/RAB31/BAIAP2/SOCS3/SOCS2/SESN3/PNPLA3/FOXC2/BCAR3/PLAT/CCNA2/PIK3R3/KANK1/INSIG1/BRIP1/IRS1/CAV2/CAV1/PCSK9/EDN1	34
376	downregulated.Antt vs VC	Downregulated	Antt vs VC	BP	GO:0030501	Positive regulation of bone mineralization	10/1101	42/18800	0.000119979	0.00168544	0.00127234	TGFB1/CCN1/BMPR2/SMAD3/FAM20C/SLC8A1/TGFB3/TENT5A/ADRB2/BMP4	10
377	downregulated.Antt vs VC	Downregulated	Antt vs VC	BP	GO:1901890	Positive regulation of cell junction assembly	17/1101	105/18800	0.000122208	0.00171221	0.00129255	EPHB2/COL16A1/NLGN2/EPHA2/AGRN/FERMT2/FLRT2/SMAD3/IRX3/WNT7A/ST8SIA2/S100A10/PTPRJ/CNTNAP2/BDNF/CAV1/OXTR	17
378	downregulated.Antt vs VC	Downregulated	Antt vs VC	BP	GO:0001977	Renal system process involved in regulation of blood volume	6/1101	15/18800	0.000125963	0.00175551	0.00132523	EMP2/GAS6/PDGFB/F2RL1/F2R/ADORA1	6
379	downregulated.Antt vs VC	Downregulated	Antt vs VC	BP	GO:0060413	Atrial septum morphogenesis	6/1101	15/18800	0.000125963	0.00175551	0.00132523	NSD2/CCN1/BMPR2/NKX2-5/SOX4/TGFB2	6
380	downregulated.Antt vs VC	Downregulated	Antt vs VC	BP	GO:0035330	Regulation of hippo signaling	7/1101	21/18800	0.000130319	0.00180668	0.00136386	AJUBA/NF2/CIT/MOB3B/WTIP/SCHIP1/WWC1	7
381	downregulated.Antt vs VC	Downregulated	Antt vs VC	BP	GO:0060973	Cell migration involved in heart development	7/1101	21/18800	0.000130319	0.00180668	0.00136386	NOTCH1/SNAI2/PITX2/PDGFRB/SEMA3C/EDN1/BMP4	7
382	downregulated.Antt vs VC	Downregulated	Antt vs VC	BP	GO:0030042	Actin filament depolymerization	12/1101	59/18800	0.000132506	0.00183219	0.00138312	MICAL2/SWAP70/GSN/MICAL3/SPTAN1/EPS8/ADD2/TMOD2/WDR1/CARMIL2/F2RL1/LIMA1	12
383	downregulated.Antt vs VC	Downregulated	Antt vs VC	BP	GO:1901203	Positive regulation of extracellular matrix assembly	5/1101	10/18800	0.000134269	0.00185171	0.00139785	TGFB1/PHLDB1/SOX9/SMAD3/PHLDB2	5
384	downregulated.Antt vs VC	Downregulated	Antt vs VC	BP	GO:0045132	Meiotic chromosome segregation	16/1101	96/18800	0.00013516	0.00185915	0.00140347	ACTR3/SMC4/BUB1B/TEX11/NCAPH/RMI1/NUF2/CENPX/PTTG1/ESPL1/TOP2A/SHOC1/FMN2/PLK1/BRIP1/CCNE2	16
385	downregulated.Antt vs VC	Downregulated	Antt vs VC	BP	GO:1900046	Regulation of hemostasis	13/1101	68/18800	0.000136954	0.00187894	0.0014184	EPHB2/PDGFA/PDGFB/F2RL1/TBXA2R/ST3GAL4/PLAT/SERPINE1/F2R/THBS1/CAV1/F3/EDN1	13
386	downregulated.Antt vs VC	Downregulated	Antt vs VC	BP	GO:0120034	Positive regulation of plasma membrane bounded cell projection assembly	17/1101	106/18800	0.000137746	0.00188216	0.00142084	ACTR3/FNBP1L/EPS8/AGRN/SRF/FSCN1/PLCE1/CCDC88A/EPS8L2/CARMIL2/CDC42EP3/AUTS2/F2RL1/TENM2/ANLN/TGFB3/RIPOR2	17
387	downregulated.Antt vs VC	Downregulated	Antt vs VC	BP	GO:1902904	Negative regulation of supramolecular fiber organization	23/1101	169/18800	0.000138478	0.00188216	0.00142084	LDLR/FHOD3/SWAP70/GSN/ARPIN/SPTAN1/EPS8/MID1/ADD2/FKBP4/SHANK3/CRYAB/TMOD2/ARHGAP28/NAV3/CKAP2/CARMIL2/STMN1/CGNL1/PHLDB2/KANK1/LIMA1/S1PR1	23
388	downregulated.Antt vs VC	Downregulated	Antt vs VC	BP	GO:0010762	Regulation of fibroblast migration	9/1101	35/18800	0.000138614	0.00188216	0.00142084	CORO1C/PRR5L/TGFB1/HYAL2/AKAP12/SLC8A1/THBS1/ACTA2/MACIR	9
389	downregulated.Antt vs VC	Downregulated	Antt vs VC	BP	GO:0035137	Hindlimb morphogenesis	9/1101	35/18800	0.000138614	0.00188216	0.00142084	RARG/PTCH1/NOTCH1/PITX1/ALX4/WNT7A/MSX2/WNT3/BMP4	9
390	downregulated.Antt vs VC	Downregulated	Antt vs VC	BP	GO:0045778	Positive regulation of ossification	11/1101	51/18800	0.000144318	0.00195458	0.00147551	TGFB1/CCN1/BMPR2/SMAD3/FAM20C/SLC8A1/TGFB3/TENT5A/ADRB2/TGFB2/BMP4	11
391	downregulated.Antt vs VC	Downregulated	Antt vs VC	BP	GO:0060541	Respiratory system development	26/1101	203/18800	0.00014489	0.00195732	0.00147757	RARG/TIMELESS/PDGFA/TBX2/NOTCH1/SOX9/SRF/GLI3/BMPR2/THRA/HS6ST1/BASP1/GLI2/LAMA5/TGFB3/CRISPLD2/WNT7B/NFIB/PDGFRB/FGFR2/CCBE1/CCN2/FGF1/DLX5/HHIP/BMP4	26
392	downregulated.Antt vs VC	Downregulated	Antt vs VC	BP	GO:0035116	Embryonic hindlimb morphogenesis	8/1101	28/18800	0.000146231	0.00197039	0.00148744	RARG/NOTCH1/PITX1/ALX4/WNT7A/MSX2/WNT3/BMP4	8
393	downregulated.Antt vs VC	Downregulated	Antt vs VC	BP	GO:0035023	Regulation of rho protein signal transduction	15/1101	87/18800	0.000146784	0.00197281	0.00148927	LPAR1/STARD13/EPS8/ARHGAP42/EPS8L2/F2RL1/STMN1/STARD8/F2R/KANK1/PDGFRB/KANK2/SYNPO2L/LPAR4/RIPOR2	15
394	downregulated.Antt vs VC	Downregulated	Antt vs VC	BP	GO:0033046	Negative regulation of sister chromatid segregation	10/1101	43/18800	0.00014821	0.00197688	0.00149234	BUB1B/XRCC3/CCNB1/AURKB/CENPF/PTTG1/FBXO5/SPDL1/ZWINT/PLK1	10
395	downregulated.Antt vs VC	Downregulated	Antt vs VC	BP	GO:0033048	Negative regulation of mitotic sister chromatid segregation	10/1101	43/18800	0.00014821	0.00197688	0.00149234	BUB1B/XRCC3/CCNB1/AURKB/CENPF/PTTG1/FBXO5/SPDL1/ZWINT/PLK1	10
396	downregulated.Antt vs VC	Downregulated	Antt vs VC	BP	GO:2000816	Negative regulation of mitotic sister chromatid separation	10/1101	43/18800	0.00014821	0.00197688	0.00149234	BUB1B/XRCC3/CCNB1/AURKB/CENPF/PTTG1/FBXO5/SPDL1/ZWINT/PLK1	10
397	downregulated.Antt vs VC	Downregulated	Antt vs VC	BP	GO:0006937	Regulation of muscle contraction	23/1101	170/18800	0.000151458	0.00201511	0.0015212	KCNMA1/ANXA6/CALM3/CACNA1C/DMD/HCN4/ATP1B1/SRF/PLCE1/ARHGAP42/SSTR2/NKX2-5/TBXA2R/SLC8A1/F2R/ADORA1/ADRB2/TPM1/CCN2/CAV1/CNN1/OXTR/EDN1	23
398	downregulated.Antt vs VC	Downregulated	Antt vs VC	BP	GO:0045446	Endothelial cell differentiation	18/1101	117/18800	0.000153069	0.00202778	0.00153077	ROCK2/NOTCH1/APOLD1/FASN/BMPR2/FSTL1/F2RL1/HOXA13/NR2F2/VCL/ARHGEF26/EZR/ID1/SOX18/S1PR1/ATOH8/NRG1/BMP4	18
399	downregulated.Antt vs VC	Downregulated	Antt vs VC	BP	GO:0090257	Regulation of muscle system process	30/1101	250/18800	0.000153178	0.00202778	0.00153077	KCNMA1/ANXA6/ROCK2/CALM3/CACNA1C/LMCD1/DMD/HCN4/NOTCH1/ATP1B1/SRF/PLCE1/ARHGAP42/SSTR2/SMAD3/LMNA/NKX2-5/TBXA2R/SLC8A1/ATP2B4/F2R/ADORA1/ADRB2/TPM1/CCN2/RGS4/CAV1/CNN1/OXTR/EDN1	30
400	downregulated.Antt vs VC	Downregulated	Antt vs VC	BP	GO:0051099	Positive regulation of binding	23/1101	171/18800	0.000165504	0.00218548	0.00164981	RALB/CALM3/DACT1/HMGB2/ANXA2/ZNF618/TGFB1/HMGB1/ADD2/GMNN/BAMBI/PLXND1/PLCL2/EGF/STMN1/ERCC2/SPON1/S100A10/BDNF/CAV1/LFNG/RIPOR2/BMP4	23
401	downregulated.Antt vs VC	Downregulated	Antt vs VC	BP	GO:0051261	Protein depolymerization	18/1101	118/18800	0.000170916	0.00225132	0.00169952	MICAL2/SWAP70/GSN/MICAL3/KIF18A/SPTAN1/EPS8/MID1/ADD2/TMOD2/WDR1/NAV3/CKAP2/CARMIL2/F2RL1/STMN1/KIF18B/LIMA1	18
402	downregulated.Antt vs VC	Downregulated	Antt vs VC	BP	GO:0070169	Positive regulation of biomineral tissue development	11/1101	52/18800	0.000173463	0.00227352	0.00171628	TGFB1/CCN1/BMPR2/SMAD3/FBXO5/FAM20C/SLC8A1/TGFB3/TENT5A/ADRB2/BMP4	11
403	downregulated.Antt vs VC	Downregulated	Antt vs VC	BP	GO:0090329	Regulation of dna-templated dna replication	11/1101	52/18800	0.000173463	0.00227352	0.00171628	PCNA/TICRR/TIMELESS/BLM/GMNN/FBXO5/GINS1/GINS2/CDC7/E2F8/CDK2	11
404	downregulated.Antt vs VC	Downregulated	Antt vs VC	BP	GO:0045652	Regulation of megakaryocyte differentiation	9/1101	36/18800	0.000175297	0.00229187	0.00173013	HMGB2/H4C12/H4C3/H4C8/PRMT6/H4C11/H4C14/H4C15/H4C2	9
405	downregulated.Antt vs VC	Downregulated	Antt vs VC	BP	GO:0008217	Regulation of blood pressure	24/1101	183/18800	0.000178663	0.00233012	0.001759	TRHDE/EMP2/PLCB3/BMPR2/GAS6/DDAH1/SGK1/ARHGAP42/SMAD3/PDGFB/F2RL1/TBXA2R/APLN/NR2F2/VEGFC/F2R/ADORA1/ADRA1D/ADRB2/NPPB/TPM1/ACTA2/OXTR/EDN1	24
406	downregulated.Antt vs VC	Downregulated	Antt vs VC	BP	GO:0006268	Dna unwinding involved in dna replication	7/1101	22/18800	0.000181516	0.00235409	0.00177709	MCM3/MCM2/BLM/GINS1/GINS2/RAD51/MCM5	7
407	downregulated.Antt vs VC	Downregulated	Antt vs VC	BP	GO:0060445	Branching involved in salivary gland morphogenesis	7/1101	22/18800	0.000181516	0.00235409	0.00177709	PLXNA1/PDGFA/PLXND1/SNAI2/LAMA5/FGFR2/SEMA3C	7
408	downregulated.Antt vs VC	Downregulated	Antt vs VC	BP	GO:0060443	Mammary gland morphogenesis	10/1101	44/18800	0.000181838	0.00235409	0.00177709	CAPN1/PTCH1/TBX2/EPHA2/GLI3/DDR1/MSX2/FGFR2/CAV1/BMP4	10
409	downregulated.Antt vs VC	Downregulated	Antt vs VC	BP	GO:0071774	Response to fibroblast growth factor	18/1101	119/18800	0.000190558	0.00245694	0.00185474	CD44/NDST1/TBX2/HYAL2/FLRT2/RUNX2/LHX1/FAM20C/APLN/FGF5/FGFR2/THBS1/CCN2/FGF1/FGFR3/FGFBP1/CREB3L1/HHIP	18
410	downregulated.Antt vs VC	Downregulated	Antt vs VC	BP	GO:0060841	Venous blood vessel development	6/1101	16/18800	0.000191575	0.00245694	0.00185474	NOTCH1/BMPR2/NKX2-5/EFNB2/SEMA3C/CCBE1	6
411	downregulated.Antt vs VC	Downregulated	Antt vs VC	BP	GO:0061437	Renal system vasculature development	8/1101	29/18800	0.000191643	0.00245694	0.00185474	NOTCH1/NOTCH3/PDGFB/SERPINB7/FOXC2/PDGFRB/ACTA2/BMP4	8
412	downregulated.Antt vs VC	Downregulated	Antt vs VC	BP	GO:0061440	Kidney vasculature development	8/1101	29/18800	0.000191643	0.00245694	0.00185474	NOTCH1/NOTCH3/PDGFB/SERPINB7/FOXC2/PDGFRB/ACTA2/BMP4	8
413	downregulated.Antt vs VC	Downregulated	Antt vs VC	BP	GO:0007127	Meiosis i	19/1101	130/18800	0.000202669	0.00259201	0.0019567	CCNB2/TEX11/RAD54L/RMI1/CENPX/PTTG1/FBXO5/ESPL1/TOP2A/CDC25B/RAD51/SHOC1/FMN2/BRME1/PLK1/RAD54B/BRIP1/MYBL1/CCNE2	19
414	downregulated.Antt vs VC	Downregulated	Antt vs VC	BP	GO:0048644	Muscle organ morphogenesis	14/1101	80/18800	0.000205607	0.00262323	0.00198027	TGFB1/NOTCH1/MYLK/ANKRD1/NKX2-5/FZD2/FOXC2/TGFBR3/ARID5B/FGFR2/TPM1/S1PR1/NRG1/TGFB2	14
415	downregulated.Antt vs VC	Downregulated	Antt vs VC	BP	GO:0110151	Positive regulation of biomineralization	11/1101	53/18800	0.000207449	0.00264035	0.00199319	TGFB1/CCN1/BMPR2/SMAD3/FBXO5/FAM20C/SLC8A1/TGFB3/TENT5A/ADRB2/BMP4	11
416	downregulated.Antt vs VC	Downregulated	Antt vs VC	BP	GO:0042770	Signal transduction in response to dna damage	23/1101	174/18800	0.000214809	0.00272368	0.0020561	CD44/CLSPN/TICRR/MAP3K20/ATAD5/FOXM1/BLM/ANKRD1/GTSE1/FOXN3/DTL/SNAI2/BCL3/CCND1/H2AX/CDK1/PLK1/WDR76/CDK2/E2F1/BRIP1/SOX4/PLK2	23
417	downregulated.Antt vs VC	Downregulated	Antt vs VC	BP	GO:0071902	Positive regulation of protein serine/threonine kinase activity	26/1101	208/18800	0.000215028	0.00272368	0.0020561	RALB/TRAF2/CALM3/AJUBA/TGFB1/PSRC1/PDGFA/CCNB1/FERMT2/EZH2/BMPR2/FZD4/INCENP/PDGFB/EGF/CCND1/PDGFC/CD24/ATP2B4/KITLG/PDGFRB/NTF3/ADRB2/THBS1/FGF1/EDN1	26
418	downregulated.Antt vs VC	Downregulated	Antt vs VC	BP	GO:0050818	Regulation of coagulation	13/1101	71/18800	0.000215545	0.00272371	0.00205612	EPHB2/PDGFA/PDGFB/F2RL1/TBXA2R/ST3GAL4/PLAT/SERPINE1/F2R/THBS1/CAV1/F3/EDN1	13
419	downregulated.Antt vs VC	Downregulated	Antt vs VC	BP	GO:0032508	Dna duplex unwinding	15/1101	90/18800	0.000216702	0.00272528	0.00205731	RAD54L/MCM3/MCM2/BLM/ERCC6L/DNA2/GINS1/TOP2A/PIF1/GINS2/ERCC2/RAD51/MCM5/RAD54B/BRIP1	15
420	downregulated.Antt vs VC	Downregulated	Antt vs VC	BP	GO:0042475	Odontogenesis of dentin-containing tooth	15/1101	90/18800	0.000216702	0.00272528	0.00205731	NF2/TCIRG1/DLX1/GLI3/NECTIN1/RUNX2/ROGDI/GLI2/FAM20C/LAMA5/MSX2/SERPINE1/FST/TNFRSF11B/BMP4	15
421	downregulated.Antt vs VC	Downregulated	Antt vs VC	BP	GO:0090092	Regulation of transmembrane receptor protein serine/threonine kinase signaling pathway	31/1101	267/18800	0.000218129	0.00273671	0.00206594	CDKN2B/GDF11/CRIM1/TGFB1I1/TGFB1/NOTCH1/C20orf27/SMURF2/FOXD1/CCN1/DLX1/BMPR2/CITED2/SMAD3/BAMBI/FSTL1/ZNF703/HOXA13/BMPER/TGFB3/MSX2/TGFBR3/SMAD6/NREP/FST/CAV2/THBS1/INHBA/CAV1/TGFB2/BMP4	31
422	downregulated.Antt vs VC	Downregulated	Antt vs VC	BP	GO:0003176	Aortic valve development	9/1101	37/18800	0.000219715	0.00275008	0.00207603	ROCK2/TGFB1/NOTCH1/SOX9/BMPR2/NKX2-5/SNAI2/SMAD6/BMP4	9
423	downregulated.Antt vs VC	Downregulated	Antt vs VC	BP	GO:0051985	Negative regulation of chromosome segregation	10/1101	45/18800	0.000221654	0.00276126	0.00208447	BUB1B/XRCC3/CCNB1/AURKB/CENPF/PTTG1/FBXO5/SPDL1/ZWINT/PLK1	10
424	downregulated.Antt vs VC	Downregulated	Antt vs VC	BP	GO:1905819	Negative regulation of chromosome separation	10/1101	45/18800	0.000221654	0.00276126	0.00208447	BUB1B/XRCC3/CCNB1/AURKB/CENPF/PTTG1/FBXO5/SPDL1/ZWINT/PLK1	10
425	downregulated.Antt vs VC	Downregulated	Antt vs VC	BP	GO:0035265	Organ growth	23/1101	175/18800	0.000233909	0.00288458	0.00217756	ANXA6/RARG/TBX2/PDLIM5/NOTCH1/SOX9/BNC2/CITED2/BASP1/NKX2-5/FOXC2/SORBS2/MSX2/CDK1/TGFBR3/PDGFRB/WWC1/FGFR2/RGS4/S1PR1/FGFR3/TGFB2/EDN1	23
426	downregulated.Antt vs VC	Downregulated	Antt vs VC	BP	GO:0001765	Membrane raft assembly	5/1101	11/18800	0.000234283	0.00288458	0.00217756	ANXA2/EMP2/S100A10/CAV2/CAV1	5
427	downregulated.Antt vs VC	Downregulated	Antt vs VC	BP	GO:0060174	Limb bud formation	5/1101	11/18800	0.000234283	0.00288458	0.00217756	SOX9/FGFR2/SEMA3C/SOX4/WNT3	5
428	downregulated.Antt vs VC	Downregulated	Antt vs VC	BP	GO:0072697	Protein localization to cell cortex	5/1101	11/18800	0.000234283	0.00288458	0.00217756	EPB41L2/GNAI1/PLK1/EZR/MISP	5
429	downregulated.Antt vs VC	Downregulated	Antt vs VC	BP	GO:0090527	Actin filament reorganization	5/1101	11/18800	0.000234283	0.00288458	0.00217756	GSN/BCAR1/HMCN1/MCU/NEDD9	5
430	downregulated.Antt vs VC	Downregulated	Antt vs VC	BP	GO:0045445	Myoblast differentiation	14/1101	81/18800	0.000235385	0.00288469	0.00217764	MBNL1/SDC1/TGFB1/MAPK12/NOTCH1/SOX9/IGFBP3/PITX1/ID3/PRICKLE1/RBM24/NRG1/RIPOR2/BMP4	14
431	downregulated.Antt vs VC	Downregulated	Antt vs VC	BP	GO:0055013	Cardiac muscle cell development	14/1101	81/18800	0.000235385	0.00288469	0.00217764	FHOD3/PDLIM5/SRF/LMNA/NKX2-5/FHL2/SORBS2/SLC8A1/CDK1/PDGFRB/ALPK2/RGS4/EDN1/BMP4	14
432	downregulated.Antt vs VC	Downregulated	Antt vs VC	BP	GO:0072080	Nephron tubule development	15/1101	91/18800	0.00024566	0.00299779	0.00226302	PTCH1/NOTCH1/SOX9/FOXD1/GLI3/LHX1/IRX3/LAMA5/WNT7B/CD24/SIX2/SALL1/FGF1/LGR4/BMP4	15
433	downregulated.Antt vs VC	Downregulated	Antt vs VC	BP	GO:0021545	Cranial nerve development	11/1101	54/18800	0.000246903	0.00299779	0.00226302	NRP2/EPHB2/ATP8B1/TCIRG1/GLI3/CITED2/KCNA2/PLXNA4/SLC1A3/ACKR3/SALL1	11
434	downregulated.Antt vs VC	Downregulated	Antt vs VC	BP	GO:0045926	Negative regulation of growth	29/1101	245/18800	0.000247697	0.00299779	0.00226302	JADE1/HIF1A/PTCH1/TGFB1/PSRC1/HYAL2/BMPR2/SH3BP4/SOCS2/PLAC8/CCDC85B/CRYAB/CDKN2C/CITED2/SMAD3/SEMA7A/FHL1/PTPRJ/WWC1/ADRB2/SEMA3C/NPPB/RGS4/NKD1/FGFR3/INHBA/WNT3/TGFB2/BMP4	29
435	downregulated.Antt vs VC	Downregulated	Antt vs VC	BP	GO:0051383	Kinetochore organization	7/1101	23/18800	0.00024781	0.00299779	0.00226302	SMC4/CENPE/CENPA/NUF2/DLGAP5/CENPX/CENPF	7
436	downregulated.Antt vs VC	Downregulated	Antt vs VC	BP	GO:0001945	Lymph vessel development	8/1101	30/18800	0.000248019	0.00299779	0.00226302	EPHA2/BMPR2/FOXC2/NR2F2/VEGFC/EFNB2/CCBE1/SOX18	8
437	downregulated.Antt vs VC	Downregulated	Antt vs VC	BP	GO:0061037	Negative regulation of cartilage development	8/1101	30/18800	0.000248019	0.00299779	0.00226302	EFEMP1/RARG/ADAMTS12/SOX9/SNAI2/RFLNB/ZNF664-RFLNA/BMP4	8
438	downregulated.Antt vs VC	Downregulated	Antt vs VC	BP	GO:0003208	Cardiac ventricle morphogenesis	13/1101	72/18800	0.000249146	0.00300455	0.00226813	PPP1R13L/HIF1A/TGFB1/NOTCH1/NKX2-5/FOXC2/TGFBR3/FGFR2/SEMA3C/TPM1/SOX4/NRG1/TGFB2	13
439	downregulated.Antt vs VC	Downregulated	Antt vs VC	BP	GO:0030010	Establishment of cell polarity	20/1101	143/18800	0.000255196	0.00307049	0.0023179	ROCK2/IGF1R/GSN/CENPA/MYH9/TCIRG1/CYTH3/FSCN1/DOCK2/FAT1/AMOTL2/WNT7A/SPDL1/WEE1/PLK1/KANK1/WWC1/ALPK2/MISP/RIPOR2	20
440	downregulated.Antt vs VC	Downregulated	Antt vs VC	BP	GO:0050769	Positive regulation of neurogenesis	27/1101	222/18800	0.000257688	0.00309343	0.00233522	PLXNA1/DBN1/EPHB2/HIF1A/TGFB1/BAIAP2/NIN/ZNF365/NOTCH1/NUMBL/SRF/GLI3/BMPR2/SHANK3/CLCF1/NEFL/PLXND1/ASPM/PLXNA4/DIXDC1/VEGFC/SEMA7A/BDNF/E2F1/TIAM2/WNT3/ZNF488	27
441	downregulated.Antt vs VC	Downregulated	Antt vs VC	BP	GO:0008154	Actin polymerization or depolymerization	25/1101	199/18800	0.00026085	0.00311947	0.00235488	DBN1/MICAL2/KIRREL1/VASP/FHOD3/SWAP70/GSN/MICAL3/SPTAN1/EPS8/ADD2/ENAH/BAIAP2/TMOD2/ARHGAP28/CIT/WDR1/CARMIL2/CDC42EP3/DAAM2/F2RL1/FHDC1/PLEKHG2/KANK1/LIMA1	25
442	downregulated.Antt vs VC	Downregulated	Antt vs VC	BP	GO:0048562	Embryonic organ morphogenesis	33/1101	294/18800	0.000261038	0.00311947	0.00235488	EFEMP1/EPHB2/MICAL2/NDST1/RARG/SUFU/HIF1A/TBX2/EPHA2/NOTCH1/SOX9/SRF/GLI3/RUNX2/CITED2/SMAD3/LHX1/NKX2-5/FZD2/FOXC2/ALX4/TGFB3/LRIG3/FOXF2/SIX2/DLX6/FGFR2/TEAD2/INSIG1/SOX18/DLX5/EDN1/BMP4	33
443	downregulated.Antt vs VC	Downregulated	Antt vs VC	BP	GO:0051271	Negative regulation of cellular component movement	39/1101	369/18800	0.000266311	0.00317529	0.00239702	CORO1C/STARD13/RIN3/ARPIN/ACTN1/FRMD5/TGFB1/HMGB1/MIIP/NF2/HYAL2/LIMCH1/NOTCH1/SRF/RAP2B/CITED2/IGFBP3/NAV3/MITF/CNN2/RHOB/TBXA2R/RECK/NR2F2/ATP2B4/IL24/VCL/SERPINE1/TGFBR3/PHLDB2/KANK1/PTPRJ/ADORA1/THBS1/TPM1/MACIR/NRG1/CARD10/RIPOR2	39
444	downregulated.Antt vs VC	Downregulated	Antt vs VC	BP	GO:0033047	Regulation of mitotic sister chromatid segregation	10/1101	46/18800	0.000268528	0.00318019	0.00240072	BUB1B/XRCC3/CCNB1/AURKB/CENPF/PTTG1/FBXO5/SPDL1/ZWINT/PLK1	10
445	downregulated.Antt vs VC	Downregulated	Antt vs VC	BP	GO:0048701	Embryonic cranial skeleton morphogenesis	10/1101	46/18800	0.000268528	0.00318019	0.00240072	NDST1/GLI3/RUNX2/SMAD3/LHX1/FOXC2/TGFB3/SIX2/FGFR2/BMP4	10
446	downregulated.Antt vs VC	Downregulated	Antt vs VC	BP	GO:0061383	Trabecula morphogenesis	10/1101	46/18800	0.000268528	0.00318019	0.00240072	NOTCH1/SRF/NKX2-5/FHL2/ADGRG6/MSX2/TGFBR3/S1PR1/NRG1/TGFB2	10
447	downregulated.Antt vs VC	Downregulated	Antt vs VC	BP	GO:0010927	Cellular component assembly involved in morphogenesis	17/1101	112/18800	0.000272493	0.00321221	0.00242489	FHOD3/KNL1/PHLDB1/SRF/ANKRD1/TMOD2/WDR1/NKX2-5/ERCC2/PHLDB2/ACTG1/PDGFRB/TPM1/LDB3/SYNPO2L/MYPN/EDN1	17
448	downregulated.Antt vs VC	Downregulated	Antt vs VC	BP	GO:0006270	Dna replication initiation	9/1101	38/18800	0.000273088	0.00321221	0.00242489	TICRR/MCM3/MCM2/GMNN/PRIM1/MCM5/CDK2/MCM10/CCNE2	9
449	downregulated.Antt vs VC	Downregulated	Antt vs VC	BP	GO:0032965	Regulation of collagen biosynthetic process	9/1101	38/18800	0.000273088	0.00321221	0.00242489	VIM/TGFB1/SERPINB7/TGFB3/F2R/PDGFRB/CCN2/CREB3L1/BMP4	9
450	downregulated.Antt vs VC	Downregulated	Antt vs VC	BP	GO:0030048	Actin filament-based movement	19/1101	133/18800	0.000273664	0.00321221	0.00242489	EPDR1/MYO1E/CACNA1C/MYO1B/FNBP1L/GSN/EMP2/MYH9/LIMCH1/HCN4/MYH2/GJC1/ACTN4/FRMD6/ADORA1/TPM1/ACTA2/MYO7B/CAV1	19
451	downregulated.Antt vs VC	Downregulated	Antt vs VC	BP	GO:0016202	Regulation of striated muscle tissue development	6/1101	17/18800	0.000281447	0.00329446	0.00248698	TGFB1/MRTFB/CENPF/SMAD3/JPH2/BMP4	6
452	downregulated.Antt vs VC	Downregulated	Antt vs VC	BP	GO:0007179	Transforming growth factor beta receptor signaling pathway	25/1101	200/18800	0.000281919	0.00329446	0.00248698	CDKN2B/PXN/TGFB1I1/FURIN/TGFB1/LTBP2/C20orf27/FERMT2/SMURF2/ZYX/CITED2/SMAD3/BAMBI/ZNF703/TGFB3/SMAD9/TGFBR3/SMAD6/NREP/ID1/CAV2/THBS1/ITGB8/CAV1/TGFB2	25
453	downregulated.Antt vs VC	Downregulated	Antt vs VC	BP	GO:0060415	Muscle tissue morphogenesis	13/1101	73/18800	0.000287125	0.00334789	0.00252732	TGFB1/NOTCH1/MYLK/ANKRD1/NKX2-5/FZD2/FOXC2/TGFBR3/FGFR2/TPM1/S1PR1/NRG1/TGFB2	13
454	downregulated.Antt vs VC	Downregulated	Antt vs VC	BP	GO:0001704	Formation of primary germ layer	18/1101	123/18800	0.000290226	0.00336917	0.00254338	FZD7/NF2/EPHA2/COL7A1/SRF/BMPR2/ITGA7/SMAD3/LHX1/ETS2/FOXC2/SIX2/COL8A1/FGFR2/INHBA/ATOH8/WNT3/BMP4	18
455	downregulated.Antt vs VC	Downregulated	Antt vs VC	BP	GO:0031570	Dna integrity checkpoint signaling	18/1101	123/18800	0.000290226	0.00336917	0.00254338	CLSPN/TICRR/MAP3K20/TIMELESS/BLM/GTSE1/FOXN3/DTL/DNA2/CCND1/H2AX/CDK1/PLK1/WDR76/CDK2/E2F1/BRIP1/PLK2	18
456	downregulated.Antt vs VC	Downregulated	Antt vs VC	BP	GO:0043588	Skin development	33/1101	296/18800	0.00029558	0.0034238	0.00258462	ROCK2/KRT86/KRT81/SUFU/NSDHL/FOSL2/PDGFA/EPHA2/NOTCH1/SOX9/SRF/DHCR24/KAZN/GLI2/ALX4/STMN1/LAMA5/ERCC2/MSX2/COL5A3/PALLD/SFN/KRT80/CDH11/FGFR2/FST/LHX2/SOX18/INHBA/TNFRSF19/LGR4/TGFB2/LGR5	33
457	downregulated.Antt vs VC	Downregulated	Antt vs VC	BP	GO:1902750	Negative regulation of cell cycle g2/m phase transition	12/1101	64/18800	0.000296736	0.00342967	0.00258905	CLSPN/TICRR/MIIP/ATF5/AURKB/BLM/FOXN3/DTL/NABP1/CDK1/PLK1/FHL1	12
458	downregulated.Antt vs VC	Downregulated	Antt vs VC	BP	GO:0001889	Liver development	19/1101	134/18800	0.000301727	0.00347975	0.00262685	PCNA/CDKN2B/CADM1/PTCH1/NOTCH1/SOX9/EZH2/GLI3/CIT/CITED2/SMAD3/RPS6KA1/CCND1/TYMS/TGFBR3/ARID5B/E2F8/FGF1/PCSK9	19
459	downregulated.Antt vs VC	Downregulated	Antt vs VC	BP	GO:0034508	Centromere complex assembly	8/1101	31/18800	0.00031727	0.00364309	0.00275016	CENPE/CENPA/DLGAP5/CENPX/CENPF/NASP/CENPI/HELLS	8
460	downregulated.Antt vs VC	Downregulated	Antt vs VC	BP	GO:0035115	Embryonic forelimb morphogenesis	8/1101	31/18800	0.00031727	0.00364309	0.00275016	CACNA1C/RUNX2/RECK/HOXA13/ALX4/WNT7A/MSX2/WNT3	8
461	downregulated.Antt vs VC	Downregulated	Antt vs VC	BP	GO:0000082	G1/s transition of mitotic cell cycle	27/1101	225/18800	0.000320261	0.00366151	0.00276407	JADE1/CDKN2B/DACT1/IQGAP3/CTDSPL/RBL1/CDKN3/EZH2/POLE/CDK6/GTSE1/CDKN2C/NASP/SKP2/CDC25A/CCND1/RRM2/KLF11/WEE1/CDC7/FHL1/KANK2/CDK2/E2F1/INHBA/CCNE2/PLK2	27
462	downregulated.Antt vs VC	Downregulated	Antt vs VC	BP	GO:0050920	Regulation of chemotaxis	27/1101	225/18800	0.000320261	0.00366151	0.00276407	SWAP70/RIN3/TGFB1/HMGB1/MCU/NOTCH1/BMPR2/GAS6/SMAD3/HSPB1/PDGFB/F2RL1/PLXNA4/VEGFC/SERPINE1/SEMA7A/EFNB2/PDGFRB/NTF3/SEMA3C/THBS1/FGF1/S1PR1/WNT3/F3/RIPOR2/EDN1	27
463	downregulated.Antt vs VC	Downregulated	Antt vs VC	BP	GO:0001838	Embryonic epithelial tube formation	18/1101	124/18800	0.000321293	0.00366538	0.00276699	VASP/RARG/SUFU/HIF1A/PTCH1/TGFB1/SOX9/LUZP1/CITED2/IRX3/FZD2/PRICKLE1/SHROOM3/TEAD2/LHX2/SOX4/TGFB2/BMP4	18
464	downregulated.Antt vs VC	Downregulated	Antt vs VC	BP	GO:0003197	Endocardial cushion development	10/1101	47/18800	0.000323415	0.00367371	0.00277328	TBX2/NOTCH1/SOX9/BMPR2/CITED2/SNAI2/MSX2/RBM24/TGFB2/BMP4	10
465	downregulated.Antt vs VC	Downregulated	Antt vs VC	BP	GO:0032964	Collagen biosynthetic process	10/1101	47/18800	0.000323415	0.00367371	0.00277328	VIM/TGFB1/TRAM2/SERPINB7/TGFB3/F2R/PDGFRB/CCN2/CREB3L1/BMP4	10
466	downregulated.Antt vs VC	Downregulated	Antt vs VC	BP	GO:0032886	Regulation of microtubule-based process	29/1101	249/18800	0.000325816	0.00368858	0.0027845	ROCK2/KAT2B/TACC3/KIF18A/SPAG5/PSRC1/KLHL42/MID1/XRCC3/PHLDB1/ATF5/NEFH/NIN/SKA2/FKBP4/PLK4/NAV3/CKAP2/GNAI1/TRIM58/DIXDC1/STMN1/PHLDB2/PLK1/GAS2L1/CCNF/ODAD2/C10orf90/PLK2	29
467	downregulated.Antt vs VC	Downregulated	Antt vs VC	BP	GO:0030324	Lung development	23/1101	179/18800	0.00032612	0.00368858	0.0027845	TIMELESS/PDGFA/TBX2/NOTCH1/SOX9/SRF/GLI3/BMPR2/THRA/HS6ST1/GLI2/LAMA5/TGFB3/CRISPLD2/WNT7B/NFIB/PDGFRB/FGFR2/CCBE1/CCN2/FGF1/HHIP/BMP4	23
468	downregulated.Antt vs VC	Downregulated	Antt vs VC	BP	GO:0001779	Natural killer cell differentiation	7/1101	24/18800	0.000332276	0.00375018	0.002831	TYRO3/AXL/STAT5B/GAS6/PIK3CD/TOX/PRDM1	7
469	downregulated.Antt vs VC	Downregulated	Antt vs VC	BP	GO:0032570	Response to progesterone	9/1101	39/18800	0.00033676	0.00379267	0.00286308	IGF1R/TGFB1/TGFB3/TYMS/TRERF1/THBS1/CAV1/TGFB2/OXTR	9
470	downregulated.Antt vs VC	Downregulated	Antt vs VC	BP	GO:0006940	Regulation of smooth muscle contraction	12/1101	65/18800	0.000344813	0.00386907	0.00292075	KCNMA1/SRF/PLCE1/ARHGAP42/TBXA2R/F2R/ADORA1/ADRB2/CAV1/CNN1/OXTR/EDN1	12
471	downregulated.Antt vs VC	Downregulated	Antt vs VC	BP	GO:0003229	Ventricular cardiac muscle tissue development	11/1101	56/18800	0.000345008	0.00386907	0.00292075	PPP1R13L/TGFB1/NOTCH1/NKX2-5/IRX3/FOXC2/TGFBR3/FGFR2/TPM1/NRG1/TGFB2	11
472	downregulated.Antt vs VC	Downregulated	Antt vs VC	BP	GO:0001841	Neural tube formation	16/1101	104/18800	0.000349137	0.00390707	0.00294944	VASP/RARG/SUFU/HIF1A/PTCH1/TGFB1/LUZP1/CITED2/FZD2/PRICKLE1/SHROOM3/TEAD2/LHX2/SOX4/TGFB2/BMP4	16
473	downregulated.Antt vs VC	Downregulated	Antt vs VC	BP	GO:1901652	Response to peptide	48/1101	491/18800	0.000352124	0.00393217	0.00296839	RANGAP1/NUCKS1/SIK2/VIM/PKM/EPHB2/LPIN1/PXN/ROCK2/SOGA1/KAT2B/IGF1R/STAT5B/BCAR1/RAB15/ERFE/TIMELESS/TNS2/RAB31/BAIAP2/NOTCH1/SOCS3/SOCS2/SESN3/PNPLA3/NEFL/GNAI1/FOXC2/GCNT1/BCAR3/PLAT/CCNA2/KLF11/TGFBR3/PIK3R3/KANK1/ID1/ADRB2/INSIG1/BRIP1/IRS1/CAV2/INAVA/CCN2/CAV1/PCSK9/OXTR/EDN1	48
474	downregulated.Antt vs VC	Downregulated	Antt vs VC	BP	GO:0008064	Regulation of actin polymerization or depolymerization	21/1101	158/18800	0.000368156	0.00410254	0.00309699	DBN1/KIRREL1/VASP/FHOD3/SWAP70/GSN/SPTAN1/EPS8/ADD2/BAIAP2/TMOD2/ARHGAP28/CIT/WDR1/CARMIL2/CDC42EP3/DAAM2/F2RL1/PLEKHG2/KANK1/LIMA1	21
475	downregulated.Antt vs VC	Downregulated	Antt vs VC	BP	GO:0003018	Vascular process in circulatory system	30/1101	263/18800	0.000370744	0.00412268	0.0031122	KCNMA1/ROCK2/TGFB1/SLC4A8/SLC5A3/FERMT2/AKAP12/BMPR2/DDAH1/KCNMB1/ARHGAP42/SLC24A3/SLC29A1/FOXC2/F2RL1/TBXA2R/SLC1A3/SLC8A1/ATP2B4/SLC7A2/F2R/PTPRJ/ADORA1/ADRA1D/ADRB2/NPPB/ACTA2/CAV1/OXTR/EDN1	30
476	downregulated.Antt vs VC	Downregulated	Antt vs VC	BP	GO:0000727	Double-strand break repair via break-induced replication	5/1101	12/18800	0.000382282	0.00421548	0.00318225	MCM3/MCM2/GINS2/MCM5/CDC7	5
477	downregulated.Antt vs VC	Downregulated	Antt vs VC	BP	GO:0032823	Regulation of natural killer cell differentiation	5/1101	12/18800	0.000382282	0.00421548	0.00318225	AXL/STAT5B/GAS6/TOX/PRDM1	5
478	downregulated.Antt vs VC	Downregulated	Antt vs VC	BP	GO:0097531	Mast cell migration	5/1101	12/18800	0.000382282	0.00421548	0.00318225	SWAP70/STAT5B/RIN3/PIK3CD/VEGFC	5
479	downregulated.Antt vs VC	Downregulated	Antt vs VC	BP	GO:0099188	Postsynaptic cytoskeleton organization	5/1101	12/18800	0.000382282	0.00421548	0.00318225	DBN1/NEFH/NEFL/ACTB/ACTG1	5
480	downregulated.Antt vs VC	Downregulated	Antt vs VC	BP	GO:0045839	Negative regulation of mitotic nuclear division	10/1101	48/18800	0.000387351	0.00425361	0.00321104	BUB1B/XRCC3/CCNB1/AURKB/CENPF/FBXO5/SPDL1/ZWINT/PLK1/BMP4	10
481	downregulated.Antt vs VC	Downregulated	Antt vs VC	BP	GO:0048146	Positive regulation of fibroblast proliferation	10/1101	48/18800	0.000387351	0.00425361	0.00321104	FOSL2/PDGFA/CCNB1/GAS6/CDK6/PDGFB/PDGFC/CCNA2/PDGFRB/E2F1	10
482	downregulated.Antt vs VC	Downregulated	Antt vs VC	BP	GO:0010812	Negative regulation of cell-substrate adhesion	12/1101	66/18800	0.00039932	0.00432812	0.00326729	CORO1C/AJAP1/FZD7/NF2/NOTCH1/FZD4/ACTN4/SERPINE1/PHLDB2/KANK1/THBS1/GBP1	12
483	downregulated.Antt vs VC	Downregulated	Antt vs VC	BP	GO:0030832	Regulation of actin filament length	21/1101	159/18800	0.000401291	0.00432812	0.00326729	DBN1/KIRREL1/VASP/FHOD3/SWAP70/GSN/SPTAN1/EPS8/ADD2/BAIAP2/TMOD2/ARHGAP28/CIT/WDR1/CARMIL2/CDC42EP3/DAAM2/F2RL1/PLEKHG2/KANK1/LIMA1	21
484	downregulated.Antt vs VC	Downregulated	Antt vs VC	BP	GO:0001946	Lymphangiogenesis	6/1101	18/18800	0.000401344	0.00432812	0.00326729	EPHA2/BMPR2/FOXC2/VEGFC/CCBE1/SOX18	6
485	downregulated.Antt vs VC	Downregulated	Antt vs VC	BP	GO:0032354	Response to follicle-stimulating hormone	6/1101	18/18800	0.000401344	0.00432812	0.00326729	PAPPA/NOTCH1/PLAT/TGFBR3/INHBA/EDN1	6
486	downregulated.Antt vs VC	Downregulated	Antt vs VC	BP	GO:0097094	Craniofacial suture morphogenesis	6/1101	18/18800	0.000401344	0.00432812	0.00326729	GLI3/FOXN3/TGFB3/MSX2/INSIG1/BMP4	6
487	downregulated.Antt vs VC	Downregulated	Antt vs VC	BP	GO:0061008	Hepaticobiliary system development	19/1101	137/18800	0.0004015	0.00432812	0.00326729	PCNA/CDKN2B/CADM1/PTCH1/NOTCH1/SOX9/EZH2/GLI3/CIT/CITED2/SMAD3/RPS6KA1/CCND1/TYMS/TGFBR3/ARID5B/E2F8/FGF1/PCSK9	19
488	downregulated.Antt vs VC	Downregulated	Antt vs VC	BP	GO:0002063	Chondrocyte development	8/1101	32/18800	0.000401511	0.00432812	0.00326729	RARG/SOX9/BMPR2/RUNX2/MSX2/AXIN2/RFLNB/ZNF664-RFLNA	8
489	downregulated.Antt vs VC	Downregulated	Antt vs VC	BP	GO:0003180	Aortic valve morphogenesis	8/1101	32/18800	0.000401511	0.00432812	0.00326729	ROCK2/TGFB1/NOTCH1/SOX9/NKX2-5/SNAI2/SMAD6/BMP4	8
490	downregulated.Antt vs VC	Downregulated	Antt vs VC	BP	GO:0010644	Cell communication by electrical coupling	8/1101	32/18800	0.000401511	0.00432812	0.00326729	DBN1/CALM3/CACNA1C/ATP1B1/GJC1/IRX3/SLC8A1/CAV1	8
491	downregulated.Antt vs VC	Downregulated	Antt vs VC	BP	GO:0001658	Branching involved in ureteric bud morphogenesis	11/1101	57/18800	0.000405204	0.00435903	0.00329062	PTCH1/SOX9/FOXD1/GLI3/LHX1/LAMA5/SIX2/SALL1/FGF1/LGR4/BMP4	11
492	downregulated.Antt vs VC	Downregulated	Antt vs VC	BP	GO:0045841	Negative regulation of mitotic metaphase/anaphase transition	9/1101	40/18800	0.0004122	0.00441631	0.00333386	BUB1B/XRCC3/CCNB1/AURKB/CENPF/FBXO5/SPDL1/ZWINT/PLK1	9
493	downregulated.Antt vs VC	Downregulated	Antt vs VC	BP	GO:0072210	Metanephric nephron development	9/1101	40/18800	0.0004122	0.00441631	0.00333386	SOX9/FOXD1/LHX1/PDGFB/PDGFRB/SIX2/SALL1/LGR4/BMP4	9
494	downregulated.Antt vs VC	Downregulated	Antt vs VC	BP	GO:0031579	Membrane raft organization	7/1101	25/18800	0.000438337	0.00465854	0.00351672	ANXA2/GSN/EMP2/DOCK2/S100A10/CAV2/CAV1	7
495	downregulated.Antt vs VC	Downregulated	Antt vs VC	BP	GO:0051307	Meiotic chromosome separation	7/1101	25/18800	0.000438337	0.00465854	0.00351672	TEX11/NCAPH/RMI1/CENPX/ESPL1/TOP2A/SHOC1	7
496	downregulated.Antt vs VC	Downregulated	Antt vs VC	BP	GO:0072273	Metanephric nephron morphogenesis	7/1101	25/18800	0.000438337	0.00465854	0.00351672	SOX9/LHX1/PDGFRB/SIX2/SALL1/LGR4/BMP4	7
497	downregulated.Antt vs VC	Downregulated	Antt vs VC	BP	GO:0086064	Cell communication by electrical coupling involved in cardiac conduction	7/1101	25/18800	0.000438337	0.00465854	0.00351672	CALM3/CACNA1C/ATP1B1/GJC1/IRX3/SLC8A1/CAV1	7
498	downregulated.Antt vs VC	Downregulated	Antt vs VC	BP	GO:0007043	Cell-cell junction assembly	20/1101	149/18800	0.000441677	0.00468461	0.0035364	EPHB2/ROCK2/ECT2/EPHA2/SRF/FSCN1/GJC1/WDR1/CDH24/ACTB/IRX3/SNAI2/ZNF703/VCL/ACTG1/CNTNAP2/PKP3/CDH11/CTNND2/CAV1	20
499	downregulated.Antt vs VC	Downregulated	Antt vs VC	BP	GO:0014020	Primary neural tube formation	15/1101	96/18800	0.000445942	0.00470501	0.0035518	VASP/RARG/SUFU/HIF1A/PTCH1/TGFB1/LUZP1/CITED2/FZD2/PRICKLE1/SHROOM3/TEAD2/LHX2/TGFB2/BMP4	15
500	downregulated.Antt vs VC	Downregulated	Antt vs VC	BP	GO:0060419	Heart growth	15/1101	96/18800	0.000445942	0.00470501	0.0035518	TBX2/PDLIM5/NOTCH1/CITED2/BASP1/NKX2-5/FOXC2/SORBS2/CDK1/TGFBR3/FGFR2/RGS4/S1PR1/TGFB2/EDN1	15
501	downregulated.Antt vs VC	Downregulated	Antt vs VC	BP	GO:2000134	Negative regulation of g1/s transition of mitotic cell cycle	14/1101	86/18800	0.000446273	0.00470501	0.0035518	JADE1/CDKN2B/DACT1/CTDSPL/RBL1/EZH2/GTSE1/CCND1/WEE1/FHL1/KANK2/CDK2/INHBA/PLK2	14
502	downregulated.Antt vs VC	Downregulated	Antt vs VC	BP	GO:0030323	Respiratory tube development	23/1101	183/18800	0.000448836	0.00472262	0.00356509	TIMELESS/PDGFA/TBX2/NOTCH1/SOX9/SRF/GLI3/BMPR2/THRA/HS6ST1/GLI2/LAMA5/TGFB3/CRISPLD2/WNT7B/NFIB/PDGFRB/FGFR2/CCBE1/CCN2/FGF1/HHIP/BMP4	23
503	downregulated.Antt vs VC	Downregulated	Antt vs VC	BP	GO:0030850	Prostate gland development	10/1101	49/18800	0.000461464	0.00483621	0.00365084	RARG/PTCH1/NOTCH1/SOX9/GLI3/FKBP4/HOXA13/NKX3-1/FGFR2/BMP4	10
504	downregulated.Antt vs VC	Downregulated	Antt vs VC	BP	GO:0048546	Digestive tract morphogenesis	10/1101	49/18800	0.000461464	0.00483621	0.00365084	DACT1/HIF1A/NOTCH1/GLI3/SMAD3/GLI2/HOXA13/SIX2/FGFR2/BMP4	10
505	downregulated.Antt vs VC	Downregulated	Antt vs VC	BP	GO:0043583	Ear development	26/1101	219/18800	0.000483498	0.0050571	0.00381759	EPHB2/MCM2/PDGFA/ATP8B1/TBX2/NOTCH1/SOX9/GLI3/DDR1/SHROOM2/FZD2/HOXA13/BMPER/TGFB3/LRIG3/CCNA2/PDGFRB/SIX2/DLX6/FGFR2/INSIG1/TGFB2/DLX5/LGR5/EDN1/BMP4	26
506	downregulated.Antt vs VC	Downregulated	Antt vs VC	BP	GO:0050772	Positive regulation of axonogenesis	13/1101	77/18800	0.000492385	0.00512974	0.00387243	PLXNA1/DBN1/NIN/SRF/BMPR2/NEFL/PLXND1/PLXNA4/DIXDC1/SEMA7A/BDNF/TIAM2/WNT3	13
507	downregulated.Antt vs VC	Downregulated	Antt vs VC	BP	GO:0072028	Nephron morphogenesis	13/1101	77/18800	0.000492385	0.00512974	0.00387243	PTCH1/SOX9/FOXD1/GLI3/LHX1/IRX3/LAMA5/PDGFRB/SIX2/SALL1/FGF1/LGR4/BMP4	13
508	downregulated.Antt vs VC	Downregulated	Antt vs VC	BP	GO:1902807	Negative regulation of cell cycle g1/s phase transition	15/1101	97/18800	0.000499491	0.00516622	0.00389996	JADE1/CDKN2B/DACT1/CTDSPL/RBL1/EZH2/GTSE1/CCND1/WEE1/FHL1/NKX3-1/KANK2/CDK2/INHBA/PLK2	15
509	downregulated.Antt vs VC	Downregulated	Antt vs VC	BP	GO:0031297	Replication fork processing	9/1101	41/18800	0.000501011	0.00516622	0.00389996	NUCKS1/PCNA/CENPX/MMS22L/ZNF365/BLM/DNA2/TONSL/RAD51	9
510	downregulated.Antt vs VC	Downregulated	Antt vs VC	BP	GO:0007143	Female meiotic nuclear division	8/1101	33/18800	0.000503059	0.00516622	0.00389996	CCNB2/NCAPH/FBXO5/TOP2A/CDC25B/FMN2/BRME1/PLK1	8
511	downregulated.Antt vs VC	Downregulated	Antt vs VC	BP	GO:0098801	Regulation of renal system process	8/1101	33/18800	0.000503059	0.00516622	0.00389996	EMP2/GAS6/PDGFB/F2RL1/F2R/ADORA1/NPPB/EDN1	8
512	downregulated.Antt vs VC	Downregulated	Antt vs VC	BP	GO:0001892	Embryonic placenta development	14/1101	87/18800	0.000503709	0.00516622	0.00389996	HIF1A/NSDHL/SOCS3/CCN1/PLCD3/PLK4/CITED2/HS6ST1/PDGFB/WNT7B/NR2F2/E2F8/FGFR2/PRDM1	14
513	downregulated.Antt vs VC	Downregulated	Antt vs VC	BP	GO:0002088	Lens development in camera-type eye	14/1101	87/18800	0.000503709	0.00516622	0.00389996	VIM/NF2/EPHA2/NECTIN1/CRYAB/CITED2/FAT1/SMAD3/SHROOM2/BCAR3/WNT7A/WNT7B/WNT5B/BMP4	14
514	downregulated.Antt vs VC	Downregulated	Antt vs VC	BP	GO:0055017	Cardiac muscle tissue growth	14/1101	87/18800	0.000503709	0.00516622	0.00389996	TBX2/PDLIM5/NOTCH1/CITED2/NKX2-5/FOXC2/SORBS2/CDK1/TGFBR3/FGFR2/RGS4/S1PR1/TGFB2/EDN1	14
515	downregulated.Antt vs VC	Downregulated	Antt vs VC	BP	GO:0045785	Positive regulation of cell adhesion	44/1101	446/18800	0.000503711	0.00516622	0.00389996	CD44/COL16A1/CBFB/RIN2/ITPKB/STAT5B/EMP2/FRMD5/HMGB1/CYTH3/PIEZO1/PLEKHA2/PODXL/FERMT2/CCN1/MALT1/GLI3/TNFSF9/CDK6/CD274/CITED2/SMAD3/PDGFB/GLI2/FOXC2/NEDD9/ICOSLG/ST3GAL4/SIRPB1/CD24/EFNB2/S100A10/SIRPA/CCDC80/PTPRJ/CD70/PLPP3/COL8A1/TPM1/ADAM19/CAV1/SOX4/IL7R/TGFB2	44
516	downregulated.Antt vs VC	Downregulated	Antt vs VC	BP	GO:0070374	Positive regulation of erk1 and erk2 cascade	26/1101	220/18800	0.000518511	0.00530771	0.00400677	CD44/TGFB1/HMGB1/PDGFA/NOTCH1/FERMT2/AKAP12/DENND2B/GAS6/PDGFB/F2RL1/BMPER/PDGFC/SEMA7A/ACKR3/F2R/PDGFRB/ADCYAP1/GLIPR2/FGFR2/ACTA2/CCN2/FGF1/FGFR3/NRG1/BMP4	26
517	downregulated.Antt vs VC	Downregulated	Antt vs VC	BP	GO:0050921	Positive regulation of chemotaxis	19/1101	140/18800	0.000528749	0.00540203	0.00407798	SWAP70/TGFB1/HMGB1/MCU/BMPR2/GAS6/SMAD3/HSPB1/PDGFB/F2RL1/VEGFC/SERPINE1/PDGFRB/NTF3/THBS1/S1PR1/F3/RIPOR2/EDN1	19
518	downregulated.Antt vs VC	Downregulated	Antt vs VC	BP	GO:0034332	Adherens junction organization	10/1101	50/18800	0.000546969	0.0055774	0.00421036	FERMT2/NUMBL/CDH24/ACTB/PLEKHA7/ZNF703/VCL/EFNB2/CDH11/INAVA	10
519	downregulated.Antt vs VC	Downregulated	Antt vs VC	BP	GO:0001755	Neural crest cell migration	11/1101	59/18800	0.000552211	0.00560919	0.00423436	ANXA6/NRP2/CORO1C/HIF1A/LAMA5/PITX2/SEMA7A/KITLG/SEMA3C/EDN1/BMP4	11
520	downregulated.Antt vs VC	Downregulated	Antt vs VC	BP	GO:0035825	Homologous recombination	11/1101	59/18800	0.000552211	0.00560919	0.00423436	NUCKS1/TEX11/RAD54L/RMI1/CENPX/TOP2A/RAD51/SHOC1/BRME1/RAD54B/BRIP1	11
521	downregulated.Antt vs VC	Downregulated	Antt vs VC	BP	GO:0030011	Maintenance of cell polarity	6/1101	19/18800	0.000557676	0.00563221	0.00425174	DST/PDLIM1/WDR1/CARMIL2/ANK1/LHX2	6
522	downregulated.Antt vs VC	Downregulated	Antt vs VC	BP	GO:0061298	Retina vasculature development in camera-type eye	6/1101	19/18800	0.000557676	0.00563221	0.00425174	HIF1A/BMPR2/FZD4/COL4A1/PDGFRB/RHOJ	6
523	downregulated.Antt vs VC	Downregulated	Antt vs VC	BP	GO:1902894	Negative regulation of mirna transcription	6/1101	19/18800	0.000557676	0.00563221	0.00425174	TGFB1/SOX9/SRF/PDGFB/NFIB/BMP4	6
524	downregulated.Antt vs VC	Downregulated	Antt vs VC	BP	GO:0033077	T cell differentiation in thymus	13/1101	78/18800	0.000559733	0.00563872	0.00425666	ITPKB/STAT5B/FZD7/SRF/GLI3/CDK6/DOCK2/TMEM131L/GLI2/CAMK4/TOX/IL7R/BMP4	13
525	downregulated.Antt vs VC	Downregulated	Antt vs VC	BP	GO:0040013	Negative regulation of locomotion	40/1101	396/18800	0.000560456	0.00563872	0.00425666	CORO1C/STARD13/RIN3/ARPIN/FRMD5/TGFB1/HMGB1/MIIP/NF2/HYAL2/LIMCH1/NOTCH1/SRF/RAP2B/CITED2/IGFBP3/NAV3/MITF/CNN2/RHOB/TBXA2R/RECK/NR2F2/ATP2B4/IL24/VCL/SERPINE1/SEMA7A/PHLDB2/KANK1/PTPRJ/ADORA1/SEMA3C/THBS1/TPM1/MACIR/WNT3/NRG1/CARD10/RIPOR2	40
526	downregulated.Antt vs VC	Downregulated	Antt vs VC	BP	GO:0051897	Positive regulation of protein kinase b signaling	17/1101	119/18800	0.000562581	0.00564934	0.00426467	AXL/IGF1R/TGFB1/PDGFA/HBEGF/FERMT2/GAS6/PIK3CD/EGF/HIP1/RASD2/MYORG/PTPRJ/THBS1/NRG1/LIN28A/F3	17
527	downregulated.Antt vs VC	Downregulated	Antt vs VC	BP	GO:0048872	Homeostasis of number of cells	31/1101	282/18800	0.00056512	0.00566407	0.00427579	NCAPG2/AXL/CCNB2/ITPKB/HMGB2/STAT5B/ILDR2/HIF1A/HMGB1/FAS/TCIRG1/NOTCH1/SOX9/SRF/EZH2/THRA/CDK6/DOCK10/CITED2/PIK3CD/TRIM58/FSTL1/ERCC2/TGFBR3/F2R/KITLG/INHBA/SOX4/IL7R/LGR4/BMP4	31
528	downregulated.Antt vs VC	Downregulated	Antt vs VC	BP	GO:0021952	Central nervous system projection neuron axonogenesis	7/1101	26/18800	0.000569758	0.00567823	0.00428648	EPHB2/NIN/GLI2/PLXNA4/EPHB6/NFIB/CDH11	7
529	downregulated.Antt vs VC	Downregulated	Antt vs VC	BP	GO:0060561	Apoptotic process involved in morphogenesis	7/1101	26/18800	0.000569758	0.00567823	0.00428648	PPP2R1B/NOTCH1/CCN1/CRYAB/NKX2-5/FOXC2/TGFB2	7
530	downregulated.Antt vs VC	Downregulated	Antt vs VC	BP	GO:0060740	Prostate gland epithelium morphogenesis	7/1101	26/18800	0.000569758	0.00567823	0.00428648	RARG/NOTCH1/SOX9/HOXA13/NKX3-1/FGFR2/BMP4	7
531	downregulated.Antt vs VC	Downregulated	Antt vs VC	BP	GO:0046328	Regulation of jnk cascade	19/1101	141/18800	0.000578281	0.00575232	0.00434241	TRAF2/GADD45B/DACT1/IGF1R/PHLPP1/MAPKBP1/HMGB1/FZD7/MECOM/MDFIC/MAGI3/F2RL1/DIXDC1/WNT7A/WNT7B/SIRPA/SH3RF2/CCN2/TNFRSF19	19
532	downregulated.Antt vs VC	Downregulated	Antt vs VC	BP	GO:1903706	Regulation of hemopoiesis	38/1101	371/18800	0.000584455	0.0058028	0.00438052	AXL/MEIS2/CBFB/ITPKB/HMGB2/STAT5B/RARG/HIF1A/TGFB1/H4C12/HMGB1/FANCA/H4C3/H4C8/MALT1/GLI3/GAS6/PRMT6/TNFSF9/CDK6/H4C11/KLF10/TMEM131L/H4C14/HMGB3/MITF/H4C15/GLI2/H4C2/CAMK4/TOX/KITLG/INHBA/PRDM1/SOX4/LRRC17/IL7R/BMP4	38
533	downregulated.Antt vs VC	Downregulated	Antt vs VC	BP	GO:0007254	Jnk cascade	22/1101	175/18800	0.000589177	0.00583871	0.00440763	HACD3/MAP3K20/TRAF2/GADD45B/DACT1/IGF1R/PHLPP1/MAPKBP1/HMGB1/FZD7/MECOM/MDFIC/SMAD3/MAGI3/F2RL1/DIXDC1/WNT7A/WNT7B/SIRPA/SH3RF2/CCN2/TNFRSF19	22
534	downregulated.Antt vs VC	Downregulated	Antt vs VC	BP	GO:0030336	Negative regulation of cell migration	36/1101	346/18800	0.000603645	0.00597089	0.00450741	CORO1C/STARD13/RIN3/ARPIN/TGFB1/HMGB1/MIIP/NF2/HYAL2/LIMCH1/NOTCH1/SRF/RAP2B/CITED2/IGFBP3/NAV3/MITF/CNN2/RHOB/TBXA2R/RECK/NR2F2/ATP2B4/IL24/VCL/SERPINE1/PHLDB2/KANK1/PTPRJ/ADORA1/THBS1/TPM1/MACIR/NRG1/CARD10/RIPOR2	36
535	downregulated.Antt vs VC	Downregulated	Antt vs VC	BP	GO:1902100	Negative regulation of metaphase/anaphase transition of cell cycle	9/1101	42/18800	0.000604929	0.0059724	0.00450855	BUB1B/XRCC3/CCNB1/AURKB/CENPF/FBXO5/SPDL1/ZWINT/PLK1	9
536	downregulated.Antt vs VC	Downregulated	Antt vs VC	BP	GO:0090100	Positive regulation of transmembrane receptor protein serine/threonine kinase signaling pathway	17/1101	120/18800	0.00062042	0.00611392	0.00461538	CDKN2B/GDF11/TGFB1I1/TGFB1/NOTCH1/C20orf27/FOXD1/CCN1/BMPR2/CITED2/TGFB3/MSX2/TGFBR3/THBS1/INHBA/TGFB2/BMP4	17
537	downregulated.Antt vs VC	Downregulated	Antt vs VC	BP	GO:2001251	Negative regulation of chromosome organization	14/1101	89/18800	0.000637606	0.00627157	0.00473439	BUB1B/MCM2/XRCC3/CCNB1/AURKB/CENPF/PTTG1/FBXO5/ESPL1/TOP2A/PIF1/SPDL1/ZWINT/PLK1	14
538	downregulated.Antt vs VC	Downregulated	Antt vs VC	BP	GO:0055008	Cardiac muscle tissue morphogenesis	11/1101	60/18800	0.000640951	0.00629276	0.00475039	TGFB1/NOTCH1/ANKRD1/NKX2-5/FOXC2/TGFBR3/FGFR2/TPM1/S1PR1/NRG1/TGFB2	11
539	downregulated.Antt vs VC	Downregulated	Antt vs VC	BP	GO:2000146	Negative regulation of cell motility	37/1101	361/18800	0.00067736	0.00663232	0.00500672	CORO1C/STARD13/RIN3/ARPIN/FRMD5/TGFB1/HMGB1/MIIP/NF2/HYAL2/LIMCH1/NOTCH1/SRF/RAP2B/CITED2/IGFBP3/NAV3/MITF/CNN2/RHOB/TBXA2R/RECK/NR2F2/ATP2B4/IL24/VCL/SERPINE1/PHLDB2/KANK1/PTPRJ/ADORA1/THBS1/TPM1/MACIR/NRG1/CARD10/RIPOR2	37
540	downregulated.Antt vs VC	Downregulated	Antt vs VC	BP	GO:0048592	Eye morphogenesis	20/1101	154/18800	0.000678224	0.00663232	0.00500672	EFEMP1/EPHB2/GDF11/RARG/HIF1A/TBX2/EPHA2/SOX9/GLI3/NECTIN1/CITED2/FAT1/LHX1/SHROOM2/BCAR3/PITX2/FOXF2/COL8A1/PRDM1/BMP4	20
541	downregulated.Antt vs VC	Downregulated	Antt vs VC	BP	GO:0033044	Regulation of chromosome organization	25/1101	212/18800	0.000679304	0.00663232	0.00500672	ATF7IP/NEK6/SMC4/BUB1B/MCM2/TACC3/CENPE/NCAPH/DLGAP5/NEK2/XRCC3/CCNB1/AURKB/CENPF/UBE2C/PTTG1/FBXO5/ESPL1/TOP2A/PIF1/SPDL1/AXIN2/ZWINT/PLK1/CDK2	25
542	downregulated.Antt vs VC	Downregulated	Antt vs VC	BP	GO:0051225	Spindle assembly	17/1101	121/18800	0.000683285	0.00665887	0.00502677	NEK6/CCNB2/KIF23/TUBB/SPAG5/KIF4A/NEK2/AURKB/KIFC1/INCENP/CDC20/FBXO5/STARD9/MYBL2/ASPM/PLK1/MISP	17
543	downregulated.Antt vs VC	Downregulated	Antt vs VC	BP	GO:0061351	Neural precursor cell proliferation	19/1101	143/18800	0.00068947	0.00669458	0.00505372	DBN1/MELK/HIF1A/NF2/ATF5/NOTCH1/NUMBL/GLI3/LHX1/EGF/ASPM/DIXDC1/TOX/WNT7A/VEGFC/TRNP1/FGFR2/LHX2/HHIP	19
544	downregulated.Antt vs VC	Downregulated	Antt vs VC	BP	GO:0007498	Mesoderm development	18/1101	132/18800	0.000691905	0.00669458	0.00505372	GDF11/NF2/EPHA2/SRF/BMPR2/CITED2/SMAD3/LHX1/ETS2/IRX3/FOXC2/SIX2/FGFR2/TEAD2/LHX2/INHBA/WNT3/BMP4	18
545	downregulated.Antt vs VC	Downregulated	Antt vs VC	BP	GO:1900180	Regulation of protein localization to nucleus	18/1101	132/18800	0.000691905	0.00669458	0.00505372	SUFU/ECT2/SUMO3/TGFB1/NF2/HYAL2/FERMT2/GLI3/MDFIC/SMAD3/LMNA/LIMK2/GLUL/CDK1/PLK1/DCLK2/CARD10/BMP4	18
546	downregulated.Antt vs VC	Downregulated	Antt vs VC	BP	GO:0006302	Double-strand break repair	30/1101	273/18800	0.000692018	0.00669458	0.00505372	DEK/NUCKS1/NSD2/HMGB2/RAD54L/MCM3/MCM2/RMI1/HDGFL2/ESCO2/TIMELESS/HMGB1/XRCC3/MMS22L/FOXM1/ZNF365/BLM/NABP1/ACTB/DNA2/TONSL/GINS2/RAD51/H2AX/MCM5/FMN2/BRME1/CDC7/RAD54B/BRIP1	30
547	downregulated.Antt vs VC	Downregulated	Antt vs VC	BP	GO:0045936	Negative regulation of phosphate metabolic process	43/1101	440/18800	0.000703926	0.00679732	0.00513128	NCAPG2/EPHB2/LPIN1/CDKN2B/HMGCR/ROCK2/KIRREL1/CALM3/GADD45B/AJUBA/CORO1C/KAT2B/SWAP70/PRR5L/TGFB1/PDGFA/CTDSPL/NF2/HYAL2/DMD/SOCS3/PRKAR2B/CDKN2C/IGFBP3/DBNDD1/HSPB1/PBK/PDGFB/CNKSR3/SLC8A1/NR2F2/SMAD6/SIRPA/PLK1/PTPRJ/SFN/NTF3/PLPP3/GPRC5A/INHBA/CAV1/TGFB2/BMP4	43
548	downregulated.Antt vs VC	Downregulated	Antt vs VC	BP	GO:0010712	Regulation of collagen metabolic process	9/1101	43/18800	0.000725825	0.006996	0.00528126	VIM/TGFB1/SERPINB7/TGFB3/F2R/PDGFRB/CCN2/CREB3L1/BMP4	9
549	downregulated.Antt vs VC	Downregulated	Antt vs VC	BP	GO:1903055	Positive regulation of extracellular matrix organization	7/1101	27/18800	0.00073065	0.00702967	0.00530668	TGFB1/PHLDB1/SOX9/FSCN1/SMAD3/CARMIL2/PHLDB2	7
550	downregulated.Antt vs VC	Downregulated	Antt vs VC	BP	GO:0010563	Negative regulation of phosphorus metabolic process	43/1101	441/18800	0.000737125	0.00707908	0.00534398	NCAPG2/EPHB2/LPIN1/CDKN2B/HMGCR/ROCK2/KIRREL1/CALM3/GADD45B/AJUBA/CORO1C/KAT2B/SWAP70/PRR5L/TGFB1/PDGFA/CTDSPL/NF2/HYAL2/DMD/SOCS3/PRKAR2B/CDKN2C/IGFBP3/DBNDD1/HSPB1/PBK/PDGFB/CNKSR3/SLC8A1/NR2F2/SMAD6/SIRPA/PLK1/PTPRJ/SFN/NTF3/PLPP3/GPRC5A/INHBA/CAV1/TGFB2/BMP4	43
551	downregulated.Antt vs VC	Downregulated	Antt vs VC	BP	GO:0048593	Camera-type eye morphogenesis	17/1101	122/18800	0.000751524	0.00720427	0.00543848	EPHB2/GDF11/HIF1A/TBX2/EPHA2/SOX9/GLI3/NECTIN1/CITED2/FAT1/LHX1/SHROOM2/BCAR3/PITX2/FOXF2/COL8A1/BMP4	17
552	downregulated.Antt vs VC	Downregulated	Antt vs VC	BP	GO:0003215	Cardiac right ventricle morphogenesis	6/1101	20/18800	0.000757471	0.00723501	0.00546169	PPP1R13L/NOTCH1/NKX2-5/SEMA3C/SOX4/TGFB2	6
553	downregulated.Antt vs VC	Downregulated	Antt vs VC	BP	GO:0035313	Wound healing, spreading of epidermal cells	6/1101	20/18800	0.000757471	0.00723501	0.00546169	AJUBA/HBEGF/FERMT2/WNT7A/MSX2/PHLDB2	6
554	downregulated.Antt vs VC	Downregulated	Antt vs VC	BP	GO:0007369	Gastrulation	23/1101	190/18800	0.000762239	0.00726741	0.00548615	TGIF2/FZD7/PHLDB1/NF2/EPHA2/COL7A1/SRF/BMPR2/ITGA7/SMAD3/LHX1/ETS2/FOXC2/APLN/PHLDB2/SIX2/COL8A1/WNT5B/FGFR2/INHBA/ATOH8/WNT3/BMP4	23
555	downregulated.Antt vs VC	Downregulated	Antt vs VC	BP	GO:0032963	Collagen metabolic process	15/1101	101/18800	0.000772123	0.00734839	0.00554728	VIM/HIF1A/FURIN/TGFB1/TNS2/TRAM2/MMP24/P3H2/SERPINB7/TGFB3/F2R/PDGFRB/CCN2/CREB3L1/BMP4	15
556	downregulated.Antt vs VC	Downregulated	Antt vs VC	BP	GO:0043087	Regulation of gtpase activity	37/1101	364/18800	0.000789743	0.00750256	0.00566366	RANGAP1/PLXNA1/SIPA1L2/IQSEC1/ASAP1/AJUBA/CORO1C/ECT2/ASAP3/MTSS2/IQGAP3/ARHGAP11A/TBC1D1/EPHA2/ARHGAP29/AGRN/FERMT2/EZH2/SH3BP4/DOCK10/ARHGAP42/PLXND1/F2RL1/NEDD9/PLXNA4/BCAR3/STMN1/ARHGEF26/S100A10/F2R/ADCYAP1/NTF3/TIAM2/CAV2/RGS4/S1PR1/RIPOR2	37
557	downregulated.Antt vs VC	Downregulated	Antt vs VC	BP	GO:0045638	Negative regulation of myeloid cell differentiation	14/1101	91/18800	0.000800501	0.0075775	0.00572024	MEIS2/ITPKB/STAT5B/H4C12/H4C3/H4C8/CDK6/H4C11/H4C14/HMGB3/H4C15/H4C2/INHBA/LRRC17	14
558	downregulated.Antt vs VC	Downregulated	Antt vs VC	BP	GO:0090398	Cellular senescence	14/1101	91/18800	0.000800501	0.0075775	0.00572024	NEK6/PAWR/CDKN2B/IGF1R/TBX2/RBL1/SRF/PRMT6/CDK6/FBXO5/NUAK1/H2AX/CDK2/PLK2	14
559	downregulated.Antt vs VC	Downregulated	Antt vs VC	BP	GO:0048144	Fibroblast proliferation	13/1101	81/18800	0.000810213	0.00765571	0.00577928	PAWR/FOSL2/PDGFA/CCNB1/GAS6/CDK6/PDGFB/C1QL4/PDGFC/WNT7B/CCNA2/PDGFRB/E2F1	13
560	downregulated.Antt vs VC	Downregulated	Antt vs VC	BP	GO:1901989	Positive regulation of cell cycle phase transition	17/1101	123/18800	0.000825506	0.00778629	0.00587785	ATAD5/DLGAP5/CCNB1/TBX2/CDC25C/EZH2/UBE2C/DTL/FBXO5/ESPL1/CDC25A/CDC25B/CCND1/RRM2/CDK1/CDC7/FAM83D	17
561	downregulated.Antt vs VC	Downregulated	Antt vs VC	BP	GO:0043434	Response to peptide hormone	40/1101	404/18800	0.000828048	0.00779634	0.00588544	RANGAP1/NUCKS1/SIK2/PKM/LPIN1/PXN/ROCK2/SOGA1/KAT2B/IGF1R/STAT5B/BCAR1/RAB15/ERFE/TNS2/RAB31/BAIAP2/SOCS3/SOCS2/SESN3/PNPLA3/NEFL/GNAI1/FOXC2/GCNT1/BCAR3/PLAT/CCNA2/TGFBR3/PIK3R3/KANK1/INSIG1/BRIP1/IRS1/CAV2/CCN2/CAV1/PCSK9/OXTR/EDN1	40
562	downregulated.Antt vs VC	Downregulated	Antt vs VC	BP	GO:0007599	Hemostasis	26/1101	227/18800	0.000832106	0.00782061	0.00590376	TYRO3/AXL/EPHB2/DGKH/MYH9/PDGFA/FLI1/SRF/RAP2B/GAS6/ACTB/HSPB1/PDGFB/F2RL1/TBXA2R/ANXA8/ST3GAL4/PLAT/VCL/SERPINE1/F2R/ACTG1/THBS1/CAV1/F3/EDN1	26
563	downregulated.Antt vs VC	Downregulated	Antt vs VC	BP	GO:0010972	Negative regulation of g2/m transition of mitotic cell cycle	11/1101	62/18800	0.000854226	0.00800004	0.00603921	CLSPN/TICRR/MIIP/AURKB/BLM/FOXN3/DTL/NABP1/CDK1/PLK1/FHL1	11
564	downregulated.Antt vs VC	Downregulated	Antt vs VC	BP	GO:0046579	Positive regulation of ras protein signal transduction	11/1101	62/18800	0.000854226	0.00800004	0.00603921	LPAR1/ITPKB/NOTCH1/AUTS2/F2RL1/F2R/KITLG/PDGFRB/SYNPO2L/NRG1/LPAR4	11
565	downregulated.Antt vs VC	Downregulated	Antt vs VC	BP	GO:0010717	Regulation of epithelial to mesenchymal transition	15/1101	102/18800	0.000857238	0.00801404	0.00604978	TGFB1I1/TGFB1/PHLDB1/NOTCH1/FERMT2/EZH2/SMAD3/BAMBI/ZNF703/TGFB3/AXIN2/PHLDB2/GLIPR2/TGFB2/BMP4	15
566	downregulated.Antt vs VC	Downregulated	Antt vs VC	BP	GO:0007595	Lactation	9/1101	44/18800	0.000865707	0.00806467	0.006088	STAT5B/HIF1A/SOCS2/DDR1/SLC29A1/CCND1/APLN/CAV1/OXTR	9
567	downregulated.Antt vs VC	Downregulated	Antt vs VC	BP	GO:0097178	Ruffle assembly	9/1101	44/18800	0.000865707	0.00806467	0.006088	CORO1C/MTSS2/EPS8/CSPG4/EPS8L2/CARMIL2/ARHGEF26/KANK1/CAV1	9
568	downregulated.Antt vs VC	Downregulated	Antt vs VC	BP	GO:0030856	Regulation of epithelial cell differentiation	20/1101	157/18800	0.000867237	0.0080647	0.00608802	CDKN2B/ROCK2/STAT5B/PTCH1/AJAP1/NOTCH1/SOX9/APOLD1/EZH2/LHX1/CCND1/MSX2/CD24/VCL/SERPINE1/SFN/ID1/CAV1/ATOH8/BMP4	20
569	downregulated.Antt vs VC	Downregulated	Antt vs VC	BP	GO:0060347	Heart trabecula formation	5/1101	14/18800	0.000875671	0.00810034	0.00611493	SRF/NKX2-5/FHL2/ADGRG6/TGFBR3	5
570	downregulated.Antt vs VC	Downregulated	Antt vs VC	BP	GO:0070307	Lens fiber cell development	5/1101	14/18800	0.000875671	0.00810034	0.00611493	VIM/EPHA2/WNT7A/WNT7B/WNT5B	5
571	downregulated.Antt vs VC	Downregulated	Antt vs VC	BP	GO:1903729	Regulation of plasma membrane organization	5/1101	14/18800	0.000875671	0.00810034	0.00611493	ASAP1/GSN/MYH9/ATP8B1/SYTL4	5
572	downregulated.Antt vs VC	Downregulated	Antt vs VC	BP	GO:1902743	Regulation of lamellipodium organization	10/1101	53/18800	0.000885406	0.00817608	0.0061721	ACTR3/CD44/CORO1C/ARPIN/EPHA2/FSCN1/PLCE1/CARMIL2/AUTS2/KANK1	10
573	downregulated.Antt vs VC	Downregulated	Antt vs VC	BP	GO:0043281	Regulation of cysteine-type endopeptidase activity involved in apoptotic process	24/1101	204/18800	0.000890273	0.00818666	0.00618009	CD44/GSN/DAPK1/HMGB1/FAS/CCN1/MALT1/GAS6/DHCR24/CRYAB/EGLN3/SMAD3/BOK/ARL6IP1/HIP1/RPS6KA1/TNFAIP8/UACA/F2R/SFN/NKX3-1/THBS1/CCN2/F3	24
574	downregulated.Antt vs VC	Downregulated	Antt vs VC	BP	GO:0001824	Blastocyst development	16/1101	113/18800	0.000891097	0.00818666	0.00618009	NCAPG2/CAPN2/FURIN/NEK2/TM4SF1/BCOR/TBL1XR1/SRF/PLPP4/TET1/CITED2/NASP/GINS1/RRM2/TEAD4/ASF1B	16
575	downregulated.Antt vs VC	Downregulated	Antt vs VC	BP	GO:0043491	Protein kinase b signaling	25/1101	216/18800	0.000892359	0.00818666	0.00618009	TYRO3/AXL/IGF1R/PHLPP1/TGFB1/PDGFA/HBEGF/EPHA2/HYAL2/SOX9/FERMT2/GAS6/SESN3/PIK3CD/EGF/HIP1/RASD2/MYORG/PIK3R3/PTPRJ/NKX3-1/THBS1/NRG1/LIN28A/F3	25
576	downregulated.Antt vs VC	Downregulated	Antt vs VC	BP	GO:0002065	Columnar/cuboidal epithelial cell differentiation	14/1101	92/18800	0.000894302	0.00818666	0.00618009	TUBB/RARG/HIF1A/NOTCH1/FASN/CDK6/FAM20C/TYMS/SERPINE1/ROS1/FGFR2/PRDM1/SOX4/BMP4	14
577	downregulated.Antt vs VC	Downregulated	Antt vs VC	BP	GO:0009953	Dorsal/ventral pattern formation	14/1101	92/18800	0.000894302	0.00818666	0.00618009	SUFU/PTCH1/GPR161/GLI3/LHX1/GLI2/WNT7A/AXIN2/SMAD6/LHX2/WNT3/HHIP/EDN1/BMP4	14
578	downregulated.Antt vs VC	Downregulated	Antt vs VC	BP	GO:0035567	Non-canonical wnt signaling pathway	12/1101	72/18800	0.000902285	0.00820461	0.00619364	DACT1/FZD7/SMURF2/FZD4/VANGL1/FZD2/DAAM2/WNT7A/PRICKLE1/PRICKLE2/WNT5B/NKD1	12
579	downregulated.Antt vs VC	Downregulated	Antt vs VC	BP	GO:0072078	Nephron tubule morphogenesis	12/1101	72/18800	0.000902285	0.00820461	0.00619364	PTCH1/SOX9/FOXD1/GLI3/LHX1/IRX3/LAMA5/SIX2/SALL1/FGF1/LGR4/BMP4	12
580	downregulated.Antt vs VC	Downregulated	Antt vs VC	BP	GO:0050808	Synapse organization	41/1101	419/18800	0.000903472	0.00820461	0.00619364	NRP2/DBN1/EPHB2/TUBB/IGF1R/NLGN2/ACTN1/MDGA1/ADD2/ZDHHC12/NEFH/AGRN/BAIAP2/PDLIM5/ZNF365/CACNB3/SHANK3/NECTIN1/CDC20/FLRT2/DOCK10/NEFL/TUBA1A/PLXND1/COL4A5/ACTB/COL4A1/LRFN4/WNT7A/FRMPD4/WNT7B/ST8SIA2/EFNB2/SYNPO/F2R/ACTG1/BDNF/KIRREL3/CTNND2/NRG1/OXTR	41
581	downregulated.Antt vs VC	Downregulated	Antt vs VC	BP	GO:0021543	Pallium development	21/1101	169/18800	0.00090403	0.00820461	0.00619364	IGF1R/TACC3/BTBD3/PHLPP2/HIF1A/MDGA1/NF2/SRF/EZH2/DLX1/GLI3/CDK6/NEFL/ASPM/DIXDC1/H2AX/ATP2B4/CNTNAP2/LHX2/KIRREL3/DCLK2	21
582	downregulated.Antt vs VC	Downregulated	Antt vs VC	BP	GO:0021953	Central nervous system neuron differentiation	21/1101	169/18800	0.00090403	0.00820461	0.00619364	NRP2/EPHB2/SUFU/PTCH1/MDGA1/NIN/DLX1/GLI3/SHANK3/LHX1/GLI2/PLXNA4/EPHB6/TOX/WNT7A/NFIB/CDH11/FGFR2/DCLK2/INHBA/SOX4	21
583	downregulated.Antt vs VC	Downregulated	Antt vs VC	BP	GO:0001933	Negative regulation of protein phosphorylation	35/1101	341/18800	0.000910016	0.00824477	0.00622396	NCAPG2/EPHB2/CDKN2B/HMGCR/KIRREL1/CALM3/GADD45B/CORO1C/KAT2B/PRR5L/TGFB1/CTDSPL/NF2/HYAL2/DMD/SOCS3/PRKAR2B/CDKN2C/IGFBP3/DBNDD1/HSPB1/PBK/CNKSR3/SLC8A1/NR2F2/SMAD6/SIRPA/PLK1/PTPRJ/SFN/NTF3/PLPP3/GPRC5A/CAV1/BMP4	35
584	downregulated.Antt vs VC	Downregulated	Antt vs VC	BP	GO:0019932	Second-messenger-mediated signaling	32/1101	303/18800	0.000922072	0.00832753	0.00628643	CALM3/CACNA1C/LMCD1/DMD/MCU/SOX9/ATP1B1/INPP5A/PLCE1/DDAH1/GNAI1/FHL2/DYRK2/ADGRG6/RCAN3/RASD2/TBXA2R/GRIN2D/PTGFR/SLC8A1/ADGRB2/ATP2B4/ACKR3/ADCYAP1/PTPRJ/KSR2/NPPB/THBS1/GRIN2A/GBP1/NRG1/EDN1	32
585	downregulated.Antt vs VC	Downregulated	Antt vs VC	BP	GO:0003416	Endochondral bone growth	7/1101	28/18800	0.000925456	0.00832753	0.00628643	ANXA6/RARG/SOX9/BNC2/MSX2/FGFR2/FGFR3	7
586	downregulated.Antt vs VC	Downregulated	Antt vs VC	BP	GO:0060512	Prostate gland morphogenesis	7/1101	28/18800	0.000925456	0.00832753	0.00628643	RARG/NOTCH1/SOX9/HOXA13/NKX3-1/FGFR2/BMP4	7
587	downregulated.Antt vs VC	Downregulated	Antt vs VC	BP	GO:1903319	Positive regulation of protein maturation	7/1101	28/18800	0.000925456	0.00832753	0.00628643	ANXA2/GSN/MYH9/SPON1/S100A10/CCBE1/SOX4	7
588	downregulated.Antt vs VC	Downregulated	Antt vs VC	BP	GO:0035909	Aorta morphogenesis	8/1101	36/18800	0.000937844	0.00842465	0.00635975	TBX2/NOTCH1/SRF/MYLK/EFNB2/PDGFRB/SOX4/TGFB2	8
589	downregulated.Antt vs VC	Downregulated	Antt vs VC	BP	GO:0032869	Cellular response to insulin stimulus	24/1101	205/18800	0.000953767	0.00855314	0.00645674	NUCKS1/SIK2/PKM/LPIN1/SOGA1/KAT2B/IGF1R/BCAR1/RAB15/ERFE/TNS2/RAB31/BAIAP2/SOCS3/SESN3/PNPLA3/FOXC2/BCAR3/PIK3R3/KANK1/INSIG1/IRS1/CAV2/PCSK9	24
590	downregulated.Antt vs VC	Downregulated	Antt vs VC	BP	GO:0008544	Epidermis development	36/1101	355/18800	0.000963217	0.00862324	0.00650966	ROCK2/KRT86/KRT81/NSDHL/PTCH1/FOSL2/PDGFA/EPHA2/NOTCH1/SOX9/COL7A1/EZH2/KAZN/GLI2/KRT34/ALX4/LAMA5/ERCC2/MSX2/PITX2/PALLD/SFN/KRT80/FGFR2/FST/LHX2/SOX18/CCN2/NTF4/INHBA/POU2F3/TNFRSF19/LGR4/TGFB2/LGR5/BMP4	36
591	downregulated.Antt vs VC	Downregulated	Antt vs VC	BP	GO:0060675	Ureteric bud morphogenesis	11/1101	63/18800	0.000981099	0.00875678	0.00661047	PTCH1/SOX9/FOXD1/GLI3/LHX1/LAMA5/SIX2/SALL1/FGF1/LGR4/BMP4	11
592	downregulated.Antt vs VC	Downregulated	Antt vs VC	BP	GO:0003014	Renal system process	16/1101	114/18800	0.000981449	0.00875678	0.00661047	KCNMA1/KIRREL1/MYO1E/GSN/EMP2/WFS1/HYAL2/GAS6/SGK1/PDGFB/F2RL1/F2R/ADORA1/NPPB/EDN1/BMP4	16
593	downregulated.Antt vs VC	Downregulated	Antt vs VC	BP	GO:0043576	Regulation of respiratory gaseous exchange	6/1101	21/18800	0.00100833	0.00896634	0.00676867	NLGN2/SLC5A3/PASK/GLS/PBX3/ADORA1	6
594	downregulated.Antt vs VC	Downregulated	Antt vs VC	BP	GO:0072111	Cell proliferation involved in kidney development	6/1101	21/18800	0.00100833	0.00896634	0.00676867	PTCH1/PDGFB/SERPINB7/PDGFRB/LIN28A/BMP4	6
595	downregulated.Antt vs VC	Downregulated	Antt vs VC	BP	GO:0007162	Negative regulation of cell adhesion	32/1101	305/18800	0.00102913	0.0091329	0.00689441	PLXNA1/EPHB2/PAWR/CBFB/CORO1C/SWAP70/ILDR2/AJAP1/TGFB1/HMGB1/FZD7/NF2/SOCS6/NOTCH1/TGFBI/PODXL/GLI3/FZD4/CD274/TMEM131L/PLXND1/ACTN4/PLXNA4/SNAI2/ZNF703/SERPINE1/PHLDB2/KANK1/THBS1/GBP1/RIPOR2/BMP4	32
596	downregulated.Antt vs VC	Downregulated	Antt vs VC	BP	GO:0030834	Regulation of actin filament depolymerization	10/1101	54/18800	0.00103052	0.0091329	0.00689441	SWAP70/GSN/SPTAN1/EPS8/ADD2/TMOD2/WDR1/CARMIL2/F2RL1/LIMA1	10
597	downregulated.Antt vs VC	Downregulated	Antt vs VC	BP	GO:0000077	Dna damage checkpoint signaling	16/1101	115/18800	0.00107945	0.00955051	0.00720965	CLSPN/TICRR/MAP3K20/BLM/GTSE1/FOXN3/DTL/CCND1/H2AX/CDK1/PLK1/WDR76/CDK2/E2F1/BRIP1/PLK2	16
598	downregulated.Antt vs VC	Downregulated	Antt vs VC	BP	GO:0050918	Positive chemotaxis	11/1101	64/18800	0.00112314	0.00990385	0.00747639	HMGB2/HMGB1/SMAD3/PDGFB/F2RL1/VEGFC/PTPRJ/NTF3/S1PR1/F3/BMP4	11
599	downregulated.Antt vs VC	Downregulated	Antt vs VC	BP	GO:0072171	Mesonephric tubule morphogenesis	11/1101	64/18800	0.00112314	0.00990385	0.00747639	PTCH1/SOX9/FOXD1/GLI3/LHX1/LAMA5/SIX2/SALL1/FGF1/LGR4/BMP4	11
600	downregulated.Antt vs VC	Downregulated	Antt vs VC	BP	GO:0003161	Cardiac conduction system development	8/1101	37/18800	0.00113595	0.0099835	0.00753652	HCN4/NOTCH1/NKX2-5/IRX3/MSX2/NPPB/NRG1/BMP4	8
601	downregulated.Antt vs VC	Downregulated	Antt vs VC	BP	GO:0003230	Cardiac atrium development	8/1101	37/18800	0.00113595	0.0099835	0.00753652	NSD2/IGF1R/NOTCH1/CCN1/BMPR2/NKX2-5/SOX4/TGFB2	8
602	downregulated.Antt vs VC	Downregulated	Antt vs VC	BP	GO:0045669	Positive regulation of osteoblast differentiation	12/1101	74/18800	0.0011575	0.0100849	0.00761306	FERMT2/CCN1/GLI3/BMPR2/RUNX2/FBXO5/FAM20C/MSX2/WNT7B/PDLIM7/TENT5A/BMP4	12
603	downregulated.Antt vs VC	Downregulated	Antt vs VC	BP	GO:0072088	Nephron epithelium morphogenesis	12/1101	74/18800	0.0011575	0.0100849	0.00761306	PTCH1/SOX9/FOXD1/GLI3/LHX1/IRX3/LAMA5/SIX2/SALL1/FGF1/LGR4/BMP4	12
604	downregulated.Antt vs VC	Downregulated	Antt vs VC	BP	GO:0003209	Cardiac atrium morphogenesis	7/1101	29/18800	0.00115894	0.0100849	0.00761306	NSD2/NOTCH1/CCN1/BMPR2/NKX2-5/SOX4/TGFB2	7
605	downregulated.Antt vs VC	Downregulated	Antt vs VC	BP	GO:0021602	Cranial nerve morphogenesis	7/1101	29/18800	0.00115894	0.0100849	0.00761306	NRP2/EPHB2/ATP8B1/GLI3/CITED2/KCNA2/PLXNA4	7
606	downregulated.Antt vs VC	Downregulated	Antt vs VC	BP	GO:0051491	Positive regulation of filopodium assembly	7/1101	29/18800	0.00115894	0.0100849	0.00761306	FNBP1L/AGRN/SRF/FSCN1/TENM2/TGFB3/RIPOR2	7
607	downregulated.Antt vs VC	Downregulated	Antt vs VC	BP	GO:0060037	Pharyngeal system development	7/1101	29/18800	0.00115894	0.0100849	0.00761306	PTCH1/BMPR2/NKX2-5/NKX3-1/TGFB2/EDN1/BMP4	7
608	downregulated.Antt vs VC	Downregulated	Antt vs VC	BP	GO:0030510	Regulation of bmp signaling pathway	15/1101	105/18800	0.00116171	0.0100924	0.00761873	CRIM1/NOTCH1/SMURF2/FOXD1/CCN1/DLX1/BMPR2/BAMBI/FSTL1/HOXA13/BMPER/MSX2/SMAD6/FST/BMP4	15
609	downregulated.Antt vs VC	Downregulated	Antt vs VC	BP	GO:0043406	Positive regulation of map kinase activity	16/1101	116/18800	0.00118561	0.010283	0.00776264	TRAF2/AJUBA/TGFB1/PDGFA/EZH2/FZD4/PDGFB/EGF/PDGFC/CD24/KITLG/PDGFRB/NTF3/THBS1/FGF1/EDN1	16
610	downregulated.Antt vs VC	Downregulated	Antt vs VC	BP	GO:0051784	Negative regulation of nuclear division	10/1101	55/18800	0.00119452	0.0103434	0.0078082	BUB1B/XRCC3/CCNB1/AURKB/CENPF/FBXO5/SPDL1/ZWINT/PLK1/BMP4	10
611	downregulated.Antt vs VC	Downregulated	Antt vs VC	BP	GO:0007596	Blood coagulation	25/1101	221/18800	0.00123838	0.0107055	0.00808153	TYRO3/AXL/EPHB2/DGKH/MYH9/PDGFA/SRF/RAP2B/GAS6/ACTB/HSPB1/PDGFB/F2RL1/TBXA2R/ANXA8/ST3GAL4/PLAT/VCL/SERPINE1/F2R/ACTG1/THBS1/CAV1/F3/EDN1	25
612	downregulated.Antt vs VC	Downregulated	Antt vs VC	BP	GO:0000212	Meiotic spindle organization	5/1101	15/18800	0.00125052	0.0107055	0.00808153	CCNB2/MYH9/FBXO5/ESPL1/ASPM	5
613	downregulated.Antt vs VC	Downregulated	Antt vs VC	BP	GO:0006271	Dna strand elongation involved in dna replication	5/1101	15/18800	0.00125052	0.0107055	0.00808153	PCNA/MCM3/POLE/DNA2/GINS1	5
614	downregulated.Antt vs VC	Downregulated	Antt vs VC	BP	GO:0010763	Positive regulation of fibroblast migration	5/1101	15/18800	0.00125052	0.0107055	0.00808153	TGFB1/AKAP12/SLC8A1/THBS1/ACTA2	5
615	downregulated.Antt vs VC	Downregulated	Antt vs VC	BP	GO:0060707	Trophoblast giant cell differentiation	5/1101	15/18800	0.00125052	0.0107055	0.00808153	SOCS3/PLK4/NR2F2/E2F8/PRDM1	5
616	downregulated.Antt vs VC	Downregulated	Antt vs VC	BP	GO:0061307	Cardiac neural crest cell differentiation involved in heart development	5/1101	15/18800	0.00125052	0.0107055	0.00808153	CITED2/PITX2/SEMA3C/EDN1/BMP4	5
617	downregulated.Antt vs VC	Downregulated	Antt vs VC	BP	GO:0061308	Cardiac neural crest cell development involved in heart development	5/1101	15/18800	0.00125052	0.0107055	0.00808153	CITED2/PITX2/SEMA3C/EDN1/BMP4	5
618	downregulated.Antt vs VC	Downregulated	Antt vs VC	BP	GO:0008203	Cholesterol metabolic process	18/1101	139/18800	0.00127246	0.0108756	0.00820998	HMGCR/LDLR/RXRA/NSDHL/SREBF2/LBR/DHCR24/LSS/ACLY/CYP51A1/EBP/LIMA1/FDFT1/INSIG1/MSMO1/HMGCS1/FGF1/PCSK9	18
619	downregulated.Antt vs VC	Downregulated	Antt vs VC	BP	GO:0000724	Double-strand break repair via homologous recombination	20/1101	162/18800	0.00128305	0.0109484	0.00826493	NUCKS1/RAD54L/MCM3/MCM2/RMI1/HDGFL2/TIMELESS/XRCC3/MMS22L/ZNF365/BLM/NABP1/ACTB/TONSL/GINS2/RAD51/H2AX/MCM5/CDC7/RAD54B	20
620	downregulated.Antt vs VC	Downregulated	Antt vs VC	BP	GO:0045931	Positive regulation of mitotic cell cycle	17/1101	128/18800	0.00129565	0.0110381	0.00833261	MEIS2/STAT5B/DLGAP5/CCNB1/CDC25C/UBE2C/DTL/FBXO5/ESPL1/CDC25A/CDC25B/CCND1/RRM2/CDK1/CDC7/NKX3-1/USP2	17
621	downregulated.Antt vs VC	Downregulated	Antt vs VC	BP	GO:0043536	Positive regulation of blood vessel endothelial cell migration	12/1101	75/18800	0.00130596	0.0111081	0.00838544	HIF1A/TGFB1/HMGB1/JCAD/HSPB1/PDGFB/FOXC2/VEGFC/RHOJ/THBS1/FGFBP1/PLK2	12
622	downregulated.Antt vs VC	Downregulated	Antt vs VC	BP	GO:0002089	Lens morphogenesis in camera-type eye	6/1101	22/18800	0.00131839	0.011142	0.00841104	EPHA2/NECTIN1/CITED2/SHROOM2/BCAR3/BMP4	6
623	downregulated.Antt vs VC	Downregulated	Antt vs VC	BP	GO:0048634	Regulation of muscle organ development	6/1101	22/18800	0.00131839	0.011142	0.00841104	TGFB1/MRTFB/CENPF/SMAD3/JPH2/BMP4	6
624	downregulated.Antt vs VC	Downregulated	Antt vs VC	BP	GO:0061318	Renal filtration cell differentiation	6/1101	22/18800	0.00131839	0.011142	0.00841104	MYO1E/PODXL/BASP1/FOXC2/CD24/BMP4	6
625	downregulated.Antt vs VC	Downregulated	Antt vs VC	BP	GO:0072112	Glomerular visceral epithelial cell differentiation	6/1101	22/18800	0.00131839	0.011142	0.00841104	MYO1E/PODXL/BASP1/FOXC2/CD24/BMP4	6
626	downregulated.Antt vs VC	Downregulated	Antt vs VC	BP	GO:0010720	Positive regulation of cell development	31/1101	297/18800	0.00132895	0.0112133	0.00846491	PLXNA1/DBN1/EPHB2/HIF1A/TGFB1/BAIAP2/NIN/ZNF365/NOTCH1/FERMT2/NUMBL/SRF/GLI3/BMPR2/SHANK3/CLCF1/NEFL/PLXND1/ASPM/NEDD9/PLXNA4/DIXDC1/VEGFC/SEMA7A/S100A10/BDNF/E2F1/TIAM2/WNT3/ZNF488/BMP4	31
627	downregulated.Antt vs VC	Downregulated	Antt vs VC	BP	GO:0043547	Positive regulation of gtpase activity	29/1101	272/18800	0.00135201	0.0113896	0.00859802	RANGAP1/SIPA1L2/IQSEC1/ASAP1/CORO1C/ECT2/ASAP3/MTSS2/ARHGAP11A/TBC1D1/EPHA2/ARHGAP29/AGRN/FERMT2/EZH2/DOCK10/ARHGAP42/F2RL1/NEDD9/BCAR3/ARHGEF26/S100A10/F2R/ADCYAP1/NTF3/TIAM2/CAV2/RGS4/S1PR1	29
628	downregulated.Antt vs VC	Downregulated	Antt vs VC	BP	GO:0007094	Mitotic spindle assembly checkpoint signaling	8/1101	38/18800	0.00136604	0.0114349	0.00863221	BUB1B/XRCC3/CCNB1/AURKB/CENPF/SPDL1/ZWINT/PLK1	8
629	downregulated.Antt vs VC	Downregulated	Antt vs VC	BP	GO:0035136	Forelimb morphogenesis	8/1101	38/18800	0.00136604	0.0114349	0.00863221	CACNA1C/RUNX2/RECK/HOXA13/ALX4/WNT7A/MSX2/WNT3	8
630	downregulated.Antt vs VC	Downregulated	Antt vs VC	BP	GO:0071173	Spindle assembly checkpoint signaling	8/1101	38/18800	0.00136604	0.0114349	0.00863221	BUB1B/XRCC3/CCNB1/AURKB/CENPF/SPDL1/ZWINT/PLK1	8
631	downregulated.Antt vs VC	Downregulated	Antt vs VC	BP	GO:0071174	Mitotic spindle checkpoint signaling	8/1101	38/18800	0.00136604	0.0114349	0.00863221	BUB1B/XRCC3/CCNB1/AURKB/CENPF/SPDL1/ZWINT/PLK1	8
632	downregulated.Antt vs VC	Downregulated	Antt vs VC	BP	GO:0001558	Regulation of cell growth	40/1101	415/18800	0.00137748	0.0115125	0.00869073	EXTL3/DBN1/JADE1/TEAD1/BCAR1/TGFB1/PSRC1/HDGFL2/HBEGF/HYAL2/SRF/IGFBPL1/BMPR2/SH3BP4/PLCE1/SOCS2/SGK1/CCDC85B/CRYAB/CDKN2C/DDR1/SMAD3/EXOSC9/RPS6KA1/PLXNA4/SEMA7A/ROS1/FHL1/PTPRJ/SFN/BDNF/SEMA3C/NPPB/TMEM97/N6AMT1/RGS4/INHBA/WNT3/TGFB2/EDN1	40
633	downregulated.Antt vs VC	Downregulated	Antt vs VC	BP	GO:1903522	Regulation of blood circulation	28/1101	260/18800	0.00139493	0.0116399	0.00878691	CALM3/CACNA1C/TBX2/HBEGF/DMD/HCN4/ATP1B1/BMPR2/THRA/GJC1/ARHGAP42/NKX2-5/IRX3/TBXA2R/APLN/SLC8A1/ATP2B4/F2R/DES/ADORA1/ADRA1D/TPM1/CCN2/RGS4/CAV1/TGFB2/OXTR/EDN1	28
634	downregulated.Antt vs VC	Downregulated	Antt vs VC	BP	GO:0055010	Ventricular cardiac muscle tissue morphogenesis	9/1101	47/18800	0.0014214	0.011842	0.00893949	TGFB1/NOTCH1/NKX2-5/FOXC2/TGFBR3/FGFR2/TPM1/NRG1/TGFB2	9
635	downregulated.Antt vs VC	Downregulated	Antt vs VC	BP	GO:0008286	Insulin receptor signaling pathway	16/1101	118/18800	0.00142453	0.0118494	0.00894507	NUCKS1/SIK2/SOGA1/IGF1R/BCAR1/ERFE/TNS2/BAIAP2/SOCS3/SESN3/FOXC2/BCAR3/PIK3R3/KANK1/IRS1/CAV2	16
636	downregulated.Antt vs VC	Downregulated	Antt vs VC	BP	GO:1990778	Protein localization to cell periphery	34/1101	337/18800	0.00143277	0.0118992	0.00898267	EPB41L2/EHD2/EPHB2/PACS1/ROCK2/STAC/EMP2/RAB15/PTCH1/TGFB1/SLC9A3R2/RAB31/EPHA2/ATP1B1/CACNB3/GAS6/TSPAN14/CCDC88A/ACTB/GNAI1/RAB3B/LAMA5/ATP2B4/ANK1/S100A10/PLK1/TSPAN15/EZR/PKP3/LYPD1/CAV1/GRIN2A/GBP1/MISP	34
637	downregulated.Antt vs VC	Downregulated	Antt vs VC	BP	GO:0034698	Response to gonadotropin	7/1101	30/18800	0.00143618	0.0119088	0.00898991	PAPPA/NOTCH1/PLAT/CCNA2/TGFBR3/INHBA/EDN1	7
638	downregulated.Antt vs VC	Downregulated	Antt vs VC	BP	GO:0000725	Recombinational repair	20/1101	164/18800	0.00149165	0.0123494	0.0093225	NUCKS1/RAD54L/MCM3/MCM2/RMI1/HDGFL2/TIMELESS/XRCC3/MMS22L/ZNF365/BLM/NABP1/ACTB/TONSL/GINS2/RAD51/H2AX/MCM5/CDC7/RAD54B	20
639	downregulated.Antt vs VC	Downregulated	Antt vs VC	BP	GO:0035296	Regulation of tube diameter	18/1101	141/18800	0.00149983	0.0123783	0.00934436	KCNMA1/ROCK2/BMPR2/KCNMB1/ARHGAP42/FOXC2/F2RL1/TBXA2R/SLC8A1/F2R/ADORA1/ADRA1D/ADRB2/NPPB/ACTA2/CAV1/OXTR/EDN1	18
640	downregulated.Antt vs VC	Downregulated	Antt vs VC	BP	GO:0097746	Blood vessel diameter maintenance	18/1101	141/18800	0.00149983	0.0123783	0.00934436	KCNMA1/ROCK2/BMPR2/KCNMB1/ARHGAP42/FOXC2/F2RL1/TBXA2R/SLC8A1/F2R/ADORA1/ADRA1D/ADRB2/NPPB/ACTA2/CAV1/OXTR/EDN1	18
641	downregulated.Antt vs VC	Downregulated	Antt vs VC	BP	GO:1902806	Regulation of cell cycle g1/s phase transition	22/1101	188/18800	0.00153105	0.0126162	0.00952394	JADE1/CDKN2B/MN1/DACT1/CTDSPL/TBX2/RBL1/EZH2/GTSE1/CDKN2C/CCND1/RRM2/ATP2B4/WEE1/FHL1/NKX3-1/FAM83D/KANK2/CDK2/E2F1/INHBA/PLK2	22
642	downregulated.Antt vs VC	Downregulated	Antt vs VC	BP	GO:0021761	Limbic system development	15/1101	108/18800	0.00155251	0.0127731	0.00964239	NRP2/IGF1R/PHLPP2/NF2/SRF/EZH2/DLX1/GLI3/CDK6/NEFL/ATP2B4/CNTNAP2/FGFR2/KIRREL3/DCLK2	15
643	downregulated.Antt vs VC	Downregulated	Antt vs VC	BP	GO:0007131	Reciprocal meiotic recombination	10/1101	57/18800	0.00158643	0.0130117	0.00982251	TEX11/RAD54L/RMI1/CENPX/TOP2A/RAD51/SHOC1/BRME1/RAD54B/BRIP1	10
644	downregulated.Antt vs VC	Downregulated	Antt vs VC	BP	GO:0140527	Reciprocal homologous recombination	10/1101	57/18800	0.00158643	0.0130117	0.00982251	TEX11/RAD54L/RMI1/CENPX/TOP2A/RAD51/SHOC1/BRME1/RAD54B/BRIP1	10
645	downregulated.Antt vs VC	Downregulated	Antt vs VC	BP	GO:0032147	Activation of protein kinase activity	18/1101	142/18800	0.00162584	0.0132796	0.0100247	CLSPN/TRAF2/EMP2/ECT2/MALT1/GAS6/CCDC88A/MOB3B/PDGFB/EGF/PDGFC/NTF3/ADRB2/GPRC5A/FGF1/NRG1/TGFB2/CARD10	18
646	downregulated.Antt vs VC	Downregulated	Antt vs VC	BP	GO:0035150	Regulation of tube size	18/1101	142/18800	0.00162584	0.0132796	0.0100247	KCNMA1/ROCK2/BMPR2/KCNMB1/ARHGAP42/FOXC2/F2RL1/TBXA2R/SLC8A1/F2R/ADORA1/ADRA1D/ADRB2/NPPB/ACTA2/CAV1/OXTR/EDN1	18
647	downregulated.Antt vs VC	Downregulated	Antt vs VC	BP	GO:0031577	Spindle checkpoint signaling	8/1101	39/18800	0.00163167	0.0132796	0.0100247	BUB1B/XRCC3/CCNB1/AURKB/CENPF/SPDL1/ZWINT/PLK1	8
648	downregulated.Antt vs VC	Downregulated	Antt vs VC	BP	GO:0045823	Positive regulation of heart contraction	8/1101	39/18800	0.00163167	0.0132796	0.0100247	NKX2-5/APLN/ADRA1D/TPM1/CCN2/RGS4/TGFB2/EDN1	8
649	downregulated.Antt vs VC	Downregulated	Antt vs VC	BP	GO:0071634	Regulation of transforming growth factor beta production	8/1101	39/18800	0.00163167	0.0132796	0.0100247	HIF1A/FURIN/SMAD3/SERPINB7/CD24/THBS1/ITGB8/TGFB2	8
650	downregulated.Antt vs VC	Downregulated	Antt vs VC	BP	GO:1903829	Positive regulation of protein localization	42/1101	446/18800	0.00165684	0.0134638	0.0101638	EPB41L2/EPHB2/ACSL4/ROCK2/STAC/NLGN2/PRR5L/HIF1A/ECT2/TGFB1/EPHA2/HYAL2/RIPOR1/MCU/SLC5A3/FERMT2/SREBF2/GLI3/GAS6/ANKRD1/SYTL4/CCDC88A/SMAD3/LIMK2/GNAI1/EGF/KCNN4/F2RL1/MTCL1/WNT7A/RPH3AL/TGFB3/GLUL/ATP2B4/VEGFC/CDK1/PLK1/SFN/EZR/SOX4/TGFB2/CARD10	42
651	downregulated.Antt vs VC	Downregulated	Antt vs VC	BP	GO:0016125	Sterol metabolic process	19/1101	154/18800	0.00168814	0.013637	0.0102946	HMGCR/LDLR/RXRA/NSDHL/ERG28/SREBF2/LBR/DHCR24/LSS/ACLY/CYP51A1/EBP/LIMA1/FDFT1/INSIG1/MSMO1/HMGCS1/FGF1/PCSK9	19
652	downregulated.Antt vs VC	Downregulated	Antt vs VC	BP	GO:0050817	Coagulation	25/1101	226/18800	0.0016945	0.013637	0.0102946	TYRO3/AXL/EPHB2/DGKH/MYH9/PDGFA/SRF/RAP2B/GAS6/ACTB/HSPB1/PDGFB/F2RL1/TBXA2R/ANXA8/ST3GAL4/PLAT/VCL/SERPINE1/F2R/ACTG1/THBS1/CAV1/F3/EDN1	25
653	downregulated.Antt vs VC	Downregulated	Antt vs VC	BP	GO:0003283	Atrial septum development	6/1101	23/18800	0.00169624	0.013637	0.0102946	NSD2/CCN1/BMPR2/NKX2-5/SOX4/TGFB2	6
654	downregulated.Antt vs VC	Downregulated	Antt vs VC	BP	GO:0030194	Positive regulation of blood coagulation	6/1101	23/18800	0.00169624	0.013637	0.0102946	TBXA2R/ST3GAL4/SERPINE1/F2R/THBS1/F3	6
655	downregulated.Antt vs VC	Downregulated	Antt vs VC	BP	GO:0036303	Lymph vessel morphogenesis	6/1101	23/18800	0.00169624	0.013637	0.0102946	EPHA2/BMPR2/FOXC2/VEGFC/CCBE1/SOX18	6
656	downregulated.Antt vs VC	Downregulated	Antt vs VC	BP	GO:0072311	Glomerular epithelial cell differentiation	6/1101	23/18800	0.00169624	0.013637	0.0102946	MYO1E/PODXL/BASP1/FOXC2/CD24/BMP4	6
657	downregulated.Antt vs VC	Downregulated	Antt vs VC	BP	GO:1900048	Positive regulation of hemostasis	6/1101	23/18800	0.00169624	0.013637	0.0102946	TBXA2R/ST3GAL4/SERPINE1/F2R/THBS1/F3	6
658	downregulated.Antt vs VC	Downregulated	Antt vs VC	BP	GO:0034446	Substrate adhesion-dependent cell spreading	15/1101	109/18800	0.00170501	0.0136867	0.0103321	TYRO3/AXL/PXN/CORO1C/ANTXR1/PEAK1/FZD7/FERMT2/FZD4/ACTN4/NEDD9/LAMA5/S100A10/KANK1/GBP1	15
659	downregulated.Antt vs VC	Downregulated	Antt vs VC	BP	GO:0009952	Anterior/posterior pattern specification	24/1101	214/18800	0.00172458	0.0138228	0.0104348	GDF11/RARG/NOTCH1/HES4/SRF/GLI3/BMPR2/SMAD3/LHX1/BASP1/HES6/ETS2/FOXC2/ALX4/MSX2/NR2F2/AXIN2/NKX3-1/PBX3/SIX2/SEMA3C/WNT3/LFNG/BMP4	24
660	downregulated.Antt vs VC	Downregulated	Antt vs VC	BP	GO:1902285	Semaphorin-plexin signaling pathway involved in neuron projection guidance	5/1101	16/18800	0.00173187	0.0138602	0.010463	PLXNA1/NRP2/PLXND1/PLXNA4/EDN1	5
661	downregulated.Antt vs VC	Downregulated	Antt vs VC	BP	GO:0061036	Positive regulation of cartilage development	7/1101	31/18800	0.00176253	0.0140629	0.0106161	SOX9/CCN1/GLI3/BMPR2/RUNX2/SMAD3/BMP4	7
662	downregulated.Antt vs VC	Downregulated	Antt vs VC	BP	GO:0098868	Bone growth	7/1101	31/18800	0.00176253	0.0140629	0.0106161	ANXA6/RARG/SOX9/BNC2/MSX2/FGFR2/FGFR3	7
663	downregulated.Antt vs VC	Downregulated	Antt vs VC	BP	GO:1901879	Regulation of protein depolymerization	13/1101	88/18800	0.00177625	0.0141511	0.0106826	SWAP70/GSN/SPTAN1/EPS8/MID1/ADD2/TMOD2/WDR1/NAV3/CKAP2/CARMIL2/F2RL1/LIMA1	13
664	downregulated.Antt vs VC	Downregulated	Antt vs VC	BP	GO:0003183	Mitral valve morphogenesis	4/1101	10/18800	0.00184738	0.0145857	0.0110107	NOTCH1/BMPR2/SMAD6/SOX4	4
665	downregulated.Antt vs VC	Downregulated	Antt vs VC	BP	GO:0003253	Cardiac neural crest cell migration involved in outflow tract morphogenesis	4/1101	10/18800	0.00184738	0.0145857	0.0110107	PITX2/SEMA3C/EDN1/BMP4	4
666	downregulated.Antt vs VC	Downregulated	Antt vs VC	BP	GO:0009157	Deoxyribonucleoside monophosphate biosynthetic process	4/1101	10/18800	0.00184738	0.0145857	0.0110107	TK1/DCK/SHMT1/TYMS	4
667	downregulated.Antt vs VC	Downregulated	Antt vs VC	BP	GO:0030214	Hyaluronan catabolic process	4/1101	10/18800	0.00184738	0.0145857	0.0110107	CD44/CEMIP2/TGFB1/HYAL2	4
668	downregulated.Antt vs VC	Downregulated	Antt vs VC	BP	GO:0055015	Ventricular cardiac muscle cell development	4/1101	10/18800	0.00184738	0.0145857	0.0110107	LMNA/NKX2-5/FHL2/CDK1	4
669	downregulated.Antt vs VC	Downregulated	Antt vs VC	BP	GO:0061626	Pharyngeal arch artery morphogenesis	4/1101	10/18800	0.00184738	0.0145857	0.0110107	BMPR2/TGFB2/EDN1/BMP4	4
670	downregulated.Antt vs VC	Downregulated	Antt vs VC	BP	GO:0042176	Regulation of protein catabolic process	38/1101	395/18800	0.00185186	0.0145993	0.011021	TMTC3/HMGCR/LDLR/RNF217/DACT1/TIMP3/ANXA2/SUFU/UBXN2A/FURIN/SOX9/SMURF2/RNF144A/CDC20/DTL/CYP51A1/PACSIN3/SMAD3/PBK/MYLIP/EGF/BARD1/USP13/FMN2/PRICKLE1/PLK1/FOXF2/EZR/FAM83D/SH3RF2/ASB9/CDK2/NKD1/CAV1/GRIN2A/PLK2/PCSK9/NRG1	38
671	downregulated.Antt vs VC	Downregulated	Antt vs VC	BP	GO:0061180	Mammary gland epithelium development	11/1101	68/18800	0.00187089	0.0147274	0.0111176	HIF1A/PTCH1/IQGAP3/EPHA2/DDR1/ZNF703/CCND1/MSX2/WNT7B/FGFR2/WNT3	11
672	downregulated.Antt vs VC	Downregulated	Antt vs VC	BP	GO:0042326	Negative regulation of phosphorylation	37/1101	382/18800	0.00187578	0.0147439	0.0111301	NCAPG2/EPHB2/CDKN2B/HMGCR/KIRREL1/CALM3/GADD45B/AJUBA/CORO1C/KAT2B/PRR5L/TGFB1/CTDSPL/NF2/HYAL2/DMD/SOCS3/PRKAR2B/CDKN2C/IGFBP3/DBNDD1/HSPB1/PBK/CNKSR3/SLC8A1/NR2F2/SMAD6/SIRPA/PLK1/PTPRJ/SFN/NTF3/PLPP3/GPRC5A/INHBA/CAV1/BMP4	37
673	downregulated.Antt vs VC	Downregulated	Antt vs VC	BP	GO:0045862	Positive regulation of proteolysis	36/1101	369/18800	0.00189602	0.0148808	0.0112335	TMTC3/ROCK2/RNF217/ANXA2/GSN/ANTXR1/FURIN/MYH9/DAPK1/MAPK12/HMGB1/FAS/CCN1/RNF144A/MALT1/CDC20/EGLN3/PACSIN3/SMAD3/BOK/EGF/HIP1/SPON1/UACA/USP13/PRICKLE1/S100A10/PLK1/F2R/NKX3-1/SH3RF2/CCBE1/CCN2/CAV1/GRIN2A/F3	36
674	downregulated.Antt vs VC	Downregulated	Antt vs VC	BP	GO:0051489	Regulation of filopodium assembly	9/1101	49/18800	0.0019297	0.0151227	0.0114161	EPHB2/FNBP1L/AGRN/SRF/FSCN1/DAAM2/TENM2/TGFB3/RIPOR2	9
675	downregulated.Antt vs VC	Downregulated	Antt vs VC	BP	GO:1903524	Positive regulation of blood circulation	8/1101	40/18800	0.00193653	0.0151537	0.0114395	NKX2-5/APLN/ADRA1D/TPM1/CCN2/RGS4/TGFB2/EDN1	8
676	downregulated.Antt vs VC	Downregulated	Antt vs VC	BP	GO:0090596	Sensory organ morphogenesis	28/1101	266/18800	0.00195819	0.0153005	0.0115503	EFEMP1/EPHB2/GDF11/RARG/HIF1A/TBX2/EPHA2/SOX9/GLI3/NECTIN1/CITED2/FAT1/LHX1/SHROOM2/FZD2/BCAR3/PITX2/LRIG3/FOXF2/SIX2/COL8A1/DLX6/FGFR2/INSIG1/PRDM1/DLX5/EDN1/BMP4	28
677	downregulated.Antt vs VC	Downregulated	Antt vs VC	BP	GO:0007589	Body fluid secretion	13/1101	89/18800	0.00197102	0.015378	0.0116088	STAT5B/HIF1A/SOCS2/DDR1/KCNN4/SLC29A1/CCND1/APLN/ADORA1/NPPB/CAV1/OXTR/EDN1	13
678	downregulated.Antt vs VC	Downregulated	Antt vs VC	BP	GO:1903844	Regulation of cellular response to transforming growth factor beta stimulus	17/1101	133/18800	0.00197491	0.0153857	0.0116146	CDKN2B/TGFB1I1/TGFB1/C20orf27/SMURF2/DLX1/CITED2/SMAD3/BAMBI/ZNF703/TGFB3/TGFBR3/SMAD6/NREP/CAV2/THBS1/CAV1	17
679	downregulated.Antt vs VC	Downregulated	Antt vs VC	BP	GO:0045664	Regulation of neuron differentiation	22/1101	192/18800	0.00200473	0.015572	0.0117553	GDF11/HMG20B/ECT2/TGIF2/NOTCH1/CASZ1/SOX9/DLX1/GLI3/NOTCH3/SOCS2/NKX2-5/IRX3/ASPM/DIXDC1/BDNF/NTF3/NREP/TCF4/NTF4/LIN28A/BMP4	22
680	downregulated.Antt vs VC	Downregulated	Antt vs VC	BP	GO:0048839	Inner ear development	22/1101	192/18800	0.00200473	0.015572	0.0117553	EPHB2/MCM2/PDGFA/ATP8B1/TBX2/NOTCH1/SOX9/GLI3/FZD2/HOXA13/BMPER/TGFB3/LRIG3/CCNA2/PDGFRB/DLX6/FGFR2/INSIG1/TGFB2/DLX5/LGR5/BMP4	22
681	downregulated.Antt vs VC	Downregulated	Antt vs VC	BP	GO:2000116	Regulation of cysteine-type endopeptidase activity	25/1101	229/18800	0.00203206	0.0157611	0.011898	CD44/GSN/DAPK1/HMGB1/FAS/CCN1/MALT1/GAS6/DHCR24/CRYAB/EGLN3/SMAD3/BOK/ARL6IP1/HIP1/RPS6KA1/TNFAIP8/UACA/F2R/SFN/NKX3-1/THBS1/CCN2/GRIN2A/F3	25
682	downregulated.Antt vs VC	Downregulated	Antt vs VC	BP	GO:0001938	Positive regulation of endothelial cell proliferation	15/1101	111/18800	0.0020477	0.0158592	0.0119721	NRP2/HMGB2/HIF1A/HMGB1/JCAD/BMPR2/PIK3CD/PDGFB/EGF/APLN/VEGFC/CAV2/FGFBP1/F3/BMP4	15
683	downregulated.Antt vs VC	Downregulated	Antt vs VC	BP	GO:0014068	Positive regulation of phosphatidylinositol 3-kinase signaling	12/1101	79/18800	0.00206597	0.0159539	0.0120435	IGF1R/PRR5L/PDGFA/SOX9/PDGFB/EGF/F2RL1/PDGFC/F2R/PDGFRB/NKX3-1/TGFB2	12
684	downregulated.Antt vs VC	Downregulated	Antt vs VC	BP	GO:0048145	Regulation of fibroblast proliferation	12/1101	79/18800	0.00206597	0.0159539	0.0120435	PAWR/FOSL2/PDGFA/CCNB1/GAS6/CDK6/PDGFB/C1QL4/PDGFC/CCNA2/PDGFRB/E2F1	12
685	downregulated.Antt vs VC	Downregulated	Antt vs VC	BP	GO:0045599	Negative regulation of fat cell differentiation	10/1101	59/18800	0.00207656	0.0160123	0.0120876	TRIO/TGFB1I1/TGFB1/FERMT2/CCDC85B/SMAD3/C1QL4/MSX2/E2F1/INSIG1	10
686	downregulated.Antt vs VC	Downregulated	Antt vs VC	BP	GO:0051385	Response to mineralocorticoid	7/1101	32/18800	0.00214361	0.0164333	0.0124055	CALM3/IGF1R/SGK1/NEFL/CCND1/CCN2/EDN1	7
687	downregulated.Antt vs VC	Downregulated	Antt vs VC	BP	GO:0060674	Placenta blood vessel development	7/1101	32/18800	0.00214361	0.0164333	0.0124055	NSDHL/SOCS3/CCN1/PLCD3/HS6ST1/NR2F2/ITGB8	7
688	downregulated.Antt vs VC	Downregulated	Antt vs VC	BP	GO:0071711	Basement membrane organization	7/1101	32/18800	0.00214361	0.0164333	0.0124055	HMCN1/PHLDB1/FLRT2/COL4A1/PHLDB2/CAV2/CAV1	7
689	downregulated.Antt vs VC	Downregulated	Antt vs VC	BP	GO:0090183	Regulation of kidney development	7/1101	32/18800	0.00214361	0.0164333	0.0124055	SOX9/FOXD1/LHX1/BASP1/SIX2/LGR4/BMP4	7
690	downregulated.Antt vs VC	Downregulated	Antt vs VC	BP	GO:0003181	Atrioventricular valve morphogenesis	6/1101	24/18800	0.00215089	0.0164414	0.0124116	NOTCH1/CCN1/BMPR2/SMAD6/SOX4/TGFB2	6
691	downregulated.Antt vs VC	Downregulated	Antt vs VC	BP	GO:0050820	Positive regulation of coagulation	6/1101	24/18800	0.00215089	0.0164414	0.0124116	TBXA2R/ST3GAL4/SERPINE1/F2R/THBS1/F3	6
692	downregulated.Antt vs VC	Downregulated	Antt vs VC	BP	GO:0001843	Neural tube closure	13/1101	90/18800	0.00218305	0.0166391	0.0125608	VASP/RARG/SUFU/PTCH1/TGFB1/CITED2/FZD2/PRICKLE1/SHROOM3/TEAD2/LHX2/TGFB2/BMP4	13
693	downregulated.Antt vs VC	Downregulated	Antt vs VC	BP	GO:0061097	Regulation of protein tyrosine kinase activity	13/1101	90/18800	0.00218305	0.0166391	0.0125608	NCAPG2/HBEGF/HYAL2/RAP2B/GAS6/PDGFB/EGF/NEDD9/CD24/ADORA1/GPRC5A/CAV1/NRG1	13
694	downregulated.Antt vs VC	Downregulated	Antt vs VC	BP	GO:0106106	Cold-induced thermogenesis	18/1101	146/18800	0.00222306	0.0168952	0.0127542	LPIN1/IGF1R/NOTCH1/SCD/THRA/PLAC8/TLE3/PLCL2/FOXC2/PDGFC/ADCYAP1/ID1/KSR2/ADRB2/CAV1/LGR4/OXTR/DIO2	18
695	downregulated.Antt vs VC	Downregulated	Antt vs VC	BP	GO:0120161	Regulation of cold-induced thermogenesis	18/1101	146/18800	0.00222306	0.0168952	0.0127542	LPIN1/IGF1R/NOTCH1/SCD/THRA/PLAC8/TLE3/PLCL2/FOXC2/PDGFC/ADCYAP1/ID1/KSR2/ADRB2/CAV1/LGR4/OXTR/DIO2	18
696	downregulated.Antt vs VC	Downregulated	Antt vs VC	BP	GO:0010463	Mesenchymal cell proliferation	8/1101	41/18800	0.00228454	0.0172879	0.0130506	PDGFA/TBX2/SOX9/LMNA/NFIB/SIX2/FGFR2/BMP4	8
697	downregulated.Antt vs VC	Downregulated	Antt vs VC	BP	GO:0033574	Response to testosterone	8/1101	41/18800	0.00228454	0.0172879	0.0130506	ROCK2/IGF1R/NASP/TBXA2R/HOXA13/NKX3-1/THBS1/EDN1	8
698	downregulated.Antt vs VC	Downregulated	Antt vs VC	BP	GO:1902742	Apoptotic process involved in development	8/1101	41/18800	0.00228454	0.0172879	0.0130506	PPP2R1B/NOTCH1/CCN1/CRYAB/NKX2-5/FOXC2/XKR5/TGFB2	8
699	downregulated.Antt vs VC	Downregulated	Antt vs VC	BP	GO:0072331	Signal transduction by p53 class mediator	20/1101	170/18800	0.00229859	0.0173693	0.013112	CD44/PPP1R13B/ATAD5/FOXM1/AURKB/PRMT6/SGK1/ANKRD1/GTSE1/BOK/DYRK2/CASP6/SNAI2/BCL3/NUAK1/USP2/E2F1/E2F2/SOX4/PLK2	20
700	downregulated.Antt vs VC	Downregulated	Antt vs VC	BP	GO:0021766	Hippocampus development	12/1101	80/18800	0.00230385	0.0173842	0.0131233	IGF1R/PHLPP2/NF2/SRF/EZH2/DLX1/GLI3/CDK6/NEFL/ATP2B4/KIRREL3/DCLK2	12
701	downregulated.Antt vs VC	Downregulated	Antt vs VC	BP	GO:0000712	Resolution of meiotic recombination intermediates	5/1101	17/18800	0.00233621	0.0176032	0.0132886	TEX11/RMI1/CENPX/TOP2A/SHOC1	5
702	downregulated.Antt vs VC	Downregulated	Antt vs VC	BP	GO:1903670	Regulation of sprouting angiogenesis	10/1101	60/18800	0.00236369	0.0177849	0.0134258	PKM/CEMIP2/JCAD/BMPER/GLUL/RHOJ/E2F2/THBS1/FGF1/CREB3L1	10
703	downregulated.Antt vs VC	Downregulated	Antt vs VC	BP	GO:0003143	Embryonic heart tube morphogenesis	11/1101	70/18800	0.00237408	0.0178123	0.0134465	MICAL2/SUFU/HIF1A/TBX2/NOTCH1/SRF/CITED2/SMAD3/NKX2-5/TEAD2/SOX18	11
704	downregulated.Antt vs VC	Downregulated	Antt vs VC	BP	GO:0051057	Positive regulation of small gtpase mediated signal transduction	11/1101	70/18800	0.00237408	0.0178123	0.0134465	LPAR1/ITPKB/NOTCH1/AUTS2/F2RL1/F2R/KITLG/PDGFRB/SYNPO2L/NRG1/LPAR4	11
705	downregulated.Antt vs VC	Downregulated	Antt vs VC	BP	GO:0001890	Placenta development	18/1101	147/18800	0.00239819	0.0179677	0.0135638	HIF1A/NSDHL/SOCS3/CCN1/BMPR2/PLCD3/PLK4/CITED2/HS6ST1/PDGFB/WNT7B/NR2F2/E2F8/CCNF/FGFR2/ADAM19/ITGB8/PRDM1	18
706	downregulated.Antt vs VC	Downregulated	Antt vs VC	BP	GO:0043254	Regulation of protein-containing complex assembly	38/1101	401/18800	0.00241084	0.0180056	0.0135924	RALB/DBN1/ATF7IP/ASAP1/TRAF2/KIRREL1/VASP/AJUBA/FBLIM1/DACT1/FHOD3/GSN/SPTAN1/TGFB1/PSRC1/EPS8/HMGB1/ADD2/BAIAP2/NIN/PIEZO1/SOX9/FERMT2/FSCN1/THRA/FKBP4/CRYAB/TMOD2/ARHGAP28/NAV3/CARMIL2/CDC42EP3/DAAM2/STMN1/PLEKHG2/SMAD6/KANK1/NRG1	38
707	downregulated.Antt vs VC	Downregulated	Antt vs VC	BP	GO:0032465	Regulation of cytokinesis	13/1101	91/18800	0.00241348	0.0180056	0.0135924	KIF23/CALM3/IGF1R/ECT2/AURKB/KIF20A/PLK4/CIT/CDC14A/CDC25B/PLK1/E2F8/PLK2	13
708	downregulated.Antt vs VC	Downregulated	Antt vs VC	BP	GO:0060606	Tube closure	13/1101	91/18800	0.00241348	0.0180056	0.0135924	VASP/RARG/SUFU/PTCH1/TGFB1/CITED2/FZD2/PRICKLE1/SHROOM3/TEAD2/LHX2/TGFB2/BMP4	13
709	downregulated.Antt vs VC	Downregulated	Antt vs VC	BP	GO:0043405	Regulation of map kinase activity	21/1101	183/18800	0.00245975	0.018325	0.0138335	HMGCR/TRAF2/AJUBA/TGFB1/PDGFA/HYAL2/EZH2/FZD4/PDGFB/EGF/PDGFC/CD24/KITLG/PDGFRB/PTPRJ/NTF3/THBS1/FGF1/CAV1/EDN1/BMP4	21
710	downregulated.Antt vs VC	Downregulated	Antt vs VC	BP	GO:0071496	Cellular response to external stimulus	31/1101	309/18800	0.00247389	0.0184043	0.0138934	SIK2/AXL/RALB/CDKN2B/RXRA/MN1/IGF1R/MAP3K1/FAS/RIPOR1/MAP3K14/PIEZO1/SOX9/SRF/SREBF2/BMPR2/GAS6/ANKRD1/SESN3/KLF10/DCTPP1/PIEZO2/CNN2/SNAI2/NUAK2/NUAK1/GLUL/GAS2L1/KANK2/BRIP1/PCSK9	31
711	downregulated.Antt vs VC	Downregulated	Antt vs VC	BP	GO:0045637	Regulation of myeloid cell differentiation	23/1101	208/18800	0.00255166	0.0189562	0.01431	MEIS2/ITPKB/HMGB2/STAT5B/RARG/HIF1A/TGFB1/H4C12/H4C3/H4C8/PRMT6/CDK6/H4C11/KLF10/H4C14/HMGB3/MITF/H4C15/H4C2/CAMK4/KITLG/INHBA/LRRC17	23
712	downregulated.Antt vs VC	Downregulated	Antt vs VC	BP	GO:0044773	Mitotic dna damage checkpoint signaling	12/1101	81/18800	0.00256361	0.0190117	0.0143519	CLSPN/TICRR/MAP3K20/BLM/GTSE1/FOXN3/DTL/CCND1/CDK1/PLK1/CDK2/PLK2	12
713	downregulated.Antt vs VC	Downregulated	Antt vs VC	BP	GO:0033002	Muscle cell proliferation	25/1101	233/18800	0.00257017	0.0190117	0.0143519	IGF1R/TGFB1/TBX2/HBEGF/NOTCH1/BMPR2/NOTCH3/CITED2/IGFBP3/NKX2-5/PDGFB/FOXC2/APLN/TGFB3/CDK1/TGFBR3/PDGFRB/FGFR2/THBS1/TPM1/S1PR1/CNN1/TGFB2/EDN1/BMP4	25
714	downregulated.Antt vs VC	Downregulated	Antt vs VC	BP	GO:0007080	Mitotic metaphase plate congression	9/1101	51/18800	0.00257352	0.0190117	0.0143519	KIF18A/CENPE/NUF2/PSRC1/CDCA8/CCNB1/AURKB/KIFC1/SPDL1	9
715	downregulated.Antt vs VC	Downregulated	Antt vs VC	BP	GO:2000179	Positive regulation of neural precursor cell proliferation	9/1101	51/18800	0.00257352	0.0190117	0.0143519	HIF1A/NOTCH1/GLI3/LHX1/EGF/ASPM/TOX/VEGFC/LHX2	9
716	downregulated.Antt vs VC	Downregulated	Antt vs VC	BP	GO:0045879	Negative regulation of smoothened signaling pathway	7/1101	33/18800	0.0025853	0.0190454	0.0143773	SUFU/PTCH1/GPR161/HERC4/GLI3/RUNX2/HHIP	7
717	downregulated.Antt vs VC	Downregulated	Antt vs VC	BP	GO:0048566	Embryonic digestive tract development	7/1101	33/18800	0.0025853	0.0190454	0.0143773	GLI3/GLI2/FOXF2/SIX2/FGFR2/SALL1/TGFB2	7
718	downregulated.Antt vs VC	Downregulated	Antt vs VC	BP	GO:0048511	Rhythmic process	30/1101	297/18800	0.00259868	0.0191173	0.0144316	TYRO3/AXL/PCNA/ROCK2/KAT2B/IGF1R/STAT5B/PHLPP1/TIMELESS/ARNTL2/ATF5/EZH2/FZD4/KLF10/DTL/KCNA2/TOP2A/TEF/TGFB3/TYMS/CDK1/ID3/ADORA1/USP2/ID1/PER3/INHBA/LGR4/TGFB2/OXTR	30
719	downregulated.Antt vs VC	Downregulated	Antt vs VC	BP	GO:0030032	Lamellipodium assembly	11/1101	71/18800	0.00266386	0.0195028	0.0147226	ACTR3/AJUBA/ABLIM1/EPHA2/FSCN1/PLCE1/CCDC88A/CARMIL2/AUTS2/VCL/S1PR1	11
720	downregulated.Antt vs VC	Downregulated	Antt vs VC	BP	GO:0031670	Cellular response to nutrient	8/1101	42/18800	0.00267974	0.0195028	0.0147226	CDKN2B/RXRA/MN1/SRF/GAS6/SNAI2/KANK2/BRIP1	8
721	downregulated.Antt vs VC	Downregulated	Antt vs VC	BP	GO:0030865	Cortical cytoskeleton organization	10/1101	61/18800	0.00268181	0.0195028	0.0147226	EPB41L2/EHD2/ROCK2/FHOD3/ECT2/RHOBTB3/WDR1/RHOB/ANLN/EZR	10
722	downregulated.Antt vs VC	Downregulated	Antt vs VC	BP	GO:0003071	Renal system process involved in regulation of systemic arterial blood pressure	6/1101	25/18800	0.0026917	0.0195028	0.0147226	EMP2/GAS6/PDGFB/F2RL1/F2R/ADORA1	6
723	downregulated.Antt vs VC	Downregulated	Antt vs VC	BP	GO:0031639	Plasminogen activation	6/1101	25/18800	0.0026917	0.0195028	0.0147226	ANXA2/DHCR24/PLAT/SERPINE1/S100A10/THBS1	6
724	downregulated.Antt vs VC	Downregulated	Antt vs VC	BP	GO:0033081	Regulation of t cell differentiation in thymus	6/1101	25/18800	0.0026917	0.0195028	0.0147226	TMEM131L/GLI2/CAMK4/TOX/IL7R/BMP4	6
725	downregulated.Antt vs VC	Downregulated	Antt vs VC	BP	GO:0045662	Negative regulation of myoblast differentiation	6/1101	25/18800	0.0026917	0.0195028	0.0147226	TGFB1/NOTCH1/SOX9/ID3/PRICKLE1/BMP4	6
726	downregulated.Antt vs VC	Downregulated	Antt vs VC	BP	GO:0050927	Positive regulation of positive chemotaxis	6/1101	25/18800	0.0026917	0.0195028	0.0147226	SMAD3/F2RL1/VEGFC/NTF3/S1PR1/F3	6
727	downregulated.Antt vs VC	Downregulated	Antt vs VC	BP	GO:0060343	Trabecula formation	6/1101	25/18800	0.0026917	0.0195028	0.0147226	SRF/NKX2-5/FHL2/ADGRG6/MSX2/TGFBR3	6
728	downregulated.Antt vs VC	Downregulated	Antt vs VC	BP	GO:0071459	Protein localization to chromosome, centromeric region	6/1101	25/18800	0.0026917	0.0195028	0.0147226	CENPA/KNL1/AURKB/HASPIN/SPDL1/CDK1	6
729	downregulated.Antt vs VC	Downregulated	Antt vs VC	BP	GO:2000463	Positive regulation of excitatory postsynaptic potential	6/1101	25/18800	0.0026917	0.0195028	0.0147226	NLGN2/BAIAP2/SHANK3/WNT7A/ADRB2/RGS4	6
730	downregulated.Antt vs VC	Downregulated	Antt vs VC	BP	GO:0051656	Establishment of organelle localization	38/1101	404/18800	0.00274125	0.0197925	0.0149413	ACTR3/KIF3C/MYO1E/SDC1/MYO1B/FNBP1L/KIF18A/HIF1A/CENPE/CENPA/SPAG5/MYH9/NUF2/PSRC1/DLGAP5/CDCA8/CCNB1/TCIRG1/NEFH/RIPOR1/AURKB/KIFC1/INCENP/CENPF/NEFL/PIK3CD/LIMK2/ESPL1/SHROOM2/ACTN4/TRIM58/SPDL1/FMN2/PLK1/EZR/FAM83D/MYO7B/MISP	38
731	downregulated.Antt vs VC	Downregulated	Antt vs VC	BP	GO:0002551	Mast cell chemotaxis	4/1101	11/18800	0.00276914	0.0197925	0.0149413	SWAP70/RIN3/PIK3CD/VEGFC	4
732	downregulated.Antt vs VC	Downregulated	Antt vs VC	BP	GO:0003174	Mitral valve development	4/1101	11/18800	0.00276914	0.0197925	0.0149413	NOTCH1/BMPR2/SMAD6/SOX4	4
733	downregulated.Antt vs VC	Downregulated	Antt vs VC	BP	GO:0040015	Negative regulation of multicellular organism growth	4/1101	11/18800	0.00276914	0.0197925	0.0149413	PTCH1/SOCS2/PLAC8/ADRB2	4
734	downregulated.Antt vs VC	Downregulated	Antt vs VC	BP	GO:0048103	Somatic stem cell division	4/1101	11/18800	0.00276914	0.0197925	0.0149413	FZD7/NOTCH1/WNT7A/TGFB2	4
735	downregulated.Antt vs VC	Downregulated	Antt vs VC	BP	GO:0060433	Bronchus development	4/1101	11/18800	0.00276914	0.0197925	0.0149413	SOX9/SRF/WNT7B/BMP4	4
736	downregulated.Antt vs VC	Downregulated	Antt vs VC	BP	GO:0070561	Vitamin d receptor signaling pathway	4/1101	11/18800	0.00276914	0.0197925	0.0149413	RXRA/MN1/SNAI2/KANK2	4
737	downregulated.Antt vs VC	Downregulated	Antt vs VC	BP	GO:0072110	Glomerular mesangial cell proliferation	4/1101	11/18800	0.00276914	0.0197925	0.0149413	PDGFB/SERPINB7/PDGFRB/BMP4	4
738	downregulated.Antt vs VC	Downregulated	Antt vs VC	BP	GO:2000392	Regulation of lamellipodium morphogenesis	4/1101	11/18800	0.00276914	0.0197925	0.0149413	CD44/CORO1C/ARPIN/KANK1	4
739	downregulated.Antt vs VC	Downregulated	Antt vs VC	BP	GO:2000644	Regulation of receptor catabolic process	4/1101	11/18800	0.00276914	0.0197925	0.0149413	ANXA2/FURIN/MYLIP/PCSK9	4
740	downregulated.Antt vs VC	Downregulated	Antt vs VC	BP	GO:1902652	Secondary alcohol metabolic process	18/1101	149/18800	0.00278323	0.0198662	0.014997	HMGCR/LDLR/RXRA/NSDHL/SREBF2/LBR/DHCR24/LSS/ACLY/CYP51A1/EBP/LIMA1/FDFT1/INSIG1/MSMO1/HMGCS1/FGF1/PCSK9	18
741	downregulated.Antt vs VC	Downregulated	Antt vs VC	BP	GO:1901342	Regulation of vasculature development	34/1101	351/18800	0.00279862	0.0199491	0.0150595	PKM/CEMIP2/ROCK2/EMP2/HIF1A/EPHA2/JCAD/DDAH1/PIK3CD/PLXND1/HSPB1/RHOB/FOXC2/TBXA2R/RECK/BMPER/ADGRB2/GLUL/ATP2B4/VEGFC/SERPINE1/ID1/RHOJ/E2F2/CCBE1/NPPB/THBS1/ADAM12/ITGB8/FGF1/CREB3L1/PLK2/TGFB2/F3	34
742	downregulated.Antt vs VC	Downregulated	Antt vs VC	BP	GO:0018209	Peptidyl-serine modification	33/1101	338/18800	0.00282847	0.0201348	0.0151997	CD44/NEK6/CLSPN/ROCK2/GALNT1/RPS6KA4/TGFB1/MAPK12/DMD/AURKB/GAS6/SGK1/MGAT5B/PDGFB/PLCL2/DYRK2/PKN3/RPS6KA1/BCAR3/CNKSR3/CAMK4/ATP2B4/IL24/CDK1/PLK1/CDC7/BDNF/NTF3/CDK2/NTF4/DCLK2/CAV1/PLK2	33
743	downregulated.Antt vs VC	Downregulated	Antt vs VC	BP	GO:0072527	Pyrimidine-containing compound metabolic process	12/1101	82/18800	0.00284671	0.0202373	0.0152771	TK1/UCK2/NME4/DCK/SHMT1/APOBEC3B/APOBEC3C/TET1/CTPS1/DCTPP1/UNG/TYMS	12
744	downregulated.Antt vs VC	Downregulated	Antt vs VC	BP	GO:1903131	Mononuclear cell differentiation	40/1101	433/18800	0.00296885	0.021054	0.0158936	TYRO3/AXL/KLF6/CBFB/ITPKB/STAT5B/MYH9/HMGB1/FZD7/FANCA/TCIRG1/FASN/SRF/EZH2/MALT1/GLI3/GAS6/TNFSF9/CDK6/RUNX2/DOCK2/CLCF1/DOCK10/TMEM131L/HMGB3/PIK3CD/PLCL2/GLI2/F2RL1/BCL3/CAMK4/TOX/PTPRJ/ITGB8/INHBA/PRDM1/SOX4/IL7R/LFNG/BMP4	40
745	downregulated.Antt vs VC	Downregulated	Antt vs VC	BP	GO:0050730	Regulation of peptidyl-tyrosine phosphorylation	27/1101	261/18800	0.00297903	0.021054	0.0158936	NCAPG2/CD44/TGFB1/PDGFA/NF2/HBEGF/HYAL2/SOCS3/CSPG4/RAP2B/GAS6/CLCF1/PDGFB/EGF/NEDD9/PDGFC/CD24/GFRA1/IL24/KITLG/PTPRJ/ADORA1/NTF3/GPRC5A/FGFR3/CAV1/NRG1	27
746	downregulated.Antt vs VC	Downregulated	Antt vs VC	BP	GO:0001736	Establishment of planar polarity	11/1101	72/18800	0.00298152	0.021054	0.0158936	DACT1/FZD7/SMURF2/WDR1/VANGL1/FZD2/WNT7A/PRICKLE1/PRICKLE2/FOXF2/NKD1	11
747	downregulated.Antt vs VC	Downregulated	Antt vs VC	BP	GO:0007164	Establishment of tissue polarity	11/1101	72/18800	0.00298152	0.021054	0.0158936	DACT1/FZD7/SMURF2/WDR1/VANGL1/FZD2/WNT7A/PRICKLE1/PRICKLE2/FOXF2/NKD1	11
748	downregulated.Antt vs VC	Downregulated	Antt vs VC	BP	GO:1901880	Negative regulation of protein depolymerization	11/1101	72/18800	0.00298152	0.021054	0.0158936	SWAP70/GSN/SPTAN1/EPS8/MID1/ADD2/TMOD2/NAV3/CKAP2/CARMIL2/LIMA1	11
749	downregulated.Antt vs VC	Downregulated	Antt vs VC	BP	GO:0043535	Regulation of blood vessel endothelial cell migration	18/1101	150/18800	0.00299429	0.0211159	0.0159404	STARD13/HIF1A/TGFB1/HMGB1/EPHA2/NOTCH1/JCAD/HSPB1/PDGFB/FOXC2/TBXA2R/ATP2B4/VEGFC/RHOJ/THBS1/FGFBP1/PLK2/CARD10	18
750	downregulated.Antt vs VC	Downregulated	Antt vs VC	BP	GO:0030178	Negative regulation of wnt signaling pathway	20/1101	174/18800	0.00301963	0.0212663	0.0160539	JADE1/DACT1/RBMS3/NOTCH1/SOX9/GLI3/FZD4/TLE3/TMEM131L/APCDD1L/NKX2-5/SNAI2/BICC1/NXN/AXIN2/PRICKLE1/ALPK2/TLE4/NKD1/CAV1	20
751	downregulated.Antt vs VC	Downregulated	Antt vs VC	BP	GO:0008016	Regulation of heart contraction	23/1101	211/18800	0.00306097	0.0214935	0.0162254	CALM3/CACNA1C/TBX2/HBEGF/DMD/HCN4/ATP1B1/THRA/GJC1/NKX2-5/IRX3/APLN/SLC8A1/ATP2B4/DES/ADORA1/ADRA1D/TPM1/CCN2/RGS4/CAV1/TGFB2/EDN1	23
752	downregulated.Antt vs VC	Downregulated	Antt vs VC	BP	GO:0003159	Morphogenesis of an endothelium	5/1101	18/18800	0.00308039	0.0214935	0.0162254	STARD13/ADAMTS12/RHOB/FGF1/BMP4	5
753	downregulated.Antt vs VC	Downregulated	Antt vs VC	BP	GO:0051382	Kinetochore assembly	5/1101	18/18800	0.00308039	0.0214935	0.0162254	CENPE/CENPA/DLGAP5/CENPX/CENPF	5
754	downregulated.Antt vs VC	Downregulated	Antt vs VC	BP	GO:0051782	Negative regulation of cell division	5/1101	18/18800	0.00308039	0.0214935	0.0162254	PTCH1/AURKB/BLM/ASPM/E2F8	5
755	downregulated.Antt vs VC	Downregulated	Antt vs VC	BP	GO:0060438	Trachea development	5/1101	18/18800	0.00308039	0.0214935	0.0162254	RARG/SOX9/SRF/WNT7B/BMP4	5
756	downregulated.Antt vs VC	Downregulated	Antt vs VC	BP	GO:0061154	Endothelial tube morphogenesis	5/1101	18/18800	0.00308039	0.0214935	0.0162254	STARD13/ADAMTS12/RHOB/FGF1/BMP4	5
757	downregulated.Antt vs VC	Downregulated	Antt vs VC	BP	GO:0072077	Renal vesicle morphogenesis	5/1101	18/18800	0.00308039	0.0214935	0.0162254	SOX9/LHX1/SIX2/SALL1/BMP4	5
758	downregulated.Antt vs VC	Downregulated	Antt vs VC	BP	GO:0071604	Transforming growth factor beta production	8/1101	43/18800	0.00312635	0.0217855	0.0164458	HIF1A/FURIN/SMAD3/SERPINB7/CD24/THBS1/ITGB8/TGFB2	8
759	downregulated.Antt vs VC	Downregulated	Antt vs VC	BP	GO:0032092	Positive regulation of protein binding	12/1101	83/18800	0.00315465	0.0219248	0.016551	RALB/DACT1/ANXA2/ADD2/BAMBI/PLXND1/PLCL2/SPON1/BDNF/CAV1/LFNG/BMP4	12
760	downregulated.Antt vs VC	Downregulated	Antt vs VC	BP	GO:0060395	Smad protein signal transduction	12/1101	83/18800	0.00315465	0.0219248	0.016551	VIM/GDF11/TGFB1/BMPR2/SMAD3/TGFB3/SMAD9/SMAD6/INHBA/ATOH8/TGFB2/BMP4	12
761	downregulated.Antt vs VC	Downregulated	Antt vs VC	BP	GO:0009799	Specification of symmetry	17/1101	139/18800	0.00316142	0.021943	0.0165647	MICAL2/RTTN/SUFU/HIF1A/TBX2/NOTCH1/SRF/CITED2/SMAD3/NKX2-5/DAAM2/BICC1/PITX2/PKD1L1/ODAD2/SOX18/BMP4	17
762	downregulated.Antt vs VC	Downregulated	Antt vs VC	BP	GO:0051896	Regulation of protein kinase b signaling	21/1101	187/18800	0.00319035	0.0221147	0.0166944	AXL/IGF1R/PHLPP1/TGFB1/PDGFA/HBEGF/EPHA2/HYAL2/FERMT2/GAS6/SESN3/PIK3CD/EGF/HIP1/RASD2/MYORG/PTPRJ/THBS1/NRG1/LIN28A/F3	21
763	downregulated.Antt vs VC	Downregulated	Antt vs VC	BP	GO:0002042	Cell migration involved in sprouting angiogenesis	13/1101	94/18800	0.00322704	0.0223398	0.0168642	STARD13/NOTCH1/JCAD/SRF/FOXC2/TBXA2R/EFNB2/PIK3R3/RHOJ/THBS1/FGFBP1/PLK2/CARD10	13
764	downregulated.Antt vs VC	Downregulated	Antt vs VC	BP	GO:0050680	Negative regulation of epithelial cell proliferation	19/1101	163/18800	0.00323815	0.022358	0.016878	CDKN2B/PTCH1/TGFB1/SOX9/CDK6/SNAI2/NR2F2/NFIB/TGFBR3/EFNB2/SFN/NKX3-1/FGFR2/CAV2/THBS1/CAV1/ATOH8/TGFB2/BMP4	19
765	downregulated.Antt vs VC	Downregulated	Antt vs VC	BP	GO:0099173	Postsynapse organization	19/1101	163/18800	0.00323815	0.022358	0.016878	NRP2/DBN1/EPHB2/IGF1R/NLGN2/ACTN1/ZDHHC12/NEFH/BAIAP2/PDLIM5/ZNF365/SHANK3/DOCK10/NEFL/ACTB/LRFN4/WNT7A/ACTG1/CTNND2	19
766	downregulated.Antt vs VC	Downregulated	Antt vs VC	BP	GO:0018105	Peptidyl-serine phosphorylation	31/1101	315/18800	0.00331089	0.0227177	0.0171495	CD44/NEK6/CLSPN/ROCK2/RPS6KA4/TGFB1/MAPK12/DMD/AURKB/GAS6/SGK1/PDGFB/PLCL2/DYRK2/PKN3/RPS6KA1/BCAR3/CNKSR3/CAMK4/ATP2B4/IL24/CDK1/PLK1/CDC7/BDNF/NTF3/CDK2/NTF4/DCLK2/CAV1/PLK2	31
767	downregulated.Antt vs VC	Downregulated	Antt vs VC	BP	GO:0007368	Determination of left/right symmetry	16/1101	128/18800	0.00331176	0.0227177	0.0171495	MICAL2/RTTN/SUFU/HIF1A/TBX2/NOTCH1/SRF/CITED2/SMAD3/NKX2-5/DAAM2/BICC1/PITX2/PKD1L1/ODAD2/SOX18	16
768	downregulated.Antt vs VC	Downregulated	Antt vs VC	BP	GO:0050714	Positive regulation of protein secretion	16/1101	128/18800	0.00331176	0.0227177	0.0171495	ACSL4/NLGN2/HIF1A/TGFB1/MCU/ANKRD1/SYTL4/KCNN4/F2RL1/RPH3AL/TGFB3/GLUL/VEGFC/EZR/SOX4/TGFB2	16
769	downregulated.Antt vs VC	Downregulated	Antt vs VC	BP	GO:0010954	Positive regulation of protein processing	6/1101	26/18800	0.00332828	0.0227177	0.0171495	ANXA2/GSN/MYH9/SPON1/S100A10/CCBE1	6
770	downregulated.Antt vs VC	Downregulated	Antt vs VC	BP	GO:0031954	Positive regulation of protein autophosphorylation	6/1101	26/18800	0.00332828	0.0227177	0.0171495	CALM3/PDGFA/RAP2B/PDGFB/PDGFC/VEGFC	6
771	downregulated.Antt vs VC	Downregulated	Antt vs VC	BP	GO:0050926	Regulation of positive chemotaxis	6/1101	26/18800	0.00332828	0.0227177	0.0171495	SMAD3/F2RL1/VEGFC/NTF3/S1PR1/F3	6
772	downregulated.Antt vs VC	Downregulated	Antt vs VC	BP	GO:0062009	Secondary palate development	6/1101	26/18800	0.00332828	0.0227177	0.0171495	FZD2/WNT7A/TGFB3/TGFBR3/ITGB8/TGFB2	6
773	downregulated.Antt vs VC	Downregulated	Antt vs VC	BP	GO:0072010	Glomerular epithelium development	6/1101	26/18800	0.00332828	0.0227177	0.0171495	MYO1E/PODXL/BASP1/FOXC2/CD24/BMP4	6
774	downregulated.Antt vs VC	Downregulated	Antt vs VC	BP	GO:0001707	Mesoderm formation	11/1101	73/18800	0.00332895	0.0227177	0.0171495	NF2/EPHA2/SRF/BMPR2/SMAD3/FOXC2/SIX2/FGFR2/INHBA/WNT3/BMP4	11
775	downregulated.Antt vs VC	Downregulated	Antt vs VC	BP	GO:0060071	Wnt signaling pathway, planar cell polarity pathway	9/1101	53/18800	0.00337667	0.022984	0.0173505	DACT1/FZD7/SMURF2/VANGL1/FZD2/WNT7A/PRICKLE1/PRICKLE2/NKD1	9
776	downregulated.Antt vs VC	Downregulated	Antt vs VC	BP	GO:0072132	Mesenchyme morphogenesis	9/1101	53/18800	0.00337667	0.022984	0.0173505	TBX2/NOTCH1/SOX9/SMAD3/FOXC2/SNAI2/MSX2/ACTA2/TGFB2	9
777	downregulated.Antt vs VC	Downregulated	Antt vs VC	BP	GO:0030098	Lymphocyte differentiation	36/1101	382/18800	0.00338134	0.0229862	0.0173522	TYRO3/AXL/KLF6/CBFB/ITPKB/STAT5B/HMGB1/FZD7/FANCA/TCIRG1/SRF/EZH2/MALT1/GLI3/GAS6/TNFSF9/CDK6/RUNX2/DOCK2/CLCF1/DOCK10/TMEM131L/HMGB3/PIK3CD/PLCL2/GLI2/BCL3/CAMK4/TOX/PTPRJ/INHBA/PRDM1/SOX4/IL7R/LFNG/BMP4	36
778	downregulated.Antt vs VC	Downregulated	Antt vs VC	BP	GO:0009612	Response to mechanical stimulus	22/1101	201/18800	0.00354041	0.0240366	0.0181451	MEIS2/IGF1R/GSN/MAP3K1/PTCH1/FAS/DMD/MAP3K14/PIEZO1/SOX9/SHANK3/ANKRD1/CITED2/PIEZO2/CNN2/SLC1A3/SLC8A1/ACTG1/CNTNAP2/PKD1L1/THBS1/EDN1	22
779	downregulated.Antt vs VC	Downregulated	Antt vs VC	BP	GO:0002066	Columnar/cuboidal epithelial cell development	8/1101	44/18800	0.00362872	0.0246045	0.0185738	RARG/HIF1A/FASN/CDK6/TYMS/ROS1/PRDM1/BMP4	8
780	downregulated.Antt vs VC	Downregulated	Antt vs VC	BP	GO:0007095	Mitotic g2 dna damage checkpoint signaling	7/1101	35/18800	0.00367499	0.0248226	0.0187385	CLSPN/TICRR/BLM/FOXN3/DTL/CDK1/PLK1	7
781	downregulated.Antt vs VC	Downregulated	Antt vs VC	BP	GO:0021955	Central nervous system neuron axonogenesis	7/1101	35/18800	0.00367499	0.0248226	0.0187385	EPHB2/NIN/GLI2/PLXNA4/EPHB6/NFIB/CDH11	7
782	downregulated.Antt vs VC	Downregulated	Antt vs VC	BP	GO:1905207	Regulation of cardiocyte differentiation	7/1101	35/18800	0.00367499	0.0248226	0.0187385	TGFB1/FZD7/NKX2-5/EFNB2/PRICKLE1/TGFB2/BMP4	7
783	downregulated.Antt vs VC	Downregulated	Antt vs VC	BP	GO:0051147	Regulation of muscle cell differentiation	18/1101	153/18800	0.00370888	0.0250196	0.0188872	TGFB1/MAPK12/FZD7/PIEZO1/NOTCH1/SRF/EZH2/BMPR2/NKX2-5/PDGFB/EFNB2/RBM24/BDNF/FGFR2/RGS4/NRG1/EDN1/BMP4	18
784	downregulated.Antt vs VC	Downregulated	Antt vs VC	BP	GO:0019722	Calcium-mediated signaling	22/1101	202/18800	0.00375982	0.0253308	0.0191222	CALM3/CACNA1C/LMCD1/DMD/MCU/ATP1B1/PLCE1/FHL2/DYRK2/RCAN3/GRIN2D/PTGFR/SLC8A1/ADGRB2/ATP2B4/ACKR3/PTPRJ/KSR2/GRIN2A/GBP1/NRG1/EDN1	22
785	downregulated.Antt vs VC	Downregulated	Antt vs VC	BP	GO:0007229	Integrin-mediated signaling pathway	14/1101	107/18800	0.00383505	0.0258047	0.0194799	COL16A1/EMP2/BCAR1/MYH9/DST/FERMT2/ZYX/ITGA7/NEDD9/LAMA5/SEMA7A/PLPP3/CCN2/ITGB8	14
786	downregulated.Antt vs VC	Downregulated	Antt vs VC	BP	GO:0045661	Regulation of myoblast differentiation	9/1101	54/18800	0.0038459	0.025812	0.0194854	TGFB1/NOTCH1/SOX9/IGFBP3/ID3/PRICKLE1/RBM24/RIPOR2/BMP4	9
787	downregulated.Antt vs VC	Downregulated	Antt vs VC	BP	GO:0001947	Heart looping	10/1101	64/18800	0.00384591	0.025812	0.0194854	MICAL2/SUFU/HIF1A/TBX2/NOTCH1/SRF/CITED2/SMAD3/NKX2-5/SOX18	10
788	downregulated.Antt vs VC	Downregulated	Antt vs VC	BP	GO:0044774	Mitotic dna integrity checkpoint signaling	12/1101	85/18800	0.00385129	0.0258154	0.019488	CLSPN/TICRR/MAP3K20/BLM/GTSE1/FOXN3/DTL/CCND1/CDK1/PLK1/CDK2/PLK2	12
789	downregulated.Antt vs VC	Downregulated	Antt vs VC	BP	GO:0017015	Regulation of transforming growth factor beta receptor signaling pathway	16/1101	130/18800	0.00386721	0.0258892	0.0195437	CDKN2B/TGFB1I1/TGFB1/C20orf27/SMURF2/CITED2/SMAD3/BAMBI/ZNF703/TGFB3/TGFBR3/SMAD6/NREP/CAV2/THBS1/CAV1	16
790	downregulated.Antt vs VC	Downregulated	Antt vs VC	BP	GO:0051153	Regulation of striated muscle cell differentiation	13/1101	96/18800	0.00388396	0.0259356	0.0195787	TGFB1/FZD7/PIEZO1/NOTCH1/EZH2/NKX2-5/EFNB2/RBM24/BDNF/RGS4/NRG1/EDN1/BMP4	13
791	downregulated.Antt vs VC	Downregulated	Antt vs VC	BP	GO:1902414	Protein localization to cell junction	13/1101	96/18800	0.00388396	0.0259356	0.0195787	NLGN2/MPP4/ZDHHC12/BAIAP2/FERMT2/NECTIN1/ACTB/HSPB1/WNT7A/CGNL1/VCL/ACTG1/GRIN2A	13
792	downregulated.Antt vs VC	Downregulated	Antt vs VC	BP	GO:0045765	Regulation of angiogenesis	33/1101	345/18800	0.00388911	0.0259372	0.0195799	PKM/CEMIP2/ROCK2/EMP2/HIF1A/EPHA2/JCAD/DDAH1/PIK3CD/PLXND1/HSPB1/RHOB/FOXC2/TBXA2R/RECK/BMPER/ADGRB2/GLUL/ATP2B4/VEGFC/SERPINE1/RHOJ/E2F2/CCBE1/NPPB/THBS1/ADAM12/ITGB8/FGF1/CREB3L1/PLK2/TGFB2/F3	33
793	downregulated.Antt vs VC	Downregulated	Antt vs VC	BP	GO:0090090	Negative regulation of canonical wnt signaling pathway	17/1101	142/18800	0.00394669	0.0259624	0.0195989	JADE1/DACT1/RBMS3/NOTCH1/SOX9/GLI3/FZD4/TLE3/TMEM131L/NKX2-5/SNAI2/BICC1/AXIN2/PRICKLE1/TLE4/NKD1/CAV1	17
794	downregulated.Antt vs VC	Downregulated	Antt vs VC	BP	GO:0044771	Meiotic cell cycle phase transition	4/1101	12/18800	0.00396258	0.0259624	0.0195989	CCNB2/CDC25C/CDC25A/CDC25B	4
795	downregulated.Antt vs VC	Downregulated	Antt vs VC	BP	GO:0051255	Spindle midzone assembly	4/1101	12/18800	0.00396258	0.0259624	0.0195989	KIF23/KIF4A/AURKB/INCENP	4
796	downregulated.Antt vs VC	Downregulated	Antt vs VC	BP	GO:0060442	Branching involved in prostate gland morphogenesis	4/1101	12/18800	0.00396258	0.0259624	0.0195989	HOXA13/NKX3-1/FGFR2/BMP4	4
797	downregulated.Antt vs VC	Downregulated	Antt vs VC	BP	GO:0060831	Smoothened signaling pathway involved in dorsal/ventral neural tube patterning	4/1101	12/18800	0.00396258	0.0259624	0.0195989	SUFU/PTCH1/GPR161/GLI3	4
798	downregulated.Antt vs VC	Downregulated	Antt vs VC	BP	GO:0061309	Cardiac neural crest cell development involved in outflow tract morphogenesis	4/1101	12/18800	0.00396258	0.0259624	0.0195989	PITX2/SEMA3C/EDN1/BMP4	4
799	downregulated.Antt vs VC	Downregulated	Antt vs VC	BP	GO:0071372	Cellular response to follicle-stimulating hormone stimulus	4/1101	12/18800	0.00396258	0.0259624	0.0195989	NOTCH1/PLAT/INHBA/EDN1	4
800	downregulated.Antt vs VC	Downregulated	Antt vs VC	BP	GO:0072537	Fibroblast activation	4/1101	12/18800	0.00396258	0.0259624	0.0195989	AKAP12/RPS6KA1/PDGFRB/ACTA2	4
801	downregulated.Antt vs VC	Downregulated	Antt vs VC	BP	GO:1905666	Regulation of protein localization to endosome	4/1101	12/18800	0.00396258	0.0259624	0.0195989	ROCK2/EGF/ANKRD13A/EZR	4
802	downregulated.Antt vs VC	Downregulated	Antt vs VC	BP	GO:0071453	Cellular response to oxygen levels	19/1101	166/18800	0.00396515	0.0259624	0.0195989	ROCK2/AJUBA/HIF1A/FAS/NOTCH1/DDAH1/KCNMB1/EGLN3/CITED2/LMNA/SLC29A1/SLC8A1/CCNA2/FMN2/NKX3-1/E2F1/BRIP1/CAV1/EDN1	19
803	downregulated.Antt vs VC	Downregulated	Antt vs VC	BP	GO:0030050	Vesicle transport along actin filament	5/1101	19/18800	0.00398135	0.0259624	0.0195989	MYO1E/MYO1B/FNBP1L/ACTN4/MYO7B	5
804	downregulated.Antt vs VC	Downregulated	Antt vs VC	BP	GO:0034501	Protein localization to kinetochore	5/1101	19/18800	0.00398135	0.0259624	0.0195989	KNL1/AURKB/HASPIN/SPDL1/CDK1	5
805	downregulated.Antt vs VC	Downregulated	Antt vs VC	BP	GO:0060749	Mammary gland alveolus development	5/1101	19/18800	0.00398135	0.0259624	0.0195989	HIF1A/SOCS2/DDR1/EGF/CCND1	5
806	downregulated.Antt vs VC	Downregulated	Antt vs VC	BP	GO:0061323	Cell proliferation involved in heart morphogenesis	5/1101	19/18800	0.00398135	0.0259624	0.0195989	NOTCH1/SOX9/BMPR2/PITX2/BMP4	5
807	downregulated.Antt vs VC	Downregulated	Antt vs VC	BP	GO:0061377	Mammary gland lobule development	5/1101	19/18800	0.00398135	0.0259624	0.0195989	HIF1A/SOCS2/DDR1/EGF/CCND1	5
808	downregulated.Antt vs VC	Downregulated	Antt vs VC	BP	GO:0072074	Kidney mesenchyme development	5/1101	19/18800	0.00398135	0.0259624	0.0195989	FOXD1/BASP1/PDGFRB/SIX2/BMP4	5
809	downregulated.Antt vs VC	Downregulated	Antt vs VC	BP	GO:0072087	Renal vesicle development	5/1101	19/18800	0.00398135	0.0259624	0.0195989	SOX9/LHX1/SIX2/SALL1/BMP4	5
810	downregulated.Antt vs VC	Downregulated	Antt vs VC	BP	GO:1903083	Protein localization to condensed chromosome	5/1101	19/18800	0.00398135	0.0259624	0.0195989	KNL1/AURKB/HASPIN/SPDL1/CDK1	5
811	downregulated.Antt vs VC	Downregulated	Antt vs VC	BP	GO:0003171	Atrioventricular valve development	6/1101	27/18800	0.00407046	0.0265107	0.0200129	NOTCH1/CCN1/BMPR2/SMAD6/SOX4/TGFB2	6
812	downregulated.Antt vs VC	Downregulated	Antt vs VC	BP	GO:0045685	Regulation of glial cell differentiation	11/1101	75/18800	0.00412096	0.0267735	0.0202113	LDLR/TGFB1/ZNF365/NOTCH1/DLX1/CLCF1/WDR1/DAAM2/CDK1/LIN28A/ZNF488	11
813	downregulated.Antt vs VC	Downregulated	Antt vs VC	BP	GO:0048332	Mesoderm morphogenesis	11/1101	75/18800	0.00412096	0.0267735	0.0202113	NF2/EPHA2/SRF/BMPR2/SMAD3/FOXC2/SIX2/FGFR2/INHBA/WNT3/BMP4	11
814	downregulated.Antt vs VC	Downregulated	Antt vs VC	BP	GO:0007173	Epidermal growth factor receptor signaling pathway	14/1101	108/18800	0.004175	0.0270642	0.0204307	EFEMP1/BCAR1/TGFB1/HBEGF/SOX9/MVB12B/PLCE1/CCDC88A/EGF/HIP1/BCAR3/PTPRJ/ADORA1/GPRC5A	14
815	downregulated.Antt vs VC	Downregulated	Antt vs VC	BP	GO:0043409	Negative regulation of mapk cascade	20/1101	179/18800	0.00417828	0.0270642	0.0204307	EPHB2/HMGCR/DACT1/IGF1R/TIMP3/NF2/HYAL2/FOXM1/MECOM/PBK/F2RL1/C1QL4/CNKSR3/SIRPA/PTPRJ/EZR/SH3RF2/CAV1/GBP1/BMP4	20
816	downregulated.Antt vs VC	Downregulated	Antt vs VC	BP	GO:0010171	Body morphogenesis	8/1101	45/18800	0.00419131	0.0270642	0.0204307	ZNF281/PHLDB1/TGFB3/CRISPLD2/PHLDB2/ARID5B/WNT3/DLX5	8
817	downregulated.Antt vs VC	Downregulated	Antt vs VC	BP	GO:0030835	Negative regulation of actin filament depolymerization	8/1101	45/18800	0.00419131	0.0270642	0.0204307	SWAP70/GSN/SPTAN1/EPS8/ADD2/TMOD2/CARMIL2/LIMA1	8
818	downregulated.Antt vs VC	Downregulated	Antt vs VC	BP	GO:2000273	Positive regulation of signaling receptor activity	8/1101	45/18800	0.00419131	0.0270642	0.0204307	EPHB2/HIF1A/HBEGF/SHANK3/EGF/ADORA1/ADRB2/EDN1	8
819	downregulated.Antt vs VC	Downregulated	Antt vs VC	BP	GO:0071456	Cellular response to hypoxia	17/1101	143/18800	0.00424163	0.0273328	0.0206334	ROCK2/AJUBA/HIF1A/NOTCH1/DDAH1/KCNMB1/EGLN3/CITED2/LMNA/SLC29A1/SLC8A1/CCNA2/FMN2/NKX3-1/E2F1/BRIP1/EDN1	17
820	downregulated.Antt vs VC	Downregulated	Antt vs VC	BP	GO:0033627	Cell adhesion mediated by integrin	12/1101	86/18800	0.00424325	0.0273328	0.0206334	COL16A1/SWAP70/EPHA2/PIEZO1/PODXL/ITGA7/FOXC2/SNAI2/SERPINE1/PLPP3/ITGB8/TGFB2	12
821	downregulated.Antt vs VC	Downregulated	Antt vs VC	BP	GO:0052547	Regulation of peptidase activity	41/1101	456/18800	0.00427312	0.0274916	0.0207533	CD44/ROCK2/CRIM1/TIMP3/ANXA2/GSN/ANTXR1/FURIN/DAPK1/SIMC1/MAPK12/HMGB1/FAS/COL7A1/CCN1/MALT1/GAS6/DHCR24/CRYAB/EGLN3/PTTG1/SMAD3/BOK/ARL6IP1/ANXA8L1/SERPINB7/HIP1/RPS6KA1/ANXA8/RECK/TNFAIP8/UACA/SERPINE1/F2R/SFN/NKX3-1/THBS1/CCN2/CAV1/GRIN2A/F3	41
822	downregulated.Antt vs VC	Downregulated	Antt vs VC	BP	GO:0030858	Positive regulation of epithelial cell differentiation	10/1101	65/18800	0.00431213	0.0277088	0.0209173	CDKN2B/PTCH1/NOTCH1/SOX9/LHX1/CD24/SERPINE1/SFN/ATOH8/BMP4	10
823	downregulated.Antt vs VC	Downregulated	Antt vs VC	BP	GO:1905332	Positive regulation of morphogenesis of an epithelium	7/1101	36/18800	0.00433568	0.0278263	0.021006	SOX9/PIK3CD/LHX1/EGF/WNT5B/LGR4/BMP4	7
824	downregulated.Antt vs VC	Downregulated	Antt vs VC	BP	GO:0001954	Positive regulation of cell-matrix adhesion	9/1101	55/18800	0.00436465	0.0279443	0.0210951	COL16A1/RIN2/EMP2/PLEKHA2/FERMT2/CDK6/SMAD3/S100A10/PTPRJ	9
825	downregulated.Antt vs VC	Downregulated	Antt vs VC	BP	GO:0051653	Spindle localization	9/1101	55/18800	0.00436465	0.0279443	0.0210951	ACTR3/CENPA/MYH9/ESPL1/ASPM/SPDL1/FMN2/PLK1/MISP	9
826	downregulated.Antt vs VC	Downregulated	Antt vs VC	BP	GO:0045927	Positive regulation of growth	26/1101	256/18800	0.00449524	0.0287214	0.0216817	EXTL3/DBN1/TEAD1/STAT5B/WFS1/HDGFL2/TBX2/HBEGF/AGRN/NOTCH1/SRF/BMPR2/BASP1/EXOSC9/RPS6KA1/CDK1/SEMA7A/TGFBR3/SFN/EZR/BDNF/FGFR2/N6AMT1/WNT3/TGFB2/EDN1	26
827	downregulated.Antt vs VC	Downregulated	Antt vs VC	BP	GO:0032874	Positive regulation of stress-activated mapk cascade	16/1101	132/18800	0.0044969	0.0287214	0.0216817	TRAF2/GADD45B/MAPKBP1/HMGB1/MID1/FZD7/F2RL1/DIXDC1/WNT7A/WNT7B/SH3RF2/INAVA/CCN2/TNFRSF19/TGFB2/BMP4	16
828	downregulated.Antt vs VC	Downregulated	Antt vs VC	BP	GO:0032526	Response to retinoic acid	14/1101	109/18800	0.004539	0.0289553	0.0218583	RXRA/RARG/PTCH1/PDGFA/FZD7/TBX2/SOX9/FZD4/WNT7B/PDGFRB/WNT5B/FGFR2/TEAD2/WNT3	14
829	downregulated.Antt vs VC	Downregulated	Antt vs VC	BP	GO:0014065	Phosphatidylinositol 3-kinase signaling	17/1101	144/18800	0.00455443	0.0290187	0.0219061	TYRO3/IGF1R/PRR5L/PDGFA/SOX9/PIK3CD/PDGFB/EGF/F2RL1/PDGFC/INPP5E/F2R/PDGFRB/NKX3-1/IRS1/TGFB2/EDN1	17
830	downregulated.Antt vs VC	Downregulated	Antt vs VC	BP	GO:0072089	Stem cell proliferation	11/1101	76/18800	0.00456961	0.0290803	0.0219527	HMGB2/NF2/FERMT2/MECOM/SNAI2/WNT7B/VEGFC/KITLG/SIX2/SOX18/WNT3	11
831	downregulated.Antt vs VC	Downregulated	Antt vs VC	BP	GO:0009791	Post-embryonic development	12/1101	87/18800	0.00466655	0.0296615	0.0223914	EFEMP1/PPP1R13L/MYO1E/ATF5/LHX1/ALX4/ERCC2/ARID5B/FGFR2/SEMA3C/PRDM1/BMP4	12
832	downregulated.Antt vs VC	Downregulated	Antt vs VC	BP	GO:0072659	Protein localization to plasma membrane	28/1101	283/18800	0.00471648	0.0299428	0.0226038	EHD2/EPHB2/PACS1/ROCK2/STAC/EMP2/RAB15/PTCH1/TGFB1/SLC9A3R2/RAB31/EPHA2/ATP1B1/CACNB3/GAS6/TSPAN14/CCDC88A/ACTB/RAB3B/LAMA5/ATP2B4/ANK1/S100A10/TSPAN15/EZR/PKP3/LYPD1/GBP1	28
833	downregulated.Antt vs VC	Downregulated	Antt vs VC	BP	GO:0038127	Erbb signaling pathway	15/1101	121/18800	0.0047309	0.0299879	0.0226378	EFEMP1/BCAR1/TGFB1/HBEGF/SOX9/MVB12B/PLCE1/CCDC88A/EGF/HIP1/BCAR3/PTPRJ/ADORA1/GPRC5A/NRG1	15
834	downregulated.Antt vs VC	Downregulated	Antt vs VC	BP	GO:0045619	Regulation of lymphocyte differentiation	20/1101	181/18800	0.00473493	0.0299879	0.0226378	AXL/CBFB/ITPKB/STAT5B/HMGB1/FANCA/MALT1/GLI3/GAS6/TNFSF9/TMEM131L/HMGB3/GLI2/CAMK4/TOX/INHBA/PRDM1/SOX4/IL7R/BMP4	20
835	downregulated.Antt vs VC	Downregulated	Antt vs VC	BP	GO:0085029	Extracellular matrix assembly	8/1101	46/18800	0.00481871	0.0304284	0.0229703	ANTXR1/TGFB1/PHLDB1/NOTCH1/SOX9/GAS6/SMAD3/PHLDB2	8
836	downregulated.Antt vs VC	Downregulated	Antt vs VC	BP	GO:0046847	Filopodium assembly	10/1101	66/18800	0.00482177	0.0304284	0.0229703	EPHB2/FNBP1L/AGRN/SRF/FSCN1/DAAM2/TENM2/TGFB3/EZR/RIPOR2	10
837	downregulated.Antt vs VC	Downregulated	Antt vs VC	BP	GO:0060389	Pathway-restricted smad protein phosphorylation	10/1101	66/18800	0.00482177	0.0304284	0.0229703	GDF11/TGFB1/BMPR2/BMPER/TGFB3/TGFBR3/SMAD6/INHBA/TGFB2/BMP4	10
838	downregulated.Antt vs VC	Downregulated	Antt vs VC	BP	GO:0001935	Endothelial cell proliferation	21/1101	194/18800	0.00490468	0.0309147	0.0233374	NRP2/HMGB2/HIF1A/HMGB1/EPHA2/JCAD/BMPR2/PIK3CD/PDGFB/EGF/BMPER/APLN/NR2F2/VEGFC/CAV2/THBS1/CAV1/FGFBP1/ATOH8/F3/BMP4	21
839	downregulated.Antt vs VC	Downregulated	Antt vs VC	BP	GO:0030431	Sleep	6/1101	28/18800	0.00492819	0.0309889	0.0233935	KCNA2/SLC29A1/ADORA1/PER3/GRIN2A/OXTR	6
840	downregulated.Antt vs VC	Downregulated	Antt vs VC	BP	GO:0032801	Receptor catabolic process	6/1101	28/18800	0.00492819	0.0309889	0.0233935	CAPN1/ANXA2/FURIN/TGFB1/MYLIP/PCSK9	6
841	downregulated.Antt vs VC	Downregulated	Antt vs VC	BP	GO:0048016	Inositol phosphate-mediated signaling	9/1101	56/18800	0.00493633	0.0310032	0.0234042	LMCD1/INPP5A/PLCE1/FHL2/DYRK2/ADGRB2/ATP2B4/NRG1/EDN1	9
842	downregulated.Antt vs VC	Downregulated	Antt vs VC	BP	GO:0060231	Mesenchymal to epithelial transition	5/1101	20/18800	0.00505598	0.0316418	0.0238863	FZD7/BASP1/SIX2/SALL1/BMP4	5
843	downregulated.Antt vs VC	Downregulated	Antt vs VC	BP	GO:0070293	Renal absorption	5/1101	20/18800	0.00505598	0.0316418	0.0238863	GSN/HYAL2/GAS6/SGK1/EDN1	5
844	downregulated.Antt vs VC	Downregulated	Antt vs VC	BP	GO:0071371	Cellular response to gonadotropin stimulus	5/1101	20/18800	0.00505598	0.0316418	0.0238863	NOTCH1/PLAT/CCNA2/INHBA/EDN1	5
845	downregulated.Antt vs VC	Downregulated	Antt vs VC	BP	GO:0021510	Spinal cord development	13/1101	99/18800	0.00506816	0.0316431	0.0238873	GDF11/SUFU/PTCH1/MDGA1/NOTCH1/GLI3/NEFL/LHX1/GLI2/DAAM2/ERCC2/PBX3/SOX4	13
846	downregulated.Antt vs VC	Downregulated	Antt vs VC	BP	GO:1990830	Cellular response to leukemia inhibitory factor	13/1101	99/18800	0.00506816	0.0316431	0.0238873	NRP2/RARG/UBXN2A/EPS8/SHMT1/NEFH/SOCS3/FZD4/MYBL2/VEGFC/ARID5B/HELLS/TLE4	13
847	downregulated.Antt vs VC	Downregulated	Antt vs VC	BP	GO:0030279	Negative regulation of ossification	7/1101	37/18800	0.00508229	0.0316564	0.0238973	HIF1A/BCOR/NOTCH1/SOX9/SMAD6/RFLNB/ZNF664-RFLNA	7
848	downregulated.Antt vs VC	Downregulated	Antt vs VC	BP	GO:0070306	Lens fiber cell differentiation	7/1101	37/18800	0.00508229	0.0316564	0.0238973	VIM/NF2/EPHA2/SMAD3/WNT7A/WNT7B/WNT5B	7
849	downregulated.Antt vs VC	Downregulated	Antt vs VC	BP	GO:0045732	Positive regulation of protein catabolic process	24/1101	233/18800	0.00519086	0.0322946	0.0243791	TMTC3/LDLR/RNF217/DACT1/FURIN/SOX9/SMURF2/RNF144A/CDC20/DTL/PACSIN3/MYLIP/EGF/BARD1/USP13/PRICKLE1/PLK1/EZR/SH3RF2/ASB9/NKD1/CAV1/PLK2/PCSK9	24
850	downregulated.Antt vs VC	Downregulated	Antt vs VC	BP	GO:0006352	Dna-templated transcription, initiation	16/1101	134/18800	0.00520793	0.0323246	0.0244018	UBTF/ATF7IP/H4C12/HMGB1/H4C3/SRF/H4C8/THRA/H4C11/H4C14/MITF/CAVIN1/NKX2-5/H4C15/H4C2/E2F2	16
851	downregulated.Antt vs VC	Downregulated	Antt vs VC	BP	GO:0070304	Positive regulation of stress-activated protein kinase signaling cascade	16/1101	134/18800	0.00520793	0.0323246	0.0244018	TRAF2/GADD45B/MAPKBP1/HMGB1/MID1/FZD7/F2RL1/DIXDC1/WNT7A/WNT7B/SH3RF2/INAVA/CCN2/TNFRSF19/TGFB2/BMP4	16
852	downregulated.Antt vs VC	Downregulated	Antt vs VC	BP	GO:0071695	Anatomical structure maturation	25/1101	246/18800	0.00522499	0.0323925	0.024453	AXL/CBFB/GDF11/HIF1A/AGRN/ADAMTS12/RUNX2/EBP/FBXO5/XYLT1/FAM20C/TRIM58/RECK/CDC25B/ERCC2/MSX2/TYMS/RFLNB/CNTNAP2/SOX18/S1PR1/FGFR3/ZNF664-RFLNA/TGFB2/EDN1	25
853	downregulated.Antt vs VC	Downregulated	Antt vs VC	BP	GO:0031532	Actin cytoskeleton reorganization	14/1101	111/18800	0.005344	0.0330914	0.0249806	GSN/ANTXR1/BCAR1/HMCN1/MYH9/EPS8/BAIAP2/MCU/CARMIL2/AUTS2/NEDD9/EZR/NTF3/S1PR1	14
854	downregulated.Antt vs VC	Downregulated	Antt vs VC	BP	GO:0001768	Establishment of t cell polarity	4/1101	13/18800	0.00546091	0.0334235	0.0252313	GSN/MYH9/DOCK2/RIPOR2	4
855	downregulated.Antt vs VC	Downregulated	Antt vs VC	BP	GO:0002087	Regulation of respiratory gaseous exchange by nervous system process	4/1101	13/18800	0.00546091	0.0334235	0.0252313	NLGN2/GLS/PBX3/ADORA1	4
856	downregulated.Antt vs VC	Downregulated	Antt vs VC	BP	GO:0007144	Female meiosis i	4/1101	13/18800	0.00546091	0.0334235	0.0252313	CCNB2/FBXO5/CDC25B/BRME1	4
857	downregulated.Antt vs VC	Downregulated	Antt vs VC	BP	GO:0010002	Cardioblast differentiation	4/1101	13/18800	0.00546091	0.0334235	0.0252313	NKX2-5/PRICKLE1/NRG1/TGFB2	4
858	downregulated.Antt vs VC	Downregulated	Antt vs VC	BP	GO:0010771	Negative regulation of cell morphogenesis involved in differentiation	4/1101	13/18800	0.00546091	0.0334235	0.0252313	CORO1C/ACTN4/KANK1/GBP1	4
859	downregulated.Antt vs VC	Downregulated	Antt vs VC	BP	GO:0032530	Regulation of microvillus organization	4/1101	13/18800	0.00546091	0.0334235	0.0252313	ATP8B1/PODXL/FSCN1/EZR	4
860	downregulated.Antt vs VC	Downregulated	Antt vs VC	BP	GO:0032536	Regulation of cell projection size	4/1101	13/18800	0.00546091	0.0334235	0.0252313	NEFL/WNT7A/WNT7B/EZR	4
861	downregulated.Antt vs VC	Downregulated	Antt vs VC	BP	GO:0035331	Negative regulation of hippo signaling	4/1101	13/18800	0.00546091	0.0334235	0.0252313	AJUBA/CIT/WTIP/WWC1	4
862	downregulated.Antt vs VC	Downregulated	Antt vs VC	BP	GO:1900025	Negative regulation of substrate adhesion-dependent cell spreading	4/1101	13/18800	0.00546091	0.0334235	0.0252313	CORO1C/ACTN4/KANK1/GBP1	4
863	downregulated.Antt vs VC	Downregulated	Antt vs VC	BP	GO:2001053	Regulation of mesenchymal cell apoptotic process	4/1101	13/18800	0.00546091	0.0334235	0.0252313	HIF1A/SOX9/HOXA13/MSX2	4
864	downregulated.Antt vs VC	Downregulated	Antt vs VC	BP	GO:0060047	Heart contraction	25/1101	247/18800	0.00550023	0.0335233	0.0253067	PPP1R13L/CALM3/CACNA1C/GSN/TBX2/HBEGF/DMD/HCN4/ATP1B1/THRA/GJC1/NKX2-5/IRX3/APLN/SLC8A1/ATP2B4/DES/ADORA1/ADRA1D/TPM1/CCN2/RGS4/CAV1/TGFB2/EDN1	25
865	downregulated.Antt vs VC	Downregulated	Antt vs VC	BP	GO:0002244	Hematopoietic progenitor cell differentiation	15/1101	123/18800	0.00551379	0.0335233	0.0253067	TGFB1/ESCO2/HYAL2/NOTCH1/SRF/CDK6/CITED2/TOP2A/ERCC2/ANLN/KITLG/FST/INHBA/SOX4/BMP4	15
866	downregulated.Antt vs VC	Downregulated	Antt vs VC	BP	GO:0031109	Microtubule polymerization or depolymerization	15/1101	123/18800	0.00551379	0.0335233	0.0253067	KIF18A/PSRC1/MID1/NIN/NEDD1/SKA2/FKBP4/CRYAB/NAV3/FBXO5/CKAP2/MAP7D3/STMN1/KIF18B/GAS2L1	15
867	downregulated.Antt vs VC	Downregulated	Antt vs VC	BP	GO:0050919	Negative chemotaxis	8/1101	47/18800	0.0055156	0.0335233	0.0253067	NRP2/PDGFA/FLRT2/PLXNA4/SEMA7A/SEMA3C/UNC5C/NRG1	8
868	downregulated.Antt vs VC	Downregulated	Antt vs VC	BP	GO:0014013	Regulation of gliogenesis	13/1101	100/18800	0.00552164	0.0335233	0.0253067	CDKN2B/LDLR/TGFB1/NF2/ZNF365/NOTCH1/EZH2/DLX1/CLCF1/DAAM2/E2F1/LIN28A/ZNF488	13
869	downregulated.Antt vs VC	Downregulated	Antt vs VC	BP	GO:1901992	Positive regulation of mitotic cell cycle phase transition	13/1101	100/18800	0.00552164	0.0335233	0.0253067	DLGAP5/CCNB1/CDC25C/UBE2C/DTL/FBXO5/ESPL1/CDC25A/CDC25B/CCND1/RRM2/CDK1/CDC7	13
870	downregulated.Antt vs VC	Downregulated	Antt vs VC	BP	GO:1990823	Response to leukemia inhibitory factor	13/1101	100/18800	0.00552164	0.0335233	0.0253067	NRP2/RARG/UBXN2A/EPS8/SHMT1/NEFH/SOCS3/FZD4/MYBL2/VEGFC/ARID5B/HELLS/TLE4	13
871	downregulated.Antt vs VC	Downregulated	Antt vs VC	BP	GO:1990845	Adaptive thermogenesis	18/1101	159/18800	0.00556339	0.0335901	0.0253571	LPIN1/IGF1R/NOTCH1/SCD/THRA/PLAC8/TLE3/PLCL2/FOXC2/PDGFC/ADCYAP1/ID1/KSR2/ADRB2/CAV1/LGR4/OXTR/DIO2	18
872	downregulated.Antt vs VC	Downregulated	Antt vs VC	BP	GO:0042306	Regulation of protein import into nucleus	9/1101	57/18800	0.00556443	0.0335901	0.0253571	SUFU/ECT2/TGFB1/HYAL2/GLI3/MDFIC/SMAD3/CDK1/BMP4	9
873	downregulated.Antt vs VC	Downregulated	Antt vs VC	BP	GO:0043551	Regulation of phosphatidylinositol 3-kinase activity	9/1101	57/18800	0.00556443	0.0335901	0.0253571	TGFB1/SOCS6/SOCS3/SOCS2/PDGFB/PIK3R3/PDGFRB/IRS1/FGFR3	9
874	downregulated.Antt vs VC	Downregulated	Antt vs VC	BP	GO:0060350	Endochondral bone morphogenesis	9/1101	57/18800	0.00556443	0.0335901	0.0253571	ANXA6/RARG/SOX9/BMPR2/RUNX2/AXIN2/FGFR3/DLX5/BMP4	9
875	downregulated.Antt vs VC	Downregulated	Antt vs VC	BP	GO:0090175	Regulation of establishment of planar polarity	9/1101	57/18800	0.00556443	0.0335901	0.0253571	DACT1/FZD7/SMURF2/VANGL1/FZD2/WNT7A/PRICKLE1/PRICKLE2/NKD1	9
876	downregulated.Antt vs VC	Downregulated	Antt vs VC	BP	GO:0007422	Peripheral nervous system development	11/1101	78/18800	0.00558279	0.0336624	0.0254117	NEFH/SLC5A3/CITED2/ADGRG6/PLXNA4/ADGRB2/CDK1/BDNF/NTF3/NTF4/NRG1	11
877	downregulated.Antt vs VC	Downregulated	Antt vs VC	BP	GO:0010464	Regulation of mesenchymal cell proliferation	6/1101	29/18800	0.00591148	0.035442	0.0267551	PDGFA/SOX9/LMNA/NFIB/FGFR2/BMP4	6
878	downregulated.Antt vs VC	Downregulated	Antt vs VC	BP	GO:0030212	Hyaluronan metabolic process	6/1101	29/18800	0.00591148	0.035442	0.0267551	CD44/CEMIP2/TGFB1/HYAL2/PDGFB/EGF	6
879	downregulated.Antt vs VC	Downregulated	Antt vs VC	BP	GO:0070977	Bone maturation	6/1101	29/18800	0.00591148	0.035442	0.0267551	ADAMTS12/EBP/XYLT1/RFLNB/FGFR3/ZNF664-RFLNA	6
880	downregulated.Antt vs VC	Downregulated	Antt vs VC	BP	GO:0097421	Liver regeneration	6/1101	29/18800	0.00591148	0.035442	0.0267551	PCNA/PTCH1/EZH2/GLI3/CCND1/TYMS	6
881	downregulated.Antt vs VC	Downregulated	Antt vs VC	BP	GO:0099068	Postsynapse assembly	6/1101	29/18800	0.00591148	0.035442	0.0267551	EPHB2/NLGN2/ZDHHC12/SHANK3/LRFN4/WNT7A	6
882	downregulated.Antt vs VC	Downregulated	Antt vs VC	BP	GO:0040036	Regulation of fibroblast growth factor receptor signaling pathway	7/1101	38/18800	0.00592144	0.0354615	0.0267698	RUNX2/FAM20C/APLN/THBS1/FGFBP1/CREB3L1/HHIP	7
883	downregulated.Antt vs VC	Downregulated	Antt vs VC	BP	GO:0002262	Myeloid cell homeostasis	18/1101	160/18800	0.00593577	0.0355071	0.0268042	NCAPG2/AXL/ITPKB/HMGB2/STAT5B/HIF1A/HMGB1/SRF/THRA/CDK6/CITED2/PIK3CD/TRIM58/ERCC2/TGFBR3/KITLG/INHBA/BMP4	18
884	downregulated.Antt vs VC	Downregulated	Antt vs VC	BP	GO:0043627	Response to estrogen	10/1101	68/18800	0.0059821	0.0357033	0.0269523	GLI3/CITED2/CCND1/WNT7A/TGFB3/CD24/SMAD6/PDGFRB/TNFRSF11B/CAV1	10
885	downregulated.Antt vs VC	Downregulated	Antt vs VC	BP	GO:0061371	Determination of heart left/right asymmetry	10/1101	68/18800	0.0059821	0.0357033	0.0269523	MICAL2/SUFU/HIF1A/TBX2/NOTCH1/SRF/CITED2/SMAD3/NKX2-5/SOX18	10
886	downregulated.Antt vs VC	Downregulated	Antt vs VC	BP	GO:0048638	Regulation of developmental growth	31/1101	329/18800	0.00623932	0.0371494	0.028044	DBN1/GAMT/STAT5B/PTCH1/TBX2/AGRN/NOTCH1/SRF/BMPR2/SOCS2/PLAC8/CITED2/BASP1/NKX2-5/FOXC2/PLXNA4/CDK1/SEMA7A/TGFBR3/EZR/BDNF/WWC1/FGFR2/ADRB2/SEMA3C/RGS4/NKD1/FGFR3/WNT3/EDN1/BMP4	31
887	downregulated.Antt vs VC	Downregulated	Antt vs VC	BP	GO:0042733	Embryonic digit morphogenesis	9/1101	58/18800	0.00625252	0.0371494	0.028044	MAP3K20/TBX2/NOTCH1/GLI3/ALX4/WNT7A/MSX2/SALL1/BMP4	9
888	downregulated.Antt vs VC	Downregulated	Antt vs VC	BP	GO:0060038	Cardiac muscle cell proliferation	9/1101	58/18800	0.00625252	0.0371494	0.028044	TBX2/NOTCH1/CITED2/NKX2-5/FOXC2/CDK1/TGFBR3/FGFR2/TGFB2	9
889	downregulated.Antt vs VC	Downregulated	Antt vs VC	BP	GO:0060997	Dendritic spine morphogenesis	9/1101	58/18800	0.00625252	0.0371494	0.028044	DBN1/EPHB2/BAIAP2/PDLIM5/ZNF365/SHANK3/DOCK10/WNT7A/CTNND2	9
890	downregulated.Antt vs VC	Downregulated	Antt vs VC	BP	GO:0033628	Regulation of cell adhesion mediated by integrin	8/1101	48/18800	0.00628671	0.0371791	0.0280664	SWAP70/EPHA2/PIEZO1/PODXL/FOXC2/SNAI2/SERPINE1/TGFB2	8
891	downregulated.Antt vs VC	Downregulated	Antt vs VC	BP	GO:0044818	Mitotic g2/m transition checkpoint	8/1101	48/18800	0.00628671	0.0371791	0.0280664	CLSPN/TICRR/BLM/FOXN3/DTL/NABP1/CDK1/PLK1	8
892	downregulated.Antt vs VC	Downregulated	Antt vs VC	BP	GO:0003085	Negative regulation of systemic arterial blood pressure	5/1101	21/18800	0.00632087	0.0371791	0.0280664	BMPR2/ARHGAP42/ADORA1/ADRB2/NPPB	5
893	downregulated.Antt vs VC	Downregulated	Antt vs VC	BP	GO:0003177	Pulmonary valve development	5/1101	21/18800	0.00632087	0.0371791	0.0280664	NOTCH1/BMPR2/SMAD6/TGFB2/BMP4	5
894	downregulated.Antt vs VC	Downregulated	Antt vs VC	BP	GO:0030502	Negative regulation of bone mineralization	5/1101	21/18800	0.00632087	0.0371791	0.0280664	HIF1A/BCOR/SOX9/RFLNB/ZNF664-RFLNA	5
895	downregulated.Antt vs VC	Downregulated	Antt vs VC	BP	GO:0090189	Regulation of branching involved in ureteric bud morphogenesis	5/1101	21/18800	0.00632087	0.0371791	0.0280664	SOX9/LHX1/SIX2/LGR4/BMP4	5
896	downregulated.Antt vs VC	Downregulated	Antt vs VC	BP	GO:0099515	Actin filament-based transport	5/1101	21/18800	0.00632087	0.0371791	0.0280664	MYO1E/MYO1B/FNBP1L/ACTN4/MYO7B	5
897	downregulated.Antt vs VC	Downregulated	Antt vs VC	BP	GO:1905209	Positive regulation of cardiocyte differentiation	5/1101	21/18800	0.00632087	0.0371791	0.0280664	TGFB1/NKX2-5/EFNB2/TGFB2/BMP4	5
898	downregulated.Antt vs VC	Downregulated	Antt vs VC	BP	GO:2000773	Negative regulation of cellular senescence	5/1101	21/18800	0.00632087	0.0371791	0.0280664	TBX2/RBL1/CDK6/FBXO5/PLK2	5
899	downregulated.Antt vs VC	Downregulated	Antt vs VC	BP	GO:0043244	Regulation of protein-containing complex disassembly	15/1101	125/18800	0.00639813	0.0375499	0.0283463	IGF1R/SWAP70/GSN/SPTAN1/EPS8/MID1/ADD2/TMOD2/WDR1/NAV3/CKAP2/CARMIL2/F2RL1/LIMA1/ADRB2	15
900	downregulated.Antt vs VC	Downregulated	Antt vs VC	BP	GO:0043280	Positive regulation of cysteine-type endopeptidase activity involved in apoptotic process	15/1101	125/18800	0.00639813	0.0375499	0.0283463	GSN/DAPK1/HMGB1/FAS/CCN1/MALT1/EGLN3/SMAD3/BOK/HIP1/UACA/F2R/NKX3-1/CCN2/F3	15
901	downregulated.Antt vs VC	Downregulated	Antt vs VC	BP	GO:0048771	Tissue remodeling	19/1101	174/18800	0.00658671	0.0386138	0.0291494	AXL/CAPN1/ROCK2/HIF1A/TGFB1/EPHA2/TCIRG1/CSPG4/BMPR2/MITF/FOXC2/TGFB3/F2R/ADRB2/SEMA3C/S1PR1/TNFRSF11B/CAV1/LGR4	19
902	downregulated.Antt vs VC	Downregulated	Antt vs VC	BP	GO:0051258	Protein polymerization	27/1101	277/18800	0.00663344	0.0388302	0.0293128	DBN1/KIRREL1/VASP/FHOD3/GSN/SPTAN1/PSRC1/EPS8/ADD2/BAIAP2/NIN/NEDD1/FKBP4/UBE2C/TMOD2/ARHGAP28/NEFL/NAV3/FBXO5/CARMIL2/CDC42EP3/DAAM2/FHDC1/MAP7D3/STMN1/PLEKHG2/KANK1	27
903	downregulated.Antt vs VC	Downregulated	Antt vs VC	BP	GO:0043550	Regulation of lipid kinase activity	10/1101	69/18800	0.00663833	0.0388302	0.0293128	TGFB1/SOCS6/SOCS3/RBL1/SOCS2/PDGFB/PIK3R3/PDGFRB/IRS1/FGFR3	10
904	downregulated.Antt vs VC	Downregulated	Antt vs VC	BP	GO:0060996	Dendritic spine development	12/1101	91/18800	0.00670832	0.0391962	0.0295891	DBN1/EPHB2/IQSEC1/ASAP1/NLGN2/BAIAP2/PDLIM5/ZNF365/SHANK3/DOCK10/WNT7A/CTNND2	12
905	downregulated.Antt vs VC	Downregulated	Antt vs VC	BP	GO:0009855	Determination of bilateral symmetry	16/1101	138/18800	0.00690401	0.040295	0.0304186	MICAL2/RTTN/SUFU/HIF1A/TBX2/NOTCH1/SRF/CITED2/SMAD3/NKX2-5/DAAM2/BICC1/PITX2/PKD1L1/ODAD2/SOX18	16
906	downregulated.Antt vs VC	Downregulated	Antt vs VC	BP	GO:0070252	Actin-mediated cell contraction	13/1101	103/18800	0.00707938	0.0412729	0.0311568	EPDR1/CACNA1C/GSN/EMP2/LIMCH1/HCN4/MYH2/GJC1/FRMD6/ADORA1/TPM1/ACTA2/CAV1	13
907	downregulated.Antt vs VC	Downregulated	Antt vs VC	BP	GO:2000772	Regulation of cellular senescence	8/1101	49/18800	0.00713686	0.0415622	0.0313752	NEK6/PAWR/TBX2/RBL1/CDK6/FBXO5/NUAK1/PLK2	8
908	downregulated.Antt vs VC	Downregulated	Antt vs VC	BP	GO:0031099	Regeneration	20/1101	188/18800	0.00718589	0.0418016	0.031556	AXL/PCNA/LPIN1/DHFR/IGF1R/PTCH1/HDGFL2/FZD7/NOTCH1/EZH2/GLI3/GAS6/NEFL/CCND1/WNT7A/TYMS/CCNA2/CDK1/TGFBR3/NREP	20
909	downregulated.Antt vs VC	Downregulated	Antt vs VC	BP	GO:0001767	Establishment of lymphocyte polarity	4/1101	14/18800	0.007295	0.0418828	0.0316172	GSN/MYH9/DOCK2/RIPOR2	4
910	downregulated.Antt vs VC	Downregulated	Antt vs VC	BP	GO:0003207	Cardiac chamber formation	4/1101	14/18800	0.007295	0.0418828	0.0316172	TBX2/NOTCH1/NKX2-5/SOX4	4
911	downregulated.Antt vs VC	Downregulated	Antt vs VC	BP	GO:0003222	Ventricular trabecula myocardium morphogenesis	4/1101	14/18800	0.007295	0.0418828	0.0316172	NOTCH1/NKX2-5/NRG1/TGFB2	4
912	downregulated.Antt vs VC	Downregulated	Antt vs VC	BP	GO:0007171	Activation of transmembrane receptor protein tyrosine kinase activity	4/1101	14/18800	0.007295	0.0418828	0.0316172	EGF/PDGFC/ADRB2/NRG1	4
913	downregulated.Antt vs VC	Downregulated	Antt vs VC	BP	GO:0021554	Optic nerve development	4/1101	14/18800	0.007295	0.0418828	0.0316172	EPHB2/TCIRG1/GLI3/KCNA2	4
914	downregulated.Antt vs VC	Downregulated	Antt vs VC	BP	GO:0035791	Platelet-derived growth factor receptor-beta signaling pathway	4/1101	14/18800	0.007295	0.0418828	0.0316172	PDGFA/PDGFB/HIP1/PDGFRB	4
915	downregulated.Antt vs VC	Downregulated	Antt vs VC	BP	GO:0045059	Positive thymic t cell selection	4/1101	14/18800	0.007295	0.0418828	0.0316172	ITPKB/SRF/DOCK2/TOX	4
916	downregulated.Antt vs VC	Downregulated	Antt vs VC	BP	GO:0051764	Actin crosslink formation	4/1101	14/18800	0.007295	0.0418828	0.0316172	EPS8/BAIAP2/MARCKS/GAS2L1	4
917	downregulated.Antt vs VC	Downregulated	Antt vs VC	BP	GO:0055012	Ventricular cardiac muscle cell differentiation	4/1101	14/18800	0.007295	0.0418828	0.0316172	LMNA/NKX2-5/FHL2/CDK1	4
918	downregulated.Antt vs VC	Downregulated	Antt vs VC	BP	GO:0070986	Left/right axis specification	4/1101	14/18800	0.007295	0.0418828	0.0316172	NOTCH1/CITED2/PITX2/PKD1L1	4
919	downregulated.Antt vs VC	Downregulated	Antt vs VC	BP	GO:1901722	Regulation of cell proliferation involved in kidney development	4/1101	14/18800	0.007295	0.0418828	0.0316172	PDGFB/SERPINB7/LIN28A/BMP4	4
920	downregulated.Antt vs VC	Downregulated	Antt vs VC	BP	GO:1902969	Mitotic dna replication	4/1101	14/18800	0.007295	0.0418828	0.0316172	MCM3/MCM2/GINS1/RAD51	4
921	downregulated.Antt vs VC	Downregulated	Antt vs VC	BP	GO:0036294	Cellular response to decreased oxygen levels	17/1101	151/18800	0.0073128	0.0419295	0.0316524	ROCK2/AJUBA/HIF1A/NOTCH1/DDAH1/KCNMB1/EGLN3/CITED2/LMNA/SLC29A1/SLC8A1/CCNA2/FMN2/NKX3-1/E2F1/BRIP1/EDN1	17
922	downregulated.Antt vs VC	Downregulated	Antt vs VC	BP	GO:0032271	Regulation of protein polymerization	21/1101	201/18800	0.007319	0.0419295	0.0316524	DBN1/KIRREL1/VASP/FHOD3/GSN/SPTAN1/PSRC1/EPS8/ADD2/BAIAP2/NIN/FKBP4/TMOD2/ARHGAP28/NAV3/CARMIL2/CDC42EP3/DAAM2/STMN1/PLEKHG2/KANK1	21
923	downregulated.Antt vs VC	Downregulated	Antt vs VC	BP	GO:0042698	Ovulation cycle	10/1101	70/18800	0.00734904	0.0420559	0.0317479	TYRO3/AXL/PCNA/IGF1R/STAT5B/FZD4/TGFB3/INHBA/TGFB2/OXTR	10
924	downregulated.Antt vs VC	Downregulated	Antt vs VC	BP	GO:0030833	Regulation of actin filament polymerization	16/1101	139/18800	0.00739085	0.0422494	0.031894	DBN1/KIRREL1/VASP/FHOD3/GSN/SPTAN1/EPS8/ADD2/BAIAP2/TMOD2/ARHGAP28/CARMIL2/CDC42EP3/DAAM2/PLEKHG2/KANK1	16
925	downregulated.Antt vs VC	Downregulated	Antt vs VC	BP	GO:0046822	Regulation of nucleocytoplasmic transport	13/1101	104/18800	0.00766961	0.0437955	0.0330611	RANGAP1/SUFU/ECT2/TGFB1/HYAL2/GLI3/GAS6/MDFIC/SMAD3/BARD1/CDK1/SFN/BMP4	13
926	downregulated.Antt vs VC	Downregulated	Antt vs VC	BP	GO:0021904	Dorsal/ventral neural tube patterning	5/1101	22/18800	0.00779219	0.0443393	0.0334716	SUFU/PTCH1/GPR161/GLI3/BMP4	5
927	downregulated.Antt vs VC	Downregulated	Antt vs VC	BP	GO:0045061	Thymic t cell selection	5/1101	22/18800	0.00779219	0.0443393	0.0334716	ITPKB/SRF/GLI3/DOCK2/TOX	5
928	downregulated.Antt vs VC	Downregulated	Antt vs VC	BP	GO:0060972	Left/right pattern formation	5/1101	22/18800	0.00779219	0.0443393	0.0334716	NOTCH1/CITED2/NKX2-5/PITX2/PKD1L1	5
929	downregulated.Antt vs VC	Downregulated	Antt vs VC	BP	GO:0070507	Regulation of microtubule cytoskeleton organization	17/1101	152/18800	0.00779841	0.0443393	0.0334716	TACC3/KIF18A/SPAG5/PSRC1/MID1/PHLDB1/NIN/SKA2/FKBP4/NAV3/CKAP2/GNAI1/DIXDC1/STMN1/PHLDB2/PLK1/GAS2L1	17
930	downregulated.Antt vs VC	Downregulated	Antt vs VC	BP	GO:0001659	Temperature homeostasis	19/1101	177/18800	0.00787633	0.0447342	0.0337697	LPIN1/IGF1R/NOTCH1/SCD/THRA/PLAC8/TLE3/PLCL2/FOXC2/PDGFC/ADCYAP1/ADORA1/ID1/KSR2/ADRB2/CAV1/LGR4/OXTR/DIO2	19
931	downregulated.Antt vs VC	Downregulated	Antt vs VC	BP	GO:0030866	Cortical actin cytoskeleton organization	7/1101	40/18800	0.00790416	0.0447959	0.0338163	EPB41L2/EHD2/ROCK2/FHOD3/ECT2/ANLN/EZR	7
932	downregulated.Antt vs VC	Downregulated	Antt vs VC	BP	GO:0034331	Cell junction maintenance	7/1101	40/18800	0.00790416	0.0447959	0.0338163	KIRREL1/NLGN2/FERMT2/F2RL1/PLEKHA7/F2R/INAVA	7
933	downregulated.Antt vs VC	Downregulated	Antt vs VC	BP	GO:0021872	Forebrain generation of neurons	8/1101	50/18800	0.00807089	0.0454967	0.0343454	NRP2/DLX1/GLI3/SHANK3/ASPM/FGFR2/DCLK2/INHBA	8
934	downregulated.Antt vs VC	Downregulated	Antt vs VC	BP	GO:0032873	Negative regulation of stress-activated mapk cascade	8/1101	50/18800	0.00807089	0.0454967	0.0343454	DACT1/FOXM1/MECOM/PBK/F2RL1/SIRPA/EZR/SH3RF2	8
935	downregulated.Antt vs VC	Downregulated	Antt vs VC	BP	GO:0060425	Lung morphogenesis	8/1101	50/18800	0.00807089	0.0454967	0.0343454	TBX2/SOX9/SRF/WNT7B/NFIB/FGFR2/HHIP/BMP4	8
936	downregulated.Antt vs VC	Downregulated	Antt vs VC	BP	GO:0070303	Negative regulation of stress-activated protein kinase signaling cascade	8/1101	50/18800	0.00807089	0.0454967	0.0343454	DACT1/FOXM1/MECOM/PBK/F2RL1/SIRPA/EZR/SH3RF2	8
937	downregulated.Antt vs VC	Downregulated	Antt vs VC	BP	GO:2000107	Negative regulation of leukocyte apoptotic process	8/1101	50/18800	0.00807089	0.0454967	0.0343454	AXL/ITPKB/HIF1A/AURKB/GAS6/KITLG/IL7R/BMP4	8
938	downregulated.Antt vs VC	Downregulated	Antt vs VC	BP	GO:0043242	Negative regulation of protein-containing complex disassembly	11/1101	82/18800	0.00813471	0.0458076	0.03458	SWAP70/GSN/SPTAN1/EPS8/MID1/ADD2/TMOD2/NAV3/CKAP2/CARMIL2/LIMA1	11
939	downregulated.Antt vs VC	Downregulated	Antt vs VC	BP	GO:0032148	Activation of protein kinase b activity	6/1101	31/18800	0.00829456	0.0464601	0.0350726	GAS6/CCDC88A/PDGFB/NTF3/FGF1/NRG1	6
940	downregulated.Antt vs VC	Downregulated	Antt vs VC	BP	GO:0061311	Cell surface receptor signaling pathway involved in heart development	6/1101	31/18800	0.00829456	0.0464601	0.0350726	TGFB1/NOTCH1/SNAI2/MSX2/ALPK2/BMP4	6
941	downregulated.Antt vs VC	Downregulated	Antt vs VC	BP	GO:0071295	Cellular response to vitamin	6/1101	31/18800	0.00829456	0.0464601	0.0350726	RXRA/MN1/GAS6/SNAI2/KANK2/BRIP1	6
942	downregulated.Antt vs VC	Downregulated	Antt vs VC	BP	GO:0150117	Positive regulation of cell-substrate junction organization	6/1101	31/18800	0.00829456	0.0464601	0.0350726	COL16A1/IQSEC1/FERMT2/SMAD3/S100A10/PTPRJ	6
943	downregulated.Antt vs VC	Downregulated	Antt vs VC	BP	GO:1900027	Regulation of ruffle assembly	6/1101	31/18800	0.00829456	0.0464601	0.0350726	CORO1C/EPS8/EPS8L2/CARMIL2/KANK1/CAV1	6
944	downregulated.Antt vs VC	Downregulated	Antt vs VC	BP	GO:0001936	Regulation of endothelial cell proliferation	19/1101	178/18800	0.00834898	0.0467154	0.0352653	NRP2/HMGB2/HIF1A/HMGB1/JCAD/BMPR2/PIK3CD/PDGFB/EGF/APLN/NR2F2/VEGFC/CAV2/THBS1/CAV1/FGFBP1/ATOH8/F3/BMP4	19
945	downregulated.Antt vs VC	Downregulated	Antt vs VC	BP	GO:0032411	Positive regulation of transporter activity	14/1101	117/18800	0.00846756	0.0473287	0.0357283	EPHB2/RXRA/CALM3/STAC/DMD/ATP1B1/CACNB3/SHANK3/SGK1/ACTN4/CNKSR3/ADRB2/JPH2/EDN1	14
946	downregulated.Antt vs VC	Downregulated	Antt vs VC	BP	GO:0043112	Receptor metabolic process	9/1101	61/18800	0.00871294	0.0485974	0.0366861	CAPN1/LDLR/ANXA2/FURIN/TGFB1/MYLIP/PHETA1/PCSK9/NRG1	9
947	downregulated.Antt vs VC	Downregulated	Antt vs VC	BP	GO:1904589	Regulation of protein import	9/1101	61/18800	0.00871294	0.0485974	0.0366861	SUFU/ECT2/TGFB1/HYAL2/GLI3/MDFIC/SMAD3/CDK1/BMP4	9
948	downregulated.Antt vs VC	Downregulated	Antt vs VC	BP	GO:0051348	Negative regulation of transferase activity	26/1101	270/18800	0.0088641	0.0493884	0.0372832	NCAPG2/EPHB2/CDKN2B/HMGCR/BUB1B/GADD45B/AJUBA/CORO1C/KAT2B/NF2/HYAL2/PRKAR2B/CDC20/CDKN2C/FBXO5/DBNDD1/HSPB1/PIF1/SLC8A1/NR2F2/PLK1/PTPRJ/SFN/GPRC5A/CAV1/BMP4	26
949	downregulated.Antt vs VC	Downregulated	Antt vs VC	BP	GO:0003015	Heart process	25/1101	257/18800	0.00897548	0.0499563	0.0377118	PPP1R13L/CALM3/CACNA1C/GSN/TBX2/HBEGF/DMD/HCN4/ATP1B1/THRA/GJC1/NKX2-5/IRX3/APLN/SLC8A1/ATP2B4/DES/ADORA1/ADRA1D/TPM1/CCN2/RGS4/CAV1/TGFB2/EDN1	25
950	downregulated.Antt vs VC	Downregulated	Antt vs VC	CC	GO:0015629	Actin cytoskeleton	91/1146	499/19594	1.15385e-22	6.11538e-20	4.7004e-20	ACTR3/EPB41L2/AXL/DBN1/PAWR/LASP1/DGKH/CAPN2/ASAP1/TPM4/PXN/MYO1E/VASP/CORO1C/FBLIM1/KAT2B/MYO1B/SPECC1/SWAP70/GSN/BCAR1/MTSS2/PEAK1/ACTN1/TLNRD1/MYH9/SPTAN1/DAPK1/MPP4/PDLIM1/ABLIM1/NF2/ADD2/DMD/BAIAP2/LIMCH1/PDLIM5/KALRN/FERMT2/ZYX/MYH2/FSCN1/FHL3/MYLK/NOTCH3/CCDC102A/CD274/CRYAB/TMOD2/MARCKS/WDR1/ACTB/CNN3/CARMIL2/CDC42EP3/AUTS2/SMTN/SHROOM2/ACTN4/CNN2/FHDC1/SORBS2/ANLN/CGNL1/VCL/FMN2/AHNAK/PD…	91
951	downregulated.Antt vs VC	Downregulated	Antt vs VC	CC	GO:0030055	Cell-substrate junction	79/1146	428/19594	3.91845e-20	1.03839e-17	7.98126e-18	ACTR3/ANXA6/VIM/EPB41L2/CD44/CAPN1/TNS1/HACD3/LASP1/CAPN2/KIF23/TPM4/PXN/VASP/AJUBA/CORO1C/CAPN5/FBLIM1/TGFB1I1/GSN/BCAR1/HMCN1/ASAP3/PEAK1/ACTN1/MYH9/DST/SLC9A3R2/PDLIM1/TNS2/EPHA2/DMD/ENAH/RRAS2/FERMT2/ZYX/AKAP12/CSPG4/FHL3/ARHGAP31/THSD1/FLRT2/SNTB2/FAT1/MARCKS/ACTB/HSPB1/FHL2/CNN3/ACTN4/CNN2/RHOB/FZD2/NEDD9/DIXDC1/BCAR3/SORBS2/VCL/KLF11/INPP5E/AHNAK/EFNB2/PHLDB2/STARD8/PDLIM7/PALLD/ACTG1/FHL1…	79
952	downregulated.Antt vs VC	Downregulated	Antt vs VC	CC	GO:0005925	Focal adhesion	77/1146	419/19594	1.55974e-19	2.75554e-17	2.11797e-17	ACTR3/ANXA6/VIM/EPB41L2/CD44/CAPN1/TNS1/HACD3/LASP1/CAPN2/KIF23/TPM4/PXN/VASP/AJUBA/CORO1C/CAPN5/FBLIM1/TGFB1I1/GSN/BCAR1/ASAP3/PEAK1/ACTN1/MYH9/DST/SLC9A3R2/PDLIM1/TNS2/EPHA2/ENAH/RRAS2/FERMT2/ZYX/AKAP12/CSPG4/FHL3/ARHGAP31/THSD1/FLRT2/SNTB2/FAT1/MARCKS/ACTB/HSPB1/FHL2/CNN3/ACTN4/CNN2/RHOB/FZD2/NEDD9/DIXDC1/BCAR3/SORBS2/VCL/KLF11/INPP5E/AHNAK/EFNB2/PHLDB2/STARD8/PDLIM7/PALLD/ACTG1/FHL1/PDGFRB/EZ…	77
953	downregulated.Antt vs VC	Downregulated	Antt vs VC	CC	GO:0000786	Nucleosome	40/1146	129/19594	5.92827e-19	7.85496e-17	6.03748e-17	H1-4/H2AC6/H2AC21/H2BC12/CENPA/H4C12/H2AC19/H4C3/H2BC5/H2AC18/H4C8/H2BC21/H4C11/H2AC13/H4C14/H3C10/H2BC6/ACTB/H2AC20/H2BC13/H4C15/H3C15/H3C14/H3C2/H4C2/H2BC11/H2AX/H2BC18/H2AC11/H2AC15/H3C1/H3C3/H2AC16/H2BC17/H2AC12/H2AC4/H2BC3/H2BC14/H2BC1/H2AC1	40
954	downregulated.Antt vs VC	Downregulated	Antt vs VC	CC	GO:0044815	Dna packaging complex	47/1146	198/19594	7.75363e-17	8.21885e-15	6.31717e-15	NCAPG2/H1-4/SMC4/H2AC6/H2AC21/H2BC12/CENPA/NCAPH/NUF2/H4C12/H2AC19/H4C3/H2BC5/H2AC18/H4C8/H2BC21/DPF1/H4C11/H2AC13/H4C14/H3C10/H2BC6/ACTB/H2AC20/H2BC13/H4C15/H3C15/H3C14/H3C2/H4C2/SPC24/H2BC11/H2AX/H2BC18/H2AC11/SPC25/H2AC15/H3C1/H3C3/H2AC16/H2BC17/H2AC12/H2AC4/H2BC3/H2BC14/H2BC1/H2AC1	47
955	downregulated.Antt vs VC	Downregulated	Antt vs VC	CC	GO:0032432	Actin filament bundle	29/1146	78/19594	1.63869e-16	1.44751e-14	1.11259e-14	TPM4/PXN/FBLIM1/ACTN1/TLNRD1/MYH9/PDLIM1/ABLIM1/LIMCH1/PDLIM5/FERMT2/ZYX/FSCN1/FHL3/MYLK/CRYAB/MARCKS/ACTN4/CNN2/PDLIM7/RFLNB/PALLD/SYNPO/GAS2L1/LIMA1/TPM1/ACTA2/LDB3/ZNF664-RFLNA	29
956	downregulated.Antt vs VC	Downregulated	Antt vs VC	CC	GO:0032993	Protein-dna complex	49/1146	220/19594	2.69614e-16	2.04136e-14	1.56903e-14	H1-4/PCNA/H2AC6/H2AC21/H2BC12/MCM3/MCM2/CENPA/H4C12/H2AC19/H4C3/H2BC5/H2AC18/H4C8/H2BC21/H4C11/PRIM1/H2AC13/H4C14/H3C10/H2BC6/ACTB/NKX2-5/H2AC20/GINS1/H2BC13/H4C15/H3C15/H3C14/H3C2/H4C2/GINS2/H2BC11/H2AX/MCM5/TEAD4/H2BC18/H2AC11/H2AC15/H3C1/H3C3/H2AC16/H2BC17/H2AC12/H2AC4/H2BC3/H2BC14/H2BC1/H2AC1	49
957	downregulated.Antt vs VC	Downregulated	Antt vs VC	CC	GO:0005911	Cell-cell junction	79/1146	497/19594	3.33706e-16	2.2108e-14	1.69927e-14	ACTR3/DBN1/PXN/KIRREL1/MYO1E/VASP/AJUBA/ANXA2/CADM1/ILDR2/ECT2/HMCN1/ACTN1/FRMD5/MYH9/AJAP1/VSIG10/IQGAP3/MPP4/PDLIM1/NF2/EPHA2/CYTH3/BAIAP2/PDLIM5/NOTCH1/JCAD/PODXL/FERMT2/ZYX/ATP1B1/MYH2/RAP2B/FSCN1/BMPR2/FZD4/NECTIN1/PDZD2/FLRT2/CCDC85B/GJC1/KAZN/CDCA3/FAT1/WDR1/CDH24/AMOTL2/ACTB/WTIP/CNN3/KCNA2/MAGI3/SHROOM2/CNN2/PLEKHA7/CCND1/SLC8A1/CGNL1/VCL/AHNAK/EFNB2/PDLIM7/FRMD6/SYNPO/ACTG1/PTPRJ/CNTNAP…	79
958	downregulated.Antt vs VC	Downregulated	Antt vs VC	CC	GO:0042641	Actomyosin	27/1146	77/19594	9.8954e-15	5.38242e-13	4.13703e-13	DBN1/TPM4/PXN/FBLIM1/KAT2B/ACTN1/TLNRD1/MYH9/PDLIM1/ABLIM1/LIMCH1/PDLIM5/FERMT2/ZYX/FSCN1/FHL3/MYLK/ACTN4/CNN2/PDLIM7/PALLD/SYNPO/GAS2L1/LIMA1/TPM1/ACTA2/LDB3	27
959	downregulated.Antt vs VC	Downregulated	Antt vs VC	CC	GO:0031252	Cell leading edge	68/1146	416/19594	1.01555e-14	5.38242e-13	4.13703e-13	ACTR3/VIM/CD44/DBN1/PXN/VASP/AJUBA/CORO1C/SWAP70/KNSTRN/GSN/KIF18A/ANTXR1/BCAR1/ITSN1/ARPIN/ASAP3/MTSS2/ACTN1/MYH9/DST/EPS8/ABLIM1/NF2/EPHA2/CYTH3/ENAH/BAIAP2/PIEZO1/JCAD/PODXL/FERMT2/CSPG4/FSCN1/ARHGAP31/MYLK/PLCE1/CDK6/CCDC88A/FAT1/KCNC4/PLXND1/ACTB/EPS8L2/CARMIL2/KCNA2/TUBB3/NEDD9/SORBS2/INPP5E/ARHGEF26/PHLDB2/PDLIM7/PALLD/AMPH/KITLG/KANK1/PTPRJ/CNTNAP2/EZR/ADORA1/LIMA1/WWC1/TIAM2/TPM1/ACTA2/U…	68
960	downregulated.Antt vs VC	Downregulated	Antt vs VC	CC	GO:0001725	Stress fiber	25/1146	69/19594	4.02831e-14	1.77917e-12	1.3675e-12	TPM4/PXN/FBLIM1/ACTN1/TLNRD1/MYH9/PDLIM1/ABLIM1/LIMCH1/PDLIM5/FERMT2/ZYX/FSCN1/FHL3/MYLK/ACTN4/CNN2/PDLIM7/PALLD/SYNPO/GAS2L1/LIMA1/TPM1/ACTA2/LDB3	25
961	downregulated.Antt vs VC	Downregulated	Antt vs VC	CC	GO:0097517	Contractile actin filament bundle	25/1146	69/19594	4.02831e-14	1.77917e-12	1.3675e-12	TPM4/PXN/FBLIM1/ACTN1/TLNRD1/MYH9/PDLIM1/ABLIM1/LIMCH1/PDLIM5/FERMT2/ZYX/FSCN1/FHL3/MYLK/ACTN4/CNN2/PDLIM7/PALLD/SYNPO/GAS2L1/LIMA1/TPM1/ACTA2/LDB3	25
962	downregulated.Antt vs VC	Downregulated	Antt vs VC	CC	GO:0098687	Chromosomal region	61/1146	366/19594	1.02002e-13	4.15854e-12	3.19634e-12	RANGAP1/PDS5B/PCNA/SMC4/BUB1B/KAT2B/KNSTRN/MCM3/MCM2/KIF18A/CBX5/CENPE/CENPA/SPAG5/KNL1/SUMO3/ZNF618/NUF2/H4C12/ESCO2/CENPX/NEK2/CDCA8/XRCC3/CCNB1/AURKB/H4C3/BLM/CENPM/H4C8/EZH2/SKA2/CENPU/INCENP/CENPF/H4C11/H4C14/NABP1/ERCC6L/DNA2/H4C15/TOP2A/PIF1/CENPI/H4C2/SPC24/RAD51/H2BC11/H2AX/SPDL1/MCM5/ZWINT/CDK1/SPC25/PLK1/HELLS/CDK2/H2AC4/H2BC3/H2BC1/H2AC1	61
963	downregulated.Antt vs VC	Downregulated	Antt vs VC	CC	GO:0005912	Adherens junction	39/1146	172/19594	1.63655e-13	6.1955e-12	4.76198e-12	MYO1E/AJUBA/ANXA2/HMCN1/FRMD5/MYH9/AJAP1/MPP4/PDLIM1/NF2/CYTH3/BAIAP2/PDLIM5/NOTCH1/JCAD/FERMT2/ZYX/BMPR2/NECTIN1/CCDC85B/CDCA3/CDH24/ACTB/WTIP/CNN3/SHROOM2/PLEKHA7/VCL/EFNB2/PDLIM7/EZR/PLPP3/PKP3/CDH11/SHROOM3/NEXN/CTNND2/LDB3/OXTR	39
964	downregulated.Antt vs VC	Downregulated	Antt vs VC	CC	GO:0000775	Chromosome, centromeric region	45/1146	227/19594	3.84285e-13	1.35781e-11	1.04364e-11	RANGAP1/PDS5B/SMC4/BUB1B/KAT2B/KNSTRN/KIF18A/CBX5/CENPE/CENPA/SPAG5/KNL1/SUMO3/ZNF618/NUF2/H4C12/ESCO2/CENPX/NEK2/CDCA8/CCNB1/AURKB/H4C3/CENPM/H4C8/EZH2/SKA2/CENPU/INCENP/CENPF/H4C11/H4C14/ERCC6L/H4C15/TOP2A/CENPI/H4C2/SPC24/H2BC11/SPDL1/ZWINT/SPC25/PLK1/HELLS/H2AC4	45
965	downregulated.Antt vs VC	Downregulated	Antt vs VC	CC	GO:0030027	Lamellipodium	41/1146	202/19594	1.91634e-12	6.34789e-11	4.87911e-11	ACTR3/CD44/DBN1/PXN/VASP/AJUBA/CORO1C/SWAP70/GSN/ANTXR1/BCAR1/ITSN1/ARPIN/MTSS2/ABLIM1/NF2/EPHA2/ENAH/BAIAP2/PIEZO1/PODXL/FERMT2/CSPG4/FSCN1/ARHGAP31/MYLK/PLCE1/CCDC88A/FAT1/PLXND1/ACTB/CARMIL2/KCNA2/TUBB3/NEDD9/SORBS2/PALLD/KITLG/TIAM2/ACTA2/UNC5C	41
966	downregulated.Antt vs VC	Downregulated	Antt vs VC	CC	GO:0005938	Cell cortex	52/1146	310/19594	5.37183e-12	1.67475e-10	1.28724e-10	EPB41L2/DBN1/LASP1/CAPN2/TPM4/TRAF2/PXN/MYO1E/CORO1C/MELK/FNBP1L/GSN/MICAL3/ECT2/HMCN1/MTSS2/ACTN1/MYH9/DST/SPTAN1/EPS8/PHLDB1/NF2/DMD/FERMT2/AKAP12/DENND2B/RHOBTB3/FSCN1/TRIP10/TNFAIP2/MARCKS/WDR1/ACTB/CRIP2/GNAI1/SHROOM2/ACTN4/RHOB/NEDD9/ANLN/FMN2/PHLDB2/EZR/FGFR2/SHROOM3/CALD1/CCN2/FGF1/CAV1/TRPC4/MISP	52
967	downregulated.Antt vs VC	Downregulated	Antt vs VC	CC	GO:0005819	Spindle	61/1146	402/19594	6.67758e-12	1.96618e-10	1.51124e-10	RANGAP1/NEK6/KIF23/BUB1B/CALM3/CKAP2L/KNSTRN/MICAL3/TACC3/KIF18A/TTLL12/PHLPP2/CENPE/ECT2/SPAG5/KIF4A/MYH9/TFDP2/PSRC1/MAPKBP1/DLGAP5/NEK2/KLHL42/CDCA8/MID1/CCNB1/HMMR/AURKB/NIN/KIFC1/TBL1XR1/NEDD1/SKA2/HASPIN/INCENP/CDC20/CENPF/KIF20A/PLK4/FBXO5/HSPB1/CDC14A/LIMK2/CKAP2/ESPL1/ASPM/NEDD9/MTCL1/MAP7D3/CDC25B/ERCC2/SPDL1/FMN2/CDK1/PLK1/CDC7/KATNAL1/KIF18B/FAM83D/PLK2/MISP	61
968	downregulated.Antt vs VC	Downregulated	Antt vs VC	CC	GO:0043292	Contractile fiber	43/1146	238/19594	3.1902e-11	8.89898e-10	6.83993e-10	DEK/TPM4/CALM3/CACNA1C/CORO1C/KAT2B/FHOD3/ACTN1/DST/SIMC1/PDLIM1/DMD/PDLIM5/FERMT2/MYH2/FHL3/SYNC/ANKRD1/CRYAB/TMOD2/HSPB1/FHL2/ACTN4/SORBS2/SLC8A1/ATP2B4/VCL/ANK1/AHNAK/PDLIM7/PALLD/SYNPO/ACTG1/TPM2/DES/CALD1/JPH2/TPM1/ACTA2/NEXN/LDB3/SYNPO2L/MYPN	43
969	downregulated.Antt vs VC	Downregulated	Antt vs VC	CC	GO:0030016	Myofibril	41/1146	228/19594	1.06534e-10	2.82316e-09	2.16994e-09	TPM4/CALM3/CACNA1C/CORO1C/KAT2B/FHOD3/ACTN1/DST/SIMC1/PDLIM1/DMD/PDLIM5/FERMT2/MYH2/FHL3/SYNC/ANKRD1/CRYAB/TMOD2/HSPB1/FHL2/ACTN4/SORBS2/SLC8A1/ATP2B4/VCL/ANK1/AHNAK/PDLIM7/PALLD/SYNPO/ACTG1/TPM2/DES/CALD1/JPH2/TPM1/NEXN/LDB3/SYNPO2L/MYPN	41
970	downregulated.Antt vs VC	Downregulated	Antt vs VC	CC	GO:0030017	Sarcomere	37/1146	209/19594	1.35624e-09	3.4229e-08	2.63091e-08	TPM4/CALM3/CACNA1C/CORO1C/KAT2B/FHOD3/ACTN1/DST/SIMC1/PDLIM1/DMD/PDLIM5/FERMT2/MYH2/FHL3/SYNC/ANKRD1/CRYAB/TMOD2/HSPB1/FHL2/ACTN4/SORBS2/SLC8A1/ATP2B4/ANK1/PDLIM7/PALLD/SYNPO/TPM2/DES/JPH2/TPM1/NEXN/LDB3/SYNPO2L/MYPN	37
971	downregulated.Antt vs VC	Downregulated	Antt vs VC	CC	GO:0031674	I band	28/1146	139/19594	7.30229e-09	1.75919e-07	1.35215e-07	CACNA1C/KAT2B/FHOD3/ACTN1/DST/PDLIM1/DMD/PDLIM5/FERMT2/FHL3/SYNC/ANKRD1/CRYAB/HSPB1/FHL2/ACTN4/SORBS2/SLC8A1/ATP2B4/PDLIM7/PALLD/SYNPO/DES/JPH2/NEXN/LDB3/SYNPO2L/MYPN	28
972	downregulated.Antt vs VC	Downregulated	Antt vs VC	CC	GO:0043505	Cenp-a containing nucleosome	10/1146	18/19594	1.28125e-08	2.82944e-07	2.17476e-07	CENPA/H4C12/H4C3/H4C8/H4C11/H4C14/H4C15/H4C2/H2BC11/H2AC4	10
973	downregulated.Antt vs VC	Downregulated	Antt vs VC	CC	GO:0061638	Cenp-a containing chromatin	10/1146	18/19594	1.28125e-08	2.82944e-07	2.17476e-07	CENPA/H4C12/H4C3/H4C8/H4C11/H4C14/H4C15/H4C2/H2BC11/H2AC4	10
974	downregulated.Antt vs VC	Downregulated	Antt vs VC	CC	GO:0000776	Kinetochore	28/1146	146/19594	2.26128e-08	4.79392e-07	3.6847e-07	RANGAP1/BUB1B/KAT2B/KNSTRN/KIF18A/CBX5/CENPE/CENPA/SPAG5/KNL1/SUMO3/NUF2/CENPX/NEK2/CCNB1/AURKB/CENPM/SKA2/CENPU/INCENP/CENPF/ERCC6L/CENPI/SPC24/SPDL1/ZWINT/SPC25/PLK1	28
975	downregulated.Antt vs VC	Downregulated	Antt vs VC	CC	GO:0034506	Chromosome, centromeric core domain	10/1146	19/19594	2.56273e-08	5.22402e-07	4.01528e-07	CENPA/H4C12/H4C3/H4C8/H4C11/H4C14/H4C15/H4C2/H2BC11/H2AC4	10
976	downregulated.Antt vs VC	Downregulated	Antt vs VC	CC	GO:0030863	Cortical cytoskeleton	23/1146	107/19594	4.46505e-08	8.76473e-07	6.73674e-07	EPB41L2/DBN1/LASP1/CAPN2/TPM4/MYO1E/GSN/MTSS2/ACTN1/MYH9/SPTAN1/NF2/DMD/WDR1/ACTB/SHROOM2/ACTN4/ANLN/EZR/SHROOM3/CALD1/TRPC4/MISP	23
977	downregulated.Antt vs VC	Downregulated	Antt vs VC	CC	GO:0030018	Z disc	25/1146	127/19594	7.43023e-08	1.40644e-06	1.08101e-06	CACNA1C/FHOD3/ACTN1/DST/PDLIM1/DMD/PDLIM5/FHL3/SYNC/CRYAB/HSPB1/FHL2/ACTN4/SORBS2/SLC8A1/ATP2B4/PDLIM7/PALLD/SYNPO/DES/JPH2/NEXN/LDB3/SYNPO2L/MYPN	25
978	downregulated.Antt vs VC	Downregulated	Antt vs VC	CC	GO:0000779	Condensed chromosome, centromeric region	28/1146	156/19594	9.93141e-08	1.75595e-06	1.34966e-06	RANGAP1/BUB1B/KAT2B/KNSTRN/KIF18A/CBX5/CENPE/CENPA/SPAG5/KNL1/SUMO3/NUF2/CENPX/NEK2/CCNB1/AURKB/CENPM/SKA2/CENPU/INCENP/CENPF/ERCC6L/CENPI/SPC24/SPDL1/ZWINT/SPC25/PLK1	28
979	downregulated.Antt vs VC	Downregulated	Antt vs VC	CC	GO:0030864	Cortical actin cytoskeleton	19/1146	79/19594	9.96576e-08	1.75595e-06	1.34966e-06	EPB41L2/DBN1/LASP1/CAPN2/MYO1E/GSN/MTSS2/ACTN1/MYH9/SPTAN1/NF2/DMD/WDR1/SHROOM2/ACTN4/ANLN/SHROOM3/CALD1/MISP	19
980	downregulated.Antt vs VC	Downregulated	Antt vs VC	CC	GO:0000793	Condensed chromosome	38/1146	255/19594	1.02707e-07	1.75595e-06	1.34966e-06	RANGAP1/BUB1B/TEX11/KAT2B/HMGB2/KNSTRN/KIF18A/CBX5/CENPE/CENPA/SPAG5/KNL1/SUMO3/NUF2/CENPX/NEK2/HMGB1/CCNB1/AURKB/BLM/CENPM/SKA2/CENPU/INCENP/CENPF/ERCC6L/TOP2A/CENPI/MKI67/SPC24/RAD51/SHOC1/H2AX/SPDL1/ZWINT/SPC25/PLK1/CDK2	38
981	downregulated.Antt vs VC	Downregulated	Antt vs VC	CC	GO:0001726	Ruffle	30/1146	177/19594	1.31831e-07	2.18346e-06	1.67825e-06	CORO1C/KNSTRN/KIF18A/BCAR1/ASAP3/MTSS2/ACTN1/MYH9/EPS8/NF2/EPHA2/CYTH3/BAIAP2/JCAD/PODXL/CSPG4/FSCN1/CDK6/EPS8L2/CARMIL2/INPP5E/ARHGEF26/PDLIM7/PALLD/KANK1/PTPRJ/EZR/LIMA1/WWC1/TPM1	30
982	downregulated.Antt vs VC	Downregulated	Antt vs VC	CC	GO:0000922	Spindle pole	29/1146	169/19594	1.61746e-07	2.59773e-06	1.99667e-06	NEK6/CALM3/CKAP2L/KNSTRN/TACC3/SPAG5/PSRC1/MAPKBP1/DLGAP5/NEK2/CCNB1/AURKB/NIN/NEDD1/CDC20/CENPF/PLK4/CDC14A/CKAP2/ASPM/NEDD9/MTCL1/CDC25B/SPDL1/PLK1/KATNAL1/FAM83D/PLK2/MISP	29
983	downregulated.Antt vs VC	Downregulated	Antt vs VC	CC	GO:0000228	Nuclear chromosome	34/1146	228/19594	4.68878e-07	7.30898e-06	5.61782e-06	PCNA/TEX11/MCM3/MCM2/H4C12/NEK2/TIMELESS/MMS22L/H4C3/BLM/H4C8/POLE/INCENP/H4C11/PRIM1/H4C14/H3C10/BAZ1A/GINS1/H4C15/EXOSC9/TOP2A/H3C2/H4C2/TONSL/GINS2/RAD51/SHOC1/H2AX/MCM5/PLK1/H3C1/H3C3/MCM10	34
984	downregulated.Antt vs VC	Downregulated	Antt vs VC	CC	GO:0045121	Membrane raft	43/1146	326/19594	5.07444e-07	7.68416e-06	5.9062e-06	KCNMA1/EHD2/CAPN2/TRAF2/TUBB/PPP2R1B/CORO1C/IGF1R/ANXA2/EMP2/KIF18A/FURIN/PTCH1/RGMB/FAS/ADD2/HYAL2/DMD/PODXL/SMURF2/EFHD2/ATP1B1/RAP2B/TUBA1C/PRKAR2B/BMPR2/SELPLG/CAVIN1/CD24/ATP2B4/AHNAK/S100A10/F2R/MS4A4A/EZR/LY6K/PLPP3/LYPD6/IRS1/CAV2/S1PR1/CAV1/TRPC4	43
985	downregulated.Antt vs VC	Downregulated	Antt vs VC	CC	GO:0098857	Membrane microdomain	43/1146	327/19594	5.52038e-07	8.12723e-06	6.24675e-06	KCNMA1/EHD2/CAPN2/TRAF2/TUBB/PPP2R1B/CORO1C/IGF1R/ANXA2/EMP2/KIF18A/FURIN/PTCH1/RGMB/FAS/ADD2/HYAL2/DMD/PODXL/SMURF2/EFHD2/ATP1B1/RAP2B/TUBA1C/PRKAR2B/BMPR2/SELPLG/CAVIN1/CD24/ATP2B4/AHNAK/S100A10/F2R/MS4A4A/EZR/LY6K/PLPP3/LYPD6/IRS1/CAV2/S1PR1/CAV1/TRPC4	43
986	downregulated.Antt vs VC	Downregulated	Antt vs VC	CC	GO:0031258	Lamellipodium membrane	9/1146	22/19594	1.92934e-06	2.76365e-05	2.1242e-05	CD44/VASP/ANTXR1/EPHA2/PIEZO1/FERMT2/CSPG4/PLXND1/KCNA2	9
987	downregulated.Antt vs VC	Downregulated	Antt vs VC	CC	GO:0072686	Mitotic spindle	26/1146	160/19594	2.02637e-06	2.82625e-05	2.17231e-05	RANGAP1/KIF23/CKAP2L/KNSTRN/TACC3/KIF18A/PHLPP2/CENPE/ECT2/SPAG5/TFDP2/MAPKBP1/AURKB/NIN/KIFC1/TBL1XR1/CDC14A/LIMK2/ESPL1/ASPM/CDK1/PLK1/CDC7/KIF18B/FAM83D/MISP	26
988	downregulated.Antt vs VC	Downregulated	Antt vs VC	CC	GO:0005667	Transcription regulator complex	54/1146	483/19594	3.70811e-06	4.9384e-05	3.79575e-05	ATF7IP/CBFB/RXRA/TEAD1/JAZF1/AJUBA/RARG/CBX5/HIF1A/TFDP2/FOSL2/PDLIM1/ARNTL2/HMGB1/TBX2/ATF5/HYAL2/RBL1/TBL1XR1/SOX9/GLI3/GMNN/ANKRD1/RUNX2/TLE3/PITX1/SMAD3/LHX1/WTIP/NKX2-5/HES6/MXD3/ALX4/CCND1/ERCC2/SMAD9/PITX2/TEAD4/SMAD6/FOXF2/CORO2A/PBX3/SIX2/E2F8/TCF7L1/CDK2/E2F1/E2F2/TRERF1/TEAD2/SOX18/TLE4/TCF4/SOX4	54
989	downregulated.Antt vs VC	Downregulated	Antt vs VC	CC	GO:0098858	Actin-based cell projection	31/1146	217/19594	3.72709e-06	4.9384e-05	3.79575e-05	CD44/CNP/MYO1E/VASP/MYO1B/ANTXR1/TGFB1/EPS8/PDGFA/ATP8B1/NF2/HYAL2/DMD/ENAH/BAIAP2/PODXL/FSCN1/FAT1/CDC14A/EPS8L2/TUBB3/TENM2/FMN2/KITLG/EZR/TIAM2/ACTA2/MYO7B/UNC5C/OXTR/RIPOR2	31
990	downregulated.Antt vs VC	Downregulated	Antt vs VC	CC	GO:0005884	Actin filament	20/1146	113/19594	8.09061e-06	0.000104586	8.03868e-05	DBN1/PAWR/TPM4/MYO1B/SPECC1/ACTN1/PDLIM1/PDLIM5/ACTB/SMTN/FHDC1/PDLIM7/PALLD/ACTG1/TPM2/EZR/GAS2L1/TPM1/LDB3/MISP	20
991	downregulated.Antt vs VC	Downregulated	Antt vs VC	CC	GO:0000781	Chromosome, telomeric region	25/1146	166/19594	1.25693e-05	0.000158612	0.000121912	PCNA/MCM3/MCM2/CBX5/H4C12/XRCC3/H4C3/BLM/H4C8/EZH2/H4C11/H4C14/NABP1/DNA2/H4C15/PIF1/H4C2/RAD51/H2AX/MCM5/CDK1/CDK2/H2BC3/H2BC1/H2AC1	25
992	downregulated.Antt vs VC	Downregulated	Antt vs VC	CC	GO:0000940	Outer kinetochore	6/1146	12/19594	2.68969e-05	0.000331519	0.000254812	BUB1B/CCNB1/SKA2/CENPF/SPDL1/PLK1	6
993	downregulated.Antt vs VC	Downregulated	Antt vs VC	CC	GO:0044853	Plasma membrane raft	19/1146	113/19594	2.86588e-05	0.000345208	0.000265333	KCNMA1/EHD2/CORO1C/IGF1R/KIF18A/PTCH1/ADD2/ATP1B1/BMPR2/SELPLG/CAVIN1/ATP2B4/F2R/MS4A4A/EZR/IRS1/CAV2/CAV1/TRPC4	19
994	downregulated.Antt vs VC	Downregulated	Antt vs VC	CC	GO:0031256	Leading edge membrane	25/1146	175/19594	3.14938e-05	0.000370927	0.000285102	CD44/VASP/CORO1C/ANTXR1/MTSS2/EPS8/NF2/EPHA2/PIEZO1/JCAD/FERMT2/CSPG4/KCNC4/PLXND1/EPS8L2/KCNA2/AMPH/KANK1/PTPRJ/CNTNAP2/EZR/ADORA1/WWC1/TPM1/RIPOR2	25
995	downregulated.Antt vs VC	Downregulated	Antt vs VC	CC	GO:0030175	Filopodium	18/1146	105/19594	3.53399e-05	0.000407177	0.000312964	VASP/MYO1B/ANTXR1/NF2/DMD/ENAH/BAIAP2/PODXL/FSCN1/FAT1/TUBB3/TENM2/KITLG/EZR/TIAM2/ACTA2/UNC5C/RIPOR2	18
996	downregulated.Antt vs VC	Downregulated	Antt vs VC	CC	GO:0005901	Caveola	15/1146	82/19594	7.2174e-05	0.000813877	0.000625562	KCNMA1/EHD2/CORO1C/IGF1R/KIF18A/PTCH1/ATP1B1/BMPR2/CAVIN1/ATP2B4/F2R/IRS1/CAV2/CAV1/TRPC4	15
997	downregulated.Antt vs VC	Downregulated	Antt vs VC	CC	GO:0031253	Cell projection membrane	38/1146	339/19594	9.33889e-05	0.00103117	0.000792577	CD44/ASAP1/VASP/CORO1C/PHLPP2/ANTXR1/MTSS2/PTCH1/EPS8/NF2/EPHA2/DMD/ADCY3/PIEZO1/JCAD/PODXL/FERMT2/GPR161/CSPG4/FSCN1/SHANK3/KCNC4/PLXND1/EPS8L2/KCNA2/DHRS3/KANK1/PTPRJ/CNTNAP2/EZR/ADORA1/PKD1L1/LIMA1/WWC1/SLC26A4/TPM1/HHIP/RIPOR2	38
998	downregulated.Antt vs VC	Downregulated	Antt vs VC	CC	GO:0031093	Platelet alpha granule lumen	13/1146	67/19594	0.000115609	0.00125047	0.000961135	ACTN1/TGFB1/PDGFA/PCYOX1L/GAS6/PDGFB/EGF/ACTN4/TGFB3/VEGFC/SERPINE1/THBS1/TGFB2	13
999	downregulated.Antt vs VC	Downregulated	Antt vs VC	CC	GO:0010369	Chromocenter	6/1146	15/19594	0.000125107	0.00132613	0.00101929	CBX5/ESCO2/CDCA8/AURKB/INCENP/SALL1	6
1000	downregulated.Antt vs VC	Downregulated	Antt vs VC	CC	GO:0030496	Midbody	26/1146	203/19594	0.000142463	0.0014805	0.00113794	RALB/KIF23/ANXA2/MICAL3/TTLL12/CENPE/ECT2/SPAG5/KIF4A/PTCH1/PSRC1/NEK2/CDCA8/AURKB/INCENP/CENPF/KIF20A/CIT/GNAI1/ASPM/MTCL1/BCL3/ANLN/KLHDC8B/CDK1/PLK1	26
1001	downregulated.Antt vs VC	Downregulated	Antt vs VC	CC	GO:0005874	Microtubule	45/1146	435/19594	0.000149561	0.00152437	0.00117166	NEK6/KIF3C/TUBA4A/KIF23/CALM3/TUBB/KNSTRN/KIF18A/CENPE/SPAG5/KIF4A/DST/PSRC1/NEK2/MID1/AURKB/BAIAP2/NIN/KIFC1/KIF17/TUBA1C/SKA2/FKBP4/INCENP/GTSE1/KIF20A/SNTB2/TUBB6/TUBA1A/NAV3/CKAP2/TUBB3/SHROOM2/ASPM/FHDC1/STMN1/SLC8A1/CDK1/PLK1/KATNAL1/KIF18B/GAS2L1/SHROOM3/REEP1/MISP	45
1002	downregulated.Antt vs VC	Downregulated	Antt vs VC	CC	GO:0005657	Replication fork	12/1146	60/19594	0.000155209	0.00155072	0.00119191	PCNA/MCM3/TIMELESS/XRCC3/MMS22L/BLM/PRIM1/PIF1/TONSL/H2AX/MCM10/UHRF1	12
1003	downregulated.Antt vs VC	Downregulated	Antt vs VC	CC	GO:0000792	Heterochromatin	13/1146	69/19594	0.000157998	0.00155072	0.00119191	CBX6/H1-4/CBX5/CENPA/ZNF618/ESCO2/EZH2/INCENP/WDR76/HELLS/SALL1/CBX2/UHRF1	13
1004	downregulated.Antt vs VC	Downregulated	Antt vs VC	CC	GO:0071162	Cmg complex	5/1146	11/19594	0.000232916	0.00224446	0.00172514	MCM3/MCM2/GINS1/GINS2/MCM5	5
1005	downregulated.Antt vs VC	Downregulated	Antt vs VC	CC	GO:0005721	Pericentric heterochromatin	7/1146	23/19594	0.000245951	0.00232775	0.00178916	CBX5/CENPA/ZNF618/ESCO2/EZH2/INCENP/HELLS	7
1006	downregulated.Antt vs VC	Downregulated	Antt vs VC	CC	GO:0032154	Cleavage furrow	11/1146	55/19594	0.000289551	0.00269232	0.00206937	ECT2/HMCN1/MYH9/NF2/MYLK/KIF20A/PLCD3/PLK4/CIT/RHOB/LIMA1	11
1007	downregulated.Antt vs VC	Downregulated	Antt vs VC	CC	GO:0031261	Dna replication preinitiation complex	5/1146	12/19594	0.000380072	0.00347307	0.00266947	MCM3/MCM2/GINS1/GINS2/MCM5	5
1008	downregulated.Antt vs VC	Downregulated	Antt vs VC	CC	GO:0031143	Pseudopodium	6/1146	18/19594	0.000398684	0.0035814	0.00275274	CNP/CAPN2/ACTN1/ACTN4/F2RL1/LDB3	6
1009	downregulated.Antt vs VC	Downregulated	Antt vs VC	CC	GO:0062023	Collagen-containing extracellular matrix	43/1146	429/19594	0.000408728	0.00361043	0.00277505	EFEMP1/ANXA6/PKM/COL16A1/TGFB1I1/TIMP3/ANXA2/HMCN1/DST/TGFB1/LTBP2/AGRN/SDC2/TGFBI/COL7A1/SCARA3/CCN1/CSPG4/MATN2/COL4A5/P3H2/PDGFB/COL4A1/ANXA8/LAMA5/TGFB3/SPON1/COL5A3/SERPINE1/SEMA7A/S100A10/CCDC80/COL8A1/ADAMTS15/WNT5B/FGFR2/PRELP/THBS1/CCN2/ADAM19/TINAGL1/TGFB2/F3	43
1010	downregulated.Antt vs VC	Downregulated	Antt vs VC	CC	GO:0000307	Cyclin-dependent protein kinase holoenzyme complex	10/1146	49/19594	0.000457137	0.00397185	0.00305284	PCNA/CCNB2/CCNB1/CDK6/CCND1/CCNA2/CDK1/CCNF/CDK2/CCNE2	10
1011	downregulated.Antt vs VC	Downregulated	Antt vs VC	CC	GO:1990752	Microtubule end	8/1146	33/19594	0.000499	0.00426564	0.00327866	KNSTRN/SPAG5/DST/NAV3/ASPM/KIF18B/GAS2L1/MISP	8
1012	downregulated.Antt vs VC	Downregulated	Antt vs VC	CC	GO:0031091	Platelet alpha granule	14/1146	91/19594	0.000791472	0.00665841	0.00511779	ACTN1/TGFB1/PDGFA/PCYOX1L/GAS6/SYTL4/PDGFB/EGF/ACTN4/TGFB3/VEGFC/SERPINE1/THBS1/TGFB2	14
1013	downregulated.Antt vs VC	Downregulated	Antt vs VC	CC	GO:0043596	Nuclear replication fork	7/1146	28/19594	0.000918777	0.00760862	0.00584814	PCNA/MCM3/TIMELESS/MMS22L/PRIM1/TONSL/MCM10	7
1014	downregulated.Antt vs VC	Downregulated	Antt vs VC	CC	GO:0032153	Cell division site	12/1146	73/19594	0.00101287	0.00825882	0.00634789	ECT2/HMCN1/MYH9/NF2/MYLK/KIF20A/PLCD3/PLK4/CIT/RHOB/ANLN/LIMA1	12
1015	downregulated.Antt vs VC	Downregulated	Antt vs VC	CC	GO:0005796	Golgi lumen	15/1146	104/19594	0.00103926	0.00834559	0.00641458	SDC1/FURIN/TGFB1/PDGFA/AGRN/SDC2/MUC16/CSPG4/GAS6/PDGFB/WNT7A/WNT7B/WNT5B/PRELP/WNT3	15
1016	downregulated.Antt vs VC	Downregulated	Antt vs VC	CC	GO:0002102	Podosome	7/1146	29/19594	0.00115064	0.00896825	0.00689317	ASAP1/TPM4/GSN/FSCN1/WDR1/VCL/PALLD	7
1017	downregulated.Antt vs VC	Downregulated	Antt vs VC	CC	GO:0031941	Filamentous actin	7/1146	29/19594	0.00115064	0.00896825	0.00689317	SPECC1/PDLIM1/PDLIM5/SMTN/PDLIM7/ACTG1/LDB3	7
1018	downregulated.Antt vs VC	Downregulated	Antt vs VC	CC	GO:0098644	Complex of collagen trimers	6/1146	22/19594	0.00130995	0.010062	0.00773382	COL16A1/COL7A1/COL4A5/COL4A1/COL5A3/COL8A1	6
1019	downregulated.Antt vs VC	Downregulated	Antt vs VC	CC	GO:0001650	Fibrillar center	18/1146	140/19594	0.00136466	0.0103324	0.00794172	UBTF/TCOF1/SAMD4A/KLF6/JAZF1/FBLIM1/SPECC1/NOP56/MAP3K14/HERC4/MALT1/ANKRD1/CAMK4/NUAK1/NFIB/EZR/CILK1/TRERF1	18
1020	downregulated.Antt vs VC	Downregulated	Antt vs VC	CC	GO:0005788	Endoplasmic reticulum lumen	32/1146	311/19594	0.00139407	0.0104065	0.00799862	COL16A1/WFS1/PDGFA/SDC2/COL7A1/CCN1/GAS6/TSPAN14/IGFBP3/COL4A5/P3H2/PDGFB/EVA1A/FAM20C/COL4A1/FSTL1/WNT7A/SPON1/PDGFC/WNT7B/COL5A3/PRSS23/TSPAN15/ARSJ/COL8A1/WNT5B/THBS1/WNT3/PCSK9/ADAMTSL1/EDN1/BMP4	32
1021	downregulated.Antt vs VC	Downregulated	Antt vs VC	CC	GO:0005902	Microvillus	13/1146	90/19594	0.00216054	0.015904	0.0122241	CD44/CNP/MYO1E/MYO1B/TGFB1/PDGFA/HYAL2/PODXL/FSCN1/FMN2/EZR/MYO7B/OXTR	13
1022	downregulated.Antt vs VC	Downregulated	Antt vs VC	CC	GO:0030315	T-tubule	9/1146	51/19594	0.00255249	0.0185318	0.0142439	CACNA1C/STAC/IGF1R/ATP1B1/CACNB3/SLC8A1/TGFB3/ATP2B4/AHNAK	9
1023	downregulated.Antt vs VC	Downregulated	Antt vs VC	CC	GO:0002116	Semaphorin receptor complex	4/1146	11/19594	0.00275635	0.0197414	0.0151736	PLXNA1/NRP2/PLXND1/PLXNA4	4
1024	downregulated.Antt vs VC	Downregulated	Antt vs VC	CC	GO:0098685	Schaffer collateral - ca1 synapse	11/1146	72/19594	0.00295413	0.0208759	0.0160456	NEFH/BAIAP2/AKAP12/APBA1/NEFL/ACTB/WNT7A/PLAT/EFNB2/ACTG1/CDH11	11
1025	downregulated.Antt vs VC	Downregulated	Antt vs VC	CC	GO:0005604	Basement membrane	13/1146	95/19594	0.00350757	0.0244607	0.018801	TIMP3/ANXA2/HMCN1/DST/AGRN/TGFBI/COL7A1/COL4A5/P3H2/COL4A1/LAMA5/CCDC80/COL8A1	13
1026	downregulated.Antt vs VC	Downregulated	Antt vs VC	CC	GO:0042383	Sarcolemma	16/1146	131/19594	0.00412564	0.0283972	0.0218267	CACNA1C/STAC/CORO1C/IGF1R/DMD/ATP1B1/CACNB3/SYNC/SLC8A1/TGFB3/ATP2B4/VCL/AHNAK/DES/CAV2/CAV1	16
1027	downregulated.Antt vs VC	Downregulated	Antt vs VC	CC	GO:0051233	Spindle midzone	7/1146	36/19594	0.00430635	0.0288907	0.022206	KIF18A/CENPE/CDCA8/AURKB/INCENP/PLK1/KIF18B	7
1028	downregulated.Antt vs VC	Downregulated	Antt vs VC	CC	GO:0097431	Mitotic spindle pole	7/1146	36/19594	0.00430635	0.0288907	0.022206	SPAG5/MAPKBP1/AURKB/NIN/ASPM/PLK1/FAM83D	7
1029	downregulated.Antt vs VC	Downregulated	Antt vs VC	CC	GO:0043240	Fanconi anaemia nuclear complex	4/1146	13/19594	0.00543629	0.0355708	0.0273404	FANCG/CENPX/FANCA/FANCE	4
1030	downregulated.Antt vs VC	Downregulated	Antt vs VC	CC	GO:1990907	Beta-catenin-tcf complex	4/1146	13/19594	0.00543629	0.0355708	0.0273404	TLE3/TCF7L1/TLE4/TCF4	4
1031	downregulated.Antt vs VC	Downregulated	Antt vs VC	CC	GO:0045177	Apical part of cell	38/1146	424/19594	0.0059999	0.0387798	0.0298069	KCNMA1/CD44/LDLR/MYO1B/EMP2/SLC16A3/PTCH1/AJAP1/SLC9A3R2/ATP8B1/NF2/TCIRG1/HYAL2/NIN/NOTCH1/PODXL/ATP1B1/NEDD1/CSPG4/FAT1/SHROOM2/ASPM/SLC29A1/MTCL1/SORBS2/CNKSR3/PLAT/ACTG1/PDGFRB/EZR/SLC52A3/ADRB2/SLC26A4/SHROOM3/MYO7B/LMO7/OXTR/RIPOR2	38
1032	downregulated.Antt vs VC	Downregulated	Antt vs VC	CC	GO:1902911	Protein kinase complex	14/1146	115/19594	0.00722459	0.045823	0.0352205	PCNA/CCNB2/IGF1R/DAPK1/CCNB1/CDK6/CCND1/ERCC2/CCNA2/CDK1/CCNF/CDK2/IRS1/CCNE2	14
1033	downregulated.Antt vs VC	Downregulated	Antt vs VC	CC	GO:1990023	Mitotic spindle midzone	4/1146	14/19594	0.00726252	0.045823	0.0352205	KIF18A/CENPE/AURKB/KIF18B	4
1034	downregulated.Antt vs VC	Downregulated	Antt vs VC	MF	GO:0003779	Actin binding	85/1116	439/18410	4.8934e-22	4.38448e-19	3.91472e-19	KCNMA1/ACTR3/ANXA6/EPB41L2/TNS1/DBN1/PAWR/LASP1/TPM4/MICAL2/MYO1E/VASP/AJUBA/CORO1C/MYO1B/FHOD3/GSN/MICAL3/KIF18A/ANTXR1/MTSS2/ACTN1/TLNRD1/MYH9/DST/IQGAP3/SPTAN1/EPS8/PDLIM1/ABLIM1/NF2/CTNNAL1/ADD2/DMD/MRTFA/ENAH/LIMCH1/PDLIM5/FERMT2/MYH2/FSCN1/FHL3/MYLK/SHANK3/CCDC88A/TMOD2/INF2/SNTB2/MARCKS/TAGLN/WDR1/EPS8L2/CNN3/SMTN/SHROOM2/ACTN4/HIP1/CNN2/DAAM2/ANXA8/DIXDC1/FHDC1/ANLN/VCL/FMN2/PDLIM7/PALLD/…	85
1035	downregulated.Antt vs VC	Downregulated	Antt vs VC	MF	GO:0046982	Protein heterodimerization activity	58/1116	332/18410	2.27665e-13	1.01994e-10	9.10659e-11	TCOF1/H2AC6/TPM4/H2AC21/H2BC12/HIF1A/CENPA/H4C12/PDGFA/ADD2/H2AC19/PAFAH1B3/H4C3/H2BC5/ATP1B1/H2AC18/H4C8/H2BC21/FZD4/H4C11/H2AC13/H4C14/H3C10/H2BC6/BOK/PDGFB/H2AC20/H2BC13/H4C15/H3C15/TOP2A/HIP1/H3C14/H3C2/H4C2/TENM2/BARD1/H2BC11/H2AX/H2BC18/H2AC11/H2AC15/TPM2/H3C1/H3C3/ADORA1/H2AC16/H2BC17/CAV2/TPM1/TCF4/H2AC12/CAV1/H2AC4/H2BC3/H2BC14/H2BC1/H2AC1	58
1036	downregulated.Antt vs VC	Downregulated	Antt vs VC	MF	GO:0045296	Cadherin binding	55/1116	333/18410	9.62995e-12	2.87614e-09	2.56799e-09	RANGAP1/PPP1R13L/TMPO/PKM/DBN1/LASP1/CCNB2/CEMIP2/ASAP1/VASP/MYO1B/SWAP70/FNBP1L/ANXA2/NOP56/PLCB3/MYH9/SPTAN1/SLC9A3R2/PDLIM1/CTNNAL1/EPHA2/BAIAP2/CIP2A/PDLIM5/MRTFB/FASN/EFHD2/FSCN1/MMP24/BMPR2/NOTCH3/TAGLN2/H3C10/CDH24/EPS8L2/CNN3/CNN2/H3C2/ANLN/VCL/AHNAK/PHLDB2/H3C1/PTPRJ/SFN/H3C3/EZR/LIMA1/PKP3/CDH11/CALD1/GPRC5A/CTNND2/TRPC4	55
1037	downregulated.Antt vs VC	Downregulated	Antt vs VC	MF	GO:0051015	Actin filament binding	40/1116	214/18410	1.51246e-10	3.38792e-08	3.02492e-08	ACTR3/ANXA6/DBN1/LASP1/TPM4/MYO1E/AJUBA/CORO1C/MYO1B/FHOD3/GSN/ANTXR1/ACTN1/MYH9/IQGAP3/SPTAN1/ABLIM1/CTNNAL1/ADD2/DMD/FERMT2/MYH2/FSCN1/MARCKS/TAGLN/WDR1/SHROOM2/ACTN4/HIP1/ANXA8/TPM2/CORO2A/EZR/GAS2L1/LIMA1/SHROOM3/TPM1/NEXN/MYO7B/MISP	40
1038	downregulated.Antt vs VC	Downregulated	Antt vs VC	MF	GO:0008013	Beta-catenin binding	19/1116	86/18410	7.13526e-07	0.000127864	0.000114164	PXN/DACT1/SUFU/AJAP1/SLC9A3R2/TBL1XR1/SOX9/GLI3/SMAD3/SHROOM2/VCL/AXIN2/KANK1/PTPRJ/TCF7L1/SALL1/TCF4/CTNND2/TRPC4	19
1039	downregulated.Antt vs VC	Downregulated	Antt vs VC	MF	GO:0005200	Structural constituent of cytoskeleton	21/1116	104/18410	9.2198e-07	0.000137682	0.000122931	ACTR3/VIM/TUBA4A/TUBB/SPTAN1/ADD2/NEFH/DMD/AGRN/TUBA1C/NEFL/TUBB6/TUBA1A/ACTB/TUBB3/HIP1/SORBS2/ANK1/ACTG1/DES/TPM1	21
1040	downregulated.Antt vs VC	Downregulated	Antt vs VC	MF	GO:0005516	Calmodulin binding	31/1116	200/18410	1.33882e-06	0.000171369	0.000153008	MYO1E/CACNA1C/ITPKB/MYO1B/PLCB3/MYH9/IQGAP3/SPTAN1/DAPK1/WFS1/FAS/ADD2/ADCY3/AKAP12/MYH2/MYLK/SNTB2/MARCKS/NRGN/CNN3/KCNN4/ASPM/CNN2/CAMK4/SLC8A1/ATP2B4/PDE1C/CAMKK1/CALD1/RGS4/CNN1	31
1041	downregulated.Antt vs VC	Downregulated	Antt vs VC	MF	GO:0004712	Protein serine/threonine/tyrosine kinase activity	53/1116	446/18410	2.07419e-06	0.000232309	0.000207419	SIK2/TYRO3/AXL/EPHB2/NEK6/BUB1B/MAP3K20/ROCK2/TRIO/IGF1R/MELK/MAP3K1/RPS6KA4/DAPK1/NEK2/MAPK12/EPHA2/AURKB/MAP3K14/KALRN/HASPIN/PASK/SGK1/CDK6/PLK4/DDR1/CIT/SPEG/PBK/LIMK2/DYRK2/FAM20C/PKN3/RPS6KA1/NUAK2/CAMK4/NUAK1/CDK1/ROS1/WEE1/PLK1/CDC7/PDGFRB/PKMYT1/CILK1/ALPK2/KSR2/CAMKK1/CDK2/FGFR2/DCLK2/FGFR3/PLK2	53
1042	downregulated.Antt vs VC	Downregulated	Antt vs VC	MF	GO:0008017	Microtubule binding	37/1116	272/18410	3.37912e-06	0.000336411	0.000300367	KIF3C/KIF23/KNSTRN/KIF18A/CENPE/SPAG5/KIF4A/DST/PSRC1/DLGAP5/MID1/NEFH/NIN/KIFC1/KIF17/SKA2/CENPF/GTSE1/CRYAB/KIF20A/CCDC88A/NAV3/STARD9/FHDC1/MTCL1/MAP7D3/SPC24/PLK1/KATNAL1/KIF18B/EZR/GAS2L1/FAM83D/C10orf90/REEP1/DCLK2/LZTS1	37
1043	downregulated.Antt vs VC	Downregulated	Antt vs VC	MF	GO:0004714	Transmembrane receptor protein tyrosine kinase activity	14/1116	60/18410	1.04564e-05	0.000936892	0.000836511	EFEMP1/NRP2/TYRO3/AXL/EPHB2/CRIM1/IGF1R/EPHA2/DDR1/EPHB6/ROS1/PDGFRB/FGFR2/FGFR3	14
1044	downregulated.Antt vs VC	Downregulated	Antt vs VC	MF	GO:0019199	Transmembrane receptor protein kinase activity	16/1116	79/18410	1.72116e-05	0.00140197	0.00125176	EFEMP1/NRP2/TYRO3/AXL/EPHB2/CRIM1/IGF1R/EPHA2/BMPR2/DDR1/EPHB6/TGFBR3/ROS1/PDGFRB/FGFR2/FGFR3	16
1045	downregulated.Antt vs VC	Downregulated	Antt vs VC	MF	GO:0019838	Growth factor binding	22/1116	139/18410	3.19402e-05	0.00238487	0.00212935	NRP2/CRIM1/IGF1R/FURIN/LTBP2/PDGFA/EPHA2/HYAL2/CCN1/IGFBPL1/LIFR/IGFBP3/PDGFB/COL4A1/TGFB3/TGFBR3/PDGFRB/FGFR2/THBS1/CCN2/FGFR3/FGFBP1	22
1046	downregulated.Antt vs VC	Downregulated	Antt vs VC	MF	GO:0106310	Protein serine kinase activity	42/1116	360/18410	3.60396e-05	0.00248396	0.00221782	SIK2/NEK6/BUB1B/MAP3K20/ROCK2/TRIO/MELK/MAP3K1/RPS6KA4/DAPK1/NEK2/MAPK12/AURKB/MAP3K14/KALRN/HASPIN/PASK/SGK1/CDK6/PLK4/CIT/SPEG/PBK/LIMK2/DYRK2/FAM20C/PKN3/RPS6KA1/NUAK2/CAMK4/NUAK1/CDK1/PLK1/CDC7/PKMYT1/CILK1/ALPK2/KSR2/CAMKK1/CDK2/DCLK2/PLK2	42
1047	downregulated.Antt vs VC	Downregulated	Antt vs VC	MF	GO:0015631	Tubulin binding	43/1116	376/18410	4.69553e-05	0.00300514	0.00268316	KIF3C/KIF23/KNSTRN/KIF18A/TTLL12/CENPE/SPAG5/KIF4A/DST/PSRC1/DLGAP5/MID1/ATF5/NEFH/NIN/KIFC1/KIF17/NEDD1/SKA2/CENPF/GTSE1/CRYAB/KIF20A/CCDC88A/NAV3/STARD9/DIXDC1/FHDC1/MTCL1/MAP7D3/STMN1/SPC24/PLK1/KATNAL1/KIF18B/EZR/GAS2L1/FAM83D/C10orf90/REEP1/DCLK2/UNC5C/LZTS1	43
1048	downregulated.Antt vs VC	Downregulated	Antt vs VC	MF	GO:0005160	Transforming growth factor beta receptor binding	8/1116	24/18410	5.45755e-05	0.00325998	0.00291069	TGFB1/FERMT2/SMAD3/BAMBI/TGFB3/TGFBR3/SMAD6/TGFB2	8
1049	downregulated.Antt vs VC	Downregulated	Antt vs VC	MF	GO:0004674	Protein serine/threonine kinase activity	46/1116	430/18410	0.000130481	0.00730695	0.00652406	SIK2/NEK6/GRK6/BUB1B/MAP3K20/ROCK2/TRIO/MELK/MAP3K1/RPS6KA4/DAPK1/NEK2/MAPK12/AURKB/MAP3K14/KALRN/BMPR2/MYLK/HASPIN/PASK/SGK1/CDK6/PLK4/CIT/SPEG/PBK/LIMK2/DYRK2/FAM20C/PKN3/RPS6KA1/NUAK2/CAMK4/NUAK1/CDK1/TGFBR3/PLK1/CDC7/PKMYT1/CILK1/ALPK2/KSR2/CAMKK1/CDK2/DCLK2/PLK2	46
1050	downregulated.Antt vs VC	Downregulated	Antt vs VC	MF	GO:0051371	Muscle alpha-actinin binding	6/1116	15/18410	0.000152423	0.00803357	0.00717283	PDLIM1/PDLIM5/PDLIM7/PALLD/LDB3/MYPN	6
1051	downregulated.Antt vs VC	Downregulated	Antt vs VC	MF	GO:0005178	Integrin binding	22/1116	156/18410	0.000185137	0.0092157	0.0082283	COL16A1/EMP2/ACTN1/FRMD5/MYH9/DST/HMGB1/NF2/TGFBI/FERMT2/CCN1/ITGA7/ACTN4/LAMA5/GFRA1/SEMA7A/PLPP3/THBS1/CCN2/ITGB8/FGF1/NRG1	22
1052	downregulated.Antt vs VC	Downregulated	Antt vs VC	MF	GO:0019207	Kinase regulator activity	29/1116	235/18410	0.000215394	0.0101575	0.00906922	NCAPG2/CCNB2/CDKN2B/CALM3/KAT2B/CCNB1/SOCS6/HYAL2/SOCS3/MALT1/PRKAR2B/BMPR2/GAS6/SOCS2/INCENP/CDKN2C/CIT/MOB3B/HSPB1/EGF/CCND1/CD24/CCNA2/PIK3R3/SFN/CCNF/GPRC5A/CCNE2/NRG1	29
1053	downregulated.Antt vs VC	Downregulated	Antt vs VC	MF	GO:0008083	Growth factor activity	22/1116	162/18410	0.000319206	0.0143004	0.0127682	EFEMP1/GDF11/TGFB1/PDGFA/HBEGF/CLCF1/PDGFB/EGF/TGFB3/PDGFC/VEGFC/FGF5/KITLG/BDNF/NTF3/CCN2/NTF4/FGF1/INHBA/NRG1/TGFB2/BMP4	22
1054	downregulated.Antt vs VC	Downregulated	Antt vs VC	MF	GO:0030165	Pdz domain binding	14/1116	82/18410	0.000381365	0.015996	0.0142822	CRIM1/CADM1/FZD7/ARHGAP29/BAIAP2/SDC2/PLEKHA2/FZD4/SSTR2/CIT/FZD2/ATP2B4/TGFBR3/NKD1	14
1055	downregulated.Antt vs VC	Downregulated	Antt vs VC	MF	GO:0050840	Extracellular matrix binding	11/1116	55/18410	0.00039276	0.015996	0.0142822	AGRN/TGFBI/PLEKHA2/CCN1/THSD1/ITGA7/ADGRG6/ADAMTS15/THBS1/OLFML2B/TINAGL1	11
1056	downregulated.Antt vs VC	Downregulated	Antt vs VC	MF	GO:0008094	Atp-dependent activity, acting on dna	16/1116	103/18410	0.000456512	0.0177841	0.0158787	RAD54L/MCM3/MCM2/ATAD5/XRCC3/TTF2/BLM/ERCC6L/DNA2/TOP2A/PIF1/ERCC2/RAD51/MCM5/RAD54B/BRIP1	16
1057	downregulated.Antt vs VC	Downregulated	Antt vs VC	MF	GO:0098641	Cadherin binding involved in cell-cell adhesion	6/1116	18/18410	0.000483025	0.0180329	0.0161008	ANXA2/PDLIM1/BAIAP2/PDLIM5/CNN3/PKP3	6
1058	downregulated.Antt vs VC	Downregulated	Antt vs VC	MF	GO:0004713	Protein tyrosine kinase activity	19/1116	135/18410	0.000508127	0.0182113	0.01626	EFEMP1/NRP2/TYRO3/AXL/EPHB2/CRIM1/IGF1R/MELK/PEAK1/EPHA2/DDR1/PBK/DYRK2/EPHB6/ROS1/WEE1/PDGFRB/FGFR2/FGFR3	19
1059	downregulated.Antt vs VC	Downregulated	Antt vs VC	MF	GO:0003714	Transcription corepressor activity	24/1116	191/18410	0.000559964	0.0192972	0.0172297	PPP1R13L/ATN1/ATF7IP/PAWR/JAZF1/AJUBA/SUFU/CDYL2/LMCD1/HMGB1/BCOR/TBL1XR1/EZH2/GMNN/ANKRD1/TLE3/CITED2/BASP1/WTIP/FHL2/BCL3/CCND1/TRERF1/TLE4	24
1060	downregulated.Antt vs VC	Downregulated	Antt vs VC	MF	GO:0050998	Nitric-oxide synthase binding	5/1116	13/18410	0.000692811	0.02217	0.0197946	CALM3/DMD/ACTB/ATP2B4/CAV1	5
1061	downregulated.Antt vs VC	Downregulated	Antt vs VC	MF	GO:0099186	Structural constituent of postsynapse	5/1116	13/18410	0.000692811	0.02217	0.0197946	ACTN1/NEFH/NEFL/ACTB/ACTG1	5
1062	downregulated.Antt vs VC	Downregulated	Antt vs VC	MF	GO:0019887	Protein kinase regulator activity	25/1116	207/18410	0.000782881	0.0241883	0.0215967	NCAPG2/CCNB2/CDKN2B/CALM3/KAT2B/CCNB1/HYAL2/SOCS3/PRKAR2B/BMPR2/GAS6/INCENP/CDKN2C/CIT/MOB3B/HSPB1/EGF/CCND1/CD24/CCNA2/SFN/CCNF/GPRC5A/CCNE2/NRG1	25
1063	downregulated.Antt vs VC	Downregulated	Antt vs VC	MF	GO:0140297	Dna-binding transcription factor binding	46/1116	470/18410	0.000930129	0.0277799	0.0248035	NUCKS1/NCAPG2/PCNA/NEK6/RXRA/DACT1/KAT2B/HMGB2/TGFB1I1/STAT5B/RARG/CBX5/HIF1A/WFS1/HMGB1/TBX2/BCOR/SOX9/SRF/GMNN/FKBP4/CENPF/ANKRD1/RUNX2/CITED2/MDFIC/PITX1/SMAD3/ACTB/HSPB1/NKX2-5/HES6/ETS2/FHL2/EXOSC9/ACTN4/ZNF703/BCL3/PITX2/ID3/NKX3-1/GAS2L1/E2F1/TRERF1/TLE4/ATOH8	46
1064	downregulated.Antt vs VC	Downregulated	Antt vs VC	MF	GO:0003712	Transcription coregulator activity	48/1116	497/18410	0.000968939	0.0278074	0.024828	NUCKS1/PPP1R13L/ATN1/JADE1/ATF7IP/PAWR/LPIN1/CBFB/PXN/JAZF1/AJUBA/KAT2B/TRIM14/HMGB2/TGFB1I1/SUFU/CDYL2/ACTN1/LMCD1/HDGFL2/PDLIM1/HMGB1/HYAL2/MRTFA/BCOR/NOTCH1/TBL1XR1/MRTFB/EZH2/FHL3/GMNN/DPF1/ANKRD1/TLE3/ZBED1/MAML2/CITED2/BASP1/WTIP/FHL2/ACTN4/BCL3/CCND1/ARID5B/WWC1/TRERF1/TLE4/NRG1	48
1065	downregulated.Antt vs VC	Downregulated	Antt vs VC	MF	GO:0005161	Platelet-derived growth factor receptor binding	5/1116	14/18410	0.00102416	0.0278074	0.024828	PDGFA/PDGFB/PDGFC/PDGFRB/PTPRJ	5
1066	downregulated.Antt vs VC	Downregulated	Antt vs VC	MF	GO:0070411	I-smad binding	5/1116	14/18410	0.00102416	0.0278074	0.024828	TGFB1I1/SMAD3/SMAD9/AXIN2/SMAD6	5
1067	downregulated.Antt vs VC	Downregulated	Antt vs VC	MF	GO:0051393	Alpha-actinin binding	7/1116	28/18410	0.00113353	0.0298719	0.0266713	CACNA1C/PDLIM1/PDLIM5/PDLIM7/PALLD/LDB3/MYPN	7
1068	downregulated.Antt vs VC	Downregulated	Antt vs VC	MF	GO:0003678	Dna helicase activity	12/1116	72/18410	0.00121553	0.0311176	0.0277836	RAD54L/MCM3/MCM2/BLM/ERCC6L/DNA2/PIF1/ERCC2/RAD51/MCM5/RAD54B/BRIP1	12
1069	downregulated.Antt vs VC	Downregulated	Antt vs VC	MF	GO:0098632	Cell-cell adhesion mediator activity	10/1116	54/18410	0.00133803	0.0325534	0.0290655	ANXA2/PDLIM1/BAIAP2/PDLIM5/CNN3/SIRPA/PALLD/PKP3/NEXN/MYPN	10
1070	downregulated.Antt vs VC	Downregulated	Antt vs VC	MF	GO:0001216	Dna-binding transcription activator activity	45/1116	466/18410	0.00137848	0.0325534	0.0290655	KLF6/MEIS2/STAT5B/HIF1A/TFDP2/FOSL2/ATF5/FLI1/GLIS3/CASZ1/ZNF43/SOX9/TFAP2C/FOXD1/SRF/RUNX2/ZBED1/MECOM/KLF10/GLIS1/PITX1/SMAD3/MITF/NKX2-5/MYBL2/IRX3/FOXC2/TEF/HOXA13/ALX4/NFIB/TEAD4/FOXF2/PBX3/SIX2/E2F1/E2F2/LHX2/SOX18/TCF4/MYBL1/SOX4/CREB3L1/POU2F3/DLX5	45
1071	downregulated.Antt vs VC	Downregulated	Antt vs VC	MF	GO:0072341	Modified amino acid binding	14/1116	93/18410	0.00138539	0.0325534	0.0290655	ANXA6/AXL/LANCL1/ASAP1/DHFR/ANXA2/HMGB1/OSBPL10/FASN/GAS6/TYMS/JPH2/THBS1/SYT15	14
1072	downregulated.Antt vs VC	Downregulated	Antt vs VC	MF	GO:0043548	Phosphatidylinositol 3-kinase binding	7/1116	29/18410	0.00141695	0.0325534	0.0290655	TYRO3/AXL/CALM3/IGF1R/GSN/PDGFRB/IRS1	7
1073	downregulated.Antt vs VC	Downregulated	Antt vs VC	MF	GO:0042826	Histone deacetylase binding	17/1116	126/18410	0.00157435	0.0352653	0.0314869	DACT1/KAT2B/CBX5/HIF1A/TBX2/BCOR/SRF/GLI3/GMNN/CDC20/ANKRD1/KPNA2/TOP2A/BCL3/CCND1/NKX3-1/PRDM1	17
1074	downregulated.Antt vs VC	Downregulated	Antt vs VC	MF	GO:0030695	Gtpase regulator activity	46/1116	488/18410	0.00199107	0.0400206	0.0357327	RANGAP1/HACD3/SIPA1L2/IQSEC1/ASAP1/RIN2/TRIO/SWAP70/ARHGEF40/STARD13/RIN3/ECT2/ITSN1/ASAP3/MTSS2/IQGAP3/ARHGAP11A/TBC1D1/ARHGAP23/CYTH3/ARHGAP29/DEPDC1B/RIN1/KALRN/DENND2B/ARHGAP31/SH3BP4/PLCE1/ARHGEF39/DOCK2/DOCK10/CCDC88A/ARHGAP42/ARHGAP28/EPS8L2/EGF/TBXA2R/BCAR3/PLEKHG2/ARHGEF26/STARD8/SIRPA/TIAM2/ARHGAP33/RGS4/PLEKHG4	46
1075	downregulated.Antt vs VC	Downregulated	Antt vs VC	MF	GO:0060589	Nucleoside-triphosphatase regulator activity	46/1116	488/18410	0.00199107	0.0400206	0.0357327	RANGAP1/HACD3/SIPA1L2/IQSEC1/ASAP1/RIN2/TRIO/SWAP70/ARHGEF40/STARD13/RIN3/ECT2/ITSN1/ASAP3/MTSS2/IQGAP3/ARHGAP11A/TBC1D1/ARHGAP23/CYTH3/ARHGAP29/DEPDC1B/RIN1/KALRN/DENND2B/ARHGAP31/SH3BP4/PLCE1/ARHGEF39/DOCK2/DOCK10/CCDC88A/ARHGAP42/ARHGAP28/EPS8L2/EGF/TBXA2R/BCAR3/PLEKHG2/ARHGEF26/STARD8/SIRPA/TIAM2/ARHGAP33/RGS4/PLEKHG4	46
1076	downregulated.Antt vs VC	Downregulated	Antt vs VC	MF	GO:0017116	Single-stranded dna helicase activity	6/1116	23/18410	0.00202331	0.0400206	0.0357327	MCM3/MCM2/DNA2/PIF1/RAD51/MCM5	6
1077	downregulated.Antt vs VC	Downregulated	Antt vs VC	MF	GO:0001228	Dna-binding transcription activator activity, rna polymerase ii-specific	44/1116	462/18410	0.00202542	0.0400206	0.0357327	KLF6/MEIS2/STAT5B/HIF1A/TFDP2/FOSL2/ATF5/FLI1/GLIS3/CASZ1/ZNF43/SOX9/TFAP2C/FOXD1/SRF/RUNX2/ZBED1/MECOM/KLF10/GLIS1/PITX1/SMAD3/MITF/NKX2-5/MYBL2/IRX3/FOXC2/TEF/HOXA13/ALX4/NFIB/TEAD4/FOXF2/PBX3/SIX2/E2F2/LHX2/SOX18/TCF4/MYBL1/SOX4/CREB3L1/POU2F3/DLX5	44
1078	downregulated.Antt vs VC	Downregulated	Antt vs VC	MF	GO:0005522	Profilin binding	4/1116	10/18410	0.00209929	0.0400206	0.0357327	DBN1/VASP/ENAH/ACTG1	4
1079	downregulated.Antt vs VC	Downregulated	Antt vs VC	MF	GO:0034713	Type i transforming growth factor beta receptor binding	4/1116	10/18410	0.00209929	0.0400206	0.0357327	TGFB1/FERMT2/TGFB3/SMAD6	4
1080	downregulated.Antt vs VC	Downregulated	Antt vs VC	MF	GO:0043139	5'-3' dna helicase activity	4/1116	10/18410	0.00209929	0.0400206	0.0357327	DNA2/PIF1/ERCC2/BRIP1	4
1081	downregulated.Antt vs VC	Downregulated	Antt vs VC	MF	GO:0005085	Guanyl-nucleotide exchange factor activity	25/1116	223/18410	0.00224015	0.0418162	0.0373359	IQSEC1/RIN2/TRIO/SWAP70/ARHGEF40/RIN3/ECT2/ITSN1/CYTH3/RIN1/KALRN/DENND2B/PLCE1/ARHGEF39/DOCK2/DOCK10/CCDC88A/EPS8L2/EGF/TBXA2R/BCAR3/PLEKHG2/ARHGEF26/TIAM2/PLEKHG4	25
1082	downregulated.Antt vs VC	Downregulated	Antt vs VC	MF	GO:0005518	Collagen binding	11/1116	68/18410	0.00245153	0.044828	0.040025	CD44/ANTXR1/PDGFA/TGFBI/DDR1/SMAD3/PDGFB/ADGRG6/COL5A3/CCBE1/THBS1	11
1083	downregulated.Antt vs VC	Downregulated	Antt vs VC	MF	GO:0000400	Four-way junction dna binding	5/1116	17/18410	0.00271813	0.0477539	0.0426374	HMGB2/HMGB1/XRCC3/BLM/HMGB3	5
1084	downregulated.Antt vs VC	Downregulated	Antt vs VC	MF	GO:0008301	Dna binding, bending	5/1116	17/18410	0.00271813	0.0477539	0.0426374	HMGB2/HMGB1/FOXD1/HMGB3/TOP2A	5
1085	downregulated.Antt vs VC	Downregulated	Antt vs VC	MF	GO:0016538	Cyclin-dependent protein serine/threonine kinase regulator activity	9/1116	50/18410	0.00282004	0.0481439	0.0429856	CCNB2/CDKN2B/KAT2B/CCNB1/CDKN2C/CCND1/CCNA2/CCNF/CCNE2	9
1086	downregulated.Antt vs VC	Downregulated	Antt vs VC	MF	GO:0003774	Cytoskeletal motor activity	15/1116	111/18410	0.0028478	0.0481439	0.0429856	KIF3C/KIF23/MYO1E/MYO1B/KIF18A/CENPE/KIF4A/MYH9/KIFC1/KIF17/MYH2/KIF20A/STARD9/KIF18B/MYO7B	15
1087	downregulated.??-T3 vs VC	Downregulated	??-T3 vs VC	BP	GO:0001503	Ossification	93/1437	420/18800	3.06844e-21	9.1117e-18	6.51011e-18	YAP1/RBMX/LIMD1/CBFB/COL13A1/FBXO5/RRAS2/HIF1A/PPARGC1B/WWTR1/TPM4/SMO/H3-3A/KREMEN1/TCIRG1/GJA1/SRGN/LRP4/LRP5/SUFU/MAPK11/PLXNB1/SNAI1/SFRP1/FASN/THRA/MN1/TGFB1/RUNX1/CRIM1/TMEM64/GLI3/ADAMTS7/FHL2/CSGALNACT1/BCOR/CTNNBIP1/FERMT2/SLC24A3/XYLT1/NOTCH1/BMPR2/PTCH1/FZD1/CDK6/MSX2/AXIN2/EPHA2/SLC8A1/CCN4/RUNX2/EBP/CSF1/PHOSPHO1/ADAMTS12/TGFB3/BAMBI/ERCC2/SOX9/GLI2/FOXC2/RFLNB/KLF10/TENT5A/PDLIM7/SI…	93
1088	downregulated.??-T3 vs VC	Downregulated	??-T3 vs VC	BP	GO:0007015	Actin filament organization	97/1437	450/18800	3.20778e-21	9.1117e-18	6.51011e-18	ACTR3/TRIOBP/COTL1/MYO1E/DBN1/PAWR/VASP/ARPC5/LIMCH1/FLNA/DLC1/MICALL2/ACTN1/SVIL/CORO1C/CARMIL1/PPARGC1B/ADD2/ROCK2/ASAP3/MYO1B/BCAR1/BAIAP2/EMP2/EPS8/TPM4/HMCN1/EVL/PXN/MICAL3/GSN/CIT/SPTAN1/KIRREL1/MCU/ZYX/LPAR1/TMSB10/SFRP1/MET/FHOD3/SHANK3/PDLIM1/SPTB/PLEC/ARHGAP28/NF2/FERMT2/ENAH/SRF/ARPIN/WDR1/CCDC88A/SHROOM2/TMOD2/STMN1/CARMIL2/FSCN1/RHOBTB1/RHOBTB3/FHDC1/PLEKHG2/HIP1/FAT1/CGNL1/NEDD9/TPM…	97
1089	downregulated.??-T3 vs VC	Downregulated	??-T3 vs VC	BP	GO:0001655	Urogenital system development	82/1437	352/18800	2.61943e-20	4.96032e-17	3.54404e-17	YAP1/CENPF/MYO1E/NID1/ANXA1/EPHB2/GREB1L/FBN1/WWTR1/SMO/SIX1/MMP17/LRP4/FKBP4/SDC1/SFRP1/IRX3/GDF11/GLI3/CTNNBIP1/RARG/HOXA10/PLCE1/MYC/FOXD1/BASP1/PDGFA/NOTCH1/PTCH1/PDGFRA/HES1/TNS2/HOXB13/PODXL/HOXA13/HYAL2/ANGPT1/HOXC11/PLXND1/CD24/SOX9/GLI2/FOXC2/GCNT1/SLIT2/LHX1/KIRREL3/GFRA1/HELLS/PDGFB/SIX2/NOTCH3/SMAD3/FGFR2/ACTA2/PDGFRB/PCSK9/WNT5A/NKX3-1/ARID5B/BICC1/EFNB2/LAMA5/RARB/SERPINB7/COL4A1/SA…	82
1090	downregulated.??-T3 vs VC	Downregulated	??-T3 vs VC	BP	GO:0072001	Renal system development	75/1437	312/18800	1.62412e-19	2.30666e-16	1.64805e-16	YAP1/CENPF/MYO1E/NID1/GREB1L/FBN1/WWTR1/SMO/SIX1/MMP17/LRP4/SDC1/SFRP1/IRX3/GDF11/GLI3/CTNNBIP1/PLCE1/MYC/FOXD1/BASP1/PDGFA/NOTCH1/PTCH1/PDGFRA/HES1/TNS2/PODXL/HYAL2/ANGPT1/HOXC11/PLXND1/CD24/SOX9/GLI2/FOXC2/GCNT1/SLIT2/LHX1/KIRREL3/GFRA1/HELLS/PDGFB/SIX2/NOTCH3/SMAD3/FGFR2/ACTA2/PDGFRB/PCSK9/WNT5A/NKX3-1/ARID5B/BICC1/EFNB2/LAMA5/RARB/SERPINB7/COL4A1/SALL1/SMAD7/KANK2/BMPER/FGF1/LIN28A/PRDM1/WNT7…	75
1091	downregulated.??-T3 vs VC	Downregulated	??-T3 vs VC	BP	GO:0001822	Kidney development	73/1437	303/18800	4.36122e-19	4.95522e-16	3.54039e-16	YAP1/CENPF/MYO1E/NID1/GREB1L/FBN1/WWTR1/SMO/SIX1/MMP17/LRP4/SDC1/SFRP1/IRX3/GDF11/GLI3/CTNNBIP1/PLCE1/MYC/FOXD1/BASP1/PDGFA/NOTCH1/PTCH1/PDGFRA/HES1/TNS2/PODXL/HYAL2/ANGPT1/HOXC11/PLXND1/CD24/SOX9/GLI2/FOXC2/GCNT1/SLIT2/LHX1/KIRREL3/GFRA1/HELLS/PDGFB/SIX2/NOTCH3/SMAD3/FGFR2/ACTA2/PDGFRB/PCSK9/WNT5A/NKX3-1/ARID5B/BICC1/EFNB2/LAMA5/RARB/SERPINB7/SALL1/SMAD7/KANK2/BMPER/FGF1/LIN28A/PRDM1/WNT7B/CYP26…	73
1092	downregulated.??-T3 vs VC	Downregulated	??-T3 vs VC	BP	GO:0061572	Actin filament bundle organization	49/1437	162/18800	1.61115e-17	1.52549e-14	1.08993e-14	PAWR/LIMCH1/FLNA/DLC1/ACTN1/CARMIL1/ADD2/ROCK2/ASAP3/MYO1B/BAIAP2/EPS8/EVL/PXN/ZYX/LPAR1/SFRP1/MET/SHANK3/PDLIM1/ARHGAP28/NF2/FERMT2/SRF/CCDC88A/STMN1/FSCN1/FHDC1/CGNL1/NEDD9/TGFB3/PHLDB2/EZR/FMN2/RFLNB/MARCKS/FAM171A1/LIMA1/SMAD3/S100A10/S1PR1/SYNPO/ACTG1/CALD1/TPM1/ZNF664-RFLNA/SYNPO2L/CCN2/ID1	49
1093	downregulated.??-T3 vs VC	Downregulated	??-T3 vs VC	BP	GO:0042060	Wound healing	86/1437	429/18800	7.02817e-17	5.70386e-14	4.07528e-14	YAP1/PPIA/ITPK1/MYL12A/CD44/ELK3/ANXA1/EPHB2/MYL9/AJAP1/FLNA/TLR4/DGKH/HIF1A/CD59/TYRO3/TNFRSF12A/DST/ERBB2/SCRIB/AXL/HPSE/MYH9/AJUBA/DCBLD2/MRTFA/ITGA5/SDC1/TGFB1/UBASH3B/GLI3/CLDN4/PLEC/FERMT2/TFPI/HSPB1/SRF/SYTL4/ARHGAP24/PDGFA/DDR1/MYLK/COL5A1/HBEGF/PDGFRA/CARMIL2/MSX2/FZD7/CCN4/GAS6/RAP2B/ACTB/TGFB3/ST3GAL4/CNN2/PHLDB2/FOXC2/VCL/TBXA2R/PDGFB/SERPINE1/ANXA8/SMAD3/FGFR2/ACTA2/PDGFRB/PLAT/WNT5A…	86
1094	downregulated.??-T3 vs VC	Downregulated	??-T3 vs VC	BP	GO:0061564	Axon development	92/1437	479/18800	9.92512e-17	7.04808e-14	5.03569e-14	ALCAM/NIBAN2/CDH2/DBN1/EFNB1/VASP/EPHB2/CNP/NUMBL/NRXN3/FLNA/SLC9A6/SKIL/PTPRF/NDN/EFNA5/ERBB2/TRIO/NEO1/BAIAP2/FLRT2/SMO/NEFH/NTNG1/SEMA3F/KREMEN1/LRP4/KALRN/PLXNA2/NRP2/BOC/SEMA4F/PLXNB1/GLI3/DHFR/PLXNA1/ENAH/SRF/NIN/VAX1/SCN1B/IGF1R/FOXD1/DDR1/NOTCH1/BMPR2/TUBB3/PTCH1/PLP1/GBX2/LAMA2/STMN1/EMB/EPHA2/NEFL/AUTS2/FEZ2/NECTIN1/ACTB/AMIGO1/PLXND1/EPHB6/GLI2/VCL/SLIT2/PALLD/LHX1/UNC5C/PAX6/NOTCH3/FG…	92
1095	downregulated.??-T3 vs VC	Downregulated	??-T3 vs VC	BP	GO:0001667	Ameboidal-type cell migration	92/1437	480/18800	1.13916e-16	7.19065e-14	5.13756e-14	SPARC/CDH2/EFNB1/ANXA1/AKT3/HIF1A/CORO1C/IQSEC1/ROCK2/BCAR1/EMP2/SMO/SEMA3F/TNS1/EVL/PXN/GJA1/TNFSF12/LRP5/MYH9/NRP2/SEMA4F/HMGB1/TGFB1/MET/STARD13/PDLIM1/PLEC/HSPB1/SRF/RIN2/PIK3R3/ANLN/NOTCH1/BMPR2/SMURF2/HBEGF/GBX2/PKN3/PIK3CD/GLUL/JCAD/EPHA2/SLC8A1/HYAL2/ANGPT1/AKAP12/FSTL1/PLXND1/SOX9/FOXC2/SLIT2/TBXA2R/KITLG/DAAM2/EGF/AMOTL2/GLIPR2/PDGFB/RHOB/ACTA2/ATP2B4/WNT5A/ARID5B/ARHGDIB/EFNB2/RHOJ/LAM…	92
1096	downregulated.??-T3 vs VC	Downregulated	??-T3 vs VC	BP	GO:0051017	Actin filament bundle assembly	47/1437	158/18800	1.52684e-16	8.67396e-14	6.19735e-14	PAWR/LIMCH1/FLNA/DLC1/ACTN1/CARMIL1/ADD2/ROCK2/ASAP3/MYO1B/BAIAP2/EPS8/EVL/PXN/ZYX/LPAR1/SFRP1/MET/SHANK3/PDLIM1/ARHGAP28/NF2/FERMT2/SRF/CCDC88A/STMN1/FSCN1/FHDC1/CGNL1/NEDD9/TGFB3/PHLDB2/EZR/FMN2/MARCKS/FAM171A1/LIMA1/SMAD3/S100A10/S1PR1/SYNPO/ACTG1/CALD1/TPM1/SYNPO2L/CCN2/ID1	47
1097	downregulated.??-T3 vs VC	Downregulated	??-T3 vs VC	BP	GO:0031032	Actomyosin structure organization	53/1437	199/18800	3.49205e-16	1.80349e-13	1.28855e-13	EPB41L1/EPB41L2/OBSL1/MYL9/LIMCH1/FRMD5/DLC1/CARMIL1/ROCK2/ASAP3/EVL/PXN/CIT/MYH9/ZYX/LPAR1/SFRP1/MET/FHOD3/PDLIM1/PLEC/ARHGAP28/NF2/FERMT2/SRF/WDR1/ANLN/CCDC88A/CNN3/TMOD2/PDGFRA/STMN1/FHDC1/CGNL1/TGFB3/CNN2/PHLDB2/FRMD6/FAM171A1/SMAD3/S100A10/S1PR1/PDGFRB/ANKRD1/ACTG1/CNN1/LDB3/TPM1/FRMD3/SYNPO2L/MYPN/CCN2/EDN1	53
1098	downregulated.??-T3 vs VC	Downregulated	??-T3 vs VC	BP	GO:0060070	Canonical wnt signaling pathway	69/1437	313/18800	5.85492e-16	2.66618e-13	1.90493e-13	YAP1/TBL1X/CDH2/LIMD1/HDAC1/SOX13/PTPRU/TLE5/DACT1/WWTR1/KREMEN1/FZD8/LRP4/LRP5/JRK/SDC1/SFRP1/TGFB1/CAPRIN2/TMEM64/GLI3/ASPM/CTNNBIP1/ZNF703/TLE3/RARG/NOTCH1/TCF7L2/SMURF2/WNT9A/FZD1/TBL1XR1/FZD2/AXIN2/FZD7/RBMS3/MITF/TMEM131L/BAMBI/FZD4/SOX9/TCF7L1/DAAM2/EGF/SMAD3/RECK/FGFR2/DIXDC1/WNT5A/CTNND2/BICC1/PRICKLE1/KANK1/COL1A1/TLE4/WNT7A/CAV1/WNT3/WNT5B/SNAI2/LYPD6/PLPP3/WNT7B/NKD1/LGR5/LGR4/SOX4/DL…	69
1099	downregulated.??-T3 vs VC	Downregulated	??-T3 vs VC	BP	GO:0016055	Wnt signaling pathway	87/1437	452/18800	6.1011e-16	2.66618e-13	1.90493e-13	YAP1/TBL1X/SMARCA4/CDH2/ROR1/LIMD1/HDAC1/SOX13/PTPRU/GRK6/TLE5/DACT1/TMEM237/WWTR1/DEPDC1B/KREMEN1/FZD8/LRP4/LRP5/JRK/SDC1/SFRP1/TGFB1/CAPRIN2/TMEM64/GLI3/ASPM/CTNNBIP1/ZNF703/FERMT2/TLE3/RARG/NOTCH1/TCF7L2/SMURF2/WNT9A/FZD1/TBL1XR1/FZD2/AXIN2/FZD7/RBMS3/MITF/VANGL1/CCN4/TMEM131L/MDFIC/BAMBI/FZD4/APCDD1L/CD24/SOX9/TCF7L1/DAAM2/EGF/NXN/AMOTL2/SMAD3/RECK/FGFR2/DIXDC1/KREMEN2/WNT5A/CTNND2/BICC1/PRIC…	87
1100	downregulated.??-T3 vs VC	Downregulated	??-T3 vs VC	BP	GO:0007409	Axonogenesis	84/1437	430/18800	8.01365e-16	3.04465e-13	2.17534e-13	ALCAM/NIBAN2/CDH2/DBN1/EFNB1/VASP/EPHB2/CNP/NUMBL/NRXN3/SLC9A6/SKIL/NDN/EFNA5/ERBB2/TRIO/NEO1/BAIAP2/FLRT2/SMO/NEFH/NTNG1/SEMA3F/LRP4/KALRN/PLXNA2/NRP2/BOC/SEMA4F/PLXNB1/GLI3/PLXNA1/ENAH/SRF/NIN/VAX1/SCN1B/IGF1R/FOXD1/NOTCH1/BMPR2/TUBB3/PTCH1/GBX2/LAMA2/STMN1/EMB/EPHA2/NEFL/AUTS2/FEZ2/NECTIN1/ACTB/AMIGO1/PLXND1/EPHB6/GLI2/VCL/SLIT2/PALLD/LHX1/UNC5C/PAX6/NOTCH3/FGFR2/DIXDC1/WNT5A/NFIB/NEXN/EFNB2/L…	84
1101	downregulated.??-T3 vs VC	Downregulated	??-T3 vs VC	BP	GO:0198738	Cell-cell signaling by wnt	87/1437	454/18800	8.03904e-16	3.04465e-13	2.17534e-13	YAP1/TBL1X/SMARCA4/CDH2/ROR1/LIMD1/HDAC1/SOX13/PTPRU/GRK6/TLE5/DACT1/TMEM237/WWTR1/DEPDC1B/KREMEN1/FZD8/LRP4/LRP5/JRK/SDC1/SFRP1/TGFB1/CAPRIN2/TMEM64/GLI3/ASPM/CTNNBIP1/ZNF703/FERMT2/TLE3/RARG/NOTCH1/TCF7L2/SMURF2/WNT9A/FZD1/TBL1XR1/FZD2/AXIN2/FZD7/RBMS3/MITF/VANGL1/CCN4/TMEM131L/MDFIC/BAMBI/FZD4/APCDD1L/CD24/SOX9/TCF7L1/DAAM2/EGF/NXN/AMOTL2/SMAD3/RECK/FGFR2/DIXDC1/KREMEN2/WNT5A/CTNND2/BICC1/PRIC…	87
1102	downregulated.??-T3 vs VC	Downregulated	??-T3 vs VC	BP	GO:0060485	Mesenchyme development	67/1437	301/18800	9.3486e-16	3.31934e-13	2.37159e-13	YAP1/EZH2/CDH2/EFNB1/ENG/FLNA/HIF1A/CORO1C/ZFP36L1/ROCK2/WWTR1/TBX2/SMO/SEMA3F/SIX1/NRP2/PHLDB1/SEMA4F/SNAI1/SFRP1/TGFB1/TBX3/ZNF703/FERMT2/MYC/FOXD1/BASP1/NOTCH1/TCF7L2/BMPR2/GBX2/HES1/MSX2/AXIN2/BNC2/HMGA2/RBM24/TGFB3/CITED2/BAMBI/PHLDB2/SOX9/FOXC2/KITLG/RFLNB/FOXF2/FAM83D/GLIPR2/SIX2/SMAD3/FGFR2/TEAD2/ACTA2/PDGFRB/TGFBR3/WNT5A/LAMA5/SEMA3C/COL1A1/SMAD7/SEMA7A/PITX2/NRG1/SNAI2/TGFB2/BMP4/EDN1	67
1103	downregulated.??-T3 vs VC	Downregulated	??-T3 vs VC	BP	GO:0061138	Morphogenesis of a branching epithelium	50/1437	185/18800	1.26348e-15	4.22224e-13	3.0167e-13	YAP1/ENG/GREB1L/TBX2/SMO/SIX1/LRP5/SFRP1/MET/GLI3/TBX3/PLXNA1/CTNNBIP1/SRF/MYC/FOXD1/PDGFA/DDR1/NOTCH1/PTCH1/GBX2/MSX2/EPHA2/ADM/HOXB13/HOXA13/CSF1/PLXND1/SOX9/GLI2/FOXC2/SLIT2/LHX1/EGF/SOCS3/SIX2/FGFR2/WNT5A/NKX3-1/TGM2/LAMA5/SEMA3C/COL4A1/SALL1/SNAI2/FGF1/HHIP/LGR4/BMP4/EDN1	50
1104	downregulated.??-T3 vs VC	Downregulated	??-T3 vs VC	BP	GO:0001763	Morphogenesis of a branching structure	52/1437	199/18800	1.57654e-15	4.97574e-13	3.55505e-13	YAP1/COL13A1/ENG/GREB1L/TBX2/SMO/SIX1/LRP5/SFRP1/MET/GLI3/TBX3/PLXNA1/CTNNBIP1/SRF/MYC/FOXD1/PDGFA/DDR1/NOTCH1/PTCH1/GBX2/MSX2/EPHA2/ADM/HOXB13/HOXA13/CSF1/PLXND1/SOX9/GLI2/FOXC2/SLIT2/LHX1/EGF/SOCS3/SIX2/FGFR2/WNT5A/NKX3-1/TGM2/LAMA5/SEMA3C/COL4A1/SALL1/SNAI2/FGF1/PRDM1/HHIP/LGR4/BMP4/EDN1	52
1105	downregulated.??-T3 vs VC	Downregulated	??-T3 vs VC	BP	GO:0007411	Axon guidance	57/1437	234/18800	2.05428e-15	5.95772e-13	4.25666e-13	ALCAM/NIBAN2/EFNB1/VASP/EPHB2/NRXN3/EFNA5/ERBB2/TRIO/NEO1/FLRT2/SMO/SEMA3F/KALRN/PLXNA2/NRP2/BOC/SEMA4F/PLXNB1/GLI3/PLXNA1/ENAH/VAX1/SCN1B/FOXD1/NOTCH1/BMPR2/TUBB3/PTCH1/GBX2/LAMA2/EMB/EPHA2/FEZ2/NECTIN1/PLXND1/EPHB6/GLI2/SLIT2/PALLD/LHX1/UNC5C/PAX6/NOTCH3/WNT5A/NFIB/NEXN/EFNB2/LAMA5/SEMA3C/PLXNA4/BDNF/SEMA7A/WNT3/MYPN/DLX5/EDN1	57
1106	downregulated.??-T3 vs VC	Downregulated	??-T3 vs VC	BP	GO:0060562	Epithelial tube morphogenesis	70/1437	328/18800	2.09742e-15	5.95772e-13	4.25666e-13	YAP1/VASP/ENG/GREB1L/HIF1A/DLC1/SCRIB/TBX2/SMO/SIX1/GJA1/LRP5/SUFU/SFRP1/IRX3/TGFB1/MET/GLI3/TBX3/STARD13/CTNNBIP1/LUZP1/SRF/RARG/MYC/FOXD1/DDR1/NOTCH1/PTCH1/GBX2/FZD1/FZD2/PIK3CD/HES1/MSX2/EPHA2/ADM/PODXL/CSF1/ADAMTS12/CITED2/PLXND1/SOX9/GLI2/FOXC2/SLIT2/LHX1/EGF/RHOB/SIX2/SMAD3/FGFR2/TEAD2/WNT5A/NKX3-1/PRICKLE1/EFNB2/LAMA5/SHROOM3/COL4A1/SALL1/FGF1/HHIP/SOX18/LGR5/LGR4/TGFB2/SOX4/BMP4/EDN1	70
1107	downregulated.??-T3 vs VC	Downregulated	??-T3 vs VC	BP	GO:0097485	Neuron projection guidance	57/1437	235/18800	2.5151e-15	6.80395e-13	4.86127e-13	ALCAM/NIBAN2/EFNB1/VASP/EPHB2/NRXN3/EFNA5/ERBB2/TRIO/NEO1/FLRT2/SMO/SEMA3F/KALRN/PLXNA2/NRP2/BOC/SEMA4F/PLXNB1/GLI3/PLXNA1/ENAH/VAX1/SCN1B/FOXD1/NOTCH1/BMPR2/TUBB3/PTCH1/GBX2/LAMA2/EMB/EPHA2/FEZ2/NECTIN1/PLXND1/EPHB6/GLI2/SLIT2/PALLD/LHX1/UNC5C/PAX6/NOTCH3/WNT5A/NFIB/NEXN/EFNB2/LAMA5/SEMA3C/PLXNA4/BDNF/SEMA7A/WNT3/MYPN/DLX5/EDN1	57
1108	downregulated.??-T3 vs VC	Downregulated	??-T3 vs VC	BP	GO:0048732	Gland development	83/1437	431/18800	2.82154e-15	7.28598e-13	5.20567e-13	EZH2/CAPN1/ANXA1/PCNA/STAT5B/HIF1A/CPS1/SCRIB/TBX2/SMO/SIX1/GJA1/CADM1/CIT/LRP5/FKBP4/SFRP1/FASN/THRA/TGFB1/MET/GLI3/COX2/TBX3/PLXNA1/ZNF703/SRF/CDKN2B/RARG/HOXA10/SOCS2/MYC/RPS6KA1/PDGFA/DDR1/NOTCH1/IGSF3/PTCH1/LBH/TYMS/PDGFRA/PITX1/HES1/MSX2/EPHA2/HOXB13/HOXA13/SLC29A1/CSF1/TGFB3/CITED2/PLXND1/SOX9/GLI2/EGF/PAX6/SMAD3/FGFR2/PCSK9/TGFBR3/WNT5A/NFIB/APLN/NKX3-1/ARID5B/TGM2/E2F8/LAMA5/SEMA3C/CCND1…	83
1109	downregulated.??-T3 vs VC	Downregulated	??-T3 vs VC	BP	GO:0061448	Connective tissue development	60/1437	260/18800	5.34717e-15	1.32075e-12	9.43647e-13	CD44/EFEMP1/HIF1A/CHST11/COL27A1/LRP5/SNAI1/THRA/TGFB1/RUNX1/GLI3/ADAMTS7/CSGALNACT1/SRF/MBOAT2/RARG/FOXD1/DGAT2/NOTCH1/BMPR2/WNT9A/COL5A1/TYMS/PITX1/TBL1XR1/MSX2/AXIN2/CCN4/HMGA2/HYAL2/RUNX2/CSF1/ADAMTS12/SOX9/FOXC2/RFLNB/PDGFB/SIX2/SMAD3/TGFBI/ACTA2/PDGFRB/WNT5A/NFIB/CCN1/ARID5B/COL1A1/RARB/SERPINB7/SMAD7/WNT7A/WNT5B/SNAI2/ZNF664-RFLNA/WNT7B/FGFR3/ITGB8/CCN2/BMP4/EDN1	60
1110	downregulated.??-T3 vs VC	Downregulated	??-T3 vs VC	BP	GO:0032970	Regulation of actin filament-based process	77/1437	393/18800	1.11792e-14	2.6462e-12	1.89065e-12	TRIOBP/COTL1/DBN1/VASP/ARPC5/LIMCH1/FLNA/CACNA1C/DLC1/SVIL/CARMIL1/ADD2/ROCK2/EFNA5/ASAP3/BAIAP2/EPS8/EVL/PXN/GSN/CIT/SPTAN1/KIRREL1/MYH9/LPAR1/TMSB10/SFRP1/MET/FHOD3/SHANK3/SPTB/ARHGAP28/NF2/FERMT2/ARPIN/WDR1/CCDC88A/PDGFA/TMOD2/PDGFRA/STMN1/CARMIL2/FSCN1/RHOBTB1/RHOBTB3/PLEKHG2/CGNL1/CDC42EP3/TGFB3/CNN2/PHLDB2/ADORA1/SLIT2/DAAM2/FRMD6/RHOB/LIMA1/SMAD3/DIXDC1/S100A10/S1PR1/ACTA2/PDGFRB/NTF3/F2RL…	77
1111	downregulated.??-T3 vs VC	Downregulated	??-T3 vs VC	BP	GO:0034329	Cell junction assembly	80/1437	420/18800	1.70279e-14	3.86942e-12	2.76462e-12	CDH2/OBSL1/PIP5K1C/THSD1/PEAK1/EPHB2/FARP1/LIMCH1/LRFN3/DLC1/MICALL2/ACTN1/CORO1C/ADD2/ROCK2/EFNA5/DST/LAMC1/ITGA6/FLRT2/PDLIM5/SIX1/GJA1/LRP4/AJUBA/PLXNB1/ITGA5/COL16A1/SNAI1/SFRP1/NLGN2/IRX3/CLDN4/SHANK3/PLEC/ZNF703/FERMT2/SRF/CDHR3/GJC1/WDR1/LRRC4B/FZD1/FSCN1/EPHA2/MDGA1/ZDHHC12/NECTIN1/ACTB/LRFN4/AMIGO1/AGRN/PHLDB2/PLXND1/CDH24/VCL/KIRREL3/CNTNAP2/ST8SIA2/SMAD3/AMIGO2/S100A10/WNT5A/CTNND2/EFN…	80
1112	downregulated.??-T3 vs VC	Downregulated	??-T3 vs VC	BP	GO:0030111	Regulation of wnt signaling pathway	68/1437	336/18800	8.14704e-14	1.70611e-11	1.21898e-11	YAP1/TBL1X/SMARCA4/CDH2/LIMD1/HDAC1/SOX13/PTPRU/TLE5/DACT1/TMEM237/WWTR1/DEPDC1B/KREMEN1/LRP4/JRK/SFRP1/TGFB1/CAPRIN2/TMEM64/GLI3/ASPM/CTNNBIP1/ZNF703/TLE3/NOTCH1/TCF7L2/SMURF2/FZD1/TBL1XR1/AXIN2/FZD7/RBMS3/CCN4/TMEM131L/MDFIC/BAMBI/FZD4/APCDD1L/SOX9/TCF7L1/DAAM2/EGF/NXN/SMAD3/RECK/FGFR2/DIXDC1/WNT5A/CTNND2/BICC1/PRICKLE1/KANK1/COL1A1/ALPK2/SALL1/TLE4/CAV1/WNT3/WNT5B/SNAI2/LYPD6/PLPP3/NKD1/LGR5/L…	68
1113	downregulated.??-T3 vs VC	Downregulated	??-T3 vs VC	BP	GO:0048736	Appendage development	46/1437	177/18800	8.40892e-14	1.70611e-11	1.21898e-11	HDAC1/MAP3K20/MBNL1/CACNA1C/CHST11/KAT2B/ITGA6/TBX2/KREMEN1/GJA1/LRP4/LRP5/PLXNA2/GLI3/TBX3/FERMT2/RARG/HOXA10/NOTCH1/BMPR2/PTCH1/PITX1/MSX2/HOXA13/RUNX2/HOXC11/SOX9/RECK/FGFR2/ALX4/KREMEN2/WNT5A/SEMA3C/NR2F2/RARB/SALL1/WNT7A/DLX6/PITX2/WNT3/CYP26B1/TGFB2/SOX4/BMP4/DLX5/KRT84	46
1114	downregulated.??-T3 vs VC	Downregulated	??-T3 vs VC	BP	GO:0060173	Limb development	46/1437	177/18800	8.40892e-14	1.70611e-11	1.21898e-11	HDAC1/MAP3K20/MBNL1/CACNA1C/CHST11/KAT2B/ITGA6/TBX2/KREMEN1/GJA1/LRP4/LRP5/PLXNA2/GLI3/TBX3/FERMT2/RARG/HOXA10/NOTCH1/BMPR2/PTCH1/PITX1/MSX2/HOXA13/RUNX2/HOXC11/SOX9/RECK/FGFR2/ALX4/KREMEN2/WNT5A/SEMA3C/NR2F2/RARB/SALL1/WNT7A/DLX6/PITX2/WNT3/CYP26B1/TGFB2/SOX4/BMP4/DLX5/KRT84	46
1115	downregulated.??-T3 vs VC	Downregulated	??-T3 vs VC	BP	GO:0001649	Osteoblast differentiation	55/1437	241/18800	1.20088e-13	2.35248e-11	1.68079e-11	YAP1/RBMX/LIMD1/CBFB/FBXO5/RRAS2/WWTR1/TPM4/SMO/H3-3A/TCIRG1/GJA1/LRP5/SUFU/MAPK11/SNAI1/SFRP1/FASN/CRIM1/TMEM64/GLI3/FHL2/CTNNBIP1/FERMT2/NOTCH1/BMPR2/PTCH1/FZD1/CDK6/MSX2/AXIN2/EPHA2/CCN4/RUNX2/BAMBI/SOX9/GLI2/TENT5A/PDLIM7/SMAD3/FGFR2/CCN1/COL1A1/FAM20C/VEGFC/SEMA7A/WNT3/SNAI2/CREB3L1/WNT7B/SMAD6/ID3/LGR4/BMP4/DLX5	55
1116	downregulated.??-T3 vs VC	Downregulated	??-T3 vs VC	BP	GO:0031589	Cell-substrate adhesion	71/1437	364/18800	1.55972e-13	2.9536e-11	2.11028e-11	TRIOBP/CD44/NID1/THSD1/PEAK1/COL13A1/AJAP1/LIMCH1/FLNA/DLC1/MICALL2/ACTN1/CORO1C/TYRO3/CARMIL1/ROCK2/EFNA5/CDKN2A/LAMC1/ITGA6/AXL/EMP2/HPSE/NTNG1/PXN/AJUBA/ZYX/EPDR1/ITGA5/COL16A1/SFRP1/ANTXR1/NF2/FERMT2/BCAM/SRF/RIN2/DDR1/NOTCH1/ITGA7/CDK6/FZD7/ACTN4/PLEKHA2/GAS6/ANGPT1/CSF1/NEDD9/ADAMTS12/FZD4/PHLDB2/VCL/CCDC80/PDGFB/SERPINE1/SMAD3/S100A10/COL8A1/CCN1/COL5A3/ACTG1/LAMA5/KANK1/COL1A1/THBS1/PTPRJ…	71
1117	downregulated.??-T3 vs VC	Downregulated	??-T3 vs VC	BP	GO:0048762	Mesenchymal cell differentiation	55/1437	244/18800	2.06804e-13	3.78984e-11	2.70776e-11	EZH2/CDH2/EFNB1/ENG/FLNA/HIF1A/CORO1C/ROCK2/WWTR1/SMO/SEMA3F/SIX1/NRP2/PHLDB1/SEMA4F/SNAI1/SFRP1/TGFB1/TBX3/ZNF703/FERMT2/NOTCH1/TCF7L2/GBX2/HES1/MSX2/AXIN2/HMGA2/TGFB3/CITED2/BAMBI/PHLDB2/SOX9/FOXC2/KITLG/RFLNB/FOXF2/FAM83D/GLIPR2/SIX2/SMAD3/FGFR2/TGFBR3/WNT5A/LAMA5/SEMA3C/COL1A1/SMAD7/SEMA7A/PITX2/NRG1/SNAI2/TGFB2/BMP4/EDN1	55
1118	downregulated.??-T3 vs VC	Downregulated	??-T3 vs VC	BP	GO:0032956	Regulation of actin cytoskeleton organization	69/1437	352/18800	2.69193e-13	4.77901e-11	3.4145e-11	TRIOBP/COTL1/DBN1/VASP/ARPC5/LIMCH1/FLNA/DLC1/SVIL/CARMIL1/ADD2/ROCK2/EFNA5/ASAP3/BAIAP2/EPS8/EVL/PXN/GSN/CIT/SPTAN1/KIRREL1/LPAR1/TMSB10/SFRP1/MET/FHOD3/SHANK3/SPTB/ARHGAP28/NF2/FERMT2/ARPIN/WDR1/CCDC88A/PDGFA/TMOD2/PDGFRA/STMN1/CARMIL2/FSCN1/RHOBTB1/RHOBTB3/PLEKHG2/CGNL1/CDC42EP3/TGFB3/PHLDB2/SLIT2/DAAM2/RHOB/LIMA1/SMAD3/DIXDC1/S100A10/S1PR1/PDGFRB/NTF3/F2RL1/ARHGDIB/SYNPO/ACTG1/KANK1/TPM1/SYNP…	69
1119	downregulated.??-T3 vs VC	Downregulated	??-T3 vs VC	BP	GO:0003007	Heart morphogenesis	56/1437	254/18800	3.32827e-13	5.72967e-11	4.09372e-11	NSD2/YAP1/ENG/FLNA/HIF1A/DLC1/TBX2/FLRT2/SMO/SIX1/GJA1/SUFU/NRP2/SNAI1/TGFB1/TBX3/FHL2/SRF/NOTCH1/BMPR2/PTCH1/COL5A1/FZD1/FZD2/HES1/MSX2/AXIN2/ADGRG6/CITED2/PLXND1/SOX9/FOXC2/SLIT2/SMAD3/FGFR2/TEAD2/S1PR1/TGFBR3/WNT5A/CCN1/ANKRD1/SEMA3C/ALPK2/SMAD7/TPM1/DHRS3/PITX2/NRG1/SNAI2/SYNPO2L/SOX18/SMAD6/TGFB2/SOX4/BMP4/EDN1	56
1120	downregulated.??-T3 vs VC	Downregulated	??-T3 vs VC	BP	GO:0042692	Muscle cell differentiation	73/1437	387/18800	4.05722e-13	6.77913e-11	4.84354e-11	G6PD/NIBAN2/SGCB/EZH2/CDH2/OBSL1/MRTFB/MYL9/ENG/PTGFRN/IL4R/ACTN1/EHD2/CAPN2/HDGFL2/TBX2/SMO/PDLIM5/DMD/H3-3A/SIX1/MAPK12/MYH9/MAPK11/MRTFA/SDC1/IRX3/TGFB1/FHOD3/TBX3/LMNA/FHL2/PLEC/SRF/WDR1/NOTCH1/BMPR2/TMOD2/PDGFRA/PIEZO1/HES1/SPEG/FZD7/SLC8A1/ADM/ACTN4/RBM24/CDK1/MYORG/SOX9/SORBS2/PDGFB/FGFR2/PDGFRB/ANKRD1/EFNB2/ACTG1/RARB/ALPK2/ADAM12/LDB3/BDNF/TPM1/WNT5B/NRG1/CAV2/SYNPO2L/CYP26B1/RGS4/ADAMTS…	73
1121	downregulated.??-T3 vs VC	Downregulated	??-T3 vs VC	BP	GO:0072073	Kidney epithelium development	39/1437	140/18800	5.98682e-13	9.71746e-11	6.94291e-11	YAP1/MYO1E/GREB1L/WWTR1/SMO/SIX1/SDC1/SFRP1/IRX3/GDF11/GLI3/CTNNBIP1/MYC/FOXD1/BASP1/NOTCH1/PTCH1/HES1/PODXL/CD24/SOX9/FOXC2/SLIT2/LHX1/SIX2/SMAD3/FGFR2/EFNB2/LAMA5/RARB/SALL1/SMAD7/KANK2/BMPER/FGF1/WNT7B/SMAD6/LGR4/BMP4	39
1122	downregulated.??-T3 vs VC	Downregulated	??-T3 vs VC	BP	GO:0051216	Cartilage development	47/1437	195/18800	9.03353e-13	1.41145e-10	1.00845e-10	CD44/EFEMP1/HIF1A/CHST11/COL27A1/SNAI1/THRA/TGFB1/RUNX1/GLI3/ADAMTS7/CSGALNACT1/SRF/MBOAT2/RARG/BMPR2/WNT9A/TYMS/PITX1/MSX2/AXIN2/CCN4/HMGA2/HYAL2/RUNX2/ADAMTS12/SOX9/RFLNB/SIX2/SMAD3/TGFBI/WNT5A/NFIB/CCN1/COL1A1/RARB/SMAD7/WNT7A/WNT5B/SNAI2/ZNF664-RFLNA/WNT7B/FGFR3/ITGB8/CCN2/BMP4/EDN1	47
1123	downregulated.??-T3 vs VC	Downregulated	??-T3 vs VC	BP	GO:0022612	Gland morphogenesis	36/1437	123/18800	9.19267e-13	1.41145e-10	1.00845e-10	CAPN1/SCRIB/TBX2/LRP5/SFRP1/TGFB1/GLI3/TBX3/PLXNA1/RARG/RPS6KA1/PDGFA/DDR1/NOTCH1/PTCH1/MSX2/EPHA2/HOXB13/HOXA13/CSF1/TGFB3/PLXND1/SOX9/PAX6/FGFR2/WNT5A/NFIB/NKX3-1/TGM2/LAMA5/SEMA3C/CAV1/SNAI2/FGF1/TGFB2/BMP4	36
1124	downregulated.??-T3 vs VC	Downregulated	??-T3 vs VC	BP	GO:0110053	Regulation of actin filament organization	57/1437	270/18800	1.38786e-12	2.07485e-10	1.48243e-10	TRIOBP/COTL1/DBN1/VASP/ARPC5/LIMCH1/FLNA/DLC1/SVIL/CARMIL1/ADD2/ROCK2/ASAP3/BAIAP2/EPS8/EVL/PXN/GSN/CIT/SPTAN1/KIRREL1/LPAR1/TMSB10/SFRP1/MET/FHOD3/SHANK3/SPTB/ARHGAP28/NF2/FERMT2/ARPIN/WDR1/CCDC88A/TMOD2/STMN1/CARMIL2/PLEKHG2/CGNL1/CDC42EP3/TGFB3/PHLDB2/SLIT2/DAAM2/LIMA1/SMAD3/S100A10/S1PR1/F2RL1/SYNPO/ACTG1/KANK1/TPM1/SYNPO2L/RGS4/CCN2/ID1	57
1125	downregulated.??-T3 vs VC	Downregulated	??-T3 vs VC	BP	GO:0048568	Embryonic organ development	79/1437	449/18800	1.90692e-12	2.77774e-10	1.98463e-10	YAP1/TRIOBP/EPHB2/PLK4/COL13A1/EFEMP1/ENG/TEAD1/HIF1A/CHST11/FBN1/ZFP36L1/SCRIB/MFAP5/TBX2/SMO/SIX1/GJA1/SUFU/NDST1/SNAI1/TGFB1/GLI3/TBX3/POLE/SRF/RARG/PLCD3/PDGFA/NOTCH1/PTCH1/GBX2/PDGFRA/FZD2/HES1/EPHA2/ADM/RUNX2/HOXC11/HS6ST1/TEAD4/TGFB3/CITED2/PDGFC/SOX9/GLI2/FOXC2/PBX3/KITLG/LHX1/FOXF2/INSIG1/PDGFB/LRIG3/SOCS3/SIX2/PAX6/SMAD3/FGFR2/TEAD2/ALX4/WNT5A/CCN1/E2F8/NR2F2/RARB/PLXNA4/SALL1/ALDH1A3/D…	79
1126	downregulated.??-T3 vs VC	Downregulated	??-T3 vs VC	BP	GO:0030900	Forebrain development	70/1437	376/18800	2.37037e-12	3.36652e-10	2.4053e-10	EZH2/CDH2/HDAC1/EPHB2/CNP/NUMBL/PHLPP2/ARPC5/HIF1A/DLC1/ATF5/TYRO3/AXL/BTBD3/SMO/NRP2/NDST1/PGAP1/GLI3/TBX3/SHANK3/ASPM/NF2/SSTR2/SRF/NIN/MYC/IGF1R/NOTCH1/GBX2/CDK6/PITX1/HES1/FAT4/DLX1/H2AX/NEFL/SLC8A1/MDGA1/TOX/NRGN/GLI2/SLIT2/E2F1/LHX1/KIRREL3/CNTNAP2/PAX6/NOTCH3/FGFR2/DIXDC1/ATP2B4/WNT5A/NFIB/NR2F2/RARB/PLXNA4/DCLK2/SALL1/WNT7A/ALDH1A3/SEMA7A/PITX2/OXTR/NRG1/WNT7B/INHBA/DRD1/BMP4/DLX5	70
1127	downregulated.??-T3 vs VC	Downregulated	??-T3 vs VC	BP	GO:0048754	Branching morphogenesis of an epithelial tube	40/1437	153/18800	2.83974e-12	3.93477e-10	2.81131e-10	YAP1/ENG/GREB1L/TBX2/SMO/SIX1/LRP5/MET/GLI3/TBX3/CTNNBIP1/SRF/MYC/FOXD1/DDR1/NOTCH1/PTCH1/GBX2/MSX2/EPHA2/CSF1/PLXND1/SOX9/GLI2/FOXC2/SLIT2/LHX1/EGF/SIX2/FGFR2/WNT5A/NKX3-1/LAMA5/COL4A1/SALL1/FGF1/HHIP/LGR4/BMP4/EDN1	40
1128	downregulated.??-T3 vs VC	Downregulated	??-T3 vs VC	BP	GO:0003205	Cardiac chamber development	42/1437	167/18800	3.28033e-12	4.43703e-10	3.17016e-10	NSD2/ENG/GREB1L/HIF1A/TBX2/SMO/SUFU/NRP2/NDST1/TGFB1/TBX3/FHL2/LUZP1/SRF/IGF1R/NOTCH1/BMPR2/FZD1/FZD2/HES1/MSX2/HOXA13/ADGRG6/CITED2/PLXND1/FOXC2/SLIT2/FGFR2/TGFBR3/WNT5A/CCN1/SEMA3C/SALL1/SMAD7/TPM1/DHRS3/NRG1/PRDM1/SMAD6/TGFB2/SOX4/BMP4	42
1129	downregulated.??-T3 vs VC	Downregulated	??-T3 vs VC	BP	GO:0060537	Muscle tissue development	73/1437	405/18800	4.07537e-12	5.38422e-10	3.84691e-10	G6PD/YAP1/NIBAN2/SGCB/CENPF/OBSL1/TENM4/MRTFB/HMG20B/ENG/SVIL/MYL6/TBX2/SMO/PDLIM5/DMD/SIX1/GJA1/MAPK11/GPC1/IRX3/TGFB1/RUNX1/FHOD3/TBX3/LMNA/FHL2/PLEC/SRF/GJC1/VAX1/NOTCH1/MYLK/PTCH1/ITGA7/PDGFRA/PITX1/MSX2/FZD7/SLC8A1/HIVEP3/RBM24/CITED2/CDK1/MYORG/SOX9/FOXC2/SORBS2/SMAD3/FGFR2/S1PR1/PDGFRB/TGFBR3/WNT5A/ANKRD1/EFNB2/HCN4/SEMA3C/NR2F2/RARB/ALPK2/SMAD7/JPH2/TPM1/CAV1/NRG1/CAV2/CYP26B1/NPPB/RGS4/T…	73
1130	downregulated.??-T3 vs VC	Downregulated	??-T3 vs VC	BP	GO:0003279	Cardiac septum development	32/1437	106/18800	6.70319e-12	8.65474e-10	6.18361e-10	NSD2/ENG/TBX2/SMO/SUFU/NRP2/NDST1/TBX3/LUZP1/NOTCH1/BMPR2/FZD1/FZD2/HES1/MSX2/HOXA13/CITED2/PLXND1/SLIT2/FGFR2/TGFBR3/WNT5A/CCN1/SEMA3C/SALL1/SMAD7/DHRS3/PRDM1/SMAD6/TGFB2/SOX4/BMP4	32
1131	downregulated.??-T3 vs VC	Downregulated	??-T3 vs VC	BP	GO:0001656	Metanephros development	29/1437	89/18800	7.83037e-12	9.88541e-10	7.0629e-10	YAP1/GREB1L/FBN1/WWTR1/SMO/SIX1/IRX3/GDF11/GLI3/MYC/FOXD1/BASP1/PDGFA/PTCH1/PDGFRA/HES1/HOXC11/SOX9/FOXC2/LHX1/PDGFB/SIX2/PDGFRB/NKX3-1/SALL1/WNT7B/ID3/LGR4/BMP4	29
1132	downregulated.??-T3 vs VC	Downregulated	??-T3 vs VC	BP	GO:0060284	Regulation of cell development	83/1437	500/18800	1.2226e-11	1.49195e-09	1.06597e-09	YAP1/TRIOBP/NIBAN2/EZH2/OBSL1/DBN1/TENM4/HDAC1/EPHB2/HMGB2/NUMBL/FLNA/HIF1A/SKIL/FBN1/CORO1C/CARMIL1/ROCK2/EFNA5/BAIAP2/TMEM98/SMO/SEMA3F/TRIB1/LRP4/PLXNA2/SEMA4F/PLXNB1/TGFB1/CAPRIN2/PRTG/GLI3/SHANK3/PLXNA1/ASPM/NF2/FERMT2/PDE5A/SRF/CDKN2B/NIN/MYC/VAX1/NOTCH1/BMPR2/HES1/ZNF365/DLX1/AXIN2/NEFL/ACTN4/CLCF1/NEDD9/AMIGO1/PLXND1/VCL/SLIT2/E2F1/RFLNB/DAAM2/TRIM58/PAX6/RECK/DIXDC1/S100A10/WNT5A/TGM2/SE…	83
1133	downregulated.??-T3 vs VC	Downregulated	??-T3 vs VC	BP	GO:0060828	Regulation of canonical wnt signaling pathway	54/1437	261/18800	1.23432e-11	1.49195e-09	1.06597e-09	YAP1/TBL1X/CDH2/LIMD1/HDAC1/SOX13/PTPRU/TLE5/DACT1/WWTR1/KREMEN1/LRP4/JRK/SFRP1/TGFB1/CAPRIN2/TMEM64/GLI3/ASPM/CTNNBIP1/ZNF703/TLE3/NOTCH1/TCF7L2/SMURF2/FZD1/TBL1XR1/AXIN2/FZD7/RBMS3/TMEM131L/BAMBI/FZD4/SOX9/DAAM2/EGF/SMAD3/RECK/FGFR2/WNT5A/CTNND2/BICC1/PRICKLE1/KANK1/COL1A1/TLE4/CAV1/SNAI2/LYPD6/NKD1/LGR5/LGR4/SOX4/DLX5	54
1134	downregulated.??-T3 vs VC	Downregulated	??-T3 vs VC	BP	GO:0090130	Tissue migration	67/1437	366/18800	1.54384e-11	1.80389e-09	1.28884e-09	SPARC/ANXA1/AKT3/HIF1A/CORO1C/IQSEC1/ROCK2/BCAR1/EMP2/EVL/PXN/TNFSF12/MYH9/NRP2/HMGB1/TGFB1/MET/STARD13/HSPB1/SRF/RIN2/PIK3R3/ANLN/NOTCH1/BMPR2/HBEGF/PKN3/PIK3CD/GLUL/JCAD/EPHA2/ANGPT1/FSTL1/PLXND1/SOX9/FOXC2/SLIT2/TBXA2R/DAAM2/EGF/GLIPR2/PDGFB/RHOB/ACTA2/ATP2B4/WNT5A/EFNB2/RHOJ/KANK1/NR2F2/KANK2/CCBE1/THBS1/WNT7A/BMPER/VEGFC/FGF1/PLPP3/PLK2/SOX18/TGFB2/BMP4/FGFBP1/ID1/CARD10/EDN1/ATOH8	67
1135	downregulated.??-T3 vs VC	Downregulated	??-T3 vs VC	BP	GO:0002064	Epithelial cell development	46/1437	203/18800	1.58566e-11	1.80389e-09	1.28884e-09	YAP1/CDH2/MYO1E/HIF1A/ROCK2/HPSE/SMO/FOSL2/GJA1/TJP2/COL18A1/SDC1/FASN/MET/PLEC/RARG/NOTCH1/TYMS/CDK6/EPHA2/HOXB13/PODXL/HOXA13/FAT1/SOX9/FOXC2/VCL/EZR/PALLD/FRMD6/PDGFB/PAX6/SFN/ACTA2/ARHGEF26/ROS1/WNT5A/F2RL1/SHROOM3/RARB/WNT7A/WNT5B/PRDM1/WNT7B/SOX18/BMP4	46
1136	downregulated.??-T3 vs VC	Downregulated	??-T3 vs VC	BP	GO:0010631	Epithelial cell migration	66/1437	358/18800	1.58765e-11	1.80389e-09	1.28884e-09	SPARC/ANXA1/AKT3/HIF1A/CORO1C/IQSEC1/ROCK2/BCAR1/EMP2/EVL/PXN/TNFSF12/MYH9/NRP2/HMGB1/TGFB1/MET/STARD13/HSPB1/SRF/RIN2/PIK3R3/ANLN/NOTCH1/BMPR2/HBEGF/PKN3/PIK3CD/GLUL/JCAD/EPHA2/ANGPT1/FSTL1/PLXND1/SOX9/FOXC2/SLIT2/TBXA2R/DAAM2/EGF/GLIPR2/PDGFB/RHOB/ATP2B4/WNT5A/EFNB2/RHOJ/KANK1/NR2F2/KANK2/CCBE1/THBS1/WNT7A/BMPER/VEGFC/FGF1/PLPP3/PLK2/SOX18/TGFB2/BMP4/FGFBP1/ID1/CARD10/EDN1/ATOH8	66
1137	downregulated.??-T3 vs VC	Downregulated	??-T3 vs VC	BP	GO:0014706	Striated muscle tissue development	52/1437	248/18800	1.75093e-11	1.9504e-09	1.39352e-09	G6PD/YAP1/SGCB/CENPF/OBSL1/TENM4/MRTFB/ENG/TBX2/PDLIM5/GJA1/MAPK11/IRX3/TGFB1/RUNX1/FHOD3/TBX3/LMNA/FHL2/PLEC/SRF/GJC1/NOTCH1/PDGFRA/MSX2/FZD7/SLC8A1/CITED2/CDK1/FOXC2/SORBS2/SMAD3/FGFR2/S1PR1/PDGFRB/TGFBR3/WNT5A/ANKRD1/EFNB2/HCN4/SEMA3C/RARB/ALPK2/SMAD7/JPH2/TPM1/NRG1/NPPB/RGS4/TGFB2/BMP4/EDN1	52
1138	downregulated.??-T3 vs VC	Downregulated	??-T3 vs VC	BP	GO:0048863	Stem cell differentiation	47/1437	211/18800	1.81026e-11	1.9777e-09	1.41303e-09	YAP1/CDH2/EFNB1/HIF1A/CORO1C/SMO/SEMA3F/SIX1/NRP2/SEMA4F/SFRP1/ZNF281/TRIM6/SRF/PHF19/NOTCH1/LBH/GBX2/FZD1/CDK6/PDGFRA/HES1/MSX2/HMGA2/RUNX2/RBM24/CITED2/ERCC2/SOX9/FOXC2/KITLG/FGFR2/TEAD2/PRICKLE1/LAMA5/SEMA3C/WNT7A/SEMA7A/PITX2/WNT3/NRG1/SNAI2/LIN28A/SOX18/TGFB2/BMP4/EDN1	47
1139	downregulated.??-T3 vs VC	Downregulated	??-T3 vs VC	BP	GO:0002062	Chondrocyte differentiation	32/1437	110/18800	2.00857e-11	2.1331e-09	1.52405e-09	EFEMP1/CHST11/COL27A1/TGFB1/RUNX1/GLI3/ADAMTS7/MBOAT2/RARG/BMPR2/WNT9A/MSX2/AXIN2/CCN4/HMGA2/RUNX2/ADAMTS12/SOX9/RFLNB/SIX2/SMAD3/TGFBI/NFIB/RARB/SMAD7/WNT7A/WNT5B/SNAI2/ZNF664-RFLNA/FGFR3/CCN2/BMP4	32
1140	downregulated.??-T3 vs VC	Downregulated	??-T3 vs VC	BP	GO:0035107	Appendage morphogenesis	37/1437	142/18800	2.06514e-11	2.1331e-09	1.52405e-09	HDAC1/MAP3K20/MBNL1/CACNA1C/CHST11/TBX2/GJA1/LRP4/LRP5/PLXNA2/GLI3/TBX3/RARG/HOXA10/NOTCH1/PTCH1/PITX1/MSX2/HOXA13/RUNX2/HOXC11/SOX9/RECK/FGFR2/ALX4/WNT5A/SEMA3C/RARB/SALL1/WNT7A/DLX6/WNT3/CYP26B1/TGFB2/SOX4/BMP4/DLX5	37
1141	downregulated.??-T3 vs VC	Downregulated	??-T3 vs VC	BP	GO:0035108	Limb morphogenesis	37/1437	142/18800	2.06514e-11	2.1331e-09	1.52405e-09	HDAC1/MAP3K20/MBNL1/CACNA1C/CHST11/TBX2/GJA1/LRP4/LRP5/PLXNA2/GLI3/TBX3/RARG/HOXA10/NOTCH1/PTCH1/PITX1/MSX2/HOXA13/RUNX2/HOXC11/SOX9/RECK/FGFR2/ALX4/WNT5A/SEMA3C/RARB/SALL1/WNT7A/DLX6/WNT3/CYP26B1/TGFB2/SOX4/BMP4/DLX5	37
1142	downregulated.??-T3 vs VC	Downregulated	??-T3 vs VC	BP	GO:0045216	Cell-cell junction organization	46/1437	205/18800	2.27004e-11	2.30287e-09	1.64535e-09	CDH2/PIP5K1C/EPHB2/NUMBL/FLNA/MICALL2/ROCK2/GJA1/KIRREL1/TJP2/SNAI1/NLGN2/IRX3/TGFB1/CLDN4/PLEC/NF2/ZNF703/FERMT2/SRF/CDHR3/GJC1/WDR1/FSCN1/EPHA2/PLEKHA7/NECTIN1/ACTB/TGFB3/CDH24/VCL/CNTNAP2/SMAD3/CTNND2/F2RL1/F2R/EFNB2/ACTG1/CDH18/PKP3/SMAD7/CDH11/CAV1/SNAI2/INAVA/TGFB2	46
1143	downregulated.??-T3 vs VC	Downregulated	??-T3 vs VC	BP	GO:0090132	Epithelium migration	66/1437	361/18800	2.32463e-11	2.31688e-09	1.65536e-09	SPARC/ANXA1/AKT3/HIF1A/CORO1C/IQSEC1/ROCK2/BCAR1/EMP2/EVL/PXN/TNFSF12/MYH9/NRP2/HMGB1/TGFB1/MET/STARD13/HSPB1/SRF/RIN2/PIK3R3/ANLN/NOTCH1/BMPR2/HBEGF/PKN3/PIK3CD/GLUL/JCAD/EPHA2/ANGPT1/FSTL1/PLXND1/SOX9/FOXC2/SLIT2/TBXA2R/DAAM2/EGF/GLIPR2/PDGFB/RHOB/ATP2B4/WNT5A/EFNB2/RHOJ/KANK1/NR2F2/KANK2/CCBE1/THBS1/WNT7A/BMPER/VEGFC/FGF1/PLPP3/PLK2/SOX18/TGFB2/BMP4/FGFBP1/ID1/CARD10/EDN1/ATOH8	66
1144	downregulated.??-T3 vs VC	Downregulated	??-T3 vs VC	BP	GO:0007389	Pattern specification process	78/1437	463/18800	2.45996e-11	2.40948e-09	1.72152e-09	EFNB1/ENG/HIF1A/RTTN/MEIS2/MID1/TBX2/SMO/SEMA3F/SIX1/GJA1/LRP4/LRP5/SUFU/PLXNA2/DOP1B/NRP2/SNAI1/SFRP1/IRX3/GDF11/ETS2/PGAP1/GLI3/TBX3/BCOR/CTNNBIP1/GPR161/HOXC8/SRF/RARG/HOXA10/FOXD1/BASP1/HES4/NOTCH1/BMPR2/DZIP1L/PTCH1/GBX2/HES1/MSX2/DLX1/AXIN2/HOXC11/CITED2/GLI2/FOXC2/PBX3/ODAD2/LHX1/SIM2/DAAM2/SIX2/PAX6/SMAD3/FGFR2/ALX4/WNT5A/NKX3-1/BICC1/SEMA3C/FST/SHROOM3/NR2F2/WNT7A/PITX2/WNT3/FGF1/WNT7B/H…	78
1145	downregulated.??-T3 vs VC	Downregulated	??-T3 vs VC	BP	GO:0060411	Cardiac septum morphogenesis	25/1437	71/18800	3.16033e-11	3.04303e-09	2.17417e-09	NSD2/ENG/TBX2/SMO/NRP2/TBX3/NOTCH1/BMPR2/FZD1/FZD2/HES1/MSX2/CITED2/SLIT2/FGFR2/TGFBR3/WNT5A/CCN1/SEMA3C/SMAD7/DHRS3/SMAD6/TGFB2/SOX4/BMP4	25
1146	downregulated.??-T3 vs VC	Downregulated	??-T3 vs VC	BP	GO:0001657	Ureteric bud development	29/1437	94/18800	3.57595e-11	3.38583e-09	2.4191e-09	GREB1L/SMO/SIX1/SDC1/SFRP1/GDF11/GLI3/CTNNBIP1/MYC/FOXD1/BASP1/PTCH1/HES1/SOX9/FOXC2/SLIT2/LHX1/SIX2/SMAD3/FGFR2/LAMA5/RARB/SALL1/SMAD7/BMPER/FGF1/SMAD6/LGR4/BMP4	29
1147	downregulated.??-T3 vs VC	Downregulated	??-T3 vs VC	BP	GO:0072006	Nephron development	37/1437	145/18800	4.01617e-11	3.70001e-09	2.64357e-09	YAP1/MYO1E/NID1/GREB1L/WWTR1/SMO/SIX1/IRX3/GLI3/CTNNBIP1/PLCE1/MYC/FOXD1/BASP1/NOTCH1/PTCH1/PDGFRA/HES1/PODXL/ANGPT1/CD24/SOX9/FOXC2/LHX1/KIRREL3/PDGFB/SIX2/NOTCH3/ACTA2/PDGFRB/LAMA5/SERPINB7/SALL1/FGF1/WNT7B/LGR4/BMP4	37
1148	downregulated.??-T3 vs VC	Downregulated	??-T3 vs VC	BP	GO:0048608	Reproductive structure development	74/1437	433/18800	4.03803e-11	3.70001e-09	2.64357e-09	ANXA1/PLK4/HMGB2/GREB1L/STAT5B/ETNK2/HIF1A/TYRO3/ZFP36L1/AXL/FANCA/H3-3A/GJA1/DHCR24/FKBP4/NASP/SDC1/SNAI1/SFRP1/GLI3/TBX3/ASPM/RARG/HOXA10/PLCD3/MYC/BASP1/PDGFA/NOTCH1/BMPR2/PTCH1/PDGFRA/HES1/RHOBTB3/ADM/HOXB13/HOXA13/TFAP2C/HS6ST1/CITED2/FZD4/SOX9/SLIT2/KITLG/LHX1/CCNF/GFRA1/FOXF2/PDGFB/SOCS3/MAMLD1/BOK/FGFR2/PDGFRB/WNT5A/NKX3-1/CCN1/ARID5B/BRIP1/E2F8/FST/NR2F2/CCND1/SALL1/WNT7A/PRDM1/WNT7B/LGR…	74
1149	downregulated.??-T3 vs VC	Downregulated	??-T3 vs VC	BP	GO:0072163	Mesonephric epithelium development	29/1437	95/18800	4.77524e-11	4.23877e-09	3.02851e-09	GREB1L/SMO/SIX1/SDC1/SFRP1/GDF11/GLI3/CTNNBIP1/MYC/FOXD1/BASP1/PTCH1/HES1/SOX9/FOXC2/SLIT2/LHX1/SIX2/SMAD3/FGFR2/LAMA5/RARB/SALL1/SMAD7/BMPER/FGF1/SMAD6/LGR4/BMP4	29
1150	downregulated.??-T3 vs VC	Downregulated	??-T3 vs VC	BP	GO:0072164	Mesonephric tubule development	29/1437	95/18800	4.77524e-11	4.23877e-09	3.02851e-09	GREB1L/SMO/SIX1/SDC1/SFRP1/GDF11/GLI3/CTNNBIP1/MYC/FOXD1/BASP1/PTCH1/HES1/SOX9/FOXC2/SLIT2/LHX1/SIX2/SMAD3/FGFR2/LAMA5/RARB/SALL1/SMAD7/BMPER/FGF1/SMAD6/LGR4/BMP4	29
1151	downregulated.??-T3 vs VC	Downregulated	??-T3 vs VC	BP	GO:0061458	Reproductive system development	74/1437	436/18800	5.635e-11	4.92499e-09	3.51879e-09	ANXA1/PLK4/HMGB2/GREB1L/STAT5B/ETNK2/HIF1A/TYRO3/ZFP36L1/AXL/FANCA/H3-3A/GJA1/DHCR24/FKBP4/NASP/SDC1/SNAI1/SFRP1/GLI3/TBX3/ASPM/RARG/HOXA10/PLCD3/MYC/BASP1/PDGFA/NOTCH1/BMPR2/PTCH1/PDGFRA/HES1/RHOBTB3/ADM/HOXB13/HOXA13/TFAP2C/HS6ST1/CITED2/FZD4/SOX9/SLIT2/KITLG/LHX1/CCNF/GFRA1/FOXF2/PDGFB/SOCS3/MAMLD1/BOK/FGFR2/PDGFRB/WNT5A/NKX3-1/CCN1/ARID5B/BRIP1/E2F8/FST/NR2F2/CCND1/SALL1/WNT7A/PRDM1/WNT7B/LGR…	74
1152	downregulated.??-T3 vs VC	Downregulated	??-T3 vs VC	BP	GO:0030879	Mammary gland development	35/1437	135/18800	8.34763e-11	7.18529e-09	5.13373e-09	CAPN1/STAT5B/HIF1A/SCRIB/TBX2/SMO/GJA1/LRP5/FASN/GLI3/COX2/TBX3/ZNF703/SOCS2/DDR1/PTCH1/LBH/MSX2/EPHA2/SLC29A1/CSF1/TGFB3/SOX9/GLI2/EGF/FGFR2/WNT5A/APLN/CCND1/CAV1/OXTR/WNT3/NRG1/WNT7B/BMP4	35
1153	downregulated.??-T3 vs VC	Downregulated	??-T3 vs VC	BP	GO:0003151	Outflow tract morphogenesis	26/1437	80/18800	1.00384e-10	8.51169e-09	6.08141e-09	ENG/HIF1A/TBX2/SIX1/NRP2/TBX3/NOTCH1/BMPR2/FZD1/FZD2/HES1/MSX2/CITED2/PLXND1/FOXC2/FGFR2/TGFBR3/WNT5A/SEMA3C/DHRS3/PITX2/SOX18/SMAD6/TGFB2/BMP4/EDN1	26
1154	downregulated.??-T3 vs VC	Downregulated	??-T3 vs VC	BP	GO:0045667	Regulation of osteoblast differentiation	35/1437	136/18800	1.04259e-10	8.71021e-09	6.22325e-09	YAP1/LIMD1/FBXO5/WWTR1/TCIRG1/LRP5/SUFU/SFRP1/CRIM1/TMEM64/GLI3/CTNNBIP1/FERMT2/NOTCH1/BMPR2/PTCH1/CDK6/MSX2/AXIN2/CCN4/RUNX2/BAMBI/SOX9/TENT5A/PDLIM7/SMAD3/FGFR2/CCN1/FAM20C/VEGFC/SNAI2/WNT7B/SMAD6/ID3/BMP4	35
1155	downregulated.??-T3 vs VC	Downregulated	??-T3 vs VC	BP	GO:0007517	Muscle organ development	61/1437	334/18800	1.394e-10	1.14773e-08	8.20026e-09	NIBAN2/SGCB/CENPF/MRTFB/HMG20B/ENG/SVIL/MYL6/SMO/DMD/SIX1/POU6F1/GJA1/MAPK12/FHL3/GPC1/CRYAB/TGFB1/PLEC/VAX1/BASP1/NOTCH1/SMTN/MYLK/ITGA7/HBEGF/FZD1/LAMA2/PITX1/FZD2/SPEG/TAGLN/HIVEP3/USP2/RBM24/TEAD4/CITED2/DES/MYORG/FHL1/FOXC2/SMAD3/FGFR2/S1PR1/ALX4/TGFBR3/WNT5A/ARID5B/ANKRD1/LAMA5/NR2F2/SMAD7/JPH2/TPM1/CAV1/NRG1/CAV2/CYP26B1/ID3/TGFB2/BMP4	61
1156	downregulated.??-T3 vs VC	Downregulated	??-T3 vs VC	BP	GO:1902903	Regulation of supramolecular fiber organization	66/1437	376/18800	1.44185e-10	1.16213e-08	8.30314e-09	TRIOBP/COTL1/DBN1/VASP/ARPC5/LIMCH1/FLNA/DLC1/SVIL/CKAP2/CARMIL1/ADD2/ROCK2/ASAP3/BAIAP2/MID1/EPS8/PSRC1/EVL/PXN/HSPA8/GSN/CIT/SPTAN1/KIRREL1/FKBP4/LPAR1/TMSB10/CRYAB/SFRP1/MET/FHOD3/SHANK3/SPTB/ARHGAP28/NF2/FERMT2/ARPIN/NIN/WDR1/CCDC88A/TMOD2/STMN1/CARMIL2/PLEKHG2/CGNL1/CDC42EP3/NAV3/TGFB3/PHLDB2/SLIT2/DAAM2/LIMA1/SMAD3/S100A10/S1PR1/F2RL1/SYNPO/ACTG1/KANK1/TPM1/SYNPO2L/RGS4/CCN2/ID1/EDN1	66
1157	downregulated.??-T3 vs VC	Downregulated	??-T3 vs VC	BP	GO:0001823	Mesonephros development	29/1437	99/18800	1.4524e-10	1.16213e-08	8.30314e-09	GREB1L/SMO/SIX1/SDC1/SFRP1/GDF11/GLI3/CTNNBIP1/MYC/FOXD1/BASP1/PTCH1/HES1/SOX9/FOXC2/SLIT2/LHX1/SIX2/SMAD3/FGFR2/LAMA5/RARB/SALL1/SMAD7/BMPER/FGF1/SMAD6/LGR4/BMP4	29
1158	downregulated.??-T3 vs VC	Downregulated	??-T3 vs VC	BP	GO:0030278	Regulation of ossification	32/1437	118/18800	1.51813e-10	1.19785e-08	8.55837e-09	HIF1A/KREMEN1/GJA1/SRGN/LRP4/SFRP1/TGFB1/BCOR/NOTCH1/BMPR2/SLC8A1/RUNX2/CSF1/PHOSPHO1/TGFB3/SOX9/RFLNB/TENT5A/SIX2/SMAD3/S1PR1/KREMEN2/WNT5A/CCN1/FAM20C/SMAD7/DHRS3/ZNF664-RFLNA/ADRB2/SMAD6/TGFB2/BMP4	32
1159	downregulated.??-T3 vs VC	Downregulated	??-T3 vs VC	BP	GO:0043542	Endothelial cell migration	54/1437	279/18800	1.75056e-10	1.36232e-08	9.73349e-09	SPARC/ANXA1/AKT3/HIF1A/ROCK2/BCAR1/EMP2/PXN/TNFSF12/MYH9/NRP2/HMGB1/TGFB1/MET/STARD13/HSPB1/SRF/RIN2/PIK3R3/NOTCH1/BMPR2/PIK3CD/GLUL/JCAD/EPHA2/ANGPT1/FSTL1/PLXND1/FOXC2/SLIT2/TBXA2R/EGF/PDGFB/RHOB/ATP2B4/WNT5A/EFNB2/RHOJ/NR2F2/CCBE1/THBS1/WNT7A/BMPER/VEGFC/FGF1/PLPP3/PLK2/SOX18/BMP4/FGFBP1/ID1/CARD10/EDN1/ATOH8	54
1160	downregulated.??-T3 vs VC	Downregulated	??-T3 vs VC	BP	GO:0060348	Bone development	47/1437	225/18800	1.87259e-10	1.43759e-08	1.02713e-08	NSD2/COL13A1/ENG/FBN1/COL27A1/GJA1/ANXA2/LRP5/MAPK11/PLXNB1/FLI1/GLI3/ADAMTS7/CSGALNACT1/SRF/RARG/XYLT1/TRIM45/BMPR2/FOXN3/MSX2/AXIN2/BNC2/CCN4/RUNX2/EBP/PHOSPHO1/ADAMTS12/TGFB3/CITED2/PDGFC/SOX9/RFLNB/INSIG1/FGFR2/LRRC17/TGM2/COL1A1/RARB/FAM20C/DHRS3/PITX2/ZNF664-RFLNA/CYP26B1/FGFR3/BMP4/DLX5	47
1161	downregulated.??-T3 vs VC	Downregulated	??-T3 vs VC	BP	GO:0030326	Embryonic limb morphogenesis	32/1437	119/18800	1.92627e-10	1.43989e-08	1.02877e-08	HDAC1/MAP3K20/MBNL1/CACNA1C/CHST11/TBX2/GJA1/LRP4/LRP5/GLI3/TBX3/RARG/HOXA10/NOTCH1/PTCH1/PITX1/MSX2/HOXA13/RUNX2/HOXC11/RECK/ALX4/WNT5A/RARB/SALL1/WNT7A/DLX6/WNT3/CYP26B1/TGFB2/BMP4/DLX5	32
1162	downregulated.??-T3 vs VC	Downregulated	??-T3 vs VC	BP	GO:0035113	Embryonic appendage morphogenesis	32/1437	119/18800	1.92627e-10	1.43989e-08	1.02877e-08	HDAC1/MAP3K20/MBNL1/CACNA1C/CHST11/TBX2/GJA1/LRP4/LRP5/GLI3/TBX3/RARG/HOXA10/NOTCH1/PTCH1/PITX1/MSX2/HOXA13/RUNX2/HOXC11/RECK/ALX4/WNT5A/RARB/SALL1/WNT7A/DLX6/WNT3/CYP26B1/TGFB2/BMP4/DLX5	32
1163	downregulated.??-T3 vs VC	Downregulated	??-T3 vs VC	BP	GO:0003206	Cardiac chamber morphogenesis	33/1437	126/18800	2.15134e-10	1.58724e-08	1.13405e-08	NSD2/ENG/HIF1A/TBX2/SMO/NRP2/TGFB1/TBX3/FHL2/SRF/NOTCH1/BMPR2/FZD1/FZD2/HES1/MSX2/ADGRG6/CITED2/FOXC2/SLIT2/FGFR2/TGFBR3/WNT5A/CCN1/SEMA3C/SMAD7/TPM1/DHRS3/NRG1/SMAD6/TGFB2/SOX4/BMP4	33
1164	downregulated.??-T3 vs VC	Downregulated	??-T3 vs VC	BP	GO:0051146	Striated muscle cell differentiation	54/1437	281/18800	2.30873e-10	1.62718e-08	1.16258e-08	G6PD/NIBAN2/SGCB/EZH2/CDH2/OBSL1/MYL9/PTGFRN/IL4R/EHD2/CAPN2/SMO/PDLIM5/SIX1/MYH9/SDC1/IRX3/TGFB1/FHOD3/TBX3/LMNA/FHL2/PLEC/SRF/WDR1/NOTCH1/TMOD2/PDGFRA/PIEZO1/FZD7/SLC8A1/RBM24/CDK1/MYORG/SORBS2/PDGFRB/ANKRD1/EFNB2/ACTG1/RARB/ALPK2/ADAM12/LDB3/BDNF/TPM1/NRG1/CAV2/SYNPO2L/CYP26B1/RGS4/ADAMTS15/MYPN/BMP4/EDN1	54
1165	downregulated.??-T3 vs VC	Downregulated	??-T3 vs VC	BP	GO:0048738	Cardiac muscle tissue development	48/1437	234/18800	2.3171e-10	1.62718e-08	1.16258e-08	G6PD/YAP1/SGCB/OBSL1/TENM4/ENG/TBX2/PDLIM5/GJA1/MAPK11/IRX3/TGFB1/RUNX1/FHOD3/TBX3/LMNA/FHL2/PLEC/SRF/GJC1/NOTCH1/PDGFRA/MSX2/FZD7/SLC8A1/CITED2/CDK1/FOXC2/SORBS2/FGFR2/S1PR1/PDGFRB/TGFBR3/WNT5A/ANKRD1/EFNB2/HCN4/RARB/ALPK2/SMAD7/JPH2/TPM1/NRG1/NPPB/RGS4/TGFB2/BMP4/EDN1	48
1166	downregulated.??-T3 vs VC	Downregulated	??-T3 vs VC	BP	GO:0030038	Contractile actin filament bundle assembly	30/1437	107/18800	2.32004e-10	1.62718e-08	1.16258e-08	LIMCH1/DLC1/CARMIL1/ROCK2/ASAP3/EVL/PXN/ZYX/LPAR1/SFRP1/MET/PDLIM1/ARHGAP28/NF2/FERMT2/SRF/CCDC88A/STMN1/FHDC1/CGNL1/TGFB3/PHLDB2/FAM171A1/SMAD3/S100A10/S1PR1/ACTG1/TPM1/SYNPO2L/CCN2	30
1167	downregulated.??-T3 vs VC	Downregulated	??-T3 vs VC	BP	GO:0043149	Stress fiber assembly	30/1437	107/18800	2.32004e-10	1.62718e-08	1.16258e-08	LIMCH1/DLC1/CARMIL1/ROCK2/ASAP3/EVL/PXN/ZYX/LPAR1/SFRP1/MET/PDLIM1/ARHGAP28/NF2/FERMT2/SRF/CCDC88A/STMN1/FHDC1/CGNL1/TGFB3/PHLDB2/FAM171A1/SMAD3/S100A10/S1PR1/ACTG1/TPM1/SYNPO2L/CCN2	30
1168	downregulated.??-T3 vs VC	Downregulated	??-T3 vs VC	BP	GO:0055001	Muscle cell development	41/1437	183/18800	2.89493e-10	2.00221e-08	1.43053e-08	G6PD/NIBAN2/SGCB/OBSL1/MYL9/ENG/ACTN1/SMO/PDLIM5/DMD/SIX1/SDC1/FHOD3/TBX3/LMNA/FHL2/PLEC/SRF/WDR1/NOTCH1/TMOD2/PDGFRA/HES1/SLC8A1/ADM/ACTN4/CDK1/MYORG/SORBS2/PDGFRB/ANKRD1/ACTG1/ALPK2/LDB3/TPM1/CAV2/SYNPO2L/RGS4/MYPN/BMP4/EDN1	41
1169	downregulated.??-T3 vs VC	Downregulated	??-T3 vs VC	BP	GO:0030198	Extracellular matrix organization	57/1437	307/18800	2.92524e-10	2.00221e-08	1.43053e-08	COL12A1/MYO1E/NID1/COL13A1/ENG/GFOD2/COL27A1/LAMC1/FLRT2/NTNG1/HMCN1/MMP17/LOXL4/COL18A1/PHLDB1/COL16A1/TGFB1/RUNX1/ADAMTS7/ANTXR1/CSGALNACT1/COL4A2/FURIN/DDR1/NOTCH1/COL5A1/ZNF469/PDGFRA/CARMIL2/FSCN1/GAS6/ADAMTS12/COL4A5/ERCC2/PHLDB2/SOX9/FOXC2/CCDC80/FOXF2/SMAD3/RECK/TGFBI/COL8A1/BCL3/CCN1/COL5A3/COL1A1/CRISPLD2/COL4A1/CAV1/OLFML2B/CAV2/CREB3L1/ADAMTS15/TGFB2/TNFRSF11B/CCN2	57
1170	downregulated.??-T3 vs VC	Downregulated	??-T3 vs VC	BP	GO:0042063	Gliogenesis	55/1437	291/18800	3.01522e-10	2.03922e-08	1.45698e-08	EZH2/CDH2/ROR1/TENM4/HDAC1/MXRA8/ANXA1/SOX13/CNP/TLR4/NDN/ERBB2/SCRIB/TMEM98/SMO/SLC45A3/MYRF/GPC1/SH3TC2/TGFB1/GLI3/PLEC/NF2/CDKN2B/ABCA2/MYC/WDR1/NOTCH1/CSPG4/PLP1/CDK6/HES1/ZNF365/DLX1/CDKN2C/CLCF1/ADGRG6/CSF1/ERCC2/CDK1/SOX9/E2F1/DAAM2/PAX6/BOK/FGF5/NFIB/TRPC4/NRG1/LIN28A/TSPAN2/TGFB2/SOX4/ZNF488/DRD1	55
1171	downregulated.??-T3 vs VC	Downregulated	??-T3 vs VC	BP	GO:0032330	Regulation of chondrocyte differentiation	20/1437	51/18800	3.16486e-10	2.11525e-08	1.5113e-08	EFEMP1/GLI3/ADAMTS7/MBOAT2/RARG/WNT9A/AXIN2/CCN4/RUNX2/ADAMTS12/SOX9/RFLNB/SIX2/SMAD3/RARB/SMAD7/SNAI2/ZNF664-RFLNA/CCN2/BMP4	20
1172	downregulated.??-T3 vs VC	Downregulated	??-T3 vs VC	BP	GO:0043062	Extracellular structure organization	57/1437	308/18800	3.32866e-10	2.19885e-08	1.57103e-08	COL12A1/MYO1E/NID1/COL13A1/ENG/GFOD2/COL27A1/LAMC1/FLRT2/NTNG1/HMCN1/MMP17/LOXL4/COL18A1/PHLDB1/COL16A1/TGFB1/RUNX1/ADAMTS7/ANTXR1/CSGALNACT1/COL4A2/FURIN/DDR1/NOTCH1/COL5A1/ZNF469/PDGFRA/CARMIL2/FSCN1/GAS6/ADAMTS12/COL4A5/ERCC2/PHLDB2/SOX9/FOXC2/CCDC80/FOXF2/SMAD3/RECK/TGFBI/COL8A1/BCL3/CCN1/COL5A3/COL1A1/CRISPLD2/COL4A1/CAV1/OLFML2B/CAV2/CREB3L1/ADAMTS15/TGFB2/TNFRSF11B/CCN2	57
1173	downregulated.??-T3 vs VC	Downregulated	??-T3 vs VC	BP	GO:0045229	External encapsulating structure organization	57/1437	310/18800	4.30059e-10	2.80824e-08	2.00642e-08	COL12A1/MYO1E/NID1/COL13A1/ENG/GFOD2/COL27A1/LAMC1/FLRT2/NTNG1/HMCN1/MMP17/LOXL4/COL18A1/PHLDB1/COL16A1/TGFB1/RUNX1/ADAMTS7/ANTXR1/CSGALNACT1/COL4A2/FURIN/DDR1/NOTCH1/COL5A1/ZNF469/PDGFRA/CARMIL2/FSCN1/GAS6/ADAMTS12/COL4A5/ERCC2/PHLDB2/SOX9/FOXC2/CCDC80/FOXF2/SMAD3/RECK/TGFBI/COL8A1/BCL3/CCN1/COL5A3/COL1A1/CRISPLD2/COL4A1/CAV1/OLFML2B/CAV2/CREB3L1/ADAMTS15/TGFB2/TNFRSF11B/CCN2	57
1174	downregulated.??-T3 vs VC	Downregulated	??-T3 vs VC	BP	GO:0060021	Roof of mouth development	27/1437	91/18800	4.52365e-10	2.92032e-08	2.08651e-08	EPHB2/TBX2/SNAI1/GDF11/GLI3/TBX3/BCOR/VAX1/FZD1/PDGFRA/FZD2/BNC2/TGFB3/FOXF2/INSIG1/ALX4/TGFBR3/WNT5A/ARID5B/WNT7A/DLX6/DHRS3/SNAI2/TGFB2/ITGB8/INHBA/DLX5	27
1175	downregulated.??-T3 vs VC	Downregulated	??-T3 vs VC	BP	GO:1901888	Regulation of cell junction assembly	43/1437	201/18800	5.04755e-10	3.22192e-08	2.30199e-08	PEAK1/EPHB2/FARP1/LIMCH1/LRFN3/DLC1/CORO1C/ROCK2/EFNA5/FLRT2/PDLIM5/SIX1/COL16A1/SNAI1/SFRP1/NLGN2/IRX3/FERMT2/LRRC4B/FZD1/EPHA2/MDGA1/NECTIN1/LRFN4/AMIGO1/AGRN/PHLDB2/VCL/CNTNAP2/ST8SIA2/SMAD3/AMIGO2/S100A10/WNT5A/ACTG1/THBS1/WNT7A/BDNF/CAV1/OXTR/SNAI2/PTPRJ/CBLN1	43
1176	downregulated.??-T3 vs VC	Downregulated	??-T3 vs VC	BP	GO:0042476	Odontogenesis	33/1437	130/18800	5.22201e-10	3.29625e-08	2.3551e-08	HDAC1/SMO/TCIRG1/LRP4/SDC1/GLI3/BCOR/NF2/PDGFRA/MSX2/DLX1/AXIN2/ADM/ROGDI/RUNX2/NECTIN1/CSF1/TGFB3/GLI2/SERPINE1/FGFR2/LAMA5/FST/COL1A1/FAM20C/PITX2/ID3/TGFB2/TNFRSF11B/ODAPH/INHBA/BMP4/EDN1	33
1177	downregulated.??-T3 vs VC	Downregulated	??-T3 vs VC	BP	GO:0051960	Regulation of nervous system development	72/1437	440/18800	5.5363e-10	3.45623e-08	2.4694e-08	YAP1/EZH2/OBSL1/DBN1/TENM4/HDAC1/EPHB2/HMGB2/LPIN1/NUMBL/HIF1A/SKIL/EFNA5/BAIAP2/TMEM98/FLRT2/SMO/SEMA3F/LRP4/MYRF/PLXNA2/SEMA4F/PLXNB1/NLGN2/TGFB1/CAPRIN2/PRTG/GLI3/SHANK3/PLXNA1/ASPM/NF2/SRF/CDKN2B/RARG/NIN/MYC/VAX1/LRRC4B/NOTCH1/BMPR2/GBX2/HES1/ZNF365/DLX1/NEFL/CLCF1/AMIGO1/AGRN/PLXND1/SLIT2/E2F1/DAAM2/ST8SIA2/PAX6/DIXDC1/AMIGO2/WNT5A/TGM2/SEMA3C/TIAM2/PLXNA4/WNT7A/BDNF/VEGFC/SEMA7A/OXTR/WNT3/…	72
1178	downregulated.??-T3 vs VC	Downregulated	??-T3 vs VC	BP	GO:0010595	Positive regulation of endothelial cell migration	33/1437	131/18800	6.47526e-10	3.99847e-08	2.85682e-08	SPARC/ANXA1/AKT3/HIF1A/ROCK2/BCAR1/NRP2/HMGB1/TGFB1/MET/HSPB1/RIN2/BMPR2/PIK3CD/JCAD/ANGPT1/FOXC2/EGF/PDGFB/RHOB/WNT5A/RHOJ/CCBE1/THBS1/WNT7A/VEGFC/FGF1/PLPP3/PLK2/BMP4/FGFBP1/EDN1/ATOH8	33
1179	downregulated.??-T3 vs VC	Downregulated	??-T3 vs VC	BP	GO:0032231	Regulation of actin filament bundle assembly	29/1437	106/18800	8.709e-10	5.26338e-08	3.76057e-08	LIMCH1/FLNA/DLC1/CARMIL1/ROCK2/ASAP3/EVL/PXN/LPAR1/SFRP1/MET/SHANK3/ARHGAP28/NF2/FERMT2/CCDC88A/STMN1/CGNL1/TGFB3/PHLDB2/SMAD3/S100A10/S1PR1/SYNPO/ACTG1/TPM1/SYNPO2L/CCN2/ID1	29
1180	downregulated.??-T3 vs VC	Downregulated	??-T3 vs VC	BP	GO:0060840	Artery development	29/1437	106/18800	8.709e-10	5.26338e-08	3.76057e-08	ENG/AKT3/TBX2/SIX1/SUFU/NDST1/GLI3/LUZP1/SRF/NOTCH1/BMPR2/MYLK/HES1/HOXA13/CITED2/PLXND1/FOXC2/NOTCH3/PDGFRB/NKX3-1/PRICKLE1/EFNB2/SMAD7/PRDM1/SMAD6/TGFB2/SOX4/BMP4/EDN1	29
1181	downregulated.??-T3 vs VC	Downregulated	??-T3 vs VC	BP	GO:0061035	Regulation of cartilage development	23/1437	70/18800	9.39163e-10	5.61619e-08	4.01265e-08	EFEMP1/GLI3/ADAMTS7/MBOAT2/RARG/BMPR2/WNT9A/AXIN2/CCN4/RUNX2/ADAMTS12/SOX9/RFLNB/SIX2/SMAD3/WNT5A/CCN1/RARB/SMAD7/SNAI2/ZNF664-RFLNA/CCN2/BMP4	23
1182	downregulated.??-T3 vs VC	Downregulated	??-T3 vs VC	BP	GO:0045785	Positive regulation of cell adhesion	72/1437	446/18800	1.01925e-09	5.97766e-08	4.27091e-08	TRIOBP/CD44/NID1/EFNB1/ANXA1/SOX13/MYO10/CBFB/PTPRU/MAGI1/CD276/SOCS5/FRMD5/FLNA/STAT5B/FLOT2/IL4R/CARMIL1/CYTH3/ERBB2/EMP2/ITPKB/ITGA5/COL16A1/SFRP1/HMGB1/RUNX1/GLI3/IL27RA/PDCD1LG2/TNFSF9/FERMT2/MALT1/RIN2/VSIR/CDK6/PIEZO1/HES1/PODXL/PLEKHA2/ANGPT1/CSF1/NEDD9/CITED2/ST3GAL4/CD24/GLI2/FOXC2/CCDC80/NLRP3/PDGFB/CD70/SIRPB1/SMAD3/SIRPA/S100A10/COL8A1/WNT5A/CCN1/EFNB2/TGM2/SMAD7/TPM1/CAV1/PTPRJ/PLPP…	72
1183	downregulated.??-T3 vs VC	Downregulated	??-T3 vs VC	BP	GO:0021915	Neural tube development	36/1437	154/18800	1.02065e-09	5.97766e-08	4.27091e-08	ITPK1/VASP/HIF1A/DLC1/ZFP36L1/DACT1/SCRIB/SMO/SUFU/PLXNA2/SFRP1/TGFB1/GLI3/GPR161/LUZP1/RARG/NOTCH1/DZIP1L/PTCH1/GBX2/FZD1/FZD2/HES1/EPHA2/ADM/CITED2/GLI2/PAX6/TEAD2/WNT5A/PRICKLE1/SEMA3C/SHROOM3/TGFB2/SOX4/BMP4	36
1184	downregulated.??-T3 vs VC	Downregulated	??-T3 vs VC	BP	GO:0051962	Positive regulation of nervous system development	51/1437	270/18800	1.36068e-09	7.88776e-08	5.63563e-08	OBSL1/DBN1/TENM4/HDAC1/EPHB2/NUMBL/HIF1A/SKIL/EFNA5/BAIAP2/FLRT2/SMO/PLXNA2/PLXNB1/NLGN2/TGFB1/CAPRIN2/GLI3/SHANK3/PLXNA1/ASPM/SRF/NIN/MYC/LRRC4B/NOTCH1/BMPR2/HES1/ZNF365/NEFL/CLCF1/AMIGO1/AGRN/PLXND1/SLIT2/E2F1/ST8SIA2/PAX6/DIXDC1/AMIGO2/TGM2/TIAM2/PLXNA4/WNT7A/BDNF/VEGFC/SEMA7A/OXTR/WNT3/CBLN1/ZNF488	51
1185	downregulated.??-T3 vs VC	Downregulated	??-T3 vs VC	BP	GO:0003002	Regionalization	61/1437	354/18800	1.52109e-09	8.72862e-08	6.2364e-08	SMO/SEMA3F/SIX1/LRP4/LRP5/SUFU/PLXNA2/NRP2/SNAI1/SFRP1/IRX3/GDF11/ETS2/PGAP1/GLI3/TBX3/CTNNBIP1/GPR161/HOXC8/SRF/RARG/HOXA10/FOXD1/BASP1/HES4/NOTCH1/BMPR2/DZIP1L/PTCH1/GBX2/HES1/MSX2/DLX1/AXIN2/HOXC11/CITED2/GLI2/FOXC2/PBX3/LHX1/SIX2/PAX6/SMAD3/FGFR2/ALX4/WNT5A/NKX3-1/SEMA3C/NR2F2/WNT7A/PITX2/WNT3/FGF1/WNT7B/HHIP/CYP26B1/SMAD6/LFNG/BMP4/NTF4/EDN1	61
1186	downregulated.??-T3 vs VC	Downregulated	??-T3 vs VC	BP	GO:0043588	Skin development	54/1437	296/18800	1.65841e-09	9.42145e-08	6.73142e-08	YAP1/ELOVL1/HDAC1/ANXA1/ZFP36L1/ROCK2/ITGA6/HPSE/SMO/FOSL2/FLG/LRP4/KRT8/SUFU/DHCR24/SNAI1/MET/CLDN4/PLEC/KAZN/SRF/PDGFA/NOTCH1/COL5A1/STMN1/MSX2/EPHA2/KRT81/KRT83/KRT86/ERCC2/SOX9/GLI2/PALLD/PAX6/FGFR2/SFN/ALX4/KRT85/WNT5A/COL5A3/LAMA5/FST/COL1A1/CDH11/TNFRSF19/CYP26B1/SOX18/KRT80/LGR5/LGR4/TGFB2/INHBA/KRT84	54
1187	downregulated.??-T3 vs VC	Downregulated	??-T3 vs VC	BP	GO:0090287	Regulation of cellular response to growth factor stimulus	56/1437	314/18800	1.97105e-09	1.10867e-07	7.92116e-08	NIBAN2/ENG/HIF1A/CHST11/SKIL/FBN1/NEO1/GPC1/ITGA5/SFRP1/TGFB1/C20orf27/CRIM1/ZNF703/CDKN2B/PMEPA1/FOXD1/NOTCH1/BMPR2/SMURF2/FZD1/HES1/MSX2/JCAD/DLX1/HOXA13/RUNX2/ADAMTS12/TGFB3/CITED2/BAMBI/FZD4/FSTL1/SLIT2/SMAD3/TGFBR3/ATP2B4/WNT5A/APLN/CCN1/FST/FAM20C/SMAD7/CCBE1/THBS1/BMPER/VEGFC/CAV1/CAV2/FGF1/CREB3L1/NREP/HHIP/SMAD6/BMP4/FGFBP1	56
1188	downregulated.??-T3 vs VC	Downregulated	??-T3 vs VC	BP	GO:0010001	Glial cell differentiation	44/1437	218/18800	2.20045e-09	1.22557e-07	8.75639e-08	CDH2/ROR1/TENM4/HDAC1/MXRA8/SOX13/CNP/TLR4/ERBB2/TMEM98/SMO/SLC45A3/MYRF/GPC1/SH3TC2/TGFB1/GLI3/PLEC/ABCA2/WDR1/NOTCH1/PLP1/CDK6/HES1/ZNF365/DLX1/CDKN2C/CLCF1/ADGRG6/ERCC2/CDK1/SOX9/DAAM2/PAX6/BOK/FGF5/NFIB/TRPC4/NRG1/LIN28A/TSPAN2/SOX4/ZNF488/DRD1	44
1189	downregulated.??-T3 vs VC	Downregulated	??-T3 vs VC	BP	GO:0003281	Ventricular septum development	23/1437	73/18800	2.38326e-09	1.3145e-07	9.39178e-08	NSD2/SUFU/TBX3/LUZP1/NOTCH1/BMPR2/FZD1/FZD2/HES1/HOXA13/CITED2/SLIT2/FGFR2/TGFBR3/WNT5A/CCN1/SALL1/SMAD7/PRDM1/SMAD6/TGFB2/SOX4/BMP4	23
1190	downregulated.??-T3 vs VC	Downregulated	??-T3 vs VC	BP	GO:0010634	Positive regulation of epithelial cell migration	38/1437	174/18800	2.76414e-09	1.50991e-07	1.0788e-07	SPARC/ANXA1/AKT3/HIF1A/IQSEC1/ROCK2/BCAR1/NRP2/HMGB1/TGFB1/MET/HSPB1/RIN2/BMPR2/HBEGF/PIK3CD/JCAD/ANGPT1/SOX9/FOXC2/EGF/GLIPR2/PDGFB/RHOB/WNT5A/RHOJ/CCBE1/THBS1/WNT7A/VEGFC/FGF1/PLPP3/PLK2/TGFB2/BMP4/FGFBP1/EDN1/ATOH8	38
1191	downregulated.??-T3 vs VC	Downregulated	??-T3 vs VC	BP	GO:0048705	Skeletal system morphogenesis	45/1437	228/18800	3.03704e-09	1.64319e-07	1.17402e-07	COL13A1/CHST11/PPARGC1B/COL27A1/SIX1/LRP5/NDST1/SFRP1/THRA/GLI3/CSGALNACT1/HOXC8/RARG/BMPR2/FOXN3/PDGFRA/MSX2/AXIN2/HYAL2/RUNX2/HOXC11/PHOSPHO1/TGFB3/CITED2/SOX9/FOXC2/LHX1/RFLNB/INSIG1/SIX2/SMAD3/FGFR2/ALX4/ARID5B/COL1A1/RARB/WNT7A/DHRS3/ZNF664-RFLNA/HHIP/CYP26B1/FGFR3/CCN2/BMP4/DLX5	45
1192	downregulated.??-T3 vs VC	Downregulated	??-T3 vs VC	BP	GO:0035051	Cardiocyte differentiation	35/1437	153/18800	3.20405e-09	1.71056e-07	1.22216e-07	G6PD/SGCB/OBSL1/TENM4/PDLIM5/IRX3/TGFB1/FHOD3/TBX3/LMNA/FHL2/PLEC/SRF/NOTCH1/PDGFRA/HES1/FZD7/SLC8A1/CITED2/CDK1/SORBS2/PDGFRB/TGFBR3/PRICKLE1/EFNB2/SEMA3C/RARB/ALPK2/PITX2/NRG1/RGS4/SOX18/TGFB2/BMP4/EDN1	35
1193	downregulated.??-T3 vs VC	Downregulated	??-T3 vs VC	BP	GO:0044089	Positive regulation of cellular component biogenesis	76/1437	494/18800	3.22179e-09	1.71056e-07	1.22216e-07	ACTR3/SPAG5/VASP/EPHB2/PLK4/RALB/LIMCH1/FNBP1L/MAPK9/TLR4/ASAP1/PIP4K2B/CARMIL1/ROCK2/EFNA5/BAIAP2/EPS8/PSRC1/FLRT2/ABCA1/EVL/PXN/KIRREL1/AJUBA/PHLDB1/SLX4/LPAR1/SDC1/COL16A1/SFRP1/NLGN2/IRX3/TGFB1/MET/NF2/FERMT2/SRF/NIN/PLCE1/ANLN/CCDC88A/LRRC4B/CARMIL2/PIEZO1/FSCN1/EPHA2/AUTS2/EPS8L2/CDC42EP3/NAV3/TGFB3/AMIGO1/AGRN/PHLDB2/SOX9/CNTNAP2/ST8SIA2/PALM/SMAD3/AMIGO2/S100A10/TENM2/F2RL1/SYNPO/CDK2/WNT…	76
1194	downregulated.??-T3 vs VC	Downregulated	??-T3 vs VC	BP	GO:0001570	Vasculogenesis	24/1437	80/18800	3.25598e-09	1.7127e-07	1.22369e-07	YAP1/MYO1E/ENG/ZFP36L1/EMP2/SMO/TGFB1/RIN2/GJC1/NOTCH1/EPHA2/ADM/HOXA13/CITED2/FZD4/TEAD2/PDGFRB/TGFBR3/WNT7A/CAV1/ACKR3/WNT7B/SOX18/ITGB8	24
1195	downregulated.??-T3 vs VC	Downregulated	??-T3 vs VC	BP	GO:0001654	Eye development	63/1437	379/18800	3.56108e-09	1.85601e-07	1.32608e-07	SMARCA4/OBSL1/TENM3/HDAC1/EPHB2/EFEMP1/CACNA1C/HIF1A/SKIL/NECTIN3/FBN1/MEIS2/MFAP5/TBX2/TGIF2/TCIRG1/GJA1/LRP5/CRYAB/GDF11/GLI3/LIMK2/NF2/SRF/RARG/VAX1/BMPR2/SHROOM2/WNT9A/COL5A1/BCAR3/PDGFRA/DLX1/EPHA2/MITF/NECTIN1/FAT1/CITED2/FZD4/SOX9/FOXC2/PBX3/LHX1/FOXF2/PAX6/SMAD3/COL8A1/PDGFRB/ATP2B4/WNT5A/RHOJ/RARB/COL4A1/WNT7A/ALDH1A3/PITX2/WNT5B/PRDM1/WNT7B/TGFB2/CRYBA2/INHBA/BMP4	63
1196	downregulated.??-T3 vs VC	Downregulated	??-T3 vs VC	BP	GO:0003231	Cardiac ventricle development	31/1437	126/18800	3.93536e-09	2.03244e-07	1.45213e-07	NSD2/ENG/GREB1L/HIF1A/SUFU/TGFB1/TBX3/LUZP1/NOTCH1/BMPR2/FZD1/FZD2/HES1/HOXA13/CITED2/FOXC2/SLIT2/FGFR2/TGFBR3/WNT5A/CCN1/SEMA3C/SALL1/SMAD7/TPM1/NRG1/PRDM1/SMAD6/TGFB2/SOX4/BMP4	31
1197	downregulated.??-T3 vs VC	Downregulated	??-T3 vs VC	BP	GO:0061041	Regulation of wound healing	32/1437	133/18800	4.01714e-09	2.05598e-07	1.46895e-07	ANXA1/EPHB2/AJAP1/TNFRSF12A/HPSE/UBASH3B/CLDN4/FERMT2/TFPI/PDGFA/MYLK/HBEGF/PDGFRA/CCN4/ST3GAL4/PHLDB2/FOXC2/TBXA2R/PDGFB/SERPINE1/SMAD3/ACTA2/PLAT/F2RL1/F2R/ACTG1/KANK1/THBS1/CAV1/PLPP3/F3/EDN1	32
1198	downregulated.??-T3 vs VC	Downregulated	??-T3 vs VC	BP	GO:0001837	Epithelial to mesenchymal transition	36/1437	162/18800	4.39563e-09	2.22194e-07	1.58753e-07	EZH2/ENG/FLNA/HIF1A/ROCK2/WWTR1/PHLDB1/SNAI1/SFRP1/TGFB1/TBX3/ZNF703/FERMT2/NOTCH1/TCF7L2/MSX2/AXIN2/HMGA2/TGFB3/BAMBI/PHLDB2/SOX9/RFLNB/FOXF2/FAM83D/GLIPR2/SMAD3/FGFR2/TGFBR3/WNT5A/COL1A1/SMAD7/SNAI2/TGFB2/BMP4/EDN1	36
1199	downregulated.??-T3 vs VC	Downregulated	??-T3 vs VC	BP	GO:0008544	Epidermis development	60/1437	355/18800	4.41963e-09	2.22194e-07	1.58753e-07	TFDP1/YAP1/TRIOBP/EZH2/HDAC1/ANXA1/SLC4A7/EMP1/FLOT2/ZFP36L1/ROCK2/SCRIB/HPSE/SMO/FOSL2/FLG/LRP4/KRT8/SNAI1/ALDH3A2/PLEC/KAZN/KRT34/PDGFA/NOTCH1/PTCH1/HES1/MSX2/EPHA2/KRT81/HOXB13/KRT83/KRT86/ERCC2/COL7A1/SOX9/GLI2/PALLD/PAX6/FGFR2/SFN/ALX4/KRT85/WNT5A/LAMA5/FST/PITX2/TNFRSF19/CYP26B1/SOX18/KRT80/LGR5/LGR4/TGFB2/CCN2/INHBA/BMP4/NTF4/KRT84/POU2F3	60
1200	downregulated.??-T3 vs VC	Downregulated	??-T3 vs VC	BP	GO:0021537	Telencephalon development	47/1437	247/18800	4.6863e-09	2.33534e-07	1.66855e-07	EZH2/CDH2/HDAC1/EPHB2/NUMBL/PHLPP2/HIF1A/ATF5/BTBD3/SMO/GLI3/SHANK3/ASPM/NF2/SRF/NIN/IGF1R/CDK6/HES1/FAT4/DLX1/H2AX/NEFL/SLC8A1/MDGA1/NRGN/SLIT2/LHX1/KIRREL3/CNTNAP2/PAX6/DIXDC1/ATP2B4/WNT5A/NFIB/RARB/PLXNA4/DCLK2/SALL1/ALDH1A3/SEMA7A/OXTR/NRG1/INHBA/DRD1/BMP4/DLX5	47
1201	downregulated.??-T3 vs VC	Downregulated	??-T3 vs VC	BP	GO:0043010	Camera-type eye development	57/1437	330/18800	4.7836e-09	2.3631e-07	1.68838e-07	SMARCA4/OBSL1/TENM3/HDAC1/EPHB2/EFEMP1/CACNA1C/HIF1A/SKIL/NECTIN3/FBN1/TBX2/TGIF2/TCIRG1/GJA1/LRP5/CRYAB/GDF11/GLI3/LIMK2/NF2/SRF/RARG/VAX1/BMPR2/SHROOM2/WNT9A/BCAR3/PDGFRA/DLX1/EPHA2/MITF/NECTIN1/FAT1/CITED2/FZD4/SOX9/FOXC2/LHX1/FOXF2/PAX6/SMAD3/COL8A1/PDGFRB/ATP2B4/WNT5A/RHOJ/COL4A1/WNT7A/ALDH1A3/PITX2/WNT5B/WNT7B/TGFB2/CRYBA2/INHBA/BMP4	57
1202	downregulated.??-T3 vs VC	Downregulated	??-T3 vs VC	BP	GO:0048709	Oligodendrocyte differentiation	26/1437	94/18800	4.98407e-09	2.44091e-07	1.74397e-07	TENM4/HDAC1/SOX13/CNP/ERBB2/TMEM98/SLC45A3/MYRF/GLI3/ABCA2/WDR1/NOTCH1/PLP1/HES1/ZNF365/DLX1/CDKN2C/ERCC2/SOX9/DAAM2/PAX6/BOK/TRPC4/NRG1/TSPAN2/ZNF488	26
1203	downregulated.??-T3 vs VC	Downregulated	??-T3 vs VC	BP	GO:0010720	Positive regulation of cell development	53/1437	297/18800	5.21082e-09	2.53014e-07	1.80773e-07	TRIOBP/NIBAN2/OBSL1/DBN1/TENM4/HDAC1/EPHB2/NUMBL/FLNA/HIF1A/SKIL/CARMIL1/EFNA5/BAIAP2/SMO/TRIB1/PLXNA2/PLXNB1/TGFB1/CAPRIN2/GLI3/SHANK3/PLXNA1/ASPM/FERMT2/PDE5A/SRF/NIN/MYC/NOTCH1/BMPR2/HES1/ZNF365/NEFL/CLCF1/NEDD9/AMIGO1/PLXND1/SLIT2/E2F1/PAX6/DIXDC1/S100A10/TGM2/TIAM2/PLXNA4/SMAD7/BDNF/VEGFC/SEMA7A/WNT3/ZNF488/BMP4	53
1204	downregulated.??-T3 vs VC	Downregulated	??-T3 vs VC	BP	GO:0150063	Visual system development	63/1437	383/18800	5.42042e-09	2.60961e-07	1.86451e-07	SMARCA4/OBSL1/TENM3/HDAC1/EPHB2/EFEMP1/CACNA1C/HIF1A/SKIL/NECTIN3/FBN1/MEIS2/MFAP5/TBX2/TGIF2/TCIRG1/GJA1/LRP5/CRYAB/GDF11/GLI3/LIMK2/NF2/SRF/RARG/VAX1/BMPR2/SHROOM2/WNT9A/COL5A1/BCAR3/PDGFRA/DLX1/EPHA2/MITF/NECTIN1/FAT1/CITED2/FZD4/SOX9/FOXC2/PBX3/LHX1/FOXF2/PAX6/SMAD3/COL8A1/PDGFRB/ATP2B4/WNT5A/RHOJ/RARB/COL4A1/WNT7A/ALDH1A3/PITX2/WNT5B/PRDM1/WNT7B/TGFB2/CRYBA2/INHBA/BMP4	63
1205	downregulated.??-T3 vs VC	Downregulated	??-T3 vs VC	BP	GO:0043410	Positive regulation of mapk cascade	75/1437	491/18800	5.62493e-09	2.68532e-07	1.9186e-07	PPIA/CD44/EZH2/CDH2/TLR4/ROCK2/ERBB2/MID1/FZD8/MTURN/MAPKBP1/AJUBA/LPAR1/NDST1/HMGB1/TGFB1/DENND2B/NEK10/FERMT2/PDE5A/GADD45B/PLCE1/IGF1R/PDGFA/NOTCH1/CSPG4/BCAR3/PDGFRA/JCAD/FZD7/SH3RF2/GAS6/ANGPT1/AKAP12/TGFB3/FZD4/PDGFC/CD24/ADORA1/KITLG/EGF/GLIPR2/PDGFB/WWC1/FGFR2/DIXDC1/ACTA2/PDGFRB/TNFAIP8L3/WNT5A/NTF3/F2RL1/F2R/IL11/ADCYAP1/THBS1/WNT7A/BMPER/SEMA7A/NRG1/CAV2/TNFRSF19/PTPRJ/FGF1/ADRA1D/ACKR…	75
1206	downregulated.??-T3 vs VC	Downregulated	??-T3 vs VC	BP	GO:0010810	Regulation of cell-substrate adhesion	43/1437	217/18800	5.98179e-09	2.83188e-07	2.02331e-07	TRIOBP/NID1/PEAK1/AJAP1/LIMCH1/FLNA/DLC1/CORO1C/CARMIL1/ROCK2/EFNA5/CDKN2A/EMP2/ITGA5/COL16A1/SFRP1/NF2/FERMT2/RIN2/DDR1/NOTCH1/CDK6/FZD7/ACTN4/PLEKHA2/CSF1/NEDD9/FZD4/PHLDB2/VCL/CCDC80/PDGFB/SERPINE1/SMAD3/S100A10/COL8A1/CCN1/ACTG1/KANK1/COL1A1/THBS1/PTPRJ/GBP1	43
1207	downregulated.??-T3 vs VC	Downregulated	??-T3 vs VC	BP	GO:0065004	Protein-dna complex assembly	41/1437	203/18800	7.55194e-09	3.52737e-07	2.52022e-07	MCM2/SMARCA4/CENPF/H2BC5/HMGB2/H3C10/ZNF827/UBTF/H2BC13/H3C2/GMNN/H2BC6/H3C15/H3C14/RAD51/H3-3A/H2BC21/H4C14/H4C2/NASP/H4C15/HMGB1/THRA/H2BC11/BAZ1A/H2BC18/CENPX/CENPI/H2AX/H3C1/CHAF1B/H3C3/ASF1B/H2BC17/H3C13/SOX9/HELLS/H2BC3/H2BC1/H2BC14/TCF4	41
1208	downregulated.??-T3 vs VC	Downregulated	??-T3 vs VC	BP	GO:0033674	Positive regulation of kinase activity	73/1437	476/18800	7.57505e-09	3.52737e-07	2.52022e-07	PPIA/CLSPN/CCNB1/EZH2/ROR1/EPHB2/INCENP/RALB/TLR4/TYRO3/CALM2/EFNA5/ERBB2/AXL/EMP2/PSRC1/FZD8/AJUBA/CALM3/TGFB1/MET/NEK10/FERMT2/PDE5A/MALT1/IGF1R/CDC25B/CCDC88A/AFAP1L2/PDGFA/DDR1/BMPR2/HBEGF/PDGFRA/AXIN2/EPHA2/CAMKK1/MOB3B/HMGA2/GAS6/ANGPT1/CSF1/NEDD9/FZD4/PDGFC/CD24/EPHB6/ADORA1/KITLG/EGF/PDGFB/FGFR2/PDGFRB/TNFAIP8L3/ROS1/ATP2B4/WNT5A/NTF3/CCN1/CCND1/ADCYAP1/THBS1/VEGFC/IRS1/NRG1/GPRC5A/FGF1/A…	73
1209	downregulated.??-T3 vs VC	Downregulated	??-T3 vs VC	BP	GO:0007160	Cell-matrix adhesion	45/1437	235/18800	8.10845e-09	3.74505e-07	2.67575e-07	CD44/NID1/THSD1/PEAK1/COL13A1/AJAP1/LIMCH1/DLC1/ACTN1/CORO1C/ROCK2/EFNA5/CDKN2A/ITGA6/EMP2/HPSE/PXN/AJUBA/ZYX/EPDR1/ITGA5/COL16A1/SFRP1/NF2/FERMT2/BCAM/SRF/RIN2/DDR1/ITGA7/CDK6/PLEKHA2/CSF1/ADAMTS12/PHLDB2/VCL/SERPINE1/SMAD3/S100A10/COL5A3/ACTG1/THBS1/PTPRJ/ITGA4/CCN2	45
1210	downregulated.??-T3 vs VC	Downregulated	??-T3 vs VC	BP	GO:0050767	Regulation of neurogenesis	60/1437	361/18800	8.43405e-09	3.86402e-07	2.76076e-07	YAP1/EZH2/OBSL1/DBN1/TENM4/HDAC1/EPHB2/HMGB2/NUMBL/HIF1A/SKIL/EFNA5/BAIAP2/TMEM98/SMO/SEMA3F/LRP4/PLXNA2/SEMA4F/PLXNB1/TGFB1/CAPRIN2/PRTG/GLI3/SHANK3/PLXNA1/ASPM/NF2/SRF/CDKN2B/NIN/MYC/VAX1/NOTCH1/BMPR2/HES1/ZNF365/DLX1/NEFL/CLCF1/AMIGO1/PLXND1/SLIT2/E2F1/DAAM2/PAX6/DIXDC1/WNT5A/TGM2/SEMA3C/TIAM2/PLXNA4/WNT7A/BDNF/VEGFC/SEMA7A/WNT3/LIN28A/ZNF488/ID1	60
1211	downregulated.??-T3 vs VC	Downregulated	??-T3 vs VC	BP	GO:0030177	Positive regulation of wnt signaling pathway	33/1437	144/18800	8.54633e-09	3.88414e-07	2.77513e-07	YAP1/TBL1X/SMARCA4/DACT1/DEPDC1B/JRK/SFRP1/TGFB1/CAPRIN2/ASPM/SMURF2/TBL1XR1/CCN4/BAMBI/DAAM2/EGF/SMAD3/RECK/FGFR2/DIXDC1/WNT5A/KANK1/COL1A1/SALL1/CAV1/WNT3/WNT5B/LYPD6/NKD1/LGR5/LGR4/SOX4/DLX5	33
1212	downregulated.??-T3 vs VC	Downregulated	??-T3 vs VC	BP	GO:1903034	Regulation of response to wounding	36/1437	166/18800	8.74006e-09	3.94066e-07	2.81551e-07	ANXA1/EPHB2/AJAP1/FLNA/TNFRSF12A/PTPRF/HPSE/KREMEN1/UBASH3B/CLDN4/FERMT2/TFPI/IGF1R/PDGFA/MYLK/HBEGF/PDGFRA/CCN4/ST3GAL4/PHLDB2/FOXC2/TBXA2R/PDGFB/SERPINE1/SMAD3/ACTA2/PLAT/F2RL1/F2R/ACTG1/KANK1/THBS1/CAV1/PLPP3/F3/EDN1	36
1213	downregulated.??-T3 vs VC	Downregulated	??-T3 vs VC	BP	GO:0090066	Regulation of anatomical structure size	74/1437	487/18800	8.94121e-09	3.99961e-07	2.85763e-07	KCNMA1/TRIOBP/COTL1/DBN1/VASP/ARPC5/AKT3/SVIL/CARMIL1/CPS1/ADD2/ROCK2/EFNA5/BAIAP2/EPS8/RIN3/SEMA3F/EVL/GSN/CIT/SPTAN1/KIRREL1/SLC12A9/SEMA4F/TMSB10/PRR16/FHOD3/HRH1/SHANK3/SPTB/ARHGAP28/ARHGAP42/SRF/RARG/WDR1/BMPR2/TMOD2/CARMIL2/NEFL/SLC8A1/ADM/RAB3B/PLEKHG2/KCNMB1/CDC42EP3/ADORA1/FOXC2/SLIT2/EZR/TBXA2R/KCNN4/DAAM2/LIMA1/ACTA2/WNT5A/F2RL1/F2R/SEMA3C/KANK1/PLXNA4/WNT7A/BDNF/SEMA7A/CAV1/OXTR/WNT3/…	74
1214	downregulated.??-T3 vs VC	Downregulated	??-T3 vs VC	BP	GO:0032835	Glomerulus development	21/1437	66/18800	9.64816e-09	4.28212e-07	3.05948e-07	MYO1E/NID1/WWTR1/PLCE1/BASP1/NOTCH1/PDGFRA/HES1/PODXL/ANGPT1/CD24/FOXC2/LHX1/KIRREL3/PDGFB/NOTCH3/ACTA2/PDGFRB/SERPINB7/LGR4/BMP4	21
1215	downregulated.??-T3 vs VC	Downregulated	??-T3 vs VC	BP	GO:0048880	Sensory system development	63/1437	389/18800	1.00243e-08	4.41458e-07	3.15412e-07	SMARCA4/OBSL1/TENM3/HDAC1/EPHB2/EFEMP1/CACNA1C/HIF1A/SKIL/NECTIN3/FBN1/MEIS2/MFAP5/TBX2/TGIF2/TCIRG1/GJA1/LRP5/CRYAB/GDF11/GLI3/LIMK2/NF2/SRF/RARG/VAX1/BMPR2/SHROOM2/WNT9A/COL5A1/BCAR3/PDGFRA/DLX1/EPHA2/MITF/NECTIN1/FAT1/CITED2/FZD4/SOX9/FOXC2/PBX3/LHX1/FOXF2/PAX6/SMAD3/COL8A1/PDGFRB/ATP2B4/WNT5A/RHOJ/RARB/COL4A1/WNT7A/ALDH1A3/PITX2/WNT5B/PRDM1/WNT7B/TGFB2/CRYBA2/INHBA/BMP4	63
1216	downregulated.??-T3 vs VC	Downregulated	??-T3 vs VC	BP	GO:0050673	Epithelial cell proliferation	69/1437	443/18800	1.03323e-08	4.51523e-07	3.22603e-07	YAP1/SPARC/HMGB2/AKT3/HIF1A/ZFP36L1/LAMC1/ERBB2/TBX2/SMO/SIX1/TNFSF12/NRP2/SFRP1/HMGB1/TGFB1/ZNF703/CDKN2B/MYC/RPS6KA1/NOTCH1/TCF7L2/BMPR2/PTCH1/CDK6/PIK3CD/HES1/GLUL/JCAD/EPHA2/FZD7/SOX9/EGF/CCR3/PDGFB/PAX6/SMAD3/FGFR2/SFN/COL8A1/TGFBR3/WNT5A/NFIB/APLN/NKX3-1/EFNB2/FST/NR2F2/CCND1/THBS1/WNT7A/BMPER/VEGFC/DLX6/CAV1/CAV2/SNAI2/UHRF1/FGF1/LGR5/ITGA4/LGR4/TGFB2/BMP4/DLX5/FGFBP1/ID1/F3/ATOH8	69
1217	downregulated.??-T3 vs VC	Downregulated	??-T3 vs VC	BP	GO:0010594	Regulation of endothelial cell migration	44/1437	230/18800	1.22196e-08	5.2992e-07	3.78616e-07	SPARC/ANXA1/AKT3/HIF1A/ROCK2/BCAR1/EMP2/NRP2/HMGB1/TGFB1/MET/STARD13/HSPB1/RIN2/NOTCH1/BMPR2/PIK3CD/GLUL/JCAD/EPHA2/ANGPT1/FOXC2/SLIT2/TBXA2R/EGF/PDGFB/RHOB/ATP2B4/WNT5A/RHOJ/NR2F2/CCBE1/THBS1/WNT7A/BMPER/VEGFC/FGF1/PLPP3/PLK2/BMP4/FGFBP1/CARD10/EDN1/ATOH8	44
1218	downregulated.??-T3 vs VC	Downregulated	??-T3 vs VC	BP	GO:0044319	Wound healing, spreading of cells	15/1437	35/18800	1.24156e-08	5.30321e-07	3.78903e-07	CD44/FLNA/AJUBA/MRTFA/ITGA5/FERMT2/ARHGAP24/DDR1/COL5A1/HBEGF/CARMIL2/MSX2/PHLDB2/CCN1/WNT7A	15
1219	downregulated.??-T3 vs VC	Downregulated	??-T3 vs VC	BP	GO:0090505	Epiboly involved in wound healing	15/1437	35/18800	1.24156e-08	5.30321e-07	3.78903e-07	CD44/FLNA/AJUBA/MRTFA/ITGA5/FERMT2/ARHGAP24/DDR1/COL5A1/HBEGF/CARMIL2/MSX2/PHLDB2/CCN1/WNT7A	15
1220	downregulated.??-T3 vs VC	Downregulated	??-T3 vs VC	BP	GO:0022604	Regulation of cell morphogenesis	53/1437	305/18800	1.33833e-08	5.67393e-07	4.05389e-07	SPARC/TRIOBP/CD44/OBSL1/DBN1/LIMD1/ANXA1/MYO10/EPHB2/PALM2AKAP2/FBLIM1/FLNA/DLC1/CORO1C/CARMIL1/EFNA5/BAIAP2/EPS8/ZMYM3/NTNG1/MYH9/PLXNA2/STRIP2/LPAR1/PLXNB1/CAPRIN2/CLDN4/PLXNA1/FERMT2/ARPIN/WDR1/WTIP/ITGA7/RHOBTB1/RHOBTB3/ACTN4/NEDD9/CDC42EP3/BAMBI/FZD4/PLXND1/EZR/FAM171A1/RHOB/PALM/S100A10/WNT5A/RHOJ/KANK1/SHROOM3/PLXNA4/TPM1/GBP1	53
1221	downregulated.??-T3 vs VC	Downregulated	??-T3 vs VC	BP	GO:0050808	Synapse organization	66/1437	419/18800	1.37986e-08	5.80667e-07	4.14873e-07	CDH2/OBSL1/DBN1/EPHB2/FARP1/FLNA/LRFN3/ACTN1/PTPRF/ADD2/EFNA5/ERBB2/BAIAP2/PCDHGC3/TUBB/FLRT2/NEFH/NTNG1/PDLIM5/SEMA3F/SIX1/HSPA8/SRGN/LRP4/NRP2/PLXNB1/NLGN2/CAPRIN2/SHANK3/CACNB3/IGF1R/LRRC4B/FZD1/ZNF365/TUBA1A/NEFL/MDGA1/DOCK10/ZDHHC12/NECTIN1/ACTB/FRMPD4/LRFN4/COL4A5/AMIGO1/AGRN/PLXND1/KIRREL3/ST8SIA2/PALM/AMIGO2/WNT5A/CTNND2/F2R/EFNB2/SYNPO/ACTG1/COL4A1/WNT7A/BDNF/OXTR/NRG1/CBLN1/WNT7B/ACTBL2…	66
1222	downregulated.??-T3 vs VC	Downregulated	??-T3 vs VC	BP	GO:0051492	Regulation of stress fiber assembly	25/1437	92/18800	1.45301e-08	6.06953e-07	4.33654e-07	LIMCH1/DLC1/CARMIL1/ROCK2/ASAP3/EVL/PXN/LPAR1/SFRP1/MET/ARHGAP28/NF2/FERMT2/CCDC88A/STMN1/CGNL1/TGFB3/PHLDB2/SMAD3/S100A10/S1PR1/ACTG1/TPM1/SYNPO2L/CCN2	25
1223	downregulated.??-T3 vs VC	Downregulated	??-T3 vs VC	BP	GO:0010632	Regulation of epithelial cell migration	51/1437	290/18800	1.66941e-08	6.92255e-07	4.94601e-07	SPARC/ANXA1/AKT3/HIF1A/CORO1C/IQSEC1/ROCK2/BCAR1/EMP2/EVL/NRP2/HMGB1/TGFB1/MET/STARD13/HSPB1/RIN2/NOTCH1/BMPR2/HBEGF/PIK3CD/GLUL/JCAD/EPHA2/ANGPT1/SOX9/FOXC2/SLIT2/TBXA2R/EGF/GLIPR2/PDGFB/RHOB/ATP2B4/WNT5A/RHOJ/NR2F2/CCBE1/THBS1/WNT7A/BMPER/VEGFC/FGF1/PLPP3/PLK2/TGFB2/BMP4/FGFBP1/CARD10/EDN1/ATOH8	51
1224	downregulated.??-T3 vs VC	Downregulated	??-T3 vs VC	BP	GO:0090504	Epiboly	15/1437	36/18800	1.97816e-08	8.14344e-07	5.81831e-07	CD44/FLNA/AJUBA/MRTFA/ITGA5/FERMT2/ARHGAP24/DDR1/COL5A1/HBEGF/CARMIL2/MSX2/PHLDB2/CCN1/WNT7A	15
1225	downregulated.??-T3 vs VC	Downregulated	??-T3 vs VC	BP	GO:0007346	Regulation of mitotic cell cycle	72/1437	478/18800	2.05378e-08	8.39388e-07	5.99724e-07	TFDP1/CENPF/CLSPN/CCNB1/EZH2/OBSL1/FANCD2/ANXA1/DTL/NACC2/MAP3K20/GTSE1/STAT5B/FBXO5/ATAD5/ZFP36L1/GMNN/CDKN2A/DACT1/SCRIB/MEIS2/UBE2C/NEK6/LRP5/XRCC3/TTLL12/CTDSPL/CDCA2/RBL1/CDC25A/PLK1/CDKN2B/MKI67/MYC/CDC25B/ANLN/CDC14A/AFAP1L2/PKMYT1/FOXN3/PTCH1/ESPL1/HES1/HECW2/CDKN2C/ZWINT/WEE1/HOXA13/HMGA2/NABP1/USP2/SPDL1/ERCC2/CDK1/FHL1/RRM2/E2F1/EGF/PDGFB/PKIA/CDC7/PDGFRB/NKX3-1/CDK2/CCND1/KANK2/CAV2/B…	72
1226	downregulated.??-T3 vs VC	Downregulated	??-T3 vs VC	BP	GO:0032331	Negative regulation of chondrocyte differentiation	12/1437	23/18800	2.3233e-08	9.39595e-07	6.71319e-07	EFEMP1/ADAMTS7/RARG/WNT9A/CCN4/ADAMTS12/SOX9/RFLNB/RARB/SNAI2/ZNF664-RFLNA/BMP4	12
1227	downregulated.??-T3 vs VC	Downregulated	??-T3 vs VC	BP	GO:0061326	Renal tubule development	25/1437	94/18800	2.33203e-08	9.39595e-07	6.71319e-07	YAP1/GREB1L/WWTR1/SMO/SIX1/IRX3/GLI3/CTNNBIP1/MYC/FOXD1/NOTCH1/PTCH1/HES1/CD24/SOX9/LHX1/SIX2/LAMA5/COL4A1/SALL1/FGF1/WNT7B/LGR5/LGR4/BMP4	25
1228	downregulated.??-T3 vs VC	Downregulated	??-T3 vs VC	BP	GO:0110020	Regulation of actomyosin structure organization	26/1437	101/18800	2.56062e-08	1.02443e-06	7.31931e-07	LIMCH1/DLC1/CARMIL1/ROCK2/ASAP3/EVL/PXN/LPAR1/SFRP1/MET/ARHGAP28/NF2/FERMT2/CCDC88A/STMN1/CGNL1/TGFB3/PHLDB2/SMAD3/S100A10/S1PR1/ACTG1/TPM1/SYNPO2L/CCN2/EDN1	26
1229	downregulated.??-T3 vs VC	Downregulated	??-T3 vs VC	BP	GO:0071772	Response to bmp	36/1437	173/18800	2.73274e-08	1.07811e-06	7.70282e-07	ENG/SKIL/FBN1/NEO1/RGMB/SFRP1/TGFB1/CRIM1/ADAMTS7/FOXD1/NOTCH1/BMPR2/SMURF2/FZD1/HES1/MSX2/DLX1/HOXA13/RUNX2/ADAMTS12/TGFB3/BAMBI/FSTL1/SOX9/SMAD3/TGFBR3/WNT5A/CCN1/FST/SMAD7/BMPER/SMAD9/SMAD6/TGFB2/BMP4/DLX5	36
1230	downregulated.??-T3 vs VC	Downregulated	??-T3 vs VC	BP	GO:0071773	Cellular response to bmp stimulus	36/1437	173/18800	2.73274e-08	1.07811e-06	7.70282e-07	ENG/SKIL/FBN1/NEO1/RGMB/SFRP1/TGFB1/CRIM1/ADAMTS7/FOXD1/NOTCH1/BMPR2/SMURF2/FZD1/HES1/MSX2/DLX1/HOXA13/RUNX2/ADAMTS12/TGFB3/BAMBI/FSTL1/SOX9/SMAD3/TGFBR3/WNT5A/CCN1/FST/SMAD7/BMPER/SMAD9/SMAD6/TGFB2/BMP4/DLX5	36
1231	downregulated.??-T3 vs VC	Downregulated	??-T3 vs VC	BP	GO:2000027	Regulation of animal organ morphogenesis	30/1437	129/18800	2.81379e-08	1.10242e-06	7.87658e-07	ROR1/AJAP1/DACT1/SMO/SIX1/SFRP1/PDGFA/SMURF2/FZD1/FZD2/FZD7/VANGL1/RUNX2/CSF1/HOXC11/CITED2/SOX9/LHX1/SIX2/WNT5A/PRICKLE1/WNT7A/PRICKLE2/SNAI2/FGF1/NKD1/LGR4/TNFRSF11B/BMP4/EDN1	30
1232	downregulated.??-T3 vs VC	Downregulated	??-T3 vs VC	BP	GO:0061005	Cell differentiation involved in kidney development	19/1437	58/18800	2.84828e-08	1.10829e-06	7.9185e-07	YAP1/MYO1E/WWTR1/SMO/GLI3/BASP1/NOTCH1/PTCH1/HES1/PODXL/CD24/FOXC2/LHX1/PDGFB/SIX2/ACTA2/SALL1/LGR4/BMP4	19
1233	downregulated.??-T3 vs VC	Downregulated	??-T3 vs VC	BP	GO:0050678	Regulation of epithelial cell proliferation	61/1437	382/18800	2.92678e-08	1.12345e-06	8.02678e-07	YAP1/SPARC/HMGB2/AKT3/HIF1A/ZFP36L1/LAMC1/ERBB2/SMO/SIX1/TNFSF12/NRP2/SFRP1/HMGB1/TGFB1/ZNF703/CDKN2B/MYC/NOTCH1/TCF7L2/BMPR2/PTCH1/CDK6/PIK3CD/HES1/GLUL/JCAD/FZD7/SOX9/EGF/CCR3/PDGFB/PAX6/SMAD3/FGFR2/SFN/TGFBR3/WNT5A/NFIB/APLN/NKX3-1/EFNB2/NR2F2/CCND1/THBS1/WNT7A/VEGFC/DLX6/CAV1/CAV2/SNAI2/UHRF1/FGF1/ITGA4/TGFB2/BMP4/DLX5/FGFBP1/ID1/F3/ATOH8	61
1234	downregulated.??-T3 vs VC	Downregulated	??-T3 vs VC	BP	GO:0050878	Regulation of body fluid levels	61/1437	382/18800	2.92678e-08	1.12345e-06	8.02678e-07	ELOVL1/PPIA/ITPK1/MYL12A/EPHB2/MYL9/FLNA/TLR4/DGKH/STAT5B/HIF1A/CD59/TYRO3/AXL/EMP2/HPSE/GJA1/FLG/MYH9/FLI1/UBASH3B/MET/COX2/CLDN4/PLEC/TFPI/HSPB1/SRF/SOCS2/PDGFA/DDR1/PDGFRA/STMN1/ADM/GAS6/HYAL2/RAP2B/ACTB/SLC29A1/ST3GAL4/ADORA1/VCL/TBXA2R/KCNN4/PDGFB/SERPINE1/ANXA8/SFN/PLAT/APLN/F2RL1/F2R/ACTG1/CCND1/THBS1/CAV1/OXTR/CYP26B1/NPPB/F3/EDN1	61
1235	downregulated.??-T3 vs VC	Downregulated	??-T3 vs VC	BP	GO:0060412	Ventricular septum morphogenesis	16/1437	42/18800	3.08396e-08	1.17584e-06	8.40111e-07	NSD2/TBX3/NOTCH1/BMPR2/FZD1/FZD2/HES1/CITED2/SLIT2/FGFR2/TGFBR3/WNT5A/SMAD7/TGFB2/SOX4/BMP4	16
1236	downregulated.??-T3 vs VC	Downregulated	??-T3 vs VC	BP	GO:0048565	Digestive tract development	30/1437	130/18800	3.39401e-08	1.28542e-06	9.18406e-07	YAP1/CLMP/HIF1A/CPS1/DACT1/TBX2/SMO/SFRP1/GLI3/NOTCH1/TYMS/PDGFRA/HES1/HOXA13/TGFB3/PDGFC/GLI2/FOXF2/SIX2/SMAD3/FGFR2/ALX4/WNT5A/RARB/SALL1/OXTR/PRDM1/LGR4/TGFB2/BMP4	30
1237	downregulated.??-T3 vs VC	Downregulated	??-T3 vs VC	BP	GO:1901654	Response to ketone	38/1437	190/18800	3.48792e-08	1.31224e-06	9.37569e-07	YAP1/MTAP/PCNA/CPS1/ROCK2/EFNA5/NASP/CALM3/SFRP1/TGFB1/ADCY3/CLDN4/HOXA10/SGK1/MYC/IGF1R/TYMS/NEFL/HOXB13/HOXA13/GAS6/GNAI1/TGFB3/SLIT2/TBXA2R/CDA/GNG2/PLAT/TGFBR3/NKX3-1/CCND1/PTGFR/THBS1/CAV1/OXTR/TRERF1/TGFB2/EDN1	38
1238	downregulated.??-T3 vs VC	Downregulated	??-T3 vs VC	BP	GO:0050769	Positive regulation of neurogenesis	42/1437	222/18800	3.63419e-08	1.35828e-06	9.70459e-07	OBSL1/DBN1/TENM4/HDAC1/EPHB2/NUMBL/HIF1A/SKIL/EFNA5/BAIAP2/SMO/PLXNA2/PLXNB1/TGFB1/CAPRIN2/GLI3/SHANK3/PLXNA1/ASPM/SRF/NIN/MYC/NOTCH1/BMPR2/HES1/ZNF365/NEFL/CLCF1/AMIGO1/PLXND1/SLIT2/E2F1/PAX6/DIXDC1/TGM2/TIAM2/PLXNA4/BDNF/VEGFC/SEMA7A/WNT3/ZNF488	42
1239	downregulated.??-T3 vs VC	Downregulated	??-T3 vs VC	BP	GO:0007548	Sex differentiation	49/1437	281/18800	4.18836e-08	1.55517e-06	1.11113e-06	HMGB2/GREB1L/STAT5B/TYRO3/AXL/FANCA/H3-3A/GJA1/DHCR24/FKBP4/NASP/SDC1/SFRP1/TBX3/ASPM/HOXA10/MYC/BASP1/PDGFA/PDGFRA/CENPI/RHOBTB3/HOXA13/TFAP2C/CITED2/FZD4/SOX9/SLIT2/KITLG/LHX1/GFRA1/FOXF2/MAMLD1/BOK/PDGFRB/WNT5A/NKX3-1/ARID5B/BRIP1/FST/NR2F2/CCND1/SALL1/WNT7A/LGR4/TGFB2/CBX2/LFNG/INHBA	49
1240	downregulated.??-T3 vs VC	Downregulated	??-T3 vs VC	BP	GO:0051056	Regulation of small gtpase mediated signal transduction	51/1437	299/18800	4.67507e-08	1.72462e-06	1.2322e-06	ARHGAP21/RALBP1/EPHB2/FOXM1/DLC1/IQSEC1/ARHGAP23/CYTH3/TRIO/EPS8/ITPKB/SIPA1L2/ABCA1/ARHGEF40/ITSN1/KALRN/LPAR1/MET/PSD3/STARD13/ARHGAP28/ARHGAP42/DOCK2/ARHGAP29/PLCE1/ARHGAP24/NOTCH1/ARHGAP31/STMN1/GARNL3/AUTS2/PLEKHG4B/EPS8L2/CSF1/CGNL1/SLIT2/KITLG/STARD8/PDGFRB/F2RL1/F2R/ARHGDIB/TGM2/TIAM2/KANK1/KANK2/NRG1/SYNPO2L/LPAR4/PLEKHG4/TGFB2	51
1241	downregulated.??-T3 vs VC	Downregulated	??-T3 vs VC	BP	GO:0072009	Nephron epithelium development	27/1437	111/18800	5.06202e-08	1.85531e-06	1.32558e-06	YAP1/MYO1E/GREB1L/WWTR1/SMO/SIX1/IRX3/GLI3/CTNNBIP1/MYC/FOXD1/BASP1/NOTCH1/PTCH1/HES1/PODXL/CD24/SOX9/FOXC2/LHX1/SIX2/LAMA5/SALL1/FGF1/WNT7B/LGR4/BMP4	27
1242	downregulated.??-T3 vs VC	Downregulated	??-T3 vs VC	BP	GO:0090596	Sensory organ morphogenesis	47/1437	266/18800	5.20487e-08	1.89544e-06	1.35425e-06	TRIOBP/OBSL1/TENM3/HDAC1/EPHB2/EFEMP1/HIF1A/NECTIN3/FBN1/SCRIB/MFAP5/TBX2/SIX1/LRP5/GDF11/GLI3/TBX3/RARG/SHROOM2/WNT9A/COL5A1/GBX2/BCAR3/FZD2/EPHA2/NECTIN1/FAT1/CITED2/SOX9/LHX1/FOXF2/INSIG1/LRIG3/SIX2/PAX6/FGFR2/COL8A1/WNT5A/RARB/ALDH1A3/DLX6/PITX2/PRDM1/CYP26B1/BMP4/DLX5/EDN1	47
1243	downregulated.??-T3 vs VC	Downregulated	??-T3 vs VC	BP	GO:1902105	Regulation of leukocyte differentiation	49/1437	283/18800	5.27273e-08	1.90792e-06	1.36317e-06	FANCD2/ANXA1/SOX13/CBFB/SOCS5/TLR4/STAT5B/IL4R/FBN1/ZFP36L1/PPARGC1B/ERBB2/AXL/ITPKB/FANCA/TRIB1/ZNF675/SFRP1/HMGB1/TGFB1/RUNX1/UBASH3B/TMEM64/GLI3/CTNNBIP1/TNFSF9/MALT1/MYC/VSIR/CAMK4/HMGB3/CDK6/MITF/GAS6/TMEM131L/TOX/CSF1/GLI2/KITLG/KLF10/NLRP3/LRRC17/SMAD7/IL7R/PRDM1/CYP26B1/SOX4/INHBA/BMP4	49
1244	downregulated.??-T3 vs VC	Downregulated	??-T3 vs VC	BP	GO:0071559	Response to transforming growth factor beta	46/1437	258/18800	5.4408e-08	1.95628e-06	1.39772e-06	FUT8/ENG/CHST11/SKIL/FBN1/ZFP36L1/ROCK2/PXN/ZYX/SFRP1/TGFB1/C20orf27/COL4A2/ZNF703/FERMT2/FURIN/CDKN2B/PMEPA1/IGF1R/PDGFA/SMURF2/DLX1/HYAL2/LTBP2/TGFB3/CITED2/BAMBI/SOX9/SMAD3/FGFR2/TGFBR3/WNT5A/ANKRD1/COL1A1/SMAD7/THBS1/WNT7A/CAV1/CAV2/SMAD9/NREP/SMAD6/TGFB2/ITGB8/ID1/EDN1	46
1245	downregulated.??-T3 vs VC	Downregulated	??-T3 vs VC	BP	GO:0031214	Biomineral tissue development	35/1437	170/18800	5.62756e-08	2.0107e-06	1.4366e-06	FBXO5/HIF1A/ROCK2/TCIRG1/GJA1/SRGN/TGFB1/BCOR/SLC24A3/NOTCH1/BMPR2/MSX2/AXIN2/SLC8A1/GAS6/NECTIN1/PHOSPHO1/TGFB3/ERCC2/SOX9/RFLNB/KLF10/TENT5A/SMAD3/FGFR2/S1PR1/CCN1/COL1A1/FAM20C/ZNF664-RFLNA/ADRB2/FGFR3/LGR4/ODAPH/BMP4	35
1246	downregulated.??-T3 vs VC	Downregulated	??-T3 vs VC	BP	GO:1903706	Regulation of hemopoiesis	59/1437	371/18800	5.71948e-08	2.02671e-06	1.44804e-06	FANCD2/ANXA1/SOX13/CBFB/HMGB2/SOCS5/TLR4/STAT5B/HIF1A/IL4R/FBN1/ZFP36L1/PPARGC1B/ERBB2/AXL/MEIS2/ITPKB/FANCA/TRIB1/H4C14/MTURN/H4C2/H4C15/ZNF675/SFRP1/HMGB1/TGFB1/RUNX1/UBASH3B/TMEM64/GLI3/CTNNBIP1/TNFSF9/MALT1/RARG/MYC/VSIR/CAMK4/HMGB3/CDK6/MITF/GAS6/TMEM131L/TOX/CSF1/PRMT6/GLI2/KITLG/KLF10/NLRP3/LRRC17/RAB7B/SMAD7/IL7R/PRDM1/CYP26B1/SOX4/INHBA/BMP4	59
1247	downregulated.??-T3 vs VC	Downregulated	??-T3 vs VC	BP	GO:0150115	Cell-substrate junction organization	25/1437	98/18800	5.74371e-08	2.02671e-06	1.44804e-06	THSD1/PEAK1/LIMCH1/DLC1/ACTN1/CORO1C/IQSEC1/ROCK2/EFNA5/DST/LAMC1/ITGA6/AJUBA/ITGA5/COL16A1/SFRP1/PLEC/FERMT2/PHLDB2/VCL/SMAD3/S100A10/ACTG1/THBS1/PTPRJ	25
1248	downregulated.??-T3 vs VC	Downregulated	??-T3 vs VC	BP	GO:0006334	Nucleosome assembly	29/1437	126/18800	6.08444e-08	2.13368e-06	1.52447e-06	MCM2/H2BC5/HMGB2/H3C10/H2BC13/H3C2/H2BC6/H3C15/H3C14/H3-3A/H2BC21/H4C14/H4C2/NASP/H4C15/H2BC11/BAZ1A/H2BC18/H2AX/H3C1/CHAF1B/H3C3/ASF1B/H2BC17/H3C13/SOX9/H2BC3/H2BC1/H2BC14	29
1249	downregulated.??-T3 vs VC	Downregulated	??-T3 vs VC	BP	GO:0007044	Cell-substrate junction assembly	24/1437	92/18800	6.63454e-08	2.31232e-06	1.6521e-06	THSD1/PEAK1/LIMCH1/DLC1/ACTN1/CORO1C/ROCK2/EFNA5/DST/LAMC1/ITGA6/AJUBA/ITGA5/COL16A1/SFRP1/PLEC/FERMT2/PHLDB2/VCL/SMAD3/S100A10/ACTG1/THBS1/PTPRJ	24
1250	downregulated.??-T3 vs VC	Downregulated	??-T3 vs VC	BP	GO:0030099	Myeloid cell differentiation	61/1437	391/18800	6.94899e-08	2.39427e-06	1.71065e-06	G6PD/CBFB/HMGB2/GLO1/TLR4/STAT5B/HIF1A/ACTN1/FBN1/ZFP36L1/PPARGC1B/MEIS2/ITPKB/TRIB1/TCIRG1/ANXA2/H4C14/MTURN/H4C2/MYH9/H4C15/ZNF675/SFRP1/FASN/FLI1/THRA/TGFB1/RUNX1/UBASH3B/TMEM64/CTNNBIP1/SRF/CDKN2B/RARG/MYC/WDR1/CAMK4/HMGB3/LBR/CDK6/PIK3CD/EPHA2/MITF/CCN4/CSF1/CITED2/ERCC2/PRMT6/KITLG/KLF10/TRIM58/LRRC17/TGFBR3/RAB7B/F2RL1/IL11/FAM20C/TSPAN2/ITGB8/INHBA/BMP4	61
1251	downregulated.??-T3 vs VC	Downregulated	??-T3 vs VC	BP	GO:0048562	Embryonic organ morphogenesis	50/1437	294/18800	6.95396e-08	2.39427e-06	1.71065e-06	YAP1/TRIOBP/EPHB2/EFEMP1/ENG/HIF1A/CHST11/FBN1/SCRIB/MFAP5/TBX2/SMO/SIX1/GJA1/SUFU/NDST1/GLI3/TBX3/SRF/RARG/NOTCH1/GBX2/PDGFRA/FZD2/HES1/EPHA2/RUNX2/HOXC11/TGFB3/CITED2/SOX9/FOXC2/LHX1/FOXF2/INSIG1/LRIG3/SIX2/PAX6/SMAD3/FGFR2/TEAD2/ALX4/WNT5A/RARB/ALDH1A3/DLX6/SOX18/BMP4/DLX5/EDN1	50
1252	downregulated.??-T3 vs VC	Downregulated	??-T3 vs VC	BP	GO:0007435	Salivary gland morphogenesis	14/1437	34/18800	7.06972e-08	2.41946e-06	1.72865e-06	TGFB1/PLXNA1/PDGFA/TGFB3/PLXND1/PAX6/FGFR2/NFIB/NKX3-1/TGM2/LAMA5/SEMA3C/SNAI2/TGFB2	14
1253	downregulated.??-T3 vs VC	Downregulated	??-T3 vs VC	BP	GO:0007163	Establishment or maintenance of cell polarity	41/1437	219/18800	7.13405e-08	2.42686e-06	1.73394e-06	ACTR3/ARPC5/FLOT2/ROCK2/DST/CYTH3/SCRIB/TCIRG1/GSN/GJA1/MYH9/PLK1/PDLIM1/LMNA/DOCK2/WDR1/IGF1R/CARMIL2/FSCN1/RHOBTB1/HES1/RHOBTB3/MTCL1/WEE1/ACTB/FAT1/SPDL1/SPN/AMOTL2/WWC1/RHOB/PAX6/LRRC7/WNT5A/ANK1/KANK1/ALPK2/WNT7A/WNT7B/CYP26B1/MISP	41
1254	downregulated.??-T3 vs VC	Downregulated	??-T3 vs VC	BP	GO:0071560	Cellular response to transforming growth factor beta stimulus	45/1437	252/18800	7.22126e-08	2.44077e-06	1.74388e-06	FUT8/ENG/CHST11/SKIL/FBN1/ZFP36L1/PXN/ZYX/SFRP1/TGFB1/C20orf27/COL4A2/ZNF703/FERMT2/FURIN/CDKN2B/PMEPA1/IGF1R/PDGFA/SMURF2/DLX1/HYAL2/LTBP2/TGFB3/CITED2/BAMBI/SOX9/SMAD3/FGFR2/TGFBR3/WNT5A/ANKRD1/COL1A1/SMAD7/THBS1/WNT7A/CAV1/CAV2/SMAD9/NREP/SMAD6/TGFB2/ITGB8/ID1/EDN1	45
1255	downregulated.??-T3 vs VC	Downregulated	??-T3 vs VC	BP	GO:0046661	Male sex differentiation	34/1437	164/18800	7.26087e-08	2.44077e-06	1.74388e-06	HMGB2/GREB1L/STAT5B/FANCA/H3-3A/GJA1/DHCR24/FKBP4/NASP/SDC1/SFRP1/TBX3/ASPM/HOXA10/PDGFA/PDGFRA/RHOBTB3/HOXA13/TFAP2C/CITED2/SOX9/KITLG/GFRA1/MAMLD1/BOK/PDGFRB/WNT5A/NKX3-1/ARID5B/BRIP1/CCND1/LGR4/TGFB2/INHBA	34
1256	downregulated.??-T3 vs VC	Downregulated	??-T3 vs VC	BP	GO:0016049	Cell growth	71/1437	484/18800	7.56856e-08	2.52923e-06	1.80708e-06	G6PD/YAP1/ALCAM/SMARCA4/DBN1/TEAD1/SLC9A6/NDN/EFNA5/CDKN2A/EXTL3/ERBB2/BCAR1/HDGFL2/PSRC1/PDLIM5/H3-3A/SEMA3F/GJA1/DCBLD2/NRP2/SEMA4F/CRYAB/SFRP1/TGFB1/CAPRIN2/EXOSC9/PLXNA1/SRF/RARG/SOCS2/NIN/PLCE1/SGK1/RPS6KA1/DDR1/IGFBPL1/BMPR2/SH3BP4/GNG4/HBEGF/CDKN2C/CCDC85B/AUTS2/HYAL2/FHL1/SOX9/VCL/SLIT2/SORBS2/CDA/N6AMT1/ST8SIA2/SMAD3/SFN/ROS1/WNT5A/TMEM97/SEMA3C/PLXNA4/SMAD7/BDNF/SEMA7A/WNT3/PTPRJ/NPPB/R…	71
1257	downregulated.??-T3 vs VC	Downregulated	??-T3 vs VC	BP	GO:0110148	Biomineralization	35/1437	172/18800	7.645e-08	2.53984e-06	1.81466e-06	FBXO5/HIF1A/ROCK2/TCIRG1/GJA1/SRGN/TGFB1/BCOR/SLC24A3/NOTCH1/BMPR2/MSX2/AXIN2/SLC8A1/GAS6/NECTIN1/PHOSPHO1/TGFB3/ERCC2/SOX9/RFLNB/KLF10/TENT5A/SMAD3/FGFR2/S1PR1/CCN1/COL1A1/FAM20C/ZNF664-RFLNA/ADRB2/FGFR3/LGR4/ODAPH/BMP4	35
1258	downregulated.??-T3 vs VC	Downregulated	??-T3 vs VC	BP	GO:0060993	Kidney morphogenesis	24/1437	93/18800	8.30069e-08	2.74164e-06	1.95884e-06	GREB1L/WWTR1/SMO/SIX1/IRX3/GLI3/CTNNBIP1/MYC/FOXD1/BASP1/PTCH1/HES1/SOX9/GCNT1/LHX1/SIX2/PDGFRB/LAMA5/SALL1/FGF1/WNT7B/LGR4/SOX4/BMP4	24
1259	downregulated.??-T3 vs VC	Downregulated	??-T3 vs VC	BP	GO:0071824	Protein-dna complex subunit organization	43/1437	237/18800	8.78853e-08	2.88599e-06	2.06198e-06	MCM2/SMARCC2/SMARCA4/CENPF/H2BC5/HMGB2/H3C10/ZNF827/UBTF/H2BC13/H3C2/GMNN/H2BC6/H3C15/H3C14/RAD51/H3-3A/H2BC21/H4C14/H4C2/NASP/H4C15/HMGB1/THRA/H2BC11/BAZ1A/H2BC18/CENPX/MYC/CENPI/H2AX/H3C1/CHAF1B/H3C3/ASF1B/H2BC17/H3C13/SOX9/HELLS/H2BC3/H2BC1/H2BC14/TCF4	43
1260	downregulated.??-T3 vs VC	Downregulated	??-T3 vs VC	BP	GO:0031497	Chromatin assembly	39/1437	205/18800	9.48667e-08	3.09734e-06	2.21298e-06	MCM2/EZH2/H2BC5/HDAC1/HMGB2/H3C10/H2BC13/H3C2/CDAN1/NDN/H2BC6/H3C15/H3C14/H3-3A/H2BC21/H4C14/H4C2/NASP/H4C15/H2BC11/BEND3/BAZ1A/H2BC18/H2AX/HMGA2/H3C1/CHAF1B/H3C3/TET1/ASF1B/H2BC17/H3C13/SOX9/HELLS/SAMD1/H2BC3/CDK2/H2BC1/H2BC14	39
1261	downregulated.??-T3 vs VC	Downregulated	??-T3 vs VC	BP	GO:0031346	Positive regulation of cell projection organization	55/1437	341/18800	9.92557e-08	3.22212e-06	2.30214e-06	ACTR3/EZH2/OBSL1/DBN1/TENM3/ROR1/EPHB2/FNBP1L/FLNA/SKIL/CORO1C/CARMIL1/EFNA5/ITGA6/BAIAP2/EPS8/PLXNA2/PLXNB1/CAPRIN2/PLXNA1/SRF/NIN/PLCE1/SCN1B/IGF1R/ANLN/CCDC88A/PROM2/BMPR2/FZD1/CARMIL2/FSCN1/NEFL/AUTS2/EPS8L2/TOX/CDC42EP3/TGFB3/FZD4/AMIGO1/AGRN/PLXND1/SLIT2/PALM/LRRC7/DIXDC1/TENM2/WNT5A/F2RL1/TIAM2/PLXNA4/BDNF/SEMA7A/ENC1/WNT3	55
1262	downregulated.??-T3 vs VC	Downregulated	??-T3 vs VC	BP	GO:0035329	Hippo signaling	15/1437	40/18800	1.06665e-07	3.44299e-06	2.45994e-06	YAP1/LIMD1/TEAD1/WWTR1/CIT/AJUBA/NF2/WTIP/FAT4/MOB3B/TEAD4/AMOTL2/WWC1/SCHIP1/TEAD2	15
1263	downregulated.??-T3 vs VC	Downregulated	??-T3 vs VC	BP	GO:0014031	Mesenchymal cell development	23/1437	88/18800	1.1944e-07	3.8104e-06	2.72244e-06	CDH2/EFNB1/HIF1A/CORO1C/SMO/SEMA3F/NRP2/SEMA4F/NOTCH1/GBX2/HES1/CITED2/SOX9/FOXC2/KITLG/LAMA5/SEMA3C/SEMA7A/PITX2/NRG1/SNAI2/BMP4/EDN1	23
1264	downregulated.??-T3 vs VC	Downregulated	??-T3 vs VC	BP	GO:0048864	Stem cell development	23/1437	88/18800	1.1944e-07	3.8104e-06	2.72244e-06	CDH2/EFNB1/HIF1A/CORO1C/SMO/SEMA3F/NRP2/SEMA4F/GBX2/HES1/CITED2/SOX9/FOXC2/KITLG/LAMA5/SEMA3C/WNT7A/SEMA7A/PITX2/NRG1/SNAI2/BMP4/EDN1	23
1265	downregulated.??-T3 vs VC	Downregulated	??-T3 vs VC	BP	GO:0035148	Tube formation	32/1437	152/18800	1.2006e-07	3.8104e-06	2.72244e-06	VASP/HIF1A/DLC1/SCRIB/SIX1/SUFU/SFRP1/IRX3/TGFB1/LUZP1/RARG/NOTCH1/PTCH1/FZD1/FZD2/PIK3CD/ADM/PODXL/CITED2/SOX9/EGF/FGFR2/TEAD2/WNT5A/NFIB/PRICKLE1/TGM2/SHROOM3/TGFB2/SOX4/BMP4/ATOH8	32
1266	downregulated.??-T3 vs VC	Downregulated	??-T3 vs VC	BP	GO:0014033	Neural crest cell differentiation	24/1437	95/18800	1.28517e-07	4.05615e-06	2.89803e-06	CDH2/EFNB1/HIF1A/CORO1C/SMO/SEMA3F/SIX1/NRP2/SEMA4F/SFRP1/GBX2/HES1/CITED2/SOX9/FOXC2/KITLG/LAMA5/SEMA3C/SEMA7A/PITX2/NRG1/SNAI2/BMP4/EDN1	24
1267	downregulated.??-T3 vs VC	Downregulated	??-T3 vs VC	BP	GO:0071900	Regulation of protein serine/threonine kinase activity	58/1437	372/18800	1.48594e-07	4.66388e-06	3.33224e-06	CCNB1/EZH2/INCENP/RALB/TLR4/KAT2B/CALM2/CDKN2A/ERBB2/PSRC1/TRIB1/FZD8/LRP5/AJUBA/ZNF675/CALM3/SFRP1/TGFB1/CDC25A/PLK1/NEK10/FERMT2/PDE5A/CDKN2B/CDKN3/PDGFA/BMPR2/PKMYT1/CCNA2/CDKN2C/SLC8A1/PRKAR2B/HMGA2/HYAL2/ACTB/FZD4/PDGFC/CD24/KITLG/CCNF/EGF/PDGFB/PKIA/SFN/PDGFRB/ATP2B4/WNT5A/NTF3/NR2F2/CCND1/THBS1/CCNE2/CAV1/PTPRJ/FGF1/ADRB2/BMP4/EDN1	58
1268	downregulated.??-T3 vs VC	Downregulated	??-T3 vs VC	BP	GO:0001942	Hair follicle development	23/1437	89/18800	1.49527e-07	4.66738e-06	3.33474e-06	HDAC1/HPSE/SMO/LRP4/SNAI1/PDGFA/NOTCH1/MSX2/ERCC2/SOX9/GLI2/FGFR2/ALX4/WNT5A/LAMA5/FST/TNFRSF19/SOX18/LGR5/LGR4/TGFB2/INHBA/KRT84	23
1269	downregulated.??-T3 vs VC	Downregulated	??-T3 vs VC	BP	GO:0048592	Eye morphogenesis	32/1437	154/18800	1.64963e-07	5.12105e-06	3.65888e-06	OBSL1/TENM3/EPHB2/EFEMP1/HIF1A/NECTIN3/FBN1/MFAP5/TBX2/LRP5/GDF11/GLI3/RARG/SHROOM2/WNT9A/COL5A1/BCAR3/EPHA2/NECTIN1/FAT1/CITED2/SOX9/LHX1/FOXF2/PAX6/COL8A1/WNT5A/RARB/ALDH1A3/PITX2/PRDM1/BMP4	32
1270	downregulated.??-T3 vs VC	Downregulated	??-T3 vs VC	BP	GO:0007431	Salivary gland development	14/1437	36/18800	1.66678e-07	5.14618e-06	3.67683e-06	TGFB1/PLXNA1/PDGFA/TGFB3/PLXND1/PAX6/FGFR2/NFIB/NKX3-1/TGM2/LAMA5/SEMA3C/SNAI2/TGFB2	14
1271	downregulated.??-T3 vs VC	Downregulated	??-T3 vs VC	BP	GO:0002011	Morphogenesis of an epithelial sheet	18/1437	58/18800	1.67643e-07	5.14798e-06	3.67812e-06	CD44/FLNA/AJUBA/MRTFA/ITGA5/FERMT2/SRF/ARHGAP24/DDR1/NOTCH1/COL5A1/HBEGF/CARMIL2/MSX2/PHLDB2/WNT5A/CCN1/WNT7A	18
1272	downregulated.??-T3 vs VC	Downregulated	??-T3 vs VC	BP	GO:0014032	Neural crest cell development	22/1437	83/18800	1.70994e-07	5.22267e-06	3.73148e-06	CDH2/EFNB1/HIF1A/CORO1C/SMO/SEMA3F/NRP2/SEMA4F/GBX2/HES1/CITED2/SOX9/FOXC2/KITLG/LAMA5/SEMA3C/SEMA7A/PITX2/NRG1/SNAI2/BMP4/EDN1	22
1273	downregulated.??-T3 vs VC	Downregulated	??-T3 vs VC	BP	GO:0030509	Bmp signaling pathway	33/1437	162/18800	1.73923e-07	5.28373e-06	3.77511e-06	ENG/SKIL/FBN1/NEO1/RGMB/SFRP1/TGFB1/CRIM1/FOXD1/NOTCH1/BMPR2/SMURF2/FZD1/HES1/MSX2/DLX1/HOXA13/RUNX2/TGFB3/BAMBI/FSTL1/SMAD3/TGFBR3/WNT5A/CCN1/FST/SMAD7/BMPER/SMAD9/SMAD6/TGFB2/BMP4/DLX5	33
1274	downregulated.??-T3 vs VC	Downregulated	??-T3 vs VC	BP	GO:0050679	Positive regulation of epithelial cell proliferation	39/1437	211/18800	2.09362e-07	6.32651e-06	4.52015e-06	YAP1/HMGB2/AKT3/HIF1A/LAMC1/ERBB2/SMO/TNFSF12/NRP2/SFRP1/HMGB1/ZNF703/MYC/NOTCH1/TCF7L2/BMPR2/PIK3CD/GLUL/JCAD/FZD7/SOX9/EGF/CCR3/PDGFB/FGFR2/WNT5A/APLN/CCND1/WNT7A/VEGFC/DLX6/CAV2/FGF1/ITGA4/BMP4/DLX5/FGFBP1/ID1/F3	39
1275	downregulated.??-T3 vs VC	Downregulated	??-T3 vs VC	BP	GO:0010718	Positive regulation of epithelial to mesenchymal transition	17/1437	53/18800	2.15538e-07	6.47869e-06	4.62888e-06	EZH2/ENG/WWTR1/SNAI1/TGFB1/ZNF703/FERMT2/NOTCH1/TCF7L2/AXIN2/TGFB3/BAMBI/GLIPR2/SMAD3/COL1A1/TGFB2/BMP4	17
1276	downregulated.??-T3 vs VC	Downregulated	??-T3 vs VC	BP	GO:1905330	Regulation of morphogenesis of an epithelium	19/1437	65/18800	2.20906e-07	6.60508e-06	4.71918e-06	TBX2/SMO/SIX1/GJA1/SFRP1/PDGFA/PIK3CD/ADAMTS12/SOX9/LHX1/EGF/SIX2/WNT5A/WNT5B/SNAI2/FGF1/NKD1/LGR4/BMP4	19
1277	downregulated.??-T3 vs VC	Downregulated	??-T3 vs VC	BP	GO:1902893	Regulation of mirna transcription	18/1437	59/18800	2.24111e-07	6.66585e-06	4.7626e-06	SMARCA4/MRTFB/TEAD1/HIF1A/SREBF2/MRTFA/TGFB1/SRF/MYC/SOX9/PDGFB/SMAD3/NFIB/APLN/SMAD6/TGFB2/BMP4/ATOH8	18
1278	downregulated.??-T3 vs VC	Downregulated	??-T3 vs VC	BP	GO:0072080	Nephron tubule development	23/1437	91/18800	2.31676e-07	6.85495e-06	4.89771e-06	YAP1/GREB1L/WWTR1/SMO/SIX1/IRX3/GLI3/CTNNBIP1/MYC/FOXD1/NOTCH1/PTCH1/HES1/CD24/SOX9/LHX1/SIX2/LAMA5/SALL1/FGF1/WNT7B/LGR4/BMP4	23
1279	downregulated.??-T3 vs VC	Downregulated	??-T3 vs VC	BP	GO:0007178	Transmembrane receptor protein serine/threonine kinase signaling pathway	57/1437	368/18800	2.379e-07	7.00264e-06	5.00323e-06	FUT8/RBM14/ENG/CHST11/SKIL/FBN1/WWTR1/NEO1/TGIF2/PXN/RGMB/ZYX/SFRP1/GDF11/TGFB1/C20orf27/CRIM1/ZNF703/FERMT2/FURIN/CDKN2B/PMEPA1/FOXD1/NOTCH1/BMPR2/SMURF2/FZD1/HES1/MSX2/DLX1/HOXA13/RUNX2/LTBP2/TGFB3/CITED2/BAMBI/FSTL1/SMAD3/TGFBR3/WNT5A/CCN1/FST/SMAD7/THBS1/BMPER/CAV1/CAV2/SMAD9/NREP/SMAD6/TGFB2/ITGB8/INHBA/BMP4/DLX5/ID1/ATOH8	57
1280	downregulated.??-T3 vs VC	Downregulated	??-T3 vs VC	BP	GO:0060349	Bone morphogenesis	24/1437	98/18800	2.41218e-07	7.0637e-06	5.04686e-06	COL13A1/COL27A1/LRP5/GLI3/CSGALNACT1/RARG/BMPR2/FOXN3/MSX2/AXIN2/RUNX2/PHOSPHO1/TGFB3/CITED2/SOX9/INSIG1/FGFR2/COL1A1/RARB/DHRS3/CYP26B1/FGFR3/BMP4/DLX5	24
1281	downregulated.??-T3 vs VC	Downregulated	??-T3 vs VC	BP	GO:0032535	Regulation of cellular component size	55/1437	351/18800	2.62983e-07	7.66157e-06	5.47402e-06	KCNMA1/TRIOBP/COTL1/DBN1/VASP/ARPC5/AKT3/SVIL/CARMIL1/ADD2/EFNA5/BAIAP2/EPS8/RIN3/SEMA3F/EVL/GSN/CIT/SPTAN1/KIRREL1/SLC12A9/SEMA4F/TMSB10/PRR16/FHOD3/SHANK3/SPTB/ARHGAP28/SRF/RARG/WDR1/BMPR2/TMOD2/CARMIL2/NEFL/RAB3B/PLEKHG2/CDC42EP3/SLIT2/EZR/KCNN4/DAAM2/LIMA1/WNT5A/F2RL1/SEMA3C/KANK1/PLXNA4/WNT7A/BDNF/SEMA7A/WNT3/IL7R/WNT7B/EDN1	55
1282	downregulated.??-T3 vs VC	Downregulated	??-T3 vs VC	BP	GO:0035272	Exocrine system development	16/1437	48/18800	2.68987e-07	7.7965e-06	5.57042e-06	TGFB1/PLXNA1/PDGFA/IGSF3/TGFB3/PLXND1/SOX9/PAX6/FGFR2/NFIB/NKX3-1/TGM2/LAMA5/SEMA3C/SNAI2/TGFB2	16
1283	downregulated.??-T3 vs VC	Downregulated	??-T3 vs VC	BP	GO:0055123	Digestive system development	30/1437	142/18800	2.72359e-07	7.81449e-06	5.58328e-06	YAP1/CLMP/HIF1A/CPS1/DACT1/TBX2/SMO/SFRP1/GLI3/NOTCH1/TYMS/PDGFRA/HES1/HOXA13/TGFB3/PDGFC/GLI2/FOXF2/SIX2/SMAD3/FGFR2/ALX4/WNT5A/RARB/SALL1/OXTR/PRDM1/LGR4/TGFB2/BMP4	30
1284	downregulated.??-T3 vs VC	Downregulated	??-T3 vs VC	BP	GO:0090090	Negative regulation of canonical wnt signaling pathway	30/1437	142/18800	2.72359e-07	7.81449e-06	5.58328e-06	CDH2/LIMD1/HDAC1/SOX13/PTPRU/TLE5/DACT1/WWTR1/KREMEN1/LRP4/SFRP1/TMEM64/GLI3/CTNNBIP1/TLE3/NOTCH1/TCF7L2/FZD1/AXIN2/RBMS3/TMEM131L/FZD4/SOX9/WNT5A/BICC1/PRICKLE1/TLE4/CAV1/SNAI2/NKD1	30
1285	downregulated.??-T3 vs VC	Downregulated	??-T3 vs VC	BP	GO:0022404	Molting cycle process	23/1437	92/18800	2.86786e-07	8.14615e-06	5.82024e-06	HDAC1/HPSE/SMO/LRP4/SNAI1/PDGFA/NOTCH1/MSX2/ERCC2/SOX9/GLI2/FGFR2/ALX4/WNT5A/LAMA5/FST/TNFRSF19/SOX18/LGR5/LGR4/TGFB2/INHBA/KRT84	23
1286	downregulated.??-T3 vs VC	Downregulated	??-T3 vs VC	BP	GO:0022405	Hair cycle process	23/1437	92/18800	2.86786e-07	8.14615e-06	5.82024e-06	HDAC1/HPSE/SMO/LRP4/SNAI1/PDGFA/NOTCH1/MSX2/ERCC2/SOX9/GLI2/FGFR2/ALX4/WNT5A/LAMA5/FST/TNFRSF19/SOX18/LGR5/LGR4/TGFB2/INHBA/KRT84	23
1287	downregulated.??-T3 vs VC	Downregulated	??-T3 vs VC	BP	GO:0061614	Mirna transcription	18/1437	60/18800	2.97431e-07	8.40648e-06	6.00624e-06	SMARCA4/MRTFB/TEAD1/HIF1A/SREBF2/MRTFA/TGFB1/SRF/MYC/SOX9/PDGFB/SMAD3/NFIB/APLN/SMAD6/TGFB2/BMP4/ATOH8	18
1288	downregulated.??-T3 vs VC	Downregulated	??-T3 vs VC	BP	GO:0048844	Artery morphogenesis	21/1437	79/18800	3.0778e-07	8.65592e-06	6.18446e-06	ENG/AKT3/TBX2/SIX1/SRF/NOTCH1/BMPR2/MYLK/HES1/HOXA13/CITED2/FOXC2/NOTCH3/PDGFRB/EFNB2/SMAD7/PRDM1/TGFB2/SOX4/BMP4/EDN1	21
1289	downregulated.??-T3 vs VC	Downregulated	??-T3 vs VC	BP	GO:0098773	Skin epidermis development	23/1437	93/18800	3.53742e-07	9.89954e-06	7.073e-06	HDAC1/HPSE/SMO/LRP4/SNAI1/PDGFA/NOTCH1/MSX2/ERCC2/SOX9/GLI2/FGFR2/ALX4/WNT5A/LAMA5/FST/TNFRSF19/SOX18/LGR5/LGR4/TGFB2/INHBA/KRT84	23
1290	downregulated.??-T3 vs VC	Downregulated	??-T3 vs VC	BP	GO:0032233	Positive regulation of actin filament bundle assembly	18/1437	61/18800	3.9199e-07	1.09161e-05	7.79934e-06	LIMCH1/CARMIL1/ROCK2/EVL/PXN/LPAR1/SFRP1/NF2/FERMT2/CCDC88A/TGFB3/SMAD3/S100A10/SYNPO/TPM1/SYNPO2L/CCN2/ID1	18
1291	downregulated.??-T3 vs VC	Downregulated	??-T3 vs VC	BP	GO:0007265	Ras protein signal transduction	54/1437	347/18800	4.21874e-07	1.16911e-05	8.353e-06	HACD3/RALBP1/EPHB2/RALB/RIPOR1/FOXM1/RRAS2/DLC1/IQSEC1/ROCK2/CTNNAL1/CDKN2A/CYTH3/EPS8/ITPKB/ABCA1/RAB15/DHCR24/LPAR1/MET/PSD3/STARD13/ARHGAP42/ARHGAP29/PLCE1/RAB30/ARHGAP24/NOTCH1/STMN1/CCNA2/AUTS2/RAP2B/EPS8L2/CSF1/CDC42EP3/KITLG/STARD8/DOK1/RHOB/PDGFRB/RAB9B/F2RL1/F2R/ARHGDIB/RHOJ/CDK2/KANK1/KSR2/KANK2/NRG1/SYNPO2L/LPAR4/PLK2/TGFB2	54
1292	downregulated.??-T3 vs VC	Downregulated	??-T3 vs VC	BP	GO:0070167	Regulation of biomineral tissue development	24/1437	101/18800	4.39652e-07	1.21246e-05	8.66275e-06	FBXO5/HIF1A/ROCK2/GJA1/SRGN/TGFB1/BCOR/NOTCH1/BMPR2/SLC8A1/GAS6/PHOSPHO1/TGFB3/SOX9/RFLNB/TENT5A/SMAD3/S1PR1/CCN1/FAM20C/ZNF664-RFLNA/ADRB2/ODAPH/BMP4	24
1293	downregulated.??-T3 vs VC	Downregulated	??-T3 vs VC	BP	GO:0044772	Mitotic cell cycle phase transition	64/1437	440/18800	4.49831e-07	1.23454e-05	8.82048e-06	TFDP1/CENPF/CLSPN/CCNB1/EZH2/ANXA1/DTL/NACC2/GTSE1/FOXM1/FBXO5/ATAD5/ZFP36L1/CALM2/CDKN2A/DACT1/EPS8/UBE2C/NEK6/CIT/XRCC3/NASP/CALM3/CTDSPL/RBL1/CDC25A/PLK1/POLE/CDKN2B/CDKN3/MYC/CDC25B/ANLN/CDC14A/KLF11/PKMYT1/FOXN3/ESPL1/CDK6/CCNA2/HECW2/CDKN2C/ZWINT/WEE1/HMGA2/NABP1/SPDL1/SKP2/ERCC2/CDK1/FHL1/RRM2/E2F1/CCNF/CDK15/PKIA/CDC7/CDK2/CCND1/KANK2/CCNE2/PLK2/LZTS1/INHBA	64
1294	downregulated.??-T3 vs VC	Downregulated	??-T3 vs VC	BP	GO:0060443	Mammary gland morphogenesis	15/1437	44/18800	4.55204e-07	1.24328e-05	8.88293e-06	CAPN1/SCRIB/TBX2/LRP5/GLI3/TBX3/DDR1/PTCH1/MSX2/EPHA2/CSF1/FGFR2/WNT5A/CAV1/BMP4	15
1295	downregulated.??-T3 vs VC	Downregulated	??-T3 vs VC	BP	GO:0060560	Developmental growth involved in morphogenesis	41/1437	234/18800	4.58816e-07	1.24715e-05	8.91058e-06	YAP1/ALCAM/DBN1/SLC9A6/NDN/EFNA5/TBX2/SEMA3F/SIX1/NRP2/SEMA4F/SFRP1/PLXNA1/SRF/RARG/NIN/DDR1/NOTCH1/BMPR2/AUTS2/CSF1/SOX9/VCL/SLIT2/LHX1/ST8SIA2/FGFR2/S1PR1/WNT5A/SEMA3C/PLXNA4/SALL1/BDNF/SEMA7A/WNT3/FGF1/WNT7B/NKD1/ITGA4/BMP4/EDN1	41
1296	downregulated.??-T3 vs VC	Downregulated	??-T3 vs VC	BP	GO:0010975	Regulation of neuron projection development	63/1437	431/18800	4.64299e-07	1.25604e-05	8.97412e-06	EZH2/CDH2/OBSL1/DBN1/TENM3/ROR1/EPHB2/NSMF/PTPN9/FLNA/SKIL/PTPRF/EFNA5/ITGA6/BAIAP2/NTNG1/PDLIM5/SEMA3F/KREMEN1/LRP4/FKBP4/PLXNA2/LPAR1/SEMA4F/PLXNB1/SFRP1/CAPRIN2/SHANK3/PLXNA1/STX1B/SRF/NIN/NCS1/SCN1B/IGF1R/CCDC88A/BMPR2/FZD1/HES1/HECW2/ZNF365/NEFL/SDC2/TOX/AMIGO1/PLXND1/MYLIP/SLIT2/LRRC7/DIXDC1/WNT5A/EFNB2/SEMA3C/TIAM2/KANK1/PLXNA4/WNT7A/BDNF/SEMA7A/ENC1/WNT3/LZTS1/ID1	63
1297	downregulated.??-T3 vs VC	Downregulated	??-T3 vs VC	BP	GO:0001704	Formation of primary germ layer	27/1437	123/18800	4.75942e-07	1.28143e-05	9.15556e-06	COL12A1/GJA1/ITGA5/SNAI1/ETS2/COL4A2/NF2/SRF/BMPR2/ITGA7/COL5A1/EPHA2/FZD7/HMGA2/COL7A1/FOXC2/LHX1/SIX2/SMAD3/FGFR2/COL8A1/WNT5A/WNT3/ITGA4/INHBA/BMP4/ATOH8	27
1298	downregulated.??-T3 vs VC	Downregulated	??-T3 vs VC	BP	GO:0035904	Aorta development	18/1437	62/18800	5.13156e-07	1.37511e-05	9.82488e-06	ENG/TBX2/SIX1/SUFU/NDST1/SRF/NOTCH1/MYLK/HES1/PLXND1/PDGFRB/NKX3-1/PRICKLE1/EFNB2/PRDM1/SMAD6/TGFB2/SOX4	18
1299	downregulated.??-T3 vs VC	Downregulated	??-T3 vs VC	BP	GO:0007162	Negative regulation of cell adhesion	49/1437	305/18800	5.5179e-07	1.4717e-05	1.0515e-05	PAWR/ANXA1/CBFB/EPHB2/AJAP1/SOCS5/DLC1/IL4R/CORO1C/EFNA5/CDKN2A/ERBB2/SCRIB/SOCS6/PLXNA2/PLXNB1/HMGB1/TGFB1/RUNX1/UBASH3B/GLI3/PLXNA1/PDCD1LG2/NF2/ZNF703/PDE5A/VSIR/ILDR2/NOTCH1/FZD7/ACTN4/PODXL/TMEM131L/ANGPT1/SPN/FZD4/PHLDB2/PLXND1/SERPINE1/TGFBI/ARHGDIB/KANK1/COL1A1/PLXNA4/SMAD7/THBS1/SNAI2/GBP1/BMP4	49
1300	downregulated.??-T3 vs VC	Downregulated	??-T3 vs VC	BP	GO:0001701	In utero embryonic development	58/1437	387/18800	5.75022e-07	1.52649e-05	1.09065e-05	YAP1/FUT8/CCNB1/MYO1E/DBN1/PLK4/MBNL1/ETNK2/HIF1A/CHST11/SKIL/CAPN2/CMTM3/ZFP36L1/SMO/GJA1/MYH9/NASP/SNAI1/GLI3/TBX3/BCOR/APBA1/FURIN/ADCY9/SRF/PLCD3/MYC/GINS1/NOTCH1/TM4SF1/PTCH1/PDGFRA/TBL1XR1/HES1/ADM/PLPP4/ANGPT1/TET1/ASF1B/HS6ST1/TEAD4/TGFB3/CITED2/ERCC2/RRM2/NXN/PDGFB/SOCS3/SMAD3/FGFR2/CCN1/E2F8/NR2F2/PRDM1/WNT7B/SOX18/EDN1	58
1301	downregulated.??-T3 vs VC	Downregulated	??-T3 vs VC	BP	GO:0010464	Regulation of mesenchymal cell proliferation	12/1437	29/18800	5.78405e-07	1.52833e-05	1.09196e-05	SMO/SIX1/LRP5/LMNA/CTNNBIP1/MYC/PDGFA/SOX9/FGFR2/WNT5A/NFIB/BMP4	12
1302	downregulated.??-T3 vs VC	Downregulated	??-T3 vs VC	BP	GO:0045926	Negative regulation of growth	42/1437	245/18800	6.12133e-07	1.60997e-05	1.15028e-05	G6PD/SMARCA4/HIF1A/CDKN2A/PSRC1/SEMA3F/GJA1/DCBLD2/MAPK11/SEMA4F/CRYAB/SFRP1/TGFB1/CAPRIN2/SOCS2/BMPR2/SH3BP4/GNG4/PTCH1/CDKN2C/CCDC85B/HYAL2/CITED2/FHL1/SLIT2/CDA/WWC1/SMAD3/WNT5A/PLAC8/SEMA3C/SEMA7A/WNT3/PTPRJ/ADRB2/FGFR3/NPPB/RGS4/NKD1/TGFB2/INHBA/BMP4	42
1303	downregulated.??-T3 vs VC	Downregulated	??-T3 vs VC	BP	GO:1902895	Positive regulation of mirna transcription	15/1437	45/18800	6.34753e-07	1.66177e-05	1.18729e-05	SMARCA4/MRTFB/TEAD1/HIF1A/SREBF2/MRTFA/TGFB1/SRF/MYC/PDGFB/SMAD3/APLN/SMAD6/TGFB2/ATOH8	15
1304	downregulated.??-T3 vs VC	Downregulated	??-T3 vs VC	BP	GO:0006260	Dna replication	46/1437	280/18800	6.39013e-07	1.66524e-05	1.18978e-05	MCM2/NUCKS1/PCNA/LPIN1/DTL/RBMS1/FBXO5/ATAD5/CDAN1/GMNN/RMI1/MMS22L/RAD51/MCM3/NASP/SLX4/DNA2/PRIM1/BAZ1A/CENPX/POLE/PTMS/GINS1/CCDC88A/TONSL/PCLAF/BCAR3/CCNA2/ZNF365/MCM5/CHAF1B/GINS2/CDK1/GLI2/RRM2/EGF/PIF1/JADE2/CDC7/MCM10/NFIB/E2F8/CDK2/CCNE2/ID3/FAM111B	46
1305	downregulated.??-T3 vs VC	Downregulated	??-T3 vs VC	BP	GO:0110149	Regulation of biomineralization	24/1437	103/18800	6.46036e-07	1.67586e-05	1.19736e-05	FBXO5/HIF1A/ROCK2/GJA1/SRGN/TGFB1/BCOR/NOTCH1/BMPR2/SLC8A1/GAS6/PHOSPHO1/TGFB3/SOX9/RFLNB/TENT5A/SMAD3/S1PR1/CCN1/FAM20C/ZNF664-RFLNA/ADRB2/ODAPH/BMP4	24
1306	downregulated.??-T3 vs VC	Downregulated	??-T3 vs VC	BP	GO:0045668	Negative regulation of osteoblast differentiation	16/1437	51/18800	6.8708e-07	1.7662e-05	1.26191e-05	LIMD1/LRP5/SUFU/SFRP1/CRIM1/TMEM64/NOTCH1/PTCH1/CDK6/AXIN2/BAMBI/SOX9/SMAD3/VEGFC/SMAD6/ID3	16
1307	downregulated.??-T3 vs VC	Downregulated	??-T3 vs VC	BP	GO:0051496	Positive regulation of stress fiber assembly	16/1437	51/18800	6.8708e-07	1.7662e-05	1.26191e-05	LIMCH1/CARMIL1/ROCK2/EVL/PXN/LPAR1/SFRP1/NF2/FERMT2/CCDC88A/TGFB3/SMAD3/S100A10/TPM1/SYNPO2L/CCN2	16
1308	downregulated.??-T3 vs VC	Downregulated	??-T3 vs VC	BP	GO:0061333	Renal tubule morphogenesis	20/1437	76/18800	6.98558e-07	1.78762e-05	1.27721e-05	GREB1L/SMO/SIX1/IRX3/GLI3/CTNNBIP1/MYC/FOXD1/PTCH1/HES1/SOX9/LHX1/SIX2/LAMA5/COL4A1/SALL1/FGF1/LGR5/LGR4/BMP4	20
1309	downregulated.??-T3 vs VC	Downregulated	??-T3 vs VC	BP	GO:0007416	Synapse assembly	34/1437	180/18800	7.35721e-07	1.87427e-05	1.33913e-05	CDH2/OBSL1/EPHB2/FARP1/LRFN3/ADD2/EFNA5/FLRT2/PDLIM5/SIX1/LRP4/PLXNB1/NLGN2/SHANK3/LRRC4B/FZD1/MDGA1/ZDHHC12/NECTIN1/LRFN4/AMIGO1/AGRN/PLXND1/KIRREL3/ST8SIA2/AMIGO2/WNT5A/EFNB2/WNT7A/BDNF/OXTR/NRG1/CBLN1/DRD1	34
1310	downregulated.??-T3 vs VC	Downregulated	??-T3 vs VC	BP	GO:0042475	Odontogenesis of dentin-containing tooth	22/1437	90/18800	7.84177e-07	1.9888e-05	1.42095e-05	HDAC1/SMO/TCIRG1/LRP4/GLI3/NF2/PDGFRA/MSX2/DLX1/ADM/ROGDI/RUNX2/NECTIN1/CSF1/GLI2/SERPINE1/LAMA5/FST/FAM20C/TNFRSF11B/ODAPH/BMP4	22
1311	downregulated.??-T3 vs VC	Downregulated	??-T3 vs VC	BP	GO:0043254	Regulation of protein-containing complex assembly	59/1437	401/18800	8.58793e-07	2.16836e-05	1.54924e-05	TRIOBP/COTL1/DBN1/VASP/FBLIM1/ARPC5/ZNF827/RALB/MAPK9/TLR4/SVIL/ASAP1/CARMIL1/ADD2/DACT1/SEPTIN8/BAIAP2/EPS8/PSRC1/ABCA1/H3-3A/EVL/HSPA8/GSN/SPTAN1/KIRREL1/FKBP4/AJUBA/TMSB10/CRYAB/HMGB1/THRA/TGFB1/MET/FHOD3/STX1A/SPTB/STX1B/ARHGAP28/CTNNBIP1/STXBP6/FERMT2/NIN/PMEPA1/TMOD2/STMN1/CARMIL2/PIEZO1/FSCN1/HES1/PLEKHG2/CDC42EP3/NAV3/SOX9/SLIT2/DAAM2/KANK1/NRG1/SMAD6	59
1312	downregulated.??-T3 vs VC	Downregulated	??-T3 vs VC	BP	GO:0061037	Negative regulation of cartilage development	12/1437	30/18800	8.97015e-07	2.25484e-05	1.61103e-05	EFEMP1/ADAMTS7/RARG/WNT9A/CCN4/ADAMTS12/SOX9/RFLNB/RARB/SNAI2/ZNF664-RFLNA/BMP4	12
1313	downregulated.??-T3 vs VC	Downregulated	??-T3 vs VC	BP	GO:0042733	Embryonic digit morphogenesis	17/1437	58/18800	9.12953e-07	2.27477e-05	1.62527e-05	HDAC1/MAP3K20/CHST11/TBX2/GJA1/LRP4/LRP5/GLI3/TBX3/NOTCH1/MSX2/HOXC11/ALX4/WNT5A/SALL1/WNT7A/BMP4	17
1314	downregulated.??-T3 vs VC	Downregulated	??-T3 vs VC	BP	GO:0090303	Positive regulation of wound healing	17/1437	58/18800	9.12953e-07	2.27477e-05	1.62527e-05	ANXA1/HPSE/CLDN4/FERMT2/MYLK/HBEGF/CCN4/ST3GAL4/FOXC2/TBXA2R/SERPINE1/F2R/ACTG1/KANK1/THBS1/PLPP3/F3	17
1315	downregulated.??-T3 vs VC	Downregulated	??-T3 vs VC	BP	GO:0045165	Cell fate commitment	44/1437	266/18800	9.19042e-07	2.27995e-05	1.62897e-05	TENM4/SOX13/TBX2/SMO/SIX1/SUFU/SFRP1/ETS2/GLI3/TBX3/NOTCH1/TCF7L2/WNT9A/PTCH1/PITX1/HES1/DLX1/FZD7/MITF/HOXA13/RUNX2/TOX/TEAD4/SPN/SOX9/GLI2/FOXC2/SIX2/PAX6/NOTCH3/FGFR2/WNT5A/NR2F2/WNT7A/WNT3/WNT5B/NRG1/PRDM1/WNT7B/CYP26B1/SOX18/BMP4/NTF4/EDN1	44
1316	downregulated.??-T3 vs VC	Downregulated	??-T3 vs VC	BP	GO:0030510	Regulation of bmp signaling pathway	24/1437	105/18800	9.38331e-07	2.31284e-05	1.65247e-05	ENG/SKIL/FBN1/NEO1/SFRP1/CRIM1/FOXD1/NOTCH1/BMPR2/SMURF2/FZD1/HES1/MSX2/DLX1/HOXA13/BAMBI/FSTL1/WNT5A/CCN1/FST/SMAD7/BMPER/SMAD6/BMP4	24
1317	downregulated.??-T3 vs VC	Downregulated	??-T3 vs VC	BP	GO:0007369	Gastrulation	35/1437	190/18800	9.40442e-07	2.31284e-05	1.65247e-05	COL12A1/TENM4/TGIF2/GJA1/LRP5/PHLDB1/ITGA5/SNAI1/SFRP1/ETS2/COL4A2/NF2/SRF/BMPR2/ITGA7/COL5A1/EPHA2/FZD7/HMGA2/PHLDB2/COL7A1/FOXC2/LHX1/SIX2/SMAD3/FGFR2/COL8A1/WNT5A/APLN/WNT3/WNT5B/ITGA4/INHBA/BMP4/ATOH8	35
1318	downregulated.??-T3 vs VC	Downregulated	??-T3 vs VC	BP	GO:0030178	Negative regulation of wnt signaling pathway	33/1437	174/18800	9.69199e-07	2.37329e-05	1.69566e-05	CDH2/LIMD1/HDAC1/SOX13/PTPRU/TLE5/DACT1/WWTR1/KREMEN1/LRP4/SFRP1/TMEM64/GLI3/CTNNBIP1/TLE3/NOTCH1/TCF7L2/FZD1/AXIN2/RBMS3/TMEM131L/FZD4/APCDD1L/SOX9/NXN/WNT5A/BICC1/PRICKLE1/ALPK2/TLE4/CAV1/SNAI2/NKD1	33
1319	downregulated.??-T3 vs VC	Downregulated	??-T3 vs VC	BP	GO:0051098	Regulation of binding	55/1437	366/18800	1.02856e-06	2.50783e-05	1.79179e-05	NIBAN2/NUCKS1/HMGB2/RALB/TLE5/CALM2/PTPRF/ADD2/GMNN/DACT1/SMO/ANXA2/ZNF675/CALM3/SUMO3/HMGB1/TGFB1/UBASH3B/CAPRIN2/MET/ZNF618/PLK1/ARHGAP28/CTNNBIP1/TRIM6/MYC/TCF7L2/STMN1/HES1/MSX2/HMGA2/ACTB/ANGPT1/BAMBI/ERCC2/PLXND1/PLCL2/E2F1/EGF/PDGFB/SPON1/PAX6/SMAD3/S100A10/PCSK9/TGFBR3/WNT5A/BCL3/BDNF/CAV1/ADRB2/ITGA4/LFNG/BMP4/ID1	55
1320	downregulated.??-T3 vs VC	Downregulated	??-T3 vs VC	BP	GO:0044344	Cellular response to fibroblast growth factor stimulus	25/1437	113/18800	1.07225e-06	2.6001e-05	1.85771e-05	CD44/ZFP36L1/CPS1/TBX2/FLRT2/GPC1/NDST1/SFRP1/MYC/HYAL2/RUNX2/LHX1/FGFR2/FGF5/WNT5A/APLN/COL1A1/FAM20C/THBS1/FGF1/CREB3L1/HHIP/FGFR3/CCN2/FGFBP1	25
1321	downregulated.??-T3 vs VC	Downregulated	??-T3 vs VC	BP	GO:0010463	Mesenchymal cell proliferation	14/1437	41/18800	1.07556e-06	2.6001e-05	1.85771e-05	TBX2/SMO/SIX1/LRP5/LMNA/CTNNBIP1/MYC/PDGFA/SOX9/SIX2/FGFR2/WNT5A/NFIB/BMP4	14
1322	downregulated.??-T3 vs VC	Downregulated	??-T3 vs VC	BP	GO:0008360	Regulation of cell shape	30/1437	151/18800	1.08504e-06	2.61192e-05	1.86616e-05	LIMD1/ANXA1/MYO10/PALM2AKAP2/FBLIM1/DLC1/BAIAP2/EPS8/MYH9/PLXNA2/STRIP2/LPAR1/PLXNB1/PLXNA1/FERMT2/WDR1/ITGA7/RHOBTB1/RHOBTB3/CDC42EP3/BAMBI/PLXND1/EZR/FAM171A1/RHOB/PALM/RHOJ/SHROOM3/PLXNA4/TPM1	30
[truncated: 3,209 more rows]
