# Supplementary material for: Transcriptomic Analysis of the Anticancer Effects of Annatto Tocotrienol, Delta-Tocotrienol and Gamma-Tocotrienol on Chondrosarcoma Cells
Source: Nutrients. 2022 Oct 13;14(20):4277. doi: 10.3390/nu14204277 (PMC9611384; doi:10.3390/nu14204277)
Supplement: Supplementary file 1 [file nutrients-14-04277-s001.zip › S6 - KEGG enriched pathway for tocotrienol treatments.xlsx]

## Sheet: result_table_enrichKEGG
	Cluster	group	legend	ID	Description	GeneRatio	BgRatio	pvalue	p.adjust	qvalue	geneID	Count
1	downregulated.Antt vs VC	Downregulated	Antt vs VC	hsa05322	Systemic lupus erythematosus	41/541	136/8163	3.17288e-17	9.64556e-15	6.94694e-15	H2AC6/H2AC21/H2BC12/ACTN1/H4C12/H2AC19/H4C3/H2BC5/H2AC18/H4C8/H2BC21/H4C11/H2AC13/H4C14/H3C10/H2BC6/H2AC20/H2BC13/H4C15/H3C15/ACTN4/H3C14/H3C2/H4C2/H2BC11/H2AX/H2BC18/H2AC11/H2AC15/H3C1/H2AC14/H3C3/H2AC16/H2BC17/H2AC12/GRIN2A/H2AC4/H2BC3/H2BC14/H2BC1/H2AC1	41
2	downregulated.Antt vs VC	Downregulated	Antt vs VC	hsa05034	Alcoholism	48/541	187/8163	8.00308e-17	1.21647e-14	8.76127e-15	H2AC6/CALM3/H2AC21/H2BC12/H4C12/H2AC19/H4C3/H2BC5/H2AC18/H4C8/H2BC21/H4C11/H2AC13/H4C14/H3C10/H2BC6/H2AC20/GNAI1/H2BC13/H4C15/H3C15/GNG2/H3C14/H3C2/SLC29A1/H4C2/GRIN2D/CAMK4/H2BC11/H2AX/H2BC18/H2AC11/H2AC15/H3C1/H2AC14/H3C3/BDNF/CAMKK1/H2AC16/H2BC17/H2AC12/GRIN2A/CREB3L1/H2AC4/H2BC3/H2BC14/H2BC1/H2AC1	48
3	downregulated.Antt vs VC	Downregulated	Antt vs VC	hsa04613	Neutrophil extracellular trap formation	47/541	190/8163	8.18759e-16	8.29676e-14	5.97551e-14	H2AC6/H2AC21/H2BC12/PLCB3/H4C12/MAPK12/HMGB1/H2AC19/H4C3/H2BC5/H2AC18/H4C8/H2BC21/H4C11/H2AC13/H4C14/SELPLG/H3C10/PIK3CD/H2BC6/ACTB/H2AC20/H2BC13/H4C15/H3C15/H3C14/H3C2/H4C2/H2BC11/H2AX/H2BC18/H2AC11/PLCB4/PIK3R3/H2AC15/ACTG1/H3C1/H2AC14/H3C3/H2AC16/H2BC17/H2AC12/H2AC4/H2BC3/H2BC14/H2BC1/H2AC1	47
4	downregulated.Antt vs VC	Downregulated	Antt vs VC	hsa04110	Cell cycle	37/541	126/8163	3.03089e-15	2.30348e-13	1.65902e-13	PCNA/CCNB2/CDKN2B/BUB1B/GADD45B/MCM3/MCM2/TFDP2/TGFB1/CCNB1/CDC25C/RBL1/CDK6/CDC20/CDKN2C/PTTG1/SMAD3/SKP2/CDC14A/ESPL1/CDC25A/CDC25B/CCND1/TGFB3/CCNA2/MCM5/CDK1/WEE1/PLK1/CDC7/SFN/PKMYT1/CDK2/E2F1/E2F2/CCNE2/TGFB2	37
5	downregulated.Antt vs VC	Downregulated	Antt vs VC	hsa04390	Hippo signaling pathway	35/541	157/8163	1.07289e-10	6.52317e-09	4.69813e-09	TEAD1/PPP2R1B/AJUBA/TGFB1/FZD7/NF2/BMPR2/FZD4/SMAD3/ACTB/WTIP/GLI2/FZD2/SNAI2/CCND1/WNT7A/TGFB3/WNT7B/SERPINE1/AXIN2/TEAD4/FRMD6/ACTG1/TCF7L1/WWC1/ID1/WNT5B/PPP2R2B/TEAD2/CCN2/FGF1/NKD1/WNT3/TGFB2/BMP4	35
6	downregulated.Antt vs VC	Downregulated	Antt vs VC	hsa05203	Viral carcinogenesis	40/541	204/8163	3.16126e-10	1.6017e-08	1.15358e-08	PKM/CDKN2B/TRAF2/PXN/H2BC12/KAT2B/STAT5B/GSN/ACTN1/H4C12/H4C3/RBL1/H2BC5/SRF/H4C8/H2BC21/CDK6/CDC20/H4C11/H4C14/PIK3CD/SKP2/H2BC6/H2BC13/H4C15/ACTN4/H4C2/CCND1/H2BC11/CCNA2/CDK1/H2BC18/PIK3R3/CDK2/H2BC17/CREB3L1/CCNE2/H2BC3/H2BC14/H2BC1	40
7	downregulated.Antt vs VC	Downregulated	Antt vs VC	hsa04015	Rap1 signaling pathway	37/541	210/8163	3.08903e-08	1.34152e-06	9.66192e-07	RALB/SIPA1L2/LPAR1/CALM3/VASP/IGF1R/PLCB3/ADCY9/BCAR1/MAPK12/PDGFA/EPHA2/ENAH/ADCY3/PLCE1/PIK3CD/ACTB/PDGFB/GNAI1/EGF/MAGI3/PDGFC/VEGFC/FGF5/PLCB4/PIK3R3/F2R/ACTG1/KITLG/PDGFRB/ID1/FGFR2/THBS1/FGF1/FGFR3/GRIN2A/LPAR4	37
8	downregulated.Antt vs VC	Downregulated	Antt vs VC	hsa04218	Cellular senescence	30/541	156/8163	8.73921e-08	3.3209e-06	2.39178e-06	CAPN1/CCNB2/CDKN2B/CAPN2/CALM3/GADD45B/TGFB1/MAPK12/CCNB1/FOXM1/MCU/RRAS2/RBL1/CDK6/IGFBP3/PIK3CD/SMAD3/MYBL2/CDC25A/CCND1/TGFB3/CCNA2/SERPINE1/CDK1/PIK3R3/CDK2/E2F1/E2F2/CCNE2/TGFB2	30
9	downregulated.Antt vs VC	Downregulated	Antt vs VC	hsa05226	Gastric cancer	28/541	149/8163	3.90335e-07	1.25683e-05	9.05196e-06	CDKN2B/RXRA/GADD45B/DDB2/TGFB1/FZD7/FZD4/PIK3CD/SMAD3/EGF/FZD2/CCND1/WNT7A/TGFB3/WNT7B/AXIN2/FGF5/PIK3R3/TCF7L1/WNT5B/CDK2/FGFR2/E2F1/E2F2/FGF1/CCNE2/WNT3/TGFB2	28
10	downregulated.Antt vs VC	Downregulated	Antt vs VC	hsa05217	Basal cell carcinoma	17/541	63/8163	4.13431e-07	1.25683e-05	9.05196e-06	GADD45B/DDB2/SUFU/PTCH1/FZD7/GLI3/FZD4/GLI2/FZD2/WNT7A/WNT7B/AXIN2/TCF7L1/WNT5B/WNT3/HHIP/BMP4	17
11	downregulated.Antt vs VC	Downregulated	Antt vs VC	hsa04350	TGF-beta signaling pathway	21/541	94/8163	5.95768e-07	1.64649e-05	1.18583e-05	CDKN2B/PPP2R1B/RGMB/TGFB1/TGIF2/RBL1/SMURF2/BMPR2/SMAD3/BAMBI/TGFB3/SMAD9/PITX2/SMAD6/ID3/ID1/FST/THBS1/INHBA/TGFB2/BMP4	21
12	downregulated.Antt vs VC	Downregulated	Antt vs VC	hsa04115	p53 signaling pathway	18/541	73/8163	8.18507e-07	2.07355e-05	1.49342e-05	CCNB2/GADD45B/DDB2/TP53I3/FAS/CCNB1/CDK6/GTSE1/SESN3/IGFBP3/CCND1/RRM2/SERPINE1/CDK1/SFN/CDK2/THBS1/CCNE2	18
13	downregulated.Antt vs VC	Downregulated	Antt vs VC	hsa05205	Proteoglycans in cancer	33/541	205/8163	1.48984e-06	3.48393e-05	2.5092e-05	CD44/PXN/ROCK2/SDC1/IGF1R/TIMP3/HIF1A/PTCH1/TGFB1/MAPK12/FZD7/FAS/HBEGF/RRAS2/SDC2/FZD4/PLCE1/PIK3CD/ACTB/FZD2/CCND1/WNT7A/WNT7B/ANK1/PIK3R3/ACTG1/EZR/WNT5B/CAV2/THBS1/CAV1/WNT3/TGFB2	33
14	downregulated.Antt vs VC	Downregulated	Antt vs VC	hsa04810	Regulation of actin cytoskeleton	34/541	218/8163	2.16166e-06	4.6939e-05	3.38065e-05	ACTR3/LPAR1/PXN/ROCK2/GSN/BCAR1/ACTN1/MYH9/IQGAP3/PDGFA/ENAH/BAIAP2/RRAS2/MYLK/ITGA7/PIK3CD/ACTB/PDGFB/LIMK2/EGF/ACTN4/PDGFC/VCL/FGF5/PIK3R3/F2R/ACTG1/PDGFRB/EZR/FGFR2/ITGB8/FGF1/FGFR3/LPAR4	34
15	downregulated.Antt vs VC	Downregulated	Antt vs VC	hsa05218	Melanoma	17/541	72/8163	3.15947e-06	6.40319e-05	4.61172e-05	GADD45B/IGF1R/DDB2/PDGFA/CDK6/PIK3CD/MITF/PDGFB/EGF/CCND1/PDGFC/FGF5/PIK3R3/PDGFRB/E2F1/E2F2/FGF1	17
16	downregulated.Antt vs VC	Downregulated	Antt vs VC	hsa04068	FoxO signaling pathway	23/541	131/8163	1.39291e-05	0.000252708	0.000182006	CCNB2/CDKN2B/GADD45B/IGF1R/TGFB1/MAPK12/CCNB1/SGK1/PLK4/PIK3CD/SMAD3/SKP2/EGF/CCND1/TGFB3/PIK3R3/PLK1/CDK2/IRS1/S1PR1/PLK2/IL7R/TGFB2	23
17	downregulated.Antt vs VC	Downregulated	Antt vs VC	hsa04540	Gap junction	18/541	88/8163	1.41317e-05	0.000252708	0.000182006	TUBA4A/LPAR1/TUBB/PLCB3/ADCY9/PDGFA/ADCY3/TUBA1C/TUBB6/TUBA1A/PDGFB/GNAI1/EGF/TUBB3/PDGFC/CDK1/PLCB4/PDGFRB	18
18	downregulated.Antt vs VC	Downregulated	Antt vs VC	hsa04310	Wnt signaling pathway	27/541	170/8163	1.73495e-05	0.000293013	0.000211034	ROCK2/PLCB3/FZD7/TBL1XR1/FZD4/TLE3/SMAD3/BAMBI/APCDD1L/VANGL1/FZD2/DAAM2/CCND1/WNT7A/WNT7B/AXIN2/PLCB4/PRICKLE1/PRICKLE2/TCF7L1/WNT5B/TLE4/CTNND2/NKD1/WNT3/LGR4/LGR5	27
19	downregulated.Antt vs VC	Downregulated	Antt vs VC	hsa04510	Focal adhesion	30/541	201/8163	2.08627e-05	0.000331965	0.000239088	CAPN2/PXN/ROCK2/VASP/IGF1R/BCAR1/ACTN1/PDGFA/ZYX/MYLK/ITGA7/PIK3CD/COL4A5/ACTB/PDGFB/EGF/ACTN4/COL4A1/LAMA5/CCND1/PDGFC/VEGFC/VCL/PIK3R3/ACTG1/PDGFRB/CAV2/THBS1/ITGB8/CAV1	30
20	downregulated.Antt vs VC	Downregulated	Antt vs VC	hsa00100	Steroid biosynthesis	8/541	20/8163	2.18398e-05	0.000331965	0.000239088	NSDHL/LBR/DHCR24/LSS/CYP51A1/EBP/FDFT1/MSMO1	8
21	downregulated.Antt vs VC	Downregulated	Antt vs VC	hsa04933	AGE-RAGE signaling pathway in diabetic complications	19/541	100/8163	2.48041e-05	0.000359069	0.00025861	STAT5B/PLCB3/TGFB1/MAPK12/PLCE1/PLCD3/PIK3CD/SMAD3/COL4A5/COL4A1/CCND1/TGFB3/VEGFC/SERPINE1/PLCB4/PIK3R3/TGFB2/F3/EDN1	19
22	downregulated.Antt vs VC	Downregulated	Antt vs VC	hsa04934	Cushing syndrome	25/541	155/8163	2.71243e-05	0.000374809	0.000269945	CDKN2B/LDLR/CACNA1C/PLCB3/ADCY9/FZD7/ADCY3/FZD4/CDK6/CDKN2C/GNAI1/FZD2/CCND1/WNT7A/WNT7B/AXIN2/PLCB4/TCF7L1/WNT5B/CDK2/E2F1/E2F2/CREB3L1/CCNE2/WNT3	25
23	downregulated.Antt vs VC	Downregulated	Antt vs VC	hsa05212	Pancreatic cancer	16/541	76/8163	2.89764e-05	0.000382993	0.00027584	RALB/GADD45B/DDB2/TGFB1/PLD2/CDK6/PIK3CD/SMAD3/EGF/CCND1/RAD51/TGFB3/PIK3R3/E2F1/E2F2/TGFB2	16
24	downregulated.Antt vs VC	Downregulated	Antt vs VC	hsa05225	Hepatocellular carcinoma	26/541	168/8163	3.93009e-05	0.000497812	0.000358535	GADD45B/IGF1R/DDB2/TGFB1/FZD7/FZD4/DPF1/CDK6/PIK3CD/SMAD3/ACTB/FZD2/CCND1/WNT7A/TGFB3/WNT7B/AXIN2/PIK3R3/ACTG1/GSTA4/TCF7L1/WNT5B/E2F1/E2F2/WNT3/TGFB2	26
25	downregulated.Antt vs VC	Downregulated	Antt vs VC	hsa04020	Calcium signaling pathway	33/541	240/8163	4.53062e-05	0.000550924	0.000396787	CALM3/CACNA1C/ITPKB/PLCB3/ADCY9/PDGFA/MCU/ADCY3/MYLK/PLCE1/PLCD3/PDGFB/EGF/TBXA2R/GRIN2D/CAMK4/PTGFR/SLC8A1/PDGFC/ATP2B4/VEGFC/FGF5/PLCB4/PDE1C/F2R/PDGFRB/ADRA1D/FGFR2/ADRB2/FGF1/FGFR3/GRIN2A/OXTR	33
26	downregulated.Antt vs VC	Downregulated	Antt vs VC	hsa05414	Dilated cardiomyopathy	18/541	96/8163	4.85853e-05	0.000568075	0.00040914	TPM4/CACNA1C/ADCY9/TGFB1/DMD/ADCY3/CACNB3/ITGA7/LMNA/ACTB/SLC8A1/TGFB3/ACTG1/TPM2/DES/TPM1/ITGB8/TGFB2	18
27	downregulated.Antt vs VC	Downregulated	Antt vs VC	hsa05215	Prostate cancer	18/541	97/8163	5.60601e-05	0.000631195	0.000454601	IGF1R/PDGFA/PIK3CD/PDGFB/EGF/CCND1/PLAT/PDGFC/PIK3R3/PDGFRB/NKX3-1/TCF7L1/CDK2/FGFR2/E2F1/E2F2/CREB3L1/CCNE2	18
28	downregulated.Antt vs VC	Downregulated	Antt vs VC	hsa04550	Signaling pathways regulating pluripotency of stem cells	23/541	143/8163	5.91876e-05	0.000642609	0.000462821	IGF1R/MAPK12/FZD7/BMPR2/FZD4/LIFR/PIK3CD/SMAD3/FZD2/WNT7A/SMAD9/WNT7B/AXIN2/ID3/PIK3R3/ID1/WNT5B/FGFR2/FGFR3/INHBA/WNT3/DLX5/BMP4	23
29	downregulated.Antt vs VC	Downregulated	Antt vs VC	hsa04151	PI3K-Akt signaling pathway	43/541	354/8163	7.03055e-05	0.000721169	0.000519401	LPAR1/RXRA/PPP2R1B/IGF1R/PHLPP1/PHLPP2/PDGFA/EPHA2/SGK1/ITGA7/CDK6/PIK3CD/PPP2R5D/COL4A5/PDGFB/EGF/GNG2/COL4A1/PKN3/LAMA5/CCND1/PDGFC/VEGFC/FGF5/PIK3R3/F2R/KITLG/PDGFRB/BDNF/NTF3/CDK2/FGFR2/PPP2R2B/IRS1/THBS1/NTF4/ITGB8/FGF1/FGFR3/CREB3L1/CCNE2/IL7R/LPAR4	43
30	downregulated.Antt vs VC	Downregulated	Antt vs VC	hsa05410	Hypertrophic cardiomyopathy	17/541	90/8163	7.1168e-05	0.000721169	0.000519401	TPM4/CACNA1C/TGFB1/DMD/CACNB3/ITGA7/LMNA/ACTB/SLC8A1/TGFB3/ACTG1/TPM2/DES/TPM1/ITGB8/TGFB2/EDN1	17
31	downregulated.Antt vs VC	Downregulated	Antt vs VC	hsa05224	Breast cancer	23/541	147/8163	9.1719e-05	0.00086863	0.000625606	GADD45B/IGF1R/DDB2/FZD7/NOTCH1/FZD4/NOTCH3/CDK6/PIK3CD/EGF/FZD2/CCND1/WNT7A/WNT7B/AXIN2/FGF5/PIK3R3/TCF7L1/WNT5B/E2F1/E2F2/FGF1/WNT3	23
32	downregulated.Antt vs VC	Downregulated	Antt vs VC	hsa05222	Small cell lung cancer	17/541	92/8163	9.48367e-05	0.00086863	0.000625606	CDKN2B/RXRA/TRAF2/GADD45B/DDB2/CDK6/PIK3CD/SKP2/COL4A5/COL4A1/LAMA5/CCND1/PIK3R3/CDK2/E2F1/E2F2/CCNE2	17
33	downregulated.Antt vs VC	Downregulated	Antt vs VC	hsa05214	Glioma	15/541	75/8163	9.56591e-05	0.00086863	0.000625606	CALM3/GADD45B/IGF1R/DDB2/PDGFA/CDK6/PIK3CD/PDGFB/EGF/CCND1/CAMK4/PIK3R3/PDGFRB/E2F1/E2F2	15
34	downregulated.Antt vs VC	Downregulated	Antt vs VC	hsa04916	Melanogenesis	18/541	101/8163	9.71494e-05	0.00086863	0.000625606	CALM3/PLCB3/ADCY9/FZD7/ADCY3/FZD4/MITF/GNAI1/FZD2/WNT7A/WNT7B/PLCB4/KITLG/TCF7L1/WNT5B/CREB3L1/WNT3/EDN1	18
35	downregulated.Antt vs VC	Downregulated	Antt vs VC	hsa04914	Progesterone-mediated oocyte maturation	18/541	102/8163	0.000110865	0.000962938	0.000693528	CCNB2/IGF1R/ADCY9/MAPK12/CCNB1/CDC25C/ADCY3/PIK3CD/GNAI1/CDC25A/RPS6KA1/CDC25B/CCNA2/CDK1/PIK3R3/PLK1/PKMYT1/CDK2	18
36	downregulated.Antt vs VC	Downregulated	Antt vs VC	hsa04024	cAMP signaling pathway	30/541	221/8163	0.000126759	0.00107041	0.000770934	ROCK2/CALM3/CACNA1C/ADCY9/PTCH1/PLD2/ADCY3/RRAS2/HCN4/SOX9/ATP1B1/GLI3/PLCE1/SSTR2/PIK3CD/GNAI1/GRIN2D/CAMK4/ATP2B4/PIK3R3/F2R/ADCYAP1/ADORA1/BDNF/ADRB2/GRIN2A/CREB3L1/OXTR/HHIP/EDN1	30
37	downregulated.Antt vs VC	Downregulated	Antt vs VC	hsa05165	Human papillomavirus infection	40/541	331/8163	0.000140966	0.00115821	0.000834164	PKM/PXN/PPP2R1B/FZD7/FAS/TCIRG1/NOTCH1/RBL1/HES4/FZD4/NOTCH3/ITGA7/CDK6/MAML2/PIK3CD/PPP2R5D/COL4A5/HES6/EGF/COL4A1/FZD2/LAMA5/CCND1/WNT7A/WNT7B/CCNA2/AXIN2/PIK3R3/PDGFRB/TCF7L1/WNT5B/CDK2/PPP2R2B/E2F1/THBS1/ITGB8/CREB3L1/CCNE2/WNT3/LFNG	40
38	downregulated.Antt vs VC	Downregulated	Antt vs VC	hsa04010	MAPK signaling pathway	36/541	294/8163	0.000233555	0.00186844	0.00134569	MAP3K20/TRAF2/GADD45B/CACNA1C/IGF1R/MAP3K1/RPS6KA4/TGFB1/MAPK12/PDGFA/FAS/EPHA2/MAP3K14/RRAS2/SRF/CACNB3/MECOM/HSPB1/PDGFB/EGF/RPS6KA1/CDC25B/STMN1/TGFB3/PDGFC/VEGFC/FGF5/KITLG/PDGFRB/BDNF/NTF3/FGFR2/NTF4/FGF1/FGFR3/TGFB2	36
39	downregulated.Antt vs VC	Downregulated	Antt vs VC	hsa04072	Phospholipase D signaling pathway	22/541	148/8163	0.000276624	0.00215625	0.00155298	RALB/DGKH/LPAR1/PLCB3/ADCY9/PLD2/PDGFA/CYTH3/ADCY3/RRAS2/PIK3CD/PDGFB/EGF/PTGFR/PDGFC/PLCB4/PIK3R3/F2R/KITLG/PDGFRB/PLPP3/LPAR4	22
40	downregulated.Antt vs VC	Downregulated	Antt vs VC	hsa05166	Human T-cell leukemia virus 1 infection	29/541	222/8163	0.000319206	0.00242596	0.00174723	CCNB2/CDKN2B/BUB1B/KAT2B/STAT5B/ADCY9/MAP3K1/TGFB1/MAP3K14/ADCY3/SRF/CDC20/CDKN2C/PTTG1/PIK3CD/SMAD3/ETS2/ESPL1/CCND1/TGFB3/MSX2/CCNA2/PIK3R3/CDK2/E2F1/E2F2/CREB3L1/CCNE2/TGFB2	29
41	downregulated.Antt vs VC	Downregulated	Antt vs VC	hsa04114	Oocyte meiosis	20/541	131/8163	0.000362733	0.00268953	0.00193706	CCNB2/CALM3/PPP2R1B/IGF1R/ADCY9/MAPK12/CCNB1/CDC25C/ADCY3/CDC20/PTTG1/PPP2R5D/FBXO5/ESPL1/RPS6KA1/CDK1/PLK1/PKMYT1/CDK2/CCNE2	20
42	downregulated.Antt vs VC	Downregulated	Antt vs VC	hsa05220	Chronic myeloid leukemia	14/541	76/8163	0.000400436	0.0028984	0.00208749	GADD45B/STAT5B/DDB2/TGFB1/CDK6/MECOM/PIK3CD/SMAD3/CCND1/TGFB3/PIK3R3/E2F1/E2F2/TGFB2	14
43	downregulated.Antt vs VC	Downregulated	Antt vs VC	hsa04392	Hippo signaling pathway - multiple species	8/541	29/8163	0.000437032	0.00308972	0.00222528	TEAD1/AJUBA/NF2/WTIP/TEAD4/FRMD6/WWC1/TEAD2	8
44	downregulated.Antt vs VC	Downregulated	Antt vs VC	hsa04520	Adherens junction	13/541	71/8163	0.000679796	0.00469677	0.00338272	IGF1R/ACTN1/BAIAP2/NECTIN1/SMAD3/ACTB/ACTN4/SNAI2/VCL/ACTG1/PTPRJ/TCF7L1/LMO7	13
45	downregulated.Antt vs VC	Downregulated	Antt vs VC	hsa04261	Adrenergic signaling in cardiomyocytes	21/541	150/8163	0.000851813	0.00575447	0.0041445	TPM4/CALM3/PPP2R1B/CACNA1C/PLCB3/ADCY9/MAPK12/ADCY3/ATP1B1/CACNB3/PPP2R5D/GNAI1/SLC8A1/ATP2B4/PLCB4/TPM2/ADRA1D/PPP2R2B/ADRB2/TPM1/CREB3L1	21
46	downregulated.Antt vs VC	Downregulated	Antt vs VC	hsa04935	Growth hormone synthesis, secretion and action	18/541	120/8163	0.000871602	0.00576015	0.00414859	CACNA1C/STAT5B/PLCB3/ADCY9/MAP3K1/BCAR1/MAPK12/ADCY3/SOCS3/SOCS2/SSTR2/IGFBP3/PIK3CD/GNAI1/PLCB4/PIK3R3/IRS1/CREB3L1	18
47	downregulated.Antt vs VC	Downregulated	Antt vs VC	hsa04919	Thyroid hormone signaling pathway	18/541	121/8163	0.000962536	0.00622576	0.00448393	RXRA/KAT2B/PLCB3/HIF1A/NOTCH1/ATP1B1/NOTCH3/THRA/PLCE1/PLCD3/PIK3CD/ACTB/CCND1/PLCB4/PIK3R3/ACTG1/DIO2/BMP4	18
48	downregulated.Antt vs VC	Downregulated	Antt vs VC	hsa04022	cGMP-PKG signaling pathway	22/541	167/8163	0.0014683	0.00929925	0.00669752	KCNMA1/ROCK2/CALM3/CACNA1C/VASP/PLCB3/ADCY9/ADCY3/ATP1B1/SRF/MYLK/KCNMB1/GNAI1/SLC8A1/ATP2B4/PLCB4/ADORA1/ADRA1D/ADRB2/NPPB/IRS1/CREB3L1	22
49	downregulated.Antt vs VC	Downregulated	Antt vs VC	hsa04530	Tight junction	22/541	169/8163	0.00171526	0.0104586	0.00753249	ACTR3/PCNA/TUBA4A/ROCK2/PPP2R1B/VASP/MAP3K1/ACTN1/MYH9/MPP4/NF2/TUBA1C/TUBA1A/AMOTL2/ACTB/ACTN4/CCND1/CGNL1/SYNPO/ACTG1/EZR/PPP2R2B	22
50	downregulated.Antt vs VC	Downregulated	Antt vs VC	hsa04014	Ras signaling pathway	28/541	235/8163	0.00172016	0.0104586	0.00753249	RALB/CALM3/IGF1R/PLD2/PDGFA/EPHA2/RRAS2/RIN1/PLCE1/PIK3CD/ETS2/PDGFB/EGF/GNG2/PDGFC/VEGFC/FGF5/PIK3R3/KITLG/PDGFRB/BDNF/NTF3/KSR2/FGFR2/NTF4/FGF1/FGFR3/GRIN2A	28
51	downregulated.Antt vs VC	Downregulated	Antt vs VC	hsa05131	Shigellosis	29/541	247/8163	0.00179803	0.0105591	0.00760489	ACTR3/CD44/CAPN1/CAPN2/TRAF2/PXN/ROCK2/FNBP1L/PLCB3/BCAR1/ACTN1/MAPK12/CYTH3/MALT1/PLCE1/PLCD3/H3C10/PIK3CD/ACTB/H3C15/ACTN4/H3C14/H3C2/VCL/PLCB4/PIK3R3/ACTG1/H3C1/H3C3	29
52	downregulated.Antt vs VC	Downregulated	Antt vs VC	hsa04217	Necroptosis	21/541	159/8163	0.00180616	0.0105591	0.00760489	CAPN1/H2AC6/CAPN2/TRAF2/H2AC21/STAT5B/HMGB1/FAS/H2AC19/H2AC18/H2AC13/H2AC20/H2AX/GLUL/H2AC11/H2AC15/H2AC14/H2AC16/H2AC12/H2AC4/H2AC1	21
53	downregulated.Antt vs VC	Downregulated	Antt vs VC	hsa01521	EGFR tyrosine kinase inhibitor resistance	13/541	79/8163	0.0018982	0.0108878	0.00784164	AXL/IGF1R/PDGFA/GAS6/PIK3CD/PDGFB/EGF/PDGFC/PIK3R3/PDGFRB/FGFR2/FGFR3/NRG1	13
54	downregulated.Antt vs VC	Downregulated	Antt vs VC	hsa04371	Apelin signaling pathway	19/541	139/8163	0.00196622	0.0110691	0.00797218	CALM3/PLCB3/ADCY9/ADCY3/RRAS2/MYLK/NOTCH3/SMAD3/GNAI1/GNG2/CCND1/CAMK4/APLN/SLC8A1/PLAT/SERPINE1/PLCB4/ACTA2/CCN2	19
55	downregulated.Antt vs VC	Downregulated	Antt vs VC	hsa05206	MicroRNAs in cancer	34/541	310/8163	0.00241573	0.0133524	0.00961668	VIM/CD44/KIF23/TIMP3/PDGFA/CDC25C/NOTCH1/EZH2/FSCN1/BMPR2/NOTCH3/CDK6/MARCKS/PIK3CD/PDGFB/CDC25A/RECK/CDC25B/STMN1/CCND1/GLS/PIK3R3/PDGFRB/EZR/E2F1/E2F2/IRS1/THBS1/TPM1/FGFR3/SOX4/CCNE2/WNT3/TGFB2	34
56	downregulated.Antt vs VC	Downregulated	Antt vs VC	hsa04210	Apoptosis	18/541	136/8163	0.00364624	0.0197939	0.014256	CAPN1/TUBA4A/CAPN2/TRAF2/GADD45B/SPTAN1/FAS/MAP3K14/TUBA1C/LMNB2/TUBA1A/PIK3CD/LMNA/ACTB/CASP6/LMNB1/PIK3R3/ACTG1	18
57	downregulated.Antt vs VC	Downregulated	Antt vs VC	hsa04971	Gastric acid secretion	12/541	76/8163	0.00398126	0.0212334	0.0152927	CALM3/PLCB3/ADCY9/ADCY3/ATP1B1/MYLK/SSTR2/ACTB/GNAI1/PLCB4/ACTG1/EZR	12
58	downregulated.Antt vs VC	Downregulated	Antt vs VC	hsa05210	Colorectal cancer	13/541	86/8163	0.00409564	0.0214668	0.0154609	RALB/GADD45B/DDB2/TGFB1/PIK3CD/SMAD3/EGF/CCND1/TGFB3/AXIN2/PIK3R3/TCF7L1/TGFB2	13
59	downregulated.Antt vs VC	Downregulated	Antt vs VC	hsa05418	Fluid shear stress and atherosclerosis	18/541	139/8163	0.00461092	0.023758	0.017111	CALM3/SDC1/SUMO3/MAPK12/PDGFA/SDC2/BMPR2/PIK3CD/ACTB/PDGFB/PLAT/PIK3R3/ACTG1/GSTA4/CAV2/CAV1/EDN1/BMP4	18
60	downregulated.Antt vs VC	Downregulated	Antt vs VC	hsa05219	Bladder cancer	8/541	41/8163	0.00481654	0.0244038	0.0175761	DAPK1/HBEGF/EGF/CCND1/E2F1/E2F2/THBS1/FGFR3	8
61	downregulated.Antt vs VC	Downregulated	Antt vs VC	hsa04924	Renin secretion	11/541	69/8163	0.00531335	0.0264796	0.0190712	KCNMA1/CALM3/CACNA1C/PLCB3/GNAI1/PLCB4/PDE1C/ADCYAP1/ADORA1/ADRB2/EDN1	11
62	downregulated.Antt vs VC	Downregulated	Antt vs VC	hsa04152	AMPK signaling pathway	16/541	121/8163	0.00600039	0.0294213	0.0211898	PFKFB3/HMGCR/PPP2R1B/IGF1R/TBC1D1/SCD/FASN/SCD5/PIK3CD/PPP2R5D/CCND1/CCNA2/PIK3R3/PPP2R2B/IRS1/CREB3L1	16
63	downregulated.Antt vs VC	Downregulated	Antt vs VC	hsa05146	Amoebiasis	14/541	102/8163	0.00710433	0.0342812	0.0246901	PLCB3/ACTN1/TGFB1/PIK3CD/COL4A5/HSPB1/ACTN4/COL4A1/LAMA5/TGFB3/VCL/PLCB4/PIK3R3/TGFB2	14
64	downregulated.Antt vs VC	Downregulated	Antt vs VC	hsa05223	Non-small cell lung cancer	11/541	72/8163	0.00736123	0.0349658	0.0251831	RXRA/GADD45B/STAT5B/DDB2/CDK6/PIK3CD/EGF/CCND1/PIK3R3/E2F1/E2F2	11
65	downregulated.Antt vs VC	Downregulated	Antt vs VC	hsa03030	DNA replication	7/541	36/8163	0.00836426	0.039119	0.0281744	PCNA/MCM3/MCM2/POLE/PRIM1/DNA2/MCM5	7
66	downregulated.Antt vs VC	Downregulated	Antt vs VC	hsa04960	Aldosterone-regulated sodium reabsorption	7/541	37/8163	0.0097424	0.0448741	0.0323193	SLC9A3R2/ATP1B1/SGK1/PIK3CD/PIK3R3/SFN/IRS1	7
67	downregulated.Antt vs VC	Downregulated	Antt vs VC	hsa05130	Pathogenic Escherichia coli infection	22/541	197/8163	0.0108906	0.0490563	0.0353314	ACTR3/TUBA4A/LPAR1/TRAF2/ROCK2/TUBB/MYO1E/MYO1B/MYH9/MAPK12/FAS/CYTH3/BAIAP2/TUBA1C/TUBB6/TUBA1A/ACTB/TUBB3/F2R/ACTG1/EZR/LPAR4	22
68	downregulated.Antt vs VC	Downregulated	Antt vs VC	hsa04926	Relaxin signaling pathway	16/541	129/8163	0.0109731	0.0490563	0.0353314	PLCB3/ADCY9/TGFB1/MAPK12/ADCY3/PIK3CD/COL4A5/GNAI1/GNG2/COL4A1/VEGFC/PLCB4/PIK3R3/ACTA2/CREB3L1/EDN1	16
69	downregulated.??-T3 vs VC	Downregulated	??-T3 vs VC	hsa04390	Hippo signaling pathway	47/732	157/8163	3.12294e-14	9.77482e-12	6.80473e-12	YAP1/LIMD1/TEAD1/SCRIB/WWTR1/PPP2R1B/FZD8/AJUBA/TGFB1/NF2/MYC/TCF7L2/BMPR2/WTIP/WNT9A/FZD1/FZD2/AXIN2/FZD7/BIRC3/ACTB/TEAD4/TGFB3/FZD4/GLI2/TCF7L1/PPP2R2B/FRMD6/WWC1/SERPINE1/SMAD3/TEAD2/WNT5A/ACTG1/CCND1/SMAD7/WNT7A/WNT3/WNT5B/SNAI2/FGF1/WNT7B/NKD1/TGFB2/CCN2/BMP4/ID1	47
70	downregulated.??-T3 vs VC	Downregulated	??-T3 vs VC	hsa05205	Proteoglycans in cancer	50/732	205/8163	2.50715e-11	3.55808e-09	2.47695e-09	CD44/FLNA/TLR4/AKT3/RRAS2/HIF1A/ROCK2/ERBB2/HPSE/SMO/PXN/FZD8/FAS/MAPK12/MAPK11/GPC1/ITGA5/SDC1/TGFB1/MET/PLCE1/PIK3R3/MYC/IGF1R/WNT9A/PTCH1/HBEGF/FZD1/FZD2/PIK3CD/FZD7/TIMP3/SDC2/ACTB/FZD4/HSPG2/EZR/WNT5A/ANK1/ACTG1/COL1A1/CCND1/THBS1/WNT7A/CAV1/WNT3/WNT5B/CAV2/WNT7B/TGFB2	50
71	downregulated.??-T3 vs VC	Downregulated	??-T3 vs VC	hsa04110	Cell cycle	37/732	126/8163	3.4103e-11	3.55808e-09	2.47695e-09	TFDP1/MCM2/CCNB1/HDAC1/PCNA/CDKN2A/TFDP2/MCM3/PTTG1/TGFB1/RBL1/CDC25A/PLK1/CDKN2B/GADD45B/MYC/CDC25B/CDC14A/PKMYT1/ESPL1/CDK6/CCNA2/CDKN2C/WEE1/E2F2/MCM5/SKP2/TGFB3/CDK1/E2F1/SMAD3/SFN/CDC7/CDK2/CCND1/CCNE2/TGFB2	37
72	downregulated.??-T3 vs VC	Downregulated	??-T3 vs VC	hsa05034	Alcoholism	46/732	187/8163	1.18497e-10	9.27241e-09	6.45498e-09	H2AZ1/H2BC5/HDAC1/H3C10/H2BC13/H3C2/CALM2/H2BC6/H3C15/H3C14/H3-3A/H2BC21/H4C14/H4C2/H2AC20/H4C15/CALM3/H2BC11/GNG11/H2BC18/H2AC11/H2AC14/H2AC16/CAMK4/GNG4/H2AX/CAMKK1/GNAI1/H3C1/SLC29A1/H3C3/H2BC17/H3C13/H2AC15/GNG2/H2AC12/PKIA/H2BC3/H2AC4/H2AC1/BDNF/GRIN2A/H2BC1/CREB3L1/H2BC14/DRD1	46
73	downregulated.??-T3 vs VC	Downregulated	??-T3 vs VC	hsa04015	Rap1 signaling pathway	49/732	210/8163	2.14521e-10	1.3429e-08	9.34862e-09	VASP/MAGI1/RALB/AKT3/CALM2/EFNA5/PLCB3/BCAR1/SIPA1L2/EVL/MAPK12/MAPK11/LPAR1/CALM3/MET/MAGI3/ADCY3/ENAH/ADCY9/PLCE1/PIK3R3/IGF1R/PDGFA/PDGFRA/PIK3CD/EPHA2/RASSF5/GNAI1/ACTB/ANGPT1/CSF1/PLCB4/PDGFC/KITLG/EGF/FPR1/PDGFB/FGFR2/FGF5/PDGFRB/F2R/ACTG1/THBS1/VEGFC/GRIN2A/FGF1/FGFR3/LPAR4/ID1	49
74	downregulated.??-T3 vs VC	Downregulated	??-T3 vs VC	hsa04510	Focal adhesion	47/732	201/8163	4.70391e-10	2.45387e-08	1.70826e-08	MYL12A/PIP5K1C/VASP/MYL9/MAPK9/FLNA/AKT3/ACTN1/CAPN2/ROCK2/LAMC1/ERBB2/ITGA6/BCAR1/PXN/ZYX/ITGA5/MET/COL4A2/PIK3R3/IGF1R/PDGFA/MYLK/ITGA7/LAMA2/PDGFRA/PIK3CD/BIRC3/ACTN4/ACTB/COL4A5/PDGFC/VCL/EGF/PDGFB/PDGFRB/ACTG1/LAMA5/COL1A1/CCND1/COL4A1/THBS1/VEGFC/CAV1/CAV2/ITGA4/ITGB8	47
75	downregulated.??-T3 vs VC	Downregulated	??-T3 vs VC	hsa04613	Neutrophil extracellular trap formation	45/732	190/8163	7.17309e-10	3.2074e-08	2.23283e-08	H2AZ1/H2BC5/HDAC1/H3C10/TLR4/AKT3/H2BC13/H3C2/PLCB3/H2BC6/H3C15/H3C14/H3-3A/H2BC21/MAPK12/H4C14/H4C2/H2AC20/H4C15/MAPK11/HMGB1/H2BC11/H2BC18/SELPLG/H2AC11/PIK3R3/H2AC14/H2AC16/PIK3CD/H2AX/ACTB/H3C1/H3C3/H2BC17/PLCB4/H3C13/H2AC15/FPR1/H2AC12/H2BC3/ACTG1/H2AC4/H2AC1/H2BC1/H2BC14	45
76	downregulated.??-T3 vs VC	Downregulated	??-T3 vs VC	hsa05226	Gastric cancer	38/732	149/8163	1.6978e-09	6.64264e-08	4.62427e-08	AKT3/ERBB2/RXRA/FZD8/LRP5/TGFB1/MET/CDKN2B/GADD45B/PIK3R3/MYC/TCF7L2/WNT9A/FZD1/FZD2/PIK3CD/AXIN2/FZD7/E2F2/TGFB3/FZD4/E2F1/TCF7L1/EGF/SMAD3/FGFR2/FGF5/WNT5A/CDK2/RARB/CCND1/CCNE2/WNT7A/WNT3/WNT5B/FGF1/WNT7B/TGFB2	38
77	downregulated.??-T3 vs VC	Downregulated	??-T3 vs VC	hsa04310	Wnt signaling pathway	40/732	170/8163	7.91843e-09	2.75385e-07	1.91709e-07	TBL1X/ROR1/MAPK9/ROCK2/PLCB3/FZD8/LRP5/SFRP1/CTNNBIP1/TLE3/MYC/TCF7L2/WNT9A/FZD1/TBL1XR1/FZD2/AXIN2/FZD7/VANGL1/CCN4/PLCB4/BAMBI/FZD4/APCDD1L/TCF7L1/DAAM2/SMAD3/WNT5A/CTNND2/PRICKLE1/CCND1/TLE4/WNT7A/PRICKLE2/WNT3/WNT5B/WNT7B/NKD1/LGR5/LGR4	40
78	downregulated.??-T3 vs VC	Downregulated	??-T3 vs VC	hsa05217	Basal cell carcinoma	22/732	63/8163	1.01351e-08	3.17229e-07	2.20839e-07	SMO/FZD8/SUFU/GLI3/GADD45B/TCF7L2/WNT9A/PTCH1/FZD1/FZD2/AXIN2/FZD7/FZD4/GLI2/TCF7L1/WNT5A/WNT7A/WNT3/WNT5B/WNT7B/HHIP/BMP4	22
79	downregulated.??-T3 vs VC	Downregulated	??-T3 vs VC	hsa05322	Systemic lupus erythematosus	34/732	136/8163	2.13008e-08	6.06104e-07	4.21939e-07	H2AZ1/H2BC5/H3C10/H2BC13/ACTN1/H3C2/H2BC6/H3C15/H3C14/H3-3A/H2BC21/H4C14/H4C2/H2AC20/H4C15/H2BC11/H2BC18/H2AC11/H2AC14/H2AC16/H2AX/ACTN4/H3C1/H3C3/H2BC17/H3C13/H2AC15/H2AC12/H2BC3/H2AC4/H2AC1/GRIN2A/H2BC1/H2BC14	34
80	downregulated.??-T3 vs VC	Downregulated	??-T3 vs VC	hsa04151	PI3K-Akt signaling pathway	64/732	354/8163	2.65546e-08	6.92632e-07	4.82176e-07	PHLPP1/MAGI1/PHLPP2/TLR4/AKT3/IL4R/EFNA5/LAMC1/ERBB2/ITGA6/GYS1/PPP2R1B/RXRA/LPAR1/ITGA5/MET/GNG11/PPP2R5D/COL4A2/PIK3R3/SGK1/MYC/IGF1R/PDGFA/GNG4/ITGA7/LAMA2/CDK6/PDGFRA/PKN3/PIK3CD/EPHA2/ANGPT1/CSF1/COL4A5/PDGFC/KITLG/PPP2R2B/EGF/PDGFB/GNG2/FGFR2/FGF5/PDGFRB/NTF3/F2R/CDK2/LAMA5/COL1A1/CCND1/COL4A1/THBS1/CCNE2/BDNF/VEGFC/IRS1/FGF1/IL7R/CREB3L1/FGFR3/LPAR4/ITGA4/ITGB8/NTF4	64
81	downregulated.??-T3 vs VC	Downregulated	??-T3 vs VC	hsa04218	Cellular senescence	36/732	156/8163	7.62456e-08	1.83576e-06	1.27796e-06	CCNB1/CAPN1/FOXM1/AKT3/RRAS2/CAPN2/ZFP36L1/CALM2/CDKN2A/MAPK12/MCU/MAPK11/CALM3/TGFB1/RBL1/CDC25A/CDKN2B/GADD45B/PIK3R3/MYC/MYBL2/CDK6/PIK3CD/CCNA2/RASSF5/IGFBP3/E2F2/TGFB3/CDK1/E2F1/SERPINE1/SMAD3/CDK2/CCND1/CCNE2/TGFB2	36
82	downregulated.??-T3 vs VC	Downregulated	??-T3 vs VC	hsa04350	TGF-beta signaling pathway	26/732	94/8163	1.1314e-07	2.52948e-06	1.7609e-06	TFDP1/FBN1/NEO1/PPP2R1B/TGIF2/RGMB/TGFB1/RBL1/CDKN2B/MYC/BMPR2/SMURF2/TGFB3/BAMBI/SMAD3/FST/SMAD7/THBS1/PITX2/SMAD9/SMAD6/ID3/TGFB2/INHBA/BMP4/ID1	26
83	downregulated.??-T3 vs VC	Downregulated	??-T3 vs VC	hsa05225	Hepatocellular carcinoma	37/732	168/8163	1.80928e-07	3.77536e-06	2.62822e-06	SMARCC2/SMARCA4/AKT3/CDKN2A/FZD8/LRP5/TGFB1/MET/GADD45B/PIK3R3/MYC/IGF1R/DPF1/TCF7L2/WNT9A/FZD1/CDK6/FZD2/PIK3CD/AXIN2/FZD7/E2F2/ACTB/TGFB3/GSTA4/FZD4/E2F1/TCF7L1/SMAD3/WNT5A/ACTG1/CCND1/WNT7A/WNT3/WNT5B/WNT7B/TGFB2	37
84	downregulated.??-T3 vs VC	Downregulated	??-T3 vs VC	hsa04550	Signaling pathways regulating pluripotency of stem cells	33/732	143/8163	2.66943e-07	5.22206e-06	3.63534e-06	AKT3/SKIL/FZD8/MAPK12/MAPK11/TBX3/PIK3R3/MYC/IGF1R/BMPR2/WNT9A/FZD1/FZD2/PIK3CD/AXIN2/FZD7/LIFR/FZD4/PAX6/SMAD3/FGFR2/WNT5A/WNT7A/WNT3/WNT5B/SMAD9/WNT7B/FGFR3/ID3/INHBA/BMP4/DLX5/ID1	33
85	downregulated.??-T3 vs VC	Downregulated	??-T3 vs VC	hsa04810	Regulation of actin cytoskeleton	43/732	218/8163	4.96327e-07	9.13826e-06	6.3616e-06	ACTR3/MYL12A/PIP5K1C/MYL9/ARPC5/RRAS2/ACTN1/PIP4K2B/ROCK2/ACTR3B/ITGA6/BCAR1/BAIAP2/PXN/GSN/MYH9/LPAR1/ITGA5/LIMK2/ENAH/PIK3R3/PDGFA/MYLK/ITGA7/PDGFRA/PIK3CD/ACTN4/ACTB/PDGFC/VCL/EZR/EGF/PDGFB/FGFR2/FGF5/PDGFRB/F2R/ACTG1/FGF1/FGFR3/LPAR4/ITGA4/ITGB8	43
86	downregulated.??-T3 vs VC	Downregulated	??-T3 vs VC	hsa05224	Breast cancer	32/732	147/8163	1.60989e-06	2.79942e-05	1.94882e-05	AKT3/ERBB2/FZD8/LRP5/GADD45B/PIK3R3/MYC/IGF1R/NOTCH1/TCF7L2/WNT9A/FZD1/CDK6/FZD2/PIK3CD/HES1/AXIN2/FZD7/E2F2/FZD4/E2F1/TCF7L1/EGF/NOTCH3/FGF5/WNT5A/CCND1/WNT7A/WNT3/WNT5B/FGF1/WNT7B	32
87	downregulated.??-T3 vs VC	Downregulated	??-T3 vs VC	hsa04530	Tight junction	35/732	169/8163	1.8052e-06	2.97383e-05	2.07023e-05	ACTR3/MYL12A/VASP/PCNA/MYL9/MAGI1/ARPC5/MAPK9/MICALL2/ACTN1/ROCK2/ACTR3B/ERBB2/SCRIB/MYL6/MAP3K1/PPP2R1B/MYH9/TJP2/TUBA1C/RUNX1/CLDN4/NF2/MPP4/TUBA4A/TUBA1A/ACTN4/ACTB/CGNL1/EZR/PPP2R2B/AMOTL2/SYNPO/ACTG1/CCND1	35
88	downregulated.??-T3 vs VC	Downregulated	??-T3 vs VC	hsa05165	Human papillomavirus infection	56/732	331/8163	1.90214e-06	2.97686e-05	2.07234e-05	HDAC1/MAGI1/PKM/AKT3/LAMC1/ITGA6/SCRIB/PPP2R1B/TCIRG1/PXN/FZD8/FAS/ITGA5/RBL1/PPP2R5D/COL4A2/PIK3R3/HES4/NOTCH1/TCF7L2/WNT9A/ITGA7/FZD1/LAMA2/CDK6/FZD2/PIK3CD/HES1/CCNA2/AXIN2/FZD7/MAML2/COL4A5/FZD4/E2F1/TCF7L1/PPP2R2B/EGF/NOTCH3/PDGFRB/WNT5A/CDK2/LAMA5/COL1A1/CCND1/COL4A1/THBS1/CCNE2/WNT7A/WNT3/WNT5B/CREB3L1/WNT7B/ITGA4/ITGB8/LFNG	56
89	downregulated.??-T3 vs VC	Downregulated	??-T3 vs VC	hsa04520	Adherens junction	20/732	71/8163	2.41435e-06	3.59854e-05	2.50512e-05	ACTN1/NECTIN3/PTPRF/PTPRB/ERBB2/BAIAP2/SNAI1/MET/IGF1R/TCF7L2/ACTN4/NECTIN1/ACTB/VCL/TCF7L1/SMAD3/ACTG1/SNAI2/PTPRJ/LMO7	20
90	downregulated.??-T3 vs VC	Downregulated	??-T3 vs VC	hsa05414	Dilated cardiomyopathy	24/732	96/8163	2.56252e-06	3.64577e-05	2.538e-05	SGCB/CACNA1C/ITGA6/TPM4/DMD/CACNA2D1/ITGA5/TGFB1/ADCY3/LMNA/ADCY9/CACNB3/ITGA7/LAMA2/SLC8A1/ACTB/TPM2/TGFB3/DES/ACTG1/TPM1/ITGA4/TGFB2/ITGB8	24
91	downregulated.??-T3 vs VC	Downregulated	??-T3 vs VC	hsa05410	Hypertrophic cardiomyopathy	23/732	90/8163	2.75692e-06	3.75181e-05	2.61182e-05	SGCB/CACNA1C/ITGA6/TPM4/DMD/CACNA2D1/ITGA5/TGFB1/LMNA/CACNB3/ITGA7/LAMA2/SLC8A1/ACTB/TPM2/TGFB3/DES/ACTG1/TPM1/ITGA4/TGFB2/ITGB8/EDN1	23
92	downregulated.??-T3 vs VC	Downregulated	??-T3 vs VC	hsa04392	Hippo signaling pathway - multiple species	12/732	29/8163	3.05915e-06	3.83933e-05	2.67275e-05	YAP1/LIMD1/TEAD1/WWTR1/AJUBA/NF2/WTIP/FAT4/TEAD4/FRMD6/WWC1/TEAD2	12
93	downregulated.??-T3 vs VC	Downregulated	??-T3 vs VC	hsa05218	Melanoma	20/732	72/8163	3.06656e-06	3.83933e-05	2.67275e-05	AKT3/CDKN2A/MET/GADD45B/PIK3R3/IGF1R/PDGFA/CDK6/PDGFRA/PIK3CD/MITF/E2F2/PDGFC/E2F1/EGF/PDGFB/FGF5/PDGFRB/CCND1/FGF1	20
94	downregulated.??-T3 vs VC	Downregulated	??-T3 vs VC	hsa05222	Small cell lung cancer	23/732	92/8163	4.13677e-06	4.98004e-05	3.46685e-05	AKT3/LAMC1/ITGA6/RXRA/COL4A2/CDKN2B/GADD45B/PIK3R3/MYC/LAMA2/CDK6/PIK3CD/BIRC3/E2F2/COL4A5/SKP2/E2F1/CDK2/LAMA5/RARB/CCND1/COL4A1/CCNE2	23
95	downregulated.??-T3 vs VC	Downregulated	??-T3 vs VC	hsa04933	AGE-RAGE signaling pathway in diabetic complications	24/732	100/8163	5.53686e-06	6.41865e-05	4.46834e-05	MAPK9/STAT5B/AKT3/PLCB3/MAPK12/MAPK11/TGFB1/COL4A2/PLCD3/PLCE1/PIK3R3/PIK3CD/PLCB4/COL4A5/TGFB3/SERPINE1/SMAD3/COL1A1/CCND1/COL4A1/VEGFC/TGFB2/F3/EDN1	24
96	downregulated.??-T3 vs VC	Downregulated	??-T3 vs VC	hsa04916	Melanogenesis	24/732	101/8163	6.65971e-06	7.44461e-05	5.18256e-05	CALM2/PLCB3/FZD8/CALM3/ADCY3/ADCY9/TCF7L2/WNT9A/FZD1/FZD2/FZD7/MITF/GNAI1/PLCB4/FZD4/KITLG/TCF7L1/WNT5A/WNT7A/WNT3/WNT5B/CREB3L1/WNT7B/EDN1	24
97	downregulated.??-T3 vs VC	Downregulated	??-T3 vs VC	hsa05212	Pancreatic cancer	20/732	76/8163	7.5862e-06	8.18786e-05	5.69998e-05	RALBP1/RALB/MAPK9/AKT3/CDKN2A/ERBB2/RAD51/PLD2/TGFB1/GADD45B/PIK3R3/CDK6/PIK3CD/E2F2/TGFB3/E2F1/EGF/SMAD3/CCND1/TGFB2	20
98	downregulated.??-T3 vs VC	Downregulated	??-T3 vs VC	hsa05412	Arrhythmogenic right ventricular cardiomyopathy	20/732	77/8163	9.40161e-06	9.80901e-05	6.82853e-05	SGCB/CDH2/CACNA1C/ITGA6/DMD/GJA1/CACNA2D1/ITGA5/LMNA/CACNB3/TCF7L2/ITGA7/LAMA2/SLC8A1/ACTB/DES/TCF7L1/ACTG1/ITGA4/ITGB8	20
99	downregulated.??-T3 vs VC	Downregulated	??-T3 vs VC	hsa04360	Axon guidance	35/732	182/8163	1.03905e-05	0.000104911	7.30337e-05	MYL12A/EFNB1/EPHB2/MYL9/ROCK2/EFNA5/NEO1/SMO/NTNG1/SEMA3F/PLXNA2/BOC/SEMA4F/PLXNB1/MET/ABLIM1/LIMK2/PLXNA1/ENAH/PIK3R3/BMPR2/PTCH1/PIK3CD/EPHA2/GNAI1/EPHB6/SLIT2/UNC5C/WNT5A/EFNB2/TRPC4/SEMA3C/PLXNA4/SEMA7A/WNT5B	35
100	downregulated.??-T3 vs VC	Downregulated	??-T3 vs VC	hsa05203	Viral carcinogenesis	37/732	204/8163	2.31245e-05	0.000220453	0.000153468	H2BC5/HDAC1/PKM/STAT5B/H2BC13/ACTN1/KAT2B/CDKN2A/H2BC6/SCRIB/PXN/GSN/H2BC21/H4C14/H4C2/H4C15/H2BC11/RBL1/H2BC18/SRF/CDKN2B/PIK3R3/CDK6/PIK3CD/CCNA2/ACTN4/H2BC17/SKP2/CDK1/CCR3/H2BC3/CDK2/CCND1/CCNE2/H2BC1/CREB3L1/H2BC14	37
101	downregulated.??-T3 vs VC	Downregulated	??-T3 vs VC	hsa04540	Gap junction	21/732	88/8163	2.32426e-05	0.000220453	0.000153468	PLCB3/TUBB/GJA1/LPAR1/TUBA1C/ADCY3/ADCY9/TUBA4A/PDGFA/TUBB3/TUBB6/PDGFRA/TUBA1A/GNAI1/PLCB4/CDK1/PDGFC/EGF/PDGFB/PDGFRB/DRD1	21
102	downregulated.??-T3 vs VC	Downregulated	??-T3 vs VC	hsa04010	MAPK signaling pathway	48/732	294/8163	2.76266e-05	0.000254327	0.00017705	MAP3K20/MAPK9/FLNA/CACNA1C/AKT3/RRAS2/EFNA5/ERBB2/MAP3K1/RPS6KA4/HSPA8/FAS/MAPK12/CACNA2D1/MAPK11/TGFB1/MET/HSPB1/CACNB3/SRF/GADD45B/MYC/IGF1R/CDC25B/RPS6KA1/PDGFA/PDGFRA/STMN1/EPHA2/MAP3K14/ANGPT1/CSF1/TGFB3/PDGFC/KITLG/EGF/PDGFB/MECOM/FGFR2/FGF5/PDGFRB/NTF3/BDNF/VEGFC/FGF1/FGFR3/TGFB2/NTF4	48
103	downregulated.??-T3 vs VC	Downregulated	??-T3 vs VC	hsa05215	Prostate cancer	22/732	97/8163	3.49277e-05	0.000312353	0.000217444	AKT3/ERBB2/PIK3R3/IGF1R/PDGFA/TCF7L2/PDGFRA/PIK3CD/E2F2/PDGFC/E2F1/TCF7L1/EGF/PDGFB/FGFR2/PDGFRB/PLAT/NKX3-1/CDK2/CCND1/CCNE2/CREB3L1	22
104	downregulated.??-T3 vs VC	Downregulated	??-T3 vs VC	hsa05202	Transcriptional misregulation in cancer	35/732	193/8163	3.84324e-05	0.000328942	0.000228993	NSD2/FUT8/FUS/HDAC1/H3C10/H3C2/H3C15/H3C14/H3-3A/SLC45A3/RXRA/SIX1/FLI1/RUNX1/MET/SSX2/SSX2B/GRIA3/HOXA10/GADD45B/MYC/IGF1R/PDGFA/CCNA2/CDKN2C/BIRC3/MITF/IGFBP3/HMGA2/RUNX2/H3C1/H3C3/H3C13/PBX3/PLAT	35
105	downregulated.??-T3 vs VC	Downregulated	??-T3 vs VC	hsa04934	Cushing syndrome	30/732	155/8163	3.88845e-05	0.000328942	0.000228993	CACNA1C/CDKN2A/PLCB3/FZD8/ADCY3/ADCY9/CDKN2B/TCF7L2/WNT9A/FZD1/CDK6/FZD2/CDKN2C/AXIN2/FZD7/E2F2/GNAI1/PLCB4/FZD4/E2F1/TCF7L1/WNT5A/CDK2/CCND1/CCNE2/WNT7A/WNT3/WNT5B/CREB3L1/WNT7B	30
106	downregulated.??-T3 vs VC	Downregulated	??-T3 vs VC	hsa04014	Ras signaling pathway	40/732	235/8163	4.97712e-05	0.000409957	0.000285392	RALBP1/RALB/MAPK9/AKT3/RRAS2/CALM2/EFNA5/PLD2/CALM3/MET/ETS2/GNG11/PLCE1/PIK3R3/IGF1R/PDGFA/GNG4/PDGFRA/RIN1/PIK3CD/EPHA2/RASSF5/ANGPT1/CSF1/PDGFC/KITLG/EGF/PDGFB/GNG2/FGFR2/FGF5/PDGFRB/NTF3/KSR2/BDNF/VEGFC/GRIN2A/FGF1/FGFR3/NTF4	40
107	downregulated.??-T3 vs VC	Downregulated	??-T3 vs VC	hsa05131	Shigellosis	41/732	247/8163	7.24191e-05	0.00058121	0.000404609	ACTR3/MYL12A/CD44/CAPN1/MYL9/ARPC5/H3C10/FNBP1L/MAPK9/TLR4/AKT3/ACTN1/CAPN2/H3C2/ROCK2/ACTR3B/PLCB3/CYTH3/SEPTIN8/BCAR1/H3C15/H3C14/H3-3A/PXN/MAPK12/MAPK11/ITGA5/MALT1/PLCD3/PLCE1/PIK3R3/PIK3CD/ACTN4/ACTB/H3C1/H3C3/PLCB4/H3C13/VCL/NLRP3/ACTG1	41
108	downregulated.??-T3 vs VC	Downregulated	??-T3 vs VC	hsa05214	Glioma	18/732	75/8163	8.13408e-05	0.000636492	0.000443093	AKT3/CALM2/CDKN2A/CALM3/GADD45B/PIK3R3/IGF1R/PDGFA/CAMK4/CDK6/PDGFRA/PIK3CD/E2F2/E2F1/EGF/PDGFB/PDGFRB/CCND1	18
109	downregulated.??-T3 vs VC	Downregulated	??-T3 vs VC	hsa05220	Chronic myeloid leukemia	18/732	76/8163	9.78399e-05	0.000746924	0.000519971	HDAC1/STAT5B/AKT3/CDKN2A/TGFB1/RUNX1/GADD45B/PIK3R3/MYC/CDK6/PIK3CD/E2F2/TGFB3/E2F1/MECOM/SMAD3/CCND1/TGFB2	18
110	downregulated.??-T3 vs VC	Downregulated	??-T3 vs VC	hsa05230	Central carbon metabolism in cancer	17/732	70/8163	0.000108982	0.000812174	0.000565395	G6PD/LDHA/PFKP/PKM/AKT3/HIF1A/ERBB2/MET/SLC16A3/PIK3R3/MYC/PDGFRA/PIK3CD/GLS/FGFR2/PDGFRB/FGFR3	17
111	downregulated.??-T3 vs VC	Downregulated	??-T3 vs VC	hsa04020	Calcium signaling pathway	39/732	240/8163	0.000171986	0.0012519	0.00087151	CACNA1C/CALM2/PLCB3/ERBB2/ITPKB/MCU/CALM3/MET/HRH1/ADCY3/ADCY9/PLCD3/PLCE1/PDGFA/CAMK4/MYLK/PDGFRA/SLC8A1/PLCB4/PDE1C/PDGFC/TBXA2R/EGF/PDGFB/FGFR2/FGF5/PDGFRB/ATP2B4/F2R/PTGFR/VEGFC/GRIN2A/OXTR/FGF1/ADRA1D/ADRB2/FGFR3/ADRA1B/DRD1	39
112	downregulated.??-T3 vs VC	Downregulated	??-T3 vs VC	hsa04115	p53 signaling pathway	17/732	73/8163	0.0001893	0.00134661	0.000937445	CCNB1/GTSE1/CDKN2A/FAS/TP53I3/GADD45B/SESN3/CDK6/IGFBP3/CDK1/RRM2/SERPINE1/SFN/CDK2/CCND1/THBS1/CCNE2	17
113	downregulated.??-T3 vs VC	Downregulated	??-T3 vs VC	hsa04068	FoxO signaling pathway	25/732	131/8163	0.000212647	0.00147908	0.00102966	CCNB1/PLK4/MAPK9/AKT3/MAPK12/MAPK11/TGFB1/PLK1/CDKN2B/GADD45B/PIK3R3/SGK1/IGF1R/PIK3CD/SKP2/TGFB3/EGF/SMAD3/S1PR1/CDK2/CCND1/IRS1/IL7R/PLK2/TGFB2	25
114	downregulated.??-T3 vs VC	Downregulated	??-T3 vs VC	hsa04024	cAMP signaling pathway	36/732	221/8163	0.000288687	0.00196433	0.00136747	MYL9/MAPK9/CACNA1C/AKT3/RRAS2/CALM2/ROCK2/PLD2/CALM3/ADCY3/GLI3/SSTR2/ADCY9/GRIA3/PLCE1/PIK3R3/CAMK4/PTCH1/PIK3CD/ATP1B1/GNAI1/SOX9/ADORA1/ATP2B4/F2R/HCN4/HCAR1/ADCYAP1/BDNF/GRIN2A/OXTR/ADRB2/CREB3L1/HHIP/DRD1/EDN1	36
115	downregulated.??-T3 vs VC	Downregulated	??-T3 vs VC	hsa04261	Adrenergic signaling in cardiomyocytes	27/732	150/8163	0.000327734	0.00218257	0.00151939	CACNA1C/AKT3/CALM2/PLCB3/PPP2R1B/TPM4/MAPK12/CACNA2D1/MAPK11/CALM3/ADCY3/PPP2R5D/ADCY9/CACNB3/SCN1B/ATP1B1/SLC8A1/GNAI1/PLCB4/TPM2/PPP2R2B/ATP2B4/TPM1/ADRA1D/ADRB2/CREB3L1/ADRA1B	27
116	downregulated.??-T3 vs VC	Downregulated	??-T3 vs VC	hsa05223	Non-small cell lung cancer	16/732	72/8163	0.000510193	0.0032797	0.00228316	STAT5B/AKT3/CDKN2A/ERBB2/RXRA/MET/GADD45B/PIK3R3/CDK6/PIK3CD/RASSF5/E2F2/E2F1/EGF/RARB/CCND1	16
117	downregulated.??-T3 vs VC	Downregulated	??-T3 vs VC	hsa01521	EGFR tyrosine kinase inhibitor resistance	17/732	79/8163	0.000513436	0.0032797	0.00228316	AKT3/ERBB2/AXL/MET/PIK3R3/IGF1R/PDGFA/PDGFRA/PIK3CD/GAS6/PDGFC/EGF/PDGFB/FGFR2/PDGFRB/NRG1/FGFR3	17
118	downregulated.??-T3 vs VC	Downregulated	??-T3 vs VC	hsa05146	Amoebiasis	20/732	102/8163	0.000619577	0.00387855	0.00270005	TLR4/ACTN1/PLCB3/LAMC1/TGFB1/COL4A2/HSPB1/PIK3R3/LAMA2/PIK3CD/ACTN4/PLCB4/COL4A5/TGFB3/VCL/RAB7B/LAMA5/COL1A1/COL4A1/TGFB2	20
119	downregulated.??-T3 vs VC	Downregulated	??-T3 vs VC	hsa04512	ECM-receptor interaction	18/732	88/8163	0.000677686	0.00415913	0.00289538	CD44/HMMR/LAMC1/ITGA6/ITGA5/SDC1/COL4A2/ITGA7/LAMA2/COL4A5/HSPG2/AGRN/LAMA5/COL1A1/COL4A1/THBS1/ITGA4/ITGB8	18
120	downregulated.??-T3 vs VC	Downregulated	??-T3 vs VC	hsa05219	Bladder cancer	11/732	41/8163	0.000719638	0.00433167	0.00301549	CDKN2A/DAPK1/ERBB2/MYC/HBEGF/E2F2/E2F1/EGF/CCND1/THBS1/FGFR3	11
121	downregulated.??-T3 vs VC	Downregulated	??-T3 vs VC	hsa00534	Glycosaminoglycan biosynthesis - heparan sulfate / heparin	8/732	24/8163	0.000805546	0.00475728	0.00331178	GLCE/EXTL3/XYLT2/NDST1/XYLT1/HS6ST1/EXTL1/HS3ST1	8
122	downregulated.??-T3 vs VC	Downregulated	??-T3 vs VC	hsa04919	Thyroid hormone signaling pathway	22/732	121/8163	0.000990091	0.00573886	0.0039951	PFKP/HDAC1/AKT3/HIF1A/KAT2B/PLCB3/RXRA/THRA/PLCD3/PLCE1/PIK3R3/MYC/NOTCH1/PIK3CD/ATP1B1/ACTB/PLCB4/NOTCH3/ACTG1/CCND1/DIO2/BMP4	22
123	downregulated.??-T3 vs VC	Downregulated	??-T3 vs VC	hsa04926	Relaxin signaling pathway	23/732	129/8163	0.00101394	0.00577022	0.00401693	MAPK9/AKT3/PLCB3/MAPK12/MAPK11/TGFB1/ADCY3/GNG11/COL4A2/ADCY9/PIK3R3/GNG4/PIK3CD/GNAI1/PLCB4/COL4A5/GNG2/ACTA2/COL1A1/COL4A1/VEGFC/CREB3L1/EDN1	23
124	downregulated.??-T3 vs VC	Downregulated	??-T3 vs VC	hsa05100	Bacterial invasion of epithelial cells	16/732	77/8163	0.00110919	0.00619956	0.00431582	ACTR3/ARPC5/ACTR3B/SEPTIN8/BCAR1/PXN/ITGA5/MET/PIK3R3/PIK3CD/ACTB/VCL/ARHGEF26/ACTG1/CAV1/CAV2	16
125	downregulated.??-T3 vs VC	Downregulated	??-T3 vs VC	hsa00100	Steroid biosynthesis	7/732	20/8163	0.00123949	0.00680633	0.00473822	LSS/DHCR24/CYP51A1/LBR/EBP/FDFT1/MSMO1	7
126	downregulated.??-T3 vs VC	Downregulated	??-T3 vs VC	hsa05418	Fluid shear stress and atherosclerosis	24/732	139/8163	0.00126677	0.00683618	0.004759	SUMO2/MAPK9/AKT3/CALM2/MAPK12/MAPK11/GPC1/SDC1/CALM3/SUMO3/PIK3R3/PDGFA/BMPR2/PIK3CD/SDC2/ACTB/GSTA4/PDGFB/PLAT/ACTG1/CAV1/CAV2/BMP4/EDN1	24
127	downregulated.??-T3 vs VC	Downregulated	??-T3 vs VC	hsa04072	Phospholipase D signaling pathway	25/732	148/8163	0.00139743	0.00741347	0.00516088	PIP5K1C/RALB/DGKH/AKT3/RRAS2/PLCB3/CYTH3/PLD2/LPAR1/ADCY3/ADCY9/PIK3R3/PDGFA/PDGFRA/PIK3CD/PLCB4/PDGFC/KITLG/EGF/PDGFB/PDGFRB/F2R/PTGFR/PLPP3/LPAR4	25
128	downregulated.??-T3 vs VC	Downregulated	??-T3 vs VC	hsa05132	Salmonella infection	37/732	249/8163	0.00142269	0.00742172	0.00516662	ACTR3/MYL12A/CSE1L/MYL9/ARPC5/MAPK9/FLNA/TLR4/AKT3/ROCK2/ACTR3B/CYTH3/TUBB/MAPK12/ANXA2/MAPK11/TUBA1C/MYC/TUBA4A/TCF7L2/TUBB3/TUBB6/PIK3CD/TUBA1A/BIRC3/PODXL/ACTB/TCF7L1/NLRP3/AHNAK/RHOB/S100A10/ARHGEF26/RAB7B/RAB9B/RHOJ/ACTG1	37
129	downregulated.??-T3 vs VC	Downregulated	??-T3 vs VC	hsa04914	Progesterone-mediated oocyte maturation	19/732	102/8163	0.0015944	0.00818112	0.00569528	CCNB1/MAPK9/AKT3/MAPK12/MAPK11/ADCY3/CDC25A/PLK1/ADCY9/PIK3R3/IGF1R/CDC25B/RPS6KA1/PKMYT1/PIK3CD/CCNA2/GNAI1/CDK1/CDK2	19
130	downregulated.??-T3 vs VC	Downregulated	??-T3 vs VC	hsa04022	cGMP-PKG signaling pathway	27/732	167/8163	0.00179189	0.00904614	0.00629746	KCNMA1/VASP/MYL9/CACNA1C/AKT3/CALM2/ROCK2/PLCB3/CALM3/ADCY3/ADCY9/PDE5A/SRF/MYLK/ATP1B1/SLC8A1/GNAI1/KCNMB1/PLCB4/ADORA1/ATP2B4/IRS1/ADRA1D/ADRB2/CREB3L1/NPPB/ADRA1B	27
131	downregulated.??-T3 vs VC	Downregulated	??-T3 vs VC	hsa04935	Growth hormone synthesis, secretion and action	21/732	120/8163	0.00209793	0.0104231	0.00725602	MAPK9/CACNA1C/STAT5B/AKT3/PLCB3/BCAR1/MAP3K1/MAPK12/MAPK11/ADCY3/SSTR2/ADCY9/SOCS2/PIK3R3/PIK3CD/IGFBP3/GNAI1/PLCB4/SOCS3/IRS1/CREB3L1	21
132	downregulated.??-T3 vs VC	Downregulated	??-T3 vs VC	hsa01522	Endocrine resistance	18/732	98/8163	0.00246261	0.0120437	0.0083842	MAPK9/AKT3/CDKN2A/ERBB2/MAPK12/MAPK11/ADCY3/ADCY9/PIK3R3/IGF1R/NOTCH1/HBEGF/PIK3CD/CDKN2C/E2F2/E2F1/NOTCH3/CCND1	18
133	downregulated.??-T3 vs VC	Downregulated	??-T3 vs VC	hsa04670	Leukocyte transendothelial migration	20/732	114/8163	0.00257063	0.0123785	0.00861732	MYL12A/VASP/MYL9/ACTN1/ROCK2/BCAR1/PXN/MAPK12/MAPK11/CLDN4/PIK3R3/PIK3CD/RASSF5/ACTN4/GNAI1/ACTB/VCL/EZR/ACTG1/ITGA4	20
134	downregulated.??-T3 vs VC	Downregulated	??-T3 vs VC	hsa04371	Apelin signaling pathway	23/732	139/8163	0.00280727	0.0133133	0.00926803	AKT3/RRAS2/CALM2/PLCB3/CALM3/ADCY3/GNG11/ADCY9/CAMK4/GNG4/MYLK/SLC8A1/GNAI1/PLCB4/SERPINE1/GNG2/NOTCH3/SMAD3/ACTA2/PLAT/APLN/CCND1/CCN2	23
135	downregulated.??-T3 vs VC	Downregulated	??-T3 vs VC	hsa05210	Colorectal cancer	16/732	86/8163	0.00366787	0.017135	0.0119285	RALB/MAPK9/AKT3/TGFB1/GADD45B/PIK3R3/MYC/TCF7L2/PIK3CD/AXIN2/TGFB3/TCF7L1/EGF/SMAD3/CCND1/TGFB2	16
136	downregulated.??-T3 vs VC	Downregulated	??-T3 vs VC	hsa04270	Vascular smooth muscle contraction	22/732	134/8163	0.00378513	0.0174227	0.0121288	KCNMA1/MYL9/CACNA1C/CALM2/ROCK2/PLCB3/MYL6/MYH9/CALM3/ADCY3/RAMP1/ADCY9/MYLK/ADM/KCNMB1/PLCB4/ACTA2/CALD1/ADRA1D/NPPB/ADRA1B/EDN1	22
137	downregulated.??-T3 vs VC	Downregulated	??-T3 vs VC	hsa05130	Pathogenic Escherichia coli infection	29/732	197/8163	0.005117	0.0232119	0.0161589	ACTR3/MYO1E/MYO10/ARPC5/MAPK9/TLR4/ROCK2/ACTR3B/CYTH3/MYO1B/BAIAP2/TUBB/FAS/MAPK12/MYH9/MAPK11/LPAR1/TUBA1C/CLDN4/TUBA4A/TUBB3/TUBB6/TUBA1A/ACTB/EZR/NLRP3/F2R/ACTG1/LPAR4	29
138	downregulated.??-T3 vs VC	Downregulated	??-T3 vs VC	hsa04666	Fc gamma R-mediated phagocytosis	17/732	97/8163	0.00528178	0.0236171	0.016441	ACTR3/PIP5K1C/MYO10/VASP/ARPC5/AKT3/ASAP1/ACTR3B/ASAP3/GSN/PLD2/LIMK2/PIK3R3/PIK3CD/AMPH/MARCKS/PLPP3	17
139	downregulated.??-T3 vs VC	Downregulated	??-T3 vs VC	hsa04514	Cell adhesion molecules	24/732	157/8163	0.00648868	0.028605	0.0199134	SDC3/ALCAM/CDH2/CD276/NRXN3/NECTIN3/PTPRF/ITGA6/NEO1/NTNG1/CADM1/SDC1/NLGN2/CLDN4/PDCD1LG2/SELPLG/VSIR/LRRC4B/SDC2/NECTIN1/SPN/CNTNAP2/ITGA4/ITGB8	24
140	downregulated.??-T3 vs VC	Downregulated	??-T3 vs VC	hsa05206	MicroRNAs in cancer	41/732	310/8163	0.00704327	0.0306186	0.0213151	CD44/EZH2/HDAC1/EFNA5/CDKN2A/ERBB2/SLC45A3/ITGA5/MET/CDC25A/PIK3R3/MYC/CDC25B/PDGFA/NOTCH1/BMPR2/CDK6/PDGFRA/STMN1/FSCN1/PIK3CD/TIMP3/E2F2/HMGA2/EZR/E2F1/GLS/MARCKS/PDGFB/NOTCH3/RECK/PDGFRB/CCND1/THBS1/CCNE2/IRS1/TPM1/WNT3/FGFR3/TGFB2/SOX4	41
141	downregulated.??-T3 vs VC	Downregulated	??-T3 vs VC	hsa05142	Chagas disease	17/732	102/8163	0.00880136	0.0377373	0.0262708	MAPK9/TLR4/AKT3/PLCB3/PPP2R1B/FAS/MAPK12/MAPK11/TGFB1/PIK3R3/PIK3CD/GNAI1/PLCB4/TGFB3/PPP2R2B/SERPINE1/TGFB2	17
142	downregulated.??-T3 vs VC	Downregulated	??-T3 vs VC	hsa05135	Yersinia infection	21/732	137/8163	0.010159	0.04297	0.0299135	ACTR3/PIP5K1C/ARPC5/MAPK9/TLR4/AKT3/ROCK2/ACTR3B/BCAR1/BAIAP2/PXN/MAPK12/MAPK11/ITGA5/PIK3R3/RPS6KA1/PIK3CD/ACTB/NLRP3/ACTG1/ITGA4	21
143	downregulated.??-T3 vs VC	Downregulated	??-T3 vs VC	hsa04150	mTOR signaling pathway	23/732	156/8163	0.0116444	0.0485959	0.03383	LPIN1/AKT3/FZD8/LRP5/LPIN3/CASTOR2/PIK3R3/SGK1/IGF1R/RPS6KA1/WNT9A/FZD1/FZD2/PIK3CD/FZD7/SKP2/FZD4/WNT5A/WNT7A/IRS1/WNT3/WNT5B/WNT7B	23
144	downregulated.??-T3 vs VC	Downregulated	??-T3 vs VC	hsa04070	Phosphatidylinositol signaling system	16/732	97/8163	0.0119473	0.0492038	0.0342532	ITPK1/PIP5K1C/DGKH/CALM2/PIP4K2B/PLCB3/ITPKB/CALM3/INPP5E/INPP5A/PLCD3/PLCE1/PIK3R3/PIK3CD/IMPA2/PLCB4	16
145	downregulated.??-T3 vs VC	Downregulated	??-T3 vs VC	hsa04613	Neutrophil extracellular trap formation	60/858	190/8163	8.78533e-16	2.77617e-13	1.84954e-13	AKT1/PLCG1/H2AC6/HDAC1/AKT3/H2BC12/H2BC12L/H3-3A/SRC/TLR4/H2BC4/MAPK11/PLCB3/H2BC5/H4C11/H4C3/H4C14/H2AC19/H2AC21/H4C12/H4C8/MAPK12/HMGB1/H2AC18/H4C1/H2AC13/H2BC21/PIK3R3/H3C10/H4C15/H4C2/H3C2/PIK3CD/SELPLG/H2AC20/H2AX/PLCB4/H2BC6/H2BC13/H3C14/H3C15/ACTB/FPR1/H2BC11/H3C1/H2AC11/H2AC15/H3C13/H2AC14/H2BC17/ACTG1/H2AC16/H3C3/H2BC18/H2AC12/H2BC3/H2BC1/H2AC4/H2AC1/H2BC14	60
146	downregulated.??-T3 vs VC	Downregulated	??-T3 vs VC	hsa05205	Proteoglycans in cancer	62/858	205/8163	2.84226e-15	4.49077e-13	2.99185e-13	RDX/AKT1/PLCG1/MSN/CTNNB1/MMP2/FGFR1/CAMK2D/FGF2/RRAS2/FLNA/AKT3/ERBB2/HPSE/ROCK2/FAS/CD44/FZD5/HIF1A/SRC/TLR4/GAB1/MAPK11/SMO/GPC1/FZD8/PXN/WNT9A/IGF1R/PLCE1/MAPK12/PTCH1/MYC/FZD7/SDC2/PIK3R3/SDC1/MET/FZD1/ITGA5/HSPG2/HBEGF/TGFB1/PIK3CD/FZD4/FZD2/TIMP3/ACTB/WNT5A/EZR/ANK1/WNT3/COL1A1/ACTG1/CAV2/CCND1/WNT7A/CAV1/WNT5B/WNT7B/THBS1/TGFB2	62
147	downregulated.??-T3 vs VC	Downregulated	??-T3 vs VC	hsa04390	Hippo signaling pathway	52/858	157/8163	8.75194e-15	9.21871e-13	6.14171e-13	YWHAZ/PALS1/BIRC5/BIRC2/CTNNB1/SCRIB/LIMD1/YAP1/AJUBA/FZD5/WWTR1/TEAD1/PPP2R1B/FZD8/NF2/WNT9A/MYC/FZD7/TCF7L2/BMPR2/FZD1/WTIP/TGFB1/FZD4/FZD2/AXIN2/TGFB3/ACTB/WNT5A/GLI2/TEAD4/TCF7L1/FRMD6/TEAD2/SMAD3/PPP2R2B/WNT3/ACTG1/WWC1/SNAI2/SERPINE1/CCND1/WNT7A/SMAD7/FGF1/WNT5B/WNT7B/NKD1/CCN2/TGFB2/ID1/BMP4	52
148	downregulated.??-T3 vs VC	Downregulated	??-T3 vs VC	hsa05034	Alcoholism	57/858	187/8163	2.69231e-14	1.81471e-12	1.209e-12	H2AC6/HDAC1/CALM2/H2BC12/H2BC12L/H3-3A/H2BC4/H2BC5/CALM3/H4C11/H4C3/H4C14/H2AC19/H2AC21/H4C12/H4C8/GNG11/H2AC18/H4C1/H2AC13/H2BC21/H3C10/H4C15/H4C2/H3C2/CAMK4/H2AC20/H2AX/H2BC6/H2BC13/H3C14/GNAI1/GRIN2D/H3C15/GNG2/SLC29A1/H2BC11/H3C1/H2AC11/PKIA/H2AC15/H3C13/H2AC14/H2BC17/CAMKK1/H2AC16/H3C3/BDNF/H2BC18/H2AC12/H2BC3/GRIN2A/H2BC1/CREB3L1/H2AC4/H2AC1/H2BC14	57
149	downregulated.??-T3 vs VC	Downregulated	??-T3 vs VC	hsa05322	Systemic lupus erythematosus	47/858	136/8163	2.87138e-14	1.81471e-12	1.209e-12	H2AC6/H2BC12/H2BC12L/H3-3A/H2BC4/ACTN1/H2BC5/TRIM21/H4C11/H4C3/H4C14/H2AC19/H2AC21/H4C12/H4C8/H2AC18/H4C1/H2AC13/H2BC21/H3C10/H4C15/H4C2/H3C2/H2AC20/H2AX/H2BC6/H2BC13/ACTN4/H3C14/H3C15/H2BC11/H3C1/H2AC11/H2AC15/H3C13/H2AC14/H2BC17/H2AC16/H3C3/H2BC18/H2AC12/H2BC3/GRIN2A/H2BC1/H2AC4/H2AC1/H2BC14	47
150	downregulated.??-T3 vs VC	Downregulated	??-T3 vs VC	hsa04015	Rap1 signaling pathway	58/858	210/8163	1.73883e-12	9.15784e-11	6.10116e-11	AKT1/PLCG1/CTNNB1/TLN2/FGFR1/MAGI1/GNAQ/VASP/FGF2/CALM2/EVL/AKT3/EFNA5/APBB1IP/SRC/LPAR1/SIPA1L2/RALB/MAPK11/ADCY9/PLCB3/CALM3/BCAR1/IGF1R/PLCE1/MAPK12/EPHA2/RASSF5/PIK3R3/ADCY3/ENAH/MET/MAGI3/PDGFA/EGF/PDGFB/PIK3CD/ANGPT1/PLCB4/GNAI1/ACTB/FGFR2/FPR1/PDGFC/PDGFRB/PDGFRA/CSF1/KITLG/ACTG1/FGF5/F2R/FGFR3/FGF1/GRIN2A/VEGFC/THBS1/ID1/LPAR4	58
151	downregulated.??-T3 vs VC	Downregulated	??-T3 vs VC	hsa04110	Cell cycle	40/858	126/8163	5.19155e-11	2.34362e-09	1.56137e-09	YWHAZ/TFDP1/PCNA/MCM3/BUB1B/CCNB2/MCM2/HDAC1/CDC20/CCNB1/GADD45B/CDKN2B/TFDP2/PTTG1/MYC/RBL1/CDK6/CDKN2C/CDC25A/TGFB1/CDC14A/SKP2/CDC25B/PLK1/ESPL1/WEE1/TGFB3/CCNA2/MCM5/CDC7/E2F1/CDK1/E2F2/PKMYT1/SMAD3/CDK2/SFN/CCND1/CCNE2/TGFB2	40
152	downregulated.??-T3 vs VC	Downregulated	??-T3 vs VC	hsa05226	Gastric cancer	43/858	149/8163	3.0744e-10	1.21439e-08	8.09052e-09	AKT1/CTNNB1/FGF2/LRP5/AKT3/ERBB2/GADD45B/FZD5/RXRA/GAB1/CDKN2B/FZD8/WNT9A/MYC/FZD7/TCF7L2/PIK3R3/MET/FZD1/TGFB1/EGF/PIK3CD/FZD4/FZD2/AXIN2/TGFB3/RARB/E2F1/FGFR2/E2F2/WNT5A/TCF7L1/SMAD3/WNT3/CDK2/FGF5/CCND1/WNT7A/CCNE2/FGF1/WNT5B/WNT7B/TGFB2	43
153	downregulated.??-T3 vs VC	Downregulated	??-T3 vs VC	hsa05203	Viral carcinogenesis	52/858	204/8163	6.28482e-10	2.20667e-08	1.47013e-08	YWHAZ/KAT2A/SCRIB/LYN/TRAF3/HDAC1/CDC20/TRAF2/H2BC12/H2BC12L/SRC/STAT5B/H2BC4/ACTN1/SRF/H2BC5/CDKN2B/PKM/H4C11/H4C3/H4C14/PXN/H4C12/KAT2B/H4C8/H4C1/GSN/H2BC21/RBL1/CDK6/PIK3R3/H4C15/H4C2/SKP2/PIK3CD/H2BC6/H2BC13/ACTN4/CCNA2/CCR3/CDK1/H2BC11/TRAF5/H2BC17/CDK2/CCND1/H2BC18/CCNE2/H2BC3/H2BC1/CREB3L1/H2BC14	52
154	downregulated.??-T3 vs VC	Downregulated	??-T3 vs VC	hsa04310	Wnt signaling pathway	45/858	170/8163	2.55035e-09	8.05912e-08	5.36917e-08	TBL1X/CTNNB1/ROR1/MAPK9/CAMK2D/LRP5/GPC4/ROCK2/FOSL1/CTNNBIP1/FZD5/PLCB3/FZD8/CCN4/WNT9A/MYC/FZD7/TCF7L2/FZD1/SFRP1/FZD4/TBL1XR1/FZD2/VANGL1/AXIN2/PLCB4/TLE3/BAMBI/CTNND2/WNT5A/DAAM2/TCF7L1/SMAD3/PRICKLE1/WNT3/APCDD1L/TLE4/CCND1/WNT7A/PRICKLE2/WNT5B/WNT7B/NKD1/LGR4/LGR5	45
155	downregulated.??-T3 vs VC	Downregulated	??-T3 vs VC	hsa05225	Hepatocellular carcinoma	44/858	168/8163	5.49473e-09	1.57849e-07	1.05162e-07	AKT1/PLCG1/CTNNB1/SMARCC2/ARID1A/SMARCA4/LRP5/AKT3/NQO1/GADD45B/FZD5/GAB1/FZD8/GSTM2/WNT9A/IGF1R/MYC/FZD7/CDK6/TCF7L2/PIK3R3/MET/FZD1/DPF1/TGFB1/PIK3CD/FZD4/FZD2/AXIN2/TGFB3/GSTA4/ACTB/E2F1/E2F2/WNT5A/TCF7L1/SMAD3/WNT3/ACTG1/CCND1/WNT7A/WNT5B/WNT7B/TGFB2	44
156	downregulated.??-T3 vs VC	Downregulated	??-T3 vs VC	hsa05217	Basal cell carcinoma	24/858	63/8163	6.86663e-09	1.80821e-07	1.20467e-07	CTNNB1/SUFU/GADD45B/FZD5/SMO/FZD8/WNT9A/GLI3/PTCH1/FZD7/TCF7L2/FZD1/FZD4/FZD2/AXIN2/WNT5A/GLI2/TCF7L1/WNT3/WNT7A/WNT5B/WNT7B/HHIP/BMP4	24
157	downregulated.??-T3 vs VC	Downregulated	??-T3 vs VC	hsa04510	Focal adhesion	49/858	201/8163	9.81504e-09	2.38581e-07	1.58948e-07	AKT1/BIRC2/CTNNB1/TLN2/LAMB1/PIP5K1C/MAPK9/VASP/MYL9/FLNA/AKT3/ERBB2/ROCK2/CAPN2/SRC/ITGA6/LAMC1/ACTN1/BCAR1/PXN/IGF1R/ZYX/PIK3R3/ITGA7/MET/ITGA5/PDGFA/EGF/COL4A2/PDGFB/PIK3CD/ACTN4/ACTB/MYLK/LAMA5/VCL/PDGFC/COL4A5/PDGFRB/PDGFRA/COL1A1/ACTG1/CAV2/CCND1/COL4A1/CAV1/VEGFC/THBS1/ITGB8	49
158	downregulated.??-T3 vs VC	Downregulated	??-T3 vs VC	hsa04550	Signaling pathways regulating pluripotency of stem cells	38/858	143/8163	4.01581e-08	9.06426e-07	6.03882e-07	AKT1/CTNNB1/FGFR1/FGF2/AKT3/SKIL/FZD5/MAPK11/FZD8/WNT9A/IGF1R/MAPK12/MYC/FZD7/PIK3R3/TBX3/BMPR2/FZD1/PIK3CD/LIFR/PAX6/FZD4/FZD2/AXIN2/FGFR2/WNT5A/SMAD3/WNT3/SMAD9/WNT7A/FGFR3/ID3/WNT5B/WNT7B/ID1/DLX5/INHBA/BMP4	38
159	downregulated.??-T3 vs VC	Downregulated	??-T3 vs VC	hsa04810	Regulation of actin cytoskeleton	50/858	218/8163	5.82662e-08	1.22748e-06	8.17772e-07	CFL1/RDX/MSN/SSH2/FGFR1/ARPC5/IQGAP3/PIP5K1C/ACTR3/FGF2/PIP4K2B/MYL9/RRAS2/ROCK2/SRC/ITGA6/LPAR1/ACTN1/BCAR1/BAIAP2/PXN/GSN/LIMK2/PIK3R3/ITGA7/ENAH/ITGA5/PDGFA/MYH9/EGF/PDGFB/PIK3CD/ACTN4/ACTB/MYLK/ACTR3C/FGFR2/VCL/PDGFC/EZR/PDGFRB/PDGFRA/ACTG1/FGF5/F2R/FGFR3/FGF1/BDKRB1/ITGB8/LPAR4	50
160	downregulated.??-T3 vs VC	Downregulated	??-T3 vs VC	hsa04520	Adherens junction	24/858	71/8163	1.01813e-07	2.01081e-06	1.33965e-06	CTNNB1/FGFR1/PTPRF/ERBB2/NECTIN3/SRC/ACTN1/SNAI1/SORBS1/PTPRB/BAIAP2/IGF1R/TCF7L2/MET/NECTIN1/ACTN4/ACTB/VCL/TCF7L1/SMAD3/ACTG1/SNAI2/PTPRJ/LMO7	24
161	downregulated.??-T3 vs VC	Downregulated	??-T3 vs VC	hsa05222	Small cell lung cancer	28/858	92/8163	1.14977e-07	2.13722e-06	1.42386e-06	AKT1/BIRC2/LAMB1/TRAF3/AKT3/TRAF2/GADD45B/RXRA/ITGA6/LAMC1/CDKN2B/MYC/CDK6/PIK3R3/SKP2/COL4A2/PIK3CD/RARB/E2F1/LAMA5/E2F2/TRAF5/COL4A5/CDK2/NOS2/CCND1/CCNE2/COL4A1	28
162	downregulated.??-T3 vs VC	Downregulated	??-T3 vs VC	hsa05224	Breast cancer	37/858	147/8163	2.74019e-07	4.81056e-06	3.20491e-06	AKT1/CTNNB1/FGFR1/FGF2/LRP5/AKT3/ERBB2/GADD45B/FZD5/FZD8/WNT9A/IGF1R/MYC/FZD7/NOTCH1/CDK6/TCF7L2/PIK3R3/FZD1/EGF/HES1/PIK3CD/FZD4/FZD2/AXIN2/E2F1/E2F2/NOTCH3/WNT5A/TCF7L1/WNT3/FGF5/CCND1/WNT7A/FGF1/WNT5B/WNT7B	37
163	downregulated.??-T3 vs VC	Downregulated	??-T3 vs VC	hsa04218	Cellular senescence	38/858	156/8163	4.66585e-07	7.76004e-06	5.16991e-06	AKT1/HIPK2/CCNB2/RRAS2/CALM2/AKT3/CCNB1/GADD45B/CAPN2/CAPN1/MAPK11/CALM3/CDKN2B/FOXM1/MCU/ZFP36L1/MAPK12/RASSF5/MYC/RBL1/CDK6/PIK3R3/CDC25A/TGFB1/PIK3CD/IGFBP3/MYBL2/TGFB3/CCNA2/E2F1/CDK1/E2F2/SMAD3/CDK2/SERPINE1/CCND1/CCNE2/TGFB2	38
164	downregulated.??-T3 vs VC	Downregulated	??-T3 vs VC	hsa04530	Tight junction	40/858	169/8163	5.25245e-07	8.29887e-06	5.5289e-06	AMOTL1/RDX/PCNA/PALS1/MSN/PRKAG2/SCRIB/MICALL2/ARPC5/MAPK9/MAGI1/VASP/MYL6/ACTR3/MYL9/ERBB2/ROCK2/SRC/PPP2R1B/MAP3K1/ACTN1/TJP2/NF2/TUBA4A/RUNX1/TUBA1C/MYH9/CGN/TUBA1A/AMOTL2/MPP4/ACTN4/ACTB/ACTR3C/CGNL1/EZR/PPP2R2B/ACTG1/SYNPO/CCND1	40
165	downregulated.??-T3 vs VC	Downregulated	??-T3 vs VC	hsa04350	TGF-beta signaling pathway	27/858	94/8163	7.0618e-07	1.06263e-05	7.0795e-06	TFDP1/NBL1/FBN1/PPP2R1B/NEO1/TGIF2/CDKN2B/RGMB/MYC/RBL1/BMPR2/SMURF2/TGFB1/TGFB3/BAMBI/SMAD3/FST/PITX2/SMAD9/SMAD7/SMAD6/ID3/THBS1/TGFB2/ID1/INHBA/BMP4	27
166	downregulated.??-T3 vs VC	Downregulated	??-T3 vs VC	hsa04151	PI3K-Akt signaling pathway	67/858	354/8163	9.00075e-07	1.29284e-05	8.61316e-06	YWHAZ/AKT1/LAMB1/FGFR1/MAGI1/PHLPP1/FGF2/AKT3/GYS1/ERBB2/PHLPP2/EFNA5/RXRA/ITGA6/LPAR1/PPP2R1B/TLR4/LAMC1/IL4R/IGF1R/GNG11/EPHA2/MYC/PPP2R5D/SGK1/CDK6/PIK3R3/ITGA7/MET/ITGA5/PDGFA/EGF/COL4A2/PDGFB/PIK3CD/ANGPT1/PKN3/GNG2/LAMA5/FGFR2/PDGFC/COL4A5/PDGFRB/PDGFRA/NTF3/CSF1/PPP2R2B/KITLG/CDK2/COL1A1/FGF5/F2R/CCND1/BDNF/CCNE2/IRS1/COL4A1/FGFR3/FGF1/IL7R/VEGFC/CREB3L1/THBS1/NTF4/ITGB8/LPAR4/MYB	67
167	downregulated.??-T3 vs VC	Downregulated	??-T3 vs VC	hsa04916	Melanogenesis	28/858	101/8163	9.75972e-07	1.3409e-05	8.93338e-06	CTNNB1/GNAQ/CAMK2D/CALM2/FZD5/ADCY9/PLCB3/CALM3/FZD8/WNT9A/FZD7/TCF7L2/ADCY3/FZD1/MITF/FZD4/FZD2/PLCB4/GNAI1/WNT5A/TCF7L1/KITLG/WNT3/WNT7A/WNT5B/WNT7B/CREB3L1/EDN1	28
168	downregulated.??-T3 vs VC	Downregulated	??-T3 vs VC	hsa04360	Axon guidance	41/858	182/8163	1.51362e-06	1.99293e-05	1.32774e-05	CFL1/NTN4/PLCG1/SRGAP1/SSH2/ROBO1/CAMK2D/MYL9/NRP1/ROCK2/EFNB1/BOC/PLXNB1/EFNA5/SRC/SEMA3F/NEO1/SMO/PLXNA1/SEMA4F/PLXNA2/EPHB2/ABLIM1/EPHA2/PTCH1/LIMK2/PIK3R3/BMPR2/ENAH/MET/PIK3CD/GNAI1/TRPC4/EFNB2/WNT5A/EPHB6/SEMA3C/SEMA7A/WNT5B/PLXNA4/UNC5C	41
169	downregulated.??-T3 vs VC	Downregulated	??-T3 vs VC	hsa05218	Melanoma	22/858	72/8163	2.42995e-06	3.07146e-05	2.04628e-05	AKT1/FGFR1/FGF2/AKT3/GADD45B/IGF1R/CDK6/PIK3R3/MET/PDGFA/EGF/PDGFB/MITF/PIK3CD/E2F1/E2F2/PDGFC/PDGFRB/PDGFRA/FGF5/CCND1/FGF1	22
170	downregulated.??-T3 vs VC	Downregulated	??-T3 vs VC	hsa04933	AGE-RAGE signaling pathway in diabetic complications	27/858	100/8163	2.66278e-06	3.2363e-05	2.1561e-05	AKT1/PLCG1/MMP2/MAPK9/AKT3/STAT5B/MAPK11/PLCB3/PLCE1/MAPK12/PIK3R3/TGFB1/COL4A2/PIK3CD/PLCD3/TGFB3/PLCB4/COL4A5/SMAD3/COL1A1/SERPINE1/CCND1/COL4A1/VEGFC/TGFB2/F3/EDN1	27
171	downregulated.??-T3 vs VC	Downregulated	??-T3 vs VC	hsa04010	MAPK signaling pathway	57/858	294/8163	2.76561e-06	3.23679e-05	2.15642e-05	MAP4K4/AKT1/CACNA1A/MYD88/MAPKAPK3/FGFR1/MAPK9/FGF2/RRAS2/FLNA/AKT3/TRAF2/HSPA8/ARRB1/ERBB2/MAP3K20/FAS/GADD45B/EFNA5/MAPK11/MAP3K1/SRF/CACNA2D1/RPS6KA4/CACNA1C/IGF1R/MAPK12/EPHA2/MAP3K14/MYC/MET/HSPB1/PDGFA/TGFB1/EGF/PDGFB/CDC25B/ANGPT1/CACNB3/STMN1/RPS6KA1/TGFB3/MECOM/FGFR2/PDGFC/PDGFRB/PDGFRA/NTF3/CSF1/KITLG/FGF5/BDNF/FGFR3/FGF1/VEGFC/TGFB2/NTF4	57
172	downregulated.??-T3 vs VC	Downregulated	??-T3 vs VC	hsa05131	Shigellosis	49/858	247/8163	7.24476e-06	8.17623e-05	5.44719e-05	AKT1/PLCG1/TLN2/MYD88/ARPC5/MAPK9/SEPTIN11/ACTR3/MYL9/AKT3/TRAF2/ROCK2/FNBP1L/CD44/CAPN2/SEPTIN8/H3-3A/SRC/CAPN1/TLR4/MAPK11/ACTN1/PLCB3/BCAR1/CYTH3/PXN/PLCE1/MAPK12/MALT1/PRKCQ/PIK3R3/H3C10/ITGA5/H3C2/PIK3CD/NLRP3/PLCD3/PLCB4/ACTN4/H3C14/H3C15/ACTB/ACTR3C/VCL/H3C1/TRAF5/H3C13/ACTG1/H3C3	49
173	downregulated.??-T3 vs VC	Downregulated	??-T3 vs VC	hsa01521	EGFR tyrosine kinase inhibitor resistance	22/858	79/8163	1.29975e-05	0.000141628	9.43557e-05	AKT1/PLCG1/FGF2/AKT3/ERBB2/AXL/SRC/GAB1/IGF1R/PIK3R3/MET/PDGFA/EGF/PDGFB/PIK3CD/GAS6/FGFR2/PDGFC/PDGFRB/PDGFRA/FGFR3/NRG1	22
174	downregulated.??-T3 vs VC	Downregulated	??-T3 vs VC	hsa05165	Human papillomavirus infection	60/858	331/8163	1.39286e-05	0.000146715	9.77445e-05	AKT1/PALS1/CTNNB1/SCRIB/LAMB1/MAGI1/TRAF3/HDAC1/AKT3/FAS/FZD5/ITGA6/PPP2R1B/LAMC1/PKM/FZD8/HES4/PXN/WNT9A/FZD7/PPP2R5D/NOTCH1/RBL1/CDK6/TCF7L2/PIK3R3/ITGA7/FZD1/ITGA5/TCIRG1/EGF/COL4A2/HES1/MAML2/PIK3CD/FZD4/FZD2/AXIN2/CCNA2/E2F1/LAMA5/NOTCH3/WNT5A/COL4A5/TCF7L1/PDGFRB/PPP2R2B/WNT3/CDK2/COL1A1/CCND1/WNT7A/CCNE2/COL4A1/WNT5B/WNT7B/CREB3L1/LFNG/THBS1/ITGB8	60
175	downregulated.??-T3 vs VC	Downregulated	??-T3 vs VC	hsa05215	Prostate cancer	25/858	97/8163	1.51055e-05	0.000153979	0.000102584	AKT1/CTNNB1/FGFR1/AKT3/ERBB2/IGF1R/TCF7L2/PIK3R3/PDGFA/EGF/PDGFB/PIK3CD/PLAT/E2F1/FGFR2/E2F2/PDGFC/TCF7L1/PDGFRB/PDGFRA/NKX3-1/CDK2/CCND1/CCNE2/CREB3L1	25
176	downregulated.??-T3 vs VC	Downregulated	??-T3 vs VC	hsa04392	Hippo signaling pathway - multiple species	12/858	29/8163	1.60213e-05	0.000158211	0.000105403	LIMD1/YAP1/AJUBA/WWTR1/TEAD1/NF2/FAT4/WTIP/TEAD4/FRMD6/TEAD2/WWC1	12
177	downregulated.??-T3 vs VC	Downregulated	??-T3 vs VC	hsa04934	Cushing syndrome	34/858	155/8163	2.14855e-05	0.00020574	0.000137069	CTNNB1/ORAI1/GNAQ/CAMK2D/FZD5/ADCY9/PLCB3/CDKN2B/FZD8/WNT9A/CACNA1C/FZD7/CDK6/CDKN2C/TCF7L2/ADCY3/FZD1/FZD4/FZD2/AXIN2/PLCB4/GNAI1/E2F1/E2F2/WNT5A/TCF7L1/WNT3/CDK2/CCND1/WNT7A/CCNE2/WNT5B/WNT7B/CREB3L1	34
178	downregulated.??-T3 vs VC	Downregulated	??-T3 vs VC	hsa04540	Gap junction	23/858	88/8163	2.57903e-05	0.000239698	0.000159692	TUBB2A/GNAQ/SRC/LPAR1/TUBB/ADCY9/PLCB3/TUBA4A/GJA1/TUBA1C/TUBB3/ADCY3/PDGFA/TUBA1A/TUBB6/EGF/PDGFB/PLCB4/GNAI1/CDK1/PDGFC/PDGFRB/PDGFRA	23
179	downregulated.??-T3 vs VC	Downregulated	??-T3 vs VC	hsa05100	Bacterial invasion of epithelial cells	21/858	77/8163	2.87974e-05	0.000259999	0.000173217	CTNNB1/CD2AP/ARPC5/SEPTIN11/ACTR3/SEPTIN8/SRC/GAB1/BCAR1/PXN/PIK3R3/MET/ITGA5/PIK3CD/ACTB/ACTR3C/VCL/ARHGEF26/ACTG1/CAV2/CAV1	21
180	downregulated.??-T3 vs VC	Downregulated	??-T3 vs VC	hsa04020	Calcium signaling pathway	46/858	240/8163	3.4441e-05	0.000302316	0.000201409	PLCG1/CACNA1A/ORAI1/FGFR1/GNAQ/CAMK2D/FGF2/CALM2/ERBB2/ADCY9/PLCB3/CALM3/HRH1/MCU/CACNA1C/PLCE1/ITPKB/ADCY3/MET/PDGFA/EGF/PDGFB/CAMK4/PLCD3/PLCB4/GRIN2D/MYLK/FGFR2/PDGFC/PDE1C/PDGFRB/PDGFRA/TBXA2R/FGF5/ATP2B4/PTGFR/F2R/NOS2/FGFR3/OXTR/ADRA1D/FGF1/GRIN2A/VEGFC/ADRB2/BDKRB1	46
181	downregulated.??-T3 vs VC	Downregulated	??-T3 vs VC	hsa04919	Thyroid hormone signaling pathway	28/858	121/8163	4.11747e-05	0.000351654	0.00023428	AKT1/PLCG1/TBC1D4/PFKP/CTNNB1/KAT2A/HDAC1/AKT3/HIF1A/RXRA/SRC/PLCB3/PLCE1/KAT2B/MYC/NOTCH1/THRA/ATP1B1/PIK3R3/PIK3CD/PLCD3/PLCB4/ACTB/NOTCH3/ACTG1/CCND1/DIO2/BMP4	28
182	downregulated.??-T3 vs VC	Downregulated	??-T3 vs VC	hsa05214	Glioma	20/858	75/8163	6.30173e-05	0.000524039	0.000349127	AKT1/PLCG1/CAMK2D/CALM2/AKT3/GADD45B/CALM3/IGF1R/CDK6/PIK3R3/PDGFA/EGF/PDGFB/CAMK4/PIK3CD/E2F1/E2F2/PDGFRB/PDGFRA/CCND1	20
183	downregulated.??-T3 vs VC	Downregulated	??-T3 vs VC	hsa05212	Pancreatic cancer	20/858	76/8163	7.72387e-05	0.000625832	0.000416943	AKT1/RALBP1/MAPK9/AKT3/ERBB2/GADD45B/RALB/PLD2/CDK6/PIK3R3/RAD51/TGFB1/EGF/PIK3CD/TGFB3/E2F1/E2F2/SMAD3/CCND1/TGFB2	20
184	downregulated.??-T3 vs VC	Downregulated	??-T3 vs VC	hsa04014	Ras signaling pathway	44/858	235/8163	9.03558e-05	0.000706869	0.000470932	AKT1/PLCG1/RALBP1/FGFR1/MAPK9/FGF2/RRAS2/CALM2/AKT3/EFNA5/RALB/GAB1/CALM3/IGF1R/PLCE1/GNG11/EPHA2/RASSF5/PLD2/PIK3R3/RIN1/MET/PDGFA/ETS2/EGF/PDGFB/PIK3CD/ANGPT1/GNG2/FGFR2/PDGFC/PDGFRB/PDGFRA/NTF3/CSF1/KITLG/FGF5/KSR2/BDNF/FGFR3/FGF1/GRIN2A/VEGFC/NTF4	44
185	downregulated.??-T3 vs VC	Downregulated	??-T3 vs VC	hsa04024	cAMP signaling pathway	42/858	221/8163	9.1714e-05	0.000706869	0.000470932	AKT1/ORAI1/MAPK9/GABBR1/CAMK2D/MYL9/RRAS2/CALM2/AKT3/ROCK2/ADCY9/CALM3/CACNA1C/PLCE1/GLI3/PTCH1/PLD2/ATP1B1/PIK3R3/ADCY3/PDE4A/GRIA3/CAMK4/PIK3CD/SSTR2/GNAI1/HTR1D/GRIN2D/ADORA1/SOX9/HCN4/ADCYAP1/HCAR1/ATP2B4/F2R/BDNF/OXTR/GRIN2A/CREB3L1/HHIP/ADRB2/EDN1	42
186	downregulated.??-T3 vs VC	Downregulated	??-T3 vs VC	hsa04068	FoxO signaling pathway	28/858	131/8163	0.000179934	0.00135379	0.000901925	AKT1/PRKAG2/CCNB2/MAPK9/AKT3/CCNB1/GADD45B/MAPK11/CDKN2B/PLK4/IGF1R/MAPK12/SGK1/PIK3R3/TGFB1/SKP2/EGF/PIK3CD/PLK1/TGFB3/S1PR1/SMAD3/CDK2/CCND1/IRS1/PLK2/IL7R/TGFB2	28
187	downregulated.??-T3 vs VC	Downregulated	??-T3 vs VC	hsa05202	Transcriptional misregulation in cancer	37/858	193/8163	0.000197244	0.00144952	0.0009657	FUS/BIRC2/RARA/NSD2/HDAC1/FUT8/GADD45B/H3-3A/RXRA/HOXA10/RUNX1/SIX1/IGF1R/SSX2B/MYC/SSX2/CDKN2C/MET/H3C10/PDGFA/GRIA3/SLC45A3/H3C2/MITF/FLI1/IGFBP3/MAF/PLAT/H3C14/CCNA2/RUNX2/H3C15/H3C1/HMGA2/H3C13/PBX3/H3C3	37
188	downregulated.??-T3 vs VC	Downregulated	??-T3 vs VC	hsa05418	Fluid shear stress and atherosclerosis	29/858	139/8163	0.00021613	0.00155221	0.00103412	AKT1/CTNNB1/MMP2/MAPK9/CALM2/AKT3/NQO1/SRC/MAPK11/CALM3/GPC1/SUMO3/GSTM2/MAPK12/SDC2/PIK3R3/SDC1/BMPR2/PDGFA/PDGFB/PIK3CD/PLAT/GSTA4/ACTB/ACTG1/CAV2/CAV1/BMP4/EDN1	29
189	downregulated.??-T3 vs VC	Downregulated	??-T3 vs VC	hsa05230	Central carbon metabolism in cancer	18/858	70/8163	0.000239107	0.00167906	0.00111863	AKT1/PFKP/FGFR1/AKT3/G6PD/ERBB2/HIF1A/SLC16A3/PKM/MYC/PIK3R3/MET/PIK3CD/FGFR2/PDGFRB/PDGFRA/GLS/FGFR3	18
190	downregulated.??-T3 vs VC	Downregulated	??-T3 vs VC	hsa04926	Relaxin signaling pathway	27/858	129/8163	0.000334045	0.00229474	0.00152881	AKT1/MMP2/MAPK9/AKT3/ARRB1/SRC/MAPK11/ADCY9/PLCB3/GNG11/MAPK12/PIK3R3/ADCY3/TGFB1/COL4A2/PIK3CD/PLCB4/GNAI1/GNG2/ACTA2/COL4A5/COL1A1/NOS2/COL4A1/VEGFC/CREB3L1/EDN1	27
191	downregulated.??-T3 vs VC	Downregulated	??-T3 vs VC	hsa05223	Non-small cell lung cancer	18/858	72/8163	0.00034884	0.00234539	0.00156255	AKT1/PLCG1/EML4/AKT3/ERBB2/GADD45B/RXRA/STAT5B/RASSF5/CDK6/PIK3R3/MET/EGF/PIK3CD/RARB/E2F1/E2F2/CCND1	18
192	downregulated.??-T3 vs VC	Downregulated	??-T3 vs VC	hsa04666	Fc gamma R-mediated phagocytosis	22/858	97/8163	0.000362749	0.00238809	0.001591	CFL1/AKT1/PLCG1/ASAP2/LYN/ARPC5/PIP5K1C/VASP/ACTR3/AKT3/ASAP3/ASAP1/PLD2/GSN/LIMK2/PIK3R3/MYO10/PIK3CD/AMPH/ACTR3C/MARCKS/PLPP3	22
193	downregulated.??-T3 vs VC	Downregulated	??-T3 vs VC	hsa04611	Platelet activation	26/858	124/8163	0.000415338	0.00267851	0.00178448	AKT1/ORAI1/TLN2/LYN/GNAQ/VASP/AKT3/ROCK2/APBB1IP/SRC/MAPK11/ADCY9/PLCB3/TBXAS1/MAPK12/PIK3R3/ADCY3/PIK3CD/PLCB4/GNAI1/ACTB/MYLK/TBXA2R/COL1A1/ACTG1/F2R	26
194	downregulated.??-T3 vs VC	Downregulated	??-T3 vs VC	hsa00534	Glycosaminoglycan biosynthesis - heparan sulfate / heparin	9/858	24/8163	0.000455604	0.00287942	0.00191833	EXT1/GLCE/XYLT2/EXTL3/NDST1/HS6ST1/XYLT1/EXTL1/HS3ST1	9
195	downregulated.??-T3 vs VC	Downregulated	??-T3 vs VC	hsa00100	Steroid biosynthesis	8/858	20/8163	0.000572236	0.00354562	0.00236217	NSDHL/LSS/DHCR24/CYP51A1/LBR/FDFT1/EBP/MSMO1	8
196	downregulated.??-T3 vs VC	Downregulated	??-T3 vs VC	hsa04072	Phospholipase D signaling pathway	29/858	148/8163	0.000649299	0.00394574	0.00262874	AKT1/PLCG1/DGKZ/PIP5K1C/RRAS2/AKT3/DGKH/LPAR1/RALB/GAB1/ADCY9/PLCB3/CYTH3/PLD2/PIK3R3/ADCY3/PDGFA/EGF/PDGFB/PIK3CD/PLCB4/PDGFC/PDGFRB/PDGFRA/KITLG/PTGFR/F2R/PLPP3/LPAR4	29
197	downregulated.??-T3 vs VC	Downregulated	??-T3 vs VC	hsa05220	Chronic myeloid leukemia	18/858	76/8163	0.000704155	0.00419836	0.00279704	AKT1/HDAC1/AKT3/GADD45B/STAT5B/RUNX1/MYC/CDK6/PIK3R3/TGFB1/PIK3CD/TGFB3/MECOM/E2F1/E2F2/SMAD3/CCND1/TGFB2	18
198	downregulated.??-T3 vs VC	Downregulated	??-T3 vs VC	hsa05219	Bladder cancer	12/858	41/8163	0.000741292	0.00433793	0.00289003	MMP2/ERBB2/SRC/MYC/DAPK1/HBEGF/EGF/E2F1/E2F2/CCND1/FGFR3/THBS1	12
199	downregulated.??-T3 vs VC	Downregulated	??-T3 vs VC	hsa05146	Amoebiasis	22/858	102/8163	0.000755347	0.00433981	0.00289128	LAMB1/GNAQ/TLR4/LAMC1/ACTN1/PLCB3/PIK3R3/HSPB1/TGFB1/COL4A2/PIK3CD/TGFB3/PLCB4/ACTN4/LAMA5/RAB7B/VCL/COL4A5/COL1A1/NOS2/COL4A1/TGFB2	22
200	downregulated.??-T3 vs VC	Downregulated	??-T3 vs VC	hsa05410	Hypertrophic cardiomyopathy	20/858	90/8163	0.000870926	0.00491451	0.00327416	PRKAG2/DMD/ITGA6/TPM4/CACNA2D1/CACNA1C/ITGA7/ITGA5/TGFB1/LMNA/CACNB3/TGFB3/TPM2/ACTB/DES/ACTG1/TPM1/TGFB2/ITGB8/EDN1	20
201	downregulated.??-T3 vs VC	Downregulated	??-T3 vs VC	hsa01522	Endocrine resistance	21/858	98/8163	0.00107856	0.00597939	0.00398361	AKT1/MMP2/MAPK9/CARM1/AKT3/ERBB2/SRC/MAPK11/ADCY9/IGF1R/MAPK12/NOTCH1/CDKN2C/PIK3R3/ADCY3/HBEGF/PIK3CD/E2F1/E2F2/NOTCH3/CCND1	21
202	downregulated.??-T3 vs VC	Downregulated	??-T3 vs VC	hsa04115	p53 signaling pathway	17/858	73/8163	0.00120105	0.00654363	0.00435951	CCNB2/CCNB1/FAS/GADD45B/SESN3/TP53I3/GTSE1/CDK6/IGFBP3/CDK1/RRM2/CDK2/SFN/SERPINE1/CCND1/CCNE2/THBS1	17
203	downregulated.??-T3 vs VC	Downregulated	??-T3 vs VC	hsa05210	Colorectal cancer	19/858	86/8163	0.00125068	0.00669855	0.00446273	AKT1/BIRC5/CTNNB1/MAPK9/AKT3/GADD45B/RALB/MYC/TCF7L2/PIK3R3/TGFB1/EGF/PIK3CD/AXIN2/TGFB3/TCF7L1/SMAD3/CCND1/TGFB2	19
204	downregulated.??-T3 vs VC	Downregulated	??-T3 vs VC	hsa04935	Growth hormone synthesis, secretion and action	24/858	120/8163	0.00137245	0.00722826	0.00481563	AKT1/PLCG1/MAPK9/GNAQ/AKT3/STAT5B/MAPK11/MAP3K1/ADCY9/PLCB3/BCAR1/CACNA1C/MAPK12/SOCS2/PIK3R3/ADCY3/PIK3CD/IGFBP3/PLCB4/SSTR2/GNAI1/SOCS3/IRS1/CREB3L1	24
205	downregulated.??-T3 vs VC	Downregulated	??-T3 vs VC	hsa04914	Progesterone-mediated oocyte maturation	21/858	102/8163	0.00183644	0.00935992	0.00623579	AKT1/CCNB2/MAPK9/AKT3/CCNB1/MAPK11/ADCY9/IGF1R/MAPK12/PIK3R3/ADCY3/CDC25A/PIK3CD/CDC25B/PLK1/RPS6KA1/GNAI1/CCNA2/CDK1/PKMYT1/CDK2	21
206	downregulated.??-T3 vs VC	Downregulated	??-T3 vs VC	hsa05142	Chagas disease	21/858	102/8163	0.00183644	0.00935992	0.00623579	AKT1/MYD88/MAPK9/GNAQ/AKT3/FAS/PPP2R1B/TLR4/MAPK11/PLCB3/MAPK12/PIK3R3/TGFB1/PIK3CD/TGFB3/PLCB4/GNAI1/PPP2R2B/SERPINE1/NOS2/TGFB2	21
207	downregulated.??-T3 vs VC	Downregulated	??-T3 vs VC	hsa05135	Yersinia infection	26/858	137/8163	0.00195634	0.00981276	0.00653748	AKT1/PLCG1/MYD88/ARPC5/PIP5K1C/MAPK9/GNAQ/ACTR3/AKT3/TRAF2/ROCK2/SRC/TLR4/MAPK11/BCAR1/BAIAP2/PXN/MAPK12/PIK3R3/ITGA5/PIK3CD/NLRP3/RPS6KA1/ACTB/ACTR3C/ACTG1	26
208	downregulated.??-T3 vs VC	Downregulated	??-T3 vs VC	hsa05414	Dilated cardiomyopathy	20/858	96/8163	0.00201223	0.00993538	0.00661918	DMD/ITGA6/TPM4/ADCY9/CACNA2D1/CACNA1C/ITGA7/ADCY3/ITGA5/TGFB1/LMNA/CACNB3/TGFB3/TPM2/ACTB/DES/ACTG1/TPM1/TGFB2/ITGB8	20
209	downregulated.??-T3 vs VC	Downregulated	??-T3 vs VC	hsa04217	Necroptosis	29/858	159/8163	0.00208886	0.010155	0.00676552	PPIA/BIRC2/PYGL/MAPK9/H2AC6/CAMK2D/TRAF2/FAS/CAPN2/STAT5B/CAPN1/TLR4/H2AC19/H2AC21/HMGB1/H2AC18/H2AC13/NLRP3/H2AC20/H2AX/GLUL/H2AC11/TRAF5/H2AC15/H2AC14/H2AC16/H2AC12/H2AC4/H2AC1	29
210	downregulated.??-T3 vs VC	Downregulated	??-T3 vs VC	hsa05412	Arrhythmogenic right ventricular cardiomyopathy	17/858	77/8163	0.00223065	0.0106674	0.00710686	CTNNB1/CDH2/DMD/ITGA6/CACNA2D1/CACNA1C/GJA1/TCF7L2/ITGA7/ITGA5/LMNA/CACNB3/ACTB/TCF7L1/DES/ACTG1/ITGB8	17
211	downregulated.??-T3 vs VC	Downregulated	??-T3 vs VC	hsa05132	Salmonella infection	41/858	249/8163	0.00226176	0.0106674	0.00710686	AKT1/BIRC2/FHOD1/CTNNB1/TUBB2A/MYD88/ARPC5/MAPK9/ACTR3/CSE1L/MYL9/FLNA/AKT3/TRAF2/ROCK2/TLR4/TUBB/MAPK11/CYTH3/TUBA4A/ANXA2/MAPK12/MYC/TUBA1C/TUBB3/TCF7L2/TUBA1A/TUBB6/PIK3CD/NLRP3/RHOB/ACTB/RHOJ/ACTR3C/RAB7B/PODXL/ARHGEF26/S100A10/TCF7L1/AHNAK/ACTG1	41
212	downregulated.??-T3 vs VC	Downregulated	??-T3 vs VC	hsa04750	Inflammatory mediator regulation of TRP channels	20/858	98/8163	0.00260221	0.0120926	0.00805637	PLCG1/MAPK9/GNAQ/CAMK2D/CALM2/SRC/MAPK11/ADCY9/PLCB3/CALM3/HRH1/MAPK12/PRKCQ/PIK3R3/ADCY3/ASIC1/PIK3CD/PLCB4/F2RL1/BDKRB1	20
213	downregulated.??-T3 vs VC	Downregulated	??-T3 vs VC	hsa05161	Hepatitis B	29/858	162/8163	0.00278822	0.0127693	0.00850717	YWHAZ/PCNA/AKT1/BIRC5/MYD88/MAPK9/TRAF3/AKT3/FAS/SRC/STAT5B/TLR4/MAPK11/MAP3K1/MAPK12/MYC/PIK3R3/HSPG2/TGFB1/PIK3CD/TGFB3/CCNA2/E2F1/E2F2/SMAD3/CDK2/CCNE2/CREB3L1/TGFB2	29
214	downregulated.??-T3 vs VC	Downregulated	??-T3 vs VC	hsa05166	Human T-cell leukemia virus 1 infection	37/858	222/8163	0.00293445	0.013247	0.00882542	AKT1/KAT2A/BUB1B/TLN2/CCNB2/MAPK9/CDC20/AKT3/NRP1/FOSL1/STAT5B/MAP3K1/ADCY9/SRF/CDKN2B/KAT2B/PTTG1/MAP3K14/MYC/CDKN2C/PIK3R3/ADCY3/ETS2/TGFB1/MSX2/PIK3CD/ESPL1/TGFB3/CCNA2/E2F1/E2F2/SMAD3/CDK2/CCND1/CCNE2/CREB3L1/TGFB2	37
215	downregulated.??-T3 vs VC	Downregulated	??-T3 vs VC	hsa04261	Adrenergic signaling in cardiomyocytes	27/858	150/8163	0.00354297	0.0157687	0.0105055	AKT1/GNAQ/CAMK2D/CALM2/AKT3/PPP2R1B/MAPK11/TPM4/ADCY9/PLCB3/CACNA2D1/CALM3/CACNA1C/MAPK12/PPP2R5D/ATP1B1/ADCY3/CACNB3/PLCB4/TPM2/GNAI1/PPP2R2B/ATP2B4/ADRA1D/TPM1/CREB3L1/ADRB2	27
216	downregulated.??-T3 vs VC	Downregulated	??-T3 vs VC	hsa04210	Apoptosis	25/858	136/8163	0.0036916	0.016202	0.0107942	CASP2/AKT1/BIRC5/BIRC2/MAPK9/AKT3/TRAF2/FAS/GADD45B/CAPN2/CAPN1/SPTAN1/TUBA4A/MAP3K14/TUBA1C/LMNB2/PIK3R3/CASP6/TUBA1A/LMNA/PIK3CD/LMNB1/ACTB/CTSC/ACTG1	25
217	downregulated.??-T3 vs VC	Downregulated	??-T3 vs VC	hsa04371	Apelin signaling pathway	25/858	139/8163	0.00495639	0.021455	0.0142938	AKT1/PRKAG2/GNAQ/RRAS2/CALM2/AKT3/ADCY9/PLCB3/CALM3/GNG11/ADCY3/CAMK4/PLCB4/PLAT/GNAI1/GNG2/MYLK/NOTCH3/ACTA2/SMAD3/SERPINE1/NOS2/CCND1/APLN/CCN2	25
218	downregulated.??-T3 vs VC	Downregulated	??-T3 vs VC	hsa04070	Phosphatidylinositol signaling system	19/858	97/8163	0.00528066	0.0225499	0.0150232	PLCG1/ITPK1/DGKZ/PIP5K1C/PIP4K2B/CALM2/SYNJ2/DGKH/PLCB3/CALM3/INPP5E/PLCE1/ITPKB/PIK3R3/INPP5A/PIK3CD/IMPA2/PLCD3/PLCB4	19
219	downregulated.??-T3 vs VC	Downregulated	??-T3 vs VC	hsa05231	Choline metabolism in cancer	19/858	98/8163	0.00592485	0.0248003	0.0165225	AKT1/PLCG1/DGKZ/PIP5K1C/MAPK9/SLC44A2/AKT3/DGKH/HIF1A/PLD2/PIK3R3/PDGFA/EGF/PDGFB/PIK3CD/PDGFC/PDGFRB/PDGFRA/PLPP3	19
220	downregulated.??-T3 vs VC	Downregulated	??-T3 vs VC	hsa05206	MicroRNAs in cancer	47/858	310/8163	0.00596463	0.0248003	0.0165225	KIF23/RDX/PLCG1/VIM/FOXP1/HDAC1/ERBB2/CD44/EFNA5/EZH2/DNMT3B/MYC/NOTCH1/CDK6/PIK3R3/BMPR2/FSCN1/MET/ITGA5/PDGFA/CDC25A/SLC45A3/PDGFB/PIK3CD/CDC25B/STMN1/TIMP3/BMF/RECK/E2F1/E2F2/NOTCH3/HMGA2/EZR/MARCKS/PDGFRB/PDGFRA/GLS/WNT3/CCND1/CCNE2/IRS1/FGFR3/TPM1/THBS1/TGFB2/SOX4	47
221	downregulated.??-T3 vs VC	Downregulated	??-T3 vs VC	hsa04270	Vascular smooth muscle contraction	24/858	134/8163	0.00615264	0.0250803	0.0167091	GNAQ/KCNMA1/MYL6/MYL9/CALM2/ROCK2/ADCY9/PLCB3/CALM3/CACNA1C/PRKCQ/ADM/RAMP1/ADCY3/MYH9/KCNMB1/PLCB4/MYLK/ACTA2/ACTG2/NPPB/CALD1/ADRA1D/EDN1	24
222	downregulated.??-T3 vs VC	Downregulated	??-T3 vs VC	hsa05213	Endometrial cancer	13/858	58/8163	0.00619071	0.0250803	0.0167091	AKT1/CTNNB1/AKT3/ERBB2/GADD45B/MYC/TCF7L2/PIK3R3/EGF/PIK3CD/AXIN2/TCF7L1/CCND1	13
223	downregulated.??-T3 vs VC	Downregulated	??-T3 vs VC	hsa04670	Leukocyte transendothelial migration	21/858	114/8163	0.00724318	0.0289727	0.0193023	PLCG1/MSN/CTNNB1/MMP2/VASP/MYL9/ROCK2/MAPK11/ACTN1/BCAR1/PXN/MAPK12/RASSF5/PIK3R3/PIK3CD/ACTN4/GNAI1/ACTB/VCL/EZR/ACTG1	21
224	downregulated.??-T3 vs VC	Downregulated	??-T3 vs VC	hsa05130	Pathogenic Escherichia coli infection	32/858	197/8163	0.00799902	0.0315961	0.02105	TUBB2A/MYD88/ARPC5/MAPK9/ACTR3/TRAF2/ROCK2/FAS/SRC/LPAR1/TLR4/TUBB/MAPK11/CYTH3/BAIAP2/TUBA4A/MYO1B/MAPK12/MYO1E/TUBA1C/TUBB3/MYO10/MYH9/TUBA1A/TUBB6/NLRP3/ACTB/ACTR3C/EZR/ACTG1/F2R/LPAR4	32
225	downregulated.??-T3 vs VC	Downregulated	??-T3 vs VC	hsa03460	Fanconi anemia pathway	12/858	54/8163	0.00898786	0.0350637	0.0233603	TELO2/FANCD2/RMI1/SLX4/BLM/FANCG/FANCA/FANCE/CENPX/RAD51/HES1/BRIP1	12
226	downregulated.??-T3 vs VC	Downregulated	??-T3 vs VC	hsa04114	Oocyte meiosis	23/858	131/8163	0.00919686	0.035357	0.0235556	YWHAZ/CCNB2/CAMK2D/CALM2/CDC20/CCNB1/PPP2R1B/MAPK11/ADCY9/CALM3/FBXO5/IGF1R/MAPK12/PTTG1/PPP2R5D/ADCY3/PLK1/ESPL1/RPS6KA1/CDK1/PKMYT1/CDK2/CCNE2	23
227	downregulated.??-T3 vs VC	Downregulated	??-T3 vs VC	hsa04512	ECM-receptor interaction	17/858	88/8163	0.0092868	0.035357	0.0235556	LAMB1/HMMR/CD44/ITGA6/LAMC1/SDC1/ITGA7/ITGA5/HSPG2/AGRN/COL4A2/LAMA5/COL4A5/COL1A1/COL4A1/THBS1/ITGB8	17
228	downregulated.??-T3 vs VC	Downregulated	??-T3 vs VC	hsa04728	Dopaminergic synapse	23/858	132/8163	0.0100677	0.0378736	0.0252322	AKT1/CACNA1A/MAPK9/GNAQ/CAMK2D/CALM2/AKT3/ARRB1/PPP2R1B/MAPK11/PLCB3/CALM3/CACNA1C/GNG11/MAPK12/PPP2R5D/GRIA3/PLCB4/GNAI1/GNG2/PPP2R2B/GRIN2A/CREB3L1	23
229	downregulated.??-T3 vs VC	Downregulated	??-T3 vs VC	hsa04213	Longevity regulating pathway - multiple species	13/858	62/8163	0.0110101	0.0409315	0.0272695	AKT1/PRKAG2/HDAC1/AKT3/HSPA8/ADCY9/IGF1R/PIK3R3/ADCY3/FOXA2/CRYAB/PIK3CD/IRS1	13
230	downregulated.??-T3 vs VC	Downregulated	??-T3 vs VC	hsa04924	Renin secretion	14/858	69/8163	0.0113812	0.0415885	0.0277072	ORAI1/GNAQ/KCNMA1/CALM2/PLCB3/CALM3/CACNA1C/PLCB4/GNAI1/ADORA1/PDE1C/ADCYAP1/ADRB2/EDN1	14
231	downregulated.??-T3 vs VC	Downregulated	??-T3 vs VC	hsa04150	mTOR signaling pathway	26/858	156/8163	0.011502	0.0415885	0.0277072	AKT1/TELO2/LRP5/AKT3/LPIN1/PRR5L/FZD5/CASTOR2/FZD8/WNT9A/IGF1R/FZD7/SGK1/PIK3R3/FZD1/SKP2/PIK3CD/FZD4/FZD2/RPS6KA1/WNT5A/WNT3/WNT7A/IRS1/WNT5B/WNT7B	26
232	downregulated.??-T3 vs VC	Downregulated	??-T3 vs VC	hsa04971	Gastric acid secretion	15/858	76/8163	0.0115816	0.0415885	0.0277072	GNAQ/CAMK2D/CALM2/ADCY9/PLCB3/CALM3/ATP1B1/ADCY3/PLCB4/SSTR2/GNAI1/ACTB/MYLK/EZR/ACTG1	15
233	downregulated.??-T3 vs VC	Downregulated	??-T3 vs VC	hsa04668	TNF signaling pathway	20/858	112/8163	0.0121313	0.0430728	0.0286961	AKT1/BIRC2/MAPK9/TRAF3/AKT3/TRAF2/FAS/MAPK11/RPS6KA4/MAPK12/MAP3K14/PIK3R3/PIK3CD/TRAF5/SOCS3/CSF1/BCL3/VEGFC/CREB3L1/EDN1	20
234	downregulated.??-T3 vs VC	Downregulated	??-T3 vs VC	hsa04917	Prolactin signaling pathway	14/858	70/8163	0.0128947	0.0452748	0.0301631	AKT1/MAPK9/SOCS5/AKT3/SRC/STAT5B/MAPK11/SOCS6/MAPK12/SOCS2/PIK3R3/PIK3CD/SOCS3/CCND1	14
235	downregulated.??-T3 vs VC	Downregulated	??-T3 vs VC	hsa04152	AMPK signaling pathway	21/858	121/8163	0.014132	0.0490738	0.0326941	HMGCR/AKT1/PFKP/SCD/PRKAG2/AKT3/GYS1/PPP2R1B/PFKFB3/IGF1R/FASN/TBC1D1/PPP2R5D/PIK3R3/PIK3CD/CCNA2/SCD5/PPP2R2B/CCND1/IRS1/CREB3L1	21
236	upregulated.Antt vs VC	Upregulated	Antt vs VC	hsa04141	Protein processing in endoplasmic reticulum	24/370	171/8163	6.79996e-07	0.000203999	0.000198272	HERPUD1/DDIT3/HSPA5/MAN1C1/EIF2AK3/ERN1/HYOU1/SYVN1/ATF6/DNAJC10/RNF185/SAR1B/P4HB/ERLEC1/SEL1L/UBXN8/SEC24A/SELENOS/DNAJC3/SEC63/ATF4/DERL1/SEC24D/DNAJC1	24
237	upregulated.Antt vs VC	Upregulated	Antt vs VC	hsa05168	Herpes simplex virus 1 infection	46/370	495/8163	2.04094e-06	0.000306141	0.000297547	ZNF177/TLR3/ZNF222/IFIH1/ZNF10/ZFP37/ZNF550/EIF2AK3/ZNF81/ZNF432/ZNF587/ZNF140/ZNF331/ZNF791/ZNF829/ZNF230/ZNF417/CASP9/ZNF615/STAT2/ZNF879/ZNF471/ZNF229/ZNF44/ZNF667/ZNF324B/IFNGR1/ZNF26/ZNF577/ZNF527/ZNF814/ZNF324/ZNF529/ZNF133/SRSF8/ZNF805/ZNF350/ZNF568/ZFP69B/ZNF226/ZNF841/ZNF160/ZNF275/HLA-B/CYCS/MTOR	46
238	upregulated.Antt vs VC	Upregulated	Antt vs VC	hsa04140	Autophagy - animal	18/370	141/8163	6.28339e-05	0.00628339	0.00610702	RAB39B/ATG9B/DDIT4/MAP1LC3B/EIF2AK3/ERN1/MAP1LC3B2/C9orf72/RAB33B/ATG101/WIPI1/ATG13/MTMR14/NRBF2/BNIP3/PIK3C3/SQSTM1/MTOR	18
239	upregulated.Antt vs VC	Upregulated	Antt vs VC	hsa05022	Pathways of neurodegeneration - multiple diseases	39/370	476/8163	0.000209813	0.0136729	0.0132891	WNT1/RAB39B/DNAH7/PRPH/DDIT3/HSPA5/RYR1/CACNA1B/NOS1/DNAH12/KLC4/DNAH3/MAP1LC3B/EIF2AK3/ERN1/MAP1LC3B2/C9orf72/DNAL1/ATF6/CASP9/CHMP2B/DNAH6/ATG101/WIPI1/FIG4/ATG13/MAPK13/PSMC4/UBA7/NRBF2/RYR2/ATF4/DERL1/CYCS/PIK3C3/PRNP/CSNK2A1/SQSTM1/MTOR	39
240	upregulated.Antt vs VC	Upregulated	Antt vs VC	hsa05014	Amyotrophic lateral sclerosis	32/370	364/8163	0.000227882	0.0136729	0.0132891	RAB39B/DNAH7/PRPH/DDIT3/HSPA5/NOS1/DNAH12/KLC4/DNAH3/MAP1LC3B/EIF2AK3/ERN1/MAP1LC3B2/C9orf72/DNAL1/ATF6/CASP9/CHMP2B/DNAH6/ATG101/WIPI1/FIG4/ATG13/MAPK13/PSMC4/NRBF2/ATF4/DERL1/CYCS/PIK3C3/SQSTM1/MTOR	32
241	upregulated.Antt vs VC	Upregulated	Antt vs VC	hsa04137	Mitophagy - animal	11/370	72/8163	0.000357839	0.0178919	0.0173897	ATG9B/MAP1LC3B/EIF2AK3/MAP1LC3B2/BNIP3L/TBC1D15/USP15/BNIP3/ATF4/CSNK2A1/SQSTM1	11
242	upregulated.Antt vs VC	Upregulated	Antt vs VC	hsa03060	Protein export	6/370	23/8163	0.000435657	0.018671	0.0181469	HSPA5/SRP54/SEC11C/SEC63/SRPRB/SRPRA	6
243	upregulated.Antt vs VC	Upregulated	Antt vs VC	hsa04130	SNARE interactions in vesicular transport	7/370	33/8163	0.0005704	0.02139	0.0207896	GOSR2/GOSR1/VAMP4/VAMP2/YKT6/BET1/STX4	7
244	upregulated.Antt vs VC	Upregulated	Antt vs VC	hsa00520	Amino sugar and nucleotide sugar metabolism	8/370	49/8163	0.00145611	0.0485369	0.0471744	RENBP/HK2/GALK2/GFUS/GNPDA1/PGM3/GFPT1/HEXA	8
245	upregulated.??-T3 vs VC	Upregulated	??-T3 vs VC	hsa05168	Herpes simplex virus 1 infection	72/513	495/8163	6.45218e-12	1.99372e-09	1.92886e-09	ZNF177/ZNF222/ZNF550/ZFP37/TLR3/TNFRSF14/EIF2AK3/ZNF829/ZNF81/ZNF10/IFIH1/ZNF230/ZNF587/ZNF331/ZNF791/ZNF547/ZNF133/ZNF432/ZNF140/ZNF417/ZNF805/ZNF667/STAT2/IFNGR1/ZNF284/ZNF529/ZNF324B/ZNF26/ZNF814/ZNF275/ZFP69B/ZNF324/ZNF229/ZNF879/ZNF615/ZNF707/ZNF527/ZNF471/CASP9/ZNF484/ZNF44/ZNF566/ZNF568/ZNF350/ZNF420/ZNF816/ZNF841/ZNF577/ZNF584/ZNF184/ZNF226/ZNF12/ZNF304/ZNF875/RELA/ZNF160/SRSF8/ZNF3/ZNF34…	72
246	upregulated.??-T3 vs VC	Upregulated	??-T3 vs VC	hsa04141	Protein processing in endoplasmic reticulum	33/513	171/8163	4.77009e-09	7.36979e-07	7.13003e-07	HERPUD1/DDIT3/HSPA5/ERN1/HYOU1/EIF2AK3/SYVN1/MAN1C1/RNF185/ATF6/DNAJC3/SEL1L/SEC24A/SAR1B/SELENOS/P4HB/DNAJC10/SEC24D/UBXN8/ATF4/ERLEC1/SEC23B/ATXN3/DNAJB11/HSP90B1/SEC63/DERL1/PDIA4/DNAJC1/UBXN1/PREB/SEC61A1/SEC31A	33
247	upregulated.??-T3 vs VC	Upregulated	??-T3 vs VC	hsa04140	Autophagy - animal	25/513	141/8163	1.89816e-06	0.000195511	0.00018915	RAB39B/ATG9B/MAP1LC3B/ERN1/DDIT4/MAP1LC3B2/EIF2AK3/C9orf72/RAB33B/ATG101/WIPI1/ATG13/NRBF2/MTMR14/SQSTM1/ATG14/ATG4B/RRAGD/UVRAG/RB1CC1/ITPR1/MTOR/PIK3C3/ATG3/BNIP3	25
248	upregulated.??-T3 vs VC	Upregulated	??-T3 vs VC	hsa04130	SNARE interactions in vesicular transport	11/513	33/8163	2.95513e-06	0.000228284	0.000220857	GOSR2/GOSR1/VAMP4/BET1/BNIP1/STX4/YKT6/BET1L/STX18/VAMP2/STX5	11
249	upregulated.??-T3 vs VC	Upregulated	??-T3 vs VC	hsa04137	Mitophagy - animal	15/513	72/8163	3.15167e-05	0.00194773	0.00188437	ATG9B/MAP1LC3B/MAP1LC3B2/EIF2AK3/TBC1D15/BNIP3L/USP15/SQSTM1/TBC1D17/ATF4/USP8/RELA/CSNK2A1/BNIP3/NBR1	15
250	upregulated.??-T3 vs VC	Upregulated	??-T3 vs VC	hsa04721	Synaptic vesicle cycle	14/513	78/8163	0.000307644	0.0158437	0.0153282	ATP6V0D2/UNC13A/SNAP25/CACNA1B/SLC6A9/ATP6V0A2/RAB3A/ATP6V0B/NAPA/ATP6V1D/ATP6V1C1/ATP6V1H/VAMP2/ATP6V0D1	14
251	upregulated.??-T3 vs VC	Upregulated	??-T3 vs VC	hsa03060	Protein export	7/513	23/8163	0.000376081	0.0166013	0.0160612	HSPA5/SRP54/SEC11C/SRPRB/SRPRA/SEC63/SEC61A1	7
252	upregulated.??-T3 vs VC	Upregulated	??-T3 vs VC	hsa04136	Autophagy - other	8/513	32/8163	0.000631437	0.0243892	0.0235958	ATG9B/ATG101/WIPI1/ATG13/ATG4B/MTOR/PIK3C3/ATG3	8
253	upregulated.??-T3 vs VC	Upregulated	??-T3 vs VC	hsa05110	Vibrio cholerae infection	10/513	50/8163	0.000921775	0.0316476	0.030618	ATP6V0D2/ATP6V0A2/ATP6V0B/ATP6V1D/KDELR3/ATP6V1C1/ATP6V1H/PDIA4/ATP6V0D1/SEC61A1	10
254	upregulated.??-T3 vs VC	Upregulated	??-T3 vs VC	hsa05168	Herpes simplex virus 1 infection	70/529	495/8163	2.04601e-10	6.42446e-08	6.20263e-08	ZNF177/TLR3/ZNF222/ZFP37/ZNF550/ZNF10/IFIH1/TNFRSF14/ZNF81/EIF2AK3/ZNF140/ZNF284/ZNF829/ZNF432/ZNF615/ZNF587/ZNF133/ZNF791/ZNF324B/ZNF417/ZNF230/ZNF331/ZNF26/ZNF229/ZNF667/CASP9/ZNF14/ZNF547/IFNGR1/STAT2/ZNF805/ZNF577/ZNF879/ZNF324/ZNF527/ZNF350/ZNF814/ZNF471/ZNF816/ZNF44/ZNF529/ZNF568/ZNF226/ZFP69B/ZNF461/ZNF566/ZNF584/ZNF707/ZNF420/ZNF891/ZNF484/ZNF181/HLA-B/ZNF275/CYCS/ZNF160/ZNF841/SRSF8/ZNF8…	70
255	upregulated.??-T3 vs VC	Upregulated	??-T3 vs VC	hsa04141	Protein processing in endoplasmic reticulum	32/529	171/8163	3.72873e-08	5.85411e-06	5.65197e-06	DDIT3/HERPUD1/HSPA5/MAN1C1/HYOU1/ERN1/EIF2AK3/SYVN1/ATF6/RNF185/DNAJC10/SAR1B/P4HB/DNAJC3/SEL1L/SELENOS/UBXN8/SEC24A/ERLEC1/DNAJC1/SEC63/UBXN1/SEC23B/SEC24D/ATF4/HSP90B1/DERL1/ATXN3/DNAJB11/PDIA4/SEC61A1/PREB	32
256	upregulated.??-T3 vs VC	Upregulated	??-T3 vs VC	hsa04140	Autophagy - animal	25/529	141/8163	3.30644e-06	0.000346074	0.000334124	RAB39B/ATG9B/DDIT4/ERN1/MAP1LC3B/MAP1LC3B2/EIF2AK3/C9orf72/RAB33B/ATG101/WIPI1/MTMR14/ATG13/RRAGD/BNIP3/NRBF2/ITPR1/SQSTM1/ATG4B/MTOR/ATG14/CTSD/PIK3C3/RB1CC1/ATG3	25
257	upregulated.??-T3 vs VC	Upregulated	??-T3 vs VC	hsa04721	Synaptic vesicle cycle	16/529	78/8163	3.09154e-05	0.00242686	0.00234306	UNC13A/ATP6V0D2/CPLX1/CACNA1B/ATP6V1G2/SNAP25/RAB3A/SLC6A9/ATP6V0A2/ATP6V1D/ATP6V0B/NAPA/VAMP2/ATP6V1H/ATP6V1C1/ATP6V0D1	16
258	upregulated.??-T3 vs VC	Upregulated	??-T3 vs VC	hsa03060	Protein export	8/529	23/8163	6.0633e-05	0.00380775	0.00367627	HSPA5/SEC11C/SRP54/IMMP1L/SEC63/SRPRB/SRPRA/SEC61A1	8
259	upregulated.??-T3 vs VC	Upregulated	??-T3 vs VC	hsa04137	Mitophagy - animal	14/529	72/8163	0.000175961	0.00920865	0.00889068	ATG9B/MAP1LC3B/MAP1LC3B2/EIF2AK3/TBC1D15/BNIP3L/USP15/BNIP3/TBC1D17/USP8/SQSTM1/ATF4/CSNK2A1/NBR1	14
260	upregulated.??-T3 vs VC	Upregulated	??-T3 vs VC	hsa05110	Vibrio cholerae infection	11/529	50/8163	0.000280784	0.0125952	0.0121603	ATP6V0D2/ATP6V1G2/ATP6V0A2/ATP6V1D/ATP6V0B/KDELR3/ATP6V1H/ATP6V1C1/PDIA4/ATP6V0D1/SEC61A1	11
261	upregulated.??-T3 vs VC	Upregulated	??-T3 vs VC	hsa04136	Autophagy - other	8/529	32/8163	0.000774225	0.0303883	0.0293391	ATG9B/ATG101/WIPI1/ATG13/ATG4B/MTOR/PIK3C3/ATG3	8
262	upregulated.??-T3 vs VC	Upregulated	??-T3 vs VC	hsa04130	SNARE interactions in vesicular transport	8/529	33/8163	0.000964968	0.0336667	0.0325042	VAMP4/GOSR2/GOSR1/BET1/VAMP2/STX4/YKT6/BET1L	8
263	upregulated.??-T3 vs VC	Upregulated	??-T3 vs VC	hsa04966	Collecting duct acid secretion	7/529	27/8163	0.00131004	0.0411354	0.039715	ATP4A/ATP6V0D2/ATP6V1G2/ATP6V0A2/ATP6V1D/ATP6V1C1/ATP6V0D1	7
